# Supplementary material for: Viral Dark Matter in the Gut Virome of Elderly Humans
Source: Preprints.org preprint supplement (doi:10.20944/preprints201807.0101.v1), 2018-07-05
Supplement: Supplementary file 1 [file Supp_Table_10_CARD.results.xlsx]

## Sheet: Sheet1
qseqid	sseqid	pident	length	mismatch	gapopen	qstart	qend	sstart	send	evalue	bitscore
EM298_T0.NODE_5_length_81480_cov_43.5962_89	gi|4103865|ARO:3002875|dfrE_[Enterococcus_faecalis]	37.7	183	79	4	158	340	4	151	9e-35	113
EM318_T0.NODE_2_length_42727_cov_18.1325_34	gi|4103865|ARO:3002875|dfrE_[Enterococcus_faecalis]	40.61	165	86	4	145	309	1	153	5e-34	110
EM298_T0.NODE_14_length_22200_cov_18.0131_37	gi|4103865|ARO:3002875|dfrE_[Enterococcus_faecalis]	29.03	124	85	2	124	244	4	127	6e-22	76.3
EM298_T0.NODE_8_length_51152_cov_12.8219_45	gi|4103865|ARO:3002875|dfrE_[Enterococcus_faecalis]	26.67	105	76	1	122	225	4	108	2e-15	57
EM251_T3.NODE_4_length_78849_cov_53.4296_68	gi|4103865|ARO:3002875|dfrE_[Enterococcus_faecalis]	24.8	125	80	3	132	256	4	114	5e-11	45.4
EM229_T3.NODE_2_length_85728_cov_25.2924_86	gi|4103865|ARO:3002875|dfrE_[Enterococcus_faecalis]	24.39	123	78	4	121	243	1	108	4e-10	42.7
EM200_T3.NODE_3_length_77782_cov_65.9425_72	gi|4103865|ARO:3002875|dfrE_[Enterococcus_faecalis]	21.88	128	86	2	130	257	1	114	1e-09	41.6
EM298_T0.NODE_5_length_81480_cov_43.5962_45	gi|4103865|ARO:3002875|dfrE_[Enterococcus_faecalis]	25.69	109	71	2	135	243	1	99	3e-09	40.4
EM219_T3.NODE_4_length_39430_cov_16.3294_10	gi|324324514|ARO:3000717|antibiotic_sensitive_signal_peptidase_I_[Bacillus_thuringiensis_serovar_finitimus_YBT-020]	45.65	46	23	1	62	105	34	79	9e-09	38.1
EM245_T3.NODE_5_length_84927_cov_79.2973_44	gi|4103865|ARO:3002875|dfrE_[Enterococcus_faecalis]	21.95	123	81	4	121	243	1	108	1e-08	38.9
EM175_T0.NODE_2_length_85426_cov_54.412_40	gi|4103865|ARO:3002875|dfrE_[Enterococcus_faecalis]	23.58	123	79	4	133	255	1	108	2e-08	37.7
EM175_T0.NODE_3_length_84521_cov_372.977_61	gi|4103865|ARO:3002875|dfrE_[Enterococcus_faecalis]	22.69	119	78	4	123	240	4	109	2e-07	35
EM195_T0.NODE_1_length_98920_cov_30.1028_64	gi|485965|ARO:3000380|FosC_[Pseudomonas_syringae]	29.82	57	38	1	54	110	59	113	2e-07	33.5
EM219_T3.NODE_4_length_39430_cov_16.3294_47	gi|507722026|ARO:3002975|vanTN_[Enterococcus_faecium]	38.46	52	31	1	72	123	624	674	3e-07	37.7
EM314_T0.NODE_4_length_41356_cov_14.5302_17	gi|198447194|ARO:3000853|AIM-1_[Pseudomonas_aeruginosa]	27.78	72	46	2	9	74	54	125	3e-07	36.2
EM314_T0.NODE_4_length_41356_cov_14.5302_17	gi|197296825|ARO:3002485|LRA-2_[uncultured_bacterium_BLR2]	29.17	72	45	3	9	74	62	133	3e-07	36.2
EM175_T0.NODE_2_length_85426_cov_54.412_56	gi|49483993|ARO:3000621|PC1_beta-lactamase_(blaZ)_[Staphylococcus_aureus_subsp._aureus_MRSA252]	25	104	63	5	133	234	189	279	5e-07	35.4
EM175_T0.NODE_3_length_84521_cov_372.977_76	gi|49483993|ARO:3000621|PC1_beta-lactamase_(blaZ)_[Staphylococcus_aureus_subsp._aureus_MRSA252]	29.69	64	43	1	133	194	189	252	5e-07	35.4
EM200_T3.NODE_3_length_77782_cov_65.9425_105	gi|3126909|ARO:3002560|AAC(6)-Iq_[Klebsiella_pneumoniae]	26.17	107	65	3	45	140	39	142	5e-07	33.9
EM245_T3.NODE_5_length_84927_cov_79.2973_59	gi|49483993|ARO:3000621|PC1_beta-lactamase_(blaZ)_[Staphylococcus_aureus_subsp._aureus_MRSA252]	25	104	63	5	133	234	189	279	5e-07	35.4
EM245_T3.NODE_6_length_83378_cov_234.054_51	gi|49483993|ARO:3000621|PC1_beta-lactamase_(blaZ)_[Staphylococcus_aureus_subsp._aureus_MRSA252]	29.69	64	43	1	133	194	189	252	5e-07	35.4
EM229_T3.NODE_2_length_85728_cov_25.2924_103	gi|49483993|ARO:3000621|PC1_beta-lactamase_(blaZ)_[Staphylococcus_aureus_subsp._aureus_MRSA252]	24.04	104	64	5	133	234	189	279	7e-07	34.7
EM181_T3.NODE_2_length_58555_cov_110.392_63	gi|306485917|ARO:3000553|adeR_[Acinetobacter_baumannii]	37.5	40	25	0	54	93	30	69	9e-07	31.6
EM245_T3.NODE_5_length_84927_cov_79.2973_84	gi|388533500|ARO:3003092|Enterococcus_faecium_cls_conferring_resistance_to_daptomycin_[Enterococcus_faecium_DO]	27.91	86	50	3	13	88	324	407	1e-06	32.3
EM245_T3.NODE_6_length_83378_cov_234.054_64	gi|4103865|ARO:3002875|dfrE_[Enterococcus_faecalis]	21.85	119	79	4	123	240	4	109	1e-06	32.7
EM298_T0.NODE_5_length_81480_cov_43.5962_27	gi|256862196|ARO:3001170|SHV-123_[Klebsiella_pneumoniae]	29.2	113	66	3	50	159	152	253	1e-06	33.9
EM298_T0.NODE_8_length_51152_cov_12.8219_34	gi|29027623|ARO:3002539|AAC(3)-IVa_[Campylobacter_jejuni]	41.38	29	17	0	59	87	53	81	1e-06	30.4
EM245_T3.NODE_3_length_98041_cov_58.6819_77	gi|56962848|ARO:3002816|clbC_[Bacillus_clausii_KSM-K16]	36.67	60	29	2	44	97	92	148	2e-06	33.9
EM175_T0.NODE_3_length_84521_cov_372.977_74	gi|2769708|ARO:3000118|vgaB_[Staphylococcus_aureus]	33.33	84	43	3	478	559	98	170	3e-06	35.8
EM175_T0.NODE_4_length_50494_cov_102.298_88	gi|347990723|ARO:3002912|vanN_[Enterococcus_faecium]	27.68	112	62	5	15	121	142	239	3e-06	32
EM200_T3.NODE_1_length_95266_cov_17.3235_48	gi|313848515|ARO:3003106|Erm(42)_[Pasteurella_multocida]	33.33	66	39	1	39	104	228	288	3e-06	30.8
EM229_T3.NODE_1_length_98245_cov_40.5335_7	gi|115250448|ARO:3000723|cycloserine_sensitive_D-alanine_synthetase_[Clostridium_difficile_630]	41.18	51	22	3	257	300	249	298	3e-06	33.9
EM229_T3.NODE_5_length_53163_cov_11.7832_63	gi|538380902|ARO:3000737|rifamycin_sensitive_beta-subunit_of_RNA_polymerase_(rpoB)_[Streptococcus_intermedius_B196]	28.21	78	50	2	36	111	300	373	3e-06	33.1
EM229_T3.NODE_5_length_53163_cov_11.7832_63	gi|538452097|ARO:3000737|rifamycin_sensitive_beta-subunit_of_RNA_polymerase_(rpoB)_[Streptococcus_intermedius_C270]	28.21	78	50	2	36	111	300	373	3e-06	33.1
EM235_T6.NODE_2_length_50063_cov_151.402_6	gi|461692406|ARO:3003198|rmtH_[Klebsiella_pneumoniae]	40	35	21	0	24	58	6	40	3e-06	31.2
EM245_T3.NODE_6_length_83378_cov_234.054_53	gi|2769708|ARO:3000118|vgaB_[Staphylococcus_aureus]	33.33	84	43	3	478	559	98	170	3e-06	35.8
EM251_T3.NODE_2_length_93009_cov_46.3231_40	gi|374434363|ARO:3000448|qepA_[Enterobacter_aerogenes]	28.4	81	55	1	4	81	341	421	3e-06	32
EM251_T3.NODE_4_length_78849_cov_53.4296_44	gi|154685028|ARO:3002814|clbA_[Bacillus_amyloliquefaciens_subsp._plantarum_str._FZB42]	38.46	39	23	1	21	58	120	158	3e-06	30.4
EM274_T0.NODE_1_length_107962_cov_925.094_110	gi|150956803|ARO:3000735|fluoroquinolone_sensitive_parC_[Klebsiella_pneumoniae_subsp._pneumoniae_MGH_78578]	23.39	218	145	7	706	910	190	398	3e-06	37.7
EM298_T0.NODE_10_length_40025_cov_35.5554_8	gi|356598150|ARO:3000730|elongation_factor_G_[Pasteurella_multocida_36950]	28.28	99	54	3	256	352	545	628	3e-06	35.4
EM314_T0.NODE_4_length_41356_cov_14.5302_17	gi|8980430|ARO:3000606|FEZ-1_beta-lactamase_[Fluoribacter_gormanii]	35.29	51	29	2	14	60	46	96	3e-06	32.7
EM175_T0.NODE_3_length_84521_cov_372.977_76	gi|161508254|ARO:3000621|PC1_beta-lactamase_(blaZ)_[Staphylococcus_aureus_subsp._aureus_USA300_TCH959]	28.12	64	44	1	133	194	189	252	4e-06	32.7
EM245_T3.NODE_6_length_83378_cov_234.054_51	gi|161508254|ARO:3000621|PC1_beta-lactamase_(blaZ)_[Staphylococcus_aureus_subsp._aureus_USA300_TCH959]	28.12	64	44	1	133	194	189	252	4e-06	32.7
EM314_T0.NODE_4_length_41356_cov_14.5302_17	gi|197296828|ARO:3002487|LRA-8_[uncultured_bacterium_BLR8]	30.14	73	45	2	9	75	60	132	4e-06	32.7
EM195_T0.NODE_1_length_98920_cov_30.1028_7	gi|48727554|ARO:3000300|lsaA_[Enterococcus_faecalis]	32.53	83	47	2	32	108	334	413	5e-06	33.5
EM219_T3.NODE_4_length_39430_cov_16.3294_10	gi|388533562|ARO:3000717|antibiotic_sensitive_signal_peptidase_I_[Enterococcus_faecium_DO]	36.36	44	28	0	62	105	12	55	5e-06	30
EM229_T3.NODE_2_length_85728_cov_25.2924_71	gi|225185492|ARO:3000724|fosfomycin_sensitive_pyruvyl_transferase_(murA)_[Bacillus_subtilis_subsp._subtilis_str._168]	25.6	125	77	4	1	115	215	333	5e-06	34.3
EM235_T6.NODE_2_length_50063_cov_151.402_77	gi|347990723|ARO:3002912|vanN_[Enterococcus_faecium]	27.68	112	62	5	28	134	142	239	5e-06	32
EM274_T0.NODE_1_length_107962_cov_925.094_110	gi|295059132|ARO:3000735|fluoroquinolone_sensitive_parC_[Enterobacter_cloacae_subsp._cloacae_ATCC_13047]	23.42	222	148	7	706	914	190	402	5e-06	36.6
EM175_T0.NODE_3_length_84521_cov_372.977_76	gi|90969158|ARO:3000621|PC1_beta-lactamase_(blaZ)_[Staphylococcus_aureus]	28.12	64	44	1	133	194	189	252	6e-06	32
EM181_T3.NODE_2_length_58555_cov_110.392_62	gi|1736787|ARO:3000829|baeS_[Escherichia_coli_str._K-12_substr._W3110]	23.85	109	82	1	44	151	222	330	6e-06	32.3
EM195_T0.NODE_3_length_46335_cov_10.211_2	gi|269202307|ARO:3000815|mgrA_[Staphylococcus_aureus_subsp._aureus_ED98]	32.69	52	35	0	1	52	7	58	6e-06	30
EM219_T3.NODE_4_length_39430_cov_16.3294_10	gi|226096767|ARO:3000717|antibiotic_sensitive_signal_peptidase_I_[Brevibacillus_brevis_NBRC_100599]	32.26	93	29	5	62	122	31	121	6e-06	30
EM219_T3.NODE_4_length_39430_cov_16.3294_10	gi|226313819|ARO:3000717|antibiotic_sensitive_signal_peptidase_I_[Brevibacillus_brevis_NBRC_100599]	32.26	93	29	5	62	122	31	121	6e-06	30
EM235_T6.NODE_1_length_99627_cov_319.279_176	gi|324324000|ARO:3000735|fluoroquinolone_sensitive_parC_[Bacillus_thuringiensis_serovar_finitimus_YBT-020]	21.43	126	82	3	44	152	433	558	6e-06	32.7
EM274_T0.NODE_3_length_32293_cov_19.3486_38	gi|1788562|ARO:3003294|Escherichia_coli_gyrA_conferring_resistance_to_fluoroquinolones_[Escherichia_coli_str._K-12_substr._MG1655]	26.92	78	47	2	27	103	447	515	6e-06	31.2
EM274_T0.NODE_3_length_32293_cov_19.3486_38	gi|81241786|ARO:3000733|fluoroquinolone_sensitive_gyrA_[Shigella_dysenteriae_Sd197]	26.92	78	47	2	27	103	447	515	6e-06	31.2
EM274_T0.NODE_3_length_32293_cov_19.3486_38	gi|15832368|ARO:3000733|fluoroquinolone_sensitive_gyrA_[Escherichia_coli_O157:H7_str._Sakai]	26.92	78	47	2	27	103	447	515	6e-06	31.2
EM175_T0.NODE_3_length_84521_cov_372.977_76	gi|161510933|ARO:3000621|PC1_beta-lactamase_(blaZ)_[Staphylococcus_aureus_subsp._aureus_USA300_TCH1516]	28.12	64	44	1	133	194	189	252	7e-06	32
EM175_T0.NODE_3_length_84521_cov_372.977_76	gi|32470368|ARO:3000621|PC1_beta-lactamase_(blaZ)_[Staphylococcus_aureus]	28.12	64	44	1	133	194	189	252	7e-06	32
EM219_T3.NODE_4_length_39430_cov_16.3294_10	gi|115250367|ARO:3000717|antibiotic_sensitive_signal_peptidase_I_[Clostridium_difficile_630]	57.14	21	9	0	61	81	32	52	7e-06	30
EM235_T6.NODE_1_length_99627_cov_319.279_176	gi|47500408|ARO:3000733|fluoroquinolone_sensitive_gyrA_[Bacillus_anthracis_str._Ames_Ancestor]	21.43	126	82	3	44	152	433	558	7e-06	32.3
EM245_T3.NODE_6_length_83378_cov_234.054_51	gi|161510933|ARO:3000621|PC1_beta-lactamase_(blaZ)_[Staphylococcus_aureus_subsp._aureus_USA300_TCH1516]	28.12	64	44	1	133	194	189	252	7e-06	32
EM245_T3.NODE_6_length_83378_cov_234.054_51	gi|90969158|ARO:3000621|PC1_beta-lactamase_(blaZ)_[Staphylococcus_aureus]	28.12	64	44	1	133	194	189	252	7e-06	32
EM245_T3.NODE_6_length_83378_cov_234.054_51	gi|32470368|ARO:3000621|PC1_beta-lactamase_(blaZ)_[Staphylococcus_aureus]	28.12	64	44	1	133	194	189	252	7e-06	32
EM229_T3.NODE_2_length_85728_cov_25.2924_103	gi|161508254|ARO:3000621|PC1_beta-lactamase_(blaZ)_[Staphylococcus_aureus_subsp._aureus_USA300_TCH959]	22.12	104	66	4	133	234	189	279	8e-06	31.6
EM251_T3.NODE_4_length_78849_cov_53.4296_5	gi|197296827|ARO:3002510|LRA-3_[uncultured_bacterium_BLR3]	35.71	42	23	1	30	67	173	214	8e-06	28.5
EM200_T3.NODE_3_length_77782_cov_65.9425_98	gi|154685028|ARO:3002814|clbA_[Bacillus_amyloliquefaciens_subsp._plantarum_str._FZB42]	32.73	55	35	2	21	73	120	174	9e-06	28.9
EM219_T3.NODE_4_length_39430_cov_16.3294_10	gi|441470939|ARO:3000717|antibiotic_sensitive_signal_peptidase_I_[Listeria_monocytogenes]	42.31	26	15	0	56	81	32	57	9e-06	29.6
EM251_T3.NODE_2_length_93009_cov_46.3231_74	gi|BAM46120.1|ARO:3003677|AAC(6)-Iaj_[Pseudomonas_aeruginosa]	32.73	55	36	1	52	106	87	140	9e-06	29.6
EM251_T3.NODE_2_length_93009_cov_46.3231_124	gi|229369053|ARO:3001312|elfamycin_resistant_EF-Tu_[Vibrio_cholerae_MJ-1236]	32.69	52	34	1	203	254	41	91	9e-06	32.3
EM251_T3.NODE_2_length_93009_cov_46.3231_124	gi|229369011|ARO:3001312|elfamycin_resistant_EF-Tu_[Vibrio_cholerae_MJ-1236]	32.69	52	34	1	203	254	24	74	9e-06	32.3
EM251_T3.NODE_2_length_93009_cov_46.3231_131	gi|13883857|ARO:3003458|mycobacterium_tuberculosis_ethA_mutant_conferring_resistance_to_ethionamide_[Mycobacterium_tuberculosis_CDC1551]	40.62	32	19	0	96	127	141	172	9e-06	31.6
