# Supplementary material for: Viral Dark Matter in the Gut Virome of Elderly Humans
Source: Preprints.org preprint supplement (doi:10.20944/preprints201807.0101.v1), 2018-07-05
Supplement: Supplementary file 2 [file Supp_Table_1_Sample.metadata.xlsx]

## Sheet: SupplementaryTable1
Sample ID	Age (years)	Gender	Subgroup	Antibiotics in last year	Bioproject	SRA Accession	Shannon Diversity
EM081_T3	75	Female	Community	No	PRJNA385126	SRR5495038	2.90929
EM100_T6	69	Female	Community	No	PRJNA385126	SRR5495037	4.34986
EM173_T3	84	Female	Longstay	No	PRJNA385126	SRR5495036	2.63961
EM175_T0	93	Male	Community	No	PRJNA385126	SRR5495035	2.71134
EM181_T3	85	Male	Community	No	PRJNA385126	SRR5495034	4.34731
EM195_T0	78	Male	Longstay	No	PRJNA385126	SRR5495033	4.02838
EM198_T6	92	Female	Longstay	No	PRJNA385126	SRR5495032	1.89663
EM200_T3	81	Female	Longstay	No	PRJNA385126	SRR5495031	3.96572
EM210_T0	87	Female	Longstay	No	PRJNA385126	SRR5495030	3.67918
EM219_T3	77	Female	Longstay	No	PRJNA385126	SRR5495029	2.82708
EM229_T3	75	Female	Community	No	PRJNA385126	SRR5495028	2.87443
EM231_T3	78	Female	Community	No	PRJNA385126	SRR5495027	4.16641
EM235_T6	81	Female	Community	No	PRJNA385126	SRR5495026	4.311
EM241_T0	69	Female	Community	No	PRJNA385126	SRR5495025	2.92959
EM245_T3	67	Female	Community	No	PRJNA385126	SRR5495024	4.24573
EM251_T3	88	Female	Community	No	PRJNA385126	SRR5495023	4.32993
EM274_T0	84	Female	Longstay	No	PRJNA385126	SRR5495022	3.88024
EM298_T0	72	Female	Longstay	No	PRJNA385126	SRR5495021	3.26441
EM314_T0	83	Female	Longstay	No	PRJNA385126	SRR5495020	3.53625
EM318_T0	70	Male	Longstay	No	PRJNA385126	SRR5495019	3.52021
