# Supplementary material for: Viral Dark Matter in the Gut Virome of Elderly Humans
Source: Preprints.org preprint supplement (doi:10.20944/preprints201807.0101.v1), 2018-07-05
Supplement: Supplementary file 3 [file Supp_Table_2_Seq.reads.results.xlsx]

## Sheet: SupplementaryTable2
Sample ID	Raw read pairs	Read pairs after quality filtering	Percentage Human reads
EM081_T3	1651742	1157691	0.00405981
EM100_T6	1082607	755944	0.00145513
EM173_T3	1669084	1116317	0.00152286
EM175_T0	1370343	956885	0.00658386
EM181_T3	2273886	1556921	0.00231226
EM195_T0	1425376	976323	0.00389215
EM198_T6	798978	579719	0.00120748
EM200_T3	1658975	1180674	0.00169395
EM210_T0	1572533	1044977	0.0306227
EM219_T3	1172848	839536	0.00381163
EM229_T3	2012441	1393742	0.00846642
EM231_T3	1546365	1079411	0.000833788
EM235_T6	842822	556038	0.00215813
EM241_T0	1326748	833375	0.00143993
EM245_T3	865008	526825	0.00569449
EM251_T3	1156668	735179	0.00204032
EM274_T0	1463744	917618	0.00152569
EM298_T0	1244184	770922	0.00402116
EM314_T0	1342393	920833	0.00488688
EM318_T0	1172629	796804	0.00112951
