# Supplementary material for: Viral Dark Matter in the Gut Virome of Elderly Humans
Source: Preprints.org preprint supplement (doi:10.20944/preprints201807.0101.v1), 2018-07-05
Supplement: Supplementary file 4 [file Supp_Table_3_Virsorter.contigs.xlsx]

## Sheet: VirSorter_output
Contig_id	FastaID	Coverage	Length	Circular	Crispr_spacer	tRNA BLASTn hit	VirSorter Category
VIRSorter_EM245_T3_NODE_1_length_118143_cov_52_1293	EM245_T3.NODE_1_length_118143_cov_52.1293	52.1293	118143	Non-circular	#N/A	Herpetosiphon_aurantiacus_ATCC_23779_chr.trna19-ProTGG	6
VIRSorter_EM274_T0_NODE_1_length_107962_cov_925_094	EM274_T0.NODE_1_length_107962_cov_925.94	925.94	107962	circular	#N/A	#N/A	2
VIRSorter_EM241_T0_NODE_1_length_103013_cov_128_768	EM241_T0.NODE_1_length_103013_cov_128.768	128.768	103013	circular	#N/A	Bacteroides_vulgatus_ATCC_8482_chr.trna10-MetCAT	6
VIRSorter_EM314_T0_NODE_1_length_101602_cov_307_528	EM314_T0.NODE_1_length_101602_cov_307.528	307.528	101602	circular	#N/A	Bacteroides_vulgatus_ATCC_8482_chr.trna10-MetCAT	6
VIRSorter_EM235_T6_NODE_1_length_99627_cov_319_279-circular	EM235_T6.NODE_1_length_99627_cov_319.279	319.279	99627	circular	#N/A	Borrelia_garinii_PBi_chrlinear.trna22-ArgTCT	6
VIRSorter_EM195_T0_NODE_1_length_98920_cov_30_1028-circular	EM195_T0.NODE_1_length_98920_cov_30.1028	30.1028	98920	Non-circular	#N/A	#N/A	6
VIRSorter_EM229_T3_NODE_1_length_98245_cov_40_5335-circular	EM229_T3.NODE_1_length_98245_cov_40.5335	40.5335	98245	Non-circular	#N/A	#N/A	2
VIRSorter_EM245_T3_NODE_3_length_98041_cov_58_6819-circular	EM245_T3.NODE_3_length_98041_cov_58.6819	58.6819	98041	Non-circular	#N/A	#N/A	3
VIRSorter_EM200_T3_NODE_1_length_95266_cov_17_3235	EM200_T3.NODE_1_length_95266_cov_17.3235	17.3235	95266	Non-circular	#N/A	#N/A	2
VIRSorter_EM251_T3_NODE_2_length_93009_cov_46_3231-circular	EM251_T3.NODE_2_length_93009_cov_46.3231	46.3231	93009	Non-circular	#N/A	#N/A	6
VIRSorter_EM229_T3_NODE_2_length_85728_cov_25_2924-circular	EM229_T3.NODE_2_length_85728_cov_25.2924	25.2924	85728	circular	#N/A	#N/A	2
VIRSorter_EM175_T0_NODE_2_length_85426_cov_54_412-circular	EM175_T0.NODE_2_length_85426_cov_54.412	54.412	85426	Non-circular	#N/A	#N/A	2
VIRSorter_EM245_T3_NODE_5_length_84927_cov_79_2973-circular	EM245_T3.NODE_5_length_84927_cov_79.2973	79.2973	84927	Non-circular	#N/A	#N/A	2
VIRSorter_EM175_T0_NODE_3_length_84521_cov_372_977	EM175_T0.NODE_3_length_84521_cov_372.977	372.977	84521	circular	#N/A	#N/A	2
VIRSorter_EM318_T0_NODE_1_length_84326_cov_47_8923	EM318_T0.NODE_1_length_84326_cov_47.8923	47.8923	84326	Non-circular	#N/A	#N/A	6
VIRSorter_EM245_T3_NODE_6_length_83378_cov_234_054-circular	EM245_T3.NODE_6_length_83378_cov_234.54	234.54	83378	circular	#N/A	#N/A	2
VIRSorter_EM298_T0_NODE_5_length_81480_cov_43_5962	EM298_T0.NODE_5_length_81480_cov_43.5962	43.5962	81480	Non-circular	#N/A	#N/A	2
VIRSorter_EM251_T3_NODE_4_length_78849_cov_53_4296-circular	EM251_T3.NODE_4_length_78849_cov_53.4296	53.4296	78849	circular	#N/A	Ureaplasma_parvum_serovar_3_ATCC_27815_chr.trna23-ProTGG	2
VIRSorter_EM200_T3_NODE_3_length_77782_cov_65_9425-circular	EM200_T3.NODE_3_length_77782_cov_65.9425	65.9425	77782	Non-circular	#N/A	Ureaplasma_parvum_serovar_3_ATCC_27815_chr.trna23-ProTGG	2
VIRSorter_EM229_T3_NODE_4_length_64764_cov_18_4032	EM229_T3.NODE_4_length_64764_cov_18.4032	18.4032	64764	circular	#N/A	#N/A	2
VIRSorter_EM181_T3_NODE_2_length_58555_cov_110_392	EM181_T3.NODE_2_length_58555_cov_110.392	110.392	58555	Non-circular	#N/A	#N/A	2
VIRSorter_EM229_T3_NODE_5_length_53163_cov_11_7832	EM229_T3.NODE_5_length_53163_cov_11.7832	11.7832	53163	Non-circular	#N/A	#N/A	2
VIRSorter_EM298_T0_NODE_8_length_51152_cov_12_8219	EM298_T0.NODE_8_length_51152_cov_12.8219	12.8219	51152	Non-circular	#N/A	Pelobacter_propionicus_DSM_2379_chr.trna11-LeuTAA	2
VIRSorter_EM175_T0_NODE_4_length_50494_cov_102_298-circular	EM175_T0.NODE_4_length_50494_cov_102.298	102.298	50494	Non-circular	#N/A	#N/A	2
VIRSorter_EM235_T6_NODE_2_length_50063_cov_151_402-circular	EM235_T6.NODE_2_length_50063_cov_151.402	151.402	50063	Non-circular	#N/A	#N/A	2
VIRSorter_EM274_T0_NODE_2_length_48348_cov_21_2684	EM274_T0.NODE_2_length_48348_cov_21.2684	21.2684	48348	Non-circular	#N/A	#N/A	2
VIRSorter_EM298_T0_NODE_9_length_46882_cov_11_5939	EM298_T0.NODE_9_length_46882_cov_11.5939	11.5939	46882	circular	#N/A	#N/A	3
VIRSorter_EM195_T0_NODE_3_length_46335_cov_10_211	EM195_T0.NODE_3_length_46335_cov_10.211	10.211	46335	Non-circular	#N/A	#N/A	3
VIRSorter_EM318_T0_NODE_2_length_42727_cov_18_1325	EM318_T0.NODE_2_length_42727_cov_18.1325	18.1325	42727	Non-circular	#N/A	#N/A	4
VIRSorter_EM318_T0_NODE_3_length_42252_cov_23_2668	EM318_T0.NODE_3_length_42252_cov_23.2668	23.2668	42252	Non-circular	#N/A	#N/A	2
VIRSorter_EM314_T0_NODE_4_length_41356_cov_14_5302	EM314_T0.NODE_4_length_41356_cov_14.5302	14.5302	41356	Non-circular	#N/A	#N/A	2
VIRSorter_EM298_T0_NODE_10_length_40025_cov_35_5554	EM298_T0.NODE_10_length_40025_cov_35.5554	35.5554	40025	Non-circular	#N/A	#N/A	2
VIRSorter_EM219_T3_NODE_4_length_39430_cov_16_3294	EM219_T3.NODE_4_length_39430_cov_16.3294	16.3294	39430	Non-circular	#N/A	#N/A	2
VIRSorter_EM200_T3_NODE_4_length_38745_cov_11_8082-circular	EM200_T3.NODE_4_length_38745_cov_11.8082	11.8082	38745	circular	#N/A	#N/A	2
VIRSorter_EM173_T3_NODE_3_length_37141_cov_18_8105	EM173_T3.NODE_3_length_37141_cov_18.8105	18.8105	37141	Non-circular	#N/A	#N/A	2
VIRSorter_EM318_T0_NODE_6_length_33839_cov_8_3285	EM318_T0.NODE_6_length_33839_cov_8.3285	8.3285	33839	circular	Odoribacter splanchnicus	#N/A	1
VIRSorter_EM274_T0_NODE_3_length_32293_cov_19_3486	EM274_T0.NODE_3_length_32293_cov_19.3486	19.3486	32293	Non-circular	#N/A	#N/A	5
VIRSorter_EM219_T3_NODE_6_length_30373_cov_20_8496	EM219_T3.NODE_6_length_30373_cov_20.8496	20.8496	30373	Non-circular	#N/A	#N/A	1
VIRSorter_EM318_T0_NODE_9_length_29056_cov_53_6699	EM318_T0.NODE_9_length_29056_cov_53.6699	53.6699	29056	Non-circular	#N/A	#N/A	2
VIRSorter_EM235_T6_NODE_7_length_26697_cov_9_5971	EM235_T6.NODE_7_length_26697_cov_9.5971	9.5971	26697	circular	#N/A	#N/A	2
VIRSorter_EM314_T0_NODE_6_length_26300_cov_11_8854	EM314_T0.NODE_6_length_26300_cov_11.8854	11.8854	26300	Non-circular	#N/A	#N/A	4
VIRSorter_EM318_T0_NODE_12_length_23955_cov_3614_23	EM318_T0.NODE_12_length_23955_cov_3614.23	3614.23	23955	Non-circular	#N/A	#N/A	2
VIRSorter_EM298_T0_NODE_14_length_22200_cov_18_0131	EM298_T0.NODE_14_length_22200_cov_18.131	18.131	22200	Non-circular	#N/A	#N/A	2
VIRSorter_EM241_T0_NODE_10_length_15718_cov_6_6396	EM241_T0.NODE_10_length_15718_cov_6.6396	6.6396	15718	Non-circular	#N/A	#N/A	2
VIRSorter_EM298_T0_NODE_27_length_13807_cov_6_80483	EM298_T0.NODE_27_length_13807_cov_6.80483	6.80483	13807	Non-circular	#N/A	#N/A	4
VIRSorter_EM229_T3_NODE_14_length_13082_cov_8_20611	EM229_T3.NODE_14_length_13082_cov_8.20611	8.20611	13082	Non-circular	#N/A	#N/A	4
VIRSorter_EM251_T3_NODE_11_length_12732_cov_6_85738	EM251_T3.NODE_11_length_12732_cov_6.85738	6.85738	12732	Non-circular	#N/A	#N/A	4
VIRSorter_EM298_T0_NODE_32_length_11313_cov_25_9245	EM298_T0.NODE_32_length_11313_cov_25.9245	25.9245	11313	Non-circular	#N/A	#N/A	2
VIRSorter_EM219_T3_NODE_10_length_10976_cov_7_18185	EM219_T3.NODE_10_length_10976_cov_7.18185	7.18185	10976	circular	#N/A	#N/A	2
VIRSorter_EM241_T0_NODE_16_length_10909_cov_7_82477	EM241_T0.NODE_16_length_10909_cov_7.82477	7.82477	10909	Non-circular	#N/A	#N/A	4
VIRSorter_EM229_T3_NODE_17_length_10682_cov_9_86393	EM229_T3.NODE_17_length_10682_cov_9.86393	9.86393	10682	Non-circular	#N/A	#N/A	2
VIRSorter_EM235_T6_NODE_34_length_9857_cov_25_9766	EM235_T6.NODE_34_length_9857_cov_25.9766	25.9766	9857	circular	#N/A	#N/A	1
VIRSorter_EM241_T0_NODE_19_length_9818_cov_8_99027	EM241_T0.NODE_19_length_9818_cov_8.99027	8.99027	9818	Non-circular	#N/A	#N/A	5
VIRSorter_EM219_T3_NODE_12_length_9528_cov_8_35543	EM219_T3.NODE_12_length_9528_cov_8.35543	8.35543	9528	Non-circular	#N/A	Escherichia_coli_APEC_O1_chr.trna30-ArgTCT	4
VIRSorter_EM175_T0_NODE_10_length_8730_cov_5_68715	EM175_T0.NODE_10_length_8730_cov_5.68715	5.68715	8730	Non-circular	#N/A	#N/A	5
VIRSorter_EM173_T3_NODE_7_length_8664_cov_7_76257	EM173_T3.NODE_7_length_8664_cov_7.76257	7.76257	8664	Non-circular	#N/A	#N/A	2
VIRSorter_EM241_T0_NODE_21_length_7894_cov_6_85725	EM241_T0.NODE_21_length_7894_cov_6.85725	6.85725	7894	circular	#N/A	#N/A	1
VIRSorter_EM318_T0_NODE_50_length_7420_cov_5_96008	EM318_T0.NODE_50_length_7420_cov_5.96008	5.96008	7420	Non-circular	#N/A	#N/A	1
VIRSorter_EM241_T0_NODE_23_length_7097_cov_9_75376	EM241_T0.NODE_23_length_7097_cov_9.75376	9.75376	7097	Non-circular	#N/A	#N/A	2
VIRSorter_EM200_T3_NODE_24_length_6740_cov_2592_41-circular	EM200_T3.NODE_24_length_6740_cov_2592.41	2592.41	6740	circular	Odoribacter splanchnicus	#N/A	1
VIRSorter_EM298_T0_NODE_58_length_6729_cov_464_107-circular	EM298_T0.NODE_58_length_6729_cov_464.107	464.107	6729	Non-circular	#N/A	#N/A	1
VIRSorter_EM219_T3_NODE_16_length_6705_cov_5762_05-circular	EM219_T3.NODE_16_length_6705_cov_5762.5	5762.5	6705	Non-circular	Odoribacter splanchnicus	#N/A	1
VIRSorter_EM219_T3_NODE_17_length_6686_cov_117_082-circular	EM219_T3.NODE_17_length_6686_cov_117.82	117.82	6686	circular	#N/A	#N/A	1
VIRSorter_EM175_T0_NODE_13_length_6672_cov_10_5004-circular	EM175_T0.NODE_13_length_6672_cov_10.5004	10.5004	6672	circular	#N/A	#N/A	1
VIRSorter_EM318_T0_NODE_57_length_6655_cov_1239_45-circular	EM318_T0.NODE_57_length_6655_cov_1239.45	1239.45	6655	Non-circular	#N/A	#N/A	1
VIRSorter_EM298_T0_NODE_62_length_6612_cov_95_9266-circular	EM298_T0.NODE_62_length_6612_cov_95.9266	95.9266	6612	circular	#N/A	#N/A	1
VIRSorter_EM173_T3_NODE_8_length_6611_cov_22_4869-circular	EM173_T3.NODE_8_length_6611_cov_22.4869	22.4869	6611	Non-circular	Odoribacter splanchnicus	#N/A	1
VIRSorter_EM231_T3_NODE_4_length_6590_cov_22_1663-circular	EM231_T3.NODE_4_length_6590_cov_22.1663	22.1663	6590	Non-circular	#N/A	#N/A	1
VIRSorter_EM241_T0_NODE_24_length_6578_cov_71_0371-circular	EM241_T0.NODE_24_length_6578_cov_71.371	71.371	6578	Non-circular	#N/A	#N/A	1
VIRSorter_EM229_T3_NODE_23_length_6537_cov_49_5005-circular	EM229_T3.NODE_23_length_6537_cov_49.5005	49.5005	6537	Non-circular	#N/A	#N/A	1
VIRSorter_EM219_T3_NODE_18_length_6519_cov_4_35412-circular	EM219_T3.NODE_18_length_6519_cov_4.35412	4.35412	6519	circular	#N/A	#N/A	1
VIRSorter_EM251_T3_NODE_21_length_6511_cov_26_9094-circular	EM251_T3.NODE_21_length_6511_cov_26.9094	26.9094	6511	Non-circular	#N/A	#N/A	1
VIRSorter_EM198_T6_NODE_7_length_6491_cov_11130_5-circular	EM198_T6.NODE_7_length_6491_cov_11130.5	11130.5	6491	Non-circular	#N/A	#N/A	1
VIRSorter_EM251_T3_NODE_22_length_6477_cov_19_6204-circular	EM251_T3.NODE_22_length_6477_cov_19.6204	19.6204	6477	circular	#N/A	#N/A	1
VIRSorter_EM175_T0_NODE_15_length_6463_cov_117_537-circular	EM175_T0.NODE_15_length_6463_cov_117.537	117.537	6463	circular	#N/A	#N/A	1
VIRSorter_EM231_T3_NODE_5_length_6456_cov_630_198-circular	EM231_T3.NODE_5_length_6456_cov_630.198	630.198	6456	circular	#N/A	#N/A	1
VIRSorter_EM175_T0_NODE_16_length_6434_cov_115_45-circular	EM175_T0.NODE_16_length_6434_cov_115.45	115.45	6434	circular	#N/A	#N/A	1
VIRSorter_EM314_T0_NODE_17_length_6425_cov_656_027-circular	EM314_T0.NODE_17_length_6425_cov_656.27	656.27	6425	circular	#N/A	#N/A	1
VIRSorter_EM173_T3_NODE_11_length_6420_cov_9990_05-circular	EM173_T3.NODE_11_length_6420_cov_9990.5	9990.5	6420	circular	#N/A	#N/A	1
VIRSorter_EM318_T0_NODE_60_length_6411_cov_62_6963-circular	EM318_T0.NODE_60_length_6411_cov_62.6963	62.6963	6411	circular	#N/A	#N/A	1
VIRSorter_EM318_T0_NODE_61_length_6399_cov_541_824-circular	EM318_T0.NODE_61_length_6399_cov_541.824	541.824	6399	circular	#N/A	#N/A	1
VIRSorter_EM219_T3_NODE_19_length_6355_cov_2239_88-circular	EM219_T3.NODE_19_length_6355_cov_2239.88	2239.88	6355	circular	#N/A	#N/A	1
VIRSorter_EM318_T0_NODE_62_length_6337_cov_19_6493-circular	EM318_T0.NODE_62_length_6337_cov_19.6493	19.6493	6337	circular	#N/A	#N/A	1
VIRSorter_EM195_T0_NODE_10_length_6322_cov_1191_84-circular	EM195_T0.NODE_10_length_6322_cov_1191.84	1191.84	6322	circular	#N/A	#N/A	1
VIRSorter_EM235_T6_NODE_65_length_6317_cov_863_389-circular	EM235_T6.NODE_65_length_6317_cov_863.389	863.389	6317	Non-circular	#N/A	#N/A	1
VIRSorter_EM231_T3_NODE_6_length_6314_cov_9_47979-circular	EM231_T3.NODE_6_length_6314_cov_9.47979	9.47979	6314	circular	#N/A	#N/A	1
VIRSorter_EM173_T3_NODE_12_length_6310_cov_15_8342	EM173_T3.NODE_12_length_6310_cov_15.8342	15.8342	6310	circular	#N/A	#N/A	1
VIRSorter_EM251_T3_NODE_24_length_6274_cov_30_483-circular	EM251_T3.NODE_24_length_6274_cov_30.483	30.483	6274	circular	#N/A	#N/A	1
VIRSorter_EM100_T6_NODE_6_length_6223_cov_11089_9-circular	EM100_T6.NODE_6_length_6223_cov_11089.9	11089.9	6223	Non-circular	#N/A	#N/A	1
VIRSorter_EM241_T0_NODE_27_length_6217_cov_11_2579-circular	EM241_T0.NODE_27_length_6217_cov_11.2579	11.2579	6217	circular	#N/A	#N/A	1
VIRSorter_EM318_T0_NODE_65_length_6201_cov_120_388-circular	EM318_T0.NODE_65_length_6201_cov_120.388	120.388	6201	circular	#N/A	#N/A	1
VIRSorter_EM245_T3_NODE_28_length_6181_cov_21_563-circular	EM245_T3.NODE_28_length_6181_cov_21.563	21.563	6181	Non-circular	#N/A	#N/A	1
VIRSorter_EM195_T0_NODE_11_length_6177_cov_5_50523	EM195_T0.NODE_11_length_6177_cov_5.50523	5.50523	6177	Non-circular	#N/A	#N/A	2
VIRSorter_EM318_T0_NODE_66_length_6173_cov_6_00964-circular	EM318_T0.NODE_66_length_6173_cov_6.964	6.964	6173	circular	#N/A	#N/A	1
VIRSorter_EM318_T0_NODE_67_length_6169_cov_1269_72-circular	EM318_T0.NODE_67_length_6169_cov_1269.72	1269.72	6169	circular	#N/A	#N/A	1
VIRSorter_EM175_T0_NODE_18_length_6161_cov_1419_17-circular	EM175_T0.NODE_18_length_6161_cov_1419.17	1419.17	6161	circular	#N/A	#N/A	1
VIRSorter_EM175_T0_NODE_19_length_6134_cov_6393_87-circular	EM175_T0.NODE_19_length_6134_cov_6393.87	6393.87	6134	circular	#N/A	#N/A	1
VIRSorter_EM173_T3_NODE_13_length_6120_cov_2571_09-circular	EM173_T3.NODE_13_length_6120_cov_2571.9	2571.9	6120	Non-circular	#N/A	#N/A	1
VIRSorter_EM298_T0_NODE_70_length_6089_cov_8_3346-circular	EM298_T0.NODE_70_length_6089_cov_8.3346	8.3346	6089	circular	#N/A	#N/A	1
VIRSorter_EM173_T3_NODE_14_length_6085_cov_5_42488	EM173_T3.NODE_14_length_6085_cov_5.42488	5.42488	6085	circular	#N/A	#N/A	1
VIRSorter_EM100_T6_NODE_9_length_6077_cov_2526_44-circular	EM100_T6.NODE_9_length_6077_cov_2526.44	2526.44	6077	circular	#N/A	#N/A	1
VIRSorter_EM314_T0_NODE_20_length_6069_cov_448_848-circular	EM314_T0.NODE_20_length_6069_cov_448.848	448.848	6069	circular	Bacteroides vulgatus	#N/A	1
VIRSorter_EM231_T3_NODE_7_length_6060_cov_39_4253-circular	EM231_T3.NODE_7_length_6060_cov_39.4253	39.4253	6060	circular	#N/A	#N/A	1
VIRSorter_EM231_T3_NODE_8_length_6038_cov_18465_7-circular	EM231_T3.NODE_8_length_6038_cov_18465.7	18465.7	6038	circular	Bacteroides vulgatus	#N/A	1
VIRSorter_EM251_T3_NODE_26_length_6009_cov_10_3912-circular	EM251_T3.NODE_26_length_6009_cov_10.3912	10.3912	6009	circular	#N/A	#N/A	1
VIRSorter_EM241_T0_NODE_31_length_5995_cov_57_7692-circular	EM241_T0.NODE_31_length_5995_cov_57.7692	57.7692	5995	circular	#N/A	#N/A	1
VIRSorter_EM318_T0_NODE_72_length_5994_cov_66_5907-circular	EM318_T0.NODE_72_length_5994_cov_66.5907	66.5907	5994	Non-circular	#N/A	#N/A	1
VIRSorter_EM298_T0_NODE_73_length_5959_cov_72_8686-circular	EM298_T0.NODE_73_length_5959_cov_72.8686	72.8686	5959	circular	#N/A	#N/A	1
VIRSorter_EM235_T6_NODE_73_length_5941_cov_27_4463-circular	EM235_T6.NODE_73_length_5941_cov_27.4463	27.4463	5941	circular	#N/A	#N/A	1
VIRSorter_EM231_T3_NODE_9_length_5938_cov_371_145-circular	EM231_T3.NODE_9_length_5938_cov_371.145	371.145	5938	circular	#N/A	#N/A	1
VIRSorter_EM251_T3_NODE_27_length_5914_cov_21_0787-circular	EM251_T3.NODE_27_length_5914_cov_21.787	21.787	5914	circular	#N/A	#N/A	1
VIRSorter_EM298_T0_NODE_74_length_5914_cov_5_33111	EM298_T0.NODE_74_length_5914_cov_5.33111	5.33111	5914	circular	#N/A	#N/A	1
VIRSorter_EM219_T3_NODE_21_length_5844_cov_154_047-circular	EM219_T3.NODE_21_length_5844_cov_154.47	154.47	5844	circular	#N/A	#N/A	1
VIRSorter_EM173_T3_NODE_17_length_5843_cov_1127_09-circular	EM173_T3.NODE_17_length_5843_cov_1127.9	1127.9	5843	Non-circular	#N/A	#N/A	1
VIRSorter_EM173_T3_NODE_18_length_5819_cov_191_167-circular	EM173_T3.NODE_18_length_5819_cov_191.167	191.167	5819	circular	#N/A	#N/A	1
VIRSorter_EM318_T0_NODE_77_length_5808_cov_4_97341	EM318_T0.NODE_77_length_5808_cov_4.97341	4.97341	5808	Non-circular	#N/A	#N/A	2
VIRSorter_EM235_T6_NODE_75_length_5796_cov_12_6715-circular	EM235_T6.NODE_75_length_5796_cov_12.6715	12.6715	5796	circular	#N/A	#N/A	1
VIRSorter_EM298_T0_NODE_75_length_5787_cov_25_1347-circular	EM298_T0.NODE_75_length_5787_cov_25.1347	25.1347	5787	Non-circular	#N/A	#N/A	1
VIRSorter_EM200_T3_NODE_30_length_5737_cov_14_1795-circular	EM200_T3.NODE_30_length_5737_cov_14.1795	14.1795	5737	circular	#N/A	#N/A	1
VIRSorter_EM200_T3_NODE_32_length_5655_cov_85_878-circular	EM200_T3.NODE_32_length_5655_cov_85.878	85.878	5655	circular	#N/A	#N/A	1
VIRSorter_EM298_T0_NODE_81_length_5577_cov_5_69124	EM298_T0.NODE_81_length_5577_cov_5.69124	5.69124	5577	circular	#N/A	#N/A	1
VIRSorter_EM173_T3_NODE_21_length_5433_cov_229_197-circular	EM173_T3.NODE_21_length_5433_cov_229.197	229.197	5433	circular	#N/A	#N/A	1
VIRSorter_EM298_T0_NODE_86_length_5395_cov_15_4122-circular	EM298_T0.NODE_86_length_5395_cov_15.4122	15.4122	5395	Non-circular	#N/A	#N/A	1
VIRSorter_EM318_T0_NODE_86_length_5383_cov_15_8502-circular	EM318_T0.NODE_86_length_5383_cov_15.8502	15.8502	5383	circular	#N/A	#N/A	1
VIRSorter_EM318_T0_NODE_88_length_5369_cov_278_012-circular	EM318_T0.NODE_88_length_5369_cov_278.12	278.12	5369	circular	#N/A	#N/A	1
VIRSorter_EM200_T3_NODE_35_length_5360_cov_438_28-circular	EM200_T3.NODE_35_length_5360_cov_438.28	438.28	5360	circular	#N/A	#N/A	1
VIRSorter_EM298_T0_NODE_87_length_5346_cov_15_8118-circular	EM298_T0.NODE_87_length_5346_cov_15.8118	15.8118	5346	circular	#N/A	#N/A	1
VIRSorter_EM318_T0_NODE_90_length_5303_cov_91_4531-circular	EM318_T0.NODE_90_length_5303_cov_91.4531	91.4531	5303	circular	#N/A	#N/A	1
VIRSorter_EM298_T0_NODE_89_length_5298_cov_10_1745-circular	EM298_T0.NODE_89_length_5298_cov_10.1745	10.1745	5298	circular	#N/A	#N/A	1
VIRSorter_EM100_T6_NODE_10_length_5272_cov_7_65823	EM100_T6.NODE_10_length_5272_cov_7.65823	7.65823	5272	Non-circular	#N/A	#N/A	1
VIRSorter_EM219_T3_NODE_29_length_5265_cov_11_342-circular	EM219_T3.NODE_29_length_5265_cov_11.342	11.342	5265	circular	#N/A	#N/A	1
VIRSorter_EM298_T0_NODE_91_length_5257_cov_6_88389	EM298_T0.NODE_91_length_5257_cov_6.88389	6.88389	5257	Non-circular	#N/A	#N/A	2
VIRSorter_EM200_T3_NODE_36_length_5217_cov_326_62-circular	EM200_T3.NODE_36_length_5217_cov_326.62	326.62	5217	circular	#N/A	#N/A	1
VIRSorter_EM298_T0_NODE_93_length_5214_cov_36_2435-circular	EM298_T0.NODE_93_length_5214_cov_36.2435	36.2435	5214	circular	#N/A	#N/A	1
VIRSorter_EM173_T3_NODE_23_length_5212_cov_164_74	EM173_T3.NODE_23_length_5212_cov_164.74	164.74	5212	circular	#N/A	#N/A	1
VIRSorter_EM231_T3_NODE_12_length_5202_cov_11_7478	EM231_T3.NODE_12_length_5202_cov_11.7478	11.7478	5202	Non-circular	#N/A	#N/A	1
VIRSorter_EM219_T3_NODE_31_length_5165_cov_7_22466-circular	EM219_T3.NODE_31_length_5165_cov_7.22466	7.22466	5165	circular	#N/A	#N/A	1
VIRSorter_EM318_T0_NODE_92_length_5160_cov_4_02782	EM318_T0.NODE_92_length_5160_cov_4.2782	4.2782	5160	Non-circular	#N/A	#N/A	2
VIRSorter_EM219_T3_NODE_32_length_5157_cov_4_94316	EM219_T3.NODE_32_length_5157_cov_4.94316	4.94316	5157	circular	#N/A	#N/A	1
VIRSorter_EM173_T3_NODE_24_length_5157_cov_1450_92-circular	EM173_T3.NODE_24_length_5157_cov_1450.92	1450.92	5157	Non-circular	#N/A	#N/A	1
VIRSorter_EM173_T3_NODE_25_length_5155_cov_280_775	EM173_T3.NODE_25_length_5155_cov_280.775	280.775	5155	circular	#N/A	#N/A	1
VIRSorter_EM200_T3_NODE_38_length_5116_cov_136_257-circular	EM200_T3.NODE_38_length_5116_cov_136.257	136.257	5116	circular	#N/A	#N/A	1
VIRSorter_EM200_T3_NODE_39_length_5099_cov_866_953-circular	EM200_T3.NODE_39_length_5099_cov_866.953	866.953	5099	circular	#N/A	#N/A	1
VIRSorter_EM200_T3_NODE_40_length_5074_cov_108_958-circular	EM200_T3.NODE_40_length_5074_cov_108.958	108.958	5074	circular	#N/A	#N/A	1
VIRSorter_EM274_T0_NODE_13_length_5066_cov_8_31451-circular	EM274_T0.NODE_13_length_5066_cov_8.31451	8.31451	5066	Non-circular	#N/A	#N/A	1
VIRSorter_EM175_T0_NODE_22_length_5040_cov_3612_93-circular	EM175_T0.NODE_22_length_5040_cov_3612.93	3612.93	5040	circular	#N/A	#N/A	1
VIRSorter_EM274_T0_NODE_14_length_5037_cov_5_8322-circular	EM274_T0.NODE_14_length_5037_cov_5.8322	5.8322	5037	circular	#N/A	#N/A	1
VIRSorter_EM314_T0_NODE_22_length_5019_cov_118_269-circular	EM314_T0.NODE_22_length_5019_cov_118.269	118.269	5019	circular	#N/A	#N/A	1
VIRSorter_EM173_T3_NODE_27_length_5016_cov_1149_67-circular	EM173_T3.NODE_27_length_5016_cov_1149.67	1149.67	5016	Non-circular	#N/A	#N/A	1
VIRSorter_EM210_T0_NODE_3_length_5011_cov_40_8608-circular	EM210_T0.NODE_3_length_5011_cov_40.8608	40.8608	5011	circular	#N/A	#N/A	1
VIRSorter_EM251_T3_NODE_36_length_4999_cov_26_4511-circular	EM251_T3.NODE_36_length_4999_cov_26.4511	26.4511	4999	circular	#N/A	#N/A	1
VIRSorter_EM219_T3_NODE_34_length_4999_cov_1154_51-circular	EM219_T3.NODE_34_length_4999_cov_1154.51	1154.51	4999	Non-circular	#N/A	#N/A	1
VIRSorter_EM200_T3_NODE_42_length_4977_cov_21_0614-circular	EM200_T3.NODE_42_length_4977_cov_21.614	21.614	4977	circular	#N/A	#N/A	1
VIRSorter_EM219_T3_NODE_35_length_4962_cov_13_818-circular	EM219_T3.NODE_35_length_4962_cov_13.818	13.818	4962	circular	#N/A	#N/A	1
VIRSorter_EM235_T6_NODE_86_length_4960_cov_4_36493	EM235_T6.NODE_86_length_4960_cov_4.36493	4.36493	4960	circular	#N/A	#N/A	1
VIRSorter_EM251_T3_NODE_38_length_4960_cov_73_1339-circular	EM251_T3.NODE_38_length_4960_cov_73.1339	73.1339	4960	circular	#N/A	#N/A	1
VIRSorter_EM235_T6_NODE_87_length_4957_cov_6_51102-circular	EM235_T6.NODE_87_length_4957_cov_6.51102	6.51102	4957	Non-circular	#N/A	#N/A	1
VIRSorter_EM251_T3_NODE_39_length_4934_cov_6_38328	EM251_T3.NODE_39_length_4934_cov_6.38328	6.38328	4934	circular	#N/A	#N/A	1
VIRSorter_EM298_T0_NODE_99_length_4913_cov_8_52223-circular	EM298_T0.NODE_99_length_4913_cov_8.52223	8.52223	4913	circular	#N/A	#N/A	1
VIRSorter_EM318_T0_NODE_98_length_4899_cov_5_90793-circular	EM318_T0.NODE_98_length_4899_cov_5.90793	5.90793	4899	circular	#N/A	#N/A	1
VIRSorter_EM241_T0_NODE_36_length_4891_cov_71_7206-circular	EM241_T0.NODE_36_length_4891_cov_71.7206	71.7206	4891	circular	#N/A	#N/A	1
VIRSorter_EM173_T3_NODE_28_length_4886_cov_4_4438	EM173_T3.NODE_28_length_4886_cov_4.4438	4.4438	4886	circular	#N/A	#N/A	1
VIRSorter_EM175_T0_NODE_24_length_4883_cov_198_493-circular	EM175_T0.NODE_24_length_4883_cov_198.493	198.493	4883	circular	#N/A	#N/A	1
VIRSorter_EM219_T3_NODE_36_length_4873_cov_55_0496-circular	EM219_T3.NODE_36_length_4873_cov_55.496	55.496	4873	circular	#N/A	#N/A	1
VIRSorter_EM200_T3_NODE_43_length_4867_cov_285_103-circular	EM200_T3.NODE_43_length_4867_cov_285.103	285.103	4867	circular	#N/A	#N/A	1
VIRSorter_EM175_T0_NODE_25_length_4843_cov_5_35944-circular	EM175_T0.NODE_25_length_4843_cov_5.35944	5.35944	4843	circular	#N/A	#N/A	1
VIRSorter_EM173_T3_NODE_29_length_4825_cov_348_304-circular	EM173_T3.NODE_29_length_4825_cov_348.304	348.304	4825	Non-circular	#N/A	#N/A	1
VIRSorter_EM298_T0_NODE_101_length_4802_cov_121_591-circular	EM298_T0.NODE_101_length_4802_cov_121.591	121.591	4802	circular	#N/A	#N/A	1
VIRSorter_EM241_T0_NODE_37_length_4700_cov_14_9886	EM241_T0.NODE_37_length_4700_cov_14.9886	14.9886	4700	circular	#N/A	#N/A	1
VIRSorter_EM251_T3_NODE_42_length_4700_cov_1967_5-circular	EM251_T3.NODE_42_length_4700_cov_1967.5	1967.5	4700	Non-circular	#N/A	#N/A	1
VIRSorter_EM241_T0_NODE_38_length_4604_cov_234_987	EM241_T0.NODE_38_length_4604_cov_234.987	234.987	4604	Non-circular	#N/A	#N/A	2
VIRSorter_EM229_T3_NODE_26_length_4593_cov_7_5628	EM229_T3.NODE_26_length_4593_cov_7.5628	7.5628	4593	circular	#N/A	#N/A	1
VIRSorter_EM231_T3_NODE_14_length_4538_cov_2254_88-circular	EM231_T3.NODE_14_length_4538_cov_2254.88	2254.88	4538	Non-circular	#N/A	#N/A	1
VIRSorter_EM173_T3_NODE_32_length_4443_cov_1746_33	EM173_T3.NODE_32_length_4443_cov_1746.33	1746.33	4443	circular	#N/A	#N/A	1
VIRSorter_EM195_T0_NODE_17_length_4193_cov_3_42001	EM195_T0.NODE_17_length_4193_cov_3.42001	3.42001	4193	circular	#N/A	#N/A	1
VIRSorter_EM173_T3_NODE_33_length_4186_cov_6_03752	EM173_T3.NODE_33_length_4186_cov_6.3752	6.3752	4186	Non-circular	#N/A	#N/A	2
VIRSorter_EM219_T3_NODE_38_length_4168_cov_6_38828	EM219_T3.NODE_38_length_4168_cov_6.38828	6.38828	4168	Non-circular	#N/A	#N/A	2
VIRSorter_EM219_T3_NODE_39_length_4148_cov_3_61617	EM219_T3.NODE_39_length_4148_cov_3.61617	3.61617	4148	circular	#N/A	#N/A	1
VIRSorter_EM314_T0_NODE_27_length_3929_cov_4_1652	EM314_T0.NODE_27_length_3929_cov_4.1652	4.1652	3929	Non-circular	#N/A	#N/A	2
VIRSorter_EM173_T3_NODE_36_length_3848_cov_3_81334	EM173_T3.NODE_36_length_3848_cov_3.81334	3.81334	3848	Non-circular	#N/A	#N/A	1
VIRSorter_EM219_T3_NODE_45_length_3807_cov_1282_12	EM219_T3.NODE_45_length_3807_cov_1282.12	1282.12	3807	Non-circular	#N/A	#N/A	2
VIRSorter_EM173_T3_NODE_40_length_3716_cov_3_60666	EM173_T3.NODE_40_length_3716_cov_3.60666	3.60666	3716	Non-circular	#N/A	#N/A	1
VIRSorter_EM181_T3_NODE_11_length_3404_cov_1765_41	EM181_T3.NODE_11_length_3404_cov_1765.41	1765.41	3404	circular	#N/A	#N/A	2
VIRSorter_EM173_T3_NODE_42_length_3369_cov_5_07121	EM173_T3.NODE_42_length_3369_cov_5.7121	5.7121	3369	Non-circular	#N/A	#N/A	1
VIRSorter_EM229_T3_NODE_34_length_3103_cov_3_91273	EM229_T3.NODE_34_length_3103_cov_3.91273	3.91273	3103	Non-circular	#N/A	#N/A	1
VIRSorter_EM251_T3_NODE_63_length_3051_cov_4_22797	EM251_T3.NODE_63_length_3051_cov_4.22797	4.22797	3051	circular	#N/A	#N/A	1
VIRSorter_EM231_T3_NODE_19_length_3034_cov_8_16482	EM231_T3.NODE_19_length_3034_cov_8.16482	8.16482	3034	circular	#N/A	#N/A	1
VIRSorter_EM195_T0_NODE_27_length_2988_cov_3_9867	EM195_T0.NODE_27_length_2988_cov_3.9867	3.9867	2988	Non-circular	#N/A	#N/A	1
VIRSorter_EM314_T0_NODE_40_length_2872_cov_409_657	EM314_T0.NODE_40_length_2872_cov_409.657	409.657	2872	Non-circular	#N/A	#N/A	2
VIRSorter_EM219_T3_NODE_54_length_2856_cov_4_51089	EM219_T3.NODE_54_length_2856_cov_4.51089	4.51089	2856	Non-circular	#N/A	#N/A	2
VIRSorter_EM298_T0_NODE_159_length_2827_cov_4_90188	EM298_T0.NODE_159_length_2827_cov_4.90188	4.90188	2827	circular	#N/A	#N/A	1
VIRSorter_EM314_T0_NODE_41_length_2795_cov_255_966	EM314_T0.NODE_41_length_2795_cov_255.966	255.966	2795	circular	#N/A	#N/A	1
VIRSorter_EM314_T0_NODE_42_length_2778_cov_196_675	EM314_T0.NODE_42_length_2778_cov_196.675	196.675	2778	Non-circular	#N/A	#N/A	1
VIRSorter_EM251_T3_NODE_73_length_2719_cov_6_82057	EM251_T3.NODE_73_length_2719_cov_6.82057	6.82057	2719	Non-circular	#N/A	#N/A	1
VIRSorter_EM100_T6_NODE_22_length_2710_cov_5_28362	EM100_T6.NODE_22_length_2710_cov_5.28362	5.28362	2710	circular	#N/A	Pelotomaculum_thermopropionicum_SI_chr.trna36-GluTTC	2
VIRSorter_EM241_T0_NODE_56_length_2688_cov_5_79985	EM241_T0.NODE_56_length_2688_cov_5.79985	5.79985	2688	Non-circular	#N/A	#N/A	1
VIRSorter_EM245_T3_NODE_52_length_2629_cov_4_72844	EM245_T3.NODE_52_length_2629_cov_4.72844	4.72844	2629	circular	#N/A	#N/A	1
VIRSorter_EM195_T0_NODE_31_length_2619_cov_4_49649	EM195_T0.NODE_31_length_2619_cov_4.49649	4.49649	2619	Non-circular	#N/A	#N/A	2
VIRSorter_EM241_T0_NODE_61_length_2539_cov_4_55636	EM241_T0.NODE_61_length_2539_cov_4.55636	4.55636	2539	Non-circular	#N/A	#N/A	1
VIRSorter_EM298_T0_NODE_188_length_2412_cov_3_57658	EM298_T0.NODE_188_length_2412_cov_3.57658	3.57658	2412	Non-circular	#N/A	#N/A	1
VIRSorter_EM241_T0_NODE_64_length_2381_cov_4_55503	EM241_T0.NODE_64_length_2381_cov_4.55503	4.55503	2381	Non-circular	#N/A	#N/A	2
VIRSorter_EM231_T3_NODE_25_length_2023_cov_8_97713	EM231_T3.NODE_25_length_2023_cov_8.97713	8.97713	2023	Non-circular	#N/A	#N/A	1
VIRSorter_EM251_T3_NODE_109_length_2017_cov_5_70489	EM251_T3.NODE_109_length_2017_cov_5.70489	5.70489	2017	Non-circular	#N/A	#N/A	1
VIRSorter_EM318_T0_NODE_296_length_1681_cov_4_89483	EM318_T0.NODE_296_length_1681_cov_4.89483	4.89483	1681	Non-circular	#N/A	#N/A	2
VIRSorter_EM219_T3_NODE_139_length_1353_cov_3_92296	EM219_T3.NODE_139_length_1353_cov_3.92296	3.92296	1353	circular	#N/A	#N/A	1
