# Supplementary material for: Viral Dark Matter in the Gut Virome of Elderly Humans
Source: Preprints.org preprint supplement (doi:10.20944/preprints201807.0101.v1), 2018-07-05
Supplement: Supplementary file 5 [file Supp_Table_4_Contigs.BLAST.result.xlsx]

## Sheet: BLASTn top hits
Query	Hit	Percent ID	Alignment length	E value
EM100_T6.NODE_10_length_5272_cov_7.65823	Uncultured bacterium extrachromosomal DNA RGF00009	79.51	781	1e-150
EM100_T6.NODE_22_length_2710_cov_5.28362	Gottschalkia acidurici 9a chromosome, complete genome	95.74	47	3e-09
EM173_T3.NODE_14_length_6085_cov_5.42488	Enterococcus phage EF5, partial genome	89.53	86	1e-17
EM173_T3.NODE_24_length_5157_cov_1450.92	Gokushovirus WZ-2015a isolate 06Mk06, complete genome	77.71	628	6e-99
EM173_T3.NODE_27_length_5016_cov_1149.67	Gokushovirus WZ-2015a isolate 70Chd477, complete genome	88.45	4105	0
EM173_T3.NODE_29_length_4825_cov_348.304	Gokushovirus WZ-2015a isolate 74Chd23, complete genome	86.7	3217	0
EM173_T3.NODE_33_length_4186_cov_6.03752	Escherichia phage APCEc02, complete genome	100	4186	0
EM173_T3.NODE_36_length_3848_cov_3.81334	Escherichia phage APCEc02, complete genome	99.97	3805	0
EM173_T3.NODE_3_length_37141_cov_18.8105	Escherichia phage APCEc02, complete genome	99.99	37104	0
EM173_T3.NODE_40_length_3716_cov_3.60666	Escherichia phage APCEc02, complete genome	100	3716	0
EM173_T3.NODE_42_length_3369_cov_5.07121	Escherichia phage APCEc02, complete genome	99.65	2833	0
EM173_T3.NODE_7_length_8664_cov_7.76257	Escherichia phage APCEc02, complete genome	100	8664	0
EM173_T3.NODE_8_length_6611_cov_22.4869	Odoribacter splanchnicus strain NCTC10825 genome assembly, chromosome: 1	100	36	5e-06
EM175_T0.NODE_10_length_8730_cov_5.68715	Ruminococcus sp. SR1/5 draft genome	73.79	309	2e-21
EM175_T0.NODE_22_length_5040_cov_3612.93	Gokushovirus WZ-2015a isolate 19Fra14, complete genome	76.65	454	2e-59
EM175_T0.NODE_24_length_4883_cov_198.493	Uncultured bacterium extrachromosomal DNA RGI00327	87.85	2065	0
EM175_T0.NODE_25_length_4843_cov_5.35944	Gokushovirus WZ-2015a isolate 13Mky11, complete genome	77.06	776	1e-114
EM175_T0.NODE_3_length_84521_cov_372.977	Uncultured virus clone vSAG-92-C19 genomic sequence	78.62	159	5e-16
EM195_T0.NODE_17_length_4193_cov_3.42001	Brevibacillus phage Powder, complete genome	89.47	57	7e-08
EM195_T0.NODE_1_length_98920_cov_30.1028	Uncultured crAssphage, complete genome	97.78	31517	0
EM195_T0.NODE_27_length_2988_cov_3.9867	Gokushovirus WZ-2015a isolate 19Fra14, complete genome	78.98	785	1e-143
EM195_T0.NODE_3_length_46335_cov_10.211	Elizabethkingia miricola strain EM798-26 chromosome, complete genome	71.67	466	2e-18
EM200_T3.NODE_30_length_5737_cov_14.1795	Gokushovirus WZ-2015a isolate 45Mky19, complete genome	81.26	902	0
EM200_T3.NODE_32_length_5655_cov_85.878	Gokushovirus WZ-2015a isolate 36Fra03, complete genome	94.27	3999	0
EM200_T3.NODE_38_length_5116_cov_136.257	Gokushovirus WZ-2015a isolate 04Fra22, complete genome	89.02	2213	0
EM200_T3.NODE_39_length_5099_cov_866.953	Gokushovirus WZ-2015a isolate 03Fra061, complete genome	76.23	669	4e-90
EM200_T3.NODE_3_length_77782_cov_65.9425	Alistipes finegoldii DSM 17242, complete genome	97.7	87	6e-30
EM200_T3.NODE_40_length_5074_cov_108.958	Gokushovirus WZ-2015a isolate 10Mky22, complete genome	76.27	788	9e-107
EM200_T3.NODE_42_length_4977_cov_21.0614	Uncultured bacterium extrachromosomal DNA RGI00341	75.54	278	8e-23
EM200_T3.NODE_43_length_4867_cov_285.103	Parabacteroides phage YZ-2015b, complete genome	99.96	2627	0
EM200_T3.NODE_4_length_38745_cov_11.8082	Uncultured bacterium clone HA0AAA4ZA05RM1 genomic sequence	97.78	45	1e-08
EM210_T0.NODE_3_length_5011_cov_40.8608	Gokushovirus WZ-2015a isolate 14Ct02, complete genome	76.39	415	5e-50
EM219_T3.NODE_12_length_9528_cov_8.35543	Escherichia coli VR50, complete genome	96.43	5260	0
EM219_T3.NODE_16_length_6705_cov_5762.05	Odoribacter splanchnicus strain NCTC10825 genome assembly, chromosome: 1	100	36	5e-06
EM219_T3.NODE_18_length_6519_cov_4.35412	Uncultured bacterium extrachromosomal DNA RGI00179	84.27	2593	0
EM219_T3.NODE_29_length_5265_cov_11.342	Gokushovirus WZ-2015a isolate 06Mk06, complete genome	82.29	1683	0
EM219_T3.NODE_31_length_5165_cov_7.22466	Gokushovirus WZ-2015a isolate 19Fra14, complete genome	74.96	639	3e-67
EM219_T3.NODE_34_length_4999_cov_1154.51	Gokushovirus WZ-2015a isolate 81Fra17, complete genome	87.92	2600	0
EM219_T3.NODE_35_length_4962_cov_13.818	Gokushovirus WZ-2015a isolate 18Fx10, complete genome	76.12	649	4e-85
EM219_T3.NODE_36_length_4873_cov_55.0496	Parabacteroides phage YZ-2015b, complete genome	90	2219	0
EM219_T3.NODE_4_length_39430_cov_16.3294	Steroidobacter denitrificans strain DSM 18526, complete genome	77.84	176	2e-16
EM219_T3.NODE_6_length_30373_cov_20.8496	Escherichia coli genome assembly FHI43, scaffold scaffold-11_contig-6.0_1_293445_[organism:Escherichia	98.23	14712	0
EM229_T3.NODE_14_length_13082_cov_8.20611	Pseudodesulfovibrio indicus strain J2 chromosome, complete genome	94	50	2e-08
EM229_T3.NODE_4_length_64764_cov_18.4032	Uncultured organism clone VC1CQ64TF genomic sequence	82.58	752	0
EM229_T3.NODE_5_length_53163_cov_11.7832	Phage DP-2017a isolate CA40A hypothetical protein, tape measure, hypothetical protein, LysM, D-like protein, hypothetical protein, type IV secretion protein, baseplate, hypothetical protein, hydrolase, hypothetical protein, helicase, primase, type III restriction endonuclease, and exonuclease genes, complete cds	99.01	17383	0
EM231_T3.NODE_12_length_5202_cov_11.7478	Gokushovirus WZ-2015a isolate 12Fra21, complete genome	91.09	2200	0
EM231_T3.NODE_19_length_3034_cov_8.16482	Gokushovirus WZ-2015a isolate 81Fra17, complete genome	84.64	1341	0
EM231_T3.NODE_25_length_2023_cov_8.97713	Human gut gokushovirus isolate SH-CHD6, complete genome	85.47	2037	0
EM235_T6.NODE_1_length_99627_cov_319.279	Uncultured bacterium clone LM0ABA27ZC12FM1 genomic sequence	95.58	747	0
EM235_T6.NODE_73_length_5941_cov_27.4463	Human gokushovirus isolate SH-CHD1, complete genome	84.77	2193	0
EM235_T6.NODE_75_length_5796_cov_12.6715	Gokushovirus WZ-2015a isolate 41Mky07, complete genome	91.1	1079	0
EM235_T6.NODE_86_length_4960_cov_4.36493	Gokushovirus WZ-2015a isolate 18Fx10, complete genome	73.18	768	3e-62
EM235_T6.NODE_87_length_4957_cov_6.51102	Gokushovirus WZ-2015a isolate 18Fx10, complete genome	76.15	650	4e-85
EM241_T0.NODE_1_length_103013_cov_128.768	Uncultured bacterium extrachromosomal DNA RGI01857	100	75	2e-26
EM241_T0.NODE_21_length_7894_cov_6.85725	Brevibacillus phage Powder, complete genome	89.47	57	1e-07
EM241_T0.NODE_23_length_7097_cov_9.75376	Unidentified phage clone 1013_scaffold3125 genomic sequence	95.49	7097	0
EM241_T0.NODE_37_length_4700_cov_14.9886	Gokushovirus WZ-2015a isolate 70Chd477, complete genome	90.12	4088	0
EM241_T0.NODE_56_length_2688_cov_5.79985	Gokushovirus WZ-2015a isolate 04Fra22, complete genome	98.45	1875	0
EM241_T0.NODE_61_length_2539_cov_4.55636	Gokushovirus WZ-2015a isolate 12Fra21, complete genome	89.03	2361	0
EM241_T0.NODE_64_length_2381_cov_4.55503	Gokushovirus WZ-2015a isolate 04Fra22, complete genome	87.4	1555	0
EM245_T3.NODE_1_length_118143_cov_52.1293	Lachnoclostridium sp. YL32, complete genome	86.3	73	1e-07
EM245_T3.NODE_5_length_84927_cov_79.2973	Pongo pygmaeus genome assembly, chromosome: XII	77.93	145	2e-09
EM251_T3.NODE_109_length_2017_cov_5.70489	Human gut gokushovirus isolate SH-CHD10, complete genome	79.81	1337	0
EM251_T3.NODE_26_length_6009_cov_10.3912	Human gut gokushovirus isolate SH-CHD13, complete genome	83.8	1870	0
EM251_T3.NODE_2_length_93009_cov_46.3231	Pedobacter sp. PACM 27299, complete genome	83.87	93	7e-10
EM251_T3.NODE_36_length_4999_cov_26.4511	Gokushovirus WZ-2015a isolate 81Fra17, complete genome	88.82	2720	0
EM251_T3.NODE_38_length_4960_cov_73.1339	Gokushovirus WZ-2015a isolate 10Mky22, complete genome	77.96	794	4e-125
EM251_T3.NODE_4_length_78849_cov_53.4296	Alistipes shahii WAL 8301 draft genome	93.33	75	3e-18
EM251_T3.NODE_63_length_3051_cov_4.22797	Uncultured bacterium extrachromosomal DNA RGF00009	78.52	512	2e-86
EM251_T3.NODE_73_length_2719_cov_6.82057	Gokushovirus WZ-2015a isolate 23Fra13, complete genome	92.24	1185	0
EM274_T0.NODE_13_length_5066_cov_8.31451	Gokushovirus WZ-2015a isolate 10Mky22, complete genome	76.4	784	4e-110
EM274_T0.NODE_14_length_5037_cov_5.8322	Gokushovirus WZ-2015a isolate 70Chd477, complete genome	91.46	4100	0
EM274_T0.NODE_1_length_107962_cov_925.094	Bacteroides dorei CL03T12C01, complete genome	89.29	439	2e-149
EM274_T0.NODE_3_length_32293_cov_19.3486	Clostridium botulinum Ba4 str. 657, complete genome	77.62	210	1e-23
EM298_T0.NODE_159_length_2827_cov_4.90188	Gokushovirus WZ-2015a isolate 43Fra07, complete genome	87.07	2800	0
EM298_T0.NODE_188_length_2412_cov_3.57658	Gokushovirus WZ-2015a isolate 04Fra22, complete genome	89.53	2111	0
EM298_T0.NODE_27_length_13807_cov_6.80483	Lactobacillus sakei strain WiKim0063, complete genome	75.7	251	4e-20
EM298_T0.NODE_73_length_5959_cov_72.8686	Human gut gokushovirus isolate SH-CHD5, complete genome	87.64	1537	0
EM298_T0.NODE_75_length_5787_cov_25.1347	Gokushovirus WZ-2015a isolate 42Fra01, complete genome	75.55	634	7e-74
EM298_T0.NODE_81_length_5577_cov_5.69124	Gokushovirus WZ-2015a isolate 36Fra03, complete genome	94.04	4701	0
EM298_T0.NODE_86_length_5395_cov_15.4122	Gokushovirus WZ-2015a isolate 47Fra09, complete genome	93.49	3550	0
EM298_T0.NODE_87_length_5346_cov_15.8118	Gokushovirus WZ-2015a isolate 18Fx10, complete genome	72.49	458	2e-28
EM298_T0.NODE_89_length_5298_cov_10.1745	Gokushovirus WZ-2015a isolate 12Fra21, complete genome	80.6	1443	0
EM298_T0.NODE_8_length_51152_cov_12.8219	Mariprofundus aestuarium strain CP-5 chromosome, complete genome	84.09	88	1e-10
EM298_T0.NODE_93_length_5214_cov_36.2435	Gokushovirus WZ-2015a isolate 18Fx10, complete genome	72.61	460	6e-29
EM298_T0.NODE_9_length_46882_cov_11.5939	Uncultured bacterium clone LM0ABA27ZC12RM1 genomic sequence	85.63	682	0
EM314_T0.NODE_1_length_101602_cov_307.528	Uncultured bacterium extrachromosomal DNA RGI01857	98.67	75	7e-25
EM314_T0.NODE_22_length_5019_cov_118.269	Gokushovirus WZ-2015a isolate 18Fx10, complete genome	75.85	646	3e-81
EM314_T0.NODE_27_length_3929_cov_4.1652	Uncultured organism clone VC1CY84TR genomic sequence	100	104	5e-44
EM314_T0.NODE_6_length_26300_cov_11.8854	Hafnia alvei FB1, complete genome	83.7	362	6e-85
EM318_T0.NODE_2_length_42727_cov_18.1325	Salmonella phage UPF_BP2, complete genome	91.61	1311	0
EM318_T0.NODE_3_length_42252_cov_23.2668	Clostridiales sp. SS3/4 draft genome	77.55	5105	0
EM318_T0.NODE_50_length_7420_cov_5.96008	Uncultured bacterium clone LM0ABA41ZF07FM1 genomic sequence	81.9	746	6e-170
EM318_T0.NODE_66_length_6173_cov_6.00964	Bacteriophage phiK complete genome	85.67	3879	0
EM318_T0.NODE_72_length_5994_cov_66.5907	Gokushovirus WZ-2015a isolate 43Fra07, complete genome	85.38	3161	0
EM318_T0.NODE_86_length_5383_cov_15.8502	Gokushovirus WZ-2015a isolate 50Chd433, complete genome	80.75	1600	0
EM318_T0.NODE_88_length_5369_cov_278.012	Gokushovirus WZ-2015a isolate 13Mky11, complete genome	84.44	1028	0
EM318_T0.NODE_90_length_5303_cov_91.4531	Gokushovirus WZ-2015a isolate 12Fra21, complete genome	92.21	2554	0
EM318_T0.NODE_98_length_4899_cov_5.90793	Gokushovirus WZ-2015a isolate 81Fra17, complete genome	85.51	1746	0
EM318_T0.NODE_9_length_29056_cov_53.6699	Faecalibacterium prausnitzii strain Indica chromosome, complete genome	81.76	603	7e-135
