# Supplementary material for: Viral Dark Matter in the Gut Virome of Elderly Humans
Source: Preprints.org preprint supplement (doi:10.20944/preprints201807.0101.v1), 2018-07-05
Supplement: Supplementary file 6 [file Supp_Table_5_DemoVir.predictions.xlsx]

## Sheet: Sheet1
Sequence_ID	Order	Percent_of_votes	Family	Percent_of_votes
EM173_T3.NODE_33_length_4186_cov_6.03752	Caudovirales	100	Myoviridae	100
EM173_T3.NODE_36_length_3848_cov_3.81334	Caudovirales	100	Myoviridae	100
EM173_T3.NODE_3_length_37141_cov_18.8105	Caudovirales	100	Myoviridae	100
EM173_T3.NODE_40_length_3716_cov_3.60666	Caudovirales	100	Myoviridae	100
EM173_T3.NODE_42_length_3369_cov_5.07121	Caudovirales	100	Myoviridae	100
EM173_T3.NODE_7_length_8664_cov_7.76257	Caudovirales	100	Myoviridae	100
EM195_T0.NODE_17_length_4193_cov_3.42001	Caudovirales	100	Myoviridae	100
EM241_T0.NODE_16_length_10909_cov_7.82477	Caudovirales	100	Myoviridae	100
EM173_T3.NODE_14_length_6085_cov_5.42488	Caudovirales	100	Myoviridae	50
EM229_T3.NODE_17_length_10682_cov_9.86393	Caudovirales	100	Myoviridae	50
EM229_T3.NODE_5_length_53163_cov_11.7832	Caudovirales	100	Myoviridae	50
EM241_T0.NODE_1_length_103013_cov_128.768	Caudovirales	100	Myoviridae	50
EM241_T0.NODE_21_length_7894_cov_6.85725	Caudovirales	100	Myoviridae	50
EM241_T0.NODE_23_length_7097_cov_9.75376	Caudovirales	100	Myoviridae	50
EM245_T3.NODE_5_length_84927_cov_79.2973	Caudovirales	100	Myoviridae	50
EM314_T0.NODE_1_length_101602_cov_307.528	Caudovirales	100	Myoviridae	50
EM298_T0.NODE_5_length_81480_cov_43.5962	Caudovirales	100	Myoviridae	47.8261
EM235_T6.NODE_2_length_50063_cov_151.402	Caudovirales	100	Myoviridae	47.5
EM274_T0.NODE_2_length_48348_cov_21.2684	Caudovirales	100	Myoviridae	47.3684
EM175_T0.NODE_4_length_50494_cov_102.298	Caudovirales	100	Myoviridae	47.2222
EM318_T0.NODE_2_length_42727_cov_18.1325	Caudovirales	100	Myoviridae	44.4444
EM195_T0.NODE_3_length_46335_cov_10.211	Caudovirales	100	Myoviridae	42.8571
EM173_T3.NODE_28_length_4886_cov_4.4438	Caudovirales	100	Podoviridae	100
EM219_T3.NODE_32_length_5157_cov_4.94316	Caudovirales	100	Podoviridae	100
EM219_T3.NODE_6_length_30373_cov_20.8496	Caudovirales	100	Podoviridae	100
EM219_T3.NODE_12_length_9528_cov_8.35543	Caudovirales	100	Podoviridae	50
EM229_T3.NODE_4_length_64764_cov_18.4032	Caudovirales	100	Podoviridae	45.4545
EM241_T0.NODE_10_length_15718_cov_6.6396	Caudovirales	100	Podoviridae	42.8571
EM100_T6.NODE_22_length_2710_cov_5.28362	Caudovirales	100	Siphoviridae	100
EM219_T3.NODE_39_length_4148_cov_3.61617	Caudovirales	100	Siphoviridae	100
EM219_T3.NODE_54_length_2856_cov_4.51089	Caudovirales	100	Siphoviridae	100
EM318_T0.NODE_296_length_1681_cov_4.89483	Caudovirales	100	Siphoviridae	100
EM318_T0.NODE_50_length_7420_cov_5.96008	Caudovirales	100	Siphoviridae	100
EM318_T0.NODE_77_length_5808_cov_4.97341	Caudovirales	100	Siphoviridae	100
EM318_T0.NODE_92_length_5160_cov_4.02782	Caudovirales	100	Siphoviridae	100
EM298_T0.NODE_10_length_40025_cov_35.5554	Caudovirales	100	Siphoviridae	90
EM318_T0.NODE_6_length_33839_cov_8.3285	Caudovirales	100	Siphoviridae	89.2857
EM298_T0.NODE_14_length_22200_cov_18.0131	Caudovirales	100	Siphoviridae	86.6667
EM318_T0.NODE_1_length_84326_cov_47.8923	Caudovirales	100	Siphoviridae	85.7143
EM219_T3.NODE_10_length_10976_cov_7.18185	Caudovirales	100	Siphoviridae	83.3333
EM241_T0.NODE_19_length_9818_cov_8.99027	Caudovirales	100	Siphoviridae	78.5714
EM195_T0.NODE_11_length_6177_cov_5.50523	Caudovirales	100	Siphoviridae	75
EM195_T0.NODE_31_length_2619_cov_4.49649	Caudovirales	100	Siphoviridae	75
EM235_T6.NODE_7_length_26697_cov_9.5971	Caudovirales	100	Siphoviridae	75
EM318_T0.NODE_9_length_29056_cov_53.6699	Caudovirales	100	Siphoviridae	73.3333
EM229_T3.NODE_14_length_13082_cov_8.20611	Caudovirales	100	Siphoviridae	71.4286
EM318_T0.NODE_3_length_42252_cov_23.2668	Caudovirales	100	Siphoviridae	71.4286
EM274_T0.NODE_3_length_32293_cov_19.3486	Caudovirales	100	Siphoviridae	66.6667
EM298_T0.NODE_8_length_51152_cov_12.8219	Caudovirales	100	Siphoviridae	65.3846
EM314_T0.NODE_6_length_26300_cov_11.8854	Caudovirales	100	Siphoviridae	64.7059
EM200_T3.NODE_4_length_38745_cov_11.8082	Caudovirales	100	Siphoviridae	62.5
EM298_T0.NODE_27_length_13807_cov_6.80483	Caudovirales	100	Siphoviridae	58.3333
EM314_T0.NODE_4_length_41356_cov_14.5302	Caudovirales	100	Siphoviridae	54.5455
EM298_T0.NODE_91_length_5257_cov_6.88389	Caudovirales	100	Siphoviridae	50
EM235_T6.NODE_34_length_9857_cov_25.9766	Caudovirales	100	Unassigned	NA
EM251_T3.NODE_11_length_12732_cov_6.85738	Caudovirales	100	Unassigned	NA
EM314_T0.NODE_27_length_3929_cov_4.1652	Caudovirales	100	Unassigned	NA
EM219_T3.NODE_139_length_1353_cov_3.92296	Caudovirales	100	Unassigned	100
EM219_T3.NODE_38_length_4168_cov_6.38828	Caudovirales	100	Unassigned	100
EM229_T3.NODE_34_length_3103_cov_3.91273	Caudovirales	100	Unassigned	100
EM200_T3.NODE_3_length_77782_cov_65.9425	Caudovirales	50	Myoviridae	48.2759
EM175_T0.NODE_10_length_8730_cov_5.68715	Caudovirales	50	Myoviridae	45.4545
EM219_T3.NODE_4_length_39430_cov_16.3294	Caudovirales	50	Myoviridae	42.4242
EM200_T3.NODE_1_length_95266_cov_17.3235	Caudovirales	50	Myoviridae	33.3333
EM251_T3.NODE_2_length_93009_cov_46.3231	Caudovirales	50	Myoviridae	33.3333
EM318_T0.NODE_12_length_23955_cov_3614.23	Caudovirales	50	Podoviridae	40
EM245_T3.NODE_3_length_98041_cov_58.6819	Caudovirales	50	Podoviridae	33.3333
EM298_T0.NODE_9_length_46882_cov_11.5939	Caudovirales	50	Podoviridae	33.3333
EM274_T0.NODE_1_length_107962_cov_925.094	Caudovirales	50	Siphoviridae	59.0909
EM181_T3.NODE_2_length_58555_cov_110.392	Caudovirales	50	Siphoviridae	40
EM245_T3.NODE_1_length_118143_cov_52.1293	Caudovirales	49.2063	Siphoviridae	50
EM229_T3.NODE_1_length_98245_cov_40.5335	Caudovirales	48.8889	Podoviridae	75
EM229_T3.NODE_2_length_85728_cov_25.2924	Caudovirales	48.7179	Myoviridae	44.4444
EM175_T0.NODE_2_length_85426_cov_54.412	Caudovirales	48.5714	Myoviridae	44.8276
EM251_T3.NODE_4_length_78849_cov_53.4296	Caudovirales	48.1481	Myoviridae	45.8333
EM175_T0.NODE_3_length_84521_cov_372.977	Caudovirales	47.2222	Myoviridae	44.8276
EM235_T6.NODE_1_length_99627_cov_319.279	Caudovirales	47.0588	Myoviridae	30
EM195_T0.NODE_1_length_98920_cov_30.1028	Caudovirales	46.6667	Siphoviridae	44.4444
EM245_T3.NODE_6_length_83378_cov_234.054	Caudovirales	46.4286	Myoviridae	43.4783
EM100_T6.NODE_10_length_5272_cov_7.65823	no_order_Microviridae	100	Microviridae	100
EM100_T6.NODE_6_length_6223_cov_11089.9	no_order_Microviridae	100	Microviridae	100
EM173_T3.NODE_11_length_6420_cov_9990.05	no_order_Microviridae	100	Microviridae	100
EM173_T3.NODE_12_length_6310_cov_15.8342	no_order_Microviridae	100	Microviridae	100
EM173_T3.NODE_13_length_6120_cov_2571.09	no_order_Microviridae	100	Microviridae	100
EM173_T3.NODE_23_length_5212_cov_164.74	no_order_Microviridae	100	Microviridae	100
EM173_T3.NODE_24_length_5157_cov_1450.92	no_order_Microviridae	100	Microviridae	100
EM173_T3.NODE_25_length_5155_cov_280.775	no_order_Microviridae	100	Microviridae	100
EM173_T3.NODE_27_length_5016_cov_1149.67	no_order_Microviridae	100	Microviridae	100
EM173_T3.NODE_29_length_4825_cov_348.304	no_order_Microviridae	100	Microviridae	100
EM173_T3.NODE_32_length_4443_cov_1746.33	no_order_Microviridae	100	Microviridae	100
EM173_T3.NODE_8_length_6611_cov_22.4869	no_order_Microviridae	100	Microviridae	100
EM175_T0.NODE_13_length_6672_cov_10.5004	no_order_Microviridae	100	Microviridae	100
EM175_T0.NODE_15_length_6463_cov_117.537	no_order_Microviridae	100	Microviridae	100
EM175_T0.NODE_16_length_6434_cov_115.45	no_order_Microviridae	100	Microviridae	100
EM175_T0.NODE_18_length_6161_cov_1419.17	no_order_Microviridae	100	Microviridae	100
EM175_T0.NODE_22_length_5040_cov_3612.93	no_order_Microviridae	100	Microviridae	100
EM175_T0.NODE_24_length_4883_cov_198.493	no_order_Microviridae	100	Microviridae	100
EM175_T0.NODE_25_length_4843_cov_5.35944	no_order_Microviridae	100	Microviridae	100
EM181_T3.NODE_11_length_3404_cov_1765.41	no_order_Microviridae	100	Microviridae	100
EM195_T0.NODE_10_length_6322_cov_1191.84	no_order_Microviridae	100	Microviridae	100
EM195_T0.NODE_27_length_2988_cov_3.9867	no_order_Microviridae	100	Microviridae	100
EM198_T6.NODE_7_length_6491_cov_11130.5	no_order_Microviridae	100	Microviridae	100
EM200_T3.NODE_24_length_6740_cov_2592.41	no_order_Microviridae	100	Microviridae	100
EM200_T3.NODE_30_length_5737_cov_14.1795	no_order_Microviridae	100	Microviridae	100
EM200_T3.NODE_32_length_5655_cov_85.878	no_order_Microviridae	100	Microviridae	100
EM200_T3.NODE_35_length_5360_cov_438.28	no_order_Microviridae	100	Microviridae	100
EM200_T3.NODE_36_length_5217_cov_326.62	no_order_Microviridae	100	Microviridae	100
EM200_T3.NODE_38_length_5116_cov_136.257	no_order_Microviridae	100	Microviridae	100
EM200_T3.NODE_39_length_5099_cov_866.953	no_order_Microviridae	100	Microviridae	100
EM200_T3.NODE_40_length_5074_cov_108.958	no_order_Microviridae	100	Microviridae	100
EM200_T3.NODE_42_length_4977_cov_21.0614	no_order_Microviridae	100	Microviridae	100
EM200_T3.NODE_43_length_4867_cov_285.103	no_order_Microviridae	100	Microviridae	100
EM210_T0.NODE_3_length_5011_cov_40.8608	no_order_Microviridae	100	Microviridae	100
EM219_T3.NODE_16_length_6705_cov_5762.05	no_order_Microviridae	100	Microviridae	100
EM219_T3.NODE_17_length_6686_cov_117.082	no_order_Microviridae	100	Microviridae	100
EM219_T3.NODE_18_length_6519_cov_4.35412	no_order_Microviridae	100	Microviridae	100
EM219_T3.NODE_19_length_6355_cov_2239.88	no_order_Microviridae	100	Microviridae	100
EM219_T3.NODE_29_length_5265_cov_11.342	no_order_Microviridae	100	Microviridae	100
EM219_T3.NODE_31_length_5165_cov_7.22466	no_order_Microviridae	100	Microviridae	100
EM219_T3.NODE_34_length_4999_cov_1154.51	no_order_Microviridae	100	Microviridae	100
EM219_T3.NODE_35_length_4962_cov_13.818	no_order_Microviridae	100	Microviridae	100
EM219_T3.NODE_36_length_4873_cov_55.0496	no_order_Microviridae	100	Microviridae	100
EM229_T3.NODE_23_length_6537_cov_49.5005	no_order_Microviridae	100	Microviridae	100
EM229_T3.NODE_26_length_4593_cov_7.5628	no_order_Microviridae	100	Microviridae	100
EM231_T3.NODE_12_length_5202_cov_11.7478	no_order_Microviridae	100	Microviridae	100
EM231_T3.NODE_14_length_4538_cov_2254.88	no_order_Microviridae	100	Microviridae	100
EM231_T3.NODE_19_length_3034_cov_8.16482	no_order_Microviridae	100	Microviridae	100
EM231_T3.NODE_25_length_2023_cov_8.97713	no_order_Microviridae	100	Microviridae	100
EM231_T3.NODE_4_length_6590_cov_22.1663	no_order_Microviridae	100	Microviridae	100
EM231_T3.NODE_5_length_6456_cov_630.198	no_order_Microviridae	100	Microviridae	100
EM231_T3.NODE_6_length_6314_cov_9.47979	no_order_Microviridae	100	Microviridae	100
EM231_T3.NODE_9_length_5938_cov_371.145	no_order_Microviridae	100	Microviridae	100
EM235_T6.NODE_65_length_6317_cov_863.389	no_order_Microviridae	100	Microviridae	100
EM235_T6.NODE_73_length_5941_cov_27.4463	no_order_Microviridae	100	Microviridae	100
EM235_T6.NODE_75_length_5796_cov_12.6715	no_order_Microviridae	100	Microviridae	100
EM235_T6.NODE_86_length_4960_cov_4.36493	no_order_Microviridae	100	Microviridae	100
EM235_T6.NODE_87_length_4957_cov_6.51102	no_order_Microviridae	100	Microviridae	100
EM241_T0.NODE_24_length_6578_cov_71.0371	no_order_Microviridae	100	Microviridae	100
EM241_T0.NODE_27_length_6217_cov_11.2579	no_order_Microviridae	100	Microviridae	100
EM241_T0.NODE_36_length_4891_cov_71.7206	no_order_Microviridae	100	Microviridae	100
EM241_T0.NODE_37_length_4700_cov_14.9886	no_order_Microviridae	100	Microviridae	100
EM241_T0.NODE_56_length_2688_cov_5.79985	no_order_Microviridae	100	Microviridae	100
EM241_T0.NODE_61_length_2539_cov_4.55636	no_order_Microviridae	100	Microviridae	100
EM241_T0.NODE_64_length_2381_cov_4.55503	no_order_Microviridae	100	Microviridae	100
EM251_T3.NODE_109_length_2017_cov_5.70489	no_order_Microviridae	100	Microviridae	100
EM251_T3.NODE_21_length_6511_cov_26.9094	no_order_Microviridae	100	Microviridae	100
EM251_T3.NODE_22_length_6477_cov_19.6204	no_order_Microviridae	100	Microviridae	100
EM251_T3.NODE_24_length_6274_cov_30.483	no_order_Microviridae	100	Microviridae	100
EM251_T3.NODE_26_length_6009_cov_10.3912	no_order_Microviridae	100	Microviridae	100
EM251_T3.NODE_36_length_4999_cov_26.4511	no_order_Microviridae	100	Microviridae	100
EM251_T3.NODE_38_length_4960_cov_73.1339	no_order_Microviridae	100	Microviridae	100
EM251_T3.NODE_42_length_4700_cov_1967.5	no_order_Microviridae	100	Microviridae	100
EM251_T3.NODE_63_length_3051_cov_4.22797	no_order_Microviridae	100	Microviridae	100
EM251_T3.NODE_73_length_2719_cov_6.82057	no_order_Microviridae	100	Microviridae	100
EM274_T0.NODE_13_length_5066_cov_8.31451	no_order_Microviridae	100	Microviridae	100
EM274_T0.NODE_14_length_5037_cov_5.8322	no_order_Microviridae	100	Microviridae	100
EM298_T0.NODE_101_length_4802_cov_121.591	no_order_Microviridae	100	Microviridae	100
EM298_T0.NODE_159_length_2827_cov_4.90188	no_order_Microviridae	100	Microviridae	100
EM298_T0.NODE_188_length_2412_cov_3.57658	no_order_Microviridae	100	Microviridae	100
EM298_T0.NODE_32_length_11313_cov_25.9245	no_order_Microviridae	100	Microviridae	100
EM298_T0.NODE_58_length_6729_cov_464.107	no_order_Microviridae	100	Microviridae	100
EM298_T0.NODE_62_length_6612_cov_95.9266	no_order_Microviridae	100	Microviridae	100
EM298_T0.NODE_73_length_5959_cov_72.8686	no_order_Microviridae	100	Microviridae	100
EM298_T0.NODE_74_length_5914_cov_5.33111	no_order_Microviridae	100	Microviridae	100
EM298_T0.NODE_75_length_5787_cov_25.1347	no_order_Microviridae	100	Microviridae	100
EM298_T0.NODE_81_length_5577_cov_5.69124	no_order_Microviridae	100	Microviridae	100
EM298_T0.NODE_86_length_5395_cov_15.4122	no_order_Microviridae	100	Microviridae	100
EM298_T0.NODE_87_length_5346_cov_15.8118	no_order_Microviridae	100	Microviridae	100
EM298_T0.NODE_89_length_5298_cov_10.1745	no_order_Microviridae	100	Microviridae	100
EM298_T0.NODE_93_length_5214_cov_36.2435	no_order_Microviridae	100	Microviridae	100
EM298_T0.NODE_99_length_4913_cov_8.52223	no_order_Microviridae	100	Microviridae	100
EM314_T0.NODE_17_length_6425_cov_656.027	no_order_Microviridae	100	Microviridae	100
EM314_T0.NODE_22_length_5019_cov_118.269	no_order_Microviridae	100	Microviridae	100
EM318_T0.NODE_57_length_6655_cov_1239.45	no_order_Microviridae	100	Microviridae	100
EM318_T0.NODE_60_length_6411_cov_62.6963	no_order_Microviridae	100	Microviridae	100
EM318_T0.NODE_61_length_6399_cov_541.824	no_order_Microviridae	100	Microviridae	100
EM318_T0.NODE_62_length_6337_cov_19.6493	no_order_Microviridae	100	Microviridae	100
EM318_T0.NODE_65_length_6201_cov_120.388	no_order_Microviridae	100	Microviridae	100
EM318_T0.NODE_66_length_6173_cov_6.00964	no_order_Microviridae	100	Microviridae	100
EM318_T0.NODE_72_length_5994_cov_66.5907	no_order_Microviridae	100	Microviridae	100
EM318_T0.NODE_86_length_5383_cov_15.8502	no_order_Microviridae	100	Microviridae	100
EM318_T0.NODE_88_length_5369_cov_278.012	no_order_Microviridae	100	Microviridae	100
EM318_T0.NODE_90_length_5303_cov_91.4531	no_order_Microviridae	100	Microviridae	100
EM318_T0.NODE_98_length_4899_cov_5.90793	no_order_Microviridae	100	Microviridae	100
EM100_T6.NODE_9_length_6077_cov_2526.44	Unassigned	100	Unassigned	100
EM173_T3.NODE_17_length_5843_cov_1127.09	Unassigned	100	Unassigned	100
EM173_T3.NODE_18_length_5819_cov_191.167	Unassigned	100	Unassigned	100
EM173_T3.NODE_21_length_5433_cov_229.197	Unassigned	100	Unassigned	100
EM175_T0.NODE_19_length_6134_cov_6393.87	Unassigned	100	Unassigned	100
EM219_T3.NODE_21_length_5844_cov_154.047	Unassigned	100	Unassigned	100
EM231_T3.NODE_7_length_6060_cov_39.4253	Unassigned	100	Unassigned	100
EM241_T0.NODE_31_length_5995_cov_57.7692	Unassigned	100	Unassigned	100
EM245_T3.NODE_28_length_6181_cov_21.563	Unassigned	100	Unassigned	100
EM251_T3.NODE_27_length_5914_cov_21.0787	Unassigned	100	Unassigned	100
EM298_T0.NODE_70_length_6089_cov_8.3346	Unassigned	100	Unassigned	100
EM314_T0.NODE_20_length_6069_cov_448.848	Unassigned	100	Unassigned	100
EM314_T0.NODE_41_length_2795_cov_255.966	Unassigned	100	Unassigned	100
EM314_T0.NODE_42_length_2778_cov_196.675	Unassigned	100	Unassigned	100
EM318_T0.NODE_67_length_6169_cov_1269.72	Unassigned	100	Unassigned	100
