# Supplementary material for: Viral Dark Matter in the Gut Virome of Elderly Humans
Source: Preprints.org preprint supplement (doi:10.20944/preprints201807.0101.v1), 2018-07-05
Supplement: Supplementary file 7 [file Supp_Table_6_Phage.DB.xlsx]

## Sheet: Sheet1
Phage_Accession	Phage_Fasta_Decription
NC_001341.1	Acholeplasma phage MV-L1, complete genome
KP202970.1	Achromobacter phage 83-24, complete genome. [26-MAY-2017]
KF787095.1	Achromobacter phage JWAlpha, complete genome. [26-MAY-2017]
KP202971.1	Achromobacter phage JWF, complete genome. [26-MAY-2017]
KP202969.1	Achromobacter phage JWX, complete genome. [26-MAY-2017]
KP313532.2	Achromobacter phage phiAxp-1, complete genome
KT321316.2	Achromobacter phage phiAxp-2, complete genome
KT321317.2	Achromobacter phage phiAxp-3, complete genome
KP282674.1	Acidianus bottle-shaped virus 3 strain ABV3, complete genome
EF432053.1	Acidianus bottle-shaped virus, complete genome
AJ854042.1	Acidianus filamentous virus 2, partial genome
AM087120.2	Acidianus filamentous virus 3, partial viral genome
AM087121.2	Acidianus filamentous virus 6, partial viral genome
AM087123.2	Acidianus filamentous virus 8, partial viral genome
EU545650.1	Acidianus filamentous virus 9, complete genome
AJ567472.1	Acidianus filamentus virus 1 complete genome
AJ875026.1	Acidianus rod-shaped virus 1, complete viral genome
KP282675.1	Acidianus rod-shaped virus 2 strain ARV2, complete genome
FJ870917.1	Acidianus spindle-shaped virus 1, complete genome
KU645528.1	Acidianus tailed spindle virus isolate 1, complete genome
AJ888457.1	Acidianus two-tailed virus, complete viral genome
HE806280.1	Acinetobacter bacteriophage AP22, complete genome [25-AUG-2017]
HM114315.1	Acinetobacter phage 133, complete genome. [25-AUG-2017]
HM368260.1	Acinetobacter phage AB1, complete genome. [26-MAY-2017]
KT588075.2	Acinetobacter phage Ab105-2phi, complete genome
KT588073.1	Acinetobacter phage Ab105-3phi, partial genome
KC311669.1	Acinetobacter phage AB3, complete genome. [26-MAY-2017]
JX658790.1	Acinetobacter phage Abp1, complete genome. [26-MAY-2017]
HM032710.1	Acinetobacter phage Ac42, complete genome. [25-AUG-2017]
GU911519.1	Acinetobacter phage Acj61, complete genome. [25-AUG-2017]
HM004124.1	Acinetobacter phage Acj9, complete genome. [25-AUG-2017]
KR149290.1	Acinetobacter phage Fri1, complete genome
KF811200.1	Acinetobacter phage IME_AB3, complete genome. [26-MAY-2017]
KT804908.2	Acinetobacter phage IME200, complete genome
JX976549.1	Acinetobacter phage IME-AB2, complete genome. [25-AUG-2017]
KU510289.1	Acinetobacter phage LZ35, complete genome
HQ186308.1	Acinetobacter phage phiAB1, complete genome. [26-MAY-2017]
KT339321.1	Acinetobacter phage phiAB6, complete genome
JX560521.1	Acinetobacter phage phiAC-1, complete genome. [25-AUG-2017]
KF669658.1	Acinetobacter phage Presley, complete genome. [26-MAY-2017]
KJ473422.1	Acinetobacter phage vB_AbaM_Acibel004, complete genome. [25-AUG-2017]
KU935715.1	Acinetobacter phage vB_AbaM_ME3, complete genome
KJ628499.1	Acinetobacter phage vB_AbaM_phiAbaA1, complete genome
KJ473423.1	Acinetobacter phage vB_AbaP_Acibel007, complete genome. [26-MAY-2017]
KT388102.1	Acinetobacter phage vB_AbaP_PD-6A3, complete genome
KX268652.1	Acinetobacter phage vB_AbaS_TRS1, complete genome
JX403940.1	Acinetobacter phage YMC/09/02/B1251_ABA_BP, complete genome. [25-AUG-2017]
KP861230.1	Acinetobacter phage YMC11/11/R3177, complete genome
KP861231.1	Acinetobacter phage YMC11/12/R1215, complete genome
KP861229.1	Acinetobacter phage YMC11/12/R2315, complete genome
KM672662.1	Acinetobacter phage YMC13/03/R2096, complete genome. [25-AUG-2017]
KJ817802.1	Acinetobacter phage YMC-13-01-C62, complete genome. [25-AUG-2017]
HQ698922.4	Acinetobacter phage ZZ1, complete genome
L48605.1	acteriophage c2 complete genome. [25-AUG-2017]
L13696.1	acteriophage L2 (from Mycoplasma), complete genome. [26-MAY-2017]
DQ123818.2	Actinomyces phage Av-1, complete genome
AY576796.1	Actinoplanes phage phiAsp2, complete genome. [26-MAY-2017]
L33769.1	actococcus phage bIL67, complete genome. [25-AUG-2017]
AF157835.1	Acyrthosiphon pisum bacteriophage APSE-1, complete genome. [25-AUG-2017]
AE002163.1	AE002163 Chlamydia phage phiCPAR39, complete sequence. [26-MAY-2017]
AY962392.1	Aeromonas phage 31, complete genome. [25-AUG-2017]
KY290948.1	Aeromonas phage 44RR2.8t.2, complete genome
KY290955.1	Aeromonas phage 65.2, complete genome
JN377895.1	Aeromonas phage Aes012, complete genome. [25-AUG-2017]
JN377894.1	Aeromonas phage Aes508, complete genome. [25-AUG-2017]
MF498774.1	Aeromonas phage AS-yj, partial genome
JX123262.1	Aeromonas phage CC2, complete genome. [25-AUG-2017]
KJ858521.1	Aeromonas phage pAh6-C, complete genome. [25-AUG-2017]
HM452125.1	Aeromonas phage phiAS4, complete genome. [25-AUG-2017]
HM452126.1	Aeromonas phage phiAS5, complete genome. [25-AUG-2017]
JN651747.1	Aeromonas phage phiAS7, complete genome. [26-MAY-2017]
DQ674738.2	Aeromonas phage phiO18P, complete genome. [25-AUG-2017]
JF974294.1	Aeromonas phage pIS4-A genomic sequence
GU396103.1	Aeromonas phage PX29, complete genome. [25-AUG-2017]
JQ177063.1	Aeromonas phage vB_AsaM-56, complete genome. [25-AUG-2017]
DQ529280.1	Aeromonas salmonicida bacteriophage 25, complete genome. [25-AUG-2017]
LC208019.1	Aeropyrum globular virus 1 genomic DNA, complete genome
GQ866233.1	Aggregatibacter phage S1249, complete sequence
JQ312117.1	Agrobacterium phage 7-7-1, complete genome. [25-AUG-2017]
AF155037.1	Alteromonas phage PM2, complete genome. [28-FEB-2015]
KF005317.1	Alteromonas phage vB_AmaP_AD45-P1, complete genome
KF005320.1	Alteromonas phage vB_AmaP_AD45-P2, complete genome. [26-MAY-2017]
KF005318.1	Alteromonas phage vB_AmaP_AD45-P3, complete genome. [26-MAY-2017]
KF005319.1	Alteromonas phage vB_AmaP_AD45-P4, complete genome. [26-MAY-2017]
KF356198.1	Anabaena phage A-4L, complete genome. [26-MAY-2017]
AM419438.1	Archaeal BJ1 virus complete genome
MF668266.1	Arthrobacter phage Adat, complete genome
KU160639.1	Arthrobacter phage Anansi, complete genome
KU647629.1	Arthrobacter phage BarretLemon, complete genome
KX522650.1	Arthrobacter Phage Conboy, complete genome
KT355471.1	Arthrobacter phage Decurro, complete genome
KX855961.1	Arthrobacter phage EdgarPoe, complete genome
KU160647.1	Arthrobacter phage Gorgeous, complete genome
KU647626.1	Arthrobacter phage KellEzio, complete genome
KU647627.1	Arthrobacter phage Kitkat, complete genome
KU647628.2	Arthrobacter phage Mudcat, complete genome
MF668279.1	Arthrobacter phage Nellie, complete genome
KU160666.1	Arthrobacter phage SorJuana, complete genome
KF692088.2	Arthrobacter phage vB_ArS-ArV2, complete genome. [26-MAY-2017]
KM879463.1	Arthrobacter phage vB_ArtM-ArV1, complete genome. [26-MAY-2017]
AB967974.1	Aurantimonas phage AmM-1 DNA, complete sequence
DQ150593.1	Bacillus anthracis bacteriophage Fah, complete sequence. [25-AUG-2017]
DQ222851.1	Bacillus anthracis phage Cherry, complete genome. [25-AUG-2017]
DQ222853.1	Bacillus anthracis phage Gamma isolate 51, complete genome. [25-AUG-2017]
DQ222855.1	Bacillus anthracis phage Gamma isolate 53, complete genome. [25-AUG-2017]
DQ289556.1	Bacillus anthracis phage Gamma isolate d'Herelle, complete genome. [25-AUG-2017]
DQ289555.1	Bacillus anthracis phage W Beta, complete genome. [25-AUG-2017]
JX094431.1	Bacillus cereus bacteriophage vB_BceM_Bc431v3, complete genome. [25-AUG-2017]
AY616446.1	Bacillus clarkii bacteriophage BCJA1c, complete genome. [25-AUG-2017]
EF583821.1	Bacillus phage 0305phi8-36, complete genome. [25-AUG-2017]
GU229986.1	Bacillus phage 250, complete genome. [25-AUG-2017]
KC330684.1	Bacillus phage Andromeda, complete genome. [25-AUG-2017]
EU408779.1	Bacillus phage AP50, complete genome. [25-AUG-2017]
KU878088.1	Bacillus phage AR9, complete genome
KX349899.1	Bacillus phage Aurora, complete genome
KT307976.1	Bacillus phage AvesoBmore, complete genome
NC_004165.1	Bacillus phage B103, complete genome
JN790865.1	Bacillus phage B4, complete genome. [25-AUG-2017]
JN797796.1	Bacillus phage B5S, complete genome. [25-AUG-2017]
KP063902.1	Bacillus phage BalMu-1 copy 1, complete genome
JF966203.1	Bacillus phage Bastille, complete genome. [25-AUG-2017]
JN712910.1	Bacillus phage BCD7, complete genome. [25-AUG-2017]
HE614282.1	Bacillus phage BceA1 complete genome [26-MAY-2017]
KJ451625.1	Bacillus phage Bcp1, complete genome. [25-AUG-2017]
JN797797.1	Bacillus phage BCP78, complete genome. [25-AUG-2017]
KJ081346.1	Bacillus phage BCP8-2, complete genome. [25-AUG-2017]
JN797798.1	Bacillus phage BCU4, complete genome. [25-AUG-2017]
KX147229.1	Bacillus phage Belinda, complete genome
KF669647.1	Bacillus phage BigBertha, complete genome. [25-AUG-2017]
KF669648.1	Bacillus phage Blastoid, complete genome. [25-AUG-2017]
KT995479.1	Bacillus phage BM5, complete genome
KX190834.1	Bacillus phage BMBtpLA3, complete genome
KM051843.1	Bacillus phage Bobb, complete genome. [25-AUG-2017]
KJ010547.1	Bacillus phage Bp8p-C, complete genome. [26-MAY-2017]
KC430106.1	Bacillus phage BPS10C, complete genome. [25-AUG-2017]
JN654439.1	Bacillus phage BPS13, complete genome. [25-AUG-2017]
JN191664.1	Bacillus phage BtCS33, complete genome. [26-MAY-2017]
MG710484.1	Bacillus phage BtiUFT6.51-F, complete genome
MF288918.1	Bacillus phage Bubs, complete genome
KJ489397.1	Bacillus phage CAM003, complete genome. [25-AUG-2017]
KF669649.1	Bacillus phage CampHawk, complete genome. [25-AUG-2017]
KX349900.1	Bacillus phage Claudi, complete genome
KF554508.2	Bacillus phage CP-51, complete genome. [25-AUG-2017]
KC330679.1	Bacillus phage Curly, complete genome. [25-AUG-2017]
KU577463.1	Bacillus phage Deep Blue, complete genome
KU737349.1	Bacillus phage DIGNKC, complete genome
KX349903.1	Bacillus phage DirtyBetty, complete genome
KU253712.1	Bacillus phage Eldridge, complete genome
KC330680.1	Bacillus phage Eoghan, complete genome. [25-AUG-2017]
KJ489398.1	Bacillus phage Evoli, complete genome. [25-AUG-2017]
KT207918.1	Bacillus phage Eyuki, complete genome
KC330683.1	Bacillus phage Finn, complete genome. [25-AUG-2017]
JN638751.1	Bacillus phage G, complete genome. [25-AUG-2017]
NC_002649.1	Bacillus phage GA-1, complete genome
KC330681.1	Bacillus phage Gemini, complete genome. [25-AUG-2017]
KF669651.1	Bacillus phage Glittering, complete genome. [25-AUG-2017]
KF669652.1	Bacillus phage Grass, complete genome. [26-MAY-2017]
KJ489399.1	Bacillus phage Hakuna, complete genome. [25-AUG-2017]
KJ489400.1	Bacillus phage Hoody T, complete genome. [25-AUG-2017]
KJ676859.1	Bacillus phage JBP901, complete genome. [25-AUG-2017]
KC595512.2	Bacillus phage JL, complete genome. [25-AUG-2017]
KX349902.1	Bacillus phage Kida, complete genome
MG727696.1	Bacillus phage Kiel007, complete genome
KM236245.1	Bacillus phage Mater, complete genome. [25-AUG-2017]
KJ489401.1	Bacillus phage Megatron, complete genome. [25-AUG-2017]
KC685370.1	Bacillus phage MG-B1, complete genome. [26-MAY-2017]
KM236246.1	Bacillus phage Moonbeam, complete genome. [25-AUG-2017]
KU737352.1	Bacillus phage Nemo, complete genome
KU737344.1	Bacillus phage Nigalana, complete genome
KU737351.1	Bacillus phage NotTheCreek, complete genome
MG727699.1	Bacillus phage Pagassa, complete genome
KF669655.1	Bacillus phage Page, complete genome. [25-AUG-2017]
KP411017.1	Bacillus phage Palmer, complete genome. [25-AUG-2017]
KM236247.1	Bacillus phage Pascal, complete genome. [25-AUG-2017]
KT001911.1	Bacillus phage Pavlov, complete genome
JQ619704.1	Bacillus phage PBC1, complete genome. [26-MAY-2017]
KX227757.1	Bacillus phage PfEFR-4, complete genome
KX227760.1	Bacillus phage PfEFR-5, complete genome
KX227759.1	Bacillus phage PfIS075, complete genome
KX227758.1	Bacillus phage PfNC7401, complete genome
HM072038.1	Bacillus phage phi105, complete genome. [25-AUG-2017]
EU771092.1	Bacillus phage phi29, complete genome. [25-AUG-2017]
KT626446.1	Bacillus phage phi4B1, complete genome
KT967075.1	Bacillus phage phi4I1, complete genome
KT970645.1	Bacillus phage phi4J1, complete genome
JX238501.3	Bacillus phage phiAGATE, complete genome. [25-AUG-2017]
KF296718.1	Bacillus phage phiCM3, complete genome
AP013029.1	Bacillus phage phiNIT1 DNA, complete genome. [25-AUG-2017]
JQ062992.1	Bacillus phage phIS3501, complete genome. [25-AUG-2017]
KT970646.1	Bacillus phage phiS58, complete genome
KU737347.1	Bacillus phage Phrodo, complete genome
AB711120.1	Bacillus phage PM1 DNA, complete genome. [25-AUG-2017]
KF669660.1	Bacillus phage Pony, complete genome. [25-AUG-2017]
KM236248.1	Bacillus phage Pookie, complete genome. [25-AUG-2017]
MF288917.1	Bacillus phage PPIsBest, complete genome
KF296717.1	Bacillus phage proCM3, complete genome
KF669659.1	Bacillus phage Riggi, complete genome. [25-AUG-2017]
KJ489402.1	Bacillus phage Riley, complete genome. [25-AUG-2017]
KU737350.1	Bacillus phage SageFayge, complete genome
KX011169.1	Bacillus phage SalinJah, complete genome
KC595513.2	Bacillus phage Shanette, complete genome. [25-AUG-2017]
KU640380.1	Bacillus phage Shbh1, complete genome
KF669661.1	Bacillus phage Slash, complete genome. [26-MAY-2017]
AB605730.1	Bacillus phage SP10 DNA, complete sequence
KT624200.1	Bacillus phage SP-15, complete genome
AB930182.1	Bacillus phage SPG24 DNA, contig00001 sequence
FJ230960.1	Bacillus phage SPO1, complete genome. [25-AUG-2017]
KF669662.1	Bacillus phage Spock, complete genome. [25-AUG-2017]
KP696447.1	Bacillus phage Stahl, complete genome. [26-MAY-2017]
KF669663.1	Bacillus phage Staley, complete genome. [26-MAY-2017]
KP696448.1	Bacillus phage Stills, complete genome. [26-MAY-2017]
KX349901.1	Bacillus phage Stitch, complete genome
MF765814.1	Bacillus phage Taffo16, complete genome
KC330682.1	Bacillus phage Taylor, complete genome. [25-AUG-2017]
EU887664.1	Bacillus phage TP21-L, complete genome
KF208639.2	Bacillus phage Troll, complete genome. [25-AUG-2017]
KT224359.1	Bacillus phage TsarBomba, complete genome
KC481682.1	Bacillus phage vB_BanS-Tsamsa, complete genome. [25-AUG-2017]
KT725776.1	Bacillus phage vB_BceS-MY192, partial genome
KU160496.1	Bacillus phage vB_BhaS-171, complete genome
JX887877.1	Bacillus phage vB_BtS_BMBtp2, complete genome. [25-AUG-2017]
KJ024807.2	Bacillus phage vB_BtS_BMBtp3, complete genome. [25-AUG-2017]
KT780304.1	Bacillus phage VMY22, complete genome
HM144387.1	Bacillus phage W.Ph., complete genome. [25-AUG-2017]
KJ920400.1	Bacillus phage Waukesha92, complete genome. [25-AUG-2017]
KF188458.1	Bacillus phage Wip1, complete genome. [26-MAY-2017]
KU737348.1	Bacillus phage Zuko, complete genome
AY257527.1	Bacillus thuringiensis bacteriophage Bam35c, complete genome
DQ840344.2	Bacillus virus 1, complete genome
DQ163914.1	Bacteriophage 119X, complete genome. [29-AUG-2014]
AJ842011.2	Bacteriophage 11b complete genome [25-AUG-2017]
LN889991.1	Bacteriophage 15G genome assembly, chromosome: 1
NC_001317.1	Bacteriophage 186, complete sequence
AY954950.1	Bacteriophage 187, complete genome. [25-AUG-2017]
AY954954.1	Bacteriophage 2638A, complete genome. [26-MAY-2017]
AY954964.1	Bacteriophage 29, complete genome. [25-AUG-2017]
AY954958.1	Bacteriophage 37, complete genome. [25-AUG-2017]
AY954956.1	Bacteriophage 3A, complete genome. [25-AUG-2017]
AY954955.1	Bacteriophage 42e, complete genome. [25-AUG-2017]
AY375531.1	Bacteriophage 44RR2.8t, complete genome
AY954957.1	Bacteriophage 47, complete genome. [25-AUG-2017]
AY954965.1	Bacteriophage 52A, complete genome. [26-MAY-2017]
AY954952.1	Bacteriophage 53, complete genome. [25-AUG-2017]
AY954963.1	Bacteriophage 55, complete genome. [26-MAY-2017]
AY954949.1	Bacteriophage 66, complete genome. [11-NOV-2016]
AY954951.1	Bacteriophage 69, complete genome. [25-AUG-2017]
AY954962.1	Bacteriophage 71, complete genome. [25-AUG-2017]
AY508486.1	Bacteriophage 77, complete genome. [26-MAY-2017]
AY954953.1	Bacteriophage 85, complete genome. [25-AUG-2017]
AY954966.1	Bacteriophage 88, complete genome. [25-AUG-2017]
AY954967.1	Bacteriophage 92, complete genome. [25-AUG-2017]
AF125520.1	Bacteriophage 933W, complete genome. [26-MAY-2017]
AY954960.1	Bacteriophage 96, complete genome. [25-AUG-2017]
AJ242593.1	Bacteriophage A118 complete genome [25-AUG-2017]
X91069.1	Bacteriophage A511 orf1, orf2, cps, orf3, orf4, orf5, orf6, orf7, tsh, orf8, and orf9 genes
AJ560763.1	Bacteriophage Aaphi23 complete genome
AY266303.2	Bacteriophage Aeh1, complete genome
AF334111.2	Bacteriophage AP205, complete genome
EU794049.1	Bacteriophage APSE-2, complete genome. [25-AUG-2017]
AF232233.1	Bacteriophage B3, complete genome. [25-AUG-2017]
AM183667.1	Bacteriophage Berlin complete genome [25-AUG-2017]
AF009630.1	Bacteriophage bIL170, complete genome. [25-AUG-2017]
AF323668.1	Bacteriophage bIL285, complete genome. [25-AUG-2017]
AF323669.1	Bacteriophage bIL286, complete genome. [26-MAY-2017]
AF323670.1	Bacteriophage bIL309, complete genome. [25-AUG-2017]
AF323671.1	Bacteriophage bIL310, complete genome. [26-MAY-2017]
AF323672.1	Bacteriophage bIL311, complete genome. [26-MAY-2017]
AF323673.1	Bacteriophage bIL312, complete genome. [25-AUG-2017]
AJ304858.2	Bacteriophage CP-1639 and chromosomal integration site
AF165214.2	Bacteriophage D3, complete genome. [26-MAY-2017]
AY394005.1	Bacteriophage D3112, complete genome
KP296791.1	Bacteriophage Diva, complete genome. [26-MAY-2017]
AJ609634.1	Bacteriophage EJ-1 proviral DNA, complete genome
AY954959.1	Bacteriophage EW, complete genome. [25-AUG-2017]
DQ163912.1	Bacteriophage F10, complete genome. [29-AUG-2014]
DQ163917.1	Bacteriophage F8, complete genome. [24-FEB-2017]
AF320576.1	Bacteriophage Felix 01, complete genome
AF071201.1	Bacteriophage Felix 1 red gene, complete cds; and unknown genes
AY954969.1	Bacteriophage G1, complete genome. [25-AUG-2017]
AF069308.1	Bacteriophage HK022, complete genome. [25-AUG-2017]
AF335538.1	Bacteriophage HK620, complete genome. [25-AUG-2017]
AF069529.1	Bacteriophage HK97, complete genome. [25-AUG-2017]
DQ121662.1	Bacteriophage JK06, complete genome. [25-AUG-2017]
AF125163.2	Bacteriophage K139, complete genome
AY283928.2	Bacteriophage KVP40, complete genome
AY251033.1	Bacteriophage L-413C, complete genome
AY131267.2	Bacteriophage Lc-Nu, complete genome. [26-MAY-2017]
KP296792.1	Bacteriophage Lily, complete genome. [26-MAY-2017]
AM265638.1	Bacteriophage LKD16 complete genome, specific host Pseudomonas aeruginosa [26-MAY-2017]
DQ163916.1	Bacteriophage M6, complete genome. [11-NOV-2016]
AF083977.1	Bacteriophage Mu, complete genome. [25-AUG-2017]
DQ372923.1	Bacteriophage mu1/6, complete genome
AF059242.1	Bacteriophage MX1, complete genome. [13-NOV-2015]
AF396866.1	Bacteriophage Mx8, complete genome. [25-AUG-2017]
AF064539.1	Bacteriophage N15, complete genome. [26-MAY-2017]
AF063097.1	Bacteriophage P2, complete genome. [25-AUG-2017]
AF217253.1	Bacteriophage P22 complete genome
AF527608.1	Bacteriophage P22-pbi, complete sequence. [25-AUG-2017]
AJ298298.1	Bacteriophage P27 complete genome [25-AUG-2017]
DQ163915.1	Bacteriophage PA11, complete genome. [29-AUG-2014]
DQ163913.1	Bacteriophage PA73, complete genome. [24-FEB-2017]
AY605066.1	Bacteriophage phi AT3, complete sequence. [26-MAY-2017]
AF242738.3	Bacteriophage phi LC3, complete genome. [25-AUG-2017]
AY453853.1	Bacteriophage phi1026b, complete genome
AB016282.1	Bacteriophage phi-105 DNA, complete sequence. [25-AUG-2017]
AY039807.1	Bacteriophage phi-12 membrane protein P10 (10), membrane protein P6 (6), host attachment protein P3a (3a), host attachment protein P3b (3b), and P3c (3c) genes, complete cds. [13-NOV-2015]
AY034425.1	Bacteriophage phi-12 nucleocapsid protein P8, morphogenetic protein P12, membrane protein P9, and muramidase genes, complete cds. [26-MAY-2017]
AF408636.1	Bacteriophage phi-12 P14 (14), P15 (15), core protein P7 (7), RNA-dependent RNA polymerase P2 (2), NTPase P4 (4), and major core structural protein P1 -1 genes, complete cds. [28-AUG-2015]
AY082070.1	Bacteriophage phi3626, complete genome. [25-AUG-2017]
M17461.1	Bacteriophage phi-6 complete L segment, containing P1, P2, P4, and P7 proteins, complete cds. [26-MAY-2017]
M17462.1	Bacteriophage phi-6 complete M segment, containing P3, P6, P10, and P13 proteins, complete cds. [28-AUG-2015]
M12921.1	Bacteriophage phi-6 segment-S, containing P8 (major nucleocapsid protein), P12 (morphogenetic protein), P9 (major membrane protein) and P5 (phage lysosome) coding regions. [26-MAY-2017]
AJ550940.2	Bacteriophage phi-BT1 complete genome [25-AUG-2017]
X76288.1	Bacteriophage phi-C31 early region, virus genome
AF447491.1	Bacteriophage phiE125, complete genome. [25-AUG-2017]
NC_001730.1	Bacteriophage phiK complete genome
AJ505558.1	Bacteriophage phiKMV complete genome [26-MAY-2017]
AY374448.1	Bacteriophage phiKO2, complete genome. [26-MAY-2017]
DQ426905.1	Bacteriophage phi-MhaA1-BAA410, complete genome. [25-AUG-2017]
DQ426904.1	Bacteriophage phi-MhaA1-PHL101, complete genome. [25-AUG-2017]
AJ251805.1	Bacteriophage phiYeO3-12 complete genome [25-AUG-2017]
AJ312240.2	Bacteriophage PSA complete genome [26-MAY-2017]
AY954948.1	Bacteriophage PT1028, complete genome. [26-MAY-2017]
AJ564013.1	Bacteriophage PY54 complete genome
NC_004302.1	Bacteriophage r1t integrase, repressor protein (rro), dUTPase, holin and lysin genes, complete cds
KP296793.1	Bacteriophage Rani, complete genome. [26-MAY-2017]
DQ904452.1	Bacteriophage RB32, complete genome. [25-AUG-2017]
KP296794.1	Bacteriophage Redbud, complete genome. [26-MAY-2017]
AY954961.1	Bacteriophage ROSA, complete genome. [25-AUG-2017]
AM156909.1	Bacteriophage RTP, complete genome [25-AUG-2017]
KP296795.1	Bacteriophage Shelly, complete genome. [26-MAY-2017]
KP296796.1	Bacteriophage Sitara, complete genome. [26-MAY-2017]
AF011378.1	Bacteriophage sk1 complete genome. [25-AUG-2017]
AF020713.1	Bacteriophage SPBc2 complete genome. [25-AUG-2017]
AJ630128.1	Bacteriophage S-PM2 complete genome [25-AUG-2017]
AF031901.1	Bacteriophage SPO1 early gene region of the terminal redundancy, right-most sequence
NC_004166.2	Bacteriophage SPP1 complete nucleotide sequence
AJ318471.1	Bacteriophage T3 complete genome, strain Luria [25-AUG-2017]
X17255.1	Bacteriophage T3 gene 1 to gene 11
AY587007.1	Bacteriophage T5 strain ATCC 11303-B5, complete genome. [25-AUG-2017]
AY692264.1	Bacteriophage T5 strain st0 deletion mutant, complete genome
AY543070.1	Bacteriophage T5, complete genome. [25-AUG-2017]
MF431730.1	Bacteriophage T5-like chee24, complete genome
MF431731.1	Bacteriophage T5-like pork27, complete genome
MF431735.1	Bacteriophage T5-like poul124, complete genome
MF431734.1	Bacteriophage T5-like saus111K, complete genome
AY308796.1	Bacteriophage TLS, complete genome. [25-AUG-2017]
AF304433.1	Bacteriophage TP901-1, complete sequence
AF109874.2	Bacteriophage Tuc2009, complete genome. [25-AUG-2017]
AF452449.2	Bacteriophage VSKK, complete genome. [13-NOV-2015]
AY320035.2	Bacteriophage VWB, complete genome. [26-MAY-2017]
AY135739.1	Bacteriophage WPhi, complete genome
AY954968.1	Bacteriophage X2, complete genome. [25-AUG-2017]
HE608841.1	Bacteroides phage B124-14 complete genome [26-MAY-2017]
FJ008913.1	Bacteroides phage B40-8 culture-collection ATCC:51477-B1, complete genome. [26-MAY-2017]
JF344709.1	Bdellovibrio phage phi1402, complete sequence
JQ177062.1	Bdellovibrio phage phi1422, complete genome. [25-AUG-2017]
AY029185.2	Bordetella phage BPP-1, complete genome
KT151955.1	Brevibacillus phage Jenst, complete genome
KC595515.1	Brevibacillus phage Jimmer1, complete genome. [25-AUG-2017]
KT151956.1	Brevibacillus phage Osiris, complete genome
KT151957.1	Brevibacillus phage SecTim467, complete genome
KT151959.1	Brevibacillus phage Sundance, complete genome
HM144386.1	Brochothrix phage BL3, complete genome. [25-AUG-2017]
HM144385.1	Brochothrix phage NF5, complete genome. [25-AUG-2017]
KJ133688.1	Brucella phage 02_19, complete genome
KJ133703.1	Brucella phage 1066_141, complete genome
KJ133702.1	Brucella phage 1066_19, complete genome
KJ133693.1	Brucella phage 110_141, complete genome
KJ133692.1	Brucella phage 110_19, complete genome
KJ133691.1	Brucella phage 11sa_141, complete genome
KJ133695.1	Brucella phage 141_141, complete genome
KJ133694.1	Brucella phage 141_19, complete genome
KJ133696.1	Brucella phage 177_19, complete genome
KJ133699.1	Brucella phage 281_141, complete genome
KJ133698.1	Brucella phage 281_19, complete genome
KJ133701.1	Brucella phage 544_141, complete genome
KJ133700.1	Brucella phage 544_19, complete genome
KT724718.1	Brucella phage BiPBO1, complete genome
KC556893.1	Brucella phage Bk, complete genome. [26-MAY-2017]
HF569088.1	Brucella phage Bk2 complete sequence
HG428758.1	Brucella phage F1 complete genome [26-MAY-2017]
HF569089.1	Brucella phage Fi complete sequence
KC556894.1	Brucella phage Fz, complete genome. [26-MAY-2017]
KY056619.1	Brucella phage Iz, complete genome
JN939332.1	Brucella phage Pr, complete genome. [26-MAY-2017]
HF569090.1	Brucella phage R/C complete sequence
KC556895.1	Brucella phage R/C, complete genome. [26-MAY-2017]
HF569091.1	Brucella phage Tb complete sequence, isolate BfR
JN939331.1	Brucella phage Tb, complete genome. [26-MAY-2017]
KC556897.1	Brucella phage Tb, complete genome. [26-MAY-2017]
KJ133704.1	Brucella phage Tbilisi, complete genome
KJ133707.1	Brucella phage V_141, complete genome
HF569092.1	Brucella phage Wb complete sequence
EF153632.1	Burkholderia ambifaria phage BcepF1, complete genome. [25-AUG-2017]
AY369265.2	Burkholderia cenocepacia phage Bcep1, complete genome
AY616033.2	Burkholderia cenocepacia phage BcepB1A, complete genome. [26-MAY-2017]
FJ937737.2	Burkholderia cenocepacia phage BcepIL02, complete genome. [26-MAY-2017]
AY539836.1	Burkholderia cenocepacia phage BcepMu, complete genome. [25-AUG-2017]
AY605181.1	Burkholderia cepacia complex phage BcepC6B, complete genome. [26-MAY-2017]
DQ203855.1	Burkholderia cepacia phage Bcep176, complete genome. [26-MAY-2017]
AY349011.3	Burkholderia cepacia phage Bcep22, complete genome
AY368235.2	Burkholderia cepacia phage Bcep43, complete genome. [25-AUG-2017]
AF543311.2	Burkholderia cepacia phage Bcep781, complete genome
AY357582.2	Burkholderia cepacia phage BcepNazgul, complete genome
JN564907.1	Burkholderia phage AH2, complete genome. [26-MAY-2017]
EF523948.1	Burkholderia phage BcepGomr, complete genome. [26-MAY-2017]
JX104231.1	Burkholderia phage BcepMigl, complete genome. [26-MAY-2017]
EF602154.1	Burkholderia phage BcepNY3, complete genome. [25-AUG-2017]
CP008753.1	Burkholderia phage BEK, complete genome. [25-AUG-2017]
HG793132.1	Burkholderia phage Bp-AMP1 complete genome [26-MAY-2017]
HG796219.1	Burkholderia phage Bp-AMP2 complete genome [26-MAY-2017]
HG796220.1	Burkholderia phage Bp-AMP3 complete genome [26-MAY-2017]
HG796221.1	Burkholderia phage Bp-AMP4 complete genome [26-MAY-2017]
JN662425.1	Burkholderia phage DC1, complete genome. [26-MAY-2017]
KC853746.1	Burkholderia phage JG068, complete genome. [26-MAY-2017]
JF939047.1	Burkholderia phage KL1, complete genome. [26-MAY-2017]
GU911304.1	Burkholderia phage KL3, complete genome. [25-AUG-2017]
EU822883.1	Burkholderia phage KS10, complete genome. [26-MAY-2017]
HM461982.1	Burkholderia phage KS14, complete genome. [25-AUG-2017]
GU911303.1	Burkholderia phage KS5, complete genome. [25-AUG-2017]
FJ982340.1	Burkholderia phage KS9, complete genome. [26-MAY-2017]
CP000625.2	Burkholderia phage phi644-2, complete genome. [25-AUG-2017]
CP000624.1	Burkholderia phage phiE12-2, complete genome. [25-AUG-2017]
CP000623.1	Burkholderia phage phiE202, complete genome. [25-AUG-2017]
CP000622.1	Burkholderia phage phiE255, complete genome. [25-AUG-2017]
JX681814.1	Burkholderia phage phiX216, complete genome. [25-AUG-2017]
KC462197.1	Burkholderia phage ST79, complete genome. [25-AUG-2017]
DQ087285.2	Burkholderia pseudomallei phage phi52237, complete genome
EF694685.1	Campylobacter phage CGC-2007 isolate Cj00-2425 cje0217 gene, partial cds; cje0218, cje0219, cje0220, cje0221, cje0222, cje0223, cje0224, cje0225, cje0226, cje0227, cje0228, cje0229, cje0230, and cje0231 genes, complete cds; and cje0232 gene, partial cds
EF694686.1	Campylobacter phage CGC-2007 isolate Cj00-2538 cje0217 gene, partial cds; cje0218, cje0219, cje0220, cje0221, cje0222, cje0223, cje0224, cje0225, cje0226, cje0227, cje0228, cje0229, cje0230, and cje0231 genes, complete cds; and cje0232 gene, partial cds
HE815464.1	Campylobacter phage CP21 complete sequence
FN667788.1	Campylobacter phage CP220, complete genome [25-AUG-2017]
JX569801.1	Campylobacter phage CP30A, complete genome. [25-AUG-2017]
KF148616.1	Campylobacter phage CP8, complete genome. [25-AUG-2017]
FR823450.1	Campylobacter phage CP81, complete genome [25-AUG-2017]
FN667789.1	Campylobacter phage CPt10, complete genome [25-AUG-2017]
JN132397.1	Campylobacter phage CPX, complete genome. [25-AUG-2017]
GU296433.1	Campylobacter phage NCTC12673, complete genome. [25-AUG-2017]
KX236333.1	Campylobacter phage PC14, complete genome
KY555142.1	Caulobacter phage Ccr10, complete genome
KY555143.1	Caulobacter phage Ccr2, complete genome
KY555145.1	Caulobacter phage Ccr29, complete genome
KY555146.1	Caulobacter phage Ccr32, complete genome
KY555147.1	Caulobacter phage Ccr34, complete genome
JX100810.1	Caulobacter phage CcrColossus, complete genome. [25-AUG-2017]
JX100811.1	Caulobacter phage CcrKarma, complete genome. [25-AUG-2017]
JX100812.1	Caulobacter phage CcrMagneto, complete genome. [25-AUG-2017]
JX100814.1	Caulobacter phage CcrRogue, complete genome. [25-AUG-2017]
JX100809.1	Caulobacter phage CcrSwift, complete genome. [25-AUG-2017]
KF301602.1	Caulobacter phage Cr30, complete genome. [25-AUG-2017]
KT381879.1	Caulobacter phage Percy, complete genome
HM066936.1	Caulobacter phage phiCb5, complete genome. [13-NOV-2015]
JX100813.1	Caulobacter phage phiCbK, complete genome. [25-AUG-2017]
JX163858.1	Caulobacter phage phiCbK, complete genome. [25-AUG-2017]
JQ809650.1	Celeribacter phage P12053L, complete genome. [26-MAY-2017]
KC821618.1	Cellulophaga phage phi10:1, complete genome. [25-AUG-2017]
KC821613.1	Cellulophaga phage phi12:1, complete genome. [25-AUG-2017]
KC821606.1	Cellulophaga phage phi12:2, complete genome. [03-JAN-2016]
KC821615.1	Cellulophaga phage phi12:3, complete genome. [25-AUG-2017]
KC821623.1	Cellulophaga phage phi12a:1, complete genome. [03-JAN-2016]
KC821633.1	Cellulophaga phage phi13:2, complete genome. [26-MAY-2017]
KC821624.1	Cellulophaga phage phi14:2, complete genome. [26-MAY-2017]
KC821617.1	Cellulophaga phage phi17:1, complete genome. [25-AUG-2017]
KC821609.1	Cellulophaga phage phi17:2, complete genome. [26-MAY-2017]
KC821619.1	Cellulophaga phage phi18:1, complete genome. [25-AUG-2017]
KC821620.1	Cellulophaga phage phi18:3, complete genome. [26-MAY-2017]
KC821607.1	Cellulophaga phage phi19:1, complete genome. [25-AUG-2017]
KC821621.1	Cellulophaga phage phi19:2, complete genome. [25-AUG-2017]
KC821608.1	Cellulophaga phage phi19:3, complete genome. [26-MAY-2017]
KC821630.1	Cellulophaga phage phi3:1, complete genome. [26-MAY-2017]
KC821614.1	Cellulophaga phage phi38:1, complete genome. [26-MAY-2017]
KC821629.1	Cellulophaga phage phi38:2, complete genome. [25-AUG-2017]
KC821626.1	Cellulophaga phage phi39:1, complete genome. [25-AUG-2017]
KC821610.1	Cellulophaga phage phi3ST:2, complete genome. [25-AUG-2017]
KC821632.1	Cellulophaga phage phi4:1, complete genome. [26-MAY-2017]
KC821612.1	Cellulophaga phage phi40:1, complete genome. [26-MAY-2017]
KC821611.1	Cellulophaga phage phi46:1, complete genome. [25-AUG-2017]
KC821622.1	Cellulophaga phage phi46:3, complete genome. [26-MAY-2017]
KC821634.1	Cellulophaga phage phi47:1, complete genome. [25-AUG-2017]
HQ317392.1	Cellulophaga phage phiSM genomic sequence
KC821616.1	Cellulophaga phage phiSM, complete genome. [26-MAY-2017]
HQ634192.1	Cellulophaga phage phiST genomic sequence
KC821604.1	Cellulophaga phage phiST, complete genome. [25-AUG-2017]
KR704913.1	Chimpanzee faeces associated microphage 1 isolate CPNG_29298, complete genome
KR704914.1	Chimpanzee faeces associated microphage 2 isolate CPNG_29299, complete genome
KR704915.1	Chimpanzee faeces associated microphage 3 isolate CPNG_29300, complete genome
AJ270057.1	Chlamydia phage 2 DNA, complete genome [29-AUG-2014]
AY769964.1	Chlamydia phage 4, complete genome. [29-AUG-2014]
D00624.1	Chlamydia phage Chp1 DNA, complete genome. [26-MAY-2017]
HG818823.1	Citrobacter phage CR44b complete genome [25-AUG-2017]
HG818824.1	Citrobacter phage CR8 complete genome [25-AUG-2017]
KP774835.2	Citrobacter phage CVT22, complete genome
KR869820.1	Citrobacter phage IME-CF2, complete genome
KT381880.1	Citrobacter phage Margaery, complete genome
KT001915.1	Citrobacter phage Merlin, complete genome
KT001916.1	Citrobacter phage Michonne, complete genome
KY654690.2	Citrobacter phage Mijalis, complete genome
KM236237.1	Citrobacter phage Miller, complete genome
KM236239.1	Citrobacter phage Moogle, complete genome. [25-AUG-2017]
KM236240.1	Citrobacter phage Moon, complete genome. [25-AUG-2017]
KT363872.2	Citrobacter phage Mordin, complete genome
KP313531.1	Citrobacter phage phiCFP-1, complete genome. [25-AUG-2017]
KU687347.1	Citrobacter phage SH1, complete genome
KU687348.1	Citrobacter phage SH2, complete genome
KU687349.1	Citrobacter phage SH3, complete genome
KU687350.1	Citrobacter phage SH4, complete genome
KM236241.1	Citrobacter phage Stevie, complete genome. [25-AUG-2017]
KX245890.1	Citrobacter phage vB_CfrM_CfP1, complete genome
GQ241246.1	Clavibacter phage CMP1, complete genome. [26-MAY-2017]
KF669650.1	Clavibacter phage CN1A, complete genome. [26-MAY-2017]
AY855346.1	Clostridium difficile bacteriophage phi CD119, complete genome. [25-AUG-2017]
EU588980.1	Clostridium phage 39-O, complete genome. [25-AUG-2017]
KX228400.1	Clostridium phage CDKM15, complete genome
HG531805.1	Clostridium phage CDMH1 complete genome [25-AUG-2017]
KU057941.1	Clostridium phage CDSH1, complete genome
GQ443085.1	Clostridium phage CP26F, complete genome. [26-MAY-2017]
AP008983.1	Clostridium phage c-st genomic DNA, complete genome. [25-AUG-2017]
JF767208.1	Clostridium phage phi13O, complete genome. [26-MAY-2017]
JN800508.1	Clostridium phage phi24R, complete genome. [26-MAY-2017]
JF767209.1	Clostridium phage phi34O, complete genome. [26-MAY-2017]
JQ246028.1	Clostridium phage phi8074-B1, complete genome. [25-AUG-2017]
JF767210.1	Clostridium phage phi9O, complete genome. [26-MAY-2017]
DQ466086.1	Clostridium phage phiC2, complete genome. [25-AUG-2017]
LN681535.1	Clostridium phage phiCD111, complete genome [25-AUG-2017]
LN681536.1	Clostridium phage phiCD146, complete genome [25-AUG-2017]
LN681537.2	Clostridium phage phiCD211, complete genome [19-JUL-2017]
EU719189.1	Clostridium phage phiCD27, complete genome. [25-AUG-2017]
HM568888.1	Clostridium phage phiCD38-2, complete genome. [26-MAY-2017]
LN681538.1	Clostridium phage phiCD481-1, complete genome [25-AUG-2017]
LN681539.1	Clostridium phage phiCD505, complete genome [25-AUG-2017]
LN681540.1	Clostridium phage phiCD506, complete genome [25-AUG-2017]
GU949551.1	Clostridium phage phiCD6356, complete genome. [25-AUG-2017]
HG796225.1	Clostridium phage phiCDHM13 complete genome [25-AUG-2017]
JQ729990.1	Clostridium phage phiCP7R, complete genome. [27-MAY-2016]
KM983330.1	Clostridium phage phiCT19406A, complete genome. [25-AUG-2017]
KM983331.1	Clostridium phage phiCT19406B, complete genome. [25-AUG-2017]
KM983332.1	Clostridium phage phiCT19406C, complete genome. [25-AUG-2017]
KM983327.1	Clostridium phage phiCT453A, complete genome. [25-AUG-2017]
KM983328.1	Clostridium phage phiCT453B, complete genome. [25-AUG-2017]
KM983329.1	Clostridium phage phiCT9441A, complete genome. [25-AUG-2017]
HM159959.1	Clostridium phage phiCTP1, complete genome
LN681541.1	Clostridium phage phiMMP01, complete genome [25-AUG-2017]
JX145341.1	Clostridium phage phiMMP02, complete genome. [25-AUG-2017]
LN681542.1	Clostridium phage phiMMP03, complete genome [25-AUG-2017]
JX145342.1	Clostridium phage phiMMP04, complete genome. [25-AUG-2017]
JQ660954.1	Clostridium phage PhiS63, complete genome. [25-AUG-2017]
CP000315.1	Clostridium phage phiSM101, complete genome. [26-MAY-2017]
JQ729992.1	Clostridium phage phiZP2, complete genome. [27-MAY-2016]
KC237729.1	Clostridium phage vB_CpeS-CP51, complete genome. [25-AUG-2017]
DQ111067.1	Coliphage K1F, complete genome. [26-MAY-2017]
AF299302.1	Coliphage phiX174 isolate C, complete genome
AF299301.1	Coliphage phiX174 isolate CM, complete genome
AF176027.1	Coliphage phiX174 isolate S1, complete genome
AF176029.1	Coliphage phiX174 isolate SC2, complete genome
AF176031.1	Coliphage phiX174 isolate SCS2, complete genome
AF176033.1	Coliphage phiX174 isolate SCSC2, complete genome
DQ079873.1	Coliphage WA13, complete genome. [26-MAY-2017]
HQ317390.1	Colwellia phage 9A, complete genome. [25-AUG-2017]
AJ278322.4	Corynebacterium phage BFK20 [25-AUG-2017]
KY624611.1	Corynebacterium phage LGCM-V4, complete genome
KY566218.1	Corynebacterium phage LGCM-VI, complete genome
DQ499600.1	Corynebacterium phage P1201, complete genome. [26-MAY-2017]
MG198778.1	Corynebacterium phage PotatoChip, complete genome
MG198780.1	Corynebacterium phage Zion, complete genome
JQ867099.1	Croceibacter phage P2559S, complete genome. [26-MAY-2017]
KC688701.1	Croceibacter phage P2559Y, complete genome
JQ691612.1	Cronobacter phage CR3, complete genome. [25-AUG-2017]
JX094500.1	Cronobacter phage CR5, complete genome
KC954774.1	Cronobacter phage CR8, complete genome. [25-AUG-2017]
JQ691611.1	Cronobacter phage CR9, complete genome. [25-AUG-2017]
HG813241.1	Cronobacter phage Dev2 complete genome [26-MAY-2017]
LN878149.1	Cronobacter phage Dev-CD-23823 complete sequence
HQ201307.1	Cronobacter phage ENT39118, complete genome
HQ201308.1	Cronobacter phage ENT47670, complete genome
JF912400.1	Cronobacter phage ESP2949-1, complete genome. [25-AUG-2017]
KT353109.1	Cronobacter phage PBES 02, complete genome
JQ780327.1	Cronobacter phage phiES15, complete sequence
JN882287.1	Cronobacter phage vB_CsaM_GAP161, complete genome. [25-AUG-2017]
JN882284.1	Cronobacter phage vB_CsaM_GAP31, complete genome. [25-AUG-2017]
JN882285.1	Cronobacter phage vB_CsaM_GAP32, complete genome. [25-AUG-2017]
JN882286.1	Cronobacter phage vB_CsaP_GAP52, complete genome. [25-AUG-2017]
KC107834.1	Cronobacter sakazakii phage vB_CskP_GAP227, complete genome. [26-MAY-2017]
CU468217.1	CU468217 Azospirillum brasilense bacteriophage Cd, complete genome. [25-AUG-2017]
GU071100.1	Cyanophage 9515-10a, complete genome. [26-MAY-2017]
JF974293.1	Cyanophage KBS-M-1A genomic sequence
HQ634188.1	Cyanophage KBS-P-1A genomic sequence
HQ634187.1	Cyanophage KBS-S-2A genomic sequence
JF974321.1	Cyanophage MED4-117 genomic sequence
JF974286.1	Cyanophage MED4-184 genomic sequence
HQ634174.1	Cyanophage MED4-213, complete genome. [25-AUG-2017]
GU071102.1	Cyanophage NATL1A-7, complete genome. [26-MAY-2017]
DQ875742.1	Cyanophage Pf-WMP4, complete genome. [26-MAY-2017]
KF598865.1	Cyanophage PP, complete genome. [26-MAY-2017]
HQ634175.1	Cyanophage P-RSM1 genomic sequence
HQ634176.1	Cyanophage P-RSM3 genomic sequence
HQ634193.1	Cyanophage P-RSM6 genomic sequence
GQ334450.1	Cyanophage PSS2, complete genome. [25-AUG-2017]
GU071090.1	Cyanophage PSS2, partial genome
GU071107.1	Cyanophage P-SSP2, complete genome. [26-MAY-2017]
KP211958.1	Cyanophage P-TIM40, complete genome. [25-AUG-2017]
KX349309.1	Cyanophage S-RIM12 isolate Np_22_1112, complete genome
KX349316.1	Cyanophage S-RIM12 isolate RW_22_0110, complete genome
KX349304.1	Cyanophage S-RIM14 isolate Sn_18_0910, complete genome
KX349305.1	Cyanophage S-RIM14 isolate Sn_23_0910, complete genome
KU594606.1	Cyanophage S-RIM32 isolate RW_108_0702, complete genome
KX349292.1	Cyanophage S-RIM44 isolate Np_05_0604, complete genome
KX349295.1	Cyanophage S-RIM44 isolate Sn_08_0709, complete genome
KU594605.1	Cyanophage S-RIM50 isolate RW_29_0704, complete genome
HQ316584.1	Cyanophage SS120-1 genomic sequence
HQ316583.1	Cyanophage S-SSM4 genomic sequence
HQ316603.1	Cyanophage S-SSM6b genomic sequence
JQ245707.1	Cyanophage S-TIM5, complete genome. [25-AUG-2017]
HQ634189.1	Cyanophage Syn30 genomic sequence
EF372997.1	Cyanophage Syn5, complete genome. [26-MAY-2017]
GQ357915.1	Deftia phage phiW-14, complete genome. [25-AUG-2017]
KR153873.1	Delftia phage IME-DE1, complete genome
KM879221.2	Delftia phage RG-2014, complete genome. [25-AUG-2017]
KY942056.1	Dickeya phage JA15, complete genome
KM209228.1	Dickeya phage phiD3, complete genome
MG266157.1	Dickeya phage PP35, complete genome
KJ716335.1	Dickeya phage RC-2014, complete genome. [25-AUG-2017]
HE600015.1	Dickeya phage vB_DsoM_LIMEstone1 complete genome [25-AUG-2017]
KY942057.1	Dickeya phage XF4, complete genome
KJ621082.2	Dinoroseobacter phage DFL12phi1, complete genome. [25-AUG-2017]
AF261668.1	DsRNA bacteriophage phi-13 segment L P7 (7), P2 (2), P4 (4), and P1 -1 genes, complete cds. [26-MAY-2017]
AF261667.1	DsRNA bacteriophage phi-13 segment M P10 (10), P6 (6), P3a (3a), P3b (3b), and P3c (3c) genes, complete cds. [29-AUG-2014]
AF261666.1	DsRNA bacteriophage phi-13 segment S P8 (8), P12 (12), P9 (9), and P5 -5 genes, complete cds. [29-AUG-2014]
KF772233.1	Edwardsiella phage eiAU, complete genome. [25-AUG-2017]
KF772234.1	Edwardsiella phage eiAU-183, complete genome. [25-AUG-2017]
AP014629.1	Edwardsiella phage GF-2 DNA, complete sequence
AB757800.1	Edwardsiella phage KF-1 DNA, complete genome. [26-MAY-2017]
AB767244.1	Edwardsiella phage MSW-3 DNA, complete genome. [25-AUG-2017]
AP014714.1	Edwardsiella phage PEi20 DNA, complete sequence
AP013057.1	Edwardsiella phage PEi21 DNA, complete genome. [25-AUG-2017]
KP087957.1	Eel River basin pequenovirus isolate c22476, complete genome
KX231828.1	Enterobacter phage Arya, complete genome
KP791805.1	Enterobacter phage E-2, complete genome. [25-AUG-2017]
KP791806.1	Enterobacter phage E-3, complete genome. [25-AUG-2017]
KP791807.1	Enterobacter phage E-4, complete genome. [25-AUG-2017]
HQ641380.1	Enterobacter phage EcP1, complete genome. [26-MAY-2017]
JQ340774.1	Enterobacter phage Enc34, complete genome. [26-MAY-2017]
JX880034.1	Enterobacter phage IME11, complete genome. [25-AUG-2017]
KJ101592.1	Enterobacter phage PG7, complete genome. [25-AUG-2017]
KT321314.1	Enterobacter phage phiEap-1, complete genome
KT287080.2	Enterobacter phage phiEap-2, complete genome
KX231829.1	Enterobacter phage Tyrion, complete genome
EU734174.1	Enterobacteria phage 13a, complete genome. [25-AUG-2017]
FM180578.1	Enterobacteria phage 2851, complete genome [25-AUG-2017]
GQ468526.1	Enterobacteria phage 285P, complete genome. [25-AUG-2017]
KF550303.1	Enterobacteria phage 4MG, complete genome. [25-AUG-2017]
KJ419279.1	Enterobacteria phage 9g, complete genome. [26-MAY-2017]
NC_001330.1	Enterobacteria phage alpha3, complete genome
DQ085810.2	Enterobacteria phage alpha3, complete genome. [26-MAY-2017]
AP011113.1	Enterobacteria phage AR1 DNA, complete genome. [25-AUG-2017]
EU734171.1	Enterobacteria phage BA14, complete genome. [25-AUG-2017]
KJ135004.2	Enterobacteria phage Bp4, complete genome. [25-AUG-2017]
HQ829472.1	Enterobacteria phage Bp7, complete genome. [25-AUG-2017]
KP064094.1	Enterobacteria phage CAjan, complete genome
GU323318.1	Enterobacteria phage CC31, complete genome. [25-AUG-2017]
EU078592.1	Enterobacteria phage DE3, complete genome. [25-AUG-2017]
KM979354.1	Enterobacteria phage DT57C, complete genome. [25-AUG-2017]
EU734172.1	Enterobacteria phage EcoDS1, complete genome. [26-MAY-2017]
KM233151.1	Enterobacteria phage EK99P-1, complete genome
CP000917.1	Enterobacteria phage EPS7, complete genome. [25-AUG-2017]
AY150271.2	Enterobacteria phage epsilon15, complete genome
EF068134.1	Enterobacteria phage FI 4184 b, complete genome. [24-FEB-2017]
NC_004301.1	Enterobacteria phage FI, complete genome
KF322032.1	Enterobacteria phage fiAA91-ss, complete genome. [25-AUG-2017]
NC_001426.1	Enterobacteria phage GA, complete genome
HE978309.1	Enterobacteria phage GEC-3S complete genome
JQ086369.1	Enterobacteria phage HK106, complete genome. [25-AUG-2017]
JQ086370.1	Enterobacteria phage HK140, complete genome. [25-AUG-2017]
JQ086371.1	Enterobacteria phage HK225, complete genome. [26-MAY-2017]
JQ086372.1	Enterobacteria phage HK446, complete genome. [25-AUG-2017]
JQ086373.1	Enterobacteria phage HK542, complete genome. [25-AUG-2017]
JQ086374.1	Enterobacteria phage HK544, complete genome. [25-AUG-2017]
JQ086375.1	Enterobacteria phage HK578, complete genome. [25-AUG-2017]
JQ182735.1	Enterobacteria phage HK629, complete genome
JQ086376.1	Enterobacteria phage HK630, complete genome. [26-MAY-2017]
JQ086377.1	Enterobacteria phage HK633, complete genome. [25-AUG-2017]
JX536493.1	Enterobacteria phage HX01, complete genome. [25-AUG-2017]
NC_001332.1	Enterobacteria phage I2-2, complete genome
KX266300.1	Enterobacteria phage ID11 clone alpha_2A_F5_1, complete genome
DQ079869.1	Enterobacteria phage ID2 Moscow/ID/2001, complete genome. [26-MAY-2017]
NC_001954.1	Enterobacteria phage If1, complete genome
NC_002014.1	Enterobacteria phage Ike, complete genome
HM071924.1	Enterobacteria phage IME08, complete sequence
JN202312.1	Enterobacteria phage ime09, complete genome. [25-AUG-2017]
JF974339.1	Enterobacteria phage IME10, complete genome. [25-AUG-2017]
JN600960.1	Enterobacteria phage IME10, complete genome. [25-AUG-2017]
KM247287.1	Enterobacteria phage J8-65, complete genome. [26-MAY-2017]
KP719134.1	Enterobacteria phage JenK1, complete genome. [26-MAY-2017]
KP719132.1	Enterobacteria phage JenP1, complete genome. [26-MAY-2017]
KP719133.1	Enterobacteria phage JenP2, complete genome. [26-MAY-2017]
JX865427.2	Enterobacteria phage JL1, complete genome. [25-AUG-2017]
EU863409.1	Enterobacteria phage JS10, complete sequence
EF469154.1	Enterobacteria phage JS98, complete genome. [25-AUG-2017]
EU863408.1	Enterobacteria phage JSE, complete genome. [25-AUG-2017]
AY370674.1	Enterobacteria phage K1-5, complete genome. [26-MAY-2017]
AM084415.1	Enterobacteria phage K1E, complete genome. [26-MAY-2017]
AM084414.1	Enterobacteria phage K1F, complete genome. [25-AUG-2017]
HM480846.1	Enterobacteria phage K30, complete genome. [25-AUG-2017]
JX625144.1	Enterobacteria phage M, complete genome. [29-MAY-2015]
NC_003287.2	Enterobacteria phage M13, complete genome
JQ182734.1	Enterobacteria phage mEp043 c-1, complete genome. [26-MAY-2017]
JQ182731.1	Enterobacteria phage mEp235, complete genome. [26-MAY-2017]
JQ182730.1	Enterobacteria phage mEp237, complete genome. [26-MAY-2017]
JQ182727.1	Enterobacteria phage mEpX1, complete genome. [25-AUG-2017]
JQ182726.1	Enterobacteria phage mEpX2, complete genome. [25-AUG-2017]
EU311208.1	Enterobacteria phage Min27, complete genome. [26-MAY-2017]
EF056009.1	Enterobacteria phage N4, complete genome. [26-MAY-2017]
JX867715.1	Enterobacteria phage NJ01,complete sequence
AF234173.1	Enterobacteria phage P1 mod1902::IS5 c1.100 rev dmt(del)MB mutant, complete genome
AF234172.1	Enterobacteria phage P1 mod749::IS5 c1.100 mutant, complete genome
AB426868.1	Enterobacteria phage P22 DNA, complete genome, strain: ATCC 19585-B1. [25-AUG-2017]
AB362338.2	Enterobacteria phage P22 DNA, complete sequence, strain: MSU. [25-AUG-2017]
NC_001609.1	Enterobacteria phage P4, complete genome
KP063541.1	Enterobacteria phage P88, complete genome. [25-AUG-2017]
EF437941.1	Enterobacteria phage Phi1, complete genome. [25-AUG-2017]
GQ422451.1	Enterobacteria phage Phi75, partial genome
JX871397.1	Enterobacteria phage phi80, complete genome. [26-MAY-2017]
FR775895.2	Enterobacteria phage phi92, complete genome [25-AUG-2017]
EU330206.1	Enterobacteria phage phiEco32, complete genome. [25-AUG-2017]
EF460875.1	Enterobacteria phage phiEcoM-GJ1, complete genome. [26-MAY-2017]
DQ126339.2	Enterobacteria phage phiV10, complete genome. [26-MAY-2017]
HM753660.1	Enterobacteria phage phiX174 isolate XC+Mad06im1, complete genome. [26-MAY-2017]
HM753691.1	Enterobacteria phage phiX174 isolate XC+Mad22ic2, complete genome. [26-MAY-2017]
HM753693.1	Enterobacteria phage phiX174 isolate XC+Mad22ic6, complete genome. [26-MAY-2017]
HM753696.1	Enterobacteria phage phiX174 isolate XC+Mad22im1, complete genome. [26-MAY-2017]
HM753699.1	Enterobacteria phage phiX174 isolate XC+Mad22im4, complete genome. [26-MAY-2017]
HM753707.1	Enterobacteria phage phiX174 isolate XC+MbD22ic2, complete genome. [26-MAY-2017]
HM753716.1	Enterobacteria phage phiX174 isolate XC+MbD22im6, complete genome. [26-MAY-2017]
AY848689.1	Enterobacteria phage PRD1, complete genome. [26-MAY-2017]
AY135486.1	Enterobacteria phage PsP3, complete genome. [25-AUG-2017]
KT176190.1	Enterobacteria phage QL01, complete genome
FJ839692.1	Enterobacteria phage RB14, complete genome. [25-AUG-2017]
HM134276.1	Enterobacteria phage RB16, complete genome. [25-AUG-2017]
KM606994.1	Enterobacteria phage RB3, complete genome. [25-AUG-2017]
KM607001.1	Enterobacteria phage RB33, complete genome. [25-AUG-2017]
AY967407.1	Enterobacteria phage RB43, complete genome. [25-AUG-2017]
HE858210.2	Enterobacteria phage RB43, isolate RB43-GVA complete genome [25-AUG-2017]
HE981739.1	Enterobacteria phage RB43, isolate RB43-GVA orf057::gfp complete genome [25-AUG-2017]
AY343333.1	Enterobacteria phage RB49, complete genome
KM606995.1	Enterobacteria phage RB5, complete genome. [25-AUG-2017]
FJ839693.1	Enterobacteria phage RB51, complete genome. [25-AUG-2017]
KM607002.1	Enterobacteria phage RB55, complete genome. [25-AUG-2017]
KM607003.1	Enterobacteria phage RB59, complete genome. [25-AUG-2017]
KM606996.1	Enterobacteria phage RB6, complete genome. [25-AUG-2017]
KM607004.1	Enterobacteria phage RB68, complete genome. [25-AUG-2017]
AY303349.1	Enterobacteria phage RB69, complete genome
KM606997.1	Enterobacteria phage RB7, complete genome. [25-AUG-2017]
KM606998.1	Enterobacteria phage RB9, complete genome. [25-AUG-2017]
KJ832078.1	Enterobacteria phage Sf101, complete genome. [25-AUG-2017]
AF547987.1	Enterobacteria phage Sf6, complete genome. [25-AUG-2017]
JX509734.1	Enterobacteria phage SfI, complete genome. [25-AUG-2017]
KP010268.1	Enterobacteria phage SfMu, complete genome. [25-AUG-2017]
AY288927.2	Enterobacteria phage SP6, complete genome
HQ406778.1	Enterobacteria phage SPC35, complete genome. [25-AUG-2017]
FJ750948.2	Enterobacteria phage SSL-2009a, complete genome. [25-AUG-2017]
GQ149088.1	Enterobacteria phage St-1, complete genome. [26-MAY-2017]
AB102868.1	Enterobacteria phage ST104 DNA, complete genome. [25-AUG-2017]
AY216660.1	Enterobacteria phage T1, complete genome. [25-AUG-2017]
KC960671.1	Enterobacteria phage T3, complete genome
KJ477685.1	Enterobacteria phage T4 strain 147, complete genome. [25-AUG-2017]
KJ477686.1	Enterobacteria phage T4 strain GT7, complete genome. [25-AUG-2017]
KJ477684.1	Enterobacteria phage T4 strain wild, complete genome. [25-AUG-2017]
AF158101.6	Enterobacteria phage T4, complete genome. [25-AUG-2017]
HM137666.1	Enterobacteria phage T4T, complete genome. [25-AUG-2017]
AY264774.1	Enterobacteria phage T7, complete genome
NC_001604.1	Enterobacteria phage T7, complete genome
GU071091.1	Enterobacteria phage T7, complete genome. [25-AUG-2017]
JX421753.1	Enterobacteria phage T7M, complete genome. [25-AUG-2017]
GQ422450.1	Enterobacteria phage UAB_Phi20, complete genome
JN986846.1	Enterobacteria phage vB_EcoM_ACG-C40, complete genome. [25-AUG-2017]
KP007360.1	Enterobacteria phage vB_EcoM_VR20, complete genome. [25-AUG-2017]
KP007361.1	Enterobacteria phage vB_EcoM_VR25, complete genome. [25-AUG-2017]
KP007362.1	Enterobacteria phage vB_EcoM_VR26, complete genome. [25-AUG-2017]
KP007359.1	Enterobacteria phage vB_EcoM_VR5, complete genome. [25-AUG-2017]
JQ031132.1	Enterobacteria phage vB_EcoM-FV3, complete genome. [25-AUG-2017]
HM563683.1	Enterobacteria phage vB_EcoM-VR7, complete genome. [25-AUG-2017]
JN986844.1	Enterobacteria phage vB_EcoP_ACG-C91, complete genome. [26-MAY-2017]
JN986845.1	Enterobacteria phage vB_EcoS_ACG-M12, complete genome. [25-AUG-2017]
KX130668.1	Enterobacteria phage vB_EcoS_NBD2, complete genome
JQ182736.1	Enterobacteria phage vB_EcoS_Rogue1, complete genome
JQ513383.1	Enterobacteria phage vB_KleM-RaK2, complete genome. [25-AUG-2017]
AP000422.1	Enterobacteria phage VT2-Sakai genomic DNA, prophage inserted region in Escherichia coli O157:H7
AP000363.1	Enterobacteria phage VT2-Sakai proviral DNA, complete genome. [26-MAY-2017]
JQ182733.1	Enterobacterial phage mEp213, complete genome. [26-MAY-2017]
JQ182732.1	Enterobacterial phage mEp234, complete genome. [25-AUG-2017]
JQ182729.1	Enterobacterial phage mEp390, complete genome. [25-AUG-2017]
JN225449.1	Enterobacteriaphage UAB_Phi87, complete genome. [25-AUG-2017]
NC_001417.2	Enterobacterio phage MS2, complete genome
AB712291.1	Enterococcus phage BC-611 DNA, complete genome. [25-AUG-2017]
KJ801817.1	Enterococcus phage ECP3, complete genome. [25-AUG-2017]
KR131750.1	Enterococcus phage Ec-ZZ2, complete genome
MF001358.1	Enterococcus phage EF1, partial genome
CP002495.1	Enterococcus phage EF62phi, complete genome. [25-AUG-2017]
JX193904.1	Enterococcus phage EfaCPT1, complete genome. [25-AUG-2017]
FJ792813.1	Enterococcus phage EFAP-1, complete genome. [25-AUG-2017]
KJ608188.1	Enterococcus phage EFC-1, complete genome. [26-MAY-2017]
KP339049.1	Enterococcus phage EFDG1, complete genome. [25-AUG-2017]
KR049063.1	Enterococcus phage EFLK1, complete genome. [25-AUG-2017]
GU815339.1	Enterococcus phage EFRM31, complete genome. [25-AUG-2017]
KF728385.2	Enterococcus phage IME_EF3, complete genome. [25-AUG-2017]
KF733017.1	Enterococcus phage IME-EF4, complete genome. [25-AUG-2017]
KJ010489.1	Enterococcus phage IME-EFm1, complete genome. [25-AUG-2017]
KT588072.1	Enterococcus phage IME-EFm5, complete genome
GQ452243.1	Enterococcus phage phiEf11, complete genome. [25-AUG-2017]
AP009390.1	Enterococcus phage phiEF24C DNA, complete genome. [25-AUG-2017]
GQ478081.1	Enterococcus phage phiFL1A, complete genome. [25-AUG-2017]
GQ478082.1	Enterococcus phage phiFL1B, complete genome. [25-AUG-2017]
GQ478083.1	Enterococcus phage phiFL1C, complete genome. [25-AUG-2017]
GQ478084.1	Enterococcus phage phiFL2A, complete genome. [25-AUG-2017]
GQ478085.1	Enterococcus phage phiFL2B, complete genome. [25-AUG-2017]
GQ478086.1	Enterococcus phage phiFL3A, complete genome. [25-AUG-2017]
GQ478087.1	Enterococcus phage phiFL3B, complete genome. [25-AUG-2017]
GQ478088.1	Enterococcus phage phiFL4A, complete genome. [26-MAY-2017]
KX284704.1	Enterococcus phage SANTOR1, complete genome
JQ309827.1	Enterococcus phage vB_Efae230P-4, complete genome. [11-NOV-2016]
KT932700.1	Enterococcus phage vB_EfaP_IME195, complete genome
KT932701.1	Enterococcus phage vB_EfaS_IME196, complete genome
KT945994.2	Enterococcus phage vB_EfaS_IME197, complete genome
KT932699.1	Enterococcus phage vB_EfaS_IME198, complete genome
KJ094032.2	Enterococcus phage VD13, complete genome. [25-AUG-2017]
KJ127303.1	Enterococcus phage VD13, complete genome. [25-AUG-2017]
LT546030.1	Enterococcus phage VPE25 genome assembly, chromosome: I
EF160123.1	Erwinia amylovora phage Era103, complete genome. [26-MAY-2017]
FQ482086.1	Erwinia amylovora phage phiEa100 complete genome. [26-MAY-2017]
FQ482083.1	Erwinia amylovora phage phiEa104 complete genome. [25-AUG-2017]
KF806589.1	Erwinia phage Ea35-70, complete genome. [26-MAY-2017]
KF806588.1	Erwinia phage Ea9-2, complete genome. [25-AUG-2017]
HQ110084.1	Erwinia phage ENT90, complete genome. [25-AUG-2017]
KF700371.1	Erwinia phage FE44, complete genome. [25-AUG-2017]
JN585957.1	Erwinia phage PEp14, complete genome. [26-MAY-2017]
EU710883.1	Erwinia phage phiEa21-4, complete genome. [25-AUG-2017]
KP037007.1	Erwinia phage phiEa2809, complete genome. [25-AUG-2017]
KF623294.1	Erwinia phage PhiEaH1, complete genome
JX316028.1	Erwinia phage phiEaH2, complete genome. [26-MAY-2017]
KX397365.1	Erwinia phage vB_EamM_Caitlin, complete genome
KX397366.1	Erwinia phage vB_EamM_ChrisDB, complete genome
KX397367.1	Erwinia phage vB_EamM_EarlPhillipIV, complete genome
KX397368.1	Erwinia phage vB_EamM_Huxley, complete genome
KX397369.1	Erwinia phage vB_EamM_Kwan, complete genome
KX397370.1	Erwinia phage vB_EamM_Machina, complete genome
KX397372.1	Erwinia phage vB_EamM_Phobos, complete genome
KU886223.1	Erwinia phage vB_EamM_Simmy50, complete genome
KU886222.1	Erwinia phage vB_EamM_Special G, complete genome
HQ728264.1	Erwinia phage vB_EamM-Y2, complete genome. [25-AUG-2017]
KX098389.2	Erwinia phage vB_EamP_Frozen, complete genome
HQ728265.1	Erwinia phage vB_EamP-L1, complete genome. [25-AUG-2017]
HQ728266.1	Erwinia phage vB_EamP-S6, complete genome. [25-AUG-2017]
FQ482085.1	Erwinia tasmaniensis phage phiEt88 complete genome. [25-AUG-2017]
KR816341.1	Erysipelothrix phage SE-1, complete genome
DQ832317.1	Escherichia coli bacteriophage rv5, complete sequence
KP869100.1	Escherichia coli O157 typing phage 1, complete genome. [25-AUG-2017]
KP869108.1	Escherichia coli O157 typing phage 10, complete genome. [26-MAY-2017]
KP869109.1	Escherichia coli O157 typing phage 11, complete genome. [25-AUG-2017]
KP869110.1	Escherichia coli O157 typing phage 12, complete genome. [25-AUG-2017]
KP869101.1	Escherichia coli O157 typing phage 3, complete genome. [25-AUG-2017]
KP869103.1	Escherichia coli O157 typing phage 5, complete genome. [25-AUG-2017]
KP869104.1	Escherichia coli O157 typing phage 6, complete genome. [25-AUG-2017]
LN997803.1	Escherichia coli phage phi467
KM507819.1	Escherichia phage 121Q, complete genome. [25-AUG-2017]
KP308307.1	Escherichia phage 172-1, complete genome. [25-AUG-2017]
KC690136.1	Escherichia phage 2 JES-2013, complete genome. [25-AUG-2017]
JX912252.1	Escherichia phage ADB-2, complete genome. [25-AUG-2017]
KR422352.1	Escherichia phage APCEc01, complete genome
KM190144.1	Escherichia phage Av-05, complete genome. [25-AUG-2017]
KF771237.1	Escherichia phage bV_EcoS_AHP42, complete genome. [25-AUG-2017]
KF771238.1	Escherichia phage bV_EcoS_AHS24, complete genome. [25-AUG-2017]
HQ665011.1	Escherichia phage bV_EcoS_AKFV33, complete genome. [25-AUG-2017]
KF771239.1	Escherichia phage bV_EcoS_AKS96, complete genome. [25-AUG-2017]
KM242061.1	Escherichia phage CICC 80001, complete genome. [25-AUG-2017]
GQ357916.1	Escherichia phage D108, complete genome. [25-AUG-2017]
KJ668714.2	Escherichia phage e11/2, complete genome. [25-AUG-2017]
KJ668713.1	Escherichia phage e4/1c, complete genome. [25-AUG-2017]
JX560968.1	Escherichia phage EC6, complete genome. [25-AUG-2017]
JX415535.1	Escherichia phage ECBP1, complete genome. [25-AUG-2017]
JX415536.1	Escherichia phage ECBP2, complete genome. [25-AUG-2017]
KJ749827.1	Escherichia phage ECBP5, complete genome. [26-MAY-2017]
JX128258.1	Escherichia phage ECML-117, complete genome. [25-AUG-2017]
JX128259.1	Escherichia phage ECML-134, complete genome. [25-AUG-2017]
JX128257.1	Escherichia phage ECML-4, complete genome. [25-AUG-2017]
KX534335.1	Escherichia phage Envy, complete genome
KX534336.1	Escherichia phage Gluttony, complete genome
HM208537.1	Escherichia phage HK639, complete genome. [26-MAY-2017]
HM173637.1	Escherichia phage HK75, complete genome. [25-AUG-2017]
KF925357.1	Escherichia phage HY01, complete genome. [25-AUG-2017]
KM092515.1	Escherichia phage HY02, complete genome
KR269718.1	Escherichia phage HY03, complete genome
KF055347.1	Escherichia phage JH2, complete genome. [25-AUG-2017]
GU196277.1	Escherichia phage K1G, complete genome. [25-AUG-2017]
GU196278.1	Escherichia phage K1H, complete genome. [25-AUG-2017]
KF981730.1	Escherichia phage KBNP1711, complete genome. [25-AUG-2017]
LT594300.1	Escherichia phage LM33_P1 genome assembly, chromosome: I
KX534338.1	Escherichia phage Lust, complete genome
KC801932.2	Escherichia phage Lw1, complete genome. [25-AUG-2017]
KU878969.1	Escherichia phage MX01, complete genome
HG803182.1	Escherichia phage P13363 complete genome
HE664024.1	Escherichia phage P13374 complete proviral genome
HG792104.1	Escherichia phage P13771, complete genome
HG792102.1	Escherichia phage P13803, complete genome
HG792105.1	Escherichia phage P14437, complete genome
KP090453.1	Escherichia phage P483, complete genome. [25-AUG-2017]
KP090454.1	Escherichia phage P694, complete genome. [25-AUG-2017]
HG792103.1	Escherichia phage P8983, complete genome
KP682375.1	Escherichia phage PA11, complete genome
KP682376.1	Escherichia phage PA12, complete genome
KP682377.1	Escherichia phage PA16, complete genome
KP682371.1	Escherichia phage PA2, complete genome
KP682379.1	Escherichia phage PA21, complete genome
KP682380.1	Escherichia phage PA27, complete genome
KP682381.1	Escherichia phage PA28, complete genome
KP682382.1	Escherichia phage PA29, complete genome
KP682384.1	Escherichia phage PA32, complete genome
KP682386.1	Escherichia phage PA36, complete genome
KP682372.1	Escherichia phage PA4, complete genome
KP682387.1	Escherichia phage PA42, complete genome
KP682389.1	Escherichia phage PA45, complete genome
KP682373.1	Escherichia phage PA5, complete genome
KP682390.1	Escherichia phage PA50, complete genome
KP682392.1	Escherichia phage PA52, complete genome
KP682374.1	Escherichia phage PA8, complete genome
KC295538.1	Escherichia phage PBECO 4, complete genome. [25-AUG-2017]
KJ748011.1	Escherichia phage PE3-1, complete genome. [26-MAY-2017]
KR233165.1	Escherichia phage PEC04, complete genome
JX561091.1	Escherichia phage phAPEC8, complete genome. [26-MAY-2017]
JN673056.1	Escherichia phage PhaxI, complete genome. [25-AUG-2017]
JF770475.1	Escherichia phage phiEB49, complete genome. [25-AUG-2017]
JN882298.1	Escherichia phage phiKT, complete genome. [26-MAY-2017]
KM236242.1	Escherichia phage Pollock, complete genome. [25-AUG-2017]
KX534341.1	Escherichia phage Pride, complete genome
KR073660.1	Escherichia phage pro147, complete genome
KR073661.1	Escherichia phage pro483, complete genome
KM236243.1	Escherichia phage Seurat, complete genome. [26-MAY-2017]
KX534339.1	Escherichia phage Sloth, partial genome
LN881725.1	Escherichia phage slur01, complete genome
LN881726.1	Escherichia phage slur02, complete genome
LN881728.1	Escherichia phage slur03, complete genome
LN881729.1	Escherichia phage slur04, complete genome
LN881730.1	Escherichia phage slur05, complete genome
LN881731.1	Escherichia phage slur06, complete genome
LN881732.1	Escherichia phage slur07, complete genome
LN881733.1	Escherichia phage slur08, complete genome
LN887948.1	Escherichia phage slur09 genome assembly slu09, chromosome : 1
LN881734.1	Escherichia phage slur11, complete genome
LN881735.1	Escherichia phage slur12, complete genome
LN881737.1	Escherichia phage slur13, complete genome
LN881736.1	Escherichia phage slur14, complete genome
LN881727.1	Escherichia phage slur16, complete genome
LN881738.1	Escherichia phage slur17, complete genome
KT454805.2	Escherichia phage SUSP1, complete genome
KT454806.2	Escherichia phage SUSP2, complete genome
JQ011318.1	Escherichia phage TL-2011c, complete genome. [26-MAY-2017]
KX009778.3	Escherichia phage UFV-AREG1, complete genome
KX377933.1	Escherichia phage vB_EcoM_Alf5, complete genome
KR014248.1	Escherichia phage vB_EcoM_AYO145A, complete genome. [25-AUG-2017]
GU903191.1	Escherichia phage vB_EcoM_ECO1230-10, complete genome. [25-AUG-2017]
KJ190158.1	Escherichia phage vB_EcoM_FFH2, complete genome. [25-AUG-2017]
KF582788.2	Escherichia phage vB_EcoM_JS09, complete genome. [25-AUG-2017]
KF562341.1	Escherichia phage vB_EcoM_PhAPEC2, complete genome. [25-AUG-2017]
KM360178.1	Escherichia phage vB_EcoM-ep3, complete genome. [25-AUG-2017]
KU867876.1	Escherichia phage vB_EcoM-UFV13, complete genome
KM657822.1	Escherichia phage vB_EcoM-VpaE1, complete genome. [25-AUG-2017]
HQ259105.1	Escherichia phage vB_EcoP_G7C, complete genome. [25-AUG-2017]
KT990215.1	Escherichia phage vB_EcoP_GA2A, complete genome
KF192075.1	Escherichia phage vB_EcoP_PhAPEC5, complete genome. [26-MAY-2017]
KF562340.1	Escherichia phage vB_EcoP_PhAPEC7, complete genome. [26-MAY-2017]
KJ190157.1	Escherichia phage vB_EcoS_FFH1, complete genome. [25-AUG-2017]
KU878968.1	Escherichia phage WG01, complete genome
HM997020.1	Escherichia phage wV7, complete genome. [25-AUG-2017]
KM896878.1	Escherichia phage YD-2008.s, complete genome. [25-AUG-2017]
KJ909655.1	Escherichia Stx1-converting recombinant phage HUN/2013, complete genome. [26-MAY-2017]
JN593240.1	Escherichia virus CBA120, complete genome. [12-SEP-2017]
KU599889.1	Flavobacterium phage 1H, complete genome
KU599887.1	Flavobacterium phage 2A, complete genome
KM873719.2	Flavobacterium phage FCL-2, complete genome. [27-MAY-2016]
KY979235.1	Flavobacterium phage FCV-1, complete genome
KY951964.1	Flavobacterium phage FCV-11, complete genome
KY979237.1	Flavobacterium phage FCV-16, complete genome
KY951963.1	Flavobacterium phage FCV-3, complete genome
KU599877.1	Flavobacterium phage Fpv1, complete genome
KU599884.1	Flavobacterium phage Fpv10, complete genome
KU599885.1	Flavobacterium phage Fpv11, complete genome
NC_031945.1	Flavobacterium phage Fpv11, complete genome
KU599878.1	Flavobacterium phage Fpv2, complete genome
KU599886.1	Flavobacterium phage Fpv20, complete genome
KT876726.1	Flavobacterium phage FpV21, complete genome
KU599879.1	Flavobacterium phage Fpv3, complete genome
KU599881.1	Flavobacterium phage Fpv6, complete genome
KU599882.1	Flavobacterium phage Fpv7, complete genome
KT876725.1	Flavobacterium phage FpV9, complete genome
KY979239.1	Flavobacterium phage V156, complete genome
KY979241.1	Flavobacterium phage V165, complete genome
KY992519.1	Flavobacterium phage V175, complete genome
KY979242.1	Flavobacterium phage V182, complete genome
KY979244.1	Flavobacterium phage VK42, complete genome
KY979245.1	Flavobacterium phage VK48, complete genome
KY979247.1	Flavobacterium phage VK58, complete genome
KY979238.1	Flavoibacterium phage FCV-20, complete genome
AY370762.1	Fusellovirus SSV2, complete genome
KJ159566.1	Geobacillus phage GBK2, complete genome
DQ340064.2	Geobacillus phage GBSV1, complete genome. [25-AUG-2017]
DQ453159.1	Geobacillus virus E2, complete genome
NC_009552.2	Geobacillus virus E2, complete genome
KP144388.1	Geobacillus virus E3, complete genome
KM589498.1	Gokushovirinae Bog1183_53, complete genome
KM589501.1	Gokushovirinae Bog5712_52, complete genome
KM589502.1	Gokushovirinae Bog8989_22, complete genome
KM589508.1	Gokushovirinae Fen672_31, complete genome
KM589511.1	Gokushovirinae Fen7875_21, complete genome
KU963247.1	Gordonia phage Attis, complete genome
KU998247.1	Gordonia phage Bachita, complete genome
KX557272.1	Gordonia phage Bantam, complete genome
KX557273.1	Gordonia phage BatStarr, complete genome
KU963263.1	Gordonia phage BaxterFox, complete genome
KU963261.1	Gordonia phage BetterKatz, complete genome
KU998236.1	Gordonia phage Blueberry, complete genome
KU998235.1	Gordonia phage Bowser, complete genome
KU998233.1	Gordonia phage BritBrat, complete genome
KX557274.1	Gordonia phage CaptainKirk2, complete genome
KX557275.1	Gordonia phage CarolAnn, complete genome
KU998246.1	Gordonia phage ClubL, complete genome
KU998239.1	Gordonia phage Cozz, complete genome
KX557276.1	Gordonia phage Cucurbita, complete genome
KU998242.1	Gordonia phage Demosthenes, complete genome
KU963260.1	Gordonia phage Emalyn, complete genome
KR053194.1	Gordonia phage GAL1, complete genome
KX557278.1	Gordonia phage Ghobes, complete genome
KR063279.1	Gordonia phage GMA3, complete genome
KR053199.1	Gordonia phage GMA4, complete genome
KR053198.1	Gordonia phage GMA5, complete genome
KR063280.1	Gordonia phage GMA6, complete genome
KR063278.1	Gordonia phage GMA7, complete genome
KP790009.1	Gordonia phage Gmala1, complete genome. [26-MAY-2017]
KP790010.1	Gordonia phage GordDuk1, complete genome. [26-MAY-2017]
KP790008.1	Gordonia phage GordTnk2, complete genome. [26-MAY-2017]
JF923797.1	Gordonia phage GRU1, complete genome. [26-MAY-2017]
KR053197.1	Gordonia phage GRU3, complete genome
KP790011.1	Gordonia phage Gsput1, complete genome. [25-AUG-2017]
HQ403646.1	Gordonia phage GTE2, complete sequence
JF923796.1	Gordonia phage GTE5, complete genome. [26-MAY-2017]
KR053200.1	Gordonia phage GTE6, complete genome
JN035618.1	Gordonia phage GTE7, complete genome. [26-MAY-2017]
KR053201.1	Gordonia phage GTE8, complete genome
KX557279.1	Gordonia phage Hedwig, complete genome
KU963245.1	Gordonia phage Hotorobo, complete genome
KU998256.1	Gordonia phage Jeanie, complete genome
KX557280.1	Gordonia phage JSwag, complete genome
KX557281.1	Gordonia phage Jumbo, complete genome
KU998254.1	Gordonia phage Kampe, complete genome
KU998251.1	Gordonia phage KatherineG, complete genome
KU963257.1	Gordonia phage Kita, complete genome
KU998243.1	Gordonia phage Kvothe, complete genome
KU963256.1	Gordonia phage Lucky10, complete genome
KU998255.1	Gordonia phage McGonagall, complete genome
KU998241.1	Gordonia phage Monty, complete genome
KX557282.1	Gordonia phage Nyceirae, complete genome
KU963255.1	Gordonia phage Nymphadora, complete genome
KU963254.1	Gordonia phage Obliviate, complete genome
KU998245.1	Gordonia phage OneUp, complete genome
KU998253.1	Gordonia phage Orchid, complete genome
KU998252.1	Gordonia phage PatrickStar, complete genome
KU963253.2	Gordonia phage Phinally, complete genome
KX557283.1	Gordonia phage Remus, complete genome
KU998250.1	Gordonia phage Rosalind, complete genome
KU998244.1	Gordonia phage Smoothie, complete genome
KU963246.1	Gordonia phage SoilAssassin, complete genome
KU998249.1	Gordonia phage Soups, complete genome
KX557285.1	Gordonia phage Terapin, complete genome
KX557286.1	Gordonia phage Twister6, complete genome
KU963251.1	Gordonia phage UmaThurman, complete genome
KU998248.1	Gordonia phage Utz, complete genome
KU998237.1	Gordonia phage Vendetta, complete genome
KU963250.1	Gordonia phage Vivi2, complete genome
KU998234.1	Gordonia phage Wizard, complete genome
KU998240.1	Gordonia phage Woes, complete genome
KU963249.1	Gordonia phage Yeezy, complete genome
KU963248.1	Gordonia phage Yvonnetastic, complete genome
KX557287.1	Gordonia phage Zirinka, complete genome
NC_001998.1	Guinea pig Chlamydia phage, complete genome
AY027935.1	Haemophilus influenzae phage HP2, complete genome. [25-AUG-2017]
NC_001697.1	Haemophilus phage HP1, complete genome
JF832915.1	Haemophilus phage SuMu, complete sequence
KT809302.1	Haloarcula californiae icosahedral virus 1, complete genome
JN968479.1	Haloarcula hispanica icosahedral virus 2, complete genome
GU321093.1	Haloarcula hispanica pleomorphic virus 1, complete genome
KF056323.1	Haloarcula hispanica pleomorphic virus 2, complete genome
AY950802.1	Haloarcula phage SH1, complete genome
JQ340088.1	Halocynthia phage JM-2012, complete genome. [26-MAY-2017]
JN882267.1	Halogeometricum pleomorphic virus 1, complete genome
EU399241.1	Halomonas phage phiHAP-1, complete genome. [25-AUG-2017]
HQ332141.1	Halorubrum phage CGphi46 genomic sequence
AF222060.1	Halorubrum phage HF2, complete genome
FJ685651.1	Halorubrum pleomorphic virus 1, complete genome
JN882264.1	Halorubrum pleomorphic virus 2, complete genome
JN882265.1	Halorubrum pleomorphic virus 3, complete genome
JN882266.1	Halorubrum pleomorphic virus 6, complete genome
KC292029.1	Halovirus HCTV-1, complete genome
KC292028.1	Halovirus HCTV-2, complete genome
KC292027.1	Halovirus HCTV-5, complete genome
AY190604.1	Halovirus HF1, complete genome
KC292026.1	Halovirus HGTV-1, complete genome
KC292025.1	Halovirus HHTV-1, complete genome
KC292024.1	Halovirus HHTV-2, complete genome
KC292023.1	Halovirus HRTV-4, complete genome
KC292022.1	Halovirus HRTV-5, complete genome
KC292021.1	Halovirus HRTV-7, complete genome
KC292020.1	Halovirus HRTV-8, complete genome
KC117378.1	Halovirus HSTV-1, complete genome
KC117376.1	Halovirus HSTV-2, complete genome
KC117377.1	Halovirus HVTV-1, complete genome
KC252997.1	Halovirus PH1, complete genome
JQ617284.1	Helicobacter phage 1961P, complete genome. [26-MAY-2017]
KX119200.1	Helicobacter phage FrMEG235U, complete genome
AB647160.1	Helicobacter phage KHP30 DNA, complete genome. [26-MAY-2017]
AB731695.1	Helicobacter phage KHP40 DNA, complete genome. [26-MAY-2017]
JF734911.1	Helicobacter phage phiHP33, complete genome. [26-MAY-2017]
KX119174.1	Helicobacter phage UKEN31U, complete genome
KX119206.1	Helicobacter phage UKEN32U, complete genome
AF191796.1	His1 virus, complete genome
AF191797.1	His2 virus, complete genome
KJ847052.1	Idiomarinaceae phage 1N2-2, complete genome. [25-AUG-2017]
EU876853.1	Iodobacteriophage phiPLPE, complete genome. [25-AUG-2017]
AB797215.1	Klebsiella phage 0507-KN2-1 DNA, complete genome. [25-AUG-2017]
KP658157.1	Klebsiella phage 1513, complete genome. [25-AUG-2017]
KF765493.2	Klebsiella phage F19, complete genome. [25-AUG-2017]
JX866719.1	Klebsiella phage JD001, complete genome. [25-AUG-2017]
KT239446.1	Klebsiella phage JD18, complete genome
EU734173.1	Klebsiella phage K11, complete genome. [25-AUG-2017]
KR149291.1	Klebsiella phage K5, complete genome
KR262148.1	Klebsiella phage KLPN1, complete genome
GU295964.1	Klebsiella phage KP15, complete genome. [25-AUG-2017]
HQ918180.1	Klebsiella phage KP27, complete genome. [25-AUG-2017]
GQ413937.1	Klebsiella phage KP32, complete genome. [25-AUG-2017]
GQ413938.2	Klebsiella phage KP34, complete genome. [26-MAY-2017]
JF501022.1	Klebsiella phage KP36, complete genome. [25-AUG-2017]
MF415410.1	Klebsiella phage KPN N137, complete genome
MF415411.1	Klebsiella phage KPN U2874, complete genome
KT001918.1	Klebsiella phage Matisse, complete genome
AB716666.1	Klebsiella phage NTUH-K2044-K1-1 DNA, complete genome. [25-AUG-2017]
KR269720.1	Klebsiella phage PKO111, complete genome
KR269719.1	Klebsiella phage PKP126, complete genome
KT001920.1	Klebsiella phage Sushi, complete genome
KT367885.1	Klebsiella phage vB_Kp1, complete genome
KT367886.1	Klebsiella phage vB_Kp2, complete genome
KT934943.1	Klebsiella phage vB_KpnM_KB57, complete genome
KX258185.1	Klebsiella phage vB_KpnM_KpV477, complete genome
LN866626.1	Klebsiella phage vB_KpnP_KpV289, complete genome
KT964103.1	Klebsiella phage vB_KpnP_KpV41, complete genome
KX211991.1	Klebsiella phage vB_KpnP_KpV475, complete genome
KU666550.1	Klebsiella phage vB_KpnP_KpV71, complete genome
KP708986.1	Klebsiella phage vB_KpnP_SU552A, complete genome. [25-AUG-2017]
FJ194439.1	Kluyvera phage Kvp1, complete sequence
AJ131519.1	Lactobacillus bacteriophage phi adh complete genome [25-AUG-2017]
AJ251789.2	Lactobacillus casei bacteriophage A2 complete genome
AF195902.3	Lactobacillus johnsonii prophage Lj771, complete genome
AY459533.1	Lactobacillus johnsonii prophage Lj928, complete genome
AY459535.1	Lactobacillus johnsonii prophage Lj965, complete genome
JX486087.1	Lactobacillus phage ATCC 8014-B1, complete genome. [25-AUG-2017]
EU340421.2	Lactobacillus phage c5, complete genome. [25-AUG-2017]
KR905067.1	Lactobacillus phage CL2, complete genome
KR905068.1	Lactobacillus phage iA2, complete genome
KR905070.1	Lactobacillus phage iLp1308, complete genome
KR905069.1	Lactobacillus phage iLp84, complete genome
EU409559.1	Lactobacillus phage JCL1032, complete genome. [26-MAY-2017]
DQ320509.1	Lactobacillus phage KC5a, complete genome. [25-AUG-2017]
FJ822135.1	Lactobacillus phage Lb338-1, complete genome. [25-AUG-2017]
KJ564037.1	Lactobacillus phage Ld17, complete genome. [25-AUG-2017]
KJ564036.1	Lactobacillus phage Ld25A, complete genome. [25-AUG-2017]
KJ564038.1	Lactobacillus phage Ld3, complete genome. [25-AUG-2017]
KM514685.1	Lactobacillus phage Ldl1, complete genome. [25-AUG-2017]
HQ141410.1	Lactobacillus phage LF1, complete genome. [25-AUG-2017]
KP054477.1	Lactobacillus phage LfeInf, complete genome. [25-AUG-2017]
KP027015.1	Lactobacillus phage LfeSau, complete genome. [25-AUG-2017]
EF455602.1	Lactobacillus phage LL-H, complete genome. [25-AUG-2017]
AY739900.2	Lactobacillus phage LL-Ku, complete genome. [25-AUG-2017]
EU246945.1	Lactobacillus phage Lrm1, complete sequence
EU871039.1	Lactobacillus phage Lv-1, complete genome
KF767351.1	Lactobacillus phage phi jlb1, complete genome. [25-AUG-2017]
NC_004305.1	Lactobacillus phage phig1e, complete genome
KF188409.1	Lactobacillus phage phiJB, complete genome. [25-AUG-2017]
KF188410.1	Lactobacillus phage phiLdb, complete genome. [25-AUG-2017]
GU323708.1	Lactobacillus phage phiPYB5, complete genome. [25-AUG-2017]
KC171647.1	Lactobacillus phage PL-1, complete genome. [25-AUG-2017]
KU848187.1	Lactobacillus phage PLE2, complete genome
KU848186.1	Lactobacillus phage PLE3, complete genome
HQ141411.1	Lactobacillus phage Sha1, complete genome. [26-MAY-2017]
AY236756.1	Lactobacillus plantarum bacteriophage phiJL-1, complete genome. [25-AUG-2017]
AF195901.1	Lactobacillus prophage Lj928 late gene cluster sequence
KJ528544.1	Lactoccocus phage WP-2, complete genome. [26-MAY-2017]
AF489521.1	Lactococcus bacteriophage 4268, complete genome
KC182543.1	Lactococcus lactis phage 645, complete genome. [25-AUG-2017]
DQ227764.1	Lactococcus lactis phage jj50, complete genome. [25-AUG-2017]
DQ535032.1	Lactococcus lactis phage KSY1, complete genome. [26-MAY-2017]
KX379669.1	Lactococcus phage 10W22S, complete genome
GQ403788.1	Lactococcus phage 1358, complete sequence
EU081845.1	Lactococcus phage 1706, complete genome. [25-AUG-2017]
KX456206.1	Lactococcus phage 28201, complete genome
KC182542.1	Lactococcus phage 340, complete genome. [25-AUG-2017]
KX379666.1	Lactococcus phage 3R16S, complete genome
KX456207.1	Lactococcus phage 50101, complete genome
KX456208.1	Lactococcus phage 50901, complete genome
KX456210.1	Lactococcus phage 62501, complete genome
KX456211.1	Lactococcus phage 63301, complete genome
DQ227763.1	Lactococcus phage 712, complete genome. [25-AUG-2017]
KX456212.1	Lactococcus phage 86501, complete genome
KP793121.1	Lactococcus phage 936 group phage Phi109, complete genome
KP793115.1	Lactococcus phage 936 group phage Phi114, complete genome
KP793116.1	Lactococcus phage 936 group phage Phi13.16, complete genome
KP793114.1	Lactococcus phage 936 group phage Phi17, complete genome
KP793105.1	Lactococcus phage 936 group phage Phi19.3, complete genome
KP793101.1	Lactococcus phage 936 group phage Phi4, complete genome
KP793120.1	Lactococcus phage 936 group phage PhiL.18, complete genome
HM029250.1	Lactococcus phage 949, complete genome. [25-AUG-2017]
KX456213.1	Lactococcus phage 98201, complete genome
KY554768.1	Lactococcus phage AM1, complete genome
KY554775.1	Lactococcus phage AM11, complete genome
KY554776.1	Lactococcus phage AM12, complete genome
KY554769.1	Lactococcus phage AM2, complete genome
KY554770.1	Lactococcus phage AM3, complete genome
KY554771.1	Lactococcus phage AM4, complete genome
KY554772.1	Lactococcus phage AM5, complete genome
KY554773.1	Lactococcus phage AM8, complete genome
KY554774.1	Lactococcus phage AM9, complete genome
JQ740787.1	Lactococcus Phage ASCC191, complete genome. [25-AUG-2017]
JQ740788.1	Lactococcus Phage ASCC273, complete genome. [25-AUG-2017]
JQ740789.1	Lactococcus Phage ASCC281, complete genome. [25-AUG-2017]
JQ740790.1	Lactococcus Phage ASCC284, complete genome. [25-AUG-2017]
JQ740791.1	Lactococcus Phage ASCC287, complete genome. [25-AUG-2017]
JQ740792.1	Lactococcus Phage ASCC310, complete genome. [25-AUG-2017]
JQ740793.1	Lactococcus Phage ASCC324, complete genome. [25-AUG-2017]
JQ740794.1	Lactococcus Phage ASCC337, complete genome. [25-AUG-2017]
JQ740796.1	Lactococcus Phage ASCC358, complete genome. [25-AUG-2017]
JQ740797.1	Lactococcus Phage ASCC365, complete genome. [25-AUG-2017]
JQ740798.1	Lactococcus Phage ASCC368, complete genome. [25-AUG-2017]
JQ740799.1	Lactococcus Phage ASCC395, complete genome. [25-AUG-2017]
JQ740801.1	Lactococcus Phage ASCC406, complete genome. [25-AUG-2017]
JQ740802.1	Lactococcus Phage ASCC454, complete genome. [25-AUG-2017]
JQ740803.1	Lactococcus Phage ASCC460, complete genome. [25-AUG-2017]
JQ740804.1	Lactococcus Phage ASCC465, complete genome. [25-AUG-2017]
JQ740806.1	Lactococcus Phage ASCC476, complete genome. [25-AUG-2017]
JQ740809.1	Lactococcus Phage ASCC502, complete genome. [25-AUG-2017]
JQ740810.1	Lactococcus Phage ASCC506, complete genome. [25-AUG-2017]
JQ740811.1	Lactococcus Phage ASCC527, complete genome. [25-AUG-2017]
EU438902.1	Lactococcus phage asccphi28, complete genome. [26-MAY-2017]
EU221285.1	Lactococcus phage bIBB29, complete genome. [25-AUG-2017]
AF176025.1	Lactococcus phage BK5-T, complete genome. [26-MAY-2017]
JX567312.1	Lactococcus phage BM13, complete genome. [26-MAY-2017]
FJ848882.1	Lactococcus phage CB13, complete genome. [25-AUG-2017]
FJ848883.1	Lactococcus phage CB14, complete genome. [25-AUG-2017]
MG309717.1	Lactococcus phage CB14a, complete genome
MG309718.1	Lactococcus phage CB14b, complete genome
FJ848884.1	Lactococcus phage CB19, complete genome. [25-AUG-2017]
FJ848885.1	Lactococcus phage CB20, complete genome. [25-AUG-2017]
KX373685.1	Lactococcus phage D4410, complete genome
KX373686.1	Lactococcus phage D4412, complete genome
KT339177.1	Lactococcus phage GE1, complete genome
KC182546.1	Lactococcus phage jm2, complete genome. [25-AUG-2017]
KC182547.1	Lactococcus phage jm3, complete genome. [25-AUG-2017]
MF775687.1	Lactococcus phage LP0004a, complete genome
MF775688.1	Lactococcus phage LP0004b, complete genome
MF775689.1	Lactococcus phage LP0004c, complete genome
MF775690.1	Lactococcus phage LP0004d, complete genome
MF775692.1	Lactococcus phage LP0202, complete genome
MF775699.1	Lactococcus phage LP1005, complete genome
MF775700.1	Lactococcus phage LP1011, complete genome
MF775701.1	Lactococcus phage LP1110, complete genome
MF775675.1	Lactococcus phage LP9206c, complete genome
MF775676.1	Lactococcus phage LP9207, complete genome
MF775682.1	Lactococcus phage LP9609, complete genome
MF775683.1	Lactococcus phage LP9701, complete genome
MF775684.1	Lactococcus phage LP9801, complete genome
MF775685.1	Lactococcus phage LP9903, complete genome
KX373687.1	Lactococcus phage M5938, complete genome
KX373688.1	Lactococcus phage M6162, complete genome
KX373689.1	Lactococcus phage M6165, complete genome
KX373691.1	Lactococcus phage M6653, complete genome
KX373692.1	Lactococcus phage M6654, complete genome
DQ054536.1	Lactococcus phage P008, complete genome. [25-AUG-2017]
KJ489010.1	Lactococcus phage P078, complete genome. [25-AUG-2017]
FJ429185.1	Lactococcus phage P087, complete genome. [26-MAY-2017]
KJ489011.1	Lactococcus phage P092, complete genome. [25-AUG-2017]
KJ489012.1	Lactococcus phage P118, complete genome. [25-AUG-2017]
KJ489013.1	Lactococcus phage P162, complete genome. [25-AUG-2017]
KC182551.1	Lactococcus phage P680, complete genome. [25-AUG-2017]
KM091444.1	Lactococcus phage phi145, complete genome. [25-AUG-2017]
KM091442.1	Lactococcus phage phi15, complete genome. [25-AUG-2017]
KC182552.1	Lactococcus phage phi7, complete genome. [25-AUG-2017]
KM091443.1	Lactococcus phage phi93, complete genome. [25-AUG-2017]
KF926093.1	Lactococcus phage phiL47, complete genome. [25-AUG-2017]
DQ394810.1	Lactococcus phage phismq86, complete genome. [25-AUG-2017]
KU892558.1	Lactococcus phage PLgT-1, complete genome
DQ490056.1	Lactococcus phage Q54, complete genome. [25-AUG-2017]
KY554760.1	Lactococcus phage R3.4, complete genome
KY554761.1	Lactococcus phage R31, complete genome
KF676640.1	Lactococcus phage SK1833, complete genome. [25-AUG-2017]
FJ848881.1	Lactococcus phage SL4, complete genome. [25-AUG-2017]
AF349457.1	Lactococcus phage ul36, complete genome
DQ394807.1	Lactococcus phage ul36.k1t1, complete genome. [25-AUG-2017]
DQ394809.1	Lactococcus phage ul36.t1k1, complete genome. [25-AUG-2017]
KM677185.1	Lactococcus phage WRP3, complete genome. [25-AUG-2017]
MF285616.1	Leclercia phage 10164-302, complete genome
MF285617.1	Leclercia phage 10164RH, complete genome
V01127.1	Left end of bacteriophage T7 genome. Includes the reading frames of the genes 0.3, 0.4, 0.5, 0.6, 0.65, 0.7, 1, 1.1, 1.2, 1.3 (early proteins) and 1.4, 1.5, 1.6, 1.7, 2, 2.5, 2.8, 3,
KM370384.1	Lelliottia phage phD2B, complete genome. [26-MAY-2017]
KF114879.1	Leptospira phage LbrZ_5399, complete genome. [26-MAY-2017]
KF114880.1	Leptospira phage LinZ_10, complete genome. [26-MAY-2017]
GQ451696.1	Leuconostoc phage 1-A4, complete genome. [25-AUG-2017]
JQ659259.1	Leuconostoc phage Lmd1, complete genome. [25-AUG-2017]
KM262191.1	Leuconostoc phage Ln-8, complete genome
KM262192.1	Leuconostoc phage Ln-9, complete genome
KC013021.1	Leuconostoc phage P793, complete genome. [25-AUG-2017]
KC013022.1	Leuconostoc phage phiLN03, complete genome
KC013023.1	Leuconostoc phage phiLN04, complete genome. [25-AUG-2017]
KC013025.1	Leuconostoc phage phiLN12, complete genome
KC013026.1	Leuconostoc phage phiLN25, complete genome
KC013027.1	Leuconostoc phage phiLN34, complete genome
KC013024.1	Leuconostoc phage phiLN6B, complete genome
KC013028.1	Leuconostoc phage phiLNTR2, complete genome
KC013029.1	Leuconostoc phage phiLNTR3, complete genome
JF773396.1	Liberibacter phage FP2, complete genome. [26-MAY-2017]
HQ377372.1	Liberibacter phage SC1, complete genome. [26-MAY-2017]
HQ377373.1	Liberibacter phage SC2, complete genome. [26-MAY-2017]
DQ003642.1	Listeria phage A006, complete genome. [25-AUG-2017]
DQ003637.1	Listeria phage A500, complete genome. [25-AUG-2017]
DQ003638.2	Listeria phage A511, complete genome. [25-AUG-2017]
DQ003639.1	Listeria phage B025, complete genome. [26-MAY-2017]
DQ003640.1	Listeria phage B054, complete genome. [25-AUG-2017]
KJ535722.1	Listeria phage LMSP-25, complete genome. [25-AUG-2017]
KJ591605.1	Listeria phage LMTA-57, complete genome. [25-AUG-2017]
KJ586795.1	Listeria phage LMTA-94, complete genome. [25-AUG-2017]
KJ094020.1	Listeria phage LP-026, complete genome. [25-AUG-2017]
JX120799.2	Listeria phage LP-030-2, complete genome
KJ094022.1	Listeria phage LP-030-3, complete genome. [25-AUG-2017]
KJ094025.1	Listeria phage LP-032 contig 2, partial genome
KJ094026.1	Listeria phage LP-032 contig 3, partial genome
JX126920.2	Listeria phage LP-037, complete genome. [25-AUG-2017]
KJ094033.1	Listeria phage LP-048, complete genome. [25-AUG-2017]
KJ094029.1	Listeria phage LP-064, complete genome. [25-AUG-2017]
KJ094030.1	Listeria phage LP-083-2, complete genome. [25-AUG-2017]
KJ094023.1	Listeria phage LP-101, complete genome. [26-MAY-2017]
JX126919.1	Listeria phage LP-110, complete genome. [25-AUG-2017]
KJ094021.1	Listeria phage LP-114, complete genome. [25-AUG-2017]
KJ094031.2	Listeria phage LP-124, complete genome. [25-AUG-2017]
JX126918.2	Listeria phage LP-125, complete genome. [25-AUG-2017]
DQ003641.1	Listeria phage P35, complete genome. [25-AUG-2017]
EU855793.1	Listeria phage P40, complete genome. [25-AUG-2017]
JX442241.1	Listeria phage P70, complete genome. [25-AUG-2017]
JQ797329.1	Listeria phage vB_LmoM_AG20, complete genome. [25-AUG-2017]
KP399678.1	Listeria phage vB_LmoS_293, complete genome. [25-AUG-2017]
AY772740.1	Listonella pelagia phage phiHSIC, complete genome. [25-AUG-2017]
HQ632859.1	Loktanella phage pCB2051-A genomic sequence
JN255163.1	Mannheimia phage vB_MhM_1152AP, complete genome. [25-AUG-2017]
KP137438.1	Mannheimia phage vB_MhM_2256AP1, complete genome
KP137440.1	Mannheimia phage vB_MhM_3927AP2, complete genome
KP137432.1	Mannheimia phage vB_MhM_535AP1, complete genome
KP137434.1	Mannheimia phage vB_MhM_587AP1, complete genome
KP137437.1	Mannheimia phage vB_MhS_1152AP2, complete genome
KP137439.1	Mannheimia phage vB_MhS_3927AP1, complete genome
KP137433.1	Mannheimia phage vB_MhS_535AP2, complete genome
KP137435.1	Mannheimia phage vB_MhS_587AP2, complete genome
KC131021.1	Marine gokushovirus isolate GOM, complete genome
KY626176.1	Marinomonas phage CPP1m, complete genome
JQ867100.1	Marinomonas phage P12026, complete genome. [25-AUG-2017]
KM199771.1	Mesorhizobium phagevB_MloP_Lo5R7ANS, complete genome
MF443783.1	Metallosphaera turreted icosahedral virus strain MTIV1, complete genome
AF065411.1	Methanobacterium phage psiM2, complete genome. [25-AUG-2017]
AF301375.1	Methanothermobacter wolfeii prophage psiM100, complete genome; flanked by Methanothermobacter wolfeii MTW1216 (mtw1216) and MTW1215 (mtw1215) genes, complete cds
EF579802.1	Microbacterium phage Min1, complete genome. [26-MAY-2017]
AB231700.1	Microcystis phage Ma-LMM01 DNA, complete genome. [25-AUG-2017]
KF356199.1	Microcystis phage MaMV-DC, complete genome. [25-AUG-2017]
KM589499.1	Microviridae Bog1249_12, complete genome
KM589500.1	Microviridae Bog5275_51, complete genome
KM589503.1	Microviridae Bog9017_22, complete genome
KM589504.1	Microviridae Fen2266_11, complete genome
KM589505.1	Microviridae Fen418_41, complete genome
KM589506.1	Microviridae Fen4707_41, complete genome
KM589509.1	Microviridae Fen685_11, complete genome
KM589510.1	Microviridae Fen7786_21, complete genome
KM589512.1	Microviridae Fen7895_21, complete genome
KM589513.1	Microviridae Fen7918_21, complete genome
KM589514.1	Microviridae Fen7940_21, complete genome
KR093634.1	Moraxella phage Mcat10, complete genome
KR093635.1	Moraxella phage Mcat11, complete genome
KR093637.1	Moraxella phage Mcat13, complete genome
KR093639.1	Moraxella phage Mcat15, complete genome
KR093640.1	Moraxella phage Mcat16, complete genome
KR093645.1	Moraxella phage Mcat21, complete genome
KR093646.1	Moraxella phage Mcat22, complete genome
KR093649.1	Moraxella phage Mcat25, complete genome
KR093652.1	Moraxella phage Mcat28, complete genome
KR093654.1	Moraxella phage Mcat30, complete genome
KR093629.1	Moraxella phage Mcat5, complete genome
KR093630.1	Moraxella phage Mcat6, complete genome
EU652770.3	Morganella phage MmP1, complete genome. [25-AUG-2017]
KX078569.1	Morganella phage vB_MmoM_MP1, complete genome
KX078568.1	Morganella phage vB_MmoP_MP2, complete genome
DQ398041.1	Mycobacteriophage 244, complete genome. [25-AUG-2017]
AY129339.1	Mycobacteriophage Barnyard, complete genome. [26-MAY-2017]
AY500153.1	Mycobacteriophage Bethlehem, complete genome. [25-AUG-2017]
AF271693.1	Mycobacteriophage Bxb1, complete sequence. [25-AUG-2017]
AY129337.1	Mycobacteriophage Bxz1, complete genome. [25-AUG-2017]
DQ398053.1	Mycobacteriophage Catera, complete genome. [25-AUG-2017]
DQ398043.1	Mycobacteriophage Che12, complete genome. [25-AUG-2017]
AY129336.2	Mycobacteriophage Che9d, complete genome. [26-JUL-2017]
AY129331.1	Mycobacteriophage CJW1, complete genome. [25-AUG-2017]
DQ398044.1	Mycobacteriophage Cooper, complete genome. [26-MAY-2017]
AY129335.1	Mycobacteriophage Corndog, complete genome. [25-AUG-2017]
AF022214.1	Mycobacteriophage D29, complete genome. [25-AUG-2017]
KF017005.1	Mycobacteriophage Daenerys, complete genome. [26-MAY-2017]
KM279937.1	Mycobacteriophage Estave1, complete genome. [26-MAY-2017]
DQ398045.1	Mycobacteriophage Llij, complete genome. [26-MAY-2017]
AY129338.1	Mycobacteriophage Omega, complete sequence. [25-AUG-2017]
KM363596.1	Mycobacteriophage Omnicron, complete genome. [26-MAY-2017]
DQ398046.1	Mycobacteriophage Orion, complete genome. [26-MAY-2017]
DQ398047.1	Mycobacteriophage PBI1, complete genome. [26-MAY-2017]
DQ398049.1	Mycobacteriophage Pipefish, complete genome. [26-MAY-2017]
DQ398051.1	Mycobacteriophage PLot, complete genome. [26-MAY-2017]
DQ398050.1	Mycobacteriophage PMC, complete genome. [26-MAY-2017]
DQ398048.1	Mycobacteriophage Qyrzula, complete genome. [26-MAY-2017]
AY129334.1	Mycobacteriophage Rosebush, complete genome. [25-AUG-2017]
JX121091.1	Mycobacteriophage Taj, complete genome. [26-MAY-2017]
AF068845.1	Mycobacteriophage TM4, complete genome. [26-MAY-2017]
AY500152.1	Mycobacteriophage U2, complete genome. [25-AUG-2017]
KF017004.1	Mycobacteriophage Velveteen, complete genome. [26-MAY-2017]
KF416340.1	Mycobacteriophage Wheeler, complete genome. [25-AUG-2017]
DQ398052.2	Mycobacteriophage Wildcat, complete genome. [26-MAY-2017]
KJ410132.1	Mycobacterium phage 20ES, complete genome
KJ028219.1	Mycobacterium phage 32HC, complete genome
KJ433973.1	Mycobacterium phage 39HC, complete genome
KJ192196.1	Mycobacterium phage 40AC, complete genome
KM597531.1	Mycobacterium phage Abrogate, complete genome. [25-AUG-2017]
JF704091.1	Mycobacterium phage ABU, complete sequence
JN699007.1	Mycobacterium phage Acadian, complete genome. [26-MAY-2017]
MG812486.1	Mycobacterium phage Acme, complete genome
KF279411.1	Mycobacterium phage Adawi, complete genome. [26-MAY-2017]
KC960489.1	Mycobacterium phage Adler, complete genome. [25-AUG-2017]
KF416344.1	Mycobacterium phage Adzzy, complete genome. [25-AUG-2017]
JQ809703.1	Mycobacterium phage Aeneas, complete genome. [25-AUG-2017]
JN699006.1	Mycobacterium phage Akoma, complete genome. [26-MAY-2017]
JX649100.1	Mycobacterium phage Alex, complete genome. [26-MAY-2017]
JF704092.1	Mycobacterium phage Alice, complete sequence
JN699005.1	Mycobacterium phage Alma, complete genome. [25-AUG-2017]
KJ174156.1	Mycobacterium phage Alsfro, complete genome. [25-AUG-2017]
KP027205.1	Mycobacterium phage Alvin, complete genome. [25-AUG-2017]
KX808132.1	Mycobacterium phage Amelie, complete genome
FJ973624.1	Mycobacterium phage Angel, complete genome. [25-AUG-2017]
HM152764.1	Mycobacterium phage Angelica, complete genome. [26-MAY-2017]
KF024721.1	Mycobacterium phage AnnaL29, complete genome. [25-AUG-2017]
KT365399.1	Mycobacterium phage Annihilator, complete genome
KF279418.2	Mycobacterium phage Anubis, complete genome
KF279418.1	Mycobacterium phage Anubis, complete genome. [25-AUG-2017]
KR781349.1	Mycobacterium phage Apizium, complete genome
KU761559.1	Mycobacterium phage ArcherNM, complete genome
KC748970.1	Mycobacterium phage ArcherS7, complete genome
KT591489.1	Mycobacterium phage Archie, complete genome
GU060500.1	Mycobacterium phage Ardmore, complete genome. [26-MAY-2017]
KM400683.2	Mycobacterium phage Ariel, complete genome
KM400683.1	Mycobacterium phage Ariel, complete genome. [25-AUG-2017]
MF668268.1	Mycobacterium phage Aroostook, complete genome
KF560333.1	Mycobacterium phage Artemis2UCLA, complete genome. [25-AUG-2017]
KC691257.1	Mycobacterium phage Astraea, complete genome
JQ911768.1	Mycobacterium phage Ava3, complete genome. [25-AUG-2017]
JQ809702.1	Mycobacterium phage Avani, complete genome. [26-MAY-2017]
JN699002.1	Mycobacterium phage Avrafan, complete genome. [25-AUG-2017]
JN699001.1	Mycobacterium phage Babsiella, complete genome. [25-AUG-2017]
KU568494.1	Mycobacterium phage Bactobuster, complete genome
KJ194580.1	Mycobacterium phage Badfish, complete genome. [26-MAY-2017]
KR080199.1	Mycobacterium phage Baee, complete genome
KF279412.2	Mycobacterium phage Bane1, complete genome. [26-MAY-2017]
KF279413.1	Mycobacterium phage Bane2, complete genome. [26-MAY-2017]
JN643714.1	Mycobacterium phage BarrelRoll, complete genome. [26-MAY-2017]
JF937091.2	Mycobacterium phage Bask21, complete genome
JF937091.1	Mycobacterium phage Bask21, complete genome. [25-AUG-2017]
MF919494.1	Mycobacterium phage BeanWater, complete genome
KF841475.1	Mycobacterium phage BellusTerra, complete genome. [25-AUG-2017]
KJ510413.1	Mycobacterium phage Bernal13, complete genome. [25-AUG-2017]
KF493879.1	Mycobacterium phage Bernardo, complete genome. [26-MAY-2017]
KX702320.1	Mycobacterium phage Bigfoot, complete genome
JN412591.1	Mycobacterium phage BigNuz, complete genome. [26-MAY-2017]
JN699000.1	Mycobacterium phage BillKnuckles, complete genome. [25-AUG-2017]
KM597530.1	Mycobacterium phage Bipolar, complete genome. [26-MAY-2017]
KU728633.1	Mycobacterium phage Bipper, complete genome
KX522649.1	Mycobacterium phage Bircsak, complete genome
JN698999.1	Mycobacterium phage Blue7, complete genome. [25-AUG-2017]
KC787107.1	Mycobacterium phage Bo4, complete genome. [25-AUG-2017]
KF114874.1	Mycobacterium phage Bobi, complete genome. [26-MAY-2017]
JN699628.1	Mycobacterium phage Bongo, complete genome. [26-MAY-2017]
EU816590.1	Mycobacterium phage Boomer, complete genome. [26-MAY-2017]
EU568876.1	Mycobacterium phage BPs, complete genome. [25-AUG-2017]
KF006817.1	Mycobacterium phage Breeniome, complete genome. [25-AUG-2017]
KC691254.1	Mycobacterium phage Breezona, complete genome
KU865302.1	Mycobacterium phage Brocalys, complete genome
KT270441.1	Mycobacterium phage BrownCNA, complete genome
KX443326.1	Mycobacterium phage BruceB, complete genome
KF562099.1	Mycobacterium phage Bruin, complete genome. [25-AUG-2017]
FJ168659.1	Mycobacterium phage Brujita, complete genome. [25-AUG-2017]
JN698998.1	Mycobacterium phage Bruns, complete genome. [25-AUG-2017]
KT347313.1	Mycobacterium phage Brusacoram, complete genome
KC172839.1	Mycobacterium phage BTCU-1, complete genome. [25-AUG-2017]
KX523125.1	Mycobacterium phage BuzzBuzz, complete genome
KM347889.1	Mycobacterium phage BuzzLyseyear, complete genome. [26-MAY-2017]
KT895281.1	Mycobacterium phage Cabrinians, complete genome
KX683876.1	Mycobacterium phage CactusRose, complete genome
EU826471.1	Mycobacterium phage Cali, complete genome. [25-AUG-2017]
KR080198.1	Mycobacterium phage Cambiare, complete genome
KM652553.1	Mycobacterium phage CaptainTrips, complete genome. [26-MAY-2017]
KM588359.1	Mycobacterium phage Carcharodon, complete genome. [25-AUG-2017]
KC701493.1	Mycobacterium phage CASbig, complete genome. [25-AUG-2017]
KU613353.1	Mycobacterium phage Catalina, complete genome
KF017002.1	Mycobacterium phage Catdawg, complete genome. [25-AUG-2017]
KT355472.1	Mycobacterium phage Cedasite, complete genome
KT246486.1	Mycobacterium phage Chadwick, complete genome
FJ174694.1	Mycobacterium phage Chah, complete genome. [26-MAY-2017]
MF919497.1	Mycobacterium phage Chance64, complete genome
MF140402.1	Mycobacterium phage Chancellor, complete genome
KP027207.1	Mycobacterium phage Chandler, complete genome. [26-MAY-2017]
JN256079.1	Mycobacterium phage Charlie, complete genome. [25-AUG-2017]
AY129333.1	Mycobacterium phage Che9c, complete sequence. [25-AUG-2017]
KJ944841.1	Mycobacterium phage Cheetobro, complete genome. [26-MAY-2017]
KC787105.1	Mycobacterium phage Chy4, complete genome. [25-AUG-2017]
KC787106.1	Mycobacterium phage Chy5, complete genome. [25-AUG-2017]
MF140405.1	Mycobacterium phage Clautastrophe, complete genome
KF560332.1	Mycobacterium phage CloudWang3, complete genome. [25-AUG-2017]
GQ303259.1	Mycobacterium phage Colbert, complete genome. [26-MAY-2017]
KF560330.1	Mycobacterium phage Conspiracy, complete genome. [25-AUG-2017]
KF024732.1	Mycobacterium phage Contagion, complete genome. [25-AUG-2017]
JN698997.1	Mycobacterium phage Courthouse, complete genome. [25-AUG-2017]
KJ410134.1	Mycobacterium phage CRB1, complete genome
HM152767.1	Mycobacterium phage CrimD, complete genome. [26-MAY-2017]
KF024731.1	Mycobacterium phage Crossroads, complete genome. [26-MAY-2017]
AP018462.1	Mycobacterium phage D12 DNA, complete genome
MF919499.1	Mycobacterium phage Daffodil, complete genome
KX683293.1	Mycobacterium phage Daffy, complete genome
KJ567046.1	Mycobacterium phage Damien, complete genome
JN412588.1	Mycobacterium phage Dandelion, complete genome. [25-AUG-2017]
KT309034.1	Mycobacterium phage Dante, complete genome
EU744252.1	Mycobacterium phage DD5, complete genome. [25-AUG-2017]
JN698996.1	Mycobacterium phage DeadP, complete genome. [26-MAY-2017]
KX576645.1	Mycobacterium phage Derpp, complete genome
KC787108.1	Mycobacterium phage DNAIII, complete genome. [25-AUG-2017]
KF841477.1	Mycobacterium phage Donovan, complete genome. [26-MAY-2017]
JN153085.1	Mycobacterium phage Doom, complete genome. [25-AUG-2017]
JN698995.1	Mycobacterium phage Dori, complete genome. [26-MAY-2017]
JN542517.1	Mycobacterium phage Drago, complete genome. [26-MAY-2017]
JF704116.1	Mycobacterium phage Drazdys, complete genome
KF306380.1	Mycobacterium phage DrDrey, complete genome. [25-AUG-2017]
JN660814.1	Mycobacterium phage Dreamboat, complete genome. [25-AUG-2017]
JN698994.1	Mycobacterium phage DS6A, complete genome. [25-AUG-2017]
KT365398.1	Mycobacterium phage DTDevon, complete genome
KC691255.2	Mycobacterium phage Dumbo, complete genome
KT222942.1	Mycobacterium phage Dusk, complete genome
KF024730.1	Mycobacterium phage Dylan, complete genome. [25-AUG-2017]
KF861510.1	Mycobacterium phage EagleEye, complete genome. [25-AUG-2017]
KF981601.1	Mycobacterium phage Echild, complete genome. [25-AUG-2017]
KP027196.1	Mycobacterium phage Edtherson, complete genome. [25-AUG-2017]
KY012363.1	Mycobacterium phage Empress, complete genome
KT281789.1	Mycobacterium phage Enkosi, complete genome
KJ959632.1	Mycobacterium phage Equemioh13, complete genome. [25-AUG-2017]
KX721256.1	Mycobacterium phage Erdmann, complete genome
KM236502.1	Mycobacterium phage Eremos, complete genome. [26-MAY-2017]
GQ303260.1	Mycobacterium phage ET08, complete genome. [25-AUG-2017]
JN153086.1	Mycobacterium phage Euphoria, complete genome. [25-AUG-2017]
JN412590.1	Mycobacterium phage Eureka, complete genome. [25-AUG-2017]
KU985093.1	Mycobacterium phage EvilGenius, complete genome
JF744988.1	Mycobacterium phage Faith1, complete genome. [26-MAY-2017]
GU247133.1	Mycobacterium phage Fang, complete genome. [26-MAY-2017]
JN600672.1	Mycobacterium phage Fezzik, complete genome. [26-MAY-2017]
JN698993.1	Mycobacterium phage Firecracker, complete genome. [25-AUG-2017]
JX899358.1	Mycobacterium phage First, complete genome. [25-AUG-2017]
KC691256.1	Mycobacterium phage Fishburne, complete genome
KR080197.1	Mycobacterium phage FlagStaff, complete genome
KR997930.1	Mycobacterium phage Florinda, complete genome
KP027197.1	Mycobacterium phage FluffyNinja, complete genome. [26-MAY-2017]
KF279414.1	Mycobacterium phage Fredward, complete genome. [25-AUG-2017]
KT355474.1	Mycobacterium phage Frosty24, complete genome
FJ174690.1	Mycobacterium phage Fruitloop, complete genome. [25-AUG-2017]
KX781992.1	Mycobacterium phage Gabriel, complete genome
JN698992.1	Mycobacterium phage Gadjet, complete genome. [26-MAY-2017]
KJ567043.1	Mycobacterium phage Gaia, complete genome. [25-AUG-2017]
KX507361.1	Mycobacterium phage Gardann, complete genome
KY783914.1	Mycobacterium phage GardenSalsa, complete genome
KX636165.1	Mycobacterium phage Gengar, complete genome
MF668271.1	Mycobacterium phage Geralt, complete genome
JF704096.1	Mycobacterium phage Ghost, complete sequence
MF668272.1	Mycobacterium phage Gideon, complete genome
EU203571.2	Mycobacterium phage Giles, complete genome. [26-MAY-2017]
KC748968.1	Mycobacterium phage Gizmo, complete genome
KM923970.1	Mycobacterium phage Gomashi, complete genome. [25-AUG-2017]
KX522943.1	Mycobacterium phage Gompeii16, complete genome
KF560331.1	Mycobacterium phage Graduation, complete genome. [25-AUG-2017]
FJ168661.1	Mycobacterium phage Gumball, complete genome. [26-MAY-2017]
JN398368.1	Mycobacterium phage GUmbie, complete genome. [26-MAY-2017]
KJ725374.1	Mycobacterium phage Guo1, complete genome. [25-AUG-2017]
KM101122.1	Mycobacterium phage Hades, complete genome
DQ398042.2	Mycobacterium phage Halo, complete genome. [25-AUG-2017]
KF024723.1	Mycobacterium phage Hamulus, complete genome. [26-MAY-2017]
KF493880.1	Mycobacterium phage HanShotFirst, complete genome. [25-AUG-2017]
KJ194582.1	Mycobacterium phage Hawkeye, complete genome. [26-MAY-2017]
JF937097.1	Mycobacterium phage Hertubise, complete genome. [26-MAY-2017]
KC661275.1	Mycobacterium phage HINdeR, complete genome. [25-AUG-2017]
GQ303261.1	Mycobacterium phage Hope, complete genome. [25-AUG-2017]
KX585252.1	Mycobacterium phage HortumSL17, complete genome
KJ433974.1	Mycobacterium phage Hosp, complete genome. [26-MAY-2017]
KF562100.1	Mycobacterium phage HufflyPuff, complete genome. [25-AUG-2017]
KT281790.1	Mycobacterium phage HyRo, complete genome
KY385382.1	Mycobacterium phage ImtiyazSitla, complete genome
KM066034.1	Mycobacterium phage Inventum, complete genome
KU055616.1	Mycobacterium phage Iracema64, complete genome
KX592589.1	Mycobacterium phage Iridoclysis, complete genome
JN698990.1	Mycobacterium phage IsaacEli, complete genome. [26-MAY-2017]
KF017003.1	Mycobacterium phage Jabbawokkie, complete genome. [26-MAY-2017]
JN698989.1	Mycobacterium phage JacAttac, complete genome. [26-MAY-2017]
KF493881.1	Mycobacterium phage JAMaL, complete genome. [26-MAY-2017]
KX588251.1	Mycobacterium phage Jane, complete genome
EU744251.1	Mycobacterium phage Jasper, complete genome. [25-AUG-2017]
JN699019.1	Mycobacterium phage Jeffabunny, complete genome. [25-AUG-2017]
KU255188.1	Mycobacterium phage JenCasNa, complete genome
KC661280.1	Mycobacterium phage Job42, complete genome. [26-MAY-2017]
KC661281.1	Mycobacterium phage Jobu08, complete genome. [25-AUG-2017]
KJ433976.1	Mycobacterium phage Jolie1, complete genome
KJ410133.1	Mycobacterium phage Jolie2, complete genome
KF493882.1	Mycobacterium phage Jovo, complete genome. [25-AUG-2017]
MF185729.1	Mycobacterium phage KADY, complete genome
MF919511.1	Mycobacterium phage Kailash, complete genome
KJ510414.1	Mycobacterium phage Kampy, complete genome. [25-AUG-2017]
KF024729.1	Mycobacterium phage KayaCho, complete genome. [26-MAY-2017]
EU744248.1	Mycobacterium phage KBG, complete genome. [25-AUG-2017]
KP027199.1	Mycobacterium phage Keshu, complete genome. [26-MAY-2017]
JN699017.1	Mycobacterium phage Kikipoo, complete genome. [26-MAY-2017]
KR935214.1	Mycobacterium phage Kimberlium, complete genome
MF919512.1	Mycobacterium phage Klein, complete genome
MF919513.1	Mycobacterium phage Koguma, complete genome
FJ174691.1	Mycobacterium phage Konstantine, complete genome. [26-MAY-2017]
EU816591.1	Mycobacterium phage Kostya, complete genome. [25-AUG-2017]
KM923971.1	Mycobacterium phage Kratio, complete genome. [26-MAY-2017]
JN699016.1	Mycobacterium phage Kugel, complete genome. [25-AUG-2017]
NC_001335.1	Mycobacterium phage L5 complete genome
KT588442.1	Mycobacterium phage LadyBird, complete genome
KJ409696.1	Mycobacterium phage Lamina13, complete genome. [25-AUG-2017]
KM677210.1	Mycobacterium phage Larenn, complete genome. [25-AUG-2017]
JN243855.1	Mycobacterium phage Larva, complete genome. [26-MAY-2017]
KM408320.1	Mycobacterium phage Lasso, complete genome. [26-MAY-2017]
KC787110.1	Mycobacterium phage Leo, complete genome. [25-AUG-2017]
JN412593.1	Mycobacterium phage Liefie, complete genome. [25-AUG-2017]
JN382248.1	Mycobacterium phage Lilac, complete genome. [25-AUG-2017]
MF919518.1	Mycobacterium phage LilPharaoh, complete genome
JN412592.1	Mycobacterium phage LinStu, complete genome. [25-AUG-2017]
KF017001.1	Mycobacterium phage LittleCherry, complete genome. [25-AUG-2017]
KX369583.1	Mycobacterium phage Littleton, complete genome
KM402757.1	Mycobacterium phage Llama, complete genome. [26-MAY-2017]
EU744249.1	Mycobacterium phage Lockley, complete genome. [25-AUG-2017]
KT281791.1	Mycobacterium phage Lolly9, complete genome
KU761558.1	Mycobacterium phage Loser, complete genome
KX670788.1	Mycobacterium phage Louie6, complete genome
MG099946.1	Mycobacterium phage LouisV14, complete genome
GQ303262.1	Mycobacterium phage LRRHood, complete genome. [25-AUG-2017]
KR080193.1	Mycobacterium phage Luchador, complete genome
KT372003.1	Mycobacterium phage Lumos, complete genome
KX369584.1	Mycobacterium phage Makemake, complete genome
KP027200.1	Mycobacterium phage Malithi, complete genome. [26-MAY-2017]
KJ595576.1	Mycobacterium phage Manad, complete genome
KM233454.1	Mycobacterium phage MarQuardt, complete genome. [25-AUG-2017]
KM925136.1	Mycobacterium phage MiaZeal, complete genome. [25-AUG-2017]
KF986246.1	Mycobacterium phage MichelleMyBell, complete genome. [25-AUG-2017]
MF185730.1	Mycobacterium phage Miley16, complete genome
KP027206.1	Mycobacterium phage Milly, complete genome. [26-MAY-2017]
KR080204.1	Mycobacterium phage Mindy, complete genome
KM101123.1	Mycobacterium phage Minerva, complete genome
KX670813.1	Mycobacterium phage MitKao, complete genome
KR080196.1	Mycobacterium phage Momo, complete genome
JN699626.1	Mycobacterium phage MoMoMixon, complete genome. [25-AUG-2017]
KJ538721.1	Mycobacterium phage MosMoris, complete genome. [26-MAY-2017]
KY223999.1	Mycobacterium phage MrMagoo, complete genome
KF024728.1	Mycobacterium phage Muddy, complete genome. [26-MAY-2017]
KU695581.1	Mycobacterium phage Mulciber, complete genome
KC748971.1	Mycobacterium phage Murphy, complete genome
KM677211.1	Mycobacterium phage Murucutumbu, complete genome. [26-MAY-2017]
EU826466.1	Mycobacterium phage Myrna, complete genome. [25-AUG-2017]
KU716095.1	Mycobacterium phage Myxus, complete genome
KF562101.1	Mycobacterium phage Nala, complete genome. [25-AUG-2017]
JN699627.1	Mycobacterium phage Nappy, complete genome. [25-AUG-2017]
KT222941.1	Mycobacterium phage NelitzaMV, complete genome
KR080201.1	Mycobacterium phage Nerujay, complete genome
KC691258.1	Mycobacterium phage Newman, complete genome
KR997934.1	Mycobacterium phage Nhonho, complete genome
EU770221.1	Mycobacterium phage Nigel, complete genome. [26-MAY-2017]
KJ194583.1	Mycobacterium phage Numberten, complete genome. [26-MAY-2017]
KF954506.1	Mycobacterium phage Nyxis, complete genome. [25-AUG-2017]
KF986247.1	Mycobacterium phage Oaker, complete genome. [26-MAY-2017]
KF959563.1	Mycobacterium phage Obama12, complete genome. [25-AUG-2017]
KJ567042.1	Mycobacterium phage OkiRoe, complete genome
MG770213.1	Mycobacterium phage OldBen, complete genome
JN192463.1	Mycobacterium phage Oline, complete genome. [26-MAY-2017]
JF704109.1	Mycobacterium phage Oosterbaan, complete sequence
JF957059.1	Mycobacterium phage Optimus, complete genome. [25-AUG-2017]
JN006064.1	Mycobacterium phage OSmaximus, complete genome. [26-MAY-2017]
KR824843.1	Mycobacterium phage Ovechkin, complete genome
FJ174692.1	Mycobacterium phage Pacc40, complete genome. [26-MAY-2017]
KU935727.1	Mycobacterium phage Panchino, complete genome
KX369586.1	Mycobacterium phage Papez, complete genome
KT438500.1	Mycobacterium phage Pari, complete genome
JN412589.1	Mycobacterium phage Patience, complete genome. [26-MAY-2017]
KC661273.1	Mycobacterium phage PattyP, complete genome. [25-AUG-2017]
KR029086.1	Mycobacterium phage PDRPv, complete genome
GQ303263.1	Mycobacterium phage Peaches, complete genome. [25-AUG-2017]
KC900379.1	Mycobacterium phage PegLeg, complete genome
KT818595.1	Mycobacterium phage Pepe, complete genome
JN572689.1	Mycobacterium phage Perseus, complete genome. [25-AUG-2017]
AF547430.1	Mycobacterium phage PG1, complete genome
EU816589.1	Mycobacterium phage Phaedrus, complete genome. [26-MAY-2017]
KJ510415.1	Mycobacterium phage Phantastic, complete genome. [25-AUG-2017]
KF562102.1	Mycobacterium phage PhatBacter, complete genome. [25-AUG-2017]
KT279576.1	Mycobacterium phage Phatniss, complete genome
KC748969.1	Mycobacterium phage Phaux, complete genome
KR080195.1	Mycobacterium phage Phayonce, complete genome
MF324909.1	Mycobacterium phage PhelpsODU, complete genome
MG757164.1	Mycobacterium phage PhenghisKhan, complete genome
MG757165.1	Mycobacterium phage Phergie, complete genome
JF704102.1	Mycobacterium phage Phipps, complete sequence
KT206225.1	Mycobacterium phage Phlei, complete genome
FJ641182.1	Mycobacterium phage Phlyer, complete genome. [26-MAY-2017]
KP017310.1	Mycobacterium phage Phoxy, complete genome. [25-AUG-2017]
KU935731.1	Mycobacterium phage Phrann, complete genome
KT347314.2	Mycobacterium phage Phreak, complete genome
KF279415.1	Mycobacterium phage PhrostyMug, complete genome. [25-AUG-2017]
KC661277.1	Mycobacterium phage Phrux, complete genome. [25-AUG-2017]
MF919528.1	Mycobacterium phage Phunky, complete genome
JX649097.2	Mycobacterium phage Piglet, complete genome
JX649097.1	Mycobacterium phage Piglet, complete genome. [26-MAY-2017]
KJ690250.1	Mycobacterium phage Pinto, complete genome
KT285706.1	Mycobacterium phage Pioneer, complete genome
MG812495.1	Mycobacterium phage Pippin, complete genome
KY965064.1	Mycobacterium phage Pippy, complete genome
KP027208.1	Mycobacterium phage Pipsqueak, complete genome. [26-MAY-2017]
KM197169.1	Mycobacterium phage Piro94, complete genome
JN624850.1	Mycobacterium phage Pleione, complete genome. [25-AUG-2017]
KR997967.1	Mycobacterium phage Pops, complete genome
KT281792.1	Mycobacterium phage PopTart, complete genome
EU816588.1	Mycobacterium phage Porky, complete genome. [25-AUG-2017]
KU867907.1	Mycobacterium phage Potter, complete genome
EU770222.1	Mycobacterium phage Predator, complete genome. [26-MAY-2017]
EU744250.1	Mycobacterium phage Pukovnik, complete genome. [25-AUG-2017]
KR997968.1	Mycobacterium phage Quico, complete genome
KF279417.1	Mycobacterium phage Quink, complete genome. [25-AUG-2017]
FJ174693.1	Mycobacterium phage Ramsey, complete genome. [26-MAY-2017]
JN624851.1	Mycobacterium phage Redi, complete genome. [25-AUG-2017]
KF114875.1	Mycobacterium phage Redno2, complete genome. [25-AUG-2017]
KJ156985.1	Mycobacterium phage RhynO, complete genome
JN398369.1	Mycobacterium phage RidgeCB, complete genome. [25-AUG-2017]
MF668281.1	Mycobacterium phage RitaG, complete genome
EU826467.1	Mycobacterium phage Rizal, complete genome. [25-AUG-2017]
KT259047.1	Mycobacterium phage Rufus, complete genome
JN680858.1	Mycobacterium phage Rumpelstiltskin, complete genome. [26-MAY-2017]
KJ025956.1	Mycobacterium phage Saal, complete genome. [25-AUG-2017]
KF024726.1	Mycobacterium phage Sarfire, complete genome. [25-AUG-2017]
KP027201.1	Mycobacterium phage Sbash, complete genome. [25-AUG-2017]
GU247134.1	Mycobacterium phage Scoot17C, complete genome. [26-MAY-2017]
EU826469.2	Mycobacterium phage ScottMcG, complete genome
EU826469.1	Mycobacterium phage ScottMcG, complete genome. [25-AUG-2017]
KJ194585.1	Mycobacterium phage Seabiscuit, complete genome. [25-AUG-2017]
KT281793.1	Mycobacterium phage Seagreen, complete genome
KT381276.1	Mycobacterium phage Serenity, complete genome
KC661279.1	Mycobacterium phage Severus, complete genome. [25-AUG-2017]
JN699012.1	Mycobacterium phage SG4, complete genome. [25-AUG-2017]
KR080206.1	Mycobacterium phage ShedlockHolmes, complete genome
KP273225.1	Mycobacterium phage Sheen, complete genome. [25-AUG-2017]
KU985090.1	Mycobacterium phage Shipwreck, complete genome
KC576784.1	Mycobacterium phage ShiVal, complete genome. [26-MAY-2017]
KF024734.1	Mycobacterium phage Shrimp, complete genome. [25-AUG-2017]
KP027209.1	Mycobacterium phage Sigman, complete genome. [26-MAY-2017]
KC661278.1	Mycobacterium phage SiSi, complete genome. [26-MAY-2017]
KU935729.1	Mycobacterium phage SkinnyPete, complete genome
GU247132.1	Mycobacterium phage SkiPole, complete genome. [25-AUG-2017]
MF668283.1	Mycobacterium phage Smairt, complete genome
KT184694.1	Mycobacterium phage Smeadley, complete genome
KX534004.1	Mycobacterium phage Sneeze, complete genome
KT281794.1	Mycobacterium phage Snenia, complete genome
EU826470.1	Mycobacterium phage Solon, complete genome. [25-AUG-2017]
KJ174157.1	Mycobacterium phage Soto, complete genome. [26-MAY-2017]
KM083128.1	Mycobacterium phage Sparky, complete genome. [25-AUG-2017]
JQ300538.1	Mycobacterium phage Spartacus, complete genome. [25-AUG-2017]
KP017311.1	Mycobacterium phage Spike509, complete genome. [25-AUG-2017]
EU826468.1	Mycobacterium phage Spud, complete genome. [25-AUG-2017]
KM101124.1	Mycobacterium phage Squirty, complete genome. [25-AUG-2017]
JN699011.1	Mycobacterium phage Stinger, complete genome. [26-MAY-2017]
KF713485.1	Mycobacterium phage Suffolk, complete genome. [26-MAY-2017]
KM591906.2	Mycobacterium phage SweetiePie, complete genome
KM591906.1	Mycobacterium phage SweetiePie, complete genome. [25-AUG-2017]
KM101118.1	Mycobacterium phage Swirley, complete genome
KJ194579.1	Mycobacterium phage Swish, complete genome. [26-MAY-2017]
JF946695.1	Mycobacterium phage SWU1, complete genome. [25-AUG-2017]
KT326768.1	Mycobacterium phage Tasp14, complete genome
KT438501.2	Mycobacterium phage Theia, complete genome
KT363731.1	Mycobacterium phage TheloniousMonk, complete genome
JN201525.1	Mycobacterium phage Thibault, complete genome. [25-AUG-2017]
KP027204.1	Mycobacterium phage Thor, complete genome. [25-AUG-2017]
JF957056.1	Mycobacterium phage Thora, complete genome. [26-MAY-2017]
JN699009.1	Mycobacterium phage ThreeOh3D2, complete genome. [26-MAY-2017]
KM101119.1	Mycobacterium phage Tiffany, complete genome
KX752698.1	Mycobacterium phage Tonenili, complete genome
JN006061.1	Mycobacterium phage Toto, complete genome. [25-AUG-2017]
KM101120.1	Mycobacterium phage Trike, complete genome
JN408461.1	Mycobacterium phage Trixie, complete genome. [25-AUG-2017]
FJ168662.1	Mycobacterium phage Troll4, complete genome. [26-MAY-2017]
KF024724.1	Mycobacterium phage Trouble, complete genome. [25-AUG-2017]
JN408460.1	Mycobacterium phage Turbido, complete genome. [25-AUG-2017]
KT388014.1	Mycobacterium phage Turj99, complete genome
EF536069.1	Mycobacterium phage Tweety, complete genome. [26-MAY-2017]
KX576646.1	Mycobacterium phage TyrionL, complete genome
GQ303266.1	Mycobacterium phage UncleHowie, complete genome. [26-MAY-2017]
MF324908.1	Mycobacterium phage Unicorn, complete genome
KT004677.1	Mycobacterium phage UnionJack, complete genome
JF704113.1	Mycobacterium phage UPIE, complete sequence
KF713486.1	Mycobacterium phage Validus, complete genome. [26-MAY-2017]
JX901189.1	Mycobacterium phage vB_MapS_FF47, complete genome. [25-AUG-2017]
KR080194.1	Mycobacterium phage Vincenzo, complete genome
JN687951.1	Mycobacterium phage Violet, complete genome. [25-AUG-2017]
MF919539.1	Mycobacterium phage Virapocalypse, complete genome
JN699008.1	Mycobacterium phage Vista, complete genome. [26-MAY-2017]
KM401838.1	Mycobacterium phage VohminGhazi, complete genome. [25-AUG-2017]
JF704103.1	Mycobacterium phage Vortex, complete sequence
JN699625.1	Mycobacterium phage Wally, complete genome. [25-AUG-2017]
KF006818.1	Mycobacterium phage Wanda, complete genome. [25-AUG-2017]
HQ728524.1	Mycobacterium phage Wee, complete genome. [26-MAY-2017]
KF024725.1	Mycobacterium phage Whirlwind, complete genome. [26-MAY-2017]
JN243857.1	Mycobacterium phage Wile, complete genome. [25-AUG-2017]
KJ595575.1	Mycobacterium phage Willis, complete genome. [25-AUG-2017]
KX576644.1	Mycobacterium phage WillSterrel, complete genome
KC661276.1	Mycobacterium phage Winky, complete genome. [26-MAY-2017]
KC736071.1	Mycobacterium phage WIVsmall, complete genome. [26-MAY-2017]
KU935728.1	Mycobacterium phage Xeno, complete genome
KT281795.1	Mycobacterium phage XFactor, complete genome
KF560334.1	Mycobacterium phage Zaka, complete genome. [25-AUG-2017]
KJ567041.1	Mycobacterium phage Zapner, complete genome
KT321476.1	Mycobacterium phage Zeenon, complete genome
KJ510412.1	Mycobacterium phage ZoeJ, complete genome. [26-MAY-2017]
KM881426.1	Mycobacterium phage ZygoTaiga
HM152763.1	Mycobacterium virus Bron, complete genome. [29-SEP-2017]
AY129332.2	Mycobacterium virus Bxz2, complete genome
AY129330.1	Mycobacterium virus Che8, complete genome
HM152767.2	Mycobacterium virus CrimD, complete genome
JN831653.1	Mycobacterium virus Fionnbarth, complete genome. [29-SEP-2017]
JF704098.1	Mycobacterium virus JHC117, complete genome
JF704110.1	Mycobacterium virus PackMan, complete genome
AF074945.1	Mycoplasma arthritidis bacteriophage MAV1, complete genome. [26-MAY-2017]
AY583234.1	Mycoplasma phage phiMFV1, complete genome
AY583236.1	Mycoplasma phage phiMFV1, complete genome. [26-MAY-2017]
AF246223.1	Mycoplasma virus P1, complete genome. [11-NOV-2016]
KF416343.1	Myobacteriophage Goku, complete genome. [25-AUG-2017]
KF416342.1	Myobacteriophage Papyrus, complete genome. [26-MAY-2017]
KF416341.1	Myobacteriophage Phelemich, complete genome. [26-MAY-2017]
AY048850.1	Natrinema virus SNJ1, complete genome
KJ534580.1	Nitrincola phage 1M3-16, complete genome. [25-AUG-2017]
JN116828.1	Nocardia phage NBR1, complete genome. [25-AUG-2017]
J02451.1	nterobacteria phage fd strain 478, complete genome. [25-AUG-2017]
J02459.1	nterobacteria phage lambda, complete genome. [25-AUG-2017]
KF147927.1	Oenococcus phage phi9805, complete genome. [26-MAY-2017]
KF183314.1	Oenococcus phage phiS11, complete genome. [26-MAY-2017]
KF183315.1	Oenococcus phage phiS13, complete genome. [26-MAY-2017]
KT361649.1	Paenibacillus phage Fern, complete genome
KP202972.1	Paenibacillus phage HB10c2, complete genome. [26-MAY-2017]
KT361653.1	Paenibacillus phage Paisley, complete genome
HQ332138.1	Paenibacillus phage PG1 genomic sequence
KF010834.1	Paenibacillus phage phiIBB_Pl23, complete genome. [26-MAY-2017]
KT755656.1	Paenibacillus phage Tripp, complete genome
KT361654.1	Paenibacillus phage Vegas, complete genome
KT361650.1	Paenibacillus phage Willow, complete genome
KT361652.1	Paenibacillus phage Xenia, complete genome
FR687252.1	Pantoea phage LIMElight complete genome [26-MAY-2017]
FR751545.1	Pantoea phage LIMEzero complete genome [26-MAY-2017]
KM589515.1	Parabacteroides phage YZ-2015a, complete genome
KM589516.1	Parabacteroides phage YZ-2015b, complete genome
KT254131.1	Pbunalikevirus phiMoody, complete genome
KF835987.1	Pectobacterium bacteriophage PM2, complete genome. [25-AUG-2017]
MF979560.1	Pectobacterium phage DU_PP_I, complete genome
MF979563.1	Pectobacterium phage DU_PP_IV, complete genome
JX195166.1	Pectobacterium phage My1, complete genome. [25-AUG-2017]
JQ015307.1	Pectobacterium phage phiTE, complete genome. [25-AUG-2017]
KF534715.1	Pectobacterium phage PM1, complete genome. [26-MAY-2017]
JQ837901.1	Pectobacterium phage PP1, complete genome. [26-MAY-2017]
KX278418.1	Pectobacterium phage PP16, complete genome
KX278419.1	Pectobacterium phage PP90, complete genome
JQ177065.1	Pectobacterium phage ZF40, complete genome. [26-MAY-2017]
JN051154.1	Pediococcus phage clP1, complete genome. [25-AUG-2017]
KC465899.1	Pelagibacter phage HTVC008M, complete genome. [25-AUG-2017]
KC465898.1	Pelagibacter phage HTVC010P, complete genome. [26-MAY-2017]
KC465900.1	Pelagibacter phage HTVC011P, complete genome. [26-MAY-2017]
KC465901.1	Pelagibacter phage HTVC019P, complete genome. [25-AUG-2017]
CP011970.1	Peptoclostridium phage phiCDIF1296T strain DSM 1296, complete sequence
JQ823123.1	Persicivirga phage P12024L, complete genome. [25-AUG-2017]
JQ823122.1	Persicivirga phage P12024S, complete genome. [25-AUG-2017]
KC662250.1	Phaeocystis globosa virus virophage, complete genome
AJ556162.1	Phage BP-4795 complete genome [25-AUG-2017]
AB285204.1	Phage cdtI DNA, complete genome. [26-MAY-2017]
KX501135.1	Phage DP-2017a isolate CA40A hypothetical protein, tape measure, hypothetical protein, LysM, D-like protein, hypothetical protein, type IV secretion protein, baseplate, hypothetical protein, hydrolase, hypothetical protein, helicase, primase, type III restriction endonuclease, and exonuclease genes,
DQ873690.1	Phage MP22, complete genome
AB823818.1	Phage phi OH2 DNA, complete genome. [25-AUG-2017]
AF306496.1	Phage phiMH2K, complete genome
AM040673.1	Phage phiSMA9 viral zot gene, rstA gene (partial), and ORF1-5 [25-AUG-2017]
KM044272.1	Phage vB_EcoP_SU10, complete genome. [25-AUG-2017]
EF537008.1	Phormidium phage Pf-WMP3, complete genome. [26-MAY-2017]
HQ683709.1	Planktothrix phage PaV-LD, complete genome. [26-MAY-2017]
KJ183192.1	Podovirus Lau218 strain KiloMoana, complete genome
KJ183193.1	Podovirus Lau218 strain TahiMoana, complete genome
KR136259.1	Polaribacter phage P12002L, complete genome
KR136260.1	Polaribacter phage P12002S, complete genome
HQ332140.1	Prochlorococcus phage P-GSP1 genomic sequence
GU071101.1	Prochlorococcus phage P-HM1, complete genome. [25-AUG-2017]
GU075905.1	Prochlorococcus phage P-HM2, complete genome. [25-AUG-2017]
GU071099.1	Prochlorococcus phage P-RSM4, complete genome. [25-AUG-2017]
AY939844.2	Prochlorococcus phage P-SSM2, complete genome. [25-AUG-2017]
GU071092.1	Prochlorococcus phage P-SSM2, complete genome. [25-AUG-2017]
HQ337021.1	Prochlorococcus phage P-SSM3 genomic sequence
AY940168.2	Prochlorococcus phage P-SSM4, complete genome. [25-AUG-2017]
HQ632825.1	Prochlorococcus phage P-SSM5 genomic sequence
GU071103.1	Prochlorococcus phage P-SSM7, complete genome. [25-AUG-2017]
HQ337022.1	Prochlorococcus phage P-SSP10 genomic sequence
HQ332137.1	Prochlorococcus phage P-SSP3 genomic sequence
HQ634152.1	Prochlorococcus phage P-SSP6, complete genome. [26-MAY-2017]
AY939843.2	Prochlorococcus phage P-SSP7, complete genome. [26-MAY-2017]
KM359505.1	Prochlorococcus phage P-TIM68, complete genome
GU071105.1	Prochlorococcus phage Syn1, complete genome. [25-AUG-2017]
JX262224.1	Propionibacterium phage ATCC29399B_T, complete genome. [26-MAY-2017]
KR337651.1	Propionibacterium phage Attacne, complete genome
KR347352.1	Propionibacterium phage BruceLethal, complete genome
KR337645.1	Propionibacterium phage Kubed, complete genome
KR337650.1	Propionibacterium phage Lauchelly, complete genome
KR347354.1	Propionibacterium phage Moyashi, complete genome
KR337643.1	Propionibacterium phage MrAK, complete genome
JX262223.1	Propionibacterium phage P1.1, complete genome. [26-MAY-2017]
JX262222.1	Propionibacterium phage P100_1, complete genome. [26-MAY-2017]
JX262221.1	Propionibacterium phage P100_A, complete genome. [26-MAY-2017]
JX262220.1	Propionibacterium phage P100D, complete genome. [26-MAY-2017]
JX262217.1	Propionibacterium phage P101A, complete genome. [26-MAY-2017]
JX262218.1	Propionibacterium phage P104A, complete genome. [26-MAY-2017]
JX262219.1	Propionibacterium phage P105, complete genome. [26-MAY-2017]
JX262216.1	Propionibacterium phage P14.4, complete genome. [26-MAY-2017]
JX262215.1	Propionibacterium phage P9.1, complete genome. [26-MAY-2017]
KT934381.1	Propionibacterium phage PA1-14, complete genome
MG820632.1	Propionibacterium phage pa310, complete genome
MG820644.1	Propionibacterium phage pa33, complete genome
MG820645.1	Propionibacterium phage pa3-SS3, complete genome
MG820633.1	Propionibacterium phage pa59, complete genome
DQ431235.1	Propionibacterium phage PA6, complete genome. [26-MAY-2017]
KR902978.1	Propionibacterium phage PAC1, complete genome
KR902987.1	Propionibacterium phage PAC10, complete genome
KR902979.1	Propionibacterium phage PAC2, complete genome
KR902981.1	Propionibacterium phage PAC4, complete genome
KR902982.1	Propionibacterium phage PAC5, complete genome
KR902983.1	Propionibacterium phage PAC6, complete genome
KR902984.1	Propionibacterium phage PAC7, complete genome
KR902985.1	Propionibacterium phage PAC8, complete genome
KR902986.1	Propionibacterium phage PAC9, complete genome
KJ722067.1	Propionibacterium phage Pacnes 2012-15, complete genome. [26-MAY-2017]
KY926793.1	Propionibacterium phage PacnesP2, complete genome
FJ706171.1	Propionibacterium phage PAD20, complete genome. [26-MAY-2017]
FJ706172.1	Propionibacterium phage PAS50, complete genome. [26-MAY-2017]
KU984979.1	Propionibacterium phage PFR1, complete genome
KU984980.1	Propionibacterium phage PFR2, complete genome
AF428260.1	Propionibacterium phage phiB5, complete genome. [26-MAY-2017]
KJ578758.1	Propionibacterium phage PHL009M11, complete genome. [26-MAY-2017]
JX570704.1	Propionibacterium phage PHL010M04, complete genome. [26-MAY-2017]
KJ578759.1	Propionibacterium phage PHL025M00, complete genome. [26-MAY-2017]
KJ578760.1	Propionibacterium phage PHL030N00, complete genome. [26-MAY-2017]
JX570706.1	Propionibacterium phage PHL037M02, complete genome. [26-MAY-2017]
KJ578761.1	Propionibacterium phage PHL041M10, complete genome. [26-MAY-2017]
KJ578762.1	Propionibacterium phage PHL055N00, complete genome. [26-MAY-2017]
JX570705.1	Propionibacterium phage PHL060L00, complete genome. [26-MAY-2017]
KJ578763.1	Propionibacterium phage PHL064M01, complete genome. [26-MAY-2017]
KJ578764.1	Propionibacterium phage PHL064M02, complete genome. [26-MAY-2017]
KJ578765.1	Propionibacterium phage PHL067M01, complete genome. [26-MAY-2017]
KJ578766.1	Propionibacterium phage PHL067M09, complete genome. [26-MAY-2017]
JX570709.1	Propionibacterium phage PHL067M10, complete genome. [26-MAY-2017]
KJ578767.1	Propionibacterium phage PHL070N00, complete genome. [26-MAY-2017]
JX570710.1	Propionibacterium phage PHL071N05, complete genome. [26-MAY-2017]
KJ578768.1	Propionibacterium phage PHL082M00, complete genome. [26-MAY-2017]
KJ578769.1	Propionibacterium phage PHL082M02, complete genome. [26-MAY-2017]
KJ578771.1	Propionibacterium phage PHL082M04, complete genome. [26-MAY-2017]
JX570707.1	Propionibacterium phage PHL085M01, complete genome. [26-MAY-2017]
KJ578772.1	Propionibacterium phage PHL085N00, complete genome. [26-MAY-2017]
KJ578773.1	Propionibacterium phage PHL092M00, complete genome. [26-MAY-2017]
KJ578774.1	Propionibacterium phage PHL095N00, complete genome. [26-MAY-2017]
JX570702.1	Propionibacterium phage PHL111M01, complete genome. [26-MAY-2017]
JX570714.1	Propionibacterium phage PHL112N00, complete genome. [26-MAY-2017]
JX570713.1	Propionibacterium phage PHL113M01, complete genome. [26-MAY-2017]
JX570712.1	Propionibacterium phage PHL114L00, complete genome. [26-MAY-2017]
KJ578776.1	Propionibacterium phage PHL116M00, complete genome. [26-MAY-2017]
KJ578778.1	Propionibacterium phage PHL117M00, complete genome. [26-MAY-2017]
KJ578779.1	Propionibacterium phage PHL117M01, complete genome. [26-MAY-2017]
KJ578780.1	Propionibacterium phage PHL132N00, complete genome. [26-MAY-2017]
KJ578781.1	Propionibacterium phage PHL141N00, complete genome. [26-MAY-2017]
KJ578782.1	Propionibacterium phage PHL150M00, complete genome. [26-MAY-2017]
KJ578785.1	Propionibacterium phage PHL152M00, complete genome. [26-MAY-2017]
KJ578787.1	Propionibacterium phage PHL171M01, complete genome. [26-MAY-2017]
KJ578788.1	Propionibacterium phage PHL179M00, complete genome. [26-MAY-2017]
KJ578790.1	Propionibacterium phage PHL199M00, complete genome. [26-MAY-2017]
[truncated: 1,135 more rows]
