# Supplementary material for: Viral Dark Matter in the Gut Virome of Elderly Humans
Source: Preprints.org preprint supplement (doi:10.20944/preprints201807.0101.v1), 2018-07-05
Supplement: Supplementary file 8 [file Supp_Table_7_Bacterial.DB.xlsx]

## Sheet: Sheet1
Bacteria_Accession	Bacteria_Fasta_Description
NC_009925.1	Acaryochloris marina MBIC11017, complete genome
NC_021991.1	Acetobacter pasteurianus 386B, complete genome
NC_013209.1	Acetobacter pasteurianus IFO 3283-01 DNA, complete genome
NC_017150.1	Acetobacter pasteurianus IFO 3283-01-42C DNA, complete genome
AP011128.1	Acetobacter pasteurianus IFO 3283-03 DNA, complete genome
NC_017121.1	Acetobacter pasteurianus IFO 3283-07 DNA, complete genome
NC_017125.1	Acetobacter pasteurianus IFO 3283-22 DNA, complete genome
NC_017146.1	Acetobacter pasteurianus IFO 3283-26 DNA, complete genome
NC_017111.1	Acetobacter pasteurianus IFO 3283-32 DNA, complete genome
NC_016894.1	Acetobacterium woodii DSM 1030, complete genome
NC_014378.1	Acetohalobium arabaticum DSM 5501, complete genome
NC_018024.1	Acetomicrobium mobile DSM 13181, complete genome
NC_010163.1	Acholeplasma laidlawii PG-8A, complete genome
LK028559.1	Acholeplasma oculi genome assembly Acholeplasma oculi strain 19L, chromosome : 1
NC_014640.1	Achromobacter xylosoxidans A8, complete genome
CP009448.1	Achromobacter xylosoxidans C54, complete genome
NC_013740.1	Acidaminococcus fermentans DSM 20731, complete genome
NC_016077.1	Acidaminococcus intestini RyC-MR95, complete genome
NC_015518.1	Acidianus hospitalis W1, complete genome
NC_014374.1	Acidilobus saccharovorans 345-15, complete genome
NC_013124.1	Acidimicrobium ferrooxidans DSM 10331, complete genome
NC_009484.1	Acidiphilium cryptum JF-5, complete genome
NC_015186.1	Acidiphilium multivorum AIU301 DNA, complete genome
NC_019395.1	Acidipropionibacterium acidipropionici ATCC 4875, complete genome
NC_015850.1	Acidithiobacillus caldus SM-1, complete genome
NC_015942.1	Acidithiobacillus ferrivorans SS3, complete genome
NC_011761.1	Acidithiobacillus ferrooxidans ATCC 23270, complete genome
NC_011206.1	Acidithiobacillus ferrooxidans ATCC 53993, complete genome
NC_012483.1	Acidobacterium capsulatum ATCC 51196, complete genome
NC_008578.1	Acidothermus cellulolyticus 11B, complete genome
NC_015138.1	Acidovorax avenae subsp. avenae ATCC 19860, complete genome
NC_008752.1	Acidovorax citrulli AAC00-1, complete genome
NC_011992.1	Acidovorax ebreus TPSY, complete genome
NC_008782.1	Acidovorax sp. JS42, complete genome
NC_018708.1	Acidovorax sp. KKS102, complete genome
NC_013926.1	Aciduliprofundum boonei T469, complete genome
NC_019942.1	Aciduliprofundum sp. MAR08-339, complete genome
NC_017162.1	Acinetobacter baumannii 1656-2, complete genome
NC_011586.2	Acinetobacter baumannii AB0057, complete genome
NC_011595.1	Acinetobacter baumannii AB307-0294, complete genome
CP007577.1	Acinetobacter baumannii AC30, complete genome
NC_021726.1	Acinetobacter baumannii BJAB07104, complete genome
NC_021733.1	Acinetobacter baumannii BJAB0715, complete genome
NC_021729.1	Acinetobacter baumannii BJAB0868, complete genome
NC_020547.2	Acinetobacter baumannii D1279779, complete genome
AP014649.1	Acinetobacter baumannii DNA, complete genome, strain: IOMTU 433
CP007712.1	Acinetobacter baumannii LAC-4, complete genome
NC_017847.1	Acinetobacter baumannii MDR-TJ, complete genome
NC_017171.1	Acinetobacter baumannii MDR-ZJ06, complete genome
AP013357.1	Acinetobacter baumannii NCGM 237 DNA, complete genome
NC_010410.1	Acinetobacter baumannii str. AYE, complete genome
CP010397.1	Acinetobacter baumannii strain 6200, complete genome
CP009257.1	Acinetobacter baumannii strain AB030, complete genome
CP009256.1	Acinetobacter baumannii strain AB031, complete genome
CP008706.1	Acinetobacter baumannii strain AB5075-UW, complete genome
CP002522.2	Acinetobacter baumannii TCDC-AB0715, complete genome
NC_023028.1	Acinetobacter baumannii ZW85-1, complete genome
CP010368.1	Acinetobacter nosocomialis strain 6411, complete genome
NC_014259.1	Acinetobacter oleivorans DR1, complete genome
NC_016603.1	Acinetobacter pittii PHEA-2 chromosome, complete genome
NC_005966.1	Acinetobacter sp. ADP1 complete genome
CP007715.1	Actinobacillus equuli subsp. equuli strain 19392, complete genome
NC_009053.1	Actinobacillus pleuropneumoniae L20 serotype 5b complete genome
NC_010939.1	Actinobacillus pleuropneumoniae serovar 7 str. AP76, complete genome
NC_009655.1	Actinobacillus succinogenes 130Z, complete genome
CP009159.1	Actinobacillus suis ATCC 33415, complete genome
NC_022657.1	Actinoplanes friuliensis DSM 7358, complete genome
NC_017093.1	Actinoplanes missouriensis 431 DNA, complete genome
NC_021191.1	Actinoplanes sp. N902-109, complete genome
NC_017803.1	Actinoplanes sp. SE50/110, complete genome
NC_013093.1	Actinosynnema mirum DSM 43827, complete genome
CP008802.1	Actinotignum schaalii strain CCUG 27420 chromosome, complete genome
NC_022567.1	Adlercreutzia equolifaciens DSM 19450 DNA, complete genome
NC_017964.1	Advenella kashmirensis WT001, complete genome
CP003915.1	Advenella mimigardefordensis DPN7, complete genome
NC_018013.1	Aequorivita sublithincola DSM 14238, complete genome
NC_015278.1	Aerococcus urinae ACS-120-V-Col10a, complete genome
CP006579.1	Aeromonas hydrophila 4AK4, complete genome
CP007566.1	Aeromonas hydrophila AL09-71, complete genome
CP006883.1	Aeromonas hydrophila J-1, complete genome
NC_021290.1	Aeromonas hydrophila ML09-119, complete genome
CP007576.1	Aeromonas hydrophila pc104A, complete genome
CP011100.1	Aeromonas hydrophila strain AH10, complete genome
CP010947.1	Aeromonas hydrophila strain AL06-06, complete genome
NC_008570.1	Aeromonas hydrophila subsp. hydrophila ATCC 7966 chromosome, complete genome
CP007567.1	Aeromonas media WS, complete genome
NC_009348.1	Aeromonas salmonicida subsp. salmonicida A449, complete genome
NC_015424.1	Aeromonas veronii B565, complete genome
NC_012913.1	Aggregatibacter aphrophilus NJ8700, complete genome
CP000628.1	Agrobacterium radiobacter K84 chromosome 1, complete sequence
CP000629.1	Agrobacterium radiobacter K84 chromosome 2, complete sequence
CP002248.1	Agrobacterium sp. H13-3 circular chromosome, complete sequence
AE007869.2	Agrobacterium tumefaciens str. C58 circular chromosome, complete sequence
AE007870.2	Agrobacterium tumefaciens str. C58 linear chromosome, complete sequence
CP000633.1	Agrobacterium vitis S4 chromosome 1, complete sequence
CP000634.1	Agrobacterium vitis S4 chromosome 2, complete sequence
NC_010655.1	Akkermansia muciniphila ATCC BAA-835, complete genome
NC_008260.1	Alcanivorax borkumensis SK2, complete genome
NC_018691.1	Alcanivorax dieselolei B5, complete genome
AP014613.1	Alcanivorax sp. NBRC 101098 DNA, complete genome
NC_014910.1	Alicycliphilus denitrificans BC, complete genome
NC_015422.1	Alicycliphilus denitrificans K601, complete genome
NC_013205.1	Alicyclobacillus acidocaldarius subsp. acidocaldarius DSM 446, complete genome
FM178379.1	Aliivibrio salmonicida LFI1238 chromosome 1 complete genome
FM178380.1	Aliivibrio salmonicida LFI1238 chromosome 2 complete genome
NC_018011.1	Alistipes finegoldii DSM 17242, complete genome
NC_008340.1	Alkalilimnicola ehrlichii MLHE-1, complete genome
NC_009633.1	Alkaliphilus metalliredigens QYMF, complete genome
NC_009922.1	Alkaliphilus oremlandii OhILAs, complete genome
NC_013851.1	Allochromatium vinosum DSM 180, complete genome
CP010427.1	Allofrancisella guangzhouensis strain 08HL01032 chromosome, complete genome
NC_018643.1	Alpha proteobacterium HIMB5, complete genome
NC_018644.1	Alpha proteobacterium HIMB59, complete genome
CP008849.1	Alteromonas australica strain H 17, complete genome
NC_018632.1	Alteromonas macleodii ATCC 27126, complete genome
NC_018679.1	Alteromonas macleodii str. 'Balearic Sea AD45', complete genome
NC_018692.1	Alteromonas macleodii str. 'Black Sea 11', complete genome
NC_018678.1	Alteromonas macleodii str. 'English Channel 673', complete genome
CP004846.1	Alteromonas mediterranea 615 strain English Channel 615 chromosome, complete genome
NC_019393.1	Alteromonas mediterranea DE1, complete genome
NC_023045.1	Alteromonas mediterranea MED64, complete genome
NC_021713.1	Alteromonas mediterranea UM7, complete genome
NC_015554.1	Alteromonas naphthalenivorans strain SN2, complete genome
NC_014011.1	Aminobacterium colombiense DSM 12261, complete genome
NC_013385.1	Ammonifex degensii KC4, complete genome
NC_018704.1	Amphibacillus xylanus NBRC 15112 DNA, complete genome
CP008953.1	Amycolatopsis japonica strain MG417-CF17, complete genome
CP007219.1	Amycolatopsis lurida NRRL 2430, complete genome
CP003777.1	Amycolatopsis mediterranei RB, complete genome
NC_022116.1	Amycolatopsis mediterranei RB, complete genome
CP002896.1	Amycolatopsis mediterranei S699, complete genome
CP003729.1	Amycolatopsis mediterranei S699, complete genome
NC_017186.1	Amycolatopsis mediterranei S699, complete genome
NC_018266.1	Amycolatopsis mediterranei S699, complete genome
NC_014318.1	Amycolatopsis mediterranei U32 chromosome, complete genome
CP009110.1	Amycolatopsis methanolica 239, complete genome
NC_021252.1	Amycolatopsis orientalis HCCB10007, complete genome
NC_019771.1	Anabaena cylindrica PCC 7122, complete genome
CP000117.1	Anabaena variabilis ATCC 29413, complete genome
NC_013171.1	Anaerococcus prevotii DSM 20548, complete genome
NC_014960.1	Anaerolinea thermophila UNI-1 DNA, complete genome
NC_011891.1	Anaeromyxobacter dehalogenans 2CP-1, complete genome
NC_007760.1	Anaeromyxobacter dehalogenans 2CP-C, complete genome
NC_009675.1	Anaeromyxobacter sp. Fw109-5, complete genome
NC_011145.1	Anaeromyxobacter sp. K, complete genome
NC_013532.1	Anaplasma centrale str. Israel, complete genome
NC_012026.1	Anaplasma marginale str. Florida, complete genome
NC_004842.2	Anaplasma marginale str. St. Maries, complete genome
NC_007797.1	Anaplasma phagocytophilum HZ, complete genome
NC_021879.1	Anaplasma phagocytophilum str. HZ2, complete genome
NC_021880.1	Anaplasma phagocytophilum str. JM, complete genome
NC_011567.1	Anoxybacillus flavithermus WK1, complete genome
NC_000918.1	Aquifex aeolicus VF5 chromosome, complete genome
NC_014218.1	Arcanobacterium haemolyticum DSM 20595, complete genome
NC_000917.1	Archaeoglobus fulgidus DSM 4304, complete genome
NC_013741.1	Archaeoglobus profundus DSM 5631, complete genome
NC_021169.1	Archaeoglobus sulfaticallidus PM70-1, complete genome
NC_015320.1	Archaeoglobus veneficus SNP6, complete genome
CP006615.1	Arcobacter butzleri 7h1h, complete genome
NC_021878.1	Arcobacter butzleri 7h1h, complete genome
NC_017187.1	Arcobacter butzleri ED-1 DNA, complete genome
NC_009850.1	Arcobacter butzleri RM4018, complete genome
NC_014166.1	Arcobacter nitrofigilis DSM 7299, complete genome
NC_017192.1	Arcobacter sp. L DNA, complete genome
NC_014550.1	Arthrobacter arilaitensis RE117 chromosome, complete sequence
NC_008541.1	Arthrobacter sp. FB24, complete genome
CP011005.1	Arthrobacter sp. IHBB 11108, complete genome
NC_018531.1	Arthrobacter sp. Rue61a, complete genome
NC_007716.1	Aster yellows witches'-broom phytoplasma AYWB, complete genome
CP002395.1	Asticcacaulis excentricus CB 48 chromosome 1, complete sequence
CP002396.1	Asticcacaulis excentricus CB 48 chromosome 2, complete sequence
NC_013203.1	Atopobium parvulum DSM 20469, complete genome
NC_006513.1	Azoarcus aromaticum EbN1 complete genome
NC_008702.1	Azoarcus sp. BH72, complete genome
NC_020516.1	Azoarcus sp. KH32C DNA, complete genome
NC_009937.1	Azorhizobium caulinodans ORS 571 DNA, complete genome
NC_016622.1	Azospirillum lipoferum 4B main chromosome, complete genome
NC_013854.1	Azospirillum sp. B510 DNA, complete genome
CP010415.1	Azotobacter chroococcum NCIMB 8003, complete genome
NC_021149.1	Azotobacter vinelandii CA, complete genome
NC_021150.1	Azotobacter vinelandii CA6, complete genome
NC_012560.1	Azotobacter vinelandii DJ, complete genome
NC_022653.1	Bacillus amyloliquefaciens CC178, complete genome
NC_014551.1	Bacillus amyloliquefaciens DSM7 complete genome
NC_023073.1	Bacillus amyloliquefaciens LFB112, complete genome
NC_017190.1	Bacillus amyloliquefaciens LL3, complete genome
CP010556.1	Bacillus amyloliquefaciens strain L-H15, complete genome
CP011278.1	Bacillus amyloliquefaciens strain L-S60, complete genome
CP007242.1	Bacillus amyloliquefaciens subsp. amyloliquefaciens KHG19, complete genome
NC_016784.1	Bacillus amyloliquefaciens subsp. plantarum CAU B946 complete genome
HG514499.1	Bacillus amyloliquefaciens subsp. plantarum NAU-B3, complete genome
NC_009725.1	Bacillus amyloliquefaciens subsp. plantarum str. FZB42, complete genome
HG328253.1	Bacillus amyloliquefaciens subsp. plantarum UCMB5033, complete genome
NC_020410.1	Bacillus amyloliquefaciens subsp. plantarum UCMB5036 complete genome
HG328254.1	Bacillus amyloliquefaciens subsp. plantarum UCMB5113, complete genome
NC_017061.1	Bacillus amyloliquefaciens subsp. plantarum YAU B9601-Y2 complete genome
NC_017188.1	Bacillus amyloliquefaciens TA208, complete genome
NC_017191.1	Bacillus amyloliquefaciens XH7, complete genome
NC_017912.1	Bacillus amyloliquefaciens Y2, complete genome
NC_012659.1	Bacillus anthracis str. A0248, complete genome
NC_007530.2	Bacillus anthracis str. 'Ames Ancestor', complete genome
NC_003997.3	Bacillus anthracis str. Ames chromosome, complete genome
NC_012581.1	Bacillus anthracis str. CDC 684, complete genome
NC_017729.1	Bacillus anthracis str. H9401, complete genome
NC_005945.1	Bacillus anthracis str. Sterne chromosome, complete genome
CP006742.1	Bacillus anthracis str. SVA11, complete genome
CP009598.1	Bacillus anthracis str. V770-NP-1R, complete genome
CP007666.1	Bacillus anthracis str. Vollum, complete genome
CP007618.1	Bacillus anthracis strain 2000031021, complete genome
CP009902.1	Bacillus anthracis strain 2002013094, complete genome
CP010852.1	Bacillus anthracis strain A1144, complete genome
CP010792.1	Bacillus anthracis strain Ames A0462, complete genome
CP009981.1	Bacillus anthracis strain Ames chromosome, complete genome
CP009544.1	Bacillus anthracis strain BA1015, complete genome
CP009700.1	Bacillus anthracis strain BA1035, complete genome
CP010322.1	Bacillus anthracis strain Canadian_bison, complete genome
CP008853.1	Bacillus anthracis strain Cvac02, complete genome
CP008854.1	Bacillus anthracis strain Han, complete genome
CP008846.1	Bacillus anthracis strain HYU01, complete genome
CP009331.1	Bacillus anthracis strain K3, complete genome
CP009341.1	Bacillus anthracis strain Ohio ACB, complete genome
CP009325.1	Bacillus anthracis strain PAK-1, complete genome
CP009697.1	Bacillus anthracis strain RA3, complete genome
CP009464.1	Bacillus anthracis strain SK-102, complete genome
CP009328.1	Bacillus anthracis strain Vollum 1B, complete genome
NC_014639.1	Bacillus atrophaeus 1942, complete genome
CP010778.1	Bacillus atrophaeus strain NRS 1221A, complete genome
CP007512.1	Bacillus bombysepticus str. Wang, complete genome
NC_014829.1	Bacillus cellulosilyticus DSM 2522, complete genome
CP009318.1	Bacillus cereus 03BB102, complete genome
NC_012472.1	Bacillus cereus 03BB102, complete genome
CP009641.1	Bacillus cereus 03BB108, complete genome
NC_011658.1	Bacillus cereus AH187, complete genome
NC_011773.1	Bacillus cereus AH820, complete genome
NC_004722.1	Bacillus cereus ATCC 14579 chromosome, complete genome
CP009628.1	Bacillus cereus ATCC 4342, complete genome
NC_011725.1	Bacillus cereus B4264, complete genome
NC_014335.1	Bacillus cereus biovar anthracis str. CI, complete genome
CP009300.1	Bacillus cereus D17, complete genome
CP009968.1	Bacillus cereus E33L, complete genome
NC_006274.1	Bacillus cereus E33L, complete genome
NC_016779.1	Bacillus cereus F837/76, complete genome
NC_018491.1	Bacillus cereus FRI-35, complete genome
CP009590.1	Bacillus cereus G9241, complete genome
NC_011772.1	Bacillus cereus G9842, complete genome
NC_016771.1	Bacillus cereus NC7401 genomic DNA, complete genome
NC_011969.1	Bacillus cereus Q1, complete genome
CP009941.1	Bacillus cereus strain 03BB87, complete genome
CP009596.1	Bacillus cereus strain 3a, complete genome
CP009369.1	Bacillus cereus strain FM1, complete genome
CP009686.1	Bacillus cereus strain FORC_005, complete genome
CP008712.1	Bacillus cereus strain FT9, complete genome
CP009605.1	Bacillus cereus strain S2-8, complete genome
NC_006582.1	Bacillus clausii KSM-K16 DNA, complete genome
NC_016023.1	Bacillus coagulans 36D1, complete genome
CP009709.1	Bacillus coagulans DSM 1 = ATCC 7050, complete genome
CP010525.1	Bacillus coagulans strain HM-08, complete genome
NC_009674.1	Bacillus cytotoxicus NVH 391-98, complete genome
NC_002570.2	Bacillus halodurans C-125 DNA, complete genome
NC_022524.1	Bacillus infantis NRRL B-14911, complete genome
CP003923.1	Bacillus lehensis G1, complete genome
NC_006270.3	Bacillus licheniformis ATCC 14580, complete genome
NC_006322.1	Bacillus licheniformis DSM 13 = ATCC 14580, complete genome
NC_014103.1	Bacillus megaterium DSM319, complete genome
CP009920.1	Bacillus megaterium NBRC 15308 = ATCC 14581, complete genome
NC_014019.1	Bacillus megaterium QM B1551, complete genome
CP007739.1	Bacillus methanolicus MGA3, complete genome
CP007626.1	Bacillus mycoides strain 219298, complete genome
CP009692.1	Bacillus mycoides strain ATCC 6462, complete genome
NC_021362.1	Bacillus paralicheniformis ATCC 9945a, complete genome
CP010524.1	Bacillus paralicheniformis strain BL-09, complete genome
NC_013791.2	Bacillus pseudofirmus OF4, complete genome
NC_009848.4	Bacillus pumilus SAFR-032, complete genome
CP007436.1	Bacillus pumilus strain MTCC B6033, complete genome
CP011150.1	Bacillus pumilus strain W3, complete genome
NC_014219.1	Bacillus selenitireducens MLS10, complete genome
NC_021171.1	Bacillus sp. 1NLA3E, complete genome
CP009938.1	Bacillus sp. BH072, complete genome
NC_017743.1	Bacillus sp. JS, complete genome
CP011101.1	Bacillus sp. LM 4-2, complete genome
AP013294.1	Bacillus sp. OxB-1 DNA, complete genome
CP010406.1	Bacillus sp. Pc3, complete genome
CP010075.1	Bacillus sp. WP8, complete genome
CP010014.1	Bacillus sp. YP1, complete genome
AP012496.1	Bacillus subtilis BEST7003 DNA, complete genome
AP012495.1	Bacillus subtilis BEST7613 DNA, complete genome
NC_014976.1	Bacillus subtilis BSn5, complete genome
CP007173.1	Bacillus subtilis HJ5, complete genome
CP011115.1	Bacillus subtilis KCTC 1028, complete genome
NC_022898.1	Bacillus subtilis PY79, complete genome
NC_018520.1	Bacillus subtilis QB928, complete genome
CP009748.1	Bacillus subtilis strain ATCC 13952, complete genome
CP009749.1	Bacillus subtilis strain ATCC 19217, complete genome
CP009611.1	Bacillus subtilis strain Bs-916, complete genome
CP010053.1	Bacillus subtilis strain PS832, complete genome
CP011051.1	Bacillus subtilis strain T30, complete genome
NC_017196.2	Bacillus subtilis subsp. natto BEST195 DNA, complete genome
CP010434.1	Bacillus subtilis subsp. spizizenii strain NRS 231, complete genome
NC_016047.1	Bacillus subtilis subsp. spizizenii TU-B-10, complete genome
NC_020507.1	Bacillus subtilis subsp. subtilis 6051-HGW, complete genome
NC_017195.1	Bacillus subtilis subsp. subtilis RO-NN-1, complete genome
NC_000964.3	Bacillus subtilis subsp. subtilis str. 168 chromosome, complete genome
CP010052.1	Bacillus subtilis subsp. subtilis str. 168, complete genome
CP008698.1	Bacillus subtilis subsp. subtilis str. AG1839, complete genome
NC_020832.1	Bacillus subtilis subsp. subtilis str. BAB-1, complete genome
NC_019896.1	Bacillus subtilis subsp. subtilis str. BSP1, complete genome
CP007800.1	Bacillus subtilis subsp. subtilis str. JH642 substr. AG174, complete genome
CP007409.1	Bacillus subtilis subsp. subtilis str. OH 131.1, complete genome
CP010314.1	Bacillus subtilis subsp. subtilis strain 3NA, complete genome
CP005997.1	Bacillus subtilis TOA, complete genome
NC_020244.1	Bacillus subtilis XF-1, complete genome
NC_014171.1	Bacillus thuringiensis BMB171, complete genome
NC_018877.1	Bacillus thuringiensis Bt407, complete genome
CP009351.1	Bacillus thuringiensis HD1002, complete genome
NC_018500.1	Bacillus thuringiensis HD-771, complete genome
NC_018508.1	Bacillus thuringiensis HD-789, complete genome
NC_018693.1	Bacillus thuringiensis MC28, complete genome
NC_017208.1	Bacillus thuringiensis serovar chinensis CT-43, complete genome
NC_017200.1	Bacillus thuringiensis serovar finitimus YBT-020, complete genome
CP010089.1	Bacillus thuringiensis serovar galleriae strain HD-29, complete genome
CP004870.1	Bacillus thuringiensis serovar kurstaki str. HD-1, complete genome
NC_020238.1	Bacillus thuringiensis serovar kurstaki str. HD73, complete genome
CP007607.1	Bacillus thuringiensis serovar kurstaki str. YBT-1520, complete genome
CP010005.1	Bacillus thuringiensis serovar kurstaki strain HD 1, complete genome
CP010577.1	Bacillus thuringiensis serovar morrisoni strain BGSC 4AA1, complete genome
NC_020376.1	Bacillus thuringiensis serovar thuringiensis str. IS5056, complete genome
NC_008600.1	Bacillus thuringiensis str. Al Hakam, complete genome
CP010088.1	Bacillus thuringiensis strain 97-27, complete genome
CP009335.1	Bacillus thuringiensis strain HD1011, complete genome
CP009600.1	Bacillus thuringiensis strain HD571, complete genome
CP009720.1	Bacillus thuringiensis strain HD682, complete genome
NC_022873.1	Bacillus thuringiensis YBT-1518, complete genome
NC_022781.1	Bacillus toyonensis BCT-7112, complete genome
NC_019842.1	Bacillus velezensis AS43.3, complete genome
CP007165.1	Bacillus velezensis NJN-6, complete genome
CP006890.1	Bacillus velezensis SQR9, complete genome
CP009679.1	Bacillus velezensis strain JS25R chromosome, complete genome
CP007244.1	Bacillus velezensis TrigoCor1448 chromosome, complete genome
NC_010184.1	Bacillus weihenstephanensis KBAB4, complete genome
NC_016620.1	Bacteriovorax marinus SJ genome
CP006772.1	Bacteroidales bacterium CF, complete genome
CP007619.1	Bacteroides dorei isolate HS1_L_1_B_010, complete genome
CP008741.1	Bacteroides dorei isolate HS1_L_3_B_079, complete genome
NC_016776.1	Bacteroides fragilis 638R genome
NC_003228.3	Bacteroides fragilis NCTC 9343, complete genome
CP011073.1	Bacteroides fragilis strain BOB25, complete genome
NC_006347.1	Bacteroides fragilis YCH46 DNA, complete genome
NC_014933.1	Bacteroides helcogenes P 36-108, complete genome
NC_015164.1	Bacteroides salanitronis DSM 18170, complete genome
NC_004663.1	Bacteroides thetaiotaomicron VPI-5482 chromosome, complete genome
NC_009614.1	Bacteroides vulgatus ATCC 8482, complete genome
CP007034.1	Barnesiella viscericola DSM 18177, complete genome
NC_020300.1	Bartonella australis Aust/NH1, complete genome
NC_008783.1	Bartonella bacilliformis KC583, complete genome
FN645454.1	Bartonella clarridgeiae strain 73, complete genome
NC_014932.1	Bartonella clarridgeiae strain 73, complete genome
NC_012846.1	Bartonella grahamii as4aup, complete genome
NC_005956.1	Bartonella henselae strain Houston-1, complete genome
HG965802.1	Bartonella henselae, strain BM1374163 complete genome
CP003784.1	Bartonella quintana RM-11, complete genome
NC_005955.1	Bartonella quintana str. Toulouse, complete genome
NC_010161.1	Bartonella tribocorum CIP 105476 complete genome, type strain CIP 105476
HG969192.1	Bartonella tribocorum main chromosome complete genome, strain BM1374166
NC_020301.1	Bartonella vinsonii subsp. berkhoffii str. Winnie, complete genome
NC_007984.1	Baumannia cicadellinicola str. Hc (Homalodisca coagulata), complete genome
NC_005363.1	Bdellovibrio bacteriovorus complete genome, strain HD100
NC_019567.1	Bdellovibrio bacteriovorus str. Tiberius, complete genome
CP002190.1	Bdellovibrio bacteriovorus W, complete genome
NC_020813.1	Bdellovibrio exovorus JSS, complete genome
NC_010581.1	Beijerinckia indica subsp. indica ATCC 9039, complete genome
NC_018010.1	Belliella baltica DSM 15883, complete genome
NC_018018.1	Bernardetia litoralis DSM 6794, complete genome
NC_020417.1	Beta proteobacterium CB, complete genome
NC_012669.1	Beutenbergia cavernae DSM 12333, complete genome
CP006954.1	Bibersteinia trehalosi USDA-ARS-USMARC-188, complete genome
CP006955.1	Bibersteinia trehalosi USDA-ARS-USMARC-189, complete genome
CP006956.1	Bibersteinia trehalosi USDA-ARS-USMARC-190, complete genome
NC_020515.1	Bibersteinia trehalosi USDA-ARS-USMARC-192, complete genome
CP010437.1	Bifidobacterium adolescentis strain BBMN23, complete genome
AP012322.1	Bifidobacterium angulatum DSM 20098 = JCM 7096 DNA, complete genome
CP010433.1	Bifidobacterium animalis strain A6, complete genome
NC_017834.1	Bifidobacterium animalis subsp. animalis ATCC 25527, complete genome
NC_011835.1	Bifidobacterium animalis subsp. lactis AD011, complete genome
NC_022523.1	Bifidobacterium animalis subsp. lactis ATCC 27673, complete genome
NC_017866.1	Bifidobacterium animalis subsp. lactis B420, complete genome
NC_017214.1	Bifidobacterium animalis subsp. lactis BB-12, complete genome
NC_017867.1	Bifidobacterium animalis subsp. lactis Bi-07, complete genome
NC_021593.1	Bifidobacterium animalis subsp. lactis Bl12, complete genome
NC_017216.2	Bifidobacterium animalis subsp. lactis BLC1, complete genome
NC_017215.1	Bifidobacterium animalis subsp. lactis CNCM I-2494, complete genome
CP007522.1	Bifidobacterium animalis subsp. lactis KLDS2.0603, complete genome
CP009045.1	Bifidobacterium animalis subsp. lactis strain BF052, complete genome
NC_017217.1	Bifidobacterium animalis subsp. lactis V9, complete genome
NC_018720.1	Bifidobacterium asteroides PRL2011, complete genome
AP012323.1	Bifidobacterium bifidum ATCC 29521 = JCM 1255 = DSM 20456 DNA, complete genome
NC_017999.1	Bifidobacterium bifidum BGN4, complete genome
NC_014638.1	Bifidobacterium bifidum PRL2010 chromosome, complete genome
NC_014616.1	Bifidobacterium bifidum S17, complete genome
CP006711.1	Bifidobacterium breve 12L, complete genome
CP006715.1	Bifidobacterium breve 689b, complete genome
NC_017218.1	Bifidobacterium breve ACS-071-V-Sch8b, complete genome
AP012324.1	Bifidobacterium breve DSM 20213 = JCM 1192 DNA, complete genome
CP006714.1	Bifidobacterium breve NCFB 2258, complete genome
CP006716.1	Bifidobacterium breve S27, complete genome
NC_020517.1	Bifidobacterium breve UCC2003, complete genome
AP012325.1	Bifidobacterium catenulatum DSM 16992 = JCM 1194 = LMG 11043 DNA, complete genome
CP007287.1	Bifidobacterium coryneforme strain LMG18911, complete genome
AP012326.1	Bifidobacterium dentium JCM 1195 = DSM 20436 DNA, complete genome
CP006018.1	Bifidobacterium indicum LMG 11587 = DSM 20214, complete genome
AP012327.1	Bifidobacterium kashiwanohense JCM 15439 = DSM 21854 DNA, complete genome
CP007456.1	Bifidobacterium kashiwanohense PV20-2, complete genome
NC_010816.1	Bifidobacterium longum DJO10A, complete genome
AP014658.1	Bifidobacterium longum DNA, complete genome, strain: 105-A
NC_004307.2	Bifidobacterium longum NCC2705 chromosome, complete genome
CP008885.1	Bifidobacterium longum strain BXY01, complete genome
NC_015052.1	Bifidobacterium longum subsp. infantis 157F DNA, complete genome
NC_017219.1	Bifidobacterium longum subsp. infantis ATCC 15697 = JCM 1222 = DSM 20088 DNA, complete genome
NC_011593.1	Bifidobacterium longum subsp. infantis ATCC 15697, complete genome
NC_014656.1	Bifidobacterium longum subsp. longum BBMN68, complete genome
CP006741.1	Bifidobacterium longum subsp. longum GT15, complete genome
NC_015067.1	Bifidobacterium longum subsp. longum JCM 1217 DNA, complete genome
NC_014169.1	Bifidobacterium longum subsp. longum JDM301, complete genome
AP012330.1	Bifidobacterium pseudocatenulatum DSM 20438 = JCM 1200 = LMG 10505 DNA, complete genome
CP007457.1	Bifidobacterium pseudolongum PV8-2, complete genome
AP012331.1	Bifidobacterium scardovii JCM 12489 = DSM 13734 DNA, complete genome
NC_020546.1	Bifidobacterium thermophilum RBL67, complete genome
NC_016943.1	Blastococcus saxobsidens DD2 complete genome
NC_017924.1	Blattabacterium sp. (Blaberus giganteus), complete genome
NC_020195.1	Blattabacterium sp. (Blatta orientalis) str. Tarazona, complete genome
NC_013454.1	Blattabacterium sp. (Blattella germanica) str. Bge, complete genome
NC_016621.1	Blattabacterium sp. (Cryptocercus punctulatus) str. Cpu, complete genome
CP005488.1	Blattabacterium sp. (Nauphoeta cinerea), complete genome
NC_022550.1	Blattabacterium sp. (Nauphoeta cinerea), complete genome
NC_020510.1	Blattabacterium sp. (Panesthia angustipennis spadica) str. BPAA DNA, complete genome
NC_013418.2	Blattabacterium sp. (Periplaneta americana) str. BPLAN, complete genome
CP010049.1	Blochmannia endosymbiont of Camponotus (Colobopsis) obliquus strain 757, complete genome
CP010048.1	Blochmannia endosymbiont of Polyrhachis (Hedomyrma) turneri strain 675, complete genome
NC_005061.1	Blochmannia floridanus complete genome
NC_010645.1	Bordetella avium 197N complete genome
AP014582.1	Bordetella bronchiseptica DNA, complete genome, strain: S798
HE965807.1	Bordetella bronchiseptica MO149 complete genome
NC_018829.1	Bordetella bronchiseptica MO149 complete genome
NC_002927.3	Bordetella bronchiseptica strain RB50, complete genome
CP007495.1	Bordetella holmesii 44057, complete genome
CP007494.1	Bordetella holmesii ATCC 51541, complete genome
NC_018828.1	Bordetella parapertussis Bpp5, complete genome
NC_002928.3	Bordetella parapertussis strain 12822, complete genome
CP010323.1	Bordetella pertussis 137, complete genome
NC_018518.1	Bordetella pertussis 18323 complete genome
CP009751.1	Bordetella pertussis B1917, complete genome
CP009752.1	Bordetella pertussis B1920, complete genome
NC_002929.2	Bordetella pertussis Tohama I chromosome, complete genome
NC_010170.1	Bordetella petrii strain DSM 12804, complete genome
NC_018887.1	Borrelia afzelii HLJ01, complete genome
CP009058.1	Borrelia afzelii K78, complete genome
NC_008277.1	Borrelia afzelii PKo, complete genome
NC_017238.1	Borrelia afzelii PKo, complete genome
CP009212.1	Borrelia afzelii Tom3107, complete genome
CP005829.1	Borrelia anserina BA2, complete genome
CP005925.1	Borrelia burgdorferi CA382, complete genome
NC_022048.1	Borrelia burgdorferi CA382, complete genome
NC_017403.1	Borrelia burgdorferi JD1, complete genome
NC_017418.1	Borrelia burgdorferi N40, complete genome
NC_011728.1	Borrelia burgdorferi ZS7, complete genome
CP005745.1	Borrelia coriaceae Co53, complete genome
CP004267.1	Borrelia crocidurae DOU, complete genome
NC_017808.1	Borrelia crocidurae str. Achema, complete genome
NC_011229.1	Borrelia duttonii Ly, complete genome
CP003151.1	Borrelia garinii BgVir chromosome linear, complete sequence
NC_018747.1	Borrelia garinii NMJW1, complete genome
CP007564.1	Borrelia garinii SZ, complete genome
NC_010673.1	Borrelia hermsii DAH, complete genome
CP005680.1	Borrelia hermsii MTW, complete genome
CP005706.1	Borrelia hermsii YBT, complete genome
CP004146.1	Borrelia hermsii YOR, complete genome
CP006647.2	Borrelia miyamotoi LB-2001, complete genome
NC_022079.2	Borrelia miyamotoi LB-2001, complete genome
CP010308.1	Borrelia miyamotoi strain CT14D4, complete genome
NC_011244.1	Borrelia recurrentis A1, complete genome
NC_008710.1	Borrelia turicatae 91E135, complete genome
CP000013.1	Borreliella bavariensis PBi chromosome, complete genome
NC_015921.1	Borreliella bissettii DN127, complete genome
CP009656.1	Borreliella burgdorferi strain B31 chromosome clone 5A1, complete genome
CP009910.1	Borreliella chilensis strain VA1 chromosome, complete genome
CP009117.1	Borreliella valaisiana Tom4006 chromosome, complete genome
NC_013172.1	Brachybacterium faecium DSM 4810 chromosome, complete genome
NC_012225.1	Brachyspira hyodysenteriae WA1, complete genome
NC_017243.1	Brachyspira intermedia PWS/A, complete genome
NC_014150.1	Brachyspira murdochii DSM 12563, complete genome
NC_014330.1	Brachyspira pilosicoli 95/1000, complete genome
NC_019908.1	Brachyspira pilosicoli P43/6/78, complete genome
AP014685.1	Bradyrhizobium diazoefficiens DNA, complete genome, strain: NK6
CP010313.1	Bradyrhizobium japonicum strain E109, complete genome
NC_004463.1	Bradyrhizobium japonicum USDA 110 chromosome, complete genome
NC_017249.1	Bradyrhizobium japonicum USDA 6 DNA, complete genome
NC_020453.1	Bradyrhizobium oligotrophicum S58 DNA, complete genome
NC_009485.1	Bradyrhizobium sp. BTAi1, complete genome
NC_009445.1	Bradyrhizobium sp. ORS278,complete sequence
NC_017082.1	Bradyrhizobium sp. S23321 DNA, complete genome
NC_012491.1	Brevibacillus brevis NBRC 100599 DNA, complete genome
NC_014375.1	Brevundimonas subvibrioides ATCC 15264, complete genome
CP003176.1	Brucella abortus A13334 chromosome 1, complete sequence
CP003177.1	Brucella abortus A13334 chromosome 2, complete sequence
AE017223.1	Brucella abortus biovar 1 str. 9-941 chromosome I, complete sequence
AE017224.1	Brucella abortus biovar 1 str. 9-941 chromosome II, complete sequence
CP000887.1	Brucella abortus S19 chromosome 1, complete sequence
CP000888.1	Brucella abortus S19 chromosome 2, complete sequence
CP000872.1	Brucella canis ATCC 23365 chromosome I, complete sequence
CP000873.1	Brucella canis ATCC 23365 chromosome II, complete sequence
CP003174.1	Brucella canis HSK A52141 chromosome 1, complete sequence
CP003175.1	Brucella canis HSK A52141 chromosome 2, complete sequence
CP001488.1	Brucella melitensis ATCC 23457 chromosome I, complete sequence
CP001489.1	Brucella melitensis ATCC 23457 chromosome II, complete sequence
AM040264.1	Brucella melitensis biovar Abortus 2308 chromosome I, complete sequence, strain 2308
AM040265.1	Brucella melitensis biovar Abortus 2308 chromosome II, complete sequence, strain 2308
CP001851.1	Brucella melitensis M5-90 chromosome I, complete sequence
CP002931.1	Brucella melitensis NI chromosome I, complete sequence
CP002932.1	Brucella melitensis NI chromosome II, complete sequence
CP000708.1	Brucella ovis ATCC 25840 chromosome I, complete sequence
CP000709.1	Brucella ovis ATCC 25840 chromosome II, complete sequence
AE014291.4	Brucella suis 1330 chromosome I, complete sequence
AE014292.2	Brucella suis 1330 chromosome II, complete sequence
CP000911.1	Brucella suis ATCC 23445 chromosome I, complete sequence
CP000912.1	Brucella suis ATCC 23445 chromosome II, complete sequence
CP003128.1	Brucella suis VBI22 chromosome I, complete sequence
CP003129.1	Brucella suis VBI22 chromosome II, complete sequence
NC_011833.1	Buchnera aphidicola str. 5A (Acyrthosiphon pisum), complete genome
NC_017256.1	Buchnera aphidicola str. Ak (Acyrthosiphon kondoi), complete genome
NC_002528.1	Buchnera aphidicola str. APS (Acyrthosiphon pisum) chromosome, complete genome
NC_004545.1	Buchnera aphidicola str. Bp (Baizongia pistaciae), complete genome
CP002703.1	Buchnera aphidicola str. F009 (Myzus persicae), complete genome
CP002701.1	Buchnera aphidicola str. G002 (Myzus persicae), complete genome
NC_017253.1	Buchnera aphidicola str. JF99 (Acyrthosiphon pisum), complete genome
NC_017255.1	Buchnera aphidicola str. LL01 (Acyrthosiphon pisum), complete genome
NC_004061.1	Buchnera aphidicola str. Sg (Schizaphis graminum), complete genome
NC_017252.1	Buchnera aphidicola str. TLW03 (Acyrthosiphon pisum), complete genome
NC_011834.1	Buchnera aphidicola str. Tuc7 (Acyrthosiphon pisum), complete genome
NC_017259.1	Buchnera aphidicola str. Ua (Uroleucon ambrosiae), complete genome
CP002697.1	Buchnera aphidicola str. USDA (Myzus persicae), complete genome
CP002699.1	Buchnera aphidicola str. W106 (Myzus persicae), complete genome
CP000440.1	Burkholderia ambifaria AMMD chromosome 1, complete sequence
CP000441.1	Burkholderia ambifaria AMMD chromosome 2, complete sequence
CP000442.1	Burkholderia ambifaria AMMD chromosome 3, complete sequence
CP001025.1	Burkholderia ambifaria MC40-6 chromosome 1, complete sequence
CP001026.1	Burkholderia ambifaria MC40-6 chromosome 2, complete sequence
CP001027.1	Burkholderia ambifaria MC40-6 chromosome 3, complete sequence
CP000378.1	Burkholderia cenocepacia AU 1054 chromosome 1, complete sequence
CP000379.1	Burkholderia cenocepacia AU 1054 chromosome 2, complete sequence
CP000380.1	Burkholderia cenocepacia AU 1054 chromosome 3, complete sequence
HG938370.1	Burkholderia cenocepacia H111 chromosome 1 complete genome
HG938371.2	Burkholderia cenocepacia H111 chromosome 2, complete genome
HG938372.1	Burkholderia cenocepacia H111 chromosome 3, complete genome
CP000458.1	Burkholderia cenocepacia HI2424 chromosome 1, complete sequence
CP000459.1	Burkholderia cenocepacia HI2424 chromosome 2, complete sequence
CP000460.1	Burkholderia cenocepacia HI2424 chromosome 3, complete sequence
AM747720.1	Burkholderia cenocepacia J2315 chromosome 1, complete genome
AM747721.1	Burkholderia cenocepacia J2315 chromosome 2, complete genome
AM747722.1	Burkholderia cenocepacia J2315 chromosome 3, complete genome
CP000958.1	Burkholderia cenocepacia MC0-3 chromosome 1, complete sequence
CP000959.1	Burkholderia cenocepacia MC0-3 chromosome 2, complete sequence
CP000960.1	Burkholderia cenocepacia MC0-3 chromosome 3, complete sequence
CP011301.1	Burkholderia cepacia strain LO6, complete genome
CP002599.1	Burkholderia gladioli BSR3 chromosome 1, complete sequence
CP001503.2	Burkholderia glumae BGR1 chromosome 1, complete sequence
CP001504.2	Burkholderia glumae BGR1 chromosome 2, complete sequence
CP000151.1	Burkholderia lata strain 383 chromosome 1, complete sequence
CP000152.1	Burkholderia lata strain 383 chromosome 2, complete sequence
CP000150.1	Burkholderia lata strain 383 chromosome 3, complete sequence
CP000010.1	Burkholderia mallei ATCC 23344 chromosome 1, complete sequence
CP000011.2	Burkholderia mallei ATCC 23344 chromosome 2, complete sequence
CP000546.1	Burkholderia mallei NCTC 10229 chromosome I, complete sequence
CP000545.1	Burkholderia mallei NCTC 10229 chromosome II, complete sequence
CP000548.1	Burkholderia mallei NCTC 10247 chromosome I, complete sequence
CP000547.1	Burkholderia mallei NCTC 10247 chromosome II, complete sequence
CP000526.1	Burkholderia mallei SAVP1 chromosome I, complete sequence
CP000525.1	Burkholderia mallei SAVP1 chromosome II, complete sequence
CP000868.1	Burkholderia multivorans ATCC 17616 chromosome 1, complete sequence
CP000869.1	Burkholderia multivorans ATCC 17616 chromosome 2, complete sequence
CP000870.1	Burkholderia multivorans ATCC 17616 chromosome 3, complete sequence
AP009385.1	Burkholderia multivorans ATCC 17616 DNA, complete genome, chromosome 1
AP009386.1	Burkholderia multivorans ATCC 17616 genomic DNA, complete genome, chromosome 2
AP009387.1	Burkholderia multivorans ATCC 17616 genomic DNA, complete genome, chromosome 3
CP000572.1	Burkholderia pseudomallei 1106a chromosome I, complete sequence
CP000573.1	Burkholderia pseudomallei 1106a chromosome II, complete sequence
CP000124.1	Burkholderia pseudomallei 1710b chromosome I, complete sequence
CP000125.1	Burkholderia pseudomallei 1710b chromosome II, complete sequence
CP000570.1	Burkholderia pseudomallei 668 chromosome I, complete sequence
CP000571.1	Burkholderia pseudomallei 668 chromosome II, complete sequence
CP001408.1	Burkholderia pseudomallei MSHR346 chromosome I, complete sequence
BX571965.1	Burkholderia pseudomallei strain K96243, chromosome 1, complete sequence
BX571966.1	Burkholderia pseudomallei strain K96243, chromosome 2, complete sequence
CP009585.1	Burkholderia pseudomallei strain PHLS 112 chromosome I, complete sequence
CP009586.1	Burkholderia pseudomallei strain PHLS 112 chromosome II, complete sequence
CP002519.1	Burkholderia sp. CCGE1001 chromosome 1, complete sequence
CP002520.1	Burkholderia sp. CCGE1001 chromosome 2, complete sequence
CP002013.1	Burkholderia sp. CCGE1002 chromosome 1, complete sequence
CP002014.1	Burkholderia sp. CCGE1002 chromosome 2, complete sequence
CP002015.1	Burkholderia sp. CCGE1002 chromosome 3, complete sequence
CP002217.1	Burkholderia sp. CCGE1003 chromosome 1, complete sequence
CP002218.1	Burkholderia sp. CCGE1003 chromosome 2, complete sequence
AP013058.1	Burkholderia sp. RPE64 DNA, chromosome 1, complete genome
AP013060.1	Burkholderia sp. RPE64 DNA, chromosome 3, complete genome
AP014576.1	Burkholderia sp. RPE67 DNA, complete genome, chromosome: 1
AP014577.1	Burkholderia sp. RPE67 DNA, complete genome, chromosome: 2
AP014578.1	Burkholderia sp. RPE67 DNA, complete genome, chromosome: 3
CP003087.1	Burkholderia sp. YI23 chromosome 1, complete sequence
CP003088.1	Burkholderia sp. YI23 chromosome 2, complete sequence
CP003089.1	Burkholderia sp. YI23 chromosome 3, complete sequence
CP000086.1	Burkholderia thailandensis E264 chromosome I, complete sequence
CP000085.1	Burkholderia thailandensis E264 chromosome II, complete sequence
CP000614.1	Burkholderia vietnamiensis G4 chromosome 1, complete sequence
CP000615.1	Burkholderia vietnamiensis G4 chromosome 2, complete sequence
CP000616.1	Burkholderia vietnamiensis G4 chromosome 3, complete sequence
NC_012034.1	Caldicellulosiruptor bescii DSM 6725, complete genome
NC_014652.1	Caldicellulosiruptor hydrothermalis 108, complete genome
NC_014721.1	Caldicellulosiruptor kristjanssonii I77R1B, complete genome
NC_014720.1	Caldicellulosiruptor kronotskyensis 2002, complete genome
NC_015949.1	Caldicellulosiruptor lactoaceticus 6A, complete genome
NC_014392.1	Caldicellulosiruptor obsidiansis OB47, complete genome
NC_014657.1	Caldicellulosiruptor owensensis OL, complete genome
NC_009437.1	Caldicellulosiruptor saccharolyticus DSM 8903, complete genome
NC_017079.1	Caldilinea aerophila DSM 14535 = NBRC 104270 DNA, complete genome
NC_017096.1	Caldisericum exile AZM16c01 DNA, complete genome
NC_019791.1	Caldisphaera lagunensis DSM 15908, complete genome
NC_014758.1	Calditerrivibrio nitroreducens DSM 19672, complete genome
NC_009954.1	Caldivirga maquilingensis IC-167, complete genome
NC_019751.1	Calothrix sp. PCC 6303, complete genome
NC_019682.1	Calothrix sp. PCC 7507, complete genome
CP006702.1	Campylobacter coli 15-537360, complete genome
NC_022660.1	Campylobacter coli 15-537360, complete genome
NC_022347.1	Campylobacter coli CVM N29710, complete genome
CP007183.1	Campylobacter coli RM1875, complete genome
CP007181.1	Campylobacter coli RM4661, complete genome
CP007179.1	Campylobacter coli RM5611, complete genome
NC_009802.2	Campylobacter concisus 13826, complete genome
NC_009715.2	Campylobacter curvus 525.92, complete genome
CP008808.1	Campylobacter fetus subsp. fetus 04/554, complete genome
NC_008599.1	Campylobacter fetus subsp. fetus 82-40, complete genome
CP006833.1	Campylobacter fetus subsp. testudinum 03-427, complete genome
NC_022759.1	Campylobacter fetus subsp. testudinum 03-427, complete genome
CP009226.1	Campylobacter fetus subsp. testudinum strain pet-3, complete genome
CP008810.1	Campylobacter fetus subsp. venerealis 97/608
HG004426.1	Campylobacter fetus subsp. venerealis str. 84-112, complete genome
NC_009714.1	Campylobacter hominis ATCC BAA-381, complete genome
CP009043.1	Campylobacter iguaniorum strain 1485E chromosome, complete genome
CP007770.1	Campylobacter insulaenigrae NCTC 12927, complete genome
NC_021834.1	Campylobacter jejuni 32488, complete sequence
HG428754.1	Campylobacter jejuni 4031 genome sequence
NC_003912.7	Campylobacter jejuni RM1221, complete genome
NC_009707.1	Campylobacter jejuni subsp. doylei 269.97, complete genome
CP006729.2	Campylobacter jejuni subsp. jejuni 00-2425, complete genome
NC_022362.2	Campylobacter jejuni subsp. jejuni 00-2425, complete genome
NC_022352.2	Campylobacter jejuni subsp. jejuni 00-2426, complete genome
NC_022351.2	Campylobacter jejuni subsp. jejuni 00-2538, complete genome
NC_022353.2	Campylobacter jejuni subsp. jejuni 00-2544, complete genome
NC_009839.1	Campylobacter jejuni subsp. jejuni 81116, complete genome
NC_008787.1	Campylobacter jejuni subsp. jejuni 81-176, complete genome
CP005388.1	Campylobacter jejuni subsp. jejuni CG8421, complete genome
CP006851.1	Campylobacter jejuni subsp. jejuni F38011, complete genome
NC_017279.1	Campylobacter jejuni subsp. jejuni IA3902, complete genome
CP002029.1	Campylobacter jejuni subsp. jejuni ICDCCJ07001, complete genome
NC_017280.1	Campylobacter jejuni subsp. jejuni M1, complete genome
NC_002163.1	Campylobacter jejuni subsp. jejuni NCTC 11168 = ATCC 700819 chromosome, complete genome
HE978252.1	Campylobacter jejuni subsp. jejuni NCTC 11168-BN148 complete genome
CP006689.1	Campylobacter jejuni subsp. jejuni NCTC 11168-GSv, complete genome
CP006685.1	Campylobacter jejuni subsp. jejuni NCTC 11168-K12E5, complete genome
CP006686.1	Campylobacter jejuni subsp. jejuni NCTC 11168-Kf1, complete genome
CP006687.1	Campylobacter jejuni subsp. jejuni NCTC 11168-mcK12E5, complete genome
CP006688.1	Campylobacter jejuni subsp. jejuni NCTC 11168-mfK12E5, complete genome
NC_018709.4	Campylobacter jejuni subsp. jejuni PT14, complete genome
CP005081.1	Campylobacter jejuni subsp. jejuni R14, complete genome
NC_017281.1	Campylobacter jejuni subsp. jejuni S3, complete genome
CP010301.1	Campylobacter jejuni subsp. jejuni strain 00-0949, complete genome
CP010306.1	Campylobacter jejuni subsp. jejuni strain 00-1597, complete genome
CP010307.1	Campylobacter jejuni subsp. jejuni strain 00-6200, complete genome
CP010072.1	Campylobacter jejuni subsp. jejuni strain 01-1512, complete genome
CP008787.1	Campylobacter jejuni subsp. jejuni strain MTVDSCj20, complete genome
CP010058.1	Campylobacter jejuni subsp. jejuni strain YH001, complete genome
CP007775.1	Campylobacter lari NCTC 11845 chromosome, complete genome
CP007777.1	Campylobacter lari RM16701 chromosome, complete genome
CP007778.1	Campylobacter lari RM16712 chromosome, complete genome
NC_012039.1	Campylobacter lari RM2100, complete genome
CP007771.1	Campylobacter lari subsp. concheus LMG 11760, complete genome
CP007766.1	Campylobacter peloridis LMG 23910, complete genome
CP007769.1	Campylobacter sp. RM16704, complete genome
CP007772.1	Campylobacter subantarcticus LMG 24374, complete genome
CP007773.1	Campylobacter subantarcticus LMG 24377, complete genome
CP007774.1	Campylobacter volucris LMG 24379, complete genome
CP006914.1	Candidate division WWE3 bacterium RAAC2_WWE3_1 chromosome, complete genome
NC_013194.1	Candidatus Accumulibacter phosphatis clade IIA str. UW-1, complete genome
NC_010830.1	Candidatus Amoebophilus asiaticus 5a2, complete genome
NC_015913.1	Candidatus Arthromitus sp. SFB-mouse-Japan DNA, complete genome
NC_017294.1	Candidatus Arthromitus sp. SFB-mouse-Yit DNA, complete genome
NC_016012.1	Candidatus Arthromitus sp. SFB-rat-Yit DNA, complete genome
NC_013771.1	Candidatus Atelocyanobacterium thalassa isolate ALOHA, complete genome
NC_011565.1	Candidatus Azobacteroides pseudotrichonymphae genomovar. CFP2 DNA, complete genome
HG793133.1	Candidatus Babela massiliensis strain BABL1 complete genome
CP008985.1	Candidatus Baumannia cicadellinicola strain BGSS, complete genome
NC_020075.1	Candidatus Blochmannia chromaiodes str. 640, complete genome
NC_007292.1	Candidatus Blochmannia pennsylvanicus str. BPEN, complete genome
NC_014909.2	Candidatus Blochmannia vafer str. BVAF, complete genome
CP008936.1	Candidatus Caedibacter acanthamoebae, complete genome
NC_020449.1	Candidatus Cloacamonas acidaminovorans str. Evry provisional genome sequence from WWE1 candidate division
NC_010424.1	Candidatus Desulforudis audaxviator MP104C, complete genome
NC_019566.1	Candidatus Endolissoclinum faulkneri L2, complete genome
CP006745.1	Candidatus Endolissoclinum faulkneri L5, complete genome
NC_019814.1	Candidatus Kinetoplastibacterium blastocrithidii (ex Angomonas deanei ATCC 30255), complete genome
NC_020285.1	Candidatus Kinetoplastibacterium blastocrithidii TCC012E, complete genome
NC_019815.1	Candidatus Kinetoplastibacterium crithidii (ex Angomonas deanei ATCC 30255), complete genome
NC_020283.1	Candidatus Kinetoplastibacterium crithidii TCC036E, complete genome
NC_020294.1	Candidatus Kinetoplastibacterium desouzaii TCC079E, complete genome
NC_020284.1	Candidatus Kinetoplastibacterium galatii TCC219, complete genome
NC_020299.1	Candidatus Kinetoplastibacterium oncopeltii TCC290E, complete genome
NC_010482.1	Candidatus Korarchaeum cryptofilum OPF8, complete genome
NC_008009.1	Candidatus Koribacter versatilis Ellin345, complete genome
CP006604.1	Candidatus Liberibacter americanus str. Sao Paulo, complete genome
NC_022793.1	Candidatus Liberibacter americanus str. Sao Paulo, complete genome
AP014595.1	Candidatus Liberibacter asiaticus str. Ishi-1 DNA, complete genome
NC_012985.3	Candidatus Liberibacter asiaticus str. psy62, complete genome
NC_021353.1	Candidatus Methanomassiliicoccus intestinalis Issoire-Mx1, complete genome
NC_020913.1	Candidatus Methanomethylophilus alvus Mx1201, complete genome
FP565575.1	Candidatus Methylomirabilis oxyfera complete genome
NC_015722.1	Candidatus Midichloria mitochondrii IricVA, complete genome
NC_015735.1	Candidatus Moranella endobia PCIT, complete genome
NC_021057.1	Candidatus Moranella endobia PCVAL, complete genome
CP007711.1	Candidatus Mycoplasma girerdii strain VCU_M1, complete genome
CP003731.1	Candidatus Mycoplasma haemolamae str. Purdue, complete genome
NC_018656.1	Candidatus Nitrosopumilus sp. AR2, complete genome
NC_014355.1	Candidatus Nitrospira defluvii chromosome, complete genome
NC_022547.1	Candidatus Pantoea carbekii DNA, complete genome
CP010907.1	Candidatus Pantoea carbekii strain US, complete genome
CP008941.1	Candidatus Paracaedibacter acanthamoebae isolate PRA3, complete genome
NC_015380.1	Candidatus Pelagibacter sp. IMCC9063, complete genome
NC_007205.1	Candidatus Pelagibacter ubique HTCC1062, complete genome
NC_010544.1	Candidatus Phytoplasma australiense complete genome
CU469464.1	Candidatus Phytoplasma mali strain AT complete chromosome
NC_011047.1	Candidatus Phytoplasma mali strain AT complete chromosome
NC_014010.1	Candidatus Puniceispirillum marinum IMCC1322, complete genome
NC_014109.1	Candidatus Riesia pediculicola USDA, complete genome
NC_008610.1	Candidatus Ruthia magnifica str. Cm (Calyptogena magnifica), complete genome
CP006915.1	Candidatus Saccharibacteria bacterium RAAC3_TM7_1, complete genome
CP007496.1	Candidatus Saccharibacteria oral taxon TM7x, complete genome
CP005957.1	Candidatus Saccharimonas aalborgensis, complete genome
CP006568.1	Candidatus Sodalis pierantonius str. SOPE, complete genome
NC_008536.1	Candidatus Solibacter usitatus Ellin6076, complete genome
CP003920.1	Candidatus Sulfuricurvum sp. RIFRC-1, complete genome
NC_022576.1	Candidatus Symbiobacter mobilis CR, complete genome
AP014521.1	Candidatus Tachikawaea gelatinosa DNA, complete genome
NC_009465.1	Candidatus Vesicomyosocius okutanii HA DNA, complete genome
NC_015846.1	Capnocytophaga canimorsus Cc5, complete genome
NC_013162.1	Capnocytophaga ochracea DSM 7271, complete genome
NC_007503.1	Carboxydothermus hydrogenoformans Z-2901, complete genome
CP006812.1	Carnobacterium inhibens subsp. gilichinskyi strain WN1359, complete genome
NC_022606.1	Carnobacterium inhibens subsp. gilichinskyi strain WN1359, complete genome
HE999757.2	Carnobacterium maltaromaticum LMA28 complete genome
NC_019425.2	Carnobacterium maltaromaticum LMA28 complete genome
NC_015391.1	Carnobacterium sp. 17-4, complete genome
NC_013131.1	Catenulispora acidiphila DSM 44928, complete genome
NC_002696.2	Caulobacter crescentus CB15 chromosome, complete genome
NC_011916.1	Caulobacter crescentus NA1000, complete genome
NC_014100.1	Caulobacter segnis ATCC 21756, complete genome
NC_010338.1	Caulobacter sp. K31, complete genome
CP009458.1	Cedecea neteri strain M006, complete genome
CP009459.1	Cedecea neteri strain ND14a, complete genome
CP009451.1	Cedecea neteri strain SSMD04, complete genome
CP004393.1	Celeribacter indicus strain P73, complete genome
NC_015514.1	Cellulomonas fimi ATCC 484, complete genome
NC_014151.1	Cellulomonas flavigena DSM 20109, complete genome
NC_015671.1	Cellulomonas gilvus ATCC 13127, complete genome
NC_014934.1	Cellulophaga algicola DSM 14237, complete genome
CP009976.1	Cellulophaga baltica 18, complete genome
NC_015167.1	Cellulophaga lytica DSM 7489, complete genome
CP009239.1	Cellulophaga lytica strain HI1, complete genome
NC_010995.1	Cellvibrio japonicus Ueda107, complete genome
NC_019697.1	Chamaesiphon minutus PCC 6605, complete genome
CP007044.2	Chania multitudinisentens RB-25, complete genome
NC_008254.1	Chelativorans sp. BNC1, complete genome
NC_013132.1	Chitinophaga pinensis DSM 2588, complete genome
CP006571.1	Chlamydia avium 10DC88, complete genome
NC_007899.1	Chlamydia felis Fe/C-56 Fe/C-56 DNA, complete genome
CP007276.1	Chlamydia muridarum str. Nigg 2 MCR, complete genome
CP006975.1	Chlamydia muridarum str. Nigg CM972, complete genome
CP006974.1	Chlamydia muridarum str. Nigg3 CMUT3-5 strain Nigg, complete genome
CP009608.1	Chlamydia muridarum strain Nigg3 clone G0.1.1, complete genome
CP009609.1	Chlamydia muridarum strain Nigg3 clone G28.38.1, complete genome
CP009760.1	Chlamydia muridarum strain Nigg3, complete genome
CP007217.1	Chlamydia muridarum strain Nigg3-28, complete genome
NC_022441.1	Chlamydia pecorum P787, complete genome
NC_022439.1	Chlamydia pecorum PV3056/3, complete genome
NC_022440.1	Chlamydia pecorum W73, complete genome
NC_017289.1	Chlamydia psittaci 01DC11, complete genome
NC_017292.1	Chlamydia psittaci 02DC15, complete genome
NC_017290.1	Chlamydia psittaci 08DC60, complete genome
NC_015470.1	Chlamydia psittaci 6BC, complete genome
NC_017287.1	Chlamydia psittaci 6BC, complete genome
CP003790.1	Chlamydia psittaci 84/55, complete genome
NC_017291.1	Chlamydia psittaci C19/98, complete genome
NC_018625.1	Chlamydia psittaci CP3, complete genome
NC_018620.1	Chlamydia psittaci GR9, complete genome
NC_018623.1	Chlamydia psittaci M56, complete genome
CP002744.1	Chlamydia psittaci Mat116 chromosome, complete genome
NC_018627.1	Chlamydia psittaci MN, complete genome
NC_018626.1	Chlamydia psittaci NJ1, complete genome
NC_018621.1	Chlamydia psittaci VS225, complete genome
NC_018624.1	Chlamydia psittaci WC, complete genome
NC_018622.1	Chlamydia psittaci WS/RT/E30, complete genome
NC_010287.1	Chlamydia trachomatis 434/Bu chromosome, complete genome
NC_020966.1	Chlamydia trachomatis A/363 complete genome
NC_007429.1	Chlamydia trachomatis A/HAR-13, complete genome
FM872306.1	Chlamydia trachomatis A2497 serovar A, complete genome
NC_016798.1	Chlamydia trachomatis A2497 serovar A, complete genome
NC_017437.1	Chlamydia trachomatis A2497, complete genome
FM872308.1	Chlamydia trachomatis B/Jali20/OT, complete genome
NC_012686.1	Chlamydia trachomatis B/Jali20/OT, complete genome
FM872307.1	Chlamydia trachomatis B/TZ1A828/OT, complete genome
NC_012687.1	Chlamydia trachomatis B/TZ1A828/OT, complete genome
CP006945.1	Chlamydia trachomatis C/TW-3, complete genome
NC_023060.1	Chlamydia trachomatis C/TW-3, complete genome
NC_000117.1	Chlamydia trachomatis D/UW-3/CX chromosome, complete genome
NC_017434.1	Chlamydia trachomatis D-EC, complete genome
CP002054.1	Chlamydia trachomatis D-LC, complete genome
NC_017436.1	Chlamydia trachomatis D-LC, complete genome
NC_017431.1	Chlamydia trachomatis E/11023, complete genome
NC_017439.1	Chlamydia trachomatis E/150, complete genome
NC_020971.1	Chlamydia trachomatis E/Bour complete genome
HE601801.1	Chlamydia trachomatis E/SW3 complete genome
CP006674.1	Chlamydia trachomatis F/11-96, complete genome
NC_022107.1	Chlamydia trachomatis F/11-96, complete genome
HE601804.1	Chlamydia trachomatis F/SW4 complete genome
HE601805.1	Chlamydia trachomatis F/SW5 complete genome
NC_017440.1	Chlamydia trachomatis G/11074, complete genome
NC_017430.1	Chlamydia trachomatis G/11222, complete genome
NC_017432.1	Chlamydia trachomatis G/9301, complete genome
NC_017429.1	Chlamydia trachomatis G/9768, complete genome
NC_020970.1	Chlamydia trachomatis Ia/SotonIa1 complete genome
NC_020940.1	Chlamydia trachomatis Ia/SotonIa3 complete genome
NC_021892.1	Chlamydia trachomatis J/6276tet1, complete genome
NC_020929.1	Chlamydia trachomatis L1/115 complete genome
NC_020973.1	Chlamydia trachomatis L1/224 complete genome
NC_020930.1	Chlamydia trachomatis L2/25667R complete genome
NC_021052.1	Chlamydia trachomatis L2/434/Bu(f), complete genome
NC_021050.1	Chlamydia trachomatis L2/434/Bu(i), complete genome
NC_020938.1	Chlamydia trachomatis L2b/795 complete genome
NC_020945.1	Chlamydia trachomatis L2b/8200/07 complete genome
NC_010280.2	Chlamydia trachomatis L2b/UCH-1/proctitis complete genome
NC_020931.1	Chlamydia trachomatis L2b/UCH-2 complete genome
NC_015744.1	Chlamydia trachomatis L2c, complete genome
NC_020974.1	Chlamydia trachomatis L3/404/LN complete genome
NC_021890.1	Chlamydia trachomatis RC-F(s)/342, complete genome
NC_021888.1	Chlamydia trachomatis RC-F(s)/852, complete genome
NC_021895.1	Chlamydia trachomatis RC-F/69, complete genome
NC_021891.1	Chlamydia trachomatis RC-J(s)/122, complete genome
NC_021896.1	Chlamydia trachomatis RC-J/943, complete genome
NC_021889.1	Chlamydia trachomatis RC-J/953, complete genome
NC_021898.1	Chlamydia trachomatis RC-J/966, complete genome
NC_021899.1	Chlamydia trachomatis RC-J/971, complete genome
NC_021897.1	Chlamydia trachomatis RC-L2(s)/3, complete genome
NC_021887.1	Chlamydia trachomatis RC-L2(s)/46, complete genome
NC_021893.1	Chlamydia trachomatis RC-L2/55, complete genome
CP006671.1	Chlamydia trachomatis strain F/1-93, complete genome
NC_022117.1	Chlamydia trachomatis strain F/1-93, complete genome
NC_022121.1	Chlamydia trachomatis strain J/31-98, complete genome
CP009923.1	Chlamydia trachomatis strain L2b/CS19/08, complete genome
CP009925.1	Chlamydia trachomatis strain L2b/CS784/08, complete genome
FN652779.2	Chlamydia trachomatis Sweden2, complete genome
NC_017441.1	Chlamydia trachomatis Sweden2, complete genome
CR848038.1	Chlamydophila abortus strain S26/3, complete genome
NC_004552.2	Chlamydophila abortus strain S26/3, complete genome
NC_003361.3	Chlamydophila caviae GPIC, complete genome
NC_015408.1	Chlamydophila pecorum E58, complete genome
AE002161.1	Chlamydophila pneumoniae AR39, complete genome
NC_000922.1	Chlamydophila pneumoniae CWL029 chromosome, complete genome
NC_017285.1	Chlamydophila pneumoniae LPCoLN, complete genome
NC_005043.1	Chlamydophila pneumoniae TW-183, complete genome
CP002514.1	Chloracidobacterium thermophilum B chromosome 1, complete sequence
CP002515.1	Chloracidobacterium thermophilum B chromosome 2, complete sequence
NC_011027.1	Chlorobaculum parvum NCIB 8327, complete genome
NC_007514.1	Chlorobium chlorochromatii CaD3, complete genome
NC_010803.1	Chlorobium limicola DSM 245, complete genome
NC_007512.1	Chlorobium luteolum DSM 273, complete genome
NC_010831.1	Chlorobium phaeobacteroides BS1, complete genome
NC_008639.1	Chlorobium phaeobacteroides DSM 266, complete genome
NC_009337.1	Chlorobium phaeovibrioides DSM 265, complete genome
NC_002932.3	Chlorobium tepidum TLS chromosome, complete genome
NC_011831.1	Chloroflexus aggregans DSM 9485, complete genome
NC_010175.1	Chloroflexus aurantiacus J-10-fl chromosome, complete genome
NC_012032.1	Chloroflexus sp. Y-400-fl, complete genome
NC_011026.1	Chloroherpeton thalassium ATCC 35110, complete genome
NC_005085.1	Chromobacterium violaceum ATCC 12472, complete genome
NC_007963.1	Chromohalobacter salexigens DSM 3043, complete genome
NC_019695.1	Chroococcidiopsis thermalis PCC 7203, complete genome
AP014624.1	Chryseobacterium sp. StRB126 DNA, complete genome
CP011132.1	Citrobacter amalonaticus Y19, complete genome
CP007557.1	Citrobacter freundii CFNIH1, complete genome
NC_009792.1	Citrobacter koseri ATCC BAA-895, complete genome
NC_013716.1	Citrobacter rodentium ICC168, complete genome
CP011043.1	Clavibacter michiganensis subsp. insidiosus strain R1-1, complete genome
AM711867.1	Clavibacter michiganensis subsp. michiganensis NCPPB 382 complete genome
NC_009480.1	Clavibacter michiganensis subsp. michiganensis NCPPB 382 complete genome
NC_020891.1	Clavibacter michiganensis subsp. nebraskensis NCPPB 2581 complete genome
NC_010407.1	Clavibacter michiganensis subsp. sepedonicus complete genome
NC_009089.1	Clostridioides difficile 630, complete genome
NC_003030.1	Clostridium acetobutylicum ATCC 824 chromosome, complete genome
NC_015687.1	Clostridium acetobutylicum DSM 1731, complete genome
NC_017295.1	Clostridium acetobutylicum EA 2018, complete genome
CP006763.1	Clostridium autoethanogenum DSM 10061, complete genome
NC_022592.1	Clostridium autoethanogenum DSM 10061, complete genome
CP006905.1	Clostridium baratii str. Sullivan, complete genome
CP006777.1	Clostridium beijerinckii ATCC 35702, complete genome
NC_009617.1	Clostridium beijerinckii NCIMB 8052, complete genome
HG917868.1	Clostridium bornimense replicon M2/40_rep1, complete genome, type strain M2/40T
HG917869.1	Clostridium bornimense replicon M2/40_rep2, complete genome, type strain M2/40T
CP006903.1	Clostridium botulinum 202F, complete genome
NC_009697.1	Clostridium botulinum A str. ATCC 19397, complete genome
NC_009495.1	Clostridium botulinum A str. ATCC 3502 chromosome, complete genome
NC_009698.1	Clostridium botulinum A str. Hall chromosome, complete genome
NC_012563.1	Clostridium botulinum A2 str. Kyoto, complete genome
NC_010520.1	Clostridium botulinum A3 str. Loch Maree, complete genome
FR745875.1	Clostridium botulinum B str. Eklund 17B(NRP), complete chromosome sequence
NC_018648.1	Clostridium botulinum B str. Eklund 17B(NRP), complete chromosome sequence
NC_010674.1	Clostridium botulinum B str. Eklund 17B, complete genome
NC_010516.1	Clostridium botulinum B1 str. Okra, complete genome
NC_012658.1	Clostridium botulinum Ba4 str. 657, complete genome
NC_015425.1	Clostridium botulinum BKT015925, complete genome
CP006908.1	Clostridium botulinum CDC_1436, complete genome
CP006907.1	Clostridium botulinum CDC_297, complete genome
AP014696.1	Clostridium botulinum DNA, complete genome, strain: 111
NC_010723.1	Clostridium botulinum E3 str. Alaska E43, complete genome
FR773526.1	Clostridium botulinum H04402 065, complete genome sequence
NC_017299.1	Clostridium botulinum H04402 065, complete genome sequence
CP010520.1	Clostridium botulinum strain NCTC 8266, complete genome
CP010521.1	Clostridium botulinum strain NCTC 8550, complete genome
NC_011898.1	Clostridium cellulolyticum H10, complete genome
NC_014393.1	Clostridium cellulovorans 743B, complete genome
NC_016627.1	Clostridium clariflavum DSM 19732, complete genome
FN538970.1	Clostridium difficile CD196 complete genome, strain CD196
NC_013315.1	Clostridium difficile CD196 complete genome, strain CD196
FN665654.1	Clostridium difficile complete genome, strain 2007855
FN665652.1	Clostridium difficile complete genome, strain CF5
NC_017174.1	Clostridium difficile complete genome, strain M120
NC_009706.1	Clostridium kluyveri DSM 555, complete genome
NC_011837.1	Clostridium kluyveri NBRC 12016 DNA, complete genome
NC_015275.1	Clostridium lentocellum DSM 5427, complete genome
NC_014328.1	Clostridium ljungdahlii DSM 13528, complete genome
NC_008593.1	Clostridium novyi NT, complete genome
NC_021182.1	Clostridium pasteurianum BC1, complete genome
CP009267.1	Clostridium pasteurianum DSM 525 = ATCC 6013, complete genome
NC_008261.1	Clostridium perfringens ATCC 13124, complete genome
CP000312.1	Clostridium perfringens SM101, complete genome
NC_003366.1	Clostridium perfringens str. 13 DNA, complete genome
CP006721.1	Clostridium saccharobutylicum DSM 13864, complete genome
NC_022571.1	Clostridium saccharobutylicum DSM 13864, complete genome
NC_014376.1	Clostridium saccharolyticum WM1, complete genome
NC_020291.1	Clostridium saccharoperbutylacetonicum N1-4(HMT), complete genome
CP009933.1	Clostridium scatologenes strain ATCC 25775, complete genome
NC_016791.1	Clostridium sp. BNL1100, complete genome
NC_015737.1	Clostridium sp. SY8519 DNA, complete genome
CP009225.1	Clostridium sporogenes strain NCIMB 10696, complete genome
NC_020887.2	Clostridium stercorarium subsp. stercorarium DSM 8532, complete genome
FP565809.1	Clostridium sticklandii str. DSM 519 chromosome, complete genome
NC_014614.1	Clostridium sticklandii str. DSM 519 chromosome, complete genome
NC_004557.1	Clostridium tetani E88, complete genome
CP009962.1	Collimonas arenae strain Cal35, complete genome
NC_003910.7	Colwellia psychrerythraea 34H, complete genome
AP014569.1	Comamonadaceae bacterium B1 DNA, complete genome
NC_013446.2	Comamonas testosteroni CNB-2, complete genome
CP006704.1	Comamonas testosteroni TK102, complete genome
NC_022549.1	complete chromosome Acholeplasma brassicae
NC_022538.1	complete chromosome Acholeplasma palmae
NC_013739.1	Conexibacter woesei DSM 14684, complete genome
L43967.2 MY	coplasma genitalium G37, complete genome
NC_011295.1	Coprothermobacter proteolyticus DSM 5265, complete genome
NC_014008.1	Coraliomargarita akajimensis DSM 45221, complete genome
CP003389.1	Corallococcus coralloides DSM 2259, complete genome
NC_017030.1	Corallococcus coralloides DSM 2259, complete genome
CP009302.1	Coriobacteriaceae bacterium 68-1-3, complete genome
NC_015389.1	Coriobacterium glomerans PW2, complete genome
NC_022198.1	Corynebacterium argentoratense DSM 44202, complete genome
CP008944.1	Corynebacterium atypicum strain R2070, complete genome
NC_012590.1	Corynebacterium aurimucosum ATCC 700975, complete genome
NC_020506.1	Corynebacterium callunae DSM 20147, complete genome
CP011311.1	Corynebacterium camporealensis strain DSM 44610, complete genome
CP004350.1	Corynebacterium casei LMG S-19264, complete genome
NC_016782.1	Corynebacterium diphtheriae 241, complete genome
NC_016799.1	Corynebacterium diphtheriae 31A, complete genome
NC_016800.1	Corynebacterium diphtheriae BH8, complete genome
NC_016801.1	Corynebacterium diphtheriae C7 (beta), complete genome
NC_016785.1	Corynebacterium diphtheriae CDCE 8392, complete genome
NC_016786.1	Corynebacterium diphtheriae HC01, complete genome
NC_016802.1	Corynebacterium diphtheriae HC02, complete genome
NC_016787.1	Corynebacterium diphtheriae HC03, complete genome
NC_016788.1	Corynebacterium diphtheriae HC04, complete genome
NC_016783.1	Corynebacterium diphtheriae INCA 402, complete genome
NC_002935.2	Corynebacterium diphtheriae NCTC 13129, complete genome
NC_016789.1	Corynebacterium diphtheriae PW8, complete genome
NC_016790.1	Corynebacterium diphtheriae VA01, complete genome
CP006764.1	Corynebacterium doosanense CAU 212 = DSM 45436, complete genome
NC_004369.1	Corynebacterium efficiens YS-314 DNA, complete genome
CP007156.1	Corynebacterium falsenii DSM 44353 strain BL 8171, complete genome
NC_003450.3	Corynebacterium glutamicum ATCC 13032 chromosome, complete genome
NC_006958.1	Corynebacterium glutamicum ATCC 13032, IS fingerprint type 4-5, complete genome
NC_020519.1	Corynebacterium glutamicum K051 complete genome, strain ATCC 13032, sub-strain K051
NC_022040.1	Corynebacterium glutamicum MB001, complete genome
NC_021351.1	Corynebacterium glutamicum SCgG1, complete genome
NC_021352.1	Corynebacterium glutamicum SCgG2, complete genome
CP007724.1	Corynebacterium glutamicum strain AR1, complete genome
CP007722.1	Corynebacterium glutamicum strain ATCC 21831, complete genome
CP010451.1	Corynebacterium glutamicum strain B253, complete genome
CP006842.1	Corynebacterium glyciniphilum AJ 3170, complete genome
NC_020302.1	Corynebacterium halotolerans YIM 70093 = DSM 44683, complete genome
CP005286.1	Corynebacterium humireducens NBRC 106098 = DSM 45392, complete genome
CP009211.1	Corynebacterium imitans strain DSM 44264, complete genome
NC_007164.1	Corynebacterium jeikeium K411 complete genome
NC_012704.1	Corynebacterium kroppenstedtii DSM 44385, complete genome
CP011312.1	Corynebacterium kutscheri strain DSM 20755, complete genome
CP007790.1	Corynebacterium marinum DSM 44953, complete genome
NC_021915.1	Corynebacterium maris DSM 45190, complete genome
NC_017308.1	Corynebacterium pseudotuberculosis 1/06-A, complete genome
NC_017300.1	Corynebacterium pseudotuberculosis 1002, complete genome
NC_017945.2	Corynebacterium pseudotuberculosis 258, complete genome
NC_017462.1	Corynebacterium pseudotuberculosis 267, complete genome
NC_016781.1	Corynebacterium pseudotuberculosis 3/99-5, complete genome
NC_017730.3	Corynebacterium pseudotuberculosis 31, complete genome
NC_016932.1	Corynebacterium pseudotuberculosis 316, complete genome
NC_017306.1	Corynebacterium pseudotuberculosis 42/02-A, complete genome
NC_017301.1	Corynebacterium pseudotuberculosis C231, complete genome
NC_017307.2	Corynebacterium pseudotuberculosis CIP 52.97, complete genome
NC_018019.2	Corynebacterium pseudotuberculosis Cp162, complete genome
NC_014329.1	Corynebacterium pseudotuberculosis FRC41, complete genome
NC_017303.2	Corynebacterium pseudotuberculosis I19, complete genome
NC_017031.1	Corynebacterium pseudotuberculosis P54B96, complete genome
NC_017305.1	Corynebacterium pseudotuberculosis PAT10, complete genome
CP010889.1	Corynebacterium pseudotuberculosis strain 226, complete genome
CP008922.1	Corynebacterium pseudotuberculosis strain 48252, complete genome
CP008924.1	Corynebacterium pseudotuberculosis strain Ft_2193/67, complete genome
CP009927.1	Corynebacterium pseudotuberculosis strain VD57, complete genome
NC_015673.1	Corynebacterium resistens DSM 45100, complete genome
CP010827.1	Corynebacterium singulare strain IBS B52218, complete genome
CP008913.1	Corynebacterium sp. ATCC 6931, complete genome
NC_021663.1	Corynebacterium terpenotabidum Y-11, complete genome
NC_018101.1	Corynebacterium ulcerans 0102 DNA, complete genome
NC_017317.1	Corynebacterium ulcerans 809, complete genome
NC_015683.1	Corynebacterium ulcerans BR-AD22, complete genome
CP009716.1	Corynebacterium ulcerans strain 05146, complete genome
CP011095.1	Corynebacterium ulcerans strain 131002, complete genome
CP009583.1	Corynebacterium ulcerans strain 210931, complete genome
CP009500.1	Corynebacterium ulcerans strain 210932, complete genome
NC_010545.1	Corynebacterium urealyticum DSM 7109 complete genome
NC_020230.1	Corynebacterium urealyticum DSM 7111, complete genome
CP009215.1	Corynebacterium ureicelerivorans strain IMMIB RIV-2301, complete genome
NC_015859.1	Corynebacterium variabile DSM 44702, complete genome
CP004353.1	Corynebacterium vitaeruminis DSM 20294, complete genome
HG825990.3	Coxiella burnetii Cb175_Guyana complete genome
NC_011527.1	Coxiella burnetii CbuG_Q212, complete genome
NC_011528.1	Coxiella burnetii CbuK_Q154, complete genome
NC_009727.1	Coxiella burnetii Dugway 5J108-111, complete genome
NC_010117.1	Coxiella burnetii RSA 331, complete genome
NC_002971.4	Coxiella burnetii RSA 493, complete genome
LK937696.1	Coxiella burnetii Z3055 complete genome
CP007541.1	Coxiella endosymbiont of Amblyomma americanum, complete genome
NC_019753.1	Crinalium epipsammum PCC 9333, complete genome
NC_014230.1	Croceibacter atlanticus HTCC2559, complete genome
NC_023032.1	Cronobacter malonaticus, complete genome
NC_009778.1	Cronobacter sakazakii ATCC BAA-894, complete genome
NC_017933.1	Cronobacter sakazakii ES15, complete genome
NC_020260.1	Cronobacter sakazakii SP291, complete genome
CP011047.1	Cronobacter sakazakii strain ATCC 29544, complete genome
NC_013282.2	Cronobacter turicensis z3032 complete genome
NC_013170.1	Cryptobacterium curtum DSM 15641, complete genome
CP000353.2	Cupriavidus metallidurans CH34 megaplasmid, complete sequence
NC_007973.1	Cupriavidus metallidurans CH34, complete genome
CP002877.1	Cupriavidus necator N-1 chromosome 1, complete sequence
CP002878.1	Cupriavidus necator N-1 chromosome 2, complete sequence
CU633749.1	Cupriavidus taiwanensis str. LMG19424 chromosome 1, complete genome
CU633750.1	Cupriavidus taiwanensis str. LMG19424 chromosome 2, complete genome
NC_021064.1	Cutibacterium avidum 44067, complete genome
NC_019776.1	Cyanobacterium aponinum PCC 10605, complete genome
AP012549.1	Cyanobacterium endosymbiont of Epithemia turgida isolate EtSB Lake Yunoko DNA, complete genome
CP003940.1	Cyanobacterium stanieri PCC 7202, complete genome
NC_019675.1	Cyanobium gracile PCC 6307, complete genome
CP000806.1	Cyanothece sp. ATCC 51142 circular chromosome, complete sequence
NC_011729.1	Cyanothece sp. PCC 7424, complete genome
NC_011884.1	Cyanothece sp. PCC 7425, complete genome
NC_014501.1	Cyanothece sp. PCC 7822, complete genome
NC_011726.1	Cyanothece sp. PCC 8801, complete genome
NC_013161.1	Cyanothece sp. PCC 8802, complete genome
NC_015914.1	Cyclobacterium marinum DSM 745, complete genome
NC_018697.1	Cycloclasticus sp. P1, complete genome
NC_021917.1	Cycloclasticus zancles 78-ME, complete genome
NC_019757.1	Cylindrospermum stagnale PCC 7417, complete genome
NC_008255.1	Cytophaga hutchinsonii ATCC 33406, complete genome
NC_019780.1	Dactylococcopsis salina PCC 8305, complete genome
NC_007298.1	Dechloromonas aromatica RCB, complete genome
NC_016616.1	Dechlorosoma suillum PS, complete genome
NC_013939.1	Deferribacter desulfuricans SSM1 DNA, complete genome
CP007033.1	Dehalobacter restrictus DSM 9455, complete genome
NC_018867.1	Dehalobacter sp. CF, complete genome
NC_018866.1	Dehalobacter sp. DCA, complete genome
NC_002936.3	Dehalococcoides mccartyi 195, complete genome
NC_009455.1	Dehalococcoides mccartyi BAV1, complete genome
NC_020387.1	Dehalococcoides mccartyi BTF08, complete genome
CP006949.1	Dehalococcoides mccartyi CG1, complete genome
CP006950.1	Dehalococcoides mccartyi CG4, complete genome
CP006951.1	Dehalococcoides mccartyi CG5, complete genome
NC_020386.1	Dehalococcoides mccartyi DCMB5, complete genome
NC_013890.1	Dehalococcoides mccartyi GT, complete genome
NC_022964.1	Dehalococcoides mccartyi GY50, complete genome
NC_013552.1	Dehalococcoides mccartyi VS, complete genome
NC_007356.1	Dehalococcoides sp. CBDB1 complete genome
AP014722.1	Dehalococcoides sp. UCH007 DNA, complete genome
NC_014314.1	Dehalogenimonas lykanthroporepellens BL-DC-9, complete genome
NC_012526.1	Deinococcus deserti VCD115, complete genome
NC_008025.1	Deinococcus geothermalis DSM 11300, complete genome
NC_014958.1	Deinococcus maricopensis DSM 21211, complete genome
NC_019793.1	Deinococcus peraridilitoris DSM 19664, complete genome
NC_015161.1	Deinococcus proteolyticus MRP, complete genome
CP010028.1	Deinococcus swuensis strain DY59, complete genome
NC_010002.1	Delftia acidovorans SPH-1, complete genome
NC_015563.1	Delftia sp. Cs1-4, complete genome
NC_013943.1	Denitrovibrio acetiphilus DSM 12809, complete genome
CP008889.1	Dermacoccus nishinomiyaensis strain M25, complete genome
NC_014365.1	Desulfarculus baarsii DSM 2075, complete genome
NC_011768.1	Desulfatibacillum alkenivorans AK-01, complete genome
NC_018017.1	Desulfitobacterium dehalogenans ATCC 51507, complete genome
NC_019903.1	Desulfitobacterium dichloroeliminans LMG P-21439, complete genome
NC_011830.1	Desulfitobacterium hafniense DCB-2, complete genome
NC_007907.1	Desulfitobacterium hafniense Y51 DNA, complete genome
CP007032.1	Desulfitobacterium metallireducens DSM 15288, complete genome
NC_015388.1	Desulfobacca acetoxidans DSM 11109, complete genome
NC_012108.1	Desulfobacterium autotrophicum HRM2, complete genome
NC_018645.1	Desulfobacula toluolica Tol2 complete genome
NC_014972.1	Desulfobulbus propionicus DSM 2032, complete genome
NC_020304.1	Desulfocapsa sulfexigens DSM 10523, complete genome
NC_009943.1	Desulfococcus oleovorans Hxd3, complete genome
NC_013223.1	Desulfohalobium retbaense DSM 5692, complete genome
NC_013173.1	Desulfomicrobium baculatum DSM 4028, complete genome
NC_018025.1	Desulfomonile tiedjei DSM 6799, complete genome
NC_018068.1	Desulfosporosinus acidiphilus SJ4, complete genome
NC_018515.1	Desulfosporosinus meridiei DSM 13257, complete genome
NC_016584.1	Desulfosporosinus orientis DSM 765, complete genome
NC_006138.1	Desulfotalea psychrophila LSv54 chromosome
NC_013216.1	Desulfotomaculum acetoxidans DSM 771, complete genome
NC_021184.1	Desulfotomaculum gibsoniae DSM 7213, complete genome
CP002770.1	Desulfotomaculum kuznetsovii DSM 6115, complete genome
NC_015565.1	Desulfotomaculum nigrificans CO-1-SRB, complete genome
NC_009253.1	Desulfotomaculum reducens MI-1, complete genome
NC_015589.1	Desulfotomaculum ruminis DSM 2154, complete genome
NC_014844.1	Desulfovibrio aespoeensis Aspo-2, complete genome
NC_016629.1	Desulfovibrio africanus str. Walvis Bay, complete genome
NC_007519.1	Desulfovibrio alaskensis G20, complete genome
NC_016803.1	Desulfovibrio desulfuricans ND132, complete genome
NC_011883.1	Desulfovibrio desulfuricans subsp. desulfuricans str. ATCC 27774, complete genome
NC_012796.1	Desulfovibrio magneticus RS-1 DNA, complete genome
NC_012881.1	Desulfovibrio salexigens DSM 2638, complete genome
NC_008751.1	Desulfovibrio vulgaris DP4, complete genome
NC_017310.1	Desulfovibrio vulgaris RCH1, complete genome
NC_002937.3	Desulfovibrio vulgaris str. Hildenborough chromosome, complete genome
NC_011769.1	Desulfovibrio vulgaris str. 'Miyazaki F', complete genome
NC_014836.1	Desulfurispirillum indicum S5, complete genome
NC_014216.1	Desulfurivibrio alkaliphilus AHT2, complete genome
NC_015185.1	Desulfurobacterium thermolithotrophum DSM 11699, complete genome
NC_018001.1	Desulfurococcus fermentans DSM 16532, complete genome
NC_011766.1	Desulfurococcus kamchatkensis 1221n, complete genome
NC_014961.1	Desulfurococcus mucosus DSM 2162, complete genome
NC_009446.1	Dichelobacter nodosus VCS1703A, complete genome
CP001655.1	Dickeya chrysanthemi Ech1591 chromosome, complete genome
CP001654.1	Dickeya paradisiaca Ech703 chromosome, complete genome
CP009460.1	Dickeya solani strain ND14b chromosome, complete genome
CP006929.1	Dickeya zeae EC1, complete genome
NC_013592.1	Dickeya zeae Ech586, complete genome
NC_011297.1	Dictyoglomus thermophilum H-6-12, complete genome
NC_011661.1	Dictyoglomus turgidum DSM 6724 chromosome, complete genome
NC_009952.1	Dinoroseobacter shibae DFL 12, complete genome
NC_015496.1	Dokdonia sp. 4H-3-7-5, complete genome
CP009301.1	Dokdonia sp. MED134, complete genome
CP007451.1	Draconibacterium orientale strain FH5T, complete genome
NC_013037.1	Dyadobacter fermentans DSM 18053, complete genome
CP008884.1	Dyella japonica A8, complete genome
CP007444.1	Dyella jiangningensis strain SBZ 3-12, complete genome
NC_019904.1	Echinicola vietnamensis DSM 17526, complete genome
NC_012779.2	Edwardsiella ictaluri 93-146, complete genome
NC_020796.1	Edwardsiella piscicida C07-087, complete genome
NC_013508.1	Edwardsiella tarda EIB202, complete genome
NC_017309.1	Edwardsiella tarda FL6-60, complete genome
NC_013204.1	Eggerthella lenta DSM 2243, complete genome
NC_015738.1	Eggerthella sp. YY7918 DNA, complete genome
NC_007354.1	Ehrlichia canis str. Jake, complete genome
NC_007799.1	Ehrlichia chaffeensis str. Arkansas, complete genome
CP007473.1	Ehrlichia chaffeensis str. Heartland, complete genome
CP007475.1	Ehrlichia chaffeensis str. Jax, complete genome
CP007476.1	Ehrlichia chaffeensis str. Liberty, complete genome
CP007477.1	Ehrlichia chaffeensis str. Osceola, complete genome
CP007478.1	Ehrlichia chaffeensis str. Saint Vincent, complete genome
CP007479.1	Ehrlichia chaffeensis str. Wakulla, complete genome
CP007480.1	Ehrlichia chaffeensis str. West Paces, complete genome
CP006917.1	Ehrlichia muris AS145, complete genome
NC_023063.1	Ehrlichia muris AS145, complete genome
CR925677.1	Ehrlichia ruminantium str. Gardel, complete genome
NC_006831.1	Ehrlichia ruminantium str. Gardel, complete genome
CR925678.1	Ehrlichia ruminantium str. Welgevonden, complete genome
NC_006832.1	Ehrlichia ruminantium str. Welgevonden, complete genome
CR767821.1	Ehrlichia ruminantium strain Welgevonden, complete genome
NC_005295.2	Ehrlichia ruminantium strain Welgevonden, complete genome
CP007474.1	Ehrlichia sp. HF, complete genome
NC_010644.1	Elusimicrobium minutum Pei191, complete genome
CP002961.1	Emticicia oligotrophica DSM 17448, complete genome
CP004403.1	Endosymbiont of Acanthamoeba sp. UWC8 chromosome, complete genome
AP012978.1	Endosymbiont of unidentified scaly snail isolate Monju DNA, complete genome
NC_020181.1	Enterobacter aerogenes EA1509E complete genome
CP007546.1	Enterobacter asburiae L1, complete genome
NC_015968.1	Enterobacter asburiae LF7a, complete genome
CP008823.1	Enterobacter cloacae ECNIH2, complete genome
CP008897.1	Enterobacter cloacae ECNIH3, complete genome
CP008905.1	Enterobacter cloacae ECR091, complete genome
NC_016514.1	Enterobacter cloacae EcWSU1, complete genome
CP006580.1	Enterobacter cloacae P101, complete genome
CP009756.1	Enterobacter cloacae strain GGT036, complete genome
NC_018405.1	Enterobacter cloacae subsp. cloacae ENHKU01, complete genome
NC_018079.1	Enterobacter cloacae subsp. dissolvens SDM, complete genome
CP010377.1	Enterobacter hormaechei subsp. hormaechei strain 34983, complete genome
CP010384.1	Enterobacter hormaechei subsp. oharae strain 34399, complete genome
NC_014618.1	Enterobacter lignolyticus SCF1, complete genome
NC_009436.1	Enterobacter sp. 638, complete genome
NC_021500.1	Enterobacter sp. R4-368, complete genome
CP004083.1	Enterobacteriaceae bacterium bta3-1, complete genome
NC_020063.1	Enterobacteriaceae bacterium strain FGI 57, complete genome
CP004856.1	Enterococcus casseliflavus EC20, complete genome
NC_020995.1	Enterococcus casseliflavus EC20, complete genome
CP002491.1	Enterococcus faecalis 62, complete genome
NC_018221.1	Enterococcus faecalis D32, complete genome
CP004081.1	Enterococcus faecalis DENG1, complete genome
NC_017316.1	Enterococcus faecalis OG1RF, complete genome
HF558530.1	Enterococcus faecalis str. Symbioflor 1, complete genome
NC_019770.1	Enterococcus faecalis str. Symbioflor 1, complete genome
NC_004668.1	Enterococcus faecalis V583 chromosome, complete genome
NC_017022.1	Enterococcus faecium Aus0004, complete genome
NC_021994.1	Enterococcus faecium Aus0085, complete genome
NC_017960.1	Enterococcus faecium DO chromosome, complete genome
NC_020207.1	Enterococcus faecium NRRL B-2354, complete genome
CP006030.1	Enterococcus faecium T110, complete genome
NC_018081.1	Enterococcus hirae ATCC 9790, complete genome
NC_022878.1	Enterococcus mundtii QU 25 DNA, complete genome
NC_013971.1	Erwinia amylovora ATCC 49946 chromosomal sequence
NC_013961.1	Erwinia amylovora CFBP1430 complete genome
NC_014306.1	Erwinia billingiae strain Eb661 complete chromosome
NC_004547.2	Erwinia carotovora subsp. atroseptica SCRI1043, complete genome
NC_012214.1	Erwinia pyrifoliae strain Ep1/96 complete chromosome
NC_017445.1	Erwinia sp. Ejp617, complete genome
NC_010694.1	Erwinia tasmaniensis strain ET1/99 complete chromosome
NC_015601.1	Erysipelothrix rhusiopathiae str. Fujisawa DNA, complete genome
NC_021354.1	Erysipelothrix rhusiopathiae SY1027, complete genome
NC_007722.1	Erythrobacter litoralis HTCC2594, complete genome
CP007025.1	Escherichia albertii KF1, complete genome
NC_011601.1	Escherichia coli 0127:H6 E2348/69 complete genome, strain E2348/69
NC_017626.1	Escherichia coli 042 complete genome
CP009166.1	Escherichia coli 1303, complete genome
NC_008253.1	Escherichia coli 536, complete genome
NC_011748.1	Escherichia coli 55989 chromosome, complete genome
NC_017631.1	Escherichia coli ABU 83972, complete genome
CP005930.1	Escherichia coli APEC IMT5155, complete genome
NC_020163.1	Escherichia coli APEC O78, complete genome
NC_010468.1	Escherichia coli ATCC 8739, complete genome
NC_012967.1	Escherichia coli B str. REL606, complete genome
CP005998.1	Escherichia coli B7A, complete genome
NC_012892.2	Escherichia coli BL21(DE3), complete genome
NC_012971.2	Escherichia coli BL21(DE3), complete genome
NC_012947.1	Escherichia coli 'BL21-Gold(DE3)pLysS AG', complete genome
CP009273.1	Escherichia coli BW25113, complete genome
NC_012759.1	Escherichia coli BW2952, complete genome
NC_017638.1	Escherichia coli DH1 (ME8569) DNA, complete genome
NC_017625.1	Escherichia coli DH1, complete genome
NC_009801.1	Escherichia coli E24377A, complete genome
CP010344.1	Escherichia coli ECC-1470, complete genome
CP009644.1	Escherichia coli ER2796, complete genome
NC_017633.1	Escherichia coli ETEC H10407, complete genome
LM993812.1	Escherichia coli genome assembly EcHMS174Chr, chromosome : 1
LM995446.1	Escherichia coli genome assembly EcRV308Chr, chromosome : 1
NC_009800.1	Escherichia coli HS, complete genome
HF572917.2	Escherichia coli HUSEC2011 complete genome
NC_011741.1	Escherichia coli IAI1 chromosome, complete genome
NC_011750.1	Escherichia coli IAI39 chromosome, complete genome
NC_017628.1	Escherichia coli IHE3034, complete genome
NC_022648.1	Escherichia coli JJ1886, complete genome
CP009789.1	Escherichia coli K-12 strain ER3413, complete genome
CP010445.1	Escherichia coli K-12 strain ER3435, complete genome
CP010439.1	Escherichia coli K-12 strain ER3440, complete genome
CP010441.1	Escherichia coli K-12 strain ER3445, complete genome
CP010443.1	Escherichia coli K-12 strain ER3446, complete genome
CP010438.1	Escherichia coli K-12 strain ER3454, complete genome
CP010442.1	Escherichia coli K-12 strain ER3466, complete genome
CP010444.1	Escherichia coli K-12 strain ER3475, complete genome
CP010440.1	Escherichia coli K-12 strain ER3476, complete genome
CP008801.1	Escherichia coli KLY, complete genome
NC_016902.1	Escherichia coli KO11, complete genome
NC_017660.1	Escherichia coli KO11FL, complete genome
NC_011993.1	Escherichia coli LF82 chromosome, complete sequence
NC_022364.1	Escherichia coli LY180, complete genome
CP002797.2	Escherichia coli NA114, complete genome
NC_013353.1	Escherichia coli O103:H2 str. 12009 DNA, complete genome
NC_018650.1	Escherichia coli O104:H4 str. 2009EL-2050, complete genome
NC_018661.1	Escherichia coli O104:H4 str. 2009EL-2071, complete genome
NC_018658.1	Escherichia coli O104:H4 str. 2011C-3493 chromosome, complete genome
CP011331.1	Escherichia coli O104:H4 str. C227-11, complete genome
NC_013364.1	Escherichia coli O111:H- str. 11128 DNA, complete genome
CP007136.1	Escherichia coli O145:H28 str. RM12581, complete genome
CP007133.1	Escherichia coli O145:H28 str. RM12761, complete genome
CP006027.1	Escherichia coli O145:H28 str. RM13514, complete genome
CP006262.1	Escherichia coli O145:H28 str. RM13516, complete genome
CP007592.1	Escherichia coli O157:H16 strain Santai, complete genome
NC_011353.1	Escherichia coli O157:H7 str. EC4115, complete genome
CP008957.1	Escherichia coli O157:H7 str. EDL933, complete genome
NC_002695.1	Escherichia coli O157:H7 str. Sakai, complete genome
CP008805.1	Escherichia coli O157:H7 str. SS17, complete genome
NC_013008.1	Escherichia coli O157:H7 str. TW14359, complete genome
NC_013361.1	Escherichia coli O26:H11 str. 11368 DNA, complete genome
NC_013941.1	Escherichia coli O55:H7 str. CB9615, complete genome
NC_017656.1	Escherichia coli O55:H7 str. RM12579, complete genome
NC_017646.1	Escherichia coli O7:K1 str. CE10, complete genome
NC_017634.1	Escherichia coli O83:H1 str. NRG 857C chromosome, complete genome
NC_017663.1	Escherichia coli P12b, complete genome
NC_022370.1	Escherichia coli PMV-1 main chromosome, complete genome
NC_011742.1	Escherichia coli S88 chromosome, complete genome
NC_011415.1	Escherichia coli SE11 DNA, complete genome
NC_013654.1	Escherichia coli SE15 DNA, complete genome
NC_010498.1	Escherichia coli SMS-3-5, complete genome
HG941718.1	Escherichia coli ST131 strain EC958 chromosome, complete genome
NC_017652.1	Escherichia coli str. 'clone D i14', complete genome
NC_017651.1	Escherichia coli str. 'clone D i2', complete genome
NC_010473.1	Escherichia coli str. K12 substr. DH10B, complete genome
HG738867.1	Escherichia coli str. K-12 substr. MC4100 complete genome
NC_020518.1	Escherichia coli str. K-12 substr. MDS42 DNA, complete genome
NC_000913.3	Escherichia coli str. K-12 substr. MG1655, complete genome
NC_007779.1	Escherichia coli str. K-12 substr. W3110 DNA, complete genome
CP010371.1	Escherichia coli strain 6409, complete genome
CP010315.1	Escherichia coli strain 789, complete genome
CP010816.1	Escherichia coli strain BL21 (TaKaRa), complete genome
CP010585.1	Escherichia coli strain C41(DE3), complete genome
CP011018.1	Escherichia coli strain CI5, complete genome
CP007392.1	Escherichia coli strain ST2747, complete genome
CP007265.1	Escherichia coli strain ST540, complete genome
CP007390.1	Escherichia coli strain ST540, complete genome
NC_011751.1	Escherichia coli UMN026, complete genome
NC_017641.1	Escherichia coli UMNK88, complete genome
NC_007946.1	Escherichia coli UTI89, complete genome
CP011134.1	Escherichia coli VR50, complete genome
NC_017664.1	Escherichia coli W, complete genome
NC_011740.1	Escherichia fergusonii ATCC 35469 chromosome, complete genome
NC_014828.1	Ethanoligenens harbinense YUAN-3, complete genome
NC_012778.1	Eubacterium eligens ATCC 27750, complete genome
NC_014624.2	Eubacterium limosum KIST612, complete genome
NC_012781.1	Eubacterium rectale ATCC 33656, complete genome
NC_018665.1	Exiguobacterium antarcticum B7, complete genome
NC_010556.1	Exiguobacterium sibiricum 255-15, complete genome
NC_012673.1	Exiguobacterium sp. AT1b, complete genome
NC_022794.1	Exiguobacterium sp. MH3, complete genome
NC_014541.1	Ferrimonas balearica DSM 9799, complete genome
NC_013849.1	Ferroglobus placidus DSM 10642, complete genome
NC_009718.1	Fervidobacterium nodosum Rt17-B1, complete genome
NC_017095.1	Fervidobacterium pennivorans DSM 9078, complete genome
NC_013410.1	Fibrobacter succinogenes subsp. succinogenes S85, complete genome
NC_017448.1	Fibrobacter succinogenes subsp. succinogenes S85, complete genome
NC_016630.1	Filifactor alocis ATCC 35896, complete genome
CP007139.1	Fimbriimonas ginsengisoli Gsoil 348, complete genome
NC_010376.1	Finegoldia magna ATCC 29328 DNA, complete genome
NC_013062.1	Flavobacteriaceae bacterium 3519-10, complete genome
FQ859183.1	Flavobacterium branchiophilum FL-15, complete genome
NC_016001.1	Flavobacterium branchiophilum FL-15, complete genome
NC_016510.2	Flavobacterium columnare ATCC 49512, complete genome
HE774682.1	Flavobacterium indicum GPTSA100-9 complete genome
NC_009441.1	Flavobacterium johnsoniae UW101, complete genome
CP007206.1	Flavobacterium psychrophilum FPG101, complete genome
CP007207.1	Flavobacterium psychrophilum FPG3, complete genome
NC_009613.3	Flavobacterium psychrophilum JIP02/86 complete genome
CP008902.1	Flavobacterium psychrophilum strain 950106-1/1, complete genome
CP007627.1	Flavobacterium psychrophilum strain CSF259-93, complete genome
CP008878.1	Flavobacterium psychrophilum strain V3-5, complete genome
CP008881.1	Flavobacterium psychrophilum strain V4-24, complete genome
CP008883.1	Flavobacterium psychrophilum strain v4-33, complete genome
NC_015672.1	Flexistipes sinusarabici DSM 4947, complete genome
NC_015321.1	Fluviicola taffensis DSM 16823, complete genome
NC_017449.1	Francisella cf. novicida 3523, complete genome
NC_017450.1	Francisella cf. novicida Fx1, complete genome
NC_017909.1	Francisella noatunensis subsp. orientalis str. Toba 04, complete genome
CP009440.1	Francisella philomiragia strain GA01-2794, complete genome
CP009444.1	Francisella philomiragia strain GA01-2801, complete genome
CP009442.1	Francisella philomiragia strain O#319-036 [FSC 153], complete genome
CP009436.1	Francisella philomiragia strain O#319-067, complete genome
CP010019.1	Francisella philomiragia subsp. philomiragia ATCC 25015 strain O#319L, complete genome
NC_010336.1	Francisella philomiragia subsp. philomiragia ATCC 25017, complete genome
CP009574.1	Francisella sp. FSC1006, complete genome
NC_015696.1	Francisella sp. TX077308, complete genome
NC_019537.1	Francisella tularensis subsp. holarctica F92, complete genome
NC_019551.1	Francisella tularensis subsp. holarctica FSC200, complete genome
NC_009749.1	Francisella tularensis subsp. holarctica FTNF002-00, complete genome
NC_007880.1	Francisella tularensis subsp. holarctica LVS complete genome
CP009694.1	Francisella tularensis subsp. holarctica LVS, complete genome
NC_008369.1	Francisella tularensis subsp. holarctica OSU18, complete genome
NC_017463.1	Francisella tularensis subsp. holarctica OSU18, complete genome
CP007148.1	Francisella tularensis subsp. holarctica PHIT-FT049, complete genome
CP010289.1	Francisella tularensis subsp. holarctica strain 425, complete genome
CP009693.1	Francisella tularensis subsp. holarctica strain FTT_1, complete genome
CP010288.1	Francisella tularensis subsp. holarctica strain VT68, complete genome
NC_010677.1	Francisella tularensis subsp. mediasiatica FSC147, complete genome
CP009607.1	Francisella tularensis subsp. novicida D9876, complete genome
CP009353.1	Francisella tularensis subsp. novicida F6168, complete genome
CP010103.1	Francisella tularensis subsp. novicida strain DPG 3A-IS, complete genome
CP009633.1	Francisella tularensis subsp. novicida U112, complete genome
NC_008601.1	Francisella tularensis subsp. novicida U112, complete genome
NC_017453.1	Francisella tularensis subsp. tularensis NE061598, complete genome
NC_006570.2	Francisella tularensis subsp. tularensis SCHU S4 chromosome, complete genome
CP010290.1	Francisella tularensis subsp. tularensis SCHU S4, complete genome
NC_008245.1	Francisella tularensis subsp. tularensis strain FSC 198 complete genome
CP010115.1	Francisella tularensis subsp. tularensis strain NIH B-38, complete genome
NC_009257.1	Francisella tularensis subsp. tularensis WY96-3418, complete genome
NC_016937.1	Francisella tularensis TI0902, complete genome
NC_016933.1	Francisella tularensis TIGB03, complete genome
NC_008278.1	Frankia alni str. ACN14A chromosome, complete sequence
NC_007777.1	Frankia casuarinae, complete genome
NC_014666.1	Frankia inefficax, complete genome
NC_009921.1	Frankia sp. EAN1pec, complete genome
NC_015656.1	Frankia symbiont of Datisca glomerata, complete genome
NC_017033.1	Frateuria aurantia DSM 6220, complete genome
CP009056.1	Frischella perrara strain PEB0191, complete genome
CP007062.1	Fusobacterium nucleatum subsp. animalis 7_1, complete genome
NC_022196.1	Fusobacterium nucleatum subsp. vincentii 3_1_36A2, complete genome
NC_021281.1	Fusobacterium sp. 4_8, complete genome
NC_015460.1	Gallibacterium anatis UMN179, complete genome
NC_014394.1	Gallionella capsiferriformans ES-2, complete genome
NC_014366.1	gamma proteobacterium HdN1 complete genome
NC_013721.1	Gardnerella vaginalis 409-05, complete genome
AP012332.1	Gardnerella vaginalis ATCC 14018 = JCM 11026 DNA, complete genome
NC_014644.1	Gardnerella vaginalis ATCC 14019 chromosome, complete genome
NC_017456.1	Gardnerella vaginalis HMP9231, complete genome
NC_019703.1	Geitlerinema sp. PCC 7407, complete genome
AP014815.1	Geminocystis sp. NIES-3708 DNA, complete genome
AP014821.1	Geminocystis sp. NIES-3709 DNA, complete genome
NC_012489.1	Gemmatimonas aurantiaca T-27 DNA, complete genome
CP007128.1	Gemmatirosa kalamazoonesis strain KBS708, complete genome
CP010311.1	Geoalkalibacter subterraneus strain Red1, complete genome
NC_022080.4	Geobacillus genomosp. 3 strain JF8, complete genome
NC_006510.1	Geobacillus kaustophilus HTA426 DNA, complete genome
NC_014206.1	Geobacillus sp. C56-T3, complete genome
NC_020210.1	Geobacillus sp. GHH01, complete genome
NC_012793.1	Geobacillus sp. WCH70, complete genome
NC_014650.1	Geobacillus sp. Y4.1MC1, complete genome
NC_014915.1	Geobacillus sp. Y412MC52, complete genome
NC_013411.1	Geobacillus sp. Y412MC61, complete genome
NC_009328.1	Geobacillus thermodenitrificans NG80-2, complete genome
NC_016593.1	Geobacillus thermoleovorans CCB_US3_UF5, complete genome
NC_011146.1	Geobacter bemidjiensis Bem, complete genome
NC_011979.1	Geobacter daltonii FRC-32, complete genome
NC_010814.1	Geobacter lovleyi SZ, complete genome
NC_007517.1	Geobacter metallireducens GS-15, complete genome
CP009788.1	Geobacter pickeringii strain G13, complete genome
NC_014973.1	Geobacter sp. M18, complete genome
NC_012918.1	Geobacter sp. M21, complete genome
NC_017454.1	Geobacter sulfurreducens KN400, complete genome
NC_002939.5	Geobacter sulfurreducens PCA chromosome, complete genome
NC_009483.1	Geobacter uraniireducens Rf4, complete genome
NC_013757.1	Geodermatophilus obscurus DSM 43160, complete genome
CP007445.1	Gilliamella apicola strain wkB1, complete genome
NC_016041.1	Glaciecola nitratireducens FR1064, complete genome
NC_015497.1	Glaciecola sp. 4H-3-7+YE-5, complete genome
CP009237.1	Glaesserella parasuis strain KL0318 chromosome, complete genome
CP009158.1	Glaesserella parasuis strain SH03 chromosome, complete genome
NC_022600.1	Gloeobacter kilaueensis JS1, complete genome
NC_005125.1	Gloeobacter violaceus PCC 7421 chromosome, complete genome
NC_019745.1	Gloeocapsa sp. PCC 7428, complete genome
NC_010125.1	Gluconacetobacter diazotrophicus PAl 5 complete genome
NC_011365.1	Gluconacetobacter diazotrophicus PAl 5, complete genome
NC_006677.1	Gluconobacter oxydans 621H, complete genome
CP004373.1	Gluconobacter oxydans DSM 3504, complete genome
NC_019396.1	Gluconobacter oxydans H24, complete genome
NC_013441.1	Gordonia bronchialis DSM 43247, complete genome
NC_016906.1	Gordonia polyisoprenivorans VH2, complete genome
NC_018581.1	Gordonia sp. KTR9, complete genome
NC_018664.1	Gottschalkia acidurici 9a, complete genome
NC_008571.1	Gramella forsetii KT0803 complete circular genome
NC_016631.1	Granulicella mallensis MP5ACTX8, complete genome
NC_015064.1	Granulicella tundricola MP5ACTX9, complete genome
CP007142.1	Gynuella sunshinyii YC6258, complete genome
NC_002940.2	Haemophilus ducreyi strain 35000HP complete genome
NC_016809.1	Haemophilus influenzae 10810 genome
CP008740.1	Haemophilus influenzae 2019, complete genome
NC_007146.2	Haemophilus influenzae 86-028NP, complete genome
CP007805.1	Haemophilus influenzae CGSHiCZ412602, complete genome
NC_014920.1	Haemophilus influenzae F3031 complete genome
FQ670204.1	Haemophilus influenzae F3047 complete genome
NC_014922.1	Haemophilus influenzae F3047 complete genome
NC_022356.1	Haemophilus influenzae KR494, complete genome
NC_017452.1	Haemophilus influenzae R2846, complete genome
NC_017451.1	Haemophilus influenzae R2866, complete genome
CP009610.1	Haemophilus influenzae strain Hi375, complete genome
NC_015964.1	Haemophilus parainfluenzae T3T1 complete genome
NC_011852.1	Haemophilus parasuis SH0165, complete genome
CP005384.1	Haemophilus parasuis ZJ0906, complete genome
NC_008309.1	Haemophilus somnus 129PT, complete genome
NC_010519.1	Haemophilus somnus 2336, complete genome
CP009706.1	Hafnia alvei FB1, complete genome
NC_007645.1	Hahella chejuensis KCTC 2396, complete genome
NC_014297.1	Halalkalicoccus jeotgali B3, complete genome
NC_014654.1	Halanaerobium hydrogeniformans, complete genome
NC_017455.1	Halanaerobium praevalens DSM 2228, complete genome
NC_013440.1	Haliangium ochraceum DSM 14365, complete genome
NC_015510.1	Haliscomenobacter hydrossis DSM 1100, complete genome
NC_017668.1	Halobacillus halophilus DSM 2266 complete genome
NC_010364.1	Halobacterium salinarum R1 complete genome
NC_002607.1	Halobacterium sp. NRC-1, complete genome
NC_019978.1	Halobacteroides halobius DSM 5150, complete genome
NC_017941.2	Haloferax mediterranei ATCC 33500, complete genome
NC_013967.1	Haloferax volcanii DS2, complete genome
NC_014729.1	Halogeometricum borinquense DSM 11551, complete genome
NC_013202.1	Halomicrobium mukohataei DSM 12286, complete genome
CP007757.1	Halomonas campaniensis strain LS21, complete genome
CP011052.1	Halomonas sp. KO116, complete genome
NC_015954.1	Halophilic archaeon DL31, complete genome
NC_015666.1	Halopiger xanaduensis SH-6, complete genome
NC_017459.1	Haloquadratum walsbyi C23 complete genome
NC_008212.1	Haloquadratum walsbyi DSM 16790 complete genome
NC_013158.1	Halorhabdus utahensis DSM 12940, complete genome
NC_008789.1	Halorhodospira halophila SL1, complete genome
NC_013743.1	Haloterrigena turkmenica DSM 5511, complete genome
NC_019779.1	Halothece sp. PCC 7418, complete genome
NC_011899.1	Halothermothrix orenii H 168, complete genome
NC_013422.1	Halothiobacillus neapolitanus c2, complete genome
NC_008229.1	Helicobacter acinonychis str. Sheeba complete genome, strain Sheeba
NC_017737.1	Helicobacter cetorum MIT 00-7128, complete genome
NC_017735.1	Helicobacter cetorum MIT 99-5656, complete genome
AP012492.1	Helicobacter cinaedi CCUG 18818 = ATCC BAA-847 DNA, complete genome
NC_017761.1	Helicobacter cinaedi PAGU611 DNA, complete genome
NC_004917.1	Helicobacter hepaticus ATCC 51449, complete genome
FN555004.1	Helicobacter mustelae 12198 complete genome
NC_013949.1	Helicobacter mustelae 12198 complete genome
NC_017374.1	Helicobacter pylori 2017, complete genome
NC_017381.1	Helicobacter pylori 2018, complete genome
CP010435.1	Helicobacter pylori 26695-1, complete genome
AP013355.1	Helicobacter pylori 26695-1CH DNA, complete genome
AP013356.1	Helicobacter pylori 26695-1CL DNA, complete genome
NC_017360.1	Helicobacter pylori 35A, complete genome
NC_017382.1	Helicobacter pylori 51, complete genome
NC_017354.1	Helicobacter pylori 52, complete genome
NC_017375.1	Helicobacter pylori 83, complete genome
NC_017357.1	Helicobacter pylori 908, complete genome
NC_019560.1	Helicobacter pylori Aklavik117, complete genome
NC_019563.1	Helicobacter pylori Aklavik86, complete genome
FM991728.1	Helicobacter pylori B38 complete genome, strain B38
NC_012973.1	Helicobacter pylori B38 complete genome, strain B38
FN598874.1	Helicobacter pylori B8 complete genome
NC_014256.1	Helicobacter pylori B8 complete genome
CP006888.1	Helicobacter pylori BM012A, complete genome
NC_022886.1	Helicobacter pylori BM012A, complete genome
CP006889.1	Helicobacter pylori BM012S, complete genome
NC_022911.1	Helicobacter pylori BM012S, complete genome
AP014710.1	Helicobacter pylori DNA, complete genome, strain: ML1
AP014711.1	Helicobacter pylori DNA, complete genome, strain: ML2
AP014712.1	Helicobacter pylori DNA, complete genome, strain: ML3
NC_017063.1	Helicobacter pylori ELS37, complete genome
NC_017368.1	Helicobacter pylori F16 DNA, complete genome
NC_017365.1	Helicobacter pylori F30 DNA, complete genome
NC_017366.1	Helicobacter pylori F32 DNA, complete genome
NC_017367.1	Helicobacter pylori F57 DNA, complete genome
NC_011333.1	Helicobacter pylori G27, complete genome
NC_017371.1	Helicobacter pylori Gambia94/24, complete genome
NC_008086.1	Helicobacter pylori HPAG1, complete genome
NC_017733.1	Helicobacter pylori HUP-B14, complete genome
NC_017372.1	Helicobacter pylori India7, complete genome
CP007603.1	Helicobacter pylori J166, complete genome
CP011330.1	Helicobacter pylori J99, complete genome
NC_000921.1	Helicobacter pylori J99, complete genome
NC_017362.1	Helicobacter pylori Lithuania75, complete genome
AP014523.1	Helicobacter pylori NY40 DNA, complete genome
NC_020508.1	Helicobacter pylori OK113 DNA, complete genome
NC_020509.1	Helicobacter pylori OK310 DNA, complete genome
CP006820.1	Helicobacter pylori oki102, complete genome
CP006821.1	Helicobacter pylori oki112, complete genome
CP006822.1	Helicobacter pylori oki128, complete genome
CP006823.1	Helicobacter pylori oki154, complete genome
CP006824.1	Helicobacter pylori oki422, complete genome
CP006825.1	Helicobacter pylori oki673, complete genome
CP006826.1	Helicobacter pylori oki828, complete genome
CP006827.1	Helicobacter pylori oki898, complete genome
NC_011498.1	Helicobacter pylori P12, complete genome
NC_017742.1	Helicobacter pylori PeCan18, complete genome
NC_014555.1	Helicobacter pylori PeCan4, complete genome
NC_017378.1	Helicobacter pylori Puno120, complete genome
NC_017379.1	Helicobacter pylori Puno135, complete genome
NC_017359.1	Helicobacter pylori Sat464, complete genome
NC_017741.1	Helicobacter pylori Shi112, complete genome
NC_017740.1	Helicobacter pylori Shi169, complete genome
NC_017739.1	Helicobacter pylori Shi417, complete genome
NC_010698.2	Helicobacter pylori Shi470, complete genome
NC_017376.1	Helicobacter pylori SNT49, complete genome
NC_017361.1	Helicobacter pylori SouthAfrica7, complete genome
CP007605.1	Helicobacter pylori strain BM012B, complete genome
CP007604.1	Helicobacter pylori strain BM013A, complete genome
CP007606.1	Helicobacter pylori strain BM013B, complete genome
CP010013.1	Helicobacter pylori strain Hp238, complete genome
CP005490.3	Helicobacter pylori UM032, complete genome
NC_021215.3	Helicobacter pylori UM032, complete genome
CP005492.3	Helicobacter pylori UM037, complete genome
NC_021217.3	Helicobacter pylori UM037, complete genome
CP005493.3	Helicobacter pylori UM066, complete genome
NC_021218.3	Helicobacter pylori UM066, complete genome
CP006610.2	Helicobacter pylori UM298, complete genome
NC_021882.2	Helicobacter pylori UM298, complete genome
CP005491.3	Helicobacter pylori UM299, complete genome
NC_021216.3	Helicobacter pylori UM299, complete genome
NC_017355.1	Helicobacter pylori v225d, complete genome
CP003419.1	Helicobacter pylori XZ274, complete genome
NC_010337.2	Heliobacterium modesticaldum Ice1 strain Ice1, complete genome
NC_014323.1	Herbaspirillum seropedicae SmR1, complete genome
NC_009138.1	Herminiimonas arsenicoxydans chromosome, complete sequence
CP000875.1	Herpetosiphon aurantiacus DSM 785, complete genome
NC_015318.1	Hippea maritima DSM 10411, complete genome
NC_012982.1	Hirschia baltica ATCC 49814, complete genome
NC_015564.1	Hoyosella subflava DQS3-9A1, complete genome
NC_013799.1	Hydrogenobacter thermophilus TK-6 DNA, complete genome
NC_017161.1	Hydrogenobacter thermophilus TK-6, complete genome
NC_015557.1	Hydrogenobaculum sp. 3684, complete genome
NC_020411.1	Hydrogenobaculum sp. HO, complete genome
NC_015587.1	Hydrogenobaculum sp. SHO, complete genome
CP004390.1	Hydrogenobaculum sp. SN, complete genome
NC_020814.1	Hydrogenobaculum sp. SN, complete genome
NC_011126.1	Hydrogenobaculum sp. Y04AAS1, complete genome
CP006587.1	Hymenobacter sp. APR13, complete genome
CP010054.1	Hymenobacter sp. DG25B, complete genome
NC_008818.1	Hyperthermus butylicus DSM 5456, complete genome
NC_021172.1	Hyphomicrobium denitrificans 1NES1, complete genome
NC_014313.1	Hyphomicrobium denitrificans ATCC 51888, complete genome
NC_015717.1	Hyphomicrobium sp. MC1 chromosome, complete genome
NC_008358.1	Hyphomonas neptunium ATCC 15444, complete genome
NC_021286.1	Idiomarina loihiensis GSL 199, complete genome
NC_006512.1	Idiomarina loihiensis L2TR, complete genome
NC_017464.1	Ignavibacterium album JCM 16511, complete genome
NC_009776.1	Ignicoccus hospitalis KIN4/I, complete genome
NC_020520.1	Ilumatobacter coccineus YM16-304 DNA, complete genome
NC_014632.1	Ilyobacter polytropus DSM 2926, complete genome
NC_014830.1	Intrasporangium calvum DSM 43043, complete genome
NC_015588.1	Isoptericola variabilis 225, complete genome
NC_014962.1	Isosphaera pallida ATCC 43644, complete genome
NC_007802.1	Jannaschia sp. CCS1, complete genome
NC_009659.1	Janthinobacterium sp. Marseille, complete genome
CP009416.1	Jeotgalibacillus malaysiensis strain D5 chromosome, complete genome
NC_013174.1	Jonesia denitrificans DSM 20603, complete genome
CP010975.1	Kangiella geojedonensis strain YCS-5, complete genome
NC_013166.1	Kangiella koreensis DSM 16069, complete genome
NC_014625.1	Ketogulonicigenium vulgare Y25, complete genome
NC_009664.2	Kineococcus radiotolerans SRS30216, complete genome
NC_016109.1	Kitasatospora setae KM-6054 DNA, complete genome
NC_018106.1	Klebsiella michiganensis E718, complete genome
CP004887.1	Klebsiella michiganensis HKOPL1, complete genome
CP008841.1	Klebsiella michiganensis strain M1, complete genome
CP011077.1	Klebsiella michiganensis strain RC10, complete genome
CP008788.1	Klebsiella oxytoca KONIH1, complete genome
NC_011283.1	Klebsiella pneumoniae 342, complete genome
NC_022566.1	Klebsiella pneumoniae CG43, complete genome
CP006738.1	Klebsiella pneumoniae HK787, complete genome
NC_022082.1	Klebsiella pneumoniae JM45, complete genome
CP010361.1	Klebsiella pneumoniae strain 32192, complete genome
CP010392.1	Klebsiella pneumoniae strain 34618, complete genome
CP009114.1	Klebsiella pneumoniae strain blaNDM-1, complete genome
CP008929.1	Klebsiella pneumoniae strain PMK1, complete genome
CP009461.1	Klebsiella pneumoniae strain XH209, complete genome
NC_018522.1	Klebsiella pneumoniae subsp. pneumoniae 1084, complete genome
CP006722.1	Klebsiella pneumoniae subsp. pneumoniae 1158, complete genome
CP003999.1	Klebsiella pneumoniae subsp. pneumoniae Kp13 chromosome, complete genome
CP008700.1	Klebsiella pneumoniae subsp. pneumoniae KP5-1, complete genome
CP008827.1	Klebsiella pneumoniae subsp. pneumoniae KPNIH1, complete genome
CP008797.1	Klebsiella pneumoniae subsp. pneumoniae KPNIH24, complete genome
NC_009648.1	Klebsiella pneumoniae subsp. pneumoniae MGH 78578, complete genome
NC_012731.1	Klebsiella pneumoniae subsp. pneumoniae NTUH-K2044 DNA, complete genome
CP006798.1	Klebsiella pneumoniae subsp. pneumoniae PittNDM01, complete genome
CP011313.1	Klebsiella pneumoniae subsp. pneumoniae strain 234-12, complete genome
CP009208.1	Klebsiella pneumoniae subsp. pneumoniae strain ATCC 43816 KPPR1, complete genome
CP009775.1	Klebsiella pneumoniae subsp. pneumoniae strain KPNIH32, complete genome
CP009771.1	Klebsiella pneumoniae subsp. pneumoniae strain KPNIH33, complete genome
NC_013850.1	Klebsiella variicola At-22, complete genome
NC_010617.1	Kocuria rhizophila DC2201 DNA, complete genome
NC_016027.1	Komagataeibacter medellinensis NBRC 3288 DNA, complete genome
CP004360.1	Komagataeibacter xylinus E25 chromosome, complete genome
NC_012785.1	Kosmotoga olearia TBF 19.5.1, complete genome
NC_013729.1	Kribbella flavida DSM 17836, complete genome
NC_014098.1	Kyrpidia tusciae DSM 2912, complete genome
NC_013169.1	Kytococcus sedentarius DSM 20547, complete genome
NC_010001.1	Lachnoclostridium phytofermentans ISDg, complete genome
NC_015638.1	Lacinutrix sp. 5H-3-7-4, complete genome
AP014808.1	Lactobacillus acetotolerans DNA, complete genome, strain: NBRC 13120
NC_021181.2	Lactobacillus acidophilus La-14, complete genome
NC_006814.3	Lactobacillus acidophilus NCFM chromosome, complete genome
NC_017470.1	Lactobacillus amylovorus GRL1118, complete genome
NC_015214.1	Lactobacillus amylovorus strain 30SC, complete genome
NC_008497.1	Lactobacillus brevis ATCC 367, complete genome
NC_020819.1	Lactobacillus brevis KB290 DNA, complete genome
NC_018610.1	Lactobacillus buchneri CD034, complete genome
NC_015428.1	Lactobacillus buchneri NRRL B-30929, complete genome
CP006690.1	Lactobacillus casei 12A, complete genome
NC_010999.1	Lactobacillus casei BL23 complete genome, strain BL23
NC_017473.1	Lactobacillus casei LC2W, complete genome
NC_021721.1	Lactobacillus casei LOCK919, complete genome
NC_014334.2	Lactobacillus casei str. Zhang, complete genome
AP012544.1	Lactobacillus casei subsp. casei ATCC 393 DNA, complete genome
NC_017469.1	Lactobacillus delbrueckii subsp. bulgaricus 2038, complete genome
NC_008054.1	Lactobacillus delbrueckii subsp. bulgaricus ATCC 11842 complete genome
NC_008529.1	Lactobacillus delbrueckii subsp. bulgaricus ATCC BAA-365, complete genome
NC_014727.1	Lactobacillus delbrueckii subsp. bulgaricus ND02, complete genome
NC_021235.1	Lactobacillus fermentum F-6, complete genome
NC_010610.1	Lactobacillus fermentum IFO 3956 DNA, complete genome
CP006809.1	Lactobacillus gasseri 130918, complete genome
NC_008530.1	Lactobacillus gasseri ATCC 33323, complete genome
NC_021744.1	Lactobacillus helveticus CNRZ32, complete genome
NC_010080.1	Lactobacillus helveticus DPC 4571, complete genome
NC_017467.1	Lactobacillus helveticus H10, complete genome
CP002427.1	Lactobacillus helveticus H9, complete genome
CP009907.1	Lactobacillus helveticus strain KLDS1.8701, complete genome
AP014680.1	Lactobacillus hokkaidonensis DNA, complete genome
NC_017477.1	Lactobacillus johnsonii DPC 6026, complete genome
NC_013504.1	Lactobacillus johnsonii FI9785, complete genome
NC_022909.1	Lactobacillus johnsonii N6.2, complete genome
NC_005362.1	Lactobacillus johnsonii NCC 533, complete genome
NC_015602.1	Lactobacillus kefiranofaciens ZW3, complete genome
CP011013.1	Lactobacillus mucosae LM1, complete genome
NC_008526.1	Lactobacillus paracasei ATCC 334 chromosome, complete genome
CP007122.1	Lactobacillus paracasei N1115, complete genome
NC_022112.1	Lactobacillus paracasei subsp. paracasei 8700:2, complete genome
AP012541.1	Lactobacillus paracasei subsp. paracasei JCM 8130 DNA, complete genome
NC_021514.1	Lactobacillus plantarum 16, complete genome
CP004406.1	Lactobacillus plantarum DOMLa, complete genome
NC_021224.2	Lactobacillus plantarum subsp. plantarum P-8, complete genome
NC_014554.1	Lactobacillus plantarum subsp. plantarum ST-III, complete genome
NC_004567.2	Lactobacillus plantarum WCFS1, complete genome
NC_020229.1	Lactobacillus plantarum ZJ316, complete genome
NC_009513.1	Lactobacillus reuteri DSM 20016, complete genome
NC_021494.1	Lactobacillus reuteri I5007, complete genome
NC_010609.1	Lactobacillus reuteri JCM 1112 DNA, complete genome
NC_015697.1	Lactobacillus reuteri SD2112, complete genome
NC_021872.1	Lactobacillus reuteri TD1, complete genome
NC_017482.1	Lactobacillus rhamnosus ATCC 53103 DNA, complete genome
NC_017491.1	Lactobacillus rhamnosus ATCC 8530, complete genome
NC_013198.1	Lactobacillus rhamnosus GG whole genome sequence, strain GG (ATCC 53103)
NC_013199.1	Lactobacillus rhamnosus Lc 705 whole genome sequence, strain Lc 705
NC_021723.1	Lactobacillus rhamnosus LOCK900, complete genome
NC_021725.1	Lactobacillus rhamnosus LOCK908, complete genome
NC_007576.1	Lactobacillus sakei strain 23K complete genome
NC_017481.1	Lactobacillus salivarius CECT 5713, complete genome
CP007646.1	Lactobacillus salivarius strain JCM1046, complete genome
NC_007929.1	Lactobacillus salivarius UCC118 chromosome, complete genome
NC_015978.1	Lactobacillus sanfranciscensis TMW 1.1304, complete genome
CP009531.1	Lactobacillus sp. wkB8, complete genome
NC_015930.1	Lactococcus garvieae ATCC 49156 DNA, complete genome
NC_017490.1	Lactococcus garvieae Lg2 DNA, complete genome
CP009472.1	Lactococcus lactis strain AI06, complete genome
NC_017492.1	Lactococcus lactis subsp. cremoris A76, complete genome
NC_022369.1	Lactococcus lactis subsp. cremoris KW2, complete genome
NC_009004.1	Lactococcus lactis subsp. cremoris MG1363, complete genome
NC_017949.1	Lactococcus lactis subsp. cremoris NZ9000, complete genome
NC_008527.1	Lactococcus lactis subsp. cremoris SK11, complete genome
NC_019435.1	Lactococcus lactis subsp. cremoris UC509.9, complete genome
NC_017486.1	Lactococcus lactis subsp. lactis CV56, complete genome
NC_002662.1	Lactococcus lactis subsp. lactis Il1403 chromosome, complete genome
NC_020450.1	Lactococcus lactis subsp. lactis IO-1 DNA, complete genome
NC_013656.1	Lactococcus lactis subsp. lactis KF147, complete genome
CP006766.1	Lactococcus lactis subsp. lactis KLDS 4.0325, complete genome
NC_022593.1	Lactococcus lactis subsp. lactis KLDS 4.0325, complete genome
CP009054.1	Lactococcus lactis subsp. lactis NCDO 2118, complete genome
CP010050.1	Lactococcus lactis subsp. lactis strain S0, complete genome
NC_012559.1	Laribacter hongkongensis HLHK9, complete genome
NC_020127.1	Lawsonia intracellularis N343, complete genome
NC_008011.1	Lawsonia intracellularis PHE/MN1-00
NC_014655.1	Leadbetterella byssophila DSM 17132, complete genome
LN614827.1	Legionella fallonii LLAP-10 genome assembly LFA, chromosome : I
CP004006.1	Legionella oakridgensis ATCC 33761 = DSM 21215, complete genome
NC_014125.1	Legionella pneumophila 2300/99 Alcoy, complete genome
NC_009494.2	Legionella pneumophila str. Corby, complete genome
NC_016811.1	Legionella pneumophila subsp. pneumophila ATCC 43290, complete genome
NC_020521.1	Legionella pneumophila subsp. pneumophila LPE509, complete genome
CP003023.1	Legionella pneumophila subsp. pneumophila str. Hextuple_2q strain Lp02 chromosome, complete genome
CP003024.1	Legionella pneumophila subsp. pneumophila str. Hextuple_3a strain Lp02 substr. hextuple 3a chromosome, complete genome
FQ958211.1	Legionella pneumophila subsp. pneumophila str. HL06041035 chromosome, complete genome
NC_018140.1	Legionella pneumophila subsp. pneumophila str. HL06041035 chromosome, complete genome
NC_018139.1	Legionella pneumophila subsp. pneumophila str. Lorraine chromosome, complete genome
CP003730.1	Legionella pneumophila subsp. pneumophila str. Thunder Bay, complete genome
NC_022438.1	Leifsonia xyli subsp. cynodontis DSM 46306, complete genome
NC_006087.1	Leifsonia xyli subsp. xyli str. CTCB07, complete genome
AP014642.1	Leptolyngbya boryana dg5 DNA, complete genome, strain: dg5
AP014638.1	Leptolyngbya boryana IAM M-101 DNA, complete genome, strain: IAM M-101
NC_019683.1	Leptolyngbya sp. PCC 7376, complete genome
CP000777.1	Leptospira biflexa serovar Patoc strain 'Patoc 1 (Ames)' chromosome I, complete sequence
CP000786.1	Leptospira biflexa serovar Patoc strain 'Patoc 1 (Paris)' chromosome I, complete sequence
CP000350.1	Leptospira borgpetersenii serovar Hardjo-bovis JB197 chromosome 1, complete sequence
CP000348.1	Leptospira borgpetersenii serovar Hardjo-bovis L550 chromosome 1, complete sequence
AE016823.1	Leptospira interrogans serovar Copenhageni str. Fiocruz L1-130, chromosome I, complete sequence
AE010300.2	Leptospira interrogans serovar Lai str. 56601 chromosome I, complete sequence
CP001221.1	Leptospira interrogans serovar Lai str. IPAV chromosome 1, complete sequence
NC_018649.1	Leptospirillum ferriphilum ML-04, complete genome
NC_017094.1	Leptospirillum ferrooxidans C2-3 DNA, complete genome
NC_010524.1	Leptothrix cholodnii SP-6, complete genome
NC_013192.1	Leptotrichia buccalis DSM 1135, complete genome
NC_018673.1	Leuconostoc carnosum JB16, complete genome
NC_010471.1	Leuconostoc citreum KM20, complete genome
NC_014319.1	Leuconostoc gasicomitatum LMG 18811 complete genome, type strain LMG 18811T
NC_018631.1	Leuconostoc gelidum JB7, complete genome
NC_014136.1	Leuconostoc kimchii IMSNU 11154, complete genome
NC_008531.1	Leuconostoc mesenteroides subsp. mesenteroides ATCC 8293, complete genome
NC_016805.3	Leuconostoc mesenteroides subsp. mesenteroides J18, complete genome
NC_015734.1	Leuconostoc sp. C2, complete genome
NC_019907.1	Liberibacter crescens BT-1, complete genome
NC_003212.1	Listeria innocua Clip11262 complete genome
NC_016011.1	Listeria ivanovii subsp. ivanovii PAM 55, complete genome
CP009577.1	Listeria ivanovii subsp. ivanovii strain WSLC 3010, complete genome
CP009576.1	Listeria ivanovii subsp. londoniensis strain WSLC 30151, complete genome
CP009575.1	Listeria ivanovii subsp. londoniensis strain WSLC 30167, complete genome
CP007172.1	Listeria ivanovii WSLC3009, complete genome
NC_017728.1	Listeria monocytogenes 07PF0776, complete genome
NC_013766.2	Listeria monocytogenes 08-5578, complete genome
NC_013768.1	Listeria monocytogenes 08-5923, complete genome
NC_017544.1	Listeria monocytogenes 10403S, complete genome
HG813249.1	Listeria monocytogenes 6179 chromosome sequence
NC_012488.1	Listeria monocytogenes Clip80459 serotype 4b complete genome
HG421741.1	Listeria monocytogenes EGD, complete genome
NC_003210.1	Listeria monocytogenes EGD-e chromosome, complete genome
NC_017547.1	Listeria monocytogenes Finland 1998, complete genome
NC_017546.1	Listeria monocytogenes FSL R2-561, complete genome
NC_011660.1	Listeria monocytogenes HCC23, complete genome
NC_017545.1	Listeria monocytogenes J0161, complete genome
NC_021829.2	Listeria monocytogenes J1-220, complete genome
NC_021830.2	Listeria monocytogenes J1816, complete genome
NC_017529.1	Listeria monocytogenes L99 serovar 4a, complete genome
NC_017537.1	Listeria monocytogenes M7, complete genome
HG813247.1	Listeria monocytogenes R479a chromosome, complete genome
HF558398.1	Listeria monocytogenes serotype 4b str. LL195, complete genome
NC_019556.1	Listeria monocytogenes serotype 4b str. LL195, complete genome
NC_002973.6	Listeria monocytogenes str. 4b F2365, complete genome
NC_018584.1	Listeria monocytogenes strain ATCC 19117, serotype 4d
NC_021823.1	Listeria monocytogenes strain C1-387, complete genome
CP007600.1	Listeria monocytogenes strain CFSAN006122, complete genome
CP010346.1	Listeria monocytogenes strain IZSAM_Lm_hs2008, complete genome
NC_021825.1	Listeria monocytogenes strain J1-108, complete genome
CP006598.1	Listeria monocytogenes strain J1776, complete genome
NC_021839.1	Listeria monocytogenes strain J1776, complete genome
NC_021827.1	Listeria monocytogenes strain J1817, complete genome
NC_021840.1	Listeria monocytogenes strain J1926, complete genome
CP006593.1	Listeria monocytogenes strain J2-031, complete genome
NC_021837.1	Listeria monocytogenes strain J2-031, complete genome
CP006592.1	Listeria monocytogenes strain J2-064, complete genome
NC_021824.1	Listeria monocytogenes strain J2-064, complete genome
NC_018642.1	Listeria monocytogenes strain L312, serotype 4b
CP009258.1	Listeria monocytogenes strain Lm60, complete genome
NC_021826.1	Listeria monocytogenes strain N1-011A, complete genome
CP011004.1	Listeria monocytogenes strain N2306, complete genome
CP009897.1	Listeria monocytogenes strain NTSN, complete genome
NC_021838.1	Listeria monocytogenes strain R2-502, complete genome
FR733648.1	Listeria monocytogenes strain SLCC2372, serotype 1/2c
NC_018590.1	Listeria monocytogenes strain SLCC2376, serotype 4c
NC_018585.1	Listeria monocytogenes strain SLCC2378, serotype 4e
NC_018589.1	Listeria monocytogenes strain SLCC2479, serotype 3c
NC_018586.1	Listeria monocytogenes strain SLCC2540, serotype 3b
FR733646.1	Listeria monocytogenes strain SLCC2755, serotype 1/2b
NC_018592.1	Listeria monocytogenes strain SLCC5850, serotype 1/2a
NC_018593.1	Listeria monocytogenes strain SLCC7179, serotype 3a
CP007160.1	Listeria monocytogenes WSLC1001, complete genome
CP007210.1	Listeria monocytogenes WSLC1042, complete genome
FN557490.1	Listeria seeligeri serovar 1/2b str. SLCC3954 complete genome
NC_013891.1	Listeria seeligeri serovar 1/2b str. SLCC3954 complete genome
NC_008555.1	Listeria welshimeri serovar 6b str. SLCC5334 complete genome
CP010820.1	Lysinibacillus fusiformis strain RB-21, complete genome
CP000817.1	Lysinibacillus sphaericus C3-41, complete genome
CP006837.1	Lysinibacillus varians strain GY32, complete genome
NC_011999.1	Macrococcus caseolyticus JCSC5402 DNA, complete genome
NC_013895.2	Mageeibacillus indolicus UPII9-5, complete genome
NC_008576.1	Magnetococcus marinus MC-1, complete genome
FO538765.1	Magnetospira sp. QH-2 chromosome, complete genome
HG794546.1	Magnetospirillum gryphiswaldense MSR-1 v2, complete genome
NC_015520.1	Mahella australiensis 50-1 BON, complete genome
NC_021743.1	Mannheimia haemolytica D153, complete genome
NC_021738.1	Mannheimia haemolytica D171, complete genome
NC_021082.1	Mannheimia haemolytica M42548, complete genome
CP011099.1	Mannheimia haemolytica strain 89010807N lktA-, complete genome
CP011098.1	Mannheimia haemolytica strain 89010807N, complete genome
NC_021883.1	Mannheimia haemolytica USMARC_2286, complete genome
CP006942.1	Mannheimia sp. USDA-ARS-USMARC-1261, complete genome
NC_006300.1	Mannheimia succiniciproducens MBEL55E, complete genome
CP006943.1	Mannheimia varigena USDA-ARS-USMARC-1296, complete genome
CP006944.1	Mannheimia varigena USDA-ARS-USMARC-1312, complete genome
CP006953.1	Mannheimia varigena USDA-ARS-USMARC-1388, complete genome
NC_014472.1	Maribacter sp. HTCC2170, complete genome
NC_008347.1	Maricaulis maris MCS10, complete genome
CP007031.1	Marichromatium purpuratum 984, complete genome
NC_015387.1	Marinithermus hydrothermalis DSM 14884, complete genome
NC_016751.1	Marinitoga piezophila KA3, complete genome
NC_017506.1	Marinobacter adhaerens HP15, complete genome
NC_017067.1	Marinobacter hydrocarbonoclasticus str. ATCC 49840 chromosome, complete genome
NC_008740.1	Marinobacter hydrocarbonoclasticus VT8, complete genome
CP007152.1	Marinobacter salarius strain R9SW1, complete genome
CP007151.1	Marinobacter similis strain A3d10, complete genome
NC_018268.1	Marinobacter sp. BSs20148, complete genome
NC_015276.1	Marinomonas mediterranea MMB-1, complete genome
NC_015559.1	Marinomonas posidonica IVIA-Po-181, complete genome
NC_009654.1	Marinomonas sp. MWYL1, complete genome
NC_014759.1	Marivirga tractuosa DSM 4126, complete genome
CP010803.1	Martelella endophytica strain YC6887, complete genome
NC_013946.1	Meiothermus ruber DSM 1279, complete genome
NC_014212.1	Meiothermus silvanus DSM 9946, complete genome
NC_018178.1	Melioribacter roseus P3M, complete genome
NC_015516.1	Melissococcus plutonius ATCC 35311 DNA, complete genome
AP012282.1	Melissococcus plutonius DAT561 DNA, complete genome
NC_006055.1	Mesoplasma florum L1 chromosome, complete genome
CP006778.1	Mesoplasma florum W37, complete genome
NC_019973.1	Mesorhizobium australicum WSM2073, complete genome
NC_014923.1	Mesorhizobium ciceri biovar biserrulae WSM1271 chromosome, complete genome
NC_002678.2	Mesorhizobium loti MAFF303099 DNA, complete genome
NC_015675.1	Mesorhizobium opportunistum WSM2075, complete genome
NC_017934.1	Mesotoga prima MesG1.Ag.4.2, complete genome
NC_015435.1	Metallosphaera cuprina Ar-4, complete genome
NC_009440.1	Metallosphaera sedula DSM 5348, complete genome
NC_015216.1	Methanobacterium lacus strain AL-21, complete genome
NC_015574.1	Methanobacterium paludis strain SWAN1, complete genome
NC_013790.1	Methanobrevibacter ruminantium M1, complete genome
NC_009515.1	Methanobrevibacter smithii ATCC 35061, complete genome
NC_021355.1	Methanobrevibacter sp. AbM4, complete genome
NC_013156.1	Methanocaldococcus fervens AG86, complete genome
NC_014122.1	Methanocaldococcus infernus ME, complete genome
NC_013887.1	Methanocaldococcus sp. FS406-22, complete genome
NC_013407.1	Methanocaldococcus vulcanius M7, complete genome
NC_009464.1	Methanocella arvoryzae MRE50 complete genome
NC_017034.1	Methanocella conradii HZ254, complete genome
NC_007955.1	Methanococcoides burtonii DSM 6242, complete genome
NC_009635.1	Methanococcus aeolicus Nankai-3, complete genome
NC_009135.1	Methanococcus maripaludis C5, complete genome
NC_009975.1	Methanococcus maripaludis C6, complete genome
NC_009637.1	Methanococcus maripaludis C7, complete genome
NC_005791.1	Methanococcus maripaludis strain S2, complete sequence
NC_015847.1	Methanococcus maripaludis X1, complete genome
NC_009634.1	Methanococcus vannielii SB, complete genome
NC_014222.1	Methanococcus voltae A3, complete genome
NC_008942.1	Methanocorpusculum labreanum Z, complete genome
NC_014253.1	Methanohalobium evestigatum Z-7303, complete genome
NC_014002.1	Methanohalophilus mahii DSM 5219, complete genome
NC_014507.1	Methanolacinia petrolearia DSM 11571, complete genome
NC_018876.1	Methanolobus psychrophilus R15, complete genome
NC_019977.1	Methanomethylovorans hollandica DSM 15978, complete genome
NC_009712.1	Methanoregula boonei 6A8, complete genome
NC_019943.1	Methanoregula formicica SMSP, complete genome
NC_015416.1	Methanosaeta concilii GP-6, complete genome
NC_017527.1	Methanosaeta harundinacea 6Ac, complete genome
NC_015676.1	Methanosalsum zhilinae DSM 4017, complete genome
NC_003552.1	Methanosarcina acetivorans str. C2A, complete genome
NC_007355.1	Methanosarcina barkeri str. Fusaro, complete genome
NC_003901.1	Methanosarcina mazei strain Goe1, complete genome
NC_007681.1	Methanosphaera stadtmanae DSM 3091, complete genome
NC_011832.1	Methanosphaerula palustris E1-9c, complete genome
NC_007796.1	Methanospirillum hungatei JF-1, complete genome
NC_000916.1	Methanothermobacter thermautotrophicus str. Delta H, complete genome
NC_015636.1	Methanothermococcus okinawensis IH1, complete genome
NC_014658.1	Methanothermus fervidus DSM 2088, complete genome
NC_015562.1	Methanotorris igneus Kol 5, complete genome
NC_010794.1	Methylacidiphilum infernorum V4, complete genome
NC_008825.1	Methylibium petroleiphilum PM1, complete genome
NC_007947.1	Methylobacillus flagellatus KT, complete genome
CP001511.1	Methylobacterium extorquens AM1 megaplasmid, complete sequence
NC_012808.1	Methylobacterium extorquens AM1, complete genome
NC_011757.1	Methylobacterium extorquens CM4, complete genome
NC_012988.1	Methylobacterium extorquens DM4 str. DM4 chromosome, complete genome
NC_010172.1	Methylobacterium extorquens PA1, complete genome
NC_011894.1	Methylobacterium nodulans ORS 2060, complete genome
NC_010725.1	Methylobacterium populi BJ001, complete genome
NC_010505.1	Methylobacterium radiotolerans JCM 2831, complete genome
NC_010511.1	Methylobacterium sp. 4-46, complete genome
AP014648.1	Methyloceanibacter caenitepidi DNA, complete genome, strain: Gela4
NC_011666.1	Methylocella silvestris BL2, complete genome
NC_002977.6	Methylococcus capsulatus str. Bath, complete genome
HE956757.1	Methylocystis sp. SC2 complete genome
NC_016112.1	Methylomicrobium alcaliphilum str. 20Z chromosome, complete genome
NC_015572.1	Methylomonas methanica MC09, complete genome
NC_017856.1	Methylophaga frappieri strain JAM7, complete genome
NC_017857.3	Methylophaga nitratireducenticrescens strain JAM1, complete genome
NC_012968.1	Methylotenera mobilis JLW8, complete genome
NC_014207.1	Methylotenera versatilis 301, complete genome
NC_012969.1	Methylovorus glucosetrophus SIP3-4, complete genome
NC_014733.1	Methylovorus sp. MP688, complete genome
NC_016026.1	Micavibrio aeruginosavorus ARL-13, complete genome
NC_020812.1	Micavibrio aeruginosavorus EPB, complete genome
NC_015125.1	Microbacterium testaceum StLB037 DNA, complete genome
NC_012803.1	Micrococcus luteus NCTC 2665, complete genome
NC_019738.1	Microcoleus sp. PCC 7113, complete genome
CP011304.1	Microcystis aeruginosa NIES-2549, complete genome
NC_010296.1	Microcystis aeruginosa NIES-843 DNA, complete genome
NC_015635.1	Microlunatus phosphovorus NM-1 DNA, complete genome
NC_014391.1	Micromonospora aurantiaca ATCC 27029, complete genome
NC_014815.1	Micromonospora sp. L5, complete genome
NC_014246.1	Mobiluncus curtisii ATCC 43063, complete genome
NC_017955.1	Modestobacter marinus str. BC501 chromosome, complete genome
NC_007644.1	Moorella thermoacetica ATCC 39073 chromosome, complete genome
NC_014147.1	Moraxella catarrhalis BBH18, complete genome
CP007669.1	Moraxella catarrhalis strain 25239, complete genome
CP008804.1	Moraxella catarrhalis strain 25240, complete genome
HG934468.1	Mucinivorans hirudinis complete genome
CP011071.1	Muricauda lutaonensis strain CC-HSB-11, complete genome
NC_015945.1	Muricauda ruestringensis DSM 13258, complete genome
CU458896.1	Mycobacterium abscessus ATCC 19977 chromosome, complete sequence
[truncated: 1,498 more rows]
