# Supplementary material for: Viral Dark Matter in the Gut Virome of Elderly Humans
Source: Preprints.org preprint supplement (doi:10.20944/preprints201807.0101.v1), 2018-07-05
Supplement: Supplementary file 9 [file Supp_Table_8_Phage.DB.WIsH.results.xlsx]

## Sheet: Supp_Table_5
PHAGE_HOST_LOGLIKELIHOOD	PHAGE_ACCESSION	PHAGE_FASTA_DESCRIPTION	PHAGE_HOST_FROM_DESCRIPTION	BACTERIA_ACCESSION	BACTERIAL_FASTA_DESCRIPTION	BACTERIAL_GENUS
-1.37056	AB002632.1	VIBRIO PHAGE FS2 DNA, COMPLETE GENOME. [25-AUG-2017]	VIBRIO	NC_009654.1	MARINOMONAS SP. MWYL1, COMPLETE GENOME	MARINOMONAS
-1.29811	AB008550.1	PSEUDOMONAS PHAGE PHICTX DNA, COMPLETE GENOME. [25-AUG-2017]	PSEUDOMONAS	NC_023149.1	PSEUDOMONAS AERUGINOSA SCV20265, COMPLETE GENOME	PSEUDOMONAS
-1.30803	AB009866.2	STAPHYLOCOCCUS PHAGE PVL PROVIRAL DNA, COMPLETE SEQUENCE. [25-AUG-2017]	STAPHYLOCOCCUS	CP007454.1	STAPHYLOCOCCUS AUREUS STRAIN 502A, COMPLETE GENOME	STAPHYLOCOCCUS
-1.36952	AB012573.1	VIBRIO PHAGE VF33 DNA, COMPLETE GENOME. [13-NOV-2015]	VIBRIO	BA000031.2	VIBRIO PARAHAEMOLYTICUS RIMD 2210633 DNA, CHROMOSOME 1, COMPLETE SEQUENCE	VIBRIO
-1.35403	AB016282.1	BACTERIOPHAGE PHI-105 DNA, COMPLETE SEQUENCE. [25-AUG-2017]	UNKNOWN	CP010406.1	BACILLUS SP. PC3, COMPLETE GENOME	BACILLUS
-1.3396	AB043678.1	VIBRIO PHAGE VFO3K6 DNA, COMPLETE GENOME. [26-MAY-2017]	VIBRIO	BA000031.2	VIBRIO PARAHAEMOLYTICUS RIMD 2210633 DNA, CHROMOSOME 1, COMPLETE SEQUENCE	VIBRIO
-1.33851	AB043679.1	VIBRIO PHAGE VFO4K68 DNA, COMPLETE GENOME. [26-MAY-2017]	VIBRIO	BA000031.2	VIBRIO PARAHAEMOLYTICUS RIMD 2210633 DNA, CHROMOSOME 1, COMPLETE SEQUENCE	VIBRIO
-1.30484	AB044554.1	STAPHYLOCOCCUS PROPHAGE PHIPV83 PROVIRAL DNA, COMPLETE SEQUENCE. [25-AUG-2017]	STAPHYLOCOCCUS	LN626917.1	STAPHYLOCOCCUS AUREUS GENOME ASSEMBLY STAPHYLOCOCCUS_AUREUS_ILRI_EYMOLE1/1, CHROMOSOME : I	STAPHYLOCOCCUS
-1.30066	AB045978.2	STAPHYLOCOCCUS PHAGE PHISLT DNA, COMPLETE GENOME. [25-AUG-2017]	STAPHYLOCOCCUS	NC_009487.1	STAPHYLOCOCCUS AUREUS SUBSP. AUREUS JH9, COMPLETE GENOME	STAPHYLOCOCCUS
-1.30658	AB063393.2	THERMUS PHAGE IN93 DNA, COMPLETE GENOME. [26-MAY-2017]	THERMUS	NC_014974.1	THERMUS SCOTODUCTUS SA-01, COMPLETE GENOME	THERMUS
-1.34691	AB102868.1	ENTEROBACTERIA PHAGE ST104 DNA, COMPLETE GENOME. [25-AUG-2017]	ENTEROBACTERIA	CP007581.1	SALMONELLA ENTERICA SUBSP. ENTERICA SEROVAR TYPHIMURIUM STRAIN 138736, COMPLETE GENOME	SALMONELLA
-1.39665	AB231700.1	MICROCYSTIS PHAGE MA-LMM01 DNA, COMPLETE GENOME. [25-AUG-2017]	MICROCYSTIS	NC_007984.1	BAUMANNIA CICADELLINICOLA STR. HC (HOMALODISCA COAGULATA), COMPLETE GENOME	BAUMANNIA
-1.30836	AB243556.1	STAPHYLOCOCCUS PHAGE PHIPVL108 DNA, COMPLETE GENOME. [25-AUG-2017]	STAPHYLOCOCCUS	LN626917.1	STAPHYLOCOCCUS AUREUS GENOME ASSEMBLY STAPHYLOCOCCUS_AUREUS_ILRI_EYMOLE1/1, CHROMOSOME : I	STAPHYLOCOCCUS
-1.34729	AB255436.1	STX2-CONVERTING PHAGE 86 DNA, COMPLETE GENOME. [26-MAY-2017]	ESCHERICHIA	CP008957.1	ESCHERICHIA COLI O157:H7 STR. EDL933, COMPLETE GENOME	ESCHERICHIA
-1.34866	AB259123.1	RALSTONIA PHAGE RSM1 DNA, COMPLETE GENOME. [26-MAY-2017]	RALSTONIA	CP007441.1	PSEUDOMONAS STUTZERI STRAIN 28A24, COMPLETE GENOME	PSEUDOMONAS
-1.34793	AB259123.2	RALSTONIA PHAGE RSM1 DNA, COMPLETE GENOME	RALSTONIA	CP007441.1	PSEUDOMONAS STUTZERI STRAIN 28A24, COMPLETE GENOME	PSEUDOMONAS
-1.33618	AB259124.1	RALSTONIA PHAGE RSS1 DNA, COMPLETE GENOME. [26-MAY-2017]	RALSTONIA	CP007444.1	DYELLA JIANGNINGENSIS STRAIN SBZ 3-12, COMPLETE GENOME	DYELLA
-1.29584	AB276040.1	RALSTONIA PHAGE PHIRSA1 DNA, COMPLETE GENOME. [25-AUG-2017]	RALSTONIA	NC_003295.1	RALSTONIA SOLANACEARUM GMI1000 CHROMOSOME COMPLETE SEQUENCE	RALSTONIA
-1.33801	AB285204.1	PHAGE CDTI DNA, COMPLETE GENOME. [26-MAY-2017]	PHAGE	CP010371.1	ESCHERICHIA COLI STRAIN 6409, COMPLETE GENOME	ESCHERICHIA
-1.35936	AB362338.2	ENTEROBACTERIA PHAGE P22 DNA, COMPLETE SEQUENCE, STRAIN: MSU. [25-AUG-2017]	ENTEROBACTERIA	NC_011083.1	SALMONELLA ENTERICA SUBSP. ENTERICA SEROVAR HEIDELBERG STR. SL476, COMPLETE GENOME	SALMONELLA
-1.35708	AB366653.2	RALSTONIA PHAGE RSL1 DNA, COMPLETE GENOME. [25-AUG-2017]	RALSTONIA	NC_018014.1	TERRIGLOBUS ROSEUS DSM 18391, COMPLETE GENOME	TERRIGLOBUS
-1.30346	AB370205.1	STAPHYLOCOCCUS PHAGE PHIMR25 DNA, COMPLETE GENOME. [25-AUG-2017]	STAPHYLOCOCCUS	NC_009632.1	STAPHYLOCOCCUS AUREUS SUBSP. AUREUS JH1, COMPLETE GENOME	STAPHYLOCOCCUS
-1.31347	AB370268.1	STAPHYLOCOCCUS PHAGE PHIMR11 DNA, COMPLETE GENOME. [25-AUG-2017]	STAPHYLOCOCCUS	NC_009487.1	STAPHYLOCOCCUS AUREUS SUBSP. AUREUS JH9, COMPLETE GENOME	STAPHYLOCOCCUS
-1.32399	AB374228.1	VIBRIO PHAGE KAPPA PROVIRAL DNA, COMPLETE GENOME. [25-AUG-2017]	VIBRIO	CP001485.1	VIBRIO CHOLERAE MJ-1236 CHROMOSOME 1, COMPLETE SEQUENCE	VIBRIO
-1.35937	AB426868.1	ENTEROBACTERIA PHAGE P22 DNA, COMPLETE GENOME, STRAIN: ATCC 19585-B1. [25-AUG-2017]	ENTEROBACTERIA	NC_011083.1	SALMONELLA ENTERICA SUBSP. ENTERICA SEROVAR HEIDELBERG STR. SL476, COMPLETE GENOME	SALMONELLA
-1.3513	AB434711.1	RALSTONIA PHAGE RSM3 DNA, COMPLETE GENOME. [26-MAY-2017]	RALSTONIA	CP007441.1	PSEUDOMONAS STUTZERI STRAIN 28A24, COMPLETE GENOME	PSEUDOMONAS
-1.34208	AB451219.1	RALSTONIA PHAGE RSB1 DNA, COMPLETE GENOME. [24-FEB-2017]	RALSTONIA	CP001068.1	RALSTONIA PICKETTII 12J CHROMOSOME 1, COMPLETE SEQUENCE	RALSTONIA
-1.38267	AB472900.2	PSEUDOMONAS PHAGE KPP10 DNA, COMPLETE GENOME. [25-AUG-2017]	PSEUDOMONAS	CP007152.1	MARINOBACTER SALARIUS STRAIN R9SW1, COMPLETE GENOME	MARINOBACTER
-1.36104	AB560486.1	PSEUDOMONAS PHAGE KPP12 DNA, COMPLETE GENOME. [25-AUG-2017]	PSEUDOMONAS	NC_008009.1	CANDIDATUS KORIBACTER VERSATILIS ELLIN345, COMPLETE GENOME	CANDIDATUS
-1.3716	AB572858.1	VIBRIO PHAGE ND1-FS1 DNA, COMPLETE GENOME. [26-MAY-2017]	VIBRIO	NC_015276.1	MARINOMONAS MEDITERRANEA MMB-1, COMPLETE GENOME	MARINOMONAS
-1.3425	AB597179.1	RALSTONIA PHAGE RSB2 DNA, COMPLETE GENOME. [26-MAY-2017]	RALSTONIA	NC_018531.1	ARTHROBACTER SP. RUE61A, COMPLETE GENOME	ARTHROBACTER
-1.38311	AB605730.1	BACILLUS PHAGE SP10 DNA, COMPLETE SEQUENCE	BACILLUS	CP010976.1	PAENIBACILLUS SP. IHBB 10380, COMPLETE GENOME	PAENIBACILLUS
-1.29587	AB626962.1	STAPHYLOCOCCUS PHAGE S24-1 DNA, COMPLETE GENOME. [26-MAY-2017]	STAPHYLOCOCCUS	LN626917.1	STAPHYLOCOCCUS AUREUS GENOME ASSEMBLY STAPHYLOCOCCUS_AUREUS_ILRI_EYMOLE1/1, CHROMOSOME : I	STAPHYLOCOCCUS
-1.29796	AB647160.1	HELICOBACTER PHAGE KHP30 DNA, COMPLETE GENOME. [26-MAY-2017]	HELICOBACTER	NC_017372.1	HELICOBACTER PYLORI INDIA7, COMPLETE GENOME	HELICOBACTER
-1.36518	AB711120.1	BACILLUS PHAGE PM1 DNA, COMPLETE GENOME. [25-AUG-2017]	BACILLUS	NC_014639.1	BACILLUS ATROPHAEUS 1942, COMPLETE GENOME	BACILLUS
-1.3746	AB712291.1	ENTEROCOCCUS PHAGE BC-611 DNA, COMPLETE GENOME. [25-AUG-2017]	ENTEROCOCCUS	CP010820.1	LYSINIBACILLUS FUSIFORMIS STRAIN RB-21, COMPLETE GENOME	LYSINIBACILLUS
-1.39793	AB716666.1	KLEBSIELLA PHAGE NTUH-K2044-K1-1 DNA, COMPLETE GENOME. [25-AUG-2017]	KLEBSIELLA	CP009621.1	PONTIBACTER KORLENSIS STRAIN X14-1T, COMPLETE GENOME	PONTIBACTER
-1.39416	AB720063.2	XANTHOMONAS PHAGE CP1 DNA, COMPLETE GENOME. [26-MAY-2017]	XANTHOMONAS	NC_008260.1	ALCANIVORAX BORKUMENSIS SK2, COMPLETE GENOME	ALCANIVORAX
-1.25475	AB720064.1	XANTHOMONAS CITRI PHAGE CP2 DNA, COMPLETE GENOME. [26-MAY-2017]	XANTHOMONAS	NC_014640.1	ACHROMOBACTER XYLOSOXIDANS A8, COMPLETE GENOME	ACHROMOBACTER
-1.29439	AB731695.1	HELICOBACTER PHAGE KHP40 DNA, COMPLETE GENOME. [26-MAY-2017]	HELICOBACTER	NC_017372.1	HELICOBACTER PYLORI INDIA7, COMPLETE GENOME	HELICOBACTER
-1.39129	AB757800.1	EDWARDSIELLA PHAGE KF-1 DNA, COMPLETE GENOME. [26-MAY-2017]	EDWARDSIELLA	NC_018692.1	ALTEROMONAS MACLEODII STR. 'BLACK SEA 11', COMPLETE GENOME	ALTEROMONAS
-1.38723	AB767244.1	EDWARDSIELLA PHAGE MSW-3 DNA, COMPLETE GENOME. [25-AUG-2017]	EDWARDSIELLA	CP007557.1	CITROBACTER FREUNDII CFNIH1, COMPLETE GENOME	CITROBACTER
-1.31334	AB775548.1	PSEUDOMONAS PHAGE PPPW-3 DNA, COMPLETE SEQUENCE	PSEUDOMONAS	NC_021491.1	PSEUDOMONAS PUTIDA H8234, COMPLETE GENOME	PSEUDOMONAS
-1.37655	AB775549.1	PSEUDOMONAS PHAGE PPPW-4 DNA, COMPLETE SEQUENCE	PSEUDOMONAS	NC_018531.1	ARTHROBACTER SP. RUE61A, COMPLETE GENOME	ARTHROBACTER
-1.38129	AB797215.1	KLEBSIELLA PHAGE 0507-KN2-1 DNA, COMPLETE GENOME. [25-AUG-2017]	KLEBSIELLA	CP007142.1	GYNUELLA SUNSHINYII YC6258, COMPLETE GENOME	GYNUELLA
-1.37316	AB823818.1	PHAGE PHI OH2 DNA, COMPLETE GENOME. [25-AUG-2017]	PHAGE	NC_012491.1	BREVIBACILLUS BREVIS NBRC 100599 DNA, COMPLETE GENOME	BREVIBACILLUS
-1.33661	AB828698.1	RALSTONIA PHAGE RSS30 DNA, COMPLETE GENOME. [13-NOV-2015]	RALSTONIA	NC_020799.1	RALSTONIA SOLANACEARUM FQY_4, COMPLETE GENOME	RALSTONIA
-1.30063	AB853330.1	STAPHYLOCOCCUS PHAGE S25-3 DNA, COMPLETE GENOME	STAPHYLOCOCCUS	FN665652.1	CLOSTRIDIUM DIFFICILE COMPLETE GENOME, STRAIN CF5	CLOSTRIDIUM
-1.30096	AB853331.1	STAPHYLOCOCCUS PHAGE S25-4 DNA, COMPLETE GENOME	STAPHYLOCOCCUS	FN665652.1	CLOSTRIDIUM DIFFICILE COMPLETE GENOME, STRAIN CF5	CLOSTRIDIUM
-1.33944	AB854109.1	RALSTONIA PHAGE RSB3 DNA, COMPLETE GENOME. [26-MAY-2017]	RALSTONIA	CP010518.3	PANDORAEA APISTA STRAIN TF81F4, COMPLETE GENOME	PANDORAEA
-1.34638	AB863625.1	RALSTONIA PHAGE RSK1 DNA, COMPLETE GENOME. [25-AUG-2017]	RALSTONIA	CP007441.1	PSEUDOMONAS STUTZERI STRAIN 28A24, COMPLETE GENOME	PSEUDOMONAS
-1.30108	AB903967.1	STAPHYLOCOCCUS PHAGE PHISA012 DNA, COMPLETE GENOME. [25-AUG-2017]	STAPHYLOCOCCUS	FN665652.1	CLOSTRIDIUM DIFFICILE COMPLETE GENOME, STRAIN CF5	CLOSTRIDIUM
-1.33502	AB910393.1	PSEUDOMONAS PHAGE KPP25 DNA, COMPLETE SEQUENCE	PSEUDOMONAS	CP007509.1	PSEUDOMONAS STUTZERI STRAIN 19SMN4, COMPLETE GENOME	PSEUDOMONAS
-1.30326	AB916497.1	RALSTONIA PHAGE RS138 DNA, COMPLETE GENOME	RALSTONIA	NC_014640.1	ACHROMOBACTER XYLOSOXIDANS A8, COMPLETE GENOME	ACHROMOBACTER
-1.34502	AB920995.1	RALSTONIA PHAGE RSJ2 DNA, COMPLETE GENOME. [26-MAY-2017]	RALSTONIA	CP001068.1	RALSTONIA PICKETTII 12J CHROMOSOME 1, COMPLETE SEQUENCE	RALSTONIA
-1.3837	AB930182.1	BACILLUS PHAGE SPG24 DNA, CONTIG00001 SEQUENCE	BACILLUS	CP009281.1	PAENIBACILLUS SP. FSL R5-0345, COMPLETE GENOME	PAENIBACILLUS
-1.3452	AB937974.1	RALSTONIA PHAGE RS603 DNA, COMPLETE GENOME. [26-MAY-2017]	RALSTONIA	CP007441.1	PSEUDOMONAS STUTZERI STRAIN 28A24, COMPLETE GENOME	PSEUDOMONAS
-1.28059	AB967974.1	AURANTIMONAS PHAGE AMM-1 DNA, COMPLETE SEQUENCE	AURANTIMONAS	NC_009485.1	BRADYRHIZOBIUM SP. BTAI1, COMPLETE GENOME	BRADYRHIZOBIUM
-1.29892	AB981169.1	RALSTONIA PHAGE RSY1 DNA, COMPLETE GENOME. [25-AUG-2017]	RALSTONIA	NC_003295.1	RALSTONIA SOLANACEARUM GMI1000 CHROMOSOME COMPLETE SEQUENCE	RALSTONIA
-1.35086	AB981170.1	RALSTONIA PHAGE RSMSUPER DNA, COMPLETE GENOME. [26-MAY-2017]	RALSTONIA	CP007441.1	PSEUDOMONAS STUTZERI STRAIN 28A24, COMPLETE GENOME	PSEUDOMONAS
-1.34583	AB983711.1	RALSTONIA PHAGE RSJ5 DNA, COMPLETE GENOME	RALSTONIA	NC_007973.1	CUPRIAVIDUS METALLIDURANS CH34, COMPLETE GENOME	CUPRIAVIDUS
-1.3663	AE002163.1	CHLAMYDIA PHAGE PHICPAR39, COMPLETE SEQUENCE. [26-MAY-2017]	CHLAMYDIA	NC_015702.1	PARACHLAMYDIA ACANTHAMOEBAE UV-7, COMPLETE GENOME	PARACHLAMYDIA
-1.33966	AF009630.1	BACTERIOPHAGE BIL170, COMPLETE GENOME. [25-AUG-2017]	UNKNOWN	CP006766.1	LACTOCOCCUS LACTIS SUBSP. LACTIS KLDS 4.0325, COMPLETE GENOME	LACTOCOCCUS
-1.34036	AF011378.1	BACTERIOPHAGE SK1 COMPLETE GENOME. [25-AUG-2017]	UNKNOWN	NC_014393.1	CLOSTRIDIUM CELLULOVORANS 743B, COMPLETE GENOME	CLOSTRIDIUM
-1.34112	AF020713.1	BACTERIOPHAGE SPBC2 COMPLETE GENOME. [25-AUG-2017]	UNKNOWN	NC_014759.1	MARIVIRGA TRACTUOSA DSM 4126, COMPLETE GENOME	MARIVIRGA
-1.31608	AF022214.1	MYCOBACTERIOPHAGE D29, COMPLETE GENOME. [25-AUG-2017]	MYCOBACTERIUM	NC_016604.1	MYCOBACTERIUM RHODESIAE NBB3, COMPLETE GENOME	MYCOBACTERIUM
-1.38318	AF031901.1	BACTERIOPHAGE SPO1 EARLY GENE REGION OF THE TERMINAL REDUNDANCY, RIGHT-MOST SEQUENCE	UNKNOWN	NC_009633.1	ALKALIPHILUS METALLIREDIGENS QYMF, COMPLETE GENOME	ALKALIPHILUS
-1.4014	AF059242.1	BACTERIOPHAGE MX1, COMPLETE GENOME. [13-NOV-2015]	UNKNOWN	CP005957.1	CANDIDATUS SACCHARIMONAS AALBORGENSIS, COMPLETE GENOME	CANDIDATUS
-1.33998	AF063097.1	BACTERIOPHAGE P2, COMPLETE GENOME. [25-AUG-2017]	UNKNOWN	CP005998.1	ESCHERICHIA COLI B7A, COMPLETE GENOME	ESCHERICHIA
-1.37094	AF064539.1	BACTERIOPHAGE N15, COMPLETE GENOME. [26-MAY-2017]	UNKNOWN	NC_011751.1	ESCHERICHIA COLI UMN026, COMPLETE GENOME	ESCHERICHIA
-1.37199	AF065411.1	METHANOBACTERIUM PHAGE PSIM2, COMPLETE GENOME. [25-AUG-2017]	METHANOBACTERIUM	NC_000916.1	METHANOTHERMOBACTER THERMAUTOTROPHICUS STR. DELTA H, COMPLETE GENOME	METHANOTHERMOBACTER
-1.27151	AF068845.1	MYCOBACTERIOPHAGE TM4, COMPLETE GENOME. [26-MAY-2017]	MYCOBACTERIUM	CP009495.1	MYCOBACTERIUM SMEGMATIS STRAIN INHR1, COMPLETE GENOME	MYCOBACTERIUM
-1.36793	AF069308.1	BACTERIOPHAGE HK022, COMPLETE GENOME. [25-AUG-2017]	UNKNOWN	NC_013361.1	ESCHERICHIA COLI O26:H11 STR. 11368 DNA, COMPLETE GENOME	ESCHERICHIA
-1.36611	AF069529.1	BACTERIOPHAGE HK97, COMPLETE GENOME. [25-AUG-2017]	UNKNOWN	NC_017626.1	ESCHERICHIA COLI 042 COMPLETE GENOME	ESCHERICHIA
-1.36254	AF071201.1	BACTERIOPHAGE FELIX 1 RED GENE, COMPLETE CDS; AND UNKNOWN GENES	UNKNOWN	NC_014259.1	ACINETOBACTER OLEIVORANS DR1, COMPLETE GENOME	ACINETOBACTER
-1.24116	AF074945.1	MYCOPLASMA ARTHRITIDIS BACTERIOPHAGE MAV1, COMPLETE GENOME. [26-MAY-2017]	MYCOPLASMA	NC_011025.1	MYCOPLASMA ARTHRITIDIS 158L3-1, COMPLETE GENOME	MYCOPLASMA
-1.31798	AF083977.1	BACTERIOPHAGE MU, COMPLETE GENOME. [25-AUG-2017]	UNKNOWN	NC_016902.1	ESCHERICHIA COLI KO11, COMPLETE GENOME	ESCHERICHIA
-1.36268	AF085222.2	STREPTOCOCCUS THERMOPHILUS BACTERIOPHAGE DT1, COMPLETE GENOME. [26-MAY-2017]	STREPTOCOCCUS	NC_017595.1	STREPTOCOCCUS SALIVARIUS JIM8777 COMPLETE GENOME	STREPTOCOCCUS
-1.33061	AF109874.2	BACTERIOPHAGE TUC2009, COMPLETE GENOME. [25-AUG-2017]	UNKNOWN	NC_002662.1	LACTOCOCCUS LACTIS SUBSP. LACTIS IL1403 CHROMOSOME, COMPLETE GENOME	LACTOCOCCUS
-1.35935	AF115102.1	STREPTOCOCCUS THERMOPHILUS BACTERIOPHAGE SFI19, COMPLETE GENOME. [26-MAY-2017]	STREPTOCOCCUS	NC_017595.1	STREPTOCOCCUS SALIVARIUS JIM8777 COMPLETE GENOME	STREPTOCOCCUS
-1.35847	AF115103.1	STREPTOCOCCUS THERMOPHILUS BACTERIOPHAGE SFI21, COMPLETE GENOME. [26-MAY-2017]	STREPTOCOCCUS	CP009278.1	SPHINGOBACTERIUM SP. ML3W, COMPLETE GENOME	SPHINGOBACTERIUM
-1.32367	AF125163.2	BACTERIOPHAGE K139, COMPLETE GENOME	UNKNOWN	CP001236.1	VIBRIO CHOLERAE O395 CHROMOSOME II, COMPLETE SEQUENCE	VIBRIO
-1.33129	AF125520.1	BACTERIOPHAGE 933W, COMPLETE GENOME. [26-MAY-2017]	UNKNOWN	CP008957.1	ESCHERICHIA COLI O157:H7 STR. EDL933, COMPLETE GENOME	ESCHERICHIA
-1.243	AF133242.2	SPIROPLASMA PHAGE SVTS2, COMPLETE GENOME. [25-AUG-2017]	SPIROPLASMA	NC_020291.1	CLOSTRIDIUM SACCHAROPERBUTYLACETONICUM N1-4(HMT), COMPLETE GENOME	CLOSTRIDIUM
-1.36238	AF145054.1	STREPTOCOCCUS THERMOPHILUS BACTERIOPHAGE 7201, COMPLETE GENOME. [25-AUG-2017]	STREPTOCOCCUS	NC_017595.1	STREPTOCOCCUS SALIVARIUS JIM8777 COMPLETE GENOME	STREPTOCOCCUS
-1.35148	AF155037.1	ALTEROMONAS PHAGE PM2, COMPLETE GENOME. [28-FEB-2015]	ALTEROMONAS	CP001796.1	PSEUDOALTEROMONAS SP. SM9913 CHROMOSOME I, COMPLETE SEQUENCE	PSEUDOALTEROMONAS
-1.37267	AF157835.1	ACYRTHOSIPHON PISUM BACTERIOPHAGE APSE-1, COMPLETE GENOME. [25-AUG-2017]	ACYRTHOSIPHON	FO704551.1	XENORHABDUS POINARII STR. G6 CHROMOSOME, COMPLETE GENOME	XENORHABDUS
-1.34476	AF158101.6	ENTEROBACTERIA PHAGE T4, COMPLETE GENOME. [25-AUG-2017]	ENTEROBACTERIA	CP007447.1	STAPHYLOCOCCUS AUREUS STRAIN XN108, COMPLETE GENOME	STAPHYLOCOCCUS
-1.36419	AF158600.2	STREPTOCOCCUS THERMOPHILUS BACTERIOPHAGE SFI11, COMPLETE GENOME. [25-AUG-2017]	STREPTOCOCCUS	NC_013798.1	STREPTOCOCCUS GALLOLYTICUS UCN34 COMPLETE GENOME	STREPTOCOCCUS
-1.36137	AF165214.2	BACTERIOPHAGE D3, COMPLETE GENOME. [26-MAY-2017]	UNKNOWN	CP007441.1	PSEUDOMONAS STUTZERI STRAIN 28A24, COMPLETE GENOME	PSEUDOMONAS
-1.32749	AF176025.1	LACTOCOCCUS PHAGE BK5-T, COMPLETE GENOME. [26-MAY-2017]	LACTOCOCCUS	NC_002662.1	LACTOCOCCUS LACTIS SUBSP. LACTIS IL1403 CHROMOSOME, COMPLETE GENOME	LACTOCOCCUS
-1.37151	AF176027.1	COLIPHAGE PHIX174 ISOLATE S1, COMPLETE GENOME	COLIPHAGE	NC_009654.1	MARINOMONAS SP. MWYL1, COMPLETE GENOME	MARINOMONAS
-1.36993	AF176029.1	COLIPHAGE PHIX174 ISOLATE SC2, COMPLETE GENOME	COLIPHAGE	NC_009654.1	MARINOMONAS SP. MWYL1, COMPLETE GENOME	MARINOMONAS
-1.3701	AF176031.1	COLIPHAGE PHIX174 ISOLATE SCS2, COMPLETE GENOME	COLIPHAGE	NC_009654.1	MARINOMONAS SP. MWYL1, COMPLETE GENOME	MARINOMONAS
-1.36999	AF176033.1	COLIPHAGE PHIX174 ISOLATE SCSC2, COMPLETE GENOME	COLIPHAGE	NC_009654.1	MARINOMONAS SP. MWYL1, COMPLETE GENOME	MARINOMONAS
-1.36402	AF191796.1	HIS1 VIRUS, COMPLETE GENOME	UNKNOWN	NC_015177.1	PSEUDOPEDOBACTER SALTANS DSM 12145, COMPLETE GENOME	PSEUDOPEDOBACTER
-1.37441	AF191797.1	HIS2 VIRUS, COMPLETE GENOME	UNKNOWN	NC_015277.1	SPHINGOBACTERIUM SP. 21, COMPLETE GENOME	SPHINGOBACTERIUM
-1.32897	AF195901.1	LACTOBACILLUS PROPHAGE LJ928 LATE GENE CLUSTER SEQUENCE	LACTOBACILLUS	NC_017477.1	LACTOBACILLUS JOHNSONII DPC 6026, COMPLETE GENOME	LACTOBACILLUS
-1.31908	AF195902.3	LACTOBACILLUS JOHNSONII PROPHAGE LJ771, COMPLETE GENOME	LACTOBACILLUS	NC_008530.1	LACTOBACILLUS GASSERI ATCC 33323, COMPLETE GENOME	LACTOBACILLUS
-1.35889	AF217253.1	BACTERIOPHAGE P22 COMPLETE GENOME	UNKNOWN	NC_011083.1	SALMONELLA ENTERICA SUBSP. ENTERICA SEROVAR HEIDELBERG STR. SL476, COMPLETE GENOME	SALMONELLA
-1.35964	AF222060.1	HALORUBRUM PHAGE HF2, COMPLETE GENOME	HALORUBRUM	NC_017941.2	HALOFERAX MEDITERRANEI ATCC 33500, COMPLETE GENOME	HALOFERAX
-1.38066	AF226851.1	PSEUDOMONAS PHAGE PHI8 SEGMENT L, COMPLETE SEQUENCE. [26-MAY-2017]	PSEUDOMONAS	NC_014008.1	CORALIOMARGARITA AKAJIMENSIS DSM 45221, COMPLETE GENOME	CORALIOMARGARITA
-1.37334	AF226852.1	PSEUDOMONAS PHAGE PHI8 SEGMENT M, COMPLETE SEQUENCE. [13-NOV-2015]	PSEUDOMONAS	CP007152.1	MARINOBACTER SALARIUS STRAIN R9SW1, COMPLETE GENOME	MARINOBACTER
-1.37605	AF226853.1	PSEUDOMONAS PHAGE PHI8 SEGMENT S, COMPLETE SEQUENCE. [13-NOV-2015]	PSEUDOMONAS	NC_014008.1	CORALIOMARGARITA AKAJIMENSIS DSM 45221, COMPLETE GENOME	CORALIOMARGARITA
-1.30878	AF232233.1	BACTERIOPHAGE B3, COMPLETE GENOME. [25-AUG-2017]	UNKNOWN	NC_023149.1	PSEUDOMONAS AERUGINOSA SCV20265, COMPLETE GENOME	PSEUDOMONAS
-1.37251	AF234172.1	ENTEROBACTERIA PHAGE P1 MOD749::IS5 C1.100 MUTANT, COMPLETE GENOME	ENTEROBACTERIA	CP010440.1	ESCHERICHIA COLI K-12 STRAIN ER3476, COMPLETE GENOME	ESCHERICHIA
-1.37288	AF234173.1	ENTEROBACTERIA PHAGE P1 MOD1902::IS5 C1.100 REV DMT(DEL)MB MUTANT, COMPLETE GENOME	ENTEROBACTERIA	NC_017663.1	ESCHERICHIA COLI P12B, COMPLETE GENOME	ESCHERICHIA
-1.32432	AF242738.3	BACTERIOPHAGE PHI LC3, COMPLETE GENOME. [25-AUG-2017]	UNKNOWN	NC_013656.1	LACTOCOCCUS LACTIS SUBSP. LACTIS KF147, COMPLETE GENOME	LACTOCOCCUS
-1.27399	AF246223.1	MYCOPLASMA VIRUS P1, COMPLETE GENOME. [11-NOV-2016]	MYCOPLASMA	CP006777.1	CLOSTRIDIUM BEIJERINCKII ATCC 35702, COMPLETE GENOME	CLOSTRIDIUM
-1.37933	AF261666.1	DSRNA BACTERIOPHAGE PHI-13 SEGMENT S P8 (8), P12 (12), P9 (9), AND P5 -5 GENES, COMPLETE CDS. [29-AUG-2014]	UNKNOWN	CP007441.1	PSEUDOMONAS STUTZERI STRAIN 28A24, COMPLETE GENOME	PSEUDOMONAS
-1.36793	AF261667.1	DSRNA BACTERIOPHAGE PHI-13 SEGMENT M P10 (10), P6 (6), P3A (3A), P3B (3B), AND P3C (3C) GENES, COMPLETE CDS. [29-AUG-2014]	UNKNOWN	NC_016631.1	GRANULICELLA MALLENSIS MP5ACTX8, COMPLETE GENOME	GRANULICELLA
-1.36973	AF261668.1	DSRNA BACTERIOPHAGE PHI-13 SEGMENT L P7 (7), P2 (2), P4 (4), AND P1 -1 GENES, COMPLETE CDS. [26-MAY-2017]	UNKNOWN	NC_015564.1	HOYOSELLA SUBFLAVA DQS3-9A1, COMPLETE GENOME	HOYOSELLA
-1.32322	AF271693.1	MYCOBACTERIOPHAGE BXB1, COMPLETE SEQUENCE. [25-AUG-2017]	MYCOBACTERIUM	NC_016604.1	MYCOBACTERIUM RHODESIAE NBB3, COMPLETE GENOME	MYCOBACTERIUM
-1.37285	AF299301.1	COLIPHAGE PHIX174 ISOLATE CM, COMPLETE GENOME	COLIPHAGE	NC_009654.1	MARINOMONAS SP. MWYL1, COMPLETE GENOME	MARINOMONAS
-1.37228	AF299302.1	COLIPHAGE PHIX174 ISOLATE C, COMPLETE GENOME	COLIPHAGE	NC_009654.1	MARINOMONAS SP. MWYL1, COMPLETE GENOME	MARINOMONAS
-1.36908	AF301375.1	METHANOTHERMOBACTER WOLFEII PROPHAGE PSIM100, COMPLETE GENOME; FLANKED BY METHANOTHERMOBACTER WOLFEII MTW1216 (MTW1216) AND MTW1215 (MTW1215) GENES, COMPLETE CDS	METHANOTHERMOBACTER	NC_000916.1	METHANOTHERMOBACTER THERMAUTOTROPHICUS STR. DELTA H, COMPLETE GENOME	METHANOTHERMOBACTER
-1.32377	AF304433.1	BACTERIOPHAGE TP901-1, COMPLETE SEQUENCE	UNKNOWN	CP006766.1	LACTOCOCCUS LACTIS SUBSP. LACTIS KLDS 4.0325, COMPLETE GENOME	LACTOCOCCUS
-1.38864	AF306496.1	PHAGE PHIMH2K, COMPLETE GENOME	PHAGE	NC_020813.1	BDELLOVIBRIO EXOVORUS JSS, COMPLETE GENOME	BDELLOVIBRIO
-1.36766	AF320576.1	BACTERIOPHAGE FELIX 01, COMPLETE GENOME	UNKNOWN	CP007631.2	STREPTOCOCCUS AGALACTIAE STRAIN NGBS061, COMPLETE GENOME	STREPTOCOCCUS
-1.28745	AF323668.1	BACTERIOPHAGE BIL285, COMPLETE GENOME. [25-AUG-2017]	UNKNOWN	NC_002662.1	LACTOCOCCUS LACTIS SUBSP. LACTIS IL1403 CHROMOSOME, COMPLETE GENOME	LACTOCOCCUS
-1.3261	AF323669.1	BACTERIOPHAGE BIL286, COMPLETE GENOME. [26-MAY-2017]	UNKNOWN	CP009054.1	LACTOCOCCUS LACTIS SUBSP. LACTIS NCDO 2118, COMPLETE GENOME	LACTOCOCCUS
-1.28847	AF323670.1	BACTERIOPHAGE BIL309, COMPLETE GENOME. [25-AUG-2017]	UNKNOWN	NC_002662.1	LACTOCOCCUS LACTIS SUBSP. LACTIS IL1403 CHROMOSOME, COMPLETE GENOME	LACTOCOCCUS
-1.33232	AF323671.1	BACTERIOPHAGE BIL310, COMPLETE GENOME. [26-MAY-2017]	UNKNOWN	CP006766.1	LACTOCOCCUS LACTIS SUBSP. LACTIS KLDS 4.0325, COMPLETE GENOME	LACTOCOCCUS
-1.29962	AF323672.1	BACTERIOPHAGE BIL311, COMPLETE GENOME. [26-MAY-2017]	UNKNOWN	NC_002662.1	LACTOCOCCUS LACTIS SUBSP. LACTIS IL1403 CHROMOSOME, COMPLETE GENOME	LACTOCOCCUS
-1.28558	AF323673.1	BACTERIOPHAGE BIL312, COMPLETE GENOME. [25-AUG-2017]	UNKNOWN	NC_002662.1	LACTOCOCCUS LACTIS SUBSP. LACTIS IL1403 CHROMOSOME, COMPLETE GENOME	LACTOCOCCUS
-1.38554	AF334111.2	BACTERIOPHAGE AP205, COMPLETE GENOME	UNKNOWN	NC_015277.1	SPHINGOBACTERIUM SP. 21, COMPLETE GENOME	SPHINGOBACTERIUM
-1.36508	AF335538.1	BACTERIOPHAGE HK620, COMPLETE GENOME. [25-AUG-2017]	UNKNOWN	CP005998.1	ESCHERICHIA COLI B7A, COMPLETE GENOME	ESCHERICHIA
-1.38737	AF338467.2	SYNECHOCOCCUS PHAGE P60, COMPLETE GENOME	SYNECHOCOCCUS	CP000554.1	PROCHLOROCOCCUS MARINUS STR. MIT 9303, COMPLETE GENOME	PROCHLOROCOCCUS
-1.32584	AF349457.1	LACTOCOCCUS PHAGE UL36, COMPLETE GENOME	LACTOCOCCUS	CP006766.1	LACTOCOCCUS LACTIS SUBSP. LACTIS KLDS 4.0325, COMPLETE GENOME	LACTOCOCCUS
-1.29215	AF396866.1	BACTERIOPHAGE MX8, COMPLETE GENOME. [25-AUG-2017]	UNKNOWN	NC_008095.1	MYXOCOCCUS XANTHUS DK 1622, COMPLETE GENOME	MYXOCOCCUS
-1.35963	AF399011.1	PSEUDOMONAS PHAGE PHIKZ, COMPLETE GENOME. [26-MAY-2017]	PSEUDOMONAS	NC_020164.1	STAPHYLOCOCCUS WARNERI SG1, COMPLETE GENOME	STAPHYLOCOCCUS
-1.37771	AF408636.1	BACTERIOPHAGE PHI-12 P14 (14), P15 (15), CORE PROTEIN P7 (7), RNA-DEPENDENT RNA POLYMERASE P2 (2), NTPASE P4 (4), AND MAJOR CORE STRUCTURAL PROTEIN P1 -1 GENES, COMPLETE CDS. [28-AUG-2015]	UNKNOWN	NC_008009.1	CANDIDATUS KORIBACTER VERSATILIS ELLIN345, COMPLETE GENOME	CANDIDATUS
-1.30507	AF424781.1	STAPHYLOCOCCUS AUREUS PHAGE PHI 11, COMPLETE GENOME. [25-AUG-2017]	STAPHYLOCOCCUS	NC_009641.1	STAPHYLOCOCCUS AUREUS SUBSP. AUREUS STR. NEWMAN DNA, COMPLETE GENOME	STAPHYLOCOCCUS
-1.2934	AF424783.1	STAPHYLOCOCCUS AUREUS PHAGE PHI 13, COMPLETE GENOME. [25-AUG-2017]	STAPHYLOCOCCUS	CP007454.1	STAPHYLOCOCCUS AUREUS STRAIN 502A, COMPLETE GENOME	STAPHYLOCOCCUS
-1.33664	AF428260.1	PROPIONIBACTERIUM PHAGE PHIB5, COMPLETE GENOME. [26-MAY-2017]	PROPIONIBACTERIUM	NC_015564.1	HOYOSELLA SUBFLAVA DQS3-9A1, COMPLETE GENOME	HOYOSELLA
-1.34167	AF440571.2	SULFOLOBUS ISLANDICUS FILAMENTOUS VIRUS, PARTIAL GENOME	SULFOLOBUS	CP010577.1	BACILLUS THURINGIENSIS SEROVAR MORRISONI STRAIN BGSC 4AA1, COMPLETE GENOME	BACILLUS
-1.30406	AF440695.1	VIRUS PHICH1, COMPLETE GENOME	VIRUS	NC_021313.1	SALINARCHAEUM SP. HARCHT-BSK1, COMPLETE GENOME	SALINARCHAEUM
-1.31984	AF447491.1	BACTERIOPHAGE PHIE125, COMPLETE GENOME. [25-AUG-2017]	UNKNOWN	CP000124.1	BURKHOLDERIA PSEUDOMALLEI 1710B CHROMOSOME I, COMPLETE SEQUENCE	BURKHOLDERIA
-1.32532	AF448724.1	SINORHIZOBIUM MELILOTI PHAGE PBC5, COMPLETE GENOME. [26-MAY-2017]	SINORHIZOBIUM	NC_018000.1	SINORHIZOBIUM FREDII USDA 257, COMPLETE GENOME	SINORHIZOBIUM
-1.37222	AF452449.2	BACTERIOPHAGE VSKK, COMPLETE GENOME. [13-NOV-2015]	UNKNOWN	CP008920.1	PROVIDENCIA STUARTII STRAIN ATCC 33672, COMPLETE GENOME	PROVIDENCIA
-1.37431	AF453500.3	VIBRIO PHAGE VSK, COMPLETE GENOME. [13-NOV-2015]	VIBRIO	NC_015276.1	MARINOMONAS MEDITERRANEA MMB-1, COMPLETE GENOME	MARINOMONAS
-1.32574	AF489521.1	LACTOCOCCUS BACTERIOPHAGE 4268, COMPLETE GENOME	LACTOCOCCUS	CP009054.1	LACTOCOCCUS LACTIS SUBSP. LACTIS NCDO 2118, COMPLETE GENOME	LACTOCOCCUS
-1.36022	AF493143.1	PSEUDOMONAS PHAGE GH-1, COMPLETE SEQUENCE. [26-MAY-2017]	PSEUDOMONAS	NC_016631.1	GRANULICELLA MALLENSIS MP5ACTX8, COMPLETE GENOME	GRANULICELLA
-1.29862	AF513032.1	STAPHYLOCOCCUS PHAGE PHI44AHJD, COMPLETE GENOME	STAPHYLOCOCCUS	CP007447.1	STAPHYLOCOCCUS AUREUS STRAIN XN108, COMPLETE GENOME	STAPHYLOCOCCUS
-1.29596	AF513033.1	STAPHYLOCOCCUS AUREUS PHAGE PHIP68, COMPLETE GENOME	STAPHYLOCOCCUS	CP007447.1	STAPHYLOCOCCUS AUREUS STRAIN XN108, COMPLETE GENOME	STAPHYLOCOCCUS
-1.35854	AF527608.1	BACTERIOPHAGE P22-PBI, COMPLETE SEQUENCE. [25-AUG-2017]	UNKNOWN	NC_011083.1	SALMONELLA ENTERICA SUBSP. ENTERICA SEROVAR HEIDELBERG STR. SL476, COMPLETE GENOME	SALMONELLA
-1.29927	AF543311.2	BURKHOLDERIA CEPACIA PHAGE BCEP781, COMPLETE GENOME	BURKHOLDERIA	CP011301.1	BURKHOLDERIA CEPACIA STRAIN LO6, COMPLETE GENOME	BURKHOLDERIA
-1.28158	AF547430.1	MYCOBACTERIUM PHAGE PG1, COMPLETE GENOME	MYCOBACTERIUM	NC_018289.1	MYCOBACTERIUM SMEGMATIS STR. MC2 155, COMPLETE GENOME	MYCOBACTERIUM
-1.35782	AF547987.1	ENTEROBACTERIA PHAGE SF6, COMPLETE GENOME. [25-AUG-2017]	ENTEROBACTERIA	CP005998.1	ESCHERICHIA COLI B7A, COMPLETE GENOME	ESCHERICHIA
-1.34282	AJ131519.1	LACTOBACILLUS BACTERIOPHAGE PHI ADH COMPLETE GENOME [25-AUG-2017]	LACTOBACILLUS	NC_005362.1	LACTOBACILLUS JOHNSONII NCC 533, COMPLETE GENOME	LACTOBACILLUS
-1.32462	AJ242593.1	BACTERIOPHAGE A118 COMPLETE GENOME [25-AUG-2017]	UNKNOWN	HG813249.1	LISTERIA MONOCYTOGENES 6179 CHROMOSOME SEQUENCE	LISTERIA
-1.36701	AJ251789.2	LACTOBACILLUS CASEI BACTERIOPHAGE A2 COMPLETE GENOME	LACTOBACILLUS	AP012541.1	LACTOBACILLUS PARACASEI SUBSP. PARACASEI JCM 8130 DNA, COMPLETE GENOME	LACTOBACILLUS
-1.3968	AJ251805.1	BACTERIOPHAGE PHIYEO3-12 COMPLETE GENOME [25-AUG-2017]	UNKNOWN	NC_014008.1	CORALIOMARGARITA AKAJIMENSIS DSM 45221, COMPLETE GENOME	CORALIOMARGARITA
-1.36705	AJ270057.1	CHLAMYDIA PHAGE 2 DNA, COMPLETE GENOME [29-AUG-2014]	CHLAMYDIA	NC_018068.1	DESULFOSPOROSINUS ACIDIPHILUS SJ4, COMPLETE GENOME	DESULFOSPOROSINUS
-1.39621	AJ278322.4	CORYNEBACTERIUM PHAGE BFK20 [25-AUG-2017]	CORYNEBACTERIUM	CP007003.1	TRUEPERELLA PYOGENES TP8, COMPLETE GENOME	TRUEPERELLA
-1.35726	AJ298298.1	BACTERIOPHAGE P27 COMPLETE GENOME [25-AUG-2017]	UNKNOWN	NC_017641.1	ESCHERICHIA COLI UMNK88, COMPLETE GENOME	ESCHERICHIA
-1.3044	AJ302074.2	STREPTOCOCCUS PNEUMONIAE BACTERIOPHAGE MM1 COMPLETE GENOME [25-AUG-2017]	STREPTOCOCCUS	NC_010380.1	STREPTOCOCCUS PNEUMONIAE HUNGARY19A-6, COMPLETE GENOME	STREPTOCOCCUS
-1.30846	AJ304858.2	BACTERIOPHAGE CP-1639 AND CHROMOSOMAL INTEGRATION SITE	UNKNOWN	NC_013364.1	ESCHERICHIA COLI O111:H- STR. 11128 DNA, COMPLETE GENOME	ESCHERICHIA
-1.31828	AJ312240.2	BACTERIOPHAGE PSA COMPLETE GENOME [26-MAY-2017]	UNKNOWN	NC_021829.2	LISTERIA MONOCYTOGENES J1-220, COMPLETE GENOME	LISTERIA
-1.39917	AJ318471.1	BACTERIOPHAGE T3 COMPLETE GENOME, STRAIN LURIA [25-AUG-2017]	UNKNOWN	CP003241.1	VIBRIO SP. EJY3 CHROMOSOME 1, COMPLETE SEQUENCE	VIBRIO
-1.2587	AJ344259.1	SULFOLOBUS VIRUS SIRV-2 GENOMIC DNA	SULFOLOBUS	NC_022571.1	CLOSTRIDIUM SACCHAROBUTYLICUM DSM 13864, COMPLETE GENOME	CLOSTRIDIUM
-1.25769	AJ414696.1	SULFOLOBUS VIRUS SIRV-1 COMPLETE VIRAL GENOME	SULFOLOBUS	NC_020291.1	CLOSTRIDIUM SACCHAROPERBUTYLACETONICUM N1-4(HMT), COMPLETE GENOME	CLOSTRIDIUM
-1.3382	AJ505558.1	BACTERIOPHAGE PHIKMV COMPLETE GENOME [26-MAY-2017]	UNKNOWN	NC_022738.1	PSEUDOMONAS SP. VLB120, COMPLETE GENOME	PSEUDOMONAS
-1.34464	AJ550940.2	BACTERIOPHAGE PHI-BT1 COMPLETE GENOME [25-AUG-2017]	UNKNOWN	NC_015564.1	HOYOSELLA SUBFLAVA DQS3-9A1, COMPLETE GENOME	HOYOSELLA
-1.31912	AJ556162.1	PHAGE BP-4795 COMPLETE GENOME [25-AUG-2017]	PHAGE	NC_013364.1	ESCHERICHIA COLI O111:H- STR. 11128 DNA, COMPLETE GENOME	ESCHERICHIA
-1.36113	AJ560763.1	BACTERIOPHAGE AAPHI23 COMPLETE GENOME	UNKNOWN	NC_012913.1	AGGREGATIBACTER APHROPHILUS NJ8700, COMPLETE GENOME	AGGREGATIBACTER
-1.37535	AJ564013.1	BACTERIOPHAGE PY54 COMPLETE GENOME	UNKNOWN	CP009364.1	YERSINIA FREDERIKSENII Y225, COMPLETE GENOME	YERSINIA
-1.36042	AJ567472.1	ACIDIANUS FILAMENTUS VIRUS 1 COMPLETE GENOME	ACIDIANUS	NC_016791.1	CLOSTRIDIUM SP. BNL1100, COMPLETE GENOME	CLOSTRIDIUM
-1.35978	AJ609634.1	BACTERIOPHAGE EJ-1 PROVIRAL DNA, COMPLETE GENOME	UNKNOWN	NC_018594.1	STREPTOCOCCUS PNEUMONIAE SPNA45, COMPLETE GENOME	STREPTOCOCCUS
-1.3535	AJ630128.1	BACTERIOPHAGE S-PM2 COMPLETE GENOME [25-AUG-2017]	UNKNOWN	NC_010001.1	LACHNOCLOSTRIDIUM PHYTOFERMENTANS ISDG, COMPLETE GENOME	LACHNOCLOSTRIDIUM
-1.39022	AJ635161.1	PYROBACULUM SPHERICAL VIRUS COMPLETE GENOME	PYROBACULUM	NC_008701.1	PYROBACULUM ISLANDICUM DSM 4184, COMPLETE GENOME	PYROBACULUM
-1.39706	AJ697969.1	PSEUDOMONAS PHAGE PHIEL COMPLETE GENOME [26-MAY-2017]	PSEUDOMONAS	CP007142.1	GYNUELLA SUNSHINYII YC6258, COMPLETE GENOME	GYNUELLA
-1.34847	AJ783769.1	SULFOLOBUS TENGCHONGENSIS SPINDLE-SHAPED VIRUS STSV1 COMPLETE GENOME	SULFOLOBUS	NC_003106.2	SULFOLOBUS TOKODAII STR. 7 DNA, COMPLETE GENOME	SULFOLOBUS
-1.30309	AJ842011.2	BACTERIOPHAGE 11B COMPLETE GENOME [25-AUG-2017]	UNKNOWN	CP009239.1	CELLULOPHAGA LYTICA STRAIN HI1, COMPLETE GENOME	CELLULOPHAGA
-1.35388	AJ854042.1	ACIDIANUS FILAMENTOUS VIRUS 2, PARTIAL GENOME	ACIDIANUS	NC_021670.1	STAPHYLOCOCCUS AUREUS BMB9393, COMPLETE GENOME	STAPHYLOCOCCUS
-1.37251	AJ875026.1	ACIDIANUS ROD-SHAPED VIRUS 1, COMPLETE VIRAL GENOME	ACIDIANUS	NC_020514.1	PARAGLACIECOLA PSYCHROPHILA 170, COMPLETE GENOME	PARAGLACIECOLA
-1.38034	AJ888457.1	ACIDIANUS TWO-TAILED VIRUS, COMPLETE VIRAL GENOME	ACIDIANUS	CP010976.1	PAENIBACILLUS SP. IHBB 10380, COMPLETE GENOME	PAENIBACILLUS
-1.32808	AJ972879.2	YERSINIA PHAGE PHIR1-37 COMPLETE GENOME	YERSINIA	NC_014393.1	CLOSTRIDIUM CELLULOVORANS 743B, COMPLETE GENOME	CLOSTRIDIUM
-1.33657	AM040673.1	PHAGE PHISMA9 VIRAL ZOT GENE, RSTA GENE (PARTIAL), AND ORF1-5 [25-AUG-2017]	PHAGE	CP009040.1	XANTHOMONAS CITRI SUBSP. CITRI STRAIN AW16, COMPLETE GENOME	XANTHOMONAS
-1.40003	AM084414.1	ENTEROBACTERIA PHAGE K1F, COMPLETE GENOME. [25-AUG-2017]	ENTEROBACTERIA	CP002122.1	PREVOTELLA MELANINOGENICA ATCC 25845 CHROMOSOME I, COMPLETE SEQUENCE	PREVOTELLA
-1.38597	AM084415.1	ENTEROBACTERIA PHAGE K1E, COMPLETE GENOME. [26-MAY-2017]	ENTEROBACTERIA	CP009281.1	PAENIBACILLUS SP. FSL R5-0345, COMPLETE GENOME	PAENIBACILLUS
-1.3609	AM087120.2	ACIDIANUS FILAMENTOUS VIRUS 3, PARTIAL VIRAL GENOME	ACIDIANUS	CP008712.1	BACILLUS CEREUS STRAIN FT9, COMPLETE GENOME	BACILLUS
-1.36024	AM087121.2	ACIDIANUS FILAMENTOUS VIRUS 6, PARTIAL VIRAL GENOME	ACIDIANUS	NC_014829.1	BACILLUS CELLULOSILYTICUS DSM 2522, COMPLETE GENOME	BACILLUS
-1.36078	AM087123.2	ACIDIANUS FILAMENTOUS VIRUS 8, PARTIAL VIRAL GENOME	ACIDIANUS	CP008712.1	BACILLUS CEREUS STRAIN FT9, COMPLETE GENOME	BACILLUS
-1.38245	AM156909.1	BACTERIOPHAGE RTP, COMPLETE GENOME [25-AUG-2017]	UNKNOWN	NC_013166.1	KANGIELLA KOREENSIS DSM 16069, COMPLETE GENOME	KANGIELLA
-1.39381	AM183667.1	BACTERIOPHAGE BERLIN COMPLETE GENOME [25-AUG-2017]	UNKNOWN	CP002122.1	PREVOTELLA MELANINOGENICA ATCC 25845 CHROMOSOME I, COMPLETE SEQUENCE	PREVOTELLA
-1.34115	AM265638.1	BACTERIOPHAGE LKD16 COMPLETE GENOME, SPECIFIC HOST PSEUDOMONAS AERUGINOSA [26-MAY-2017]	PSEUDOMONAS	NC_022738.1	PSEUDOMONAS SP. VLB120, COMPLETE GENOME	PSEUDOMONAS
-1.363	AM265639.1	PSEUDOMONAS PHAGE LKA1 COMPLETE GENOME, SPECIFIC HOST PSEUDOMONAS AERUGINOSA [26-MAY-2017]	PSEUDOMONAS	NC_022738.1	PSEUDOMONAS SP. VLB120, COMPLETE GENOME	PSEUDOMONAS
-1.28718	AM419438.1	ARCHAEAL BJ1 VIRUS COMPLETE GENOME	ARCHAEAL	NC_021313.1	SALINARCHAEUM SP. HARCHT-BSK1, COMPLETE GENOME	SALINARCHAEUM
-1.37242	AM491472.1	SALMONELLA PHAGE E1 COMPLETE GENOME [25-AUG-2017]	SALMONELLA	NC_018658.1	ESCHERICHIA COLI O104:H4 STR. 2011C-3493 CHROMOSOME, COMPLETE GENOME	ESCHERICHIA
-1.35946	AM749121.1	STREPTOCOCCUS PHAGE M102 COMPLETE GENOME	STREPTOCOCCUS	NC_013798.1	STREPTOCOCCUS GALLOLYTICUS UCN34 COMPLETE GENOME	STREPTOCOCCUS
-1.31578	AM749441.1	PSEUDOMONAS PHAGE YUA, COMPLETE GENOME [26-MAY-2017]	PSEUDOMONAS	NC_014623.1	STIGMATELLA AURANTIACA DW4/3-1, COMPLETE GENOME	STIGMATELLA
-1.39692	AM910650.1	PSEUDOMONAS PHAGE LUZ24, COMPLETE GENOME [25-AUG-2017]	PSEUDOMONAS	NC_015152.1	SPHAEROCHAETA GLOBOSA STR. BUDDY, COMPLETE GENOME	SPHAEROCHAETA
-1.33948	AM910651.1	PSEUDOMONAS PHAGE LUZ19, COMPLETE GENOME [26-MAY-2017]	PSEUDOMONAS	NC_022738.1	PSEUDOMONAS SP. VLB120, COMPLETE GENOME	PSEUDOMONAS
-1.33081	AP000363.1	ENTEROBACTERIA PHAGE VT2-SAKAI PROVIRAL DNA, COMPLETE GENOME. [26-MAY-2017]	ENTEROBACTERIA	NC_002695.1	ESCHERICHIA COLI O157:H7 STR. SAKAI, COMPLETE GENOME	ESCHERICHIA
-1.3276	AP000422.1	ENTEROBACTERIA PHAGE VT2-SAKAI GENOMIC DNA, PROPHAGE INSERTED REGION IN ESCHERICHIA COLI O157:H7	ENTEROBACTERIA	NC_002695.1	ESCHERICHIA COLI O157:H7 STR. SAKAI, COMPLETE GENOME	ESCHERICHIA
-1.31503	AP001553.1	STAPHYLOCOCCUS PHAGE PHIETA DNA, COMPLETE GENOME. [26-MAY-2017]	STAPHYLOCOCCUS	NC_009632.1	STAPHYLOCOCCUS AUREUS SUBSP. AUREUS JH1, COMPLETE GENOME	STAPHYLOCOCCUS
-1.33265	AP004402.1	STX2 CONVERTING PHAGE I DNA, COMPLETE GENOME. [26-MAY-2017]	ESCHERICHIA	CP008957.1	ESCHERICHIA COLI O157:H7 STR. EDL933, COMPLETE GENOME	ESCHERICHIA
-1.33166	AP005153.1	STX1 CONVERTING PHAGE DNA, COMPLETE GENOME. [26-MAY-2017]	ESCHERICHIA	NC_002695.1	ESCHERICHIA COLI O157:H7 STR. SAKAI, COMPLETE GENOME	ESCHERICHIA
-1.32765	AP005154.1	STX2 CONVERTING PHAGE II DNA, COMPLETE GENOME. [26-MAY-2017]	ESCHERICHIA	NC_002695.1	ESCHERICHIA COLI O157:H7 STR. SAKAI, COMPLETE GENOME	ESCHERICHIA
-1.30476	AP008953.1	STAPHYLOCOCCUS PHAGE PHIETA2 DNA, COMPLETE GENOME, STRAIN: TY94. [25-AUG-2017]	STAPHYLOCOCCUS	NC_009632.1	STAPHYLOCOCCUS AUREUS SUBSP. AUREUS JH1, COMPLETE GENOME	STAPHYLOCOCCUS
-1.31288	AP008954.1	STAPHYLOCOCCUS PHAGE PHIETA3 DNA, COMPLETE GENOME, STRAIN: TY32. [26-MAY-2017]	STAPHYLOCOCCUS	NC_009641.1	STAPHYLOCOCCUS AUREUS SUBSP. AUREUS STR. NEWMAN DNA, COMPLETE GENOME	STAPHYLOCOCCUS
-1.26861	AP008983.1	CLOSTRIDIUM PHAGE C-ST GENOMIC DNA, COMPLETE GENOME. [25-AUG-2017]	CLOSTRIDIUM	NC_009617.1	CLOSTRIDIUM BEIJERINCKII NCIMB 8052, COMPLETE GENOME	CLOSTRIDIUM
-1.35075	AP008986.1	XANTHOMONAS ORYZAE PHAGE OP2 DNA, COMPLETE GENOME. [25-AUG-2017]	XANTHOMONAS	CP010518.3	PANDORAEA APISTA STRAIN TF81F4, COMPLETE GENOME	PANDORAEA
-1.37093	AP009146.1	SODALIS PHAGE PHISG1 DNA, COMPLETE GENOME. [25-AUG-2017]	SODALIS	NC_013592.1	DICKEYA ZEAE ECH586, COMPLETE GENOME	DICKEYA
-1.34671	AP009390.1	ENTEROCOCCUS PHAGE PHIEF24C DNA, COMPLETE GENOME. [25-AUG-2017]	ENTEROCOCCUS	NC_015275.1	CLOSTRIDIUM LENTOCELLUM DSM 5427, COMPLETE GENOME	CLOSTRIDIUM
-1.36963	AP009624.1	PSEUDOMONAS PHAGE PAJU2 DNA, COMPLETE GENOME. [25-AUG-2017]	PSEUDOMONAS	NC_016631.1	GRANULICELLA MALLENSIS MP5ACTX8, COMPLETE GENOME	GRANULICELLA
-1.34386	AP011113.1	ENTEROBACTERIA PHAGE AR1 DNA, COMPLETE GENOME. [25-AUG-2017]	ENTEROBACTERIA	CP007447.1	STAPHYLOCOCCUS AUREUS STRAIN XN108, COMPLETE GENOME	STAPHYLOCOCCUS
-1.32013	AP011617.1	THERMUS PHAGE TMA DNA, COMPLETE GENOME. [26-MAY-2017]	THERMUS	NC_014393.1	CLOSTRIDIUM CELLULOVORANS 743B, COMPLETE GENOME	CLOSTRIDIUM
-1.3127	AP011955.1	STAPHYLOCOCCUS PHAGE PHI5967PVL DNA, COMPLETE GENOME. [26-MAY-2017]	STAPHYLOCOCCUS	CP007447.1	STAPHYLOCOCCUS AUREUS STRAIN XN108, COMPLETE GENOME	STAPHYLOCOCCUS
-1.31263	AP011956.1	STAPHYLOCOCCUS PHAGE PHI7247PVL DNA, COMPLETE GENOME. [26-MAY-2017]	STAPHYLOCOCCUS	CP007447.1	STAPHYLOCOCCUS AUREUS STRAIN XN108, COMPLETE GENOME	STAPHYLOCOCCUS
-1.29741	AP012341.1	STAPHYLOCOCCUS PHAGE PHI7401PVL DNA, COMPLETE GENOME. [26-MAY-2017]	STAPHYLOCOCCUS	NC_017342.1	STAPHYLOCOCCUS AUREUS SUBSP. AUREUS TCH60, COMPLETE GENOME	STAPHYLOCOCCUS
-1.33529	AP012529.1	STX2-CONVERTING PHAGE STX2A_F403 PROVIRAL DNA, COMPLETE GENOME	ESCHERICHIA	CP008957.1	ESCHERICHIA COLI O157:H7 STR. EDL933, COMPLETE GENOME	ESCHERICHIA
-1.31991	AP012530.1	STX2-CONVERTING PHAGE STX2A_F349 PROVIRAL DNA, COMPLETE GENOME	ESCHERICHIA	NC_002695.1	ESCHERICHIA COLI O157:H7 STR. SAKAI, COMPLETE GENOME	ESCHERICHIA
-1.32794	AP012531.1	STX2-CONVERTING PHAGE STX2A_F422 PROVIRAL DNA, COMPLETE GENOME	ESCHERICHIA	CP008957.1	ESCHERICHIA COLI O157:H7 STR. EDL933, COMPLETE GENOME	ESCHERICHIA
-1.33581	AP012532.1	STX2-CONVERTING PHAGE STX2A_F451 PROVIRAL DNA, COMPLETE GENOME	ESCHERICHIA	CP008957.1	ESCHERICHIA COLI O157:H7 STR. EDL933, COMPLETE GENOME	ESCHERICHIA
-1.3355	AP012533.1	STX2-CONVERTING PHAGE STX2A_F723 PROVIRAL DNA, COMPLETE GENOME	ESCHERICHIA	NC_013364.1	ESCHERICHIA COLI O111:H- STR. 11128 DNA, COMPLETE GENOME	ESCHERICHIA
-1.34014	AP012534.1	STX2-CONVERTING PHAGE STX2A_F765 PROVIRAL DNA, COMPLETE GENOME	ESCHERICHIA	NC_013364.1	ESCHERICHIA COLI O111:H- STR. 11128 DNA, COMPLETE GENOME	ESCHERICHIA
-1.32909	AP012535.1	STX2-CONVERTING PHAGE STX2A_WGPS9 PROVIRAL DNA, COMPLETE GENOME	ESCHERICHIA	NC_013364.1	ESCHERICHIA COLI O111:H- STR. 11128 DNA, COMPLETE GENOME	ESCHERICHIA
-1.32555	AP012538.1	STX2-CONVERTING PHAGE STX2A_WGPS4 PROVIRAL DNA, COMPLETE GENOME	ESCHERICHIA	NC_013361.1	ESCHERICHIA COLI O26:H11 STR. 11368 DNA, COMPLETE GENOME	ESCHERICHIA
-1.3829	AP013029.1	BACILLUS PHAGE PHINIT1 DNA, COMPLETE GENOME. [25-AUG-2017]	BACILLUS	CP009281.1	PAENIBACILLUS SP. FSL R5-0345, COMPLETE GENOME	PAENIBACILLUS
-1.38888	AP013057.1	EDWARDSIELLA PHAGE PEI21 DNA, COMPLETE GENOME. [25-AUG-2017]	EDWARDSIELLA	CP007557.1	CITROBACTER FREUNDII CFNIH1, COMPLETE GENOME	CITROBACTER
-1.38217	AP013362.1	UNCULTURED MEDITERRANEAN PHAGE UVMED DNA, COMPLETE GENOME, GROUP G11,ISOLATE:UVMED-CGR-C52A-MEDDCM-OCT-S24-C15.	UNKNOWN	NC_020304.1	DESULFOCAPSA SULFEXIGENS DSM 10523, COMPLETE GENOME	DESULFOCAPSA
-1.38444	AP013365.1	UNCULTURED MEDITERRANEAN PHAGE UVMED DNA, COMPLETE GENOME, GROUP G11,ISOLATE:UVMED-CGR-C52A-MEDDCM-OCT-S38-C20.	UNKNOWN	NC_009925.1	ACARYOCHLORIS MARINA MBIC11017, COMPLETE GENOME	ACARYOCHLORIS
-1.38436	AP013366.1	UNCULTURED MEDITERRANEAN PHAGE UVMED DNA, COMPLETE GENOME, GROUP G11,ISOLATE:UVMED-CGR-C52A-MEDDCM-OCT-S42-C25.	UNKNOWN	NC_009925.1	ACARYOCHLORIS MARINA MBIC11017, COMPLETE GENOME	ACARYOCHLORIS
-1.33745	AP013391.1	UNCULTURED MEDITERRANEAN PHAGE UVMED DNA, COMPLETE GENOME, GROUP G15,ISOLATE:UVMED-CGR-C6A-MEDDCM-OCT-S33-C54.	UNKNOWN	NC_015275.1	CLOSTRIDIUM LENTOCELLUM DSM 5427, COMPLETE GENOME	CLOSTRIDIUM
-1.33776	AP013392.1	UNCULTURED MEDITERRANEAN PHAGE UVMED DNA, COMPLETE GENOME, GROUP G15,ISOLATE:UVMED-CGR-C6A-MEDDCM-OCT-S43-C64.	UNKNOWN	NC_015275.1	CLOSTRIDIUM LENTOCELLUM DSM 5427, COMPLETE GENOME	CLOSTRIDIUM
-1.34723	AP013414.1	UNCULTURED MEDITERRANEAN PHAGE UVMED DNA, COMPLETE GENOME, GROUP G16,ISOLATE:UVMED-CGR-C48A-MEDDCM-OCT-S29-C21.	UNKNOWN	NC_014393.1	CLOSTRIDIUM CELLULOVORANS 743B, COMPLETE GENOME	CLOSTRIDIUM
-1.3471	AP013415.1	UNCULTURED MEDITERRANEAN PHAGE UVMED DNA, COMPLETE GENOME, GROUP G16,ISOLATE:UVMED-CGR-C48A-MEDDCM-OCT-S37-C22.	UNKNOWN	NC_014393.1	CLOSTRIDIUM CELLULOVORANS 743B, COMPLETE GENOME	CLOSTRIDIUM
-1.30301	AP013497.1	UNCULTURED MEDITERRANEAN PHAGE UVMED DNA, COMPLETE GENOME, GROUP G19,ISOLATE:UVMED-CGR-C68A-MEDDCM-OCT-S35-C79.	UNKNOWN	NC_020291.1	CLOSTRIDIUM SACCHAROPERBUTYLACETONICUM N1-4(HMT), COMPLETE GENOME	CLOSTRIDIUM
-1.30309	AP013498.1	UNCULTURED MEDITERRANEAN PHAGE UVMED DNA, COMPLETE GENOME, GROUP G19,ISOLATE:UVMED-CGR-C68A-MEDDCM-OCT-S38-C76.	UNKNOWN	NC_014393.1	CLOSTRIDIUM CELLULOVORANS 743B, COMPLETE GENOME	CLOSTRIDIUM
-1.38185	AP014629.1	EDWARDSIELLA PHAGE GF-2 DNA, COMPLETE SEQUENCE	EDWARDSIELLA	NC_013421.1	PECTOBACTERIUM PARMENTIERI WPP163, COMPLETE GENOME	PECTOBACTERIUM
-1.34656	AP014684.1	PSEUDOMONAS PHAGE PS-1 DNA, COMPLETE SEQUENCE	PSEUDOMONAS	CP007441.1	PSEUDOMONAS STUTZERI STRAIN 28A24, COMPLETE GENOME	PSEUDOMONAS
-1.37116	AP014693.1	RALSTONIA PHAGE RSL2 DNA, COMPLETE SEQUENCE	RALSTONIA	NC_008009.1	CANDIDATUS KORIBACTER VERSATILIS ELLIN345, COMPLETE GENOME	CANDIDATUS
-1.3724	AP014714.1	EDWARDSIELLA PHAGE PEI20 DNA, COMPLETE SEQUENCE	EDWARDSIELLA	CP002522.2	ACINETOBACTER BAUMANNII TCDC-AB0715, COMPLETE GENOME	ACINETOBACTER
-1.37021	AP014927.1	RALSTONIA PHAGE RSF1 DNA, COMPLETE GENOME	RALSTONIA	NC_008009.1	CANDIDATUS KORIBACTER VERSATILIS ELLIN345, COMPLETE GENOME	CANDIDATUS
-1.37394	AP017924.1	RALSTONIA PHAGE RP12 DNA, COMPLETE GENOME	RALSTONIA	NC_016631.1	GRANULICELLA MALLENSIS MP5ACTX8, COMPLETE GENOME	GRANULICELLA
-1.37417	AP017925.1	RALSTONIA PHAGE RP31 DNA, COMPLETE GENOME	RALSTONIA	NC_016631.1	GRANULICELLA MALLENSIS MP5ACTX8, COMPLETE GENOME	GRANULICELLA
-1.27074	AP018462.1	MYCOBACTERIUM PHAGE D12 DNA, COMPLETE GENOME	MYCOBACTERIUM	CP003949.1	RHODOCOCCUS OPACUS PD630, COMPLETE GENOME	RHODOCOCCUS
-1.36907	AX059140.1	SEQUENCE 1 FROM PATENT WO0075335. [30-MAY-2014]	UNKNOWN	NC_004663.1	BACTEROIDES THETAIOTAOMICRON VPI-5482 CHROMOSOME, COMPLETE GENOME	BACTEROIDES
-1.35893	AY007505.3	STREPTOCOCCUS MITIS PHAGE SM1,COMPLETE GENOME	STREPTOCOCCUS	NC_018594.1	STREPTOCOCCUS PNEUMONIAE SPNA45, COMPLETE GENOME	STREPTOCOCCUS
-1.28942	AY027935.1	HAEMOPHILUS INFLUENZAE PHAGE HP2, COMPLETE GENOME. [25-AUG-2017]	HAEMOPHILUS	NC_017451.1	HAEMOPHILUS INFLUENZAE R2866, COMPLETE GENOME	HAEMOPHILUS
-1.28237	AY029185.2	BORDETELLA PHAGE BPP-1, COMPLETE GENOME	BORDETELLA	NC_014640.1	ACHROMOBACTER XYLOSOXIDANS A8, COMPLETE GENOME	ACHROMOBACTER
-1.37165	AY034425.1	BACTERIOPHAGE PHI-12 NUCLEOCAPSID PROTEIN P8, MORPHOGENETIC PROTEIN P12, MEMBRANE PROTEIN P9, AND MURAMIDASE GENES, COMPLETE CDS. [26-MAY-2017]	UNKNOWN	NC_008009.1	CANDIDATUS KORIBACTER VERSATILIS ELLIN345, COMPLETE GENOME	CANDIDATUS
-1.36992	AY039807.1	BACTERIOPHAGE PHI-12 MEMBRANE PROTEIN P10 (10), MEMBRANE PROTEIN P6 (6), HOST ATTACHMENT PROTEIN P3A (3A), HOST ATTACHMENT PROTEIN P3B (3B), AND P3C (3C) GENES, COMPLETE CDS. [13-NOV-2015]	UNKNOWN	NC_014963.1	TERRIGLOBUS SAANENSIS SP1PR4, COMPLETE GENOME	TERRIGLOBUS
-1.31773	AY048850.1	NATRINEMA VIRUS SNJ1, COMPLETE GENOME	NATRINEMA	NC_019792.1	NATRONOBACTERIUM GREGORYI SP2, COMPLETE GENOME	NATRONOBACTERIUM
-1.28466	AY050245.2	STREPTOCOCCUS PYOGENES STRAIN NIH1 PUTATIVE METHIONINE SULFOXIDE REDUCTASE GENE, COMPLETE CDS; AND INTEGRATED TEMPERATE PHAGE PHINIH1.1, COMPLETE GENOME. [25-AUG-2017]	STREPTOCOCCUS	CP007041.1	STREPTOCOCCUS PYOGENES STAB902, COMPLETE GENOME	STREPTOCOCCUS
-1.34741	AY052766.1	SALMONELLA TYPHIMURIUM BACTERIOPHAGE ST64T, COMPLETE GENOME	SALMONELLA	CP007534.1	SALMONELLA ENTERICA SUBSP. ENTERICA SEROVAR ABONY STR. 0014, COMPLETE GENOME	SALMONELLA
-1.34542	AY055382.1	SALMONELLA TYPHIMURIUM PHAGE ST64B COMPLETE SEQUENCE. [25-AUG-2017]	SALMONELLA	NC_021814.1	SALMONELLA ENTERICA SUBSP. ENTERICA SEROVAR TYPHIMURIUM VAR. 5- STR. CFSAN001921, COMPLETE GENOME	SALMONELLA
-1.39698	AY078382.2	PSEUDOMONAS AERUGINOSA PHAGE PAP3, COMPLETE GENOME. [25-AUG-2017]	PSEUDOMONAS	NC_015152.1	SPHAEROCHAETA GLOBOSA STR. BUDDY, COMPLETE GENOME	SPHAEROCHAETA
-1.26257	AY082070.1	BACTERIOPHAGE PHI3626, COMPLETE GENOME. [25-AUG-2017]	UNKNOWN	NC_020291.1	CLOSTRIDIUM SACCHAROPERBUTYLACETONICUM N1-4(HMT), COMPLETE GENOME	CLOSTRIDIUM
-1.39868	AY095314.2	VIBRIOPHAGE VPV262, COMPLETE GENOME. [25-AUG-2017]	VIBRIO	CP003241.1	VIBRIO SP. EJY3 CHROMOSOME 1, COMPLETE SEQUENCE	VIBRIO
-1.34354	AY129330.1	MYCOBACTERIUM VIRUS CHE8, COMPLETE GENOME	MYCOBACTERIUM	NC_015564.1	HOYOSELLA SUBFLAVA DQS3-9A1, COMPLETE GENOME	HOYOSELLA
-1.33249	AY129331.1	MYCOBACTERIOPHAGE CJW1, COMPLETE GENOME. [25-AUG-2017]	MYCOBACTERIUM	CP009615.1	MYCOBACTERIUM ABSCESSUS STRAIN DJO-44274, COMPLETE GENOME	MYCOBACTERIUM
-1.31434	AY129332.2	MYCOBACTERIUM VIRUS BXZ2, COMPLETE GENOME	MYCOBACTERIUM	NC_016604.1	MYCOBACTERIUM RHODESIAE NBB3, COMPLETE GENOME	MYCOBACTERIUM
-1.29744	AY129333.1	MYCOBACTERIUM PHAGE CHE9C, COMPLETE SEQUENCE. [25-AUG-2017]	MYCOBACTERIUM	NC_018289.1	MYCOBACTERIUM SMEGMATIS STR. MC2 155, COMPLETE GENOME	MYCOBACTERIUM
-1.25922	AY129334.1	MYCOBACTERIOPHAGE ROSEBUSH, COMPLETE GENOME. [25-AUG-2017]	MYCOBACTERIUM	NC_021191.1	ACTINOPLANES SP. N902-109, COMPLETE GENOME	ACTINOPLANES
-1.29339	AY129335.1	MYCOBACTERIOPHAGE CORNDOG, COMPLETE GENOME. [25-AUG-2017]	MYCOBACTERIUM	NC_008726.1	MYCOBACTERIUM VANBAALENII PYR-1, COMPLETE GENOME	MYCOBACTERIUM
-1.34505	AY129336.2	MYCOBACTERIOPHAGE CHE9D, COMPLETE GENOME. [26-JUL-2017]	MYCOBACTERIUM	AP014547.1	MYCOBACTERIUM ABSCESSUS SUBSP. BOLLETII CCUG 48898 = JCM 15300 DNA, COMPLETE GENOME	MYCOBACTERIUM
-1.29705	AY129337.1	MYCOBACTERIOPHAGE BXZ1, COMPLETE GENOME. [25-AUG-2017]	MYCOBACTERIUM	CP009914.1	MYCOBACTERIUM SP. VKM AC-1817D, COMPLETE GENOME	MYCOBACTERIUM
-1.3478	AY129338.1	MYCOBACTERIOPHAGE OMEGA, COMPLETE SEQUENCE. [25-AUG-2017]	MYCOBACTERIUM	AP014547.1	MYCOBACTERIUM ABSCESSUS SUBSP. BOLLETII CCUG 48898 = JCM 15300 DNA, COMPLETE GENOME	MYCOBACTERIUM
-1.36028	AY129339.1	MYCOBACTERIOPHAGE BARNYARD, COMPLETE GENOME. [26-MAY-2017]	MYCOBACTERIUM	NC_008009.1	CANDIDATUS KORIBACTER VERSATILIS ELLIN345, COMPLETE GENOME	CANDIDATUS
-1.35887	AY131267.2	BACTERIOPHAGE LC-NU, COMPLETE GENOME. [26-MAY-2017]	UNKNOWN	AP012544.1	LACTOBACILLUS CASEI SUBSP. CASEI ATCC 393 DNA, COMPLETE GENOME	LACTOBACILLUS
-1.33775	AY135486.1	ENTEROBACTERIA PHAGE PSP3, COMPLETE GENOME. [25-AUG-2017]	ENTEROBACTERIA	CP010280.1	SALMONELLA ENTERICA SUBSP. ENTERICA SEROVAR NEWPORT STR. CVM 22462, COMPLETE GENOME	SALMONELLA
-1.32555	AY135739.1	BACTERIOPHAGE WPHI, COMPLETE GENOME	UNKNOWN	NC_017664.1	ESCHERICHIA COLI W, COMPLETE GENOME	ESCHERICHIA
-1.3671	AY150271.2	ENTEROBACTERIA PHAGE EPSILON15, COMPLETE GENOME	ENTEROBACTERIA	NC_018658.1	ESCHERICHIA COLI O104:H4 STR. 2011C-3493 CHROMOSOME, COMPLETE GENOME	ESCHERICHIA
-1.30324	AY176327.1	STAPHYLOCOCCUS PHAGE K, COMPLETE GENOME. [25-AUG-2017]	STAPHYLOCOCCUS	FN665652.1	CLOSTRIDIUM DIFFICILE COMPLETE GENOME, STRAIN CF5	CLOSTRIDIUM
-1.35938	AY190604.1	HALOVIRUS HF1, COMPLETE GENOME	HALOVIRUS	NC_017941.2	HALOFERAX MEDITERRANEI ATCC 33500, COMPLETE GENOME	HALOFERAX
-1.34826	AY212251.1	STREPTOCOCCUS PHAGE C1, COMPLETE GENOME	STREPTOCOCCUS	CP007447.1	STAPHYLOCOCCUS AUREUS STRAIN XN108, COMPLETE GENOME	STAPHYLOCOCCUS
-1.38383	AY216660.1	ENTEROBACTERIA PHAGE T1, COMPLETE GENOME. [25-AUG-2017]	ENTEROBACTERIA	CP004083.1	ENTEROBACTERIACEAE BACTERIUM BTA3-1, COMPLETE GENOME	ENTEROBACTERIACEAE
-1.36484	AY236756.1	LACTOBACILLUS PLANTARUM BACTERIOPHAGE PHIJL-1, COMPLETE GENOME. [25-AUG-2017]	LACTOBACILLUS	NC_008531.1	LEUCONOSTOC MESENTEROIDES SUBSP. MESENTEROIDES ATCC 8293, COMPLETE GENOME	LEUCONOSTOC
-1.3708	AY242528.1	VIBRIO CHOLERAE PHAGE VGJPHI, COMPLETE GENOME	VIBRIO	NC_015276.1	MARINOMONAS MEDITERRANEA MMB-1, COMPLETE GENOME	MARINOMONAS
-1.39893	AY247822.1	YERSINIA PESTIS PHAGE PHIA1122, COMPLETE GENOME	YERSINIA	CP002122.1	PREVOTELLA MELANINOGENICA ATCC 25845 CHROMOSOME I, COMPLETE SEQUENCE	PREVOTELLA
-1.33426	AY251033.1	BACTERIOPHAGE L-413C, COMPLETE GENOME	UNKNOWN	CP002797.2	ESCHERICHIA COLI NA114, COMPLETE GENOME	ESCHERICHIA
-1.36239	AY257527.1	BACILLUS THURINGIENSIS BACTERIOPHAGE BAM35C, COMPLETE GENOME	BACILLUS	CP009351.1	BACILLUS THURINGIENSIS HD1002, COMPLETE GENOME	BACILLUS
-1.40003	AY264774.1	ENTEROBACTERIA PHAGE T7, COMPLETE GENOME	ENTEROBACTERIA	NC_013203.1	ATOPOBIUM PARVULUM DSM 20469, COMPLETE GENOME	ATOPOBIUM
-1.3804	AY266303.2	BACTERIOPHAGE AEH1, COMPLETE GENOME	UNKNOWN	CP009281.1	PAENIBACILLUS SP. FSL R5-0345, COMPLETE GENOME	PAENIBACILLUS
-1.3746	AY283928.2	BACTERIOPHAGE KVP40, COMPLETE GENOME	UNKNOWN	FM954972.2	VIBRIO SPLENDIDUS LGP32 CHROMOSOME 1	VIBRIO
-1.38924	AY288927.2	ENTEROBACTERIA PHAGE SP6, COMPLETE GENOME	ENTEROBACTERIA	CP009621.1	PONTIBACTER KORLENSIS STRAIN X14-1T, COMPLETE GENOME	PONTIBACTER
-1.39133	AY299121.1	XANTHOMONAS ORYZAE BACTERIOPHAGE XP10 GENOMIC DNA, COMPLETE GENOME	XANTHOMONAS	CP000554.1	PROCHLOROCOCCUS MARINUS STR. MIT 9303, COMPLETE GENOME	PROCHLOROCOCCUS
-1.36117	AY303349.1	ENTEROBACTERIA PHAGE RB69, COMPLETE GENOME	ENTEROBACTERIA	NC_017770.1	SOLITALEA CANADENSIS DSM 3403, COMPLETE GENOME	SOLITALEA
-1.36645	AY308796.1	BACTERIOPHAGE TLS, COMPLETE GENOME. [25-AUG-2017]	UNKNOWN	FO704551.1	XENORHABDUS POINARII STR. G6 CHROMOSOME, COMPLETE GENOME	XENORHABDUS
-1.25415	AY320035.2	BACTERIOPHAGE VWB, COMPLETE GENOME. [26-MAY-2017]	UNKNOWN	CP011341.1	RHODOCOCCUS AETHERIVORANS STRAIN ICDP1, COMPLETE GENOME	RHODOCOCCUS
-1.37447	AY343333.1	ENTEROBACTERIA PHAGE RB49, COMPLETE GENOME	ENTEROBACTERIA	NC_015277.1	SPHINGOBACTERIUM SP. 21, COMPLETE GENOME	SPHINGOBACTERIUM
-1.28504	AY349011.3	BURKHOLDERIA CEPACIA PHAGE BCEP22, COMPLETE GENOME	BURKHOLDERIA	NC_020516.1	AZOARCUS SP. KH32C DNA, COMPLETE GENOME	AZOARCUS
-1.32875	AY357582.2	BURKHOLDERIA CEPACIA PHAGE BCEPNAZGUL, COMPLETE GENOME	BURKHOLDERIA	CP010518.3	PANDORAEA APISTA STRAIN TF81F4, COMPLETE GENOME	PANDORAEA
-1.29797	AY368235.2	BURKHOLDERIA CEPACIA PHAGE BCEP43, COMPLETE GENOME. [25-AUG-2017]	BURKHOLDERIA	CP000151.1	BURKHOLDERIA LATA STRAIN 383 CHROMOSOME 1, COMPLETE SEQUENCE	BURKHOLDERIA
-1.29482	AY369265.2	BURKHOLDERIA CENOCEPACIA PHAGE BCEP1, COMPLETE GENOME	BURKHOLDERIA	CP000152.1	BURKHOLDERIA LATA STRAIN 383 CHROMOSOME 2, COMPLETE SEQUENCE	BURKHOLDERIA
-1.38591	AY370674.1	ENTEROBACTERIA PHAGE K1-5, COMPLETE GENOME. [26-MAY-2017]	ENTEROBACTERIA	CP009281.1	PAENIBACILLUS SP. FSL R5-0345, COMPLETE GENOME	PAENIBACILLUS
-1.36245	AY370762.1	FUSELLOVIRUS SSV2, COMPLETE GENOME	FUSELLOVIRUS	NC_021058.1	SULFOLOBUS ISLANDICUS LAL14/1, COMPLETE GENOME	SULFOLOBUS
-1.36964	AY374414.2	RALSTONIA PHAGE P12J, COMPLETE GENOME	RALSTONIA	NC_008009.1	CANDIDATUS KORIBACTER VERSATILIS ELLIN345, COMPLETE GENOME	CANDIDATUS
-1.36653	AY374448.1	BACTERIOPHAGE PHIKO2, COMPLETE GENOME. [26-MAY-2017]	UNKNOWN	NC_011751.1	ESCHERICHIA COLI UMN026, COMPLETE GENOME	ESCHERICHIA
-1.38088	AY375531.1	BACTERIOPHAGE 44RR2.8T, COMPLETE GENOME	UNKNOWN	NC_015277.1	SPHINGOBACTERIUM SP. 21, COMPLETE GENOME	SPHINGOBACTERIUM
-1.35655	AY388628.1	SULFOLOBUS SPINDLE-SHAPED VIRUS RAGGED HILLS, COMPLETE GENOME	SULFOLOBUS	NC_012726.1	SULFOLOBUS ISLANDICUS M.16.4, COMPLETE GENOME	SULFOLOBUS
-1.29491	AY394005.1	BACTERIOPHAGE D3112, COMPLETE GENOME	UNKNOWN	CP011317.1	PSEUDOMONAS AERUGINOSA STRAIN CARB01 63, COMPLETE GENOME	PSEUDOMONAS
-1.36274	AY423772.1	SULFOLOBUS SPINDLE-SHAPED VIRUS KAMCHATKA-1, COMPLETE GENOME	SULFOLOBUS	NC_012726.1	SULFOLOBUS ISLANDICUS M.16.4, COMPLETE GENOME	SULFOLOBUS
-1.31096	AY453853.1	BACTERIOPHAGE PHI1026B, COMPLETE GENOME	UNKNOWN	CP000124.1	BURKHOLDERIA PSEUDOMALLEI 1710B CHROMOSOME I, COMPLETE SEQUENCE	BURKHOLDERIA
-1.33495	AY459533.1	LACTOBACILLUS JOHNSONII PROPHAGE LJ928, COMPLETE GENOME	LACTOBACILLUS	NC_017477.1	LACTOBACILLUS JOHNSONII DPC 6026, COMPLETE GENOME	LACTOBACILLUS
-1.28786	AY459535.1	LACTOBACILLUS JOHNSONII PROPHAGE LJ965, COMPLETE GENOME	LACTOBACILLUS	NC_005362.1	LACTOBACILLUS JOHNSONII NCC 533, COMPLETE GENOME	LACTOBACILLUS
-1.32237	AY500152.1	MYCOBACTERIOPHAGE U2, COMPLETE GENOME. [25-AUG-2017]	MYCOBACTERIUM	CP009914.1	MYCOBACTERIUM SP. VKM AC-1817D, COMPLETE GENOME	MYCOBACTERIUM
-1.32696	AY500153.1	MYCOBACTERIOPHAGE BETHLEHEM, COMPLETE GENOME. [25-AUG-2017]	MYCOBACTERIUM	NC_016604.1	MYCOBACTERIUM RHODESIAE NBB3, COMPLETE GENOME	MYCOBACTERIUM
-1.39046	AY505112.1	VIBRIOPHAGE VP2, COMPLETE GENOME	VIBRIO	CP002377.1	VIBRIO FURNISSII NCTC 11218 CHROMOSOME 1, COMPLETE SEQUENCE	VIBRIO
-1.31111	AY508486.1	BACTERIOPHAGE 77, COMPLETE GENOME. [26-MAY-2017]	UNKNOWN	CP007447.1	STAPHYLOCOCCUS AUREUS STRAIN XN108, COMPLETE GENOME	STAPHYLOCOCCUS
-1.39039	AY510084.1	VIBRIOPHAGE VP5, COMPLETE GENOME. [24-FEB-2017]	VIBRIO	CP002377.1	VIBRIO FURNISSII NCTC 11218 CHROMOSOME 1, COMPLETE SEQUENCE	VIBRIO
-1.30766	AY539836.1	BURKHOLDERIA CENOCEPACIA PHAGE BCEPMU, COMPLETE GENOME. [25-AUG-2017]	BURKHOLDERIA	NC_020516.1	AZOARCUS SP. KH32C DNA, COMPLETE GENOME	AZOARCUS
-1.37138	AY543070.1	BACTERIOPHAGE T5, COMPLETE GENOME. [25-AUG-2017]	UNKNOWN	CP008852.1	PELOSINUS SP. UFO1, COMPLETE GENOME	PELOSINUS
-1.34285	AY569307.1	SULFOLOBUS TURRETED ICOSAHEDRAL VIRUS, COMPLETE GENOME	SULFOLOBUS	NC_012726.1	SULFOLOBUS ISLANDICUS M.16.4, COMPLETE GENOME	SULFOLOBUS
-1.387	AY575774.1	PSEUDOMONAS AERUGINOSA BACTERIOPHAGE PAP2, COMPLETE GENOME. [26-MAY-2017]	PSEUDOMONAS	NC_018515.1	DESULFOSPOROSINUS MERIDIEI DSM 13257, COMPLETE GENOME	DESULFOSPOROSINUS
-1.25089	AY576796.1	ACTINOPLANES PHAGE PHIASP2, COMPLETE GENOME. [26-MAY-2017]	ACTINOPLANES	NC_013595.1	STREPTOSPORANGIUM ROSEUM DSM 43021, COMPLETE GENOME	STREPTOSPORANGIUM
-1.21785	AY583234.1	MYCOPLASMA PHAGE PHIMFV1, COMPLETE GENOME	MYCOPLASMA	NC_014921.1	MYCOPLASMA FERMENTANS M64, COMPLETE GENOME	MYCOPLASMA
-1.22062	AY583236.1	MYCOPLASMA PHAGE PHIMFV1, COMPLETE GENOME. [26-MAY-2017]	MYCOPLASMA	NC_014921.1	MYCOPLASMA FERMENTANS M64, COMPLETE GENOME	MYCOPLASMA
-1.37176	AY587007.1	BACTERIOPHAGE T5 STRAIN ATCC 11303-B5, COMPLETE GENOME. [25-AUG-2017]	UNKNOWN	CP008852.1	PELOSINUS SP. UFO1, COMPLETE GENOME	PELOSINUS
-1.311	AY605066.1	BACTERIOPHAGE PHI AT3, COMPLETE SEQUENCE. [26-MAY-2017]	UNKNOWN	AP012544.1	LACTOBACILLUS CASEI SUBSP. CASEI ATCC 393 DNA, COMPLETE GENOME	LACTOBACILLUS
-1.27291	AY605181.1	BURKHOLDERIA CEPACIA COMPLEX PHAGE BCEPC6B, COMPLETE GENOME. [26-MAY-2017]	BURKHOLDERIA	CP011301.1	BURKHOLDERIA CEPACIA STRAIN LO6, COMPLETE GENOME	BURKHOLDERIA
-1.36615	AY616033.2	BURKHOLDERIA CENOCEPACIA PHAGE BCEPB1A, COMPLETE GENOME. [26-MAY-2017]	BURKHOLDERIA	NC_015717.1	HYPHOMICROBIUM SP. MC1 CHROMOSOME, COMPLETE GENOME	HYPHOMICROBIUM
-1.37025	AY616446.1	BACILLUS CLARKII BACTERIOPHAGE BCJA1C, COMPLETE GENOME. [25-AUG-2017]	BACILLUS	NC_016584.1	DESULFOSPOROSINUS ORIENTIS DSM 765, COMPLETE GENOME	DESULFOSPOROSINUS
-1.3225	AY625898.1	PSEUDOMONAS AERUGINOSA PHAGE F116, COMPLETE GENOME. [26-MAY-2017]	PSEUDOMONAS	NC_018028.1	PSEUDOMONAS STUTZERI CCUG 29243, COMPLETE GENOME	PSEUDOMONAS
-1.37117	AY692264.1	BACTERIOPHAGE T5 STRAIN ST0 DELETION MUTANT, COMPLETE GENOME	UNKNOWN	CP008852.1	PELOSINUS SP. UFO1, COMPLETE GENOME	PELOSINUS
-1.3714	AY699705.1	STREPTOCOCCUS THERMOPHILUS BACTERIOPHAGE 2972, COMPLETE GENOME. [25-AUG-2017]	STREPTOCOCCUS	NC_017595.1	STREPTOCOCCUS SALIVARIUS JIM8777 COMPLETE GENOME	STREPTOCOCCUS
-1.377	AY714348.1	VIBRIO CHOLERAE PHAGE KSF-1PHI, COMPLETE GENOME. [25-AUG-2017]	VIBRIO	NC_017731.1	PROVIDENCIA STUARTII MRSN 2154, COMPLETE GENOME	PROVIDENCIA
-1.391	AY730274.2	SALMONELLA PHAGE SS3E, COMPLETE GENOME. [25-AUG-2017]	SALMONELLA	NC_011147.1	SALMONELLA ENTERICA SUBSP. ENTERICA SEROVAR PARATYPHI A STR. AKU_12601 COMPLETE GENOME, STRAIN AKU_12601	SALMONELLA
-1.37199	AY736146.1	SALMONELLA TYPHIMURIUM BACTERIOPHAGE ES18, COMPLETE SEQUENCE. [25-AUG-2017]	SALMONELLA	NC_011094.1	SALMONELLA ENTERICA SUBSP. ENTERICA SEROVAR SCHWARZENGRUND STR. CVM19633, COMPLETE GENOME	SALMONELLA
-1.37812	AY739900.2	LACTOBACILLUS PHAGE LL-KU, COMPLETE GENOME. [25-AUG-2017]	LACTOBACILLUS	CP009281.1	PAENIBACILLUS SP. FSL R5-0345, COMPLETE GENOME	PAENIBACILLUS
-1.36469	AY769964.1	CHLAMYDIA PHAGE 4, COMPLETE GENOME. [29-AUG-2014]	CHLAMYDIA	NC_015702.1	PARACHLAMYDIA ACANTHAMOEBAE UV-7, COMPLETE GENOME	PARACHLAMYDIA
-1.37208	AY772740.1	LISTONELLA PELAGIA PHAGE PHIHSIC, COMPLETE GENOME. [25-AUG-2017]	LISTONELLA	NC_018679.1	ALTEROMONAS MACLEODII STR. 'BALEARIC SEA AD45', COMPLETE GENOME	ALTEROMONAS
-1.35481	AY848689.1	ENTEROBACTERIA PHAGE PRD1, COMPLETE GENOME. [26-MAY-2017]	ENTEROBACTERIA	NC_015572.1	METHYLOMONAS METHANICA MC09, COMPLETE GENOME	METHYLOMONAS
-1.2695	AY855346.1	CLOSTRIDIUM DIFFICILE BACTERIOPHAGE PHI CD119, COMPLETE GENOME. [25-AUG-2017]	CLOSTRIDIUM	NC_009089.1	CLOSTRIDIOIDES DIFFICILE 630, COMPLETE GENOME	CLOSTRIDIOIDES
-1.3663	AY939843.2	PROCHLOROCOCCUS PHAGE P-SSP7, COMPLETE GENOME. [26-MAY-2017]	PROCHLOROCOCCUS	CP000817.1	LYSINIBACILLUS SPHAERICUS C3-41, COMPLETE GENOME	LYSINIBACILLUS
-1.33591	AY939844.2	PROCHLOROCOCCUS PHAGE P-SSM2, COMPLETE GENOME. [25-AUG-2017]	PROCHLOROCOCCUS	NC_020291.1	CLOSTRIDIUM SACCHAROPERBUTYLACETONICUM N1-4(HMT), COMPLETE GENOME	CLOSTRIDIUM
-1.35062	AY940168.2	PROCHLOROCOCCUS PHAGE P-SSM4, COMPLETE GENOME. [25-AUG-2017]	PROCHLOROCOCCUS	NC_010001.1	LACHNOCLOSTRIDIUM PHYTOFERMENTANS ISDG, COMPLETE GENOME	LACHNOCLOSTRIDIUM
-1.27311	AY950802.1	HALOARCULA PHAGE SH1, COMPLETE GENOME	HALOARCULA	NC_013929.1	STREPTOMYCES SCABIEI 87.22 COMPLETE GENOME	STREPTOMYCES
-1.29607	AY954948.1	BACTERIOPHAGE PT1028, COMPLETE GENOME. [26-MAY-2017]	UNKNOWN	NC_017347.1	STAPHYLOCOCCUS AUREUS SUBSP. AUREUS T0131, COMPLETE GENOME	STAPHYLOCOCCUS
-1.29794	AY954949.1	BACTERIOPHAGE 66, COMPLETE GENOME. [11-NOV-2016]	UNKNOWN	NC_017342.1	STAPHYLOCOCCUS AUREUS SUBSP. AUREUS TCH60, COMPLETE GENOME	STAPHYLOCOCCUS
-1.32892	AY954950.1	BACTERIOPHAGE 187, COMPLETE GENOME. [25-AUG-2017]	UNKNOWN	NC_009632.1	STAPHYLOCOCCUS AUREUS SUBSP. AUREUS JH1, COMPLETE GENOME	STAPHYLOCOCCUS
-1.30167	AY954951.1	BACTERIOPHAGE 69, COMPLETE GENOME. [25-AUG-2017]	UNKNOWN	NC_009641.1	STAPHYLOCOCCUS AUREUS SUBSP. AUREUS STR. NEWMAN DNA, COMPLETE GENOME	STAPHYLOCOCCUS
-1.29417	AY954952.1	BACTERIOPHAGE 53, COMPLETE GENOME. [25-AUG-2017]	UNKNOWN	NC_009641.1	STAPHYLOCOCCUS AUREUS SUBSP. AUREUS STR. NEWMAN DNA, COMPLETE GENOME	STAPHYLOCOCCUS
-1.30623	AY954953.1	BACTERIOPHAGE 85, COMPLETE GENOME. [25-AUG-2017]	UNKNOWN	NC_009641.1	STAPHYLOCOCCUS AUREUS SUBSP. AUREUS STR. NEWMAN DNA, COMPLETE GENOME	STAPHYLOCOCCUS
-1.35291	AY954954.1	BACTERIOPHAGE 2638A, COMPLETE GENOME. [26-MAY-2017]	UNKNOWN	CP006837.1	LYSINIBACILLUS VARIANS STRAIN GY32, COMPLETE GENOME	LYSINIBACILLUS
-1.30841	AY954955.1	BACTERIOPHAGE 42E, COMPLETE GENOME. [25-AUG-2017]	UNKNOWN	NC_017337.1	STAPHYLOCOCCUS AUREUS SUBSP. AUREUS ED133, COMPLETE GENOME	STAPHYLOCOCCUS
-1.29805	AY954956.1	BACTERIOPHAGE 3A, COMPLETE GENOME. [25-AUG-2017]	UNKNOWN	NC_018608.1	STAPHYLOCOCCUS AUREUS 08BA02176, COMPLETE GENOME	STAPHYLOCOCCUS
-1.30016	AY954957.1	BACTERIOPHAGE 47, COMPLETE GENOME. [25-AUG-2017]	UNKNOWN	NC_009632.1	STAPHYLOCOCCUS AUREUS SUBSP. AUREUS JH1, COMPLETE GENOME	STAPHYLOCOCCUS
-1.34233	AY954958.1	BACTERIOPHAGE 37, COMPLETE GENOME. [25-AUG-2017]	UNKNOWN	NC_009487.1	STAPHYLOCOCCUS AUREUS SUBSP. AUREUS JH9, COMPLETE GENOME	STAPHYLOCOCCUS
-1.34968	AY954959.1	BACTERIOPHAGE EW, COMPLETE GENOME. [25-AUG-2017]	UNKNOWN	NC_009632.1	STAPHYLOCOCCUS AUREUS SUBSP. AUREUS JH1, COMPLETE GENOME	STAPHYLOCOCCUS
-1.31162	AY954960.1	BACTERIOPHAGE 96, COMPLETE GENOME. [25-AUG-2017]	UNKNOWN	NC_009641.1	STAPHYLOCOCCUS AUREUS SUBSP. AUREUS STR. NEWMAN DNA, COMPLETE GENOME	STAPHYLOCOCCUS
-1.30314	AY954961.1	BACTERIOPHAGE ROSA, COMPLETE GENOME. [25-AUG-2017]	UNKNOWN	NC_009641.1	STAPHYLOCOCCUS AUREUS SUBSP. AUREUS STR. NEWMAN DNA, COMPLETE GENOME	STAPHYLOCOCCUS
-1.31583	AY954962.1	BACTERIOPHAGE 71, COMPLETE GENOME. [25-AUG-2017]	UNKNOWN	NC_009487.1	STAPHYLOCOCCUS AUREUS SUBSP. AUREUS JH9, COMPLETE GENOME	STAPHYLOCOCCUS
-1.31437	AY954963.1	BACTERIOPHAGE 55, COMPLETE GENOME. [26-MAY-2017]	UNKNOWN	NC_009487.1	STAPHYLOCOCCUS AUREUS SUBSP. AUREUS JH9, COMPLETE GENOME	STAPHYLOCOCCUS
-1.31258	AY954964.1	BACTERIOPHAGE 29, COMPLETE GENOME. [25-AUG-2017]	UNKNOWN	NC_009487.1	STAPHYLOCOCCUS AUREUS SUBSP. AUREUS JH9, COMPLETE GENOME	STAPHYLOCOCCUS
-1.31465	AY954965.1	BACTERIOPHAGE 52A, COMPLETE GENOME. [26-MAY-2017]	UNKNOWN	NC_009487.1	STAPHYLOCOCCUS AUREUS SUBSP. AUREUS JH9, COMPLETE GENOME	STAPHYLOCOCCUS
-1.31107	AY954966.1	BACTERIOPHAGE 88, COMPLETE GENOME. [25-AUG-2017]	UNKNOWN	NC_009632.1	STAPHYLOCOCCUS AUREUS SUBSP. AUREUS JH1, COMPLETE GENOME	STAPHYLOCOCCUS
-1.31448	AY954967.1	BACTERIOPHAGE 92, COMPLETE GENOME. [25-AUG-2017]	UNKNOWN	NC_009487.1	STAPHYLOCOCCUS AUREUS SUBSP. AUREUS JH9, COMPLETE GENOME	STAPHYLOCOCCUS
-1.32948	AY954968.1	BACTERIOPHAGE X2, COMPLETE GENOME. [25-AUG-2017]	UNKNOWN	NC_009487.1	STAPHYLOCOCCUS AUREUS SUBSP. AUREUS JH9, COMPLETE GENOME	STAPHYLOCOCCUS
-1.3013	AY954969.1	BACTERIOPHAGE G1, COMPLETE GENOME. [25-AUG-2017]	UNKNOWN	FN665652.1	CLOSTRIDIUM DIFFICILE COMPLETE GENOME, STRAIN CF5	CLOSTRIDIUM
-1.30612	AY954970.1	STAPHYLOCOCCUS PHAGE TWORT, COMPLETE GENOME. [25-AUG-2017]	STAPHYLOCOCCUS	FN665652.1	CLOSTRIDIUM DIFFICILE COMPLETE GENOME, STRAIN CF5	CLOSTRIDIUM
-1.38113	AY962392.1	AEROMONAS PHAGE 31, COMPLETE GENOME. [25-AUG-2017]	AEROMONAS	NC_016041.1	GLACIECOLA NITRATIREDUCENS FR1064, COMPLETE GENOME	GLACIECOLA
-1.37638	AY967407.1	ENTEROBACTERIA PHAGE RB43, COMPLETE GENOME. [25-AUG-2017]	ENTEROBACTERIA	NC_013132.1	CHITINOPHAGA PINENSIS DSM 2588, COMPLETE GENOME	CHITINOPHAGA
-1.3585	BK000583.1	ENTEROBACTERIA PHAGE P22 WILD TYPE, COMPLETE GENOME. [25-AUG-2017]	ENTEROBACTERIA	NC_011083.1	SALMONELLA ENTERICA SUBSP. ENTERICA SEROVAR HEIDELBERG STR. SL476, COMPLETE GENOME	SALMONELLA
-1.2607	CP000315.1	CLOSTRIDIUM PHAGE PHISM101, COMPLETE GENOME. [26-MAY-2017]	CLOSTRIDIUM	NC_008261.1	CLOSTRIDIUM PERFRINGENS ATCC 13124, COMPLETE GENOME	CLOSTRIDIUM
-1.30702	CP000622.1	BURKHOLDERIA PHAGE PHIE255, COMPLETE GENOME. [25-AUG-2017]	BURKHOLDERIA	NC_020516.1	AZOARCUS SP. KH32C DNA, COMPLETE GENOME	AZOARCUS
-1.25319	CP000623.1	BURKHOLDERIA PHAGE PHIE202, COMPLETE GENOME. [25-AUG-2017]	BURKHOLDERIA	BX571965.1	BURKHOLDERIA PSEUDOMALLEI STRAIN K96243, CHROMOSOME 1, COMPLETE SEQUENCE	BURKHOLDERIA
-1.25137	CP000624.1	BURKHOLDERIA PHAGE PHIE12-2, COMPLETE GENOME. [25-AUG-2017]	BURKHOLDERIA	CP009586.1	BURKHOLDERIA PSEUDOMALLEI STRAIN PHLS 112 CHROMOSOME II, COMPLETE SEQUENCE	BURKHOLDERIA
-1.33181	CP000625.2	BURKHOLDERIA PHAGE PHI644-2, COMPLETE GENOME. [25-AUG-2017]	BURKHOLDERIA	CP000124.1	BURKHOLDERIA PSEUDOMALLEI 1710B CHROMOSOME I, COMPLETE SEQUENCE	BURKHOLDERIA
-1.37368	CP000917.1	ENTEROBACTERIA PHAGE EPS7, COMPLETE GENOME. [25-AUG-2017]	ENTEROBACTERIA	CP010976.1	PAENIBACILLUS SP. IHBB 10380, COMPLETE GENOME	PAENIBACILLUS
-1.31916	CP002495.1	ENTEROCOCCUS PHAGE EF62PHI, COMPLETE GENOME. [25-AUG-2017]	ENTEROCOCCUS	CP004870.1	BACILLUS THURINGIENSIS SEROVAR KURSTAKI STR. HD-1, COMPLETE GENOME	BACILLUS
-1.36527	CP002889.1	STREPTOCOCCUS PHAGE YMC-2011, COMPLETE GENOME. [26-MAY-2017]	STREPTOCOCCUS	NC_017595.1	STREPTOCOCCUS SALIVARIUS JIM8777 COMPLETE GENOME	STREPTOCOCCUS
-1.33892	CP003186.1	THERMOANAEROBACTERIUM PHAGE THSA-485A, COMPLETE GENOME. [25-AUG-2017]	THERMOANAEROBACTERIUM	NC_019970.1	THERMOANAEROBACTERIUM THERMOSACCHAROLYTICUM M0795, COMPLETE GENOME	THERMOANAEROBACTERIUM
-1.26992	CP008753.1	BURKHOLDERIA PHAGE BEK, COMPLETE GENOME. [25-AUG-2017]	BURKHOLDERIA	BX571966.1	BURKHOLDERIA PSEUDOMALLEI STRAIN K96243, CHROMOSOME 2, COMPLETE SEQUENCE	BURKHOLDERIA
-1.25862	CP011970.1	PEPTOCLOSTRIDIUM PHAGE PHICDIF1296T STRAIN DSM 1296, COMPLETE SEQUENCE	PEPTOCLOSTRIDIUM	FN665652.1	CLOSTRIDIUM DIFFICILE COMPLETE GENOME, STRAIN CF5	CLOSTRIDIUM
-1.37094	CP017905.1	VIBRIO PHAGE K05K4_VK05K4_1, COMPLETE SEQUENCE	VIBRIO	BA000031.2	VIBRIO PARAHAEMOLYTICUS RIMD 2210633 DNA, CHROMOSOME 1, COMPLETE SEQUENCE	VIBRIO
-1.36981	CP017906.1	VIBRIO PHAGE K05K4_VK05K4_2, COMPLETE SEQUENCE	VIBRIO	BA000031.2	VIBRIO PARAHAEMOLYTICUS RIMD 2210633 DNA, CHROMOSOME 1, COMPLETE SEQUENCE	VIBRIO
-1.33063	CU468217.1	CU468217 AZOSPIRILLUM BRASILENSE BACTERIOPHAGE CD, COMPLETE GENOME. [25-AUG-2017]	CU468217	FO082820.1	RHIZOBIUM SP. NT-26 CHROMOSOME, COMPLETE GENOME	RHIZOBIUM
-1.34809	D00624.1	CHLAMYDIA PHAGE CHP1 DNA, COMPLETE GENOME. [26-MAY-2017]	CHLAMYDIA	NC_015177.1	PSEUDOPEDOBACTER SALTANS DSM 12145, COMPLETE GENOME	PSEUDOPEDOBACTER
-1.36828	D89074.1	VIBRIO PHAGE FS1 DNA, COMPLETE GENOME	VIBRIO	NC_009654.1	MARINOMONAS SP. MWYL1, COMPLETE GENOME	MARINOMONAS
-1.32786	DQ003637.1	LISTERIA PHAGE A500, COMPLETE GENOME. [25-AUG-2017]	LISTERIA	NC_021829.2	LISTERIA MONOCYTOGENES J1-220, COMPLETE GENOME	LISTERIA
-1.34656	DQ003638.2	LISTERIA PHAGE A511, COMPLETE GENOME. [25-AUG-2017]	LISTERIA	NC_015275.1	CLOSTRIDIUM LENTOCELLUM DSM 5427, COMPLETE GENOME	CLOSTRIDIUM
-1.3249	DQ003639.1	LISTERIA PHAGE B025, COMPLETE GENOME. [26-MAY-2017]	LISTERIA	NC_017537.1	LISTERIA MONOCYTOGENES M7, COMPLETE GENOME	LISTERIA
-1.33368	DQ003640.1	LISTERIA PHAGE B054, COMPLETE GENOME. [25-AUG-2017]	LISTERIA	NC_003212.1	LISTERIA INNOCUA CLIP11262 COMPLETE GENOME	LISTERIA
-1.38415	DQ003641.1	LISTERIA PHAGE P35, COMPLETE GENOME. [25-AUG-2017]	LISTERIA	NC_020514.1	PARAGLACIECOLA PSYCHROPHILA 170, COMPLETE GENOME	PARAGLACIECOLA
-1.31854	DQ003642.1	LISTERIA PHAGE A006, COMPLETE GENOME. [25-AUG-2017]	LISTERIA	HG813249.1	LISTERIA MONOCYTOGENES 6179 CHROMOSOME SEQUENCE	LISTERIA
-1.37514	DQ029335.1	VIBRIOPHAGE VP4, COMPLETE GENOME. [26-MAY-2017]	VIBRIO	CP002122.1	PREVOTELLA MELANINOGENICA ATCC 25845 CHROMOSOME I, COMPLETE SEQUENCE	PREVOTELLA
-1.34223	DQ054536.1	LACTOCOCCUS PHAGE P008, COMPLETE GENOME. [25-AUG-2017]	LACTOCOCCUS	NC_010001.1	LACHNOCLOSTRIDIUM PHYTOFERMENTANS ISDG, COMPLETE GENOME	LACHNOCLOSTRIDIUM
-1.39108	DQ079869.1	ENTEROBACTERIA PHAGE ID2 MOSCOW/ID/2001, COMPLETE GENOME. [26-MAY-2017]	ENTEROBACTERIA	CP008849.1	ALTEROMONAS AUSTRALICA STRAIN H 17, COMPLETE GENOME	ALTEROMONAS
-1.37511	DQ079873.1	COLIPHAGE WA13, COMPLETE GENOME. [26-MAY-2017]	COLIPHAGE	CP009281.1	PAENIBACILLUS SP. FSL R5-0345, COMPLETE GENOME	PAENIBACILLUS
-1.37896	DQ085810.2	ENTEROBACTERIA PHAGE ALPHA3, COMPLETE GENOME. [26-MAY-2017]	ENTEROBACTERIA	CP009281.1	PAENIBACILLUS SP. FSL R5-0345, COMPLETE GENOME	PAENIBACILLUS
-1.26028	DQ087285.2	BURKHOLDERIA PSEUDOMALLEI PHAGE PHI52237, COMPLETE GENOME	BURKHOLDERIA	BX571965.1	BURKHOLDERIA PSEUDOMALLEI STRAIN K96243, CHROMOSOME 1, COMPLETE SEQUENCE	BURKHOLDERIA
-1.40009	DQ111067.1	COLIPHAGE K1F, COMPLETE GENOME. [26-MAY-2017]	COLIPHAGE	CP002122.1	PREVOTELLA MELANINOGENICA ATCC 25845 CHROMOSOME I, COMPLETE SEQUENCE	PREVOTELLA
-1.38033	DQ121662.1	BACTERIOPHAGE JK06, COMPLETE GENOME. [25-AUG-2017]	UNKNOWN	CP009279.1	PAENIBACILLUS SP. FSL H7-0737, COMPLETE GENOME	PAENIBACILLUS
-1.40254	DQ123818.2	ACTINOMYCES PHAGE AV-1, COMPLETE GENOME	ACTINOMYCES	NC_022124.1	PREVOTELLA SP. ORAL TAXON 299 STR. F0039, COMPLETE GENOME	PREVOTELLA
-1.36836	DQ126339.2	ENTEROBACTERIA PHAGE PHIV10, COMPLETE GENOME. [26-MAY-2017]	ENTEROBACTERIA	NC_011740.1	ESCHERICHIA FERGUSONII ATCC 35469 CHROMOSOME, COMPLETE GENOME	ESCHERICHIA
-1.37166	DQ149023.2	SYNECHOCOCCUS CYANOPHAGE SYN9, COMPLETE GENOME. [25-AUG-2017]	SYNECHOCOCCUS	CP009278.1	SPHINGOBACTERIUM SP. ML3W, COMPLETE GENOME	SPHINGOBACTERIUM
-1.32784	DQ150593.1	BACILLUS ANTHRACIS BACTERIOPHAGE FAH, COMPLETE SEQUENCE. [25-AUG-2017]	BACILLUS	CP009300.1	BACILLUS CEREUS D17, COMPLETE GENOME	BACILLUS
-1.32177	DQ163912.1	BACTERIOPHAGE F10, COMPLETE GENOME. [29-AUG-2014]	UNKNOWN	NC_011770.1	PSEUDOMONAS AERUGINOSA LESB58 COMPLETE GENOME SEQUENCE	PSEUDOMONAS
-1.35959	DQ163913.1	BACTERIOPHAGE PA73, COMPLETE GENOME. [24-FEB-2017]	UNKNOWN	NC_015572.1	METHYLOMONAS METHANICA MC09, COMPLETE GENOME	METHYLOMONAS
-1.38591	DQ163914.1	BACTERIOPHAGE 119X, COMPLETE GENOME. [29-AUG-2014]	UNKNOWN	NC_018515.1	DESULFOSPOROSINUS MERIDIEI DSM 13257, COMPLETE GENOME	DESULFOSPOROSINUS
-1.38828	DQ163915.1	BACTERIOPHAGE PA11, COMPLETE GENOME. [29-AUG-2014]	UNKNOWN	CP009281.1	PAENIBACILLUS SP. FSL R5-0345, COMPLETE GENOME	PAENIBACILLUS
-1.31276	DQ163916.1	BACTERIOPHAGE M6, COMPLETE GENOME. [11-NOV-2016]	UNKNOWN	NC_014623.1	STIGMATELLA AURANTIACA DW4/3-1, COMPLETE GENOME	STIGMATELLA
-1.36352	DQ163917.1	BACTERIOPHAGE F8, COMPLETE GENOME. [24-FEB-2017]	UNKNOWN	NC_008009.1	CANDIDATUS KORIBACTER VERSATILIS ELLIN345, COMPLETE GENOME	CANDIDATUS
-1.29107	DQ203855.1	BURKHOLDERIA CEPACIA PHAGE BCEP176, COMPLETE GENOME. [26-MAY-2017]	BURKHOLDERIA	AP009386.1	BURKHOLDERIA MULTIVORANS ATCC 17616 GENOMIC DNA, COMPLETE GENOME, CHROMOSOME 2	BURKHOLDERIA
-1.32773	DQ222851.1	BACILLUS ANTHRACIS PHAGE CHERRY, COMPLETE GENOME. [25-AUG-2017]	BACILLUS	CP009300.1	BACILLUS CEREUS D17, COMPLETE GENOME	BACILLUS
-1.32778	DQ222853.1	BACILLUS ANTHRACIS PHAGE GAMMA ISOLATE 51, COMPLETE GENOME. [25-AUG-2017]	BACILLUS	CP009300.1	BACILLUS CEREUS D17, COMPLETE GENOME	BACILLUS
-1.3304	DQ222855.1	BACILLUS ANTHRACIS PHAGE GAMMA ISOLATE 53, COMPLETE GENOME. [25-AUG-2017]	BACILLUS	CP009300.1	BACILLUS CEREUS D17, COMPLETE GENOME	BACILLUS
-1.33515	DQ227763.1	LACTOCOCCUS PHAGE 712, COMPLETE GENOME. [25-AUG-2017]	LACTOCOCCUS	NC_015275.1	CLOSTRIDIUM LENTOCELLUM DSM 5427, COMPLETE GENOME	CLOSTRIDIUM
-1.34301	DQ227764.1	LACTOCOCCUS LACTIS PHAGE JJ50, COMPLETE GENOME. [25-AUG-2017]	LACTOCOCCUS	NC_018500.1	BACILLUS THURINGIENSIS HD-771, COMPLETE GENOME	BACILLUS
-1.3298	DQ289555.1	BACILLUS ANTHRACIS PHAGE W BETA, COMPLETE GENOME. [25-AUG-2017]	BACILLUS	CP009300.1	BACILLUS CEREUS D17, COMPLETE GENOME	BACILLUS
-1.3273	DQ289556.1	BACILLUS ANTHRACIS PHAGE GAMMA ISOLATE D'HERELLE, COMPLETE GENOME. [25-AUG-2017]	BACILLUS	CP009300.1	BACILLUS CEREUS D17, COMPLETE GENOME	BACILLUS
-1.29933	DQ320509.1	LACTOBACILLUS PHAGE KC5A, COMPLETE GENOME. [25-AUG-2017]	LACTOBACILLUS	NC_008530.1	LACTOBACILLUS GASSERI ATCC 33323, COMPLETE GENOME	LACTOBACILLUS
-1.37241	DQ340064.2	GEOBACILLUS PHAGE GBSV1, COMPLETE GENOME. [25-AUG-2017]	GEOBACILLUS	NC_015660.1	PARAGEOBACILLUS THERMOGLUCOSIDASIUS C56-YS93, COMPLETE GENOME	PARAGEOBACILLUS
-1.24084	DQ372923.1	BACTERIOPHAGE MU1/6, COMPLETE GENOME	UNKNOWN	NC_013929.1	STREPTOMYCES SCABIEI 87.22 COMPLETE GENOME	STREPTOMYCES
-1.36313	DQ386162.1	STREPTOCOCCUS PHAGE M102AD, COMPLETE GENOME. [26-MAY-2017]	STREPTOCOCCUS	NC_013798.1	STREPTOCOCCUS GALLOLYTICUS UCN34 COMPLETE GENOME	STREPTOCOCCUS
-1.31583	DQ394807.1	LACTOCOCCUS PHAGE UL36.K1T1, COMPLETE GENOME. [25-AUG-2017]	LACTOCOCCUS	NC_017486.1	LACTOCOCCUS LACTIS SUBSP. LACTIS CV56, COMPLETE GENOME	LACTOCOCCUS
-1.31585	DQ394809.1	LACTOCOCCUS PHAGE UL36.T1K1, COMPLETE GENOME. [25-AUG-2017]	LACTOCOCCUS	NC_017486.1	LACTOCOCCUS LACTIS SUBSP. LACTIS CV56, COMPLETE GENOME	LACTOCOCCUS
-1.31643	DQ394810.1	LACTOCOCCUS PHAGE PHISMQ86, COMPLETE GENOME. [25-AUG-2017]	LACTOCOCCUS	NC_017486.1	LACTOCOCCUS LACTIS SUBSP. LACTIS CV56, COMPLETE GENOME	LACTOCOCCUS
-1.33348	DQ398041.1	MYCOBACTERIOPHAGE 244, COMPLETE GENOME. [25-AUG-2017]	MYCOBACTERIUM	AP014547.1	MYCOBACTERIUM ABSCESSUS SUBSP. BOLLETII CCUG 48898 = JCM 15300 DNA, COMPLETE GENOME	MYCOBACTERIUM
-1.27968	DQ398042.2	MYCOBACTERIUM PHAGE HALO, COMPLETE GENOME. [25-AUG-2017]	MYCOBACTERIUM	NC_016604.1	MYCOBACTERIUM RHODESIAE NBB3, COMPLETE GENOME	MYCOBACTERIUM
-1.32117	DQ398043.1	MYCOBACTERIOPHAGE CHE12, COMPLETE GENOME. [25-AUG-2017]	MYCOBACTERIUM	NC_016604.1	MYCOBACTERIUM RHODESIAE NBB3, COMPLETE GENOME	MYCOBACTERIUM
-1.25745	DQ398044.1	MYCOBACTERIOPHAGE COOPER, COMPLETE GENOME. [26-MAY-2017]	MYCOBACTERIUM	NC_021191.1	ACTINOPLANES SP. N902-109, COMPLETE GENOME	ACTINOPLANES
-1.3433	DQ398045.1	MYCOBACTERIOPHAGE LLIJ, COMPLETE GENOME. [26-MAY-2017]	MYCOBACTERIUM	AP014547.1	MYCOBACTERIUM ABSCESSUS SUBSP. BOLLETII CCUG 48898 = JCM 15300 DNA, COMPLETE GENOME	MYCOBACTERIUM
-1.28116	DQ398046.1	MYCOBACTERIOPHAGE ORION, COMPLETE GENOME. [26-MAY-2017]	MYCOBACTERIUM	NC_018289.1	MYCOBACTERIUM SMEGMATIS STR. MC2 155, COMPLETE GENOME	MYCOBACTERIUM
-1.35192	DQ398047.1	MYCOBACTERIOPHAGE PBI1, COMPLETE GENOME. [26-MAY-2017]	MYCOBACTERIUM	CP009616.1	MYCOBACTERIUM ABSCESSUS STRAIN 4529, COMPLETE GENOME	MYCOBACTERIUM
-1.25884	DQ398048.1	MYCOBACTERIOPHAGE QYRZULA, COMPLETE GENOME. [26-MAY-2017]	MYCOBACTERIUM	NC_021191.1	ACTINOPLANES SP. N902-109, COMPLETE GENOME	ACTINOPLANES
-1.27134	DQ398049.1	MYCOBACTERIOPHAGE PIPEFISH, COMPLETE GENOME. [26-MAY-2017]	MYCOBACTERIUM	CP007219.1	AMYCOLATOPSIS LURIDA NRRL 2430, COMPLETE GENOME	AMYCOLATOPSIS
-1.34273	DQ398050.1	MYCOBACTERIOPHAGE PMC, COMPLETE GENOME. [26-MAY-2017]	MYCOBACTERIUM	AP014547.1	MYCOBACTERIUM ABSCESSUS SUBSP. BOLLETII CCUG 48898 = JCM 15300 DNA, COMPLETE GENOME	MYCOBACTERIUM
-1.3525	DQ398051.1	MYCOBACTERIOPHAGE PLOT, COMPLETE GENOME. [26-MAY-2017]	MYCOBACTERIUM	CP009616.1	MYCOBACTERIUM ABSCESSUS STRAIN 4529, COMPLETE GENOME	MYCOBACTERIUM
-1.37749	DQ398052.2	MYCOBACTERIOPHAGE WILDCAT, COMPLETE GENOME. [26-MAY-2017]	MYCOBACTERIUM	NC_014963.1	TERRIGLOBUS SAANENSIS SP1PR4, COMPLETE GENOME	TERRIGLOBUS
-1.29704	DQ398053.1	MYCOBACTERIOPHAGE CATERA, COMPLETE GENOME. [25-AUG-2017]	MYCOBACTERIUM	CP009914.1	MYCOBACTERIUM SP. VKM AC-1817D, COMPLETE GENOME	MYCOBACTERIUM
-1.29103	DQ426904.1	BACTERIOPHAGE PHI-MHAA1-PHL101, COMPLETE GENOME. [25-AUG-2017]	UNKNOWN	CP011099.1	MANNHEIMIA HAEMOLYTICA STRAIN 89010807N LKTA-, COMPLETE GENOME	MANNHEIMIA
-1.28945	DQ426905.1	BACTERIOPHAGE PHI-MHAA1-BAA410, COMPLETE GENOME. [25-AUG-2017]	UNKNOWN	CP011099.1	MANNHEIMIA HAEMOLYTICA STRAIN 89010807N LKTA-, COMPLETE GENOME	MANNHEIMIA
-1.37646	DQ431235.1	PROPIONIBACTERIUM PHAGE PA6, COMPLETE GENOME. [26-MAY-2017]	PROPIONIBACTERIUM	NC_022198.1	CORYNEBACTERIUM ARGENTORATENSE DSM 44202, COMPLETE GENOME	CORYNEBACTERIUM
-1.36945	DQ453159.1	GEOBACILLUS VIRUS E2, COMPLETE GENOME	GEOBACILLUS	NC_015660.1	PARAGEOBACILLUS THERMOGLUCOSIDASIUS C56-YS93, COMPLETE GENOME	PARAGEOBACILLUS
-1.2693	DQ466086.1	CLOSTRIDIUM PHAGE PHIC2, COMPLETE GENOME. [25-AUG-2017]	CLOSTRIDIUM	NC_009089.1	CLOSTRIDIOIDES DIFFICILE 630, COMPLETE GENOME	CLOSTRIDIOIDES
-1.35175	DQ490056.1	LACTOCOCCUS PHAGE Q54, COMPLETE GENOME. [25-AUG-2017]	LACTOCOCCUS	NC_021840.1	LISTERIA MONOCYTOGENES STRAIN J1926, COMPLETE GENOME	LISTERIA
-1.39671	DQ499600.1	CORYNEBACTERIUM PHAGE P1201, COMPLETE GENOME. [26-MAY-2017]	CORYNEBACTERIUM	CP001825.1	THERMOBACULUM TERRENUM ATCC BAA-798 CHROMOSOME 1, COMPLETE SEQUENCE	THERMOBACULUM
-1.35087	DQ500118.1	RHIZOBIUM PHAGE 16-3, COMPLETE GENOME. [25-AUG-2017]	RHIZOBIUM	HG916852.1	RHIZOBIUM SP. LPU83 MAIN CHROSOME COMPLETE GENOME	RHIZOBIUM
-1.29941	DQ517338.1	STAPHYLOCOCCUS PHAGE 80ALPHA, COMPLETE SEQUENCE	STAPHYLOCOCCUS	NC_009641.1	STAPHYLOCOCCUS AUREUS SUBSP. AUREUS STR. NEWMAN DNA, COMPLETE GENOME	STAPHYLOCOCCUS
-1.37261	DQ529280.1	AEROMONAS SALMONICIDA BACTERIOPHAGE 25, COMPLETE GENOME. [25-AUG-2017]	AEROMONAS	NC_015277.1	SPHINGOBACTERIUM SP. 21, COMPLETE GENOME	SPHINGOBACTERIUM
-1.288	DQ530359.1	STAPHYLOCOCCUS AUREUS PHAGE PHINM1, COMPLETE GENOME. [25-AUG-2017]	STAPHYLOCOCCUS	NC_009641.1	STAPHYLOCOCCUS AUREUS SUBSP. AUREUS STR. NEWMAN DNA, COMPLETE GENOME	STAPHYLOCOCCUS
-1.2829	DQ530360.1	STAPHYLOCOCCUS AUREUS PHAGE PHINM2, COMPLETE GENOME. [25-AUG-2017]	STAPHYLOCOCCUS	NC_009641.1	STAPHYLOCOCCUS AUREUS SUBSP. AUREUS STR. NEWMAN DNA, COMPLETE GENOME	STAPHYLOCOCCUS
-1.31189	DQ530361.1	STAPHYLOCOCCUS AUREUS PHAGE PHINM3, COMPLETE GENOME. [25-AUG-2017]	STAPHYLOCOCCUS	NC_017342.1	STAPHYLOCOCCUS AUREUS SUBSP. AUREUS TCH60, COMPLETE GENOME	STAPHYLOCOCCUS
-1.28436	DQ530362.1	STAPHYLOCOCCUS AUREUS PHAGE PHINM4, COMPLETE GENOME. [26-MAY-2017]	STAPHYLOCOCCUS	NC_009641.1	STAPHYLOCOCCUS AUREUS SUBSP. AUREUS STR. NEWMAN DNA, COMPLETE GENOME	STAPHYLOCOCCUS
-1.34372	DQ535032.1	LACTOCOCCUS LACTIS PHAGE KSY1, COMPLETE GENOME. [26-MAY-2017]	LACTOCOCCUS	NC_015275.1	CLOSTRIDIUM LENTOCELLUM DSM 5427, COMPLETE GENOME	CLOSTRIDIUM
-1.29647	DQ631426.1	PSEUDOMONAS PHAGE DMS3, COMPLETE GENOME	PSEUDOMONAS	CP011317.1	PSEUDOMONAS AERUGINOSA STRAIN CARB01 63, COMPLETE GENOME	PSEUDOMONAS
-1.31212	DQ674738.2	AEROMONAS PHAGE PHIO18P, COMPLETE GENOME. [25-AUG-2017]	AEROMONAS	CP007576.1	AEROMONAS HYDROPHILA PC104A, COMPLETE GENOME	AEROMONAS
-1.39152	DQ777876.1	XANTHOMONAS PHAGE XOP411, COMPLETE GENOME. [26-MAY-2017]	XANTHOMONAS	CP007142.1	GYNUELLA SUNSHINYII YC6258, COMPLETE GENOME	GYNUELLA
-1.37094	DQ785801.1	SODALIS PHAGE PHISG1, COMPLETE GENOME	SODALIS	NC_013592.1	DICKEYA ZEAE ECH586, COMPLETE GENOME	DICKEYA
-1.34095	DQ831957.1	STAPHYLOCOCCUS PHAGE CNPH82, COMPLETE GENOME. [25-AUG-2017]	STAPHYLOCOCCUS	NC_009632.1	STAPHYLOCOCCUS AUREUS SUBSP. AUREUS JH1, COMPLETE GENOME	STAPHYLOCOCCUS
-1.3824	DQ832317.1	ESCHERICHIA COLI BACTERIOPHAGE RV5, COMPLETE SEQUENCE	ESCHERICHIA	CP009279.1	PAENIBACILLUS SP. FSL H7-0737, COMPLETE GENOME	PAENIBACILLUS
-1.34204	DQ834250.1	STAPHYLOCOCCUS PHAGE PH15, COMPLETE GENOME. [25-AUG-2017]	STAPHYLOCOCCUS	NC_009487.1	STAPHYLOCOCCUS AUREUS SUBSP. AUREUS JH9, COMPLETE GENOME	STAPHYLOCOCCUS
-1.40546	DQ836063.1	PSEUDOMONAS PHAGE PRR1, COMPLETE GENOME. [13-NOV-2015]	PSEUDOMONAS	NC_017934.1	MESOTOGA PRIMA MESG1.AG.4.2, COMPLETE GENOME	MESOTOGA
-1.37254	DQ840344.2	BACILLUS VIRUS 1, COMPLETE GENOME	BACILLUS	NC_015660.1	PARAGEOBACILLUS THERMOGLUCOSIDASIUS C56-YS93, COMPLETE GENOME	PARAGEOBACILLUS
-1.32275	DQ864624.1	STREPTOCOCCUS PHAGE P9, COMPLETE GENOME. [25-AUG-2017]	STREPTOCOCCUS	CP007041.1	STREPTOCOCCUS PYOGENES STAB902, COMPLETE GENOME	STREPTOCOCCUS
-1.30244	DQ873690.1	PHAGE MP22, COMPLETE GENOME	PHAGE	CP011317.1	PSEUDOMONAS AERUGINOSA STRAIN CARB01 63, COMPLETE GENOME	PSEUDOMONAS
-1.39486	DQ875742.1	CYANOPHAGE PF-WMP4, COMPLETE GENOME. [26-MAY-2017]	CYANOPHAGE	NC_019738.1	MICROCOLEUS SP. PCC 7113, COMPLETE GENOME	MICROCOLEUS
-1.3445	DQ904452.1	BACTERIOPHAGE RB32, COMPLETE GENOME. [25-AUG-2017]	UNKNOWN	AP014583.1	WINOGRADSKYELLA SP. PG-2 DNA, COMPLETE GENOME	WINOGRADSKYELLA
-1.31514	DQ908929.1	STAPHYLOCOCCUS PHAGE 80, COMPLETE GENOME. [26-MAY-2017]	STAPHYLOCOCCUS	NC_009487.1	STAPHYLOCOCCUS AUREUS SUBSP. AUREUS JH9, COMPLETE GENOME	STAPHYLOCOCCUS
-1.31951	DQ997624.1	THERMUS THERMOPHILUS PHAGE YS40, COMPLETE GENOME. [26-MAY-2017]	THERMUS	NC_014393.1	CLOSTRIDIUM CELLULOVORANS 743B, COMPLETE GENOME	CLOSTRIDIUM
-1.37177	EF056009.1	ENTEROBACTERIA PHAGE N4, COMPLETE GENOME. [26-MAY-2017]	ENTEROBACTERIA	NC_010628.1	NOSTOC PUNCTIFORME PCC 73102, COMPLETE GENOME	NOSTOC
-1.35619	EF057797.1	VIBRIO PHAGE VP882, COMPLETE GENOME. [25-AUG-2017]	VIBRIO	CP007441.1	PSEUDOMONAS STUTZERI STRAIN 28A24, COMPLETE GENOME	PSEUDOMONAS
-1.40282	EF068134.1	ENTEROBACTERIA PHAGE FI 4184 B, COMPLETE GENOME. [24-FEB-2017]	ENTEROBACTERIA	CP002783.1	SINORHIZOBIUM MELILOTI AK83 CHROMOSOME 3, COMPLETE SEQUENCE	SINORHIZOBIUM
-1.36108	EF116926.2	STREPTOCOCCUS PHAGE SMP, COMPLETE GENOME. [25-AUG-2017]	STREPTOCOCCUS	NC_015433.1	STREPTOCOCCUS SUIS ST3, COMPLETE GENOME	STREPTOCOCCUS
-1.30112	EF136589.1	STAPHYLOCOCCUS PHAGE 812 STRAIN PHI812 PUTATIVE EXONUCLEASE, HYPOTHETICAL PROTEIN, PUTATIVE NUCLEASE, HYPOTHETICAL PROTEIN, PUTATIVE PRIMASE, HYPOTHETICAL PROTEINS, PUTATIVE RIBONUCLEOTIDE REDUCTION-RELATED PROTEIN, PUTATIVE RIBONUCLEOTIDE REDUCTASE LARGE SUBUNIT, PUTATIVE RIBONUCLEOTIDE REDUCTASE MINOR SUBUNIT, HYPOTHETICAL PROTEIN, PUTATIVE	STAPHYLOCOCCUS	NC_020291.1	CLOSTRIDIUM SACCHAROPERBUTYLACETONICUM N1-4(HMT), COMPLETE GENOME	CLOSTRIDIUM
-1.34771	EF153632.1	BURKHOLDERIA AMBIFARIA PHAGE BCEPF1, COMPLETE GENOME. [25-AUG-2017]	BURKHOLDERIA	NC_015717.1	HYPHOMICROBIUM SP. MC1 CHROMOSOME, COMPLETE GENOME	HYPHOMICROBIUM
-1.39216	EF160123.1	ERWINIA AMYLOVORA PHAGE ERA103, COMPLETE GENOME. [26-MAY-2017]	ERWINIA	CP009621.1	PONTIBACTER KORLENSIS STRAIN X14-1T, COMPLETE GENOME	PONTIBACTER
-1.39249	EF177456.2	SALMONELLA PHAGE SETP3, COMPLETE GENOME. [25-AUG-2017]	SALMONELLA	CP009090.1	SALMONELLA ENTERICA SUBSP. ENTERICA SEROVAR ENTERITIDIS STRAIN OLF-SE8-1021710, COMPLETE GENOME	SALMONELLA
-1.33528	EF207558.1	STREPTOCOCCUS PHAGE PHI3396, COMPLETE GENOME. [25-AUG-2017]	STREPTOCOCCUS	NC_004070.1	STREPTOCOCCUS PYOGENES MGAS315, COMPLETE GENOME	STREPTOCOCCUS
-1.38038	EF372997.1	CYANOPHAGE SYN5, COMPLETE GENOME. [26-MAY-2017]	CYANOPHAGE	NC_017506.1	MARINOBACTER ADHAERENS HP15, COMPLETE GENOME	MARINOBACTER
-1.35114	EF432053.1	ACIDIANUS BOTTLE-SHAPED VIRUS, COMPLETE GENOME	ACIDIANUS	NC_010001.1	LACHNOCLOSTRIDIUM PHYTOFERMENTANS ISDG, COMPLETE GENOME	LACHNOCLOSTRIDIUM
-1.37514	EF437941.1	ENTEROBACTERIA PHAGE PHI1, COMPLETE GENOME. [25-AUG-2017]	ENTEROBACTERIA	NC_015277.1	SPHINGOBACTERIUM SP. 21, COMPLETE GENOME	SPHINGOBACTERIUM
-1.38408	EF455602.1	LACTOBACILLUS PHAGE LL-H, COMPLETE GENOME. [25-AUG-2017]	LACTOBACILLUS	NC_017469.1	LACTOBACILLUS DELBRUECKII SUBSP. BULGARICUS 2038, COMPLETE GENOME	LACTOBACILLUS
-1.3829	EF460875.1	ENTEROBACTERIA PHAGE PHIECOM-GJ1, COMPLETE GENOME. [26-MAY-2017]	ENTEROBACTERIA	NC_013166.1	KANGIELLA KOREENSIS DSM 16069, COMPLETE GENOME	KANGIELLA
-1.30587	EF462197.1	STAPHYLOCOCCUS PHAGE TP310-1, COMPLETE SEQUENCE	STAPHYLOCOCCUS	CP007454.1	STAPHYLOCOCCUS AUREUS STRAIN 502A, COMPLETE GENOME	STAPHYLOCOCCUS
-1.30019	EF462198.1	STAPHYLOCOCCUS PHAGE TP310-2, COMPLETE SEQUENCE	STAPHYLOCOCCUS	NC_018608.1	STAPHYLOCOCCUS AUREUS 08BA02176, COMPLETE GENOME	STAPHYLOCOCCUS
-1.30116	EF462199.1	STAPHYLOCOCCUS PHAGE TP310-3, COMPLETE SEQUENCE	STAPHYLOCOCCUS	CP007454.1	STAPHYLOCOCCUS AUREUS STRAIN 502A, COMPLETE GENOME	STAPHYLOCOCCUS
-1.36749	EF469154.1	ENTEROBACTERIA PHAGE JS98, COMPLETE GENOME. [25-AUG-2017]	ENTEROBACTERIA	NC_017770.1	SOLITALEA CANADENSIS DSM 3403, COMPLETE GENOME	SOLITALEA
-1.23328	EF506570.1	SPIROPLASMA KUNKELII VIRUS SKV1_CR2-3X, COMPLETE GENOME	SPIROPLASMA	CP005074.1	SPIROPLASMA TAIWANENSE CT-1, COMPLETE GENOME	SPIROPLASMA
-1.36512	EF523948.1	BURKHOLDERIA PHAGE BCEPGOMR, COMPLETE GENOME. [26-MAY-2017]	BURKHOLDERIA	NC_015717.1	HYPHOMICROBIUM SP. MC1 CHROMOSOME, COMPLETE GENOME	HYPHOMICROBIUM
-1.37025	EF529515.1	STREPTOCOCCUS PHAGE 858, COMPLETE GENOME. [25-AUG-2017]	STREPTOCOCCUS	NC_013798.1	STREPTOCOCCUS GALLOLYTICUS UCN34 COMPLETE GENOME	STREPTOCOCCUS
-1.34286	EF536069.1	MYCOBACTERIUM PHAGE TWEETY, COMPLETE GENOME. [26-MAY-2017]	MYCOBACTERIUM	AP014547.1	MYCOBACTERIUM ABSCESSUS SUBSP. BOLLETII CCUG 48898 = JCM 15300 DNA, COMPLETE GENOME	MYCOBACTERIUM
-1.38983	EF537008.1	PHORMIDIUM PHAGE PF-WMP3, COMPLETE GENOME. [26-MAY-2017]	PHORMIDIUM	FM954972.2	VIBRIO SPLENDIDUS LGP32 CHROMOSOME 1	VIBRIO
-1.28249	EF579802.1	MICROBACTERIUM PHAGE MIN1, COMPLETE GENOME. [26-MAY-2017]	MICROBACTERIUM	CP003949.1	RHODOCOCCUS OPACUS PD630, COMPLETE GENOME	RHODOCOCCUS
-1.37666	EF583821.1	BACILLUS PHAGE 0305PHI8-36, COMPLETE GENOME. [25-AUG-2017]	BACILLUS	CP010976.1	PAENIBACILLUS SP. IHBB 10380, COMPLETE GENOME	PAENIBACILLUS
-1.29577	EF602154.1	BURKHOLDERIA PHAGE BCEPNY3, COMPLETE GENOME. [25-AUG-2017]	BURKHOLDERIA	CP000151.1	BURKHOLDERIA LATA STRAIN 383 CHROMOSOME 1, COMPLETE SEQUENCE	BURKHOLDERIA
-1.21424	EF694685.1	CAMPYLOBACTER PHAGE CGC-2007 ISOLATE CJ00-2425 CJE0217 GENE, PARTIAL CDS; CJE0218, CJE0219, CJE0220, CJE0221, CJE0222, CJE0223, CJE0224, CJE0225, CJE0226, CJE0227, CJE0228, CJE0229, CJE0230, AND CJE0231 GENES, COMPLETE CDS; AND CJE0232 GENE, PARTIAL CDS	CAMPYLOBACTER	CP005081.1	CAMPYLOBACTER JEJUNI SUBSP. JEJUNI R14, COMPLETE GENOME	CAMPYLOBACTER
-1.21398	EF694686.1	CAMPYLOBACTER PHAGE CGC-2007 ISOLATE CJ00-2538 CJE0217 GENE, PARTIAL CDS; CJE0218, CJE0219, CJE0220, CJE0221, CJE0222, CJE0223, CJE0224, CJE0225, CJE0226, CJE0227, CJE0228, CJE0229, CJE0230, AND CJE0231 GENES, COMPLETE CDS; AND CJE0232 GENE, PARTIAL CDS	CAMPYLOBACTER	CP005081.1	CAMPYLOBACTER JEJUNI SUBSP. JEJUNI R14, COMPLETE GENOME	CAMPYLOBACTER
-1.36385	EU030938.1	SULFOLOBUS SPINDLE-SHAPED VIRUS 4, COMPLETE GENOME	SULFOLOBUS	NC_012726.1	SULFOLOBUS ISLANDICUS M.16.4, COMPLETE GENOME	SULFOLOBUS
-1.36577	EU030939.1	SULFOLOBUS SPINDLE-SHAPED VIRUS 5, COMPLETE GENOME	SULFOLOBUS	NC_012726.1	SULFOLOBUS ISLANDICUS M.16.4, COMPLETE GENOME	SULFOLOBUS
-1.32762	EU078592.1	ENTEROBACTERIA PHAGE DE3, COMPLETE GENOME. [25-AUG-2017]	ENTEROBACTERIA	NC_012971.2	ESCHERICHIA COLI BL21(DE3), COMPLETE GENOME	ESCHERICHIA
-1.32638	EU081845.1	LACTOCOCCUS PHAGE 1706, COMPLETE GENOME. [25-AUG-2017]	LACTOCOCCUS	NC_020291.1	CLOSTRIDIUM SACCHAROPERBUTYLACETONICUM N1-4(HMT), COMPLETE GENOME	CLOSTRIDIUM
-1.37024	EU100883.1	THERMUS PHAGE P23-45, COMPLETE GENOME. [25-AUG-2017]	THERMUS	NC_013385.1	AMMONIFEX DEGENSII KC4, COMPLETE GENOME	AMMONIFEX
-1.37088	EU100884.1	THERMUS PHAGE P74-26, COMPLETE GENOME. [25-AUG-2017]	THERMUS	NC_013385.1	AMMONIFEX DEGENSII KC4, COMPLETE GENOME	AMMONIFEX
-1.34962	EU124666.1	THALASSOMONAS PHAGE BA3, COMPLETE GENOME. [26-MAY-2017]	THALASSOMONAS	NC_003910.7	COLWELLIA PSYCHRERYTHRAEA 34H, COMPLETE GENOME	COLWELLIA
-1.29477	EU136189.1	STAPHYLOCOCCUS PHAGE SAP-2, COMPLETE GENOME. [26-MAY-2017]	STAPHYLOCOCCUS	CP007447.1	STAPHYLOCOCCUS AUREUS STRAIN XN108, COMPLETE GENOME	STAPHYLOCOCCUS
-1.38827	EU197055.1	PSEUDOMONAS PHAGE 201PHI2-1, COMPLETE GENOME. [26-MAY-2017]	PSEUDOMONAS	CP003241.1	VIBRIO SP. EJY3 CHROMOSOME 1, COMPLETE SEQUENCE	VIBRIO
-1.2814	EU203571.2	MYCOBACTERIUM PHAGE GILES, COMPLETE GENOME. [26-MAY-2017]	MYCOBACTERIUM	NC_017904.1	MYCOBACTERIUM SP. MOTT36Y, COMPLETE GENOME	MYCOBACTERIUM
-1.34223	EU221285.1	LACTOCOCCUS PHAGE BIBB29, COMPLETE GENOME. [25-AUG-2017]	LACTOCOCCUS	NC_019425.2	CARNOBACTERIUM MALTAROMATICUM LMA28 COMPLETE GENOME	CARNOBACTERIUM
-1.33873	EU236438.1	PSEUDOMONAS PHAGE PT2, COMPLETE GENOME. [26-MAY-2017]	PSEUDOMONAS	NC_022738.1	PSEUDOMONAS SP. VLB120, COMPLETE GENOME	PSEUDOMONAS
-1.36696	EU246945.1	LACTOBACILLUS PHAGE LRM1, COMPLETE SEQUENCE	LACTOBACILLUS	NC_013199.1	LACTOBACILLUS RHAMNOSUS LC 705 WHOLE GENOME SEQUENCE, STRAIN LC 705	LACTOBACILLUS
-1.29465	EU272036.1	PSEUDOMONAS PHAGE MP29, COMPLETE GENOME. [26-MAY-2017]	PSEUDOMONAS	NC_011770.1	PSEUDOMONAS AERUGINOSA LESB58 COMPLETE GENOME SEQUENCE	PSEUDOMONAS
-1.29985	EU272037.1	PSEUDOMONAS PHAGE MP38, COMPLETE GENOME. [26-MAY-2017]	PSEUDOMONAS	CP011317.1	PSEUDOMONAS AERUGINOSA STRAIN CARB01 63, COMPLETE GENOME	PSEUDOMONAS
-1.33604	EU311208.1	ENTEROBACTERIA PHAGE MIN27, COMPLETE GENOME. [26-MAY-2017]	ENTEROBACTERIA	CP008957.1	ESCHERICHIA COLI O157:H7 STR. EDL933, COMPLETE GENOME	ESCHERICHIA
-1.37837	EU330206.1	ENTEROBACTERIA PHAGE PHIECO32, COMPLETE GENOME. [25-AUG-2017]	ENTEROBACTERIA	CP010976.1	PAENIBACILLUS SP. IHBB 10380, COMPLETE GENOME	PAENIBACILLUS
-1.37774	EU340421.2	LACTOBACILLUS PHAGE C5, COMPLETE GENOME. [25-AUG-2017]	LACTOBACILLUS	CP009281.1	PAENIBACILLUS SP. FSL R5-0345, COMPLETE GENOME	PAENIBACILLUS
-1.35035	EU399241.1	HALOMONAS PHAGE PHIHAP-1, COMPLETE GENOME. [25-AUG-2017]	HALOMONAS	CP007441.1	PSEUDOMONAS STUTZERI STRAIN 28A24, COMPLETE GENOME	PSEUDOMONAS
-1.35627	EU408779.1	BACILLUS PHAGE AP50, COMPLETE GENOME. [25-AUG-2017]	BACILLUS	CP000817.1	LYSINIBACILLUS SPHAERICUS C3-41, COMPLETE GENOME	LYSINIBACILLUS
-1.38199	EU409559.1	LACTOBACILLUS PHAGE JCL1032, COMPLETE GENOME. [26-MAY-2017]	LACTOBACILLUS	NC_017470.1	LACTOBACILLUS AMYLOVORUS GRL1118, COMPLETE GENOME	LACTOBACILLUS
-1.30217	EU418428.2	STAPHYLOCOCCUS PHAGE A5W, COMPLETE GENOME. [25-AUG-2017]	STAPHYLOCOCCUS	FN665652.1	CLOSTRIDIUM DIFFICILE COMPLETE GENOME, STRAIN CF5	CLOSTRIDIUM
-1.32588	EU438902.1	LACTOCOCCUS PHAGE ASCCPHI28, COMPLETE GENOME. [26-MAY-2017]	LACTOCOCCUS	NC_013656.1	LACTOCOCCUS LACTIS SUBSP. LACTIS KF147, COMPLETE GENOME	LACTOCOCCUS
-1.34795	EU545650.1	ACIDIANUS FILAMENTOUS VIRUS 9, COMPLETE GENOME	ACIDIANUS	NC_012726.1	SULFOLOBUS ISLANDICUS M.16.4, COMPLETE GENOME	SULFOLOBUS
-1.3945	EU547803.1	SALMONELLA PHAGE PHISG-JL2, COMPLETE GENOME. [25-AUG-2017]	SALMONELLA	NC_014008.1	CORALIOMARGARITA AKAJIMENSIS DSM 45221, COMPLETE GENOME	CORALIOMARGARITA
-1.2808	EU568876.1	MYCOBACTERIUM PHAGE BPS, COMPLETE GENOME. [25-AUG-2017]	MYCOBACTERIUM	NC_019966.1	MYCOBACTERIUM SP. JS623, COMPLETE GENOME	MYCOBACTERIUM
-1.37357	EU570103.1	SALMONELLA PHAGE EPSILON34, COMPLETE GENOME. [25-AUG-2017]	SALMONELLA	CP009559.1	SALMONELLA ENTERICA SUBSP. ENTERICA SEROVAR PARATYPHI A STRAIN CMCC 50503, COMPLETE GENOME	SALMONELLA
-1.29802	EU588980.1	CLOSTRIDIUM PHAGE 39-O, COMPLETE GENOME. [25-AUG-2017]	CLOSTRIDIUM	NC_020291.1	CLOSTRIDIUM SACCHAROPERBUTYLACETONICUM N1-4(HMT), COMPLETE GENOME	CLOSTRIDIUM
-1.39316	EU652770.3	MORGANELLA PHAGE MMP1, COMPLETE GENOME. [25-AUG-2017]	MORGANELLA	CP002122.1	PREVOTELLA MELANINOGENICA ATCC 25845 CHROMOSOME I, COMPLETE SEQUENCE	PREVOTELLA
-1.37892	EU710883.1	ERWINIA PHAGE PHIEA21-4, COMPLETE GENOME. [25-AUG-2017]	ERWINIA	NC_017595.1	STREPTOCOCCUS SALIVARIUS JIM8777 COMPLETE GENOME	STREPTOCOCCUS
-1.36609	EU716414.1	PSEUDOMONAS PHAGE PB1, COMPLETE GENOME	PSEUDOMONAS	NC_008009.1	CANDIDATUS KORIBACTER VERSATILIS ELLIN345, COMPLETE GENOME	CANDIDATUS
-1.39705	EU717894.1	XANTHOMONAS PHAGE PHIL7, COMPLETE GENOME. [26-MAY-2017]	XANTHOMONAS	NC_015673.1	CORYNEBACTERIUM RESISTENS DSM 45100, COMPLETE GENOME	CORYNEBACTERIUM
-1.27567	EU719189.1	CLOSTRIDIUM PHAGE PHICD27, COMPLETE GENOME. [25-AUG-2017]	CLOSTRIDIUM	NC_009089.1	CLOSTRIDIOIDES DIFFICILE 630, COMPLETE GENOME	CLOSTRIDIOIDES
-1.39396	EU734170.1	YERSINIA PHAGE YEPE2, COMPLETE GENOME. [25-AUG-2017]	YERSINIA	CP002122.1	PREVOTELLA MELANINOGENICA ATCC 25845 CHROMOSOME I, COMPLETE SEQUENCE	PREVOTELLA
-1.394	EU734171.1	ENTEROBACTERIA PHAGE BA14, COMPLETE GENOME. [25-AUG-2017]	ENTEROBACTERIA	CP002122.1	PREVOTELLA MELANINOGENICA ATCC 25845 CHROMOSOME I, COMPLETE SEQUENCE	PREVOTELLA
-1.40013	EU734172.1	ENTEROBACTERIA PHAGE ECODS1, COMPLETE GENOME. [26-MAY-2017]	ENTEROBACTERIA	CP002122.1	PREVOTELLA MELANINOGENICA ATCC 25845 CHROMOSOME I, COMPLETE SEQUENCE	PREVOTELLA
-1.39577	EU734173.1	KLEBSIELLA PHAGE K11, COMPLETE GENOME. [25-AUG-2017]	KLEBSIELLA	CP008913.1	CORYNEBACTERIUM SP. ATCC 6931, COMPLETE GENOME	CORYNEBACTERIUM
-1.39878	EU734174.1	ENTEROBACTERIA PHAGE 13A, COMPLETE GENOME. [25-AUG-2017]	ENTEROBACTERIA	NC_013203.1	ATOPOBIUM PARVULUM DSM 20469, COMPLETE GENOME	ATOPOBIUM
-1.32686	EU744248.1	MYCOBACTERIUM PHAGE KBG, COMPLETE GENOME. [25-AUG-2017]	MYCOBACTERIUM	NC_016604.1	MYCOBACTERIUM RHODESIAE NBB3, COMPLETE GENOME	MYCOBACTERIUM
-1.32628	EU744249.1	MYCOBACTERIUM PHAGE LOCKLEY, COMPLETE GENOME. [25-AUG-2017]	MYCOBACTERIUM	NC_016604.1	MYCOBACTERIUM RHODESIAE NBB3, COMPLETE GENOME	MYCOBACTERIUM
-1.32153	EU744250.1	MYCOBACTERIUM PHAGE PUKOVNIK, COMPLETE GENOME. [25-AUG-2017]	MYCOBACTERIUM	NC_016604.1	MYCOBACTERIUM RHODESIAE NBB3, COMPLETE GENOME	MYCOBACTERIUM
-1.32315	EU744251.1	MYCOBACTERIUM PHAGE JASPER, COMPLETE GENOME. [25-AUG-2017]	MYCOBACTERIUM	NC_016604.1	MYCOBACTERIUM RHODESIAE NBB3, COMPLETE GENOME	MYCOBACTERIUM
-1.32693	EU744252.1	MYCOBACTERIUM PHAGE DD5, COMPLETE GENOME. [25-AUG-2017]	MYCOBACTERIUM	NC_016604.1	MYCOBACTERIUM RHODESIAE NBB3, COMPLETE GENOME	MYCOBACTERIUM
-1.27132	EU770221.1	MYCOBACTERIUM PHAGE NIGEL, COMPLETE GENOME. [26-MAY-2017]	MYCOBACTERIUM	NC_021191.1	ACTINOPLANES SP. N902-109, COMPLETE GENOME	ACTINOPLANES
-1.35577	EU770222.1	MYCOBACTERIUM PHAGE PREDATOR, COMPLETE GENOME. [26-MAY-2017]	MYCOBACTERIUM	NC_008009.1	CANDIDATUS KORIBACTER VERSATILIS ELLIN345, COMPLETE GENOME	CANDIDATUS
-1.37725	EU771092.1	BACILLUS PHAGE PHI29, COMPLETE GENOME. [25-AUG-2017]	BACILLUS	CP010976.1	PAENIBACILLUS SP. IHBB 10380, COMPLETE GENOME	PAENIBACILLUS
-1.37094	EU794049.1	BACTERIOPHAGE APSE-2, COMPLETE GENOME. [25-AUG-2017]	UNKNOWN	FO704551.1	XENORHABDUS POINARII STR. G6 CHROMOSOME, COMPLETE GENOME	XENORHABDUS
-1.33505	EU816588.1	MYCOBACTERIUM PHAGE PORKY, COMPLETE GENOME. [25-AUG-2017]	MYCOBACTERIUM	AP014547.1	MYCOBACTERIUM ABSCESSUS SUBSP. BOLLETII CCUG 48898 = JCM 15300 DNA, COMPLETE GENOME	MYCOBACTERIUM
-1.26849	EU816589.1	MYCOBACTERIUM PHAGE PHAEDRUS, COMPLETE GENOME. [26-MAY-2017]	MYCOBACTERIUM	CP007219.1	AMYCOLATOPSIS LURIDA NRRL 2430, COMPLETE GENOME	AMYCOLATOPSIS
-1.34487	EU816590.1	MYCOBACTERIUM PHAGE BOOMER, COMPLETE GENOME. [26-MAY-2017]	MYCOBACTERIUM	AP014547.1	MYCOBACTERIUM ABSCESSUS SUBSP. BOLLETII CCUG 48898 = JCM 15300 DNA, COMPLETE GENOME	MYCOBACTERIUM
-1.33341	EU816591.1	MYCOBACTERIUM PHAGE KOSTYA, COMPLETE GENOME. [25-AUG-2017]	MYCOBACTERIUM	AP014547.1	MYCOBACTERIUM ABSCESSUS SUBSP. BOLLETII CCUG 48898 = JCM 15300 DNA, COMPLETE GENOME	MYCOBACTERIUM
-1.30837	EU822883.1	BURKHOLDERIA PHAGE KS10, COMPLETE GENOME. [26-MAY-2017]	BURKHOLDERIA	NC_023018.2	PANDORAEA PNOMENUSA, COMPLETE GENOME	PANDORAEA
-1.28286	EU826466.1	MYCOBACTERIUM PHAGE MYRNA, COMPLETE GENOME. [25-AUG-2017]	MYCOBACTERIUM	NC_013131.1	CATENULISPORA ACIDIPHILA DSM 44928, COMPLETE GENOME	CATENULISPORA
-1.29706	EU826467.1	MYCOBACTERIUM PHAGE RIZAL, COMPLETE GENOME. [25-AUG-2017]	MYCOBACTERIUM	CP009914.1	MYCOBACTERIUM SP. VKM AC-1817D, COMPLETE GENOME	MYCOBACTERIUM
-1.29669	EU826468.1	MYCOBACTERIUM PHAGE SPUD, COMPLETE GENOME. [25-AUG-2017]	MYCOBACTERIUM	CP009914.1	MYCOBACTERIUM SP. VKM AC-1817D, COMPLETE GENOME	MYCOBACTERIUM
-1.29607	EU826469.1	MYCOBACTERIUM PHAGE SCOTTMCG, COMPLETE GENOME. [25-AUG-2017]	MYCOBACTERIUM	CP009914.1	MYCOBACTERIUM SP. VKM AC-1817D, COMPLETE GENOME	MYCOBACTERIUM
-1.29609	EU826469.2	MYCOBACTERIUM PHAGE SCOTTMCG, COMPLETE GENOME	MYCOBACTERIUM	CP009914.1	MYCOBACTERIUM SP. VKM AC-1817D, COMPLETE GENOME	MYCOBACTERIUM
-1.32143	EU826470.1	MYCOBACTERIUM PHAGE SOLON, COMPLETE GENOME. [25-AUG-2017]	MYCOBACTERIUM	CP009914.1	MYCOBACTERIUM SP. VKM AC-1817D, COMPLETE GENOME	MYCOBACTERIUM
-1.29748	EU826471.1	MYCOBACTERIUM PHAGE CALI, COMPLETE GENOME. [25-AUG-2017]	MYCOBACTERIUM	CP009914.1	MYCOBACTERIUM SP. VKM AC-1817D, COMPLETE GENOME	MYCOBACTERIUM
-1.3314	EU849489.1	STENOTROPHOMONAS PHAGE S1, COMPLETE GENOME. [25-AUG-2017]	STENOTROPHOMONAS	NC_017671.1	STENOTROPHOMONAS MALTOPHILIA D457 COMPLETE GENOME	STENOTROPHOMONAS
-1.37194	EU855793.1	LISTERIA PHAGE P40, COMPLETE GENOME. [25-AUG-2017]	LISTERIA	CP009278.1	SPHINGOBACTERIUM SP. ML3W, COMPLETE GENOME	SPHINGOBACTERIUM
-1.3199	EU861004.1	STAPHYLOCOCCUS PHAGE PHISAUS-IPLA88, COMPLETE GENOME. [25-AUG-2017]	STAPHYLOCOCCUS	NC_009487.1	STAPHYLOCOCCUS AUREUS SUBSP. AUREUS JH9, COMPLETE GENOME	STAPHYLOCOCCUS
-1.29679	EU861005.1	STAPHYLOCOCCUS PHAGE PHISAUS-IPLA35, COMPLETE GENOME. [25-AUG-2017]	STAPHYLOCOCCUS	NC_002953.3	STAPHYLOCOCCUS AUREUS STRAIN MSSA476, COMPLETE GENOME	STAPHYLOCOCCUS
-1.37512	EU863408.1	ENTEROBACTERIA PHAGE JSE, COMPLETE GENOME. [25-AUG-2017]	ENTEROBACTERIA	NC_015277.1	SPHINGOBACTERIUM SP. 21, COMPLETE GENOME	SPHINGOBACTERIUM
-1.36684	EU863409.1	ENTEROBACTERIA PHAGE JS10, COMPLETE SEQUENCE	ENTEROBACTERIA	NC_017770.1	SOLITALEA CANADENSIS DSM 3403, COMPLETE GENOME	SOLITALEA
-1.34886	EU871039.1	LACTOBACILLUS PHAGE LV-1, COMPLETE GENOME	LACTOBACILLUS	NC_008530.1	LACTOBACILLUS GASSERI ATCC 33323, COMPLETE GENOME	LACTOBACILLUS
-1.37586	EU876853.1	IODOBACTERIOPHAGE PHIPLPE, COMPLETE GENOME. [25-AUG-2017]	IODOBACTERIOPHAGE	NC_008228.1	PSEUDOALTEROMONAS ATLANTICA T6C, COMPLETE GENOME	PSEUDOALTEROMONAS
-1.33922	EU887664.1	BACILLUS PHAGE TP21-L, COMPLETE GENOME	BACILLUS	CP010577.1	BACILLUS THURINGIENSIS SEROVAR MORRISONI STRAIN BGSC 4AA1, COMPLETE GENOME	BACILLUS
-1.3747	FJ000341.1	SALMONELLA PHAGE G341C, COMPLETE GENOME. [25-AUG-2017]	SALMONELLA	NC_011205.1	SALMONELLA ENTERICA SUBSP. ENTERICA SEROVAR DUBLIN STR. CT_02021853, COMPLETE GENOME	SALMONELLA
-1.3655	FJ008913.1	BACTEROIDES PHAGE B40-8 CULTURE-COLLECTION ATCC:51477-B1, COMPLETE GENOME. [26-MAY-2017]	BACTEROIDES	NC_003228.3	BACTEROIDES FRAGILIS NCTC 9343, COMPLETE GENOME	BACTEROIDES
-1.26941	FJ168659.1	MYCOBACTERIUM PHAGE BRUJITA, COMPLETE GENOME. [25-AUG-2017]	MYCOBACTERIUM	NC_008596.1	MYCOBACTERIUM SMEGMATIS STR. MC2 155 CHROMOSOME, COMPLETE GENOME	MYCOBACTERIUM
-1.35293	FJ168661.1	MYCOBACTERIUM PHAGE GUMBALL, COMPLETE GENOME. [26-MAY-2017]	MYCOBACTERIUM	NC_018150.2	MYCOBACTERIUM ABSCESSUS SUBSP. MASSILIENSE STR. GO 06, COMPLETE GENOME	MYCOBACTERIUM
-1.35223	FJ168662.1	MYCOBACTERIUM PHAGE TROLL4, COMPLETE GENOME. [26-MAY-2017]	MYCOBACTERIUM	CP009616.1	MYCOBACTERIUM ABSCESSUS STRAIN 4529, COMPLETE GENOME	MYCOBACTERIUM
-1.33987	FJ174690.1	MYCOBACTERIUM PHAGE FRUITLOOP, COMPLETE GENOME. [25-AUG-2017]	MYCOBACTERIUM	AP014547.1	MYCOBACTERIUM ABSCESSUS SUBSP. BOLLETII CCUG 48898 = JCM 15300 DNA, COMPLETE GENOME	MYCOBACTERIUM
-1.35242	FJ174691.1	MYCOBACTERIUM PHAGE KONSTANTINE, COMPLETE GENOME. [26-MAY-2017]	MYCOBACTERIUM	NC_008009.1	CANDIDATUS KORIBACTER VERSATILIS ELLIN345, COMPLETE GENOME	CANDIDATUS
-1.34315	FJ174692.1	MYCOBACTERIUM PHAGE PACC40, COMPLETE GENOME. [26-MAY-2017]	MYCOBACTERIUM	AP014547.1	MYCOBACTERIUM ABSCESSUS SUBSP. BOLLETII CCUG 48898 = JCM 15300 DNA, COMPLETE GENOME	MYCOBACTERIUM
-1.34184	FJ174693.1	MYCOBACTERIUM PHAGE RAMSEY, COMPLETE GENOME. [26-MAY-2017]	MYCOBACTERIUM	NC_015564.1	HOYOSELLA SUBFLAVA DQS3-9A1, COMPLETE GENOME	HOYOSELLA
-1.28162	FJ174694.1	MYCOBACTERIUM PHAGE CHAH, COMPLETE GENOME. [26-MAY-2017]	MYCOBACTERIUM	NC_018289.1	MYCOBACTERIUM SMEGMATIS STR. MC2 155, COMPLETE GENOME	MYCOBACTERIUM
-1.32143	FJ188381.1	STX2-CONVERTING PHAGE 1717, COMPLETE GENOME. [25-AUG-2017]	ESCHERICHIA	NC_002695.1	ESCHERICHIA COLI O157:H7 STR. SAKAI, COMPLETE GENOME	ESCHERICHIA
-1.39454	FJ194439.1	KLUYVERA PHAGE KVP1, COMPLETE SEQUENCE	KLUYVERA	CP002122.1	PREVOTELLA MELANINOGENICA ATCC 25845 CHROMOSOME I, COMPLETE SEQUENCE	PREVOTELLA
-1.36717	FJ226752.1	STREPTOCOCCUS PHAGE ALQ13.2, COMPLETE GENOME. [25-AUG-2017]	STREPTOCOCCUS	NC_007432.1	STREPTOCOCCUS AGALACTIAE A909, COMPLETE GENOME	STREPTOCOCCUS
-1.37314	FJ230960.1	BACILLUS PHAGE SPO1, COMPLETE GENOME. [25-AUG-2017]	BACILLUS	NC_009633.1	ALKALIPHILUS METALLIREDIGENS QYMF, COMPLETE GENOME	ALKALIPHILUS
-1.3607	FJ236310.1	STREPTOCOCCUS PHAGE ABC2, COMPLETE GENOME. [26-MAY-2017]	STREPTOCOCCUS	NC_017595.1	STREPTOCOCCUS SALIVARIUS JIM8777 COMPLETE GENOME	STREPTOCOCCUS
-1.38496	FJ373894.1	SHIGELLA PHAGE PHISBOM-AG3, COMPLETE GENOME. [25-AUG-2017]	SHIGELLA	CP007142.1	GYNUELLA SUNSHINYII YC6258, COMPLETE GENOME	GYNUELLA
-1.37367	FJ409640.1	VIBRIOPHAGE N4, COMPLETE GENOME. [25-AUG-2017]	VIBRIO	CP002122.1	PREVOTELLA MELANINOGENICA ATCC 25845 CHROMOSOME I, COMPLETE SEQUENCE	PREVOTELLA
-1.33935	FJ429185.1	LACTOCOCCUS PHAGE P087, COMPLETE GENOME. [26-MAY-2017]	LACTOCOCCUS	AP014583.1	WINOGRADSKYELLA SP. PG-2 DNA, COMPLETE GENOME	WINOGRADSKYELLA
-1.37751	FJ591094.1	ROSEOPHAGE EE36P1, COMPLETE GENOME. [25-AUG-2017]	ROSEOPHAGE	NC_015152.1	SPHAEROCHAETA GLOBOSA STR. BUDDY, COMPLETE GENOME	SPHAEROCHAETA
-1.26946	FJ641182.1	MYCOBACTERIUM PHAGE PHLYER, COMPLETE GENOME. [26-MAY-2017]	MYCOBACTERIUM	CP007219.1	AMYCOLATOPSIS LURIDA NRRL 2430, COMPLETE GENOME	AMYCOLATOPSIS
-1.38747	FJ685651.1	HALORUBRUM PLEOMORPHIC VIRUS 1, COMPLETE GENOME	HALORUBRUM	NC_016512.1	PROPIONIBACTERIUM ACNES TYPEIA2 P.ACN17, COMPLETE GENOME	PROPIONIBACTERIUM
-1.3758	FJ706171.1	PROPIONIBACTERIUM PHAGE PAD20, COMPLETE GENOME. [26-MAY-2017]	PROPIONIBACTERIUM	NC_022198.1	CORYNEBACTERIUM ARGENTORATENSE DSM 44202, COMPLETE GENOME	CORYNEBACTERIUM
-1.37757	FJ706172.1	PROPIONIBACTERIUM PHAGE PAS50, COMPLETE GENOME. [26-MAY-2017]	PROPIONIBACTERIUM	NC_022198.1	CORYNEBACTERIUM ARGENTORATENSE DSM 44202, COMPLETE GENOME	CORYNEBACTERIUM
-1.37147	FJ750948.2	ENTEROBACTERIA PHAGE SSL-2009A, COMPLETE GENOME. [25-AUG-2017]	ENTEROBACTERIA	CP007557.1	CITROBACTER FREUNDII CFNIH1, COMPLETE GENOME	CITROBACTER
-1.34546	FJ792813.1	ENTEROCOCCUS PHAGE EFAP-1, COMPLETE GENOME. [25-AUG-2017]	ENTEROCOCCUS	CP007208.1	STAPHYLOCOCCUS XYLOSUS STRAIN HKUOPL8, COMPLETE GENOME	STAPHYLOCOCCUS
-1.35735	FJ822135.1	LACTOBACILLUS PHAGE LB338-1, COMPLETE GENOME. [25-AUG-2017]	LACTOBACILLUS	NC_015275.1	CLOSTRIDIUM LENTOCELLUM DSM 5427, COMPLETE GENOME	CLOSTRIDIUM
-1.34391	FJ839692.1	ENTEROBACTERIA PHAGE RB14, COMPLETE GENOME. [25-AUG-2017]	ENTEROBACTERIA	NC_014759.1	MARIVIRGA TRACTUOSA DSM 4126, COMPLETE GENOME	MARIVIRGA
-1.34338	FJ839693.1	ENTEROBACTERIA PHAGE RB51, COMPLETE GENOME. [25-AUG-2017]	ENTEROBACTERIA	NC_017331.1	STAPHYLOCOCCUS AUREUS SUBSP. AUREUS TW20, COMPLETE GENOME	STAPHYLOCOCCUS
-1.34675	FJ848881.1	LACTOCOCCUS PHAGE SL4, COMPLETE GENOME. [25-AUG-2017]	LACTOCOCCUS	CP006766.1	LACTOCOCCUS LACTIS SUBSP. LACTIS KLDS 4.0325, COMPLETE GENOME	LACTOCOCCUS
-1.34343	FJ848882.1	LACTOCOCCUS PHAGE CB13, COMPLETE GENOME. [25-AUG-2017]	LACTOCOCCUS	CP007208.1	STAPHYLOCOCCUS XYLOSUS STRAIN HKUOPL8, COMPLETE GENOME	STAPHYLOCOCCUS
-1.34261	FJ848883.1	LACTOCOCCUS PHAGE CB14, COMPLETE GENOME. [25-AUG-2017]	LACTOCOCCUS	CP007208.1	STAPHYLOCOCCUS XYLOSUS STRAIN HKUOPL8, COMPLETE GENOME	STAPHYLOCOCCUS
-1.34629	FJ848884.1	LACTOCOCCUS PHAGE CB19, COMPLETE GENOME. [25-AUG-2017]	LACTOCOCCUS	CP007208.1	STAPHYLOCOCCUS XYLOSUS STRAIN HKUOPL8, COMPLETE GENOME	STAPHYLOCOCCUS
-1.34512	FJ848885.1	LACTOCOCCUS PHAGE CB20, COMPLETE GENOME. [25-AUG-2017]	LACTOCOCCUS	CP007208.1	STAPHYLOCOCCUS XYLOSUS STRAIN HKUOPL8, COMPLETE GENOME	STAPHYLOCOCCUS
-1.36563	FJ870915.1	SULFOLOBUS SPINDLE-SHAPED VIRUS 6, COMPLETE GENOME	SULFOLOBUS	NC_007181.1	SULFOLOBUS ACIDOCALDARIUS DSM 639, COMPLETE GENOME	SULFOLOBUS
-1.36632	FJ870916.1	SULFOLOBUS SPINDLE-SHAPED VIRUS 7, COMPLETE GENOME	SULFOLOBUS	NC_012726.1	SULFOLOBUS ISLANDICUS M.16.4, COMPLETE GENOME	SULFOLOBUS
-1.36172	FJ870917.1	ACIDIANUS SPINDLE-SHAPED VIRUS 1, COMPLETE GENOME	ACIDIANUS	NC_003106.2	SULFOLOBUS TOKODAII STR. 7 DNA, COMPLETE GENOME	SULFOLOBUS
-1.39189	FJ896200.1	VIBRIO PHAGE VP93, COMPLETE GENOME. [26-MAY-2017]	VIBRIO	CP001805.1	VIBRIO ANTIQUARIUS STRAIN EX25 CHROMOSOME 1, COMPLETE SEQUENCE	VIBRIO
-1.36769	FJ904927.1	VIBRIO PHAGE VEJPHI, COMPLETE GENOME. [27-MAY-2016]	VIBRIO	NC_009654.1	MARINOMONAS SP. MWYL1, COMPLETE GENOME	MARINOMONAS
-1.27031	FJ937737.2	BURKHOLDERIA CENOCEPACIA PHAGE BCEPIL02, COMPLETE GENOME. [26-MAY-2017]	BURKHOLDERIA	CP000440.1	BURKHOLDERIA AMBIFARIA AMMD CHROMOSOME 1, COMPLETE SEQUENCE	BURKHOLDERIA
-1.36357	FJ965538.1	STREPTOCOCCUS PHAGE 5093, COMPLETE GENOME. [25-AUG-2017]	STREPTOCOCCUS	CP009278.1	SPHINGOBACTERIUM SP. ML3W, COMPLETE GENOME	SPHINGOBACTERIUM
-1.27969	FJ973624.1	MYCOBACTERIUM PHAGE ANGEL, COMPLETE GENOME. [25-AUG-2017]	MYCOBACTERIUM	NC_016604.1	MYCOBACTERIUM RHODESIAE NBB3, COMPLETE GENOME	MYCOBACTERIUM
-1.33638	FJ982340.1	BURKHOLDERIA PHAGE KS9, COMPLETE GENOME. [26-MAY-2017]	BURKHOLDERIA	CP000270.1	PARABURKHOLDERIA XENOVORANS LB400 CHROMOSOME 1, COMPLETE SEQUENCE	PARABURKHOLDERIA
-1.36833	FM163528.1	STREPTOCOCCUS PHAGE PH15, COMPLETE GENOME [25-AUG-2017]	STREPTOCOCCUS	NC_004606.1	STREPTOCOCCUS PYOGENES SSI-1 DNA, COMPLETE GENOME	STREPTOCOCCUS
-1.30141	FM164764.1	STYGIOLOBUS ROD-SHAPED VIRUS, COMPLETE GENOME	STYGIOLOBUS	CP006777.1	CLOSTRIDIUM BEIJERINCKII ATCC 35702, COMPLETE GENOME	CLOSTRIDIUM
-1.32483	FM180578.1	ENTEROBACTERIA PHAGE 2851, COMPLETE GENOME [25-AUG-2017]	ENTEROBACTERIA	NC_013364.1	ESCHERICHIA COLI O111:H- STR. 11128 DNA, COMPLETE GENOME	ESCHERICHIA
-1.36318	FM201281.1	PSEUDOMONAS PHAGE LBL3 COMPLETE GENOME [25-AUG-2017]	PSEUDOMONAS	NC_008009.1	CANDIDATUS KORIBACTER VERSATILIS ELLIN345, COMPLETE GENOME	CANDIDATUS
-1.36136	FM201282.1	PSEUDOMONAS PHAGE LMA2 COMPLETE GENOME [25-AUG-2017]	PSEUDOMONAS	NC_008009.1	CANDIDATUS KORIBACTER VERSATILIS ELLIN345, COMPLETE GENOME	CANDIDATUS
-1.37332	FM207411.1	SYNECHOCOCCUS PHAGE S-RSM4 COMPLETE GENOME [25-AUG-2017]	SYNECHOCOCCUS	CP010976.1	PAENIBACILLUS SP. IHBB 10380, COMPLETE GENOME	PAENIBACILLUS
-1.36115	FM887021.1	PSEUDOMONAS PHAGE SN, COMPLETE GENOME [25-AUG-2017]	PSEUDOMONAS	NC_008009.1	CANDIDATUS KORIBACTER VERSATILIS ELLIN345, COMPLETE GENOME	CANDIDATUS
-1.36182	FM897211.1	PSEUDOMONAS PHAGE 14-1, COMPLETE GENOME [25-AUG-2017]	PSEUDOMONAS	NC_008009.1	CANDIDATUS KORIBACTER VERSATILIS ELLIN345, COMPLETE GENOME	CANDIDATUS
-1.3337	FN263372.1	PSEUDOMONAS PHAGE PHIKF77, COMPLETE GENOME [26-MAY-2017]	PSEUDOMONAS	NC_022738.1	PSEUDOMONAS SP. VLB120, COMPLETE GENOME	PSEUDOMONAS
-1.37888	FN297812.1	VIBRIO PHAGE VP58.5, COMPLETE GENOME [25-AUG-2017]	VIBRIO	NC_018268.1	MARINOBACTER SP. BSS20148, COMPLETE GENOME	MARINOBACTER
-1.34842	FN391954.1	STREPTOCOCCUS PHAGE PH10, COMPLETE GENOME [25-AUG-2017]	STREPTOCOCCUS	NC_012467.1	STREPTOCOCCUS PNEUMONIAE P1031, COMPLETE GENOME	STREPTOCOCCUS
-1.37852	FN422398.1	PSEUDOMONAS PHAGE LUZ7 COMPLETE GENOME [26-MAY-2017]	PSEUDOMONAS	NC_017506.1	MARINOBACTER ADHAERENS HP15, COMPLETE GENOME	MARINOBACTER
-1.36839	FN422399.1	PSEUDOMONAS PHAGE LIT1 COMPLETE GENOME [26-MAY-2017]	PSEUDOMONAS	NC_018531.1	ARTHROBACTER SP. RUE61A, COMPLETE GENOME	ARTHROBACTER
-1.3582	FN594518.1	PSEUDOMONAS PHAGE PHI-2, COMPLETE GENOME, ISOLATED FROM PSEUDOMONAS FLUORESCENS SBW25 [26-MAY-2017]	PSEUDOMONAS	CP009974.1	PSEUDOMONAS PUTIDA S12, COMPLETE GENOME	PSEUDOMONAS
-1.28529	FN667788.1	CAMPYLOBACTER PHAGE CP220, COMPLETE GENOME [25-AUG-2017]	CAMPYLOBACTER	NC_020291.1	CLOSTRIDIUM SACCHAROPERBUTYLACETONICUM N1-4(HMT), COMPLETE GENOME	CLOSTRIDIUM
-1.28473	FN667789.1	CAMPYLOBACTER PHAGE CPT10, COMPLETE GENOME [25-AUG-2017]	CAMPYLOBACTER	NC_020291.1	CLOSTRIDIUM SACCHAROPERBUTYLACETONICUM N1-4(HMT), COMPLETE GENOME	CLOSTRIDIUM
-1.38321	FQ312032.1	SALMONELLA PHAGE VI01 COMPLETE SEQUENCE [25-AUG-2017]	SALMONELLA	NC_023037.2	PAENIBACILLUS POLYMYXA CR1, COMPLETE GENOME	PAENIBACILLUS
-1.37898	FQ482083.1	ERWINIA AMYLOVORA PHAGE PHIEA104 COMPLETE GENOME. [25-AUG-2017]	ERWINIA	NC_017595.1	STREPTOCOCCUS SALIVARIUS JIM8777 COMPLETE GENOME	STREPTOCOCCUS
-1.38122	FQ482085.1	ERWINIA TASMANIENSIS PHAGE PHIET88 COMPLETE GENOME. [25-AUG-2017]	ERWINIA	CP004083.1	ENTEROBACTERIACEAE BACTERIUM BTA3-1, COMPLETE GENOME	ENTEROBACTERIACEAE
-1.39192	FQ482086.1	ERWINIA AMYLOVORA PHAGE PHIEA100 COMPLETE GENOME. [26-MAY-2017]	ERWINIA	CP009621.1	PONTIBACTER KORLENSIS STRAIN X14-1T, COMPLETE GENOME	PONTIBACTER
-1.40278	FR667955.1	SALMONELLA PHAGE VI06 COMPLETE SEQUENCE [25-AUG-2017]	SALMONELLA	NC_013203.1	ATOPOBIUM PARVULUM DSM 20469, COMPLETE GENOME	ATOPOBIUM
-1.38202	FR687252.1	PANTOEA PHAGE LIMELIGHT COMPLETE GENOME [26-MAY-2017]	PANTOEA	CP006929.1	DICKEYA ZEAE EC1, COMPLETE GENOME	DICKEYA
-1.37666	FR751545.1	PANTOEA PHAGE LIMEZERO COMPLETE GENOME [26-MAY-2017]	PANTOEA	CP007152.1	MARINOBACTER SALARIUS STRAIN R9SW1, COMPLETE GENOME	MARINOBACTER
-1.35655	FR775895.2	ENTEROBACTERIA PHAGE PHI92, COMPLETE GENOME [25-AUG-2017]	ENTEROBACTERIA	NC_010001.1	LACHNOCLOSTRIDIUM PHYTOFERMENTANS ISDG, COMPLETE GENOME	LACHNOCLOSTRIDIUM
-1.36532	FR823298.1	PSEUDOMONAS PHAGE PHI15 COMPLETE GENOME [26-MAY-2017]	PSEUDOMONAS	NC_018531.1	ARTHROBACTER SP. RUE61A, COMPLETE GENOME	ARTHROBACTER
-1.26003	FR823450.1	CAMPYLOBACTER PHAGE CP81, COMPLETE GENOME [25-AUG-2017]	CAMPYLOBACTER	NC_020291.1	CLOSTRIDIUM SACCHAROPERBUTYLACETONICUM N1-4(HMT), COMPLETE GENOME	CLOSTRIDIUM
-1.30161	FR852584.1	STAPHYLOCOCCUS PHAGE ISP COMPLETE GENOME [25-AUG-2017]	STAPHYLOCOCCUS	FN665652.1	CLOSTRIDIUM DIFFICILE COMPLETE GENOME, STRAIN CF5	CLOSTRIDIUM
-1.37666	GQ149088.1	ENTEROBACTERIA PHAGE ST-1, COMPLETE GENOME. [26-MAY-2017]	ENTEROBACTERIA	CP009281.1	PAENIBACILLUS SP. FSL R5-0345, COMPLETE GENOME	PAENIBACILLUS
-1.37804	GQ241246.1	CLAVIBACTER PHAGE CMP1, COMPLETE GENOME. [26-MAY-2017]	CLAVIBACTER	NC_008009.1	CANDIDATUS KORIBACTER VERSATILIS ELLIN345, COMPLETE GENOME	CANDIDATUS
-1.28224	GQ303259.1	MYCOBACTERIUM PHAGE COLBERT, COMPLETE GENOME. [26-MAY-2017]	MYCOBACTERIUM	NC_018289.1	MYCOBACTERIUM SMEGMATIS STR. MC2 155, COMPLETE GENOME	MYCOBACTERIUM
-1.29835	GQ303260.1	MYCOBACTERIUM PHAGE ET08, COMPLETE GENOME. [25-AUG-2017]	MYCOBACTERIUM	CP009914.1	MYCOBACTERIUM SP. VKM AC-1817D, COMPLETE GENOME	MYCOBACTERIUM
-1.28075	GQ303261.1	MYCOBACTERIUM PHAGE HOPE, COMPLETE GENOME. [25-AUG-2017]	MYCOBACTERIUM	NC_019966.1	MYCOBACTERIUM SP. JS623, COMPLETE GENOME	MYCOBACTERIUM
-1.29781	GQ303262.1	MYCOBACTERIUM PHAGE LRRHOOD, COMPLETE GENOME. [25-AUG-2017]	MYCOBACTERIUM	CP009914.1	MYCOBACTERIUM SP. VKM AC-1817D, COMPLETE GENOME	MYCOBACTERIUM
-1.32146	GQ303263.1	MYCOBACTERIUM PHAGE PEACHES, COMPLETE GENOME. [25-AUG-2017]	MYCOBACTERIUM	NC_012490.1	RHODOCOCCUS ERYTHROPOLIS PR4 DNA, COMPLETE GENOME	RHODOCOCCUS
-1.28186	GQ303266.1	MYCOBACTERIUM PHAGE UNCLEHOWIE, COMPLETE GENOME. [26-MAY-2017]	MYCOBACTERIUM	NC_018289.1	MYCOBACTERIUM SMEGMATIS STR. MC2 155, COMPLETE GENOME	MYCOBACTERIUM
-1.38154	GQ334450.1	CYANOPHAGE PSS2, COMPLETE GENOME. [25-AUG-2017]	CYANOPHAGE	CP000554.1	PROCHLOROCOCCUS MARINUS STR. MIT 9303, COMPLETE GENOME	PROCHLOROCOCCUS
-1.36379	GQ357915.1	DEFTIA PHAGE PHIW-14, COMPLETE GENOME. [25-AUG-2017]	DEFTIA	CP007152.1	MARINOBACTER SALARIUS STRAIN R9SW1, COMPLETE GENOME	MARINOBACTER
-1.32656	GQ357916.1	ESCHERICHIA PHAGE D108, COMPLETE GENOME. [25-AUG-2017]	ESCHERICHIA	NC_016902.1	ESCHERICHIA COLI KO11, COMPLETE GENOME	ESCHERICHIA
-1.32174	GQ379227.1	STREPTOMYCES PHAGE PHISASD1, COMPLETE GENOME. [26-MAY-2017]	STREPTOMYCES	NC_008541.1	ARTHROBACTER SP. FB24, COMPLETE GENOME	ARTHROBACTER
-1.31393	GQ398772.1	STAPHYLOCOCCUS PHAGE P954, COMPLETE GENOME. [25-AUG-2017]	STAPHYLOCOCCUS	NC_017337.1	STAPHYLOCOCCUS AUREUS SUBSP. AUREUS ED133, COMPLETE GENOME	STAPHYLOCOCCUS
-1.37835	GQ403788.1	LACTOCOCCUS PHAGE 1358, COMPLETE SEQUENCE	LACTOCOCCUS	NC_018020.1	TURNERIELLA PARVA DSM 21527, COMPLETE GENOME	TURNERIELLA
-1.28028	GQ403789.1	THERMUS PHAGE P23-77, COMPLETE GENOME. [26-MAY-2017]	THERMUS	NC_017278.1	THERMUS SP. CCB_US3_UF1, COMPLETE GENOME	THERMUS
-1.39699	GQ413937.1	KLEBSIELLA PHAGE KP32, COMPLETE GENOME. [25-AUG-2017]	KLEBSIELLA	NC_014033.1	PREVOTELLA RUMINICOLA 23, COMPLETE GENOME	PREVOTELLA
-1.39864	GQ413938.2	KLEBSIELLA PHAGE KP34, COMPLETE GENOME. [26-MAY-2017]	KLEBSIELLA	CP009621.1	PONTIBACTER KORLENSIS STRAIN X14-1T, COMPLETE GENOME	PONTIBACTER
-1.35992	GQ422450.1	ENTEROBACTERIA PHAGE UAB_PHI20, COMPLETE GENOME	ENTEROBACTERIA	NC_011083.1	SALMONELLA ENTERICA SUBSP. ENTERICA SEROVAR HEIDELBERG STR. SL476, COMPLETE GENOME	SALMONELLA
-1.3599	GQ422451.1	ENTEROBACTERIA PHAGE PHI75, PARTIAL GENOME	ENTEROBACTERIA	NC_011083.1	SALMONELLA ENTERICA SUBSP. ENTERICA SEROVAR HEIDELBERG STR. SL476, COMPLETE GENOME	SALMONELLA
-1.29686	GQ443085.1	CLOSTRIDIUM PHAGE CP26F, COMPLETE GENOME. [26-MAY-2017]	CLOSTRIDIUM	NC_020291.1	CLOSTRIDIUM SACCHAROPERBUTYLACETONICUM N1-4(HMT), COMPLETE GENOME	CLOSTRIDIUM
-1.35776	GQ451696.1	LEUCONOSTOC PHAGE 1-A4, COMPLETE GENOME. [25-AUG-2017]	LEUCONOSTOC	CP007208.1	STAPHYLOCOCCUS XYLOSUS STRAIN HKUOPL8, COMPLETE GENOME	STAPHYLOCOCCUS
-1.32912	GQ452243.1	ENTEROCOCCUS PHAGE PHIEF11, COMPLETE GENOME. [25-AUG-2017]	ENTEROCOCCUS	CP004081.1	ENTEROCOCCUS FAECALIS DENG1, COMPLETE GENOME	ENTEROCOCCUS
-1.32702	GQ466608.1	VIBRIO PHAGE CTX STRAIN IB1346 RSTR (RSTR), RSTA (RSTA), RSTB (RSTB), CEP (CEP), HYPOTHETICAL PROTEIN, ACE (ACE), ZOT (ZOT), CTXA (CTXA), CTXB (CTXB), RSTR (RSTR), RSTA (RSTA), RSTB (RSTB), RSTC (RSTC), RSTR (RSTR), RSTA	VIBRIO	CP000626.1	VIBRIO CHOLERAE O395 CHROMOSOME 1, COMPLETE GENOME	VIBRIO
-1.31736	GQ466609.1	VIBRIO PHAGE CTX STRAIN IB1346 RSTR (RSTR), RSTA (RSTA), RSTB (RSTB), CEP (CEP), HYPOTHETICAL PROTEIN, ACE (ACE), ZOT (ZOT), CTXA (CTXA), CTXB (CTXB), RSTR (RSTR), RSTA (RSTA), RSTB (RSTB), CEP (CEP), HYPOTHETICAL PROTEIN, ACE	VIBRIO	CP000626.1	VIBRIO CHOLERAE O395 CHROMOSOME 1, COMPLETE GENOME	VIBRIO
-1.32103	GQ466610.1	VIBRIO PHAGE CTX STRAIN IB1627 RSTR (RSTR), RSTA (RSTA), RSTB (RSTB), CEP (CEP), HYPOTHETICAL PROTEIN, ACE (ACE), ZOT (ZOT), CTXA (CTXA), CTXB (CTXB), RSTR (RSTR), RSTA (RSTA), RSTB (RSTB), AND RSTC (RSTC) GENES, COMPLETE	VIBRIO	CP000626.1	VIBRIO CHOLERAE O395 CHROMOSOME 1, COMPLETE GENOME	VIBRIO
-1.31694	GQ466612.1	VIBRIO PHAGE CTX STRAIN IB1482 RSTR (RSTR), RSTA (RSTA), RSTB (RSTB), CEP (CEP), HYPOTHETICAL PROTEIN, ACE (ACE), ZOT (ZOT), CTXA (CTXA), CTXB (CTXB), RSTR (RSTR), RSTA (RSTA), RSTB (RSTB), CEP (CEP), HYPOTHETICAL PROTEIN, ACE	VIBRIO	CP000626.1	VIBRIO CHOLERAE O395 CHROMOSOME 1, COMPLETE GENOME	VIBRIO
-1.39405	GQ468526.1	ENTEROBACTERIA PHAGE 285P, COMPLETE GENOME. [25-AUG-2017]	ENTEROBACTERIA	CP002122.1	PREVOTELLA MELANINOGENICA ATCC 25845 CHROMOSOME I, COMPLETE SEQUENCE	PREVOTELLA
-1.32992	GQ478081.1	ENTEROCOCCUS PHAGE PHIFL1A, COMPLETE GENOME. [25-AUG-2017]	ENTEROCOCCUS	NC_015391.1	CARNOBACTERIUM SP. 17-4, COMPLETE GENOME	CARNOBACTERIUM
-1.32988	GQ478082.1	ENTEROCOCCUS PHAGE PHIFL1B, COMPLETE GENOME. [25-AUG-2017]	ENTEROCOCCUS	NC_015391.1	CARNOBACTERIUM SP. 17-4, COMPLETE GENOME	CARNOBACTERIUM
-1.33019	GQ478083.1	ENTEROCOCCUS PHAGE PHIFL1C, COMPLETE GENOME. [25-AUG-2017]	ENTEROCOCCUS	NC_015391.1	CARNOBACTERIUM SP. 17-4, COMPLETE GENOME	CARNOBACTERIUM
-1.33188	GQ478084.1	ENTEROCOCCUS PHAGE PHIFL2A, COMPLETE GENOME. [25-AUG-2017]	ENTEROCOCCUS	CP004081.1	ENTEROCOCCUS FAECALIS DENG1, COMPLETE GENOME	ENTEROCOCCUS
-1.33168	GQ478085.1	ENTEROCOCCUS PHAGE PHIFL2B, COMPLETE GENOME. [25-AUG-2017]	ENTEROCOCCUS	CP004081.1	ENTEROCOCCUS FAECALIS DENG1, COMPLETE GENOME	ENTEROCOCCUS
-1.33279	GQ478086.1	ENTEROCOCCUS PHAGE PHIFL3A, COMPLETE GENOME. [25-AUG-2017]	ENTEROCOCCUS	CP004081.1	ENTEROCOCCUS FAECALIS DENG1, COMPLETE GENOME	ENTEROCOCCUS
-1.33279	GQ478087.1	ENTEROCOCCUS PHAGE PHIFL3B, COMPLETE GENOME. [25-AUG-2017]	ENTEROCOCCUS	CP004081.1	ENTEROCOCCUS FAECALIS DENG1, COMPLETE GENOME	ENTEROCOCCUS
-1.31081	GQ478088.1	ENTEROCOCCUS PHAGE PHIFL4A, COMPLETE GENOME. [26-MAY-2017]	ENTEROCOCCUS	CP004081.1	ENTEROCOCCUS FAECALIS DENG1, COMPLETE GENOME	ENTEROCOCCUS
-1.31664	GQ485644.1	VIBRIO PHAGE CTX STRAIN B33 RSTR (RSTR), RSTA (RSTA), RSTB (RSTB), CEP (CEP), HYPOTHETICAL PROTEIN, ACE (ACE), ZOT (ZOT), CTXA (CTXA), CTXB (CTXB), RSTR (RSTR), RSTA (RSTA), RSTB (RSTB), CEP (CEP), HYPOTHETICAL PROTEIN, ACE	VIBRIO	CP000626.1	VIBRIO CHOLERAE O395 CHROMOSOME 1, COMPLETE GENOME	VIBRIO
-1.31644	GQ485645.1	VIBRIO PHAGE CTX STRAIN MJ1236 RSTR (RSTR), RSTA (RSTA), RSTB (RSTB), CEP (CEP), HYPOTHETICAL PROTEIN, ACE (ACE), ZOT (ZOT), CTXA (CTXA), CTXB (CTXB), RSTR (RSTR), RSTA (RSTA), RSTB (RSTB), CEP (CEP), HYPOTHETICAL PROTEIN, ACE	VIBRIO	CP000626.1	VIBRIO CHOLERAE O395 CHROMOSOME 1, COMPLETE GENOME	VIBRIO
-1.31716	GQ485646.1	VIBRIO PHAGE CTX STRAIN MG116926 RSTR (RSTR), RSTA (RSTA), RSTB (RSTB), CEP (CEP), HYPOTHETICAL PROTEIN, ACE (ACE), ZOT (ZOT), CTXA (CTXA), CTXB (CTXB), RSTR (RSTR), RSTA (RSTA), RSTB (RSTB), CEP (CEP), HYPOTHETICAL PROTEIN, ACE	VIBRIO	CP000626.1	VIBRIO CHOLERAE O395 CHROMOSOME 1, COMPLETE GENOME	VIBRIO
-1.31736	GQ485649.1	VIBRIO PHAGE CTX STRAIN E1781 RSTR (RSTR), RSTA (RSTA), RSTB (RSTB), CEP (CEP), HYPOTHETICAL PROTEIN, ACE (ACE), ZOT (ZOT), CTXA (CTXA), CTXB (CTXB), RSTR (RSTR), RSTA (RSTA), RSTB (RSTB), CEP (CEP), HYPOTHETICAL PROTEIN, ACE	VIBRIO	CP000626.1	VIBRIO CHOLERAE O395 CHROMOSOME 1, COMPLETE GENOME	VIBRIO
-1.33437	GQ485650.1	VIBRIO PHAGE CTX STRAIN IB4322 RSTR (RSTR), RSTA (RSTA), RSTB (RSTB), RSTC (RSTC), RSTR (RSTR), RSTA (RSTA), RSTB (RSTB), CEP (CEP), HYPOTHETICAL PROTEIN, ACE (ACE), CTXA (CTXA), AND CTXB (CTXB) GENES, COMPLETE CDS	VIBRIO	CP000626.1	VIBRIO CHOLERAE O395 CHROMOSOME 1, COMPLETE GENOME	VIBRIO
-1.33413	GQ485651.1	VIBRIO PHAGE CTX STRAIN IB4642 RSTR (RSTR), RSTA (RSTA), RSTB (RSTB), RSTC (RSTC), RSTR (RSTR), RSTA (RSTA), RSTB (RSTB), CEP (CEP), HYPOTHETICAL PROTEIN, ACE (ACE), ZOT (ZOT), CTXA (CTXA), AND CTXB (CTXB) GENES, COMPLETE	VIBRIO	CP000626.1	VIBRIO CHOLERAE O395 CHROMOSOME 1, COMPLETE GENOME	VIBRIO
-1.33447	GQ485652.1	VIBRIO PHAGE CTX STRAIN 01.07VP RSTR (RSTR), RSTA (RSTA), RSTB (RSTB), RSTC (RSTC), RSTR (RSTR), RSTA (RSTA), RSTB (RSTB), CEP (CEP), HYPOTHETICAL PROTEIN, ACE (ACE), ZOT (ZOT), CTXA (CTXA), AND CTXB (CTXB) GENES, COMPLETE	VIBRIO	CP000626.1	VIBRIO CHOLERAE O395 CHROMOSOME 1, COMPLETE GENOME	VIBRIO
-1.37271	GQ502199.1	SODALIS PHAGE SO-1, COMPLETE GENOME. [25-AUG-2017]	SODALIS	CP011018.1	ESCHERICHIA COLI STRAIN CI5, COMPLETE GENOME	ESCHERICHIA
-1.36164	GQ866233.1	AGGREGATIBACTER PHAGE S1249, COMPLETE SEQUENCE	AGGREGATIBACTER	NC_012913.1	AGGREGATIBACTER APHROPHILUS NJ8700, COMPLETE GENOME	AGGREGATIBACTER
-1.36968	GQ981382.1	SHIGELLA PHAGE SP18, COMPLETE GENOME. [25-AUG-2017]	SHIGELLA	NC_017770.1	SOLITALEA CANADENSIS DSM 3403, COMPLETE GENOME	SOLITALEA
-1.34053	GU060500.1	MYCOBACTERIUM PHAGE ARDMORE, COMPLETE GENOME. [26-MAY-2017]	MYCOBACTERIUM	AP014547.1	MYCOBACTERIUM ABSCESSUS SUBSP. BOLLETII CCUG 48898 = JCM 15300 DNA, COMPLETE GENOME	MYCOBACTERIUM
-1.3821	GU070616.1	SALMONELLA PHAGE PVP-SE1, COMPLETE GENOME. [25-AUG-2017]	SALMONELLA	NC_020304.1	DESULFOCAPSA SULFEXIGENS DSM 10523, COMPLETE GENOME	DESULFOCAPSA
-1.38182	GU071090.1	CYANOPHAGE PSS2, PARTIAL GENOME	CYANOPHAGE	CP000554.1	PROCHLOROCOCCUS MARINUS STR. MIT 9303, COMPLETE GENOME	PROCHLOROCOCCUS
-1.40011	GU071091.1	ENTEROBACTERIA PHAGE T7, COMPLETE GENOME. [25-AUG-2017]	ENTEROBACTERIA	CP002122.1	PREVOTELLA MELANINOGENICA ATCC 25845 CHROMOSOME I, COMPLETE SEQUENCE	PREVOTELLA
-1.33587	GU071092.1	PROCHLOROCOCCUS PHAGE P-SSM2, COMPLETE GENOME. [25-AUG-2017]	PROCHLOROCOCCUS	NC_020291.1	CLOSTRIDIUM SACCHAROPERBUTYLACETONICUM N1-4(HMT), COMPLETE GENOME	CLOSTRIDIUM
-1.37613	GU071094.1	SYNECHOCOCCUS PHAGE S-SM1, COMPLETE GENOME. [25-AUG-2017]	SYNECHOCOCCUS	CP009278.1	SPHINGOBACTERIUM SP. ML3W, COMPLETE GENOME	SPHINGOBACTERIUM
-1.36979	GU071095.1	SYNECHOCOCCUS PHAGE S-SM2, COMPLETE GENOME. [25-AUG-2017]	SYNECHOCOCCUS	NC_010001.1	LACHNOCLOSTRIDIUM PHYTOFERMENTANS ISDG, COMPLETE GENOME	LACHNOCLOSTRIDIUM
-1.37744	GU071096.1	SYNECHOCOCCUS PHAGE S-SHM2, COMPLETE GENOME. [25-AUG-2017]	SYNECHOCOCCUS	CP009278.1	SPHINGOBACTERIUM SP. ML3W, COMPLETE GENOME	SPHINGOBACTERIUM
-1.3699	GU071097.1	SYNECHOCOCCUS PHAGE S-SSM5, COMPLETE GENOME. [25-AUG-2017]	SYNECHOCOCCUS	NC_010001.1	LACHNOCLOSTRIDIUM PHYTOFERMENTANS ISDG, COMPLETE GENOME	LACHNOCLOSTRIDIUM
-1.36722	GU071098.1	SYNECHOCOCCUS PHAGE S-SSM7, COMPLETE GENOME. [25-AUG-2017]	SYNECHOCOCCUS	NC_010001.1	LACHNOCLOSTRIDIUM PHYTOFERMENTANS ISDG, COMPLETE GENOME	LACHNOCLOSTRIDIUM
-1.35486	GU071099.1	PROCHLOROCOCCUS PHAGE P-RSM4, COMPLETE GENOME. [25-AUG-2017]	PROCHLOROCOCCUS	NC_010001.1	LACHNOCLOSTRIDIUM PHYTOFERMENTANS ISDG, COMPLETE GENOME	LACHNOCLOSTRIDIUM
-1.36376	GU071100.1	CYANOPHAGE 9515-10A, COMPLETE GENOME. [26-MAY-2017]	CYANOPHAGE	CP010327.1	MYROIDES SP. A21, COMPLETE GENOME	MYROIDES
-1.35907	GU071101.1	PROCHLOROCOCCUS PHAGE P-HM1, COMPLETE GENOME. [25-AUG-2017]	PROCHLOROCOCCUS	NC_010001.1	LACHNOCLOSTRIDIUM PHYTOFERMENTANS ISDG, COMPLETE GENOME	LACHNOCLOSTRIDIUM
-1.3599	GU071102.1	CYANOPHAGE NATL1A-7, COMPLETE GENOME. [26-MAY-2017]	CYANOPHAGE	CP010327.1	MYROIDES SP. A21, COMPLETE GENOME	MYROIDES
-1.35146	GU071103.1	PROCHLOROCOCCUS PHAGE P-SSM7, COMPLETE GENOME. [25-AUG-2017]	PROCHLOROCOCCUS	NC_010001.1	LACHNOCLOSTRIDIUM PHYTOFERMENTANS ISDG, COMPLETE GENOME	LACHNOCLOSTRIDIUM
-1.37357	GU071105.1	PROCHLOROCOCCUS PHAGE SYN1, COMPLETE GENOME. [25-AUG-2017]	PROCHLOROCOCCUS	CP010976.1	PAENIBACILLUS SP. IHBB 10380, COMPLETE GENOME	PAENIBACILLUS
-1.37623	GU071106.1	SYNECHOCOCCUS PHAGE SYN19, COMPLETE GENOME. [25-AUG-2017]	SYNECHOCOCCUS	CP010976.1	PAENIBACILLUS SP. IHBB 10380, COMPLETE GENOME	PAENIBACILLUS
-1.35829	GU071107.1	CYANOPHAGE P-SSP2, COMPLETE GENOME. [26-MAY-2017]	CYANOPHAGE	NC_010001.1	LACHNOCLOSTRIDIUM PHYTOFERMENTANS ISDG, COMPLETE GENOME	LACHNOCLOSTRIDIUM
-1.35981	GU075905.1	PROCHLOROCOCCUS PHAGE P-HM2, COMPLETE GENOME. [25-AUG-2017]	PROCHLOROCOCCUS	NC_010001.1	LACHNOCLOSTRIDIUM PHYTOFERMENTANS ISDG, COMPLETE GENOME	LACHNOCLOSTRIDIUM
-1.34965	GU080336.1	SULFOLOBUS TURRETED ICOSAHEDRAL VIRUS 2, COMPLETE GENOME	SULFOLOBUS	NC_010001.1	LACHNOCLOSTRIDIUM PHYTOFERMENTANS ISDG, COMPLETE GENOME	LACHNOCLOSTRIDIUM
-1.38893	GU169904.1	STAPHYLOCOCCUS PHAGE SA1, COMPLETE GENOME. [25-AUG-2017]	STAPHYLOCOCCUS	CP003241.1	VIBRIO SP. EJY3 CHROMOSOME 1, COMPLETE SEQUENCE	VIBRIO
-1.38114	GU196277.1	ESCHERICHIA PHAGE K1G, COMPLETE GENOME. [25-AUG-2017]	ESCHERICHIA	NC_017641.1	ESCHERICHIA COLI UMNK88, COMPLETE GENOME	ESCHERICHIA
-1.38025	GU196278.1	ESCHERICHIA PHAGE K1H, COMPLETE GENOME. [25-AUG-2017]	ESCHERICHIA	NC_017631.1	ESCHERICHIA COLI ABU 83972, COMPLETE GENOME	ESCHERICHIA
-1.34622	GU229986.1	BACILLUS PHAGE 250, COMPLETE GENOME. [25-AUG-2017]	BACILLUS	NC_018500.1	BACILLUS THURINGIENSIS HD-771, COMPLETE GENOME	BACILLUS
-1.32378	GU247132.1	MYCOBACTERIUM PHAGE SKIPOLE, COMPLETE GENOME. [25-AUG-2017]	MYCOBACTERIUM	NC_016604.1	MYCOBACTERIUM RHODESIAE NBB3, COMPLETE GENOME	MYCOBACTERIUM
-1.28231	GU247133.1	MYCOBACTERIUM PHAGE FANG, COMPLETE GENOME. [26-MAY-2017]	MYCOBACTERIUM	NC_018289.1	MYCOBACTERIUM SMEGMATIS STR. MC2 155, COMPLETE GENOME	MYCOBACTERIUM
-1.28124	GU247134.1	MYCOBACTERIUM PHAGE SCOOT17C, COMPLETE GENOME. [26-MAY-2017]	MYCOBACTERIUM	NC_018289.1	MYCOBACTERIUM SMEGMATIS STR. MC2 155, COMPLETE GENOME	MYCOBACTERIUM
-1.37569	GU295964.1	KLEBSIELLA PHAGE KP15, COMPLETE GENOME. [25-AUG-2017]	KLEBSIELLA	NC_015277.1	SPHINGOBACTERIUM SP. 21, COMPLETE GENOME	SPHINGOBACTERIUM
-1.26307	GU296433.1	CAMPYLOBACTER PHAGE NCTC12673, COMPLETE GENOME. [25-AUG-2017]	CAMPYLOBACTER	CP009933.1	CLOSTRIDIUM SCATOLOGENES STRAIN ATCC 25775, COMPLETE GENOME	CLOSTRIDIUM
-1.37069	GU321093.1	HALOARCULA HISPANICA PLEOMORPHIC VIRUS 1, COMPLETE GENOME	HALOARCULA	NC_015564.1	HOYOSELLA SUBFLAVA DQS3-9A1, COMPLETE GENOME	HOYOSELLA
-1.36819	GU323318.1	ENTEROBACTERIA PHAGE CC31, COMPLETE GENOME. [25-AUG-2017]	ENTEROBACTERIA	CP009281.1	PAENIBACILLUS SP. FSL R5-0345, COMPLETE GENOME	PAENIBACILLUS
-1.38239	GU323708.1	LACTOBACILLUS PHAGE PHIPYB5, COMPLETE GENOME. [25-AUG-2017]	LACTOBACILLUS	NC_014554.1	LACTOBACILLUS PLANTARUM SUBSP. PLANTARUM ST-III, COMPLETE GENOME	LACTOBACILLUS
-1.37555	GU396103.1	AEROMONAS PHAGE PX29, COMPLETE GENOME. [25-AUG-2017]	AEROMONAS	CP003241.1	VIBRIO SP. EJY3 CHROMOSOME 1, COMPLETE SEQUENCE	VIBRIO
-1.30547	GU477322.1	STAPHYLOCOCCUS PHAGE SAP-26, COMPLETE GENOME. [26-MAY-2017]	STAPHYLOCOCCUS	NC_009641.1	STAPHYLOCOCCUS AUREUS SUBSP. AUREUS STR. NEWMAN DNA, COMPLETE GENOME	STAPHYLOCOCCUS
-1.38159	GU557055.1	PUNICEISPIRILLUM PHAGE HMO-2011, COMPLETE GENOME. [26-MAY-2017]	PUNICEISPIRILLUM	CP002122.1	PREVOTELLA MELANINOGENICA ATCC 25845 CHROMOSOME I, COMPLETE SEQUENCE	PREVOTELLA
-1.35859	GU573886.1	SALMONELLA PHAGE ST160, COMPLETE GENOME. [25-AUG-2017]	SALMONELLA	CP007534.1	SALMONELLA ENTERICA SUBSP. ENTERICA SEROVAR ABONY STR. 0014, COMPLETE GENOME	SALMONELLA
-1.36945	GU580940.1	RHODOCOCCUS PHAGE REQIDOCB7, COMPLETE GENOME. [26-MAY-2017]	RHODOCOCCUS	NC_016631.1	GRANULICELLA MALLENSIS MP5ACTX8, COMPLETE GENOME	GRANULICELLA
-1.37561	GU580941.1	RHODOCOCCUS PHAGE REQIPEPY6, COMPLETE GENOME. [25-AUG-2017]	RHODOCOCCUS	NC_016631.1	GRANULICELLA MALLENSIS MP5ACTX8, COMPLETE GENOME	GRANULICELLA
-1.37502	GU580942.1	RHODOCOCCUS PHAGE REQIPOCO6, COMPLETE GENOME. [25-AUG-2017]	RHODOCOCCUS	NC_016631.1	GRANULICELLA MALLENSIS MP5ACTX8, COMPLETE GENOME	GRANULICELLA
-1.27083	GU580943.1	RHODOCOCCUS PHAGE REQIPINE5, COMPLETE GENOME. [26-MAY-2017]	RHODOCOCCUS	NC_018524.1	NOCARDIOPSIS ALBA ATCC BAA-2165, COMPLETE GENOME	NOCARDIOPSIS
-1.37216	GU583987.1	PSEUDOMONAS PHAGE PHIIBB-PF7A, COMPLETE GENOME. [25-AUG-2017]	PSEUDOMONAS	CP007152.1	MARINOBACTER SALARIUS STRAIN R9SW1, COMPLETE GENOME	MARINOBACTER
-1.36281	GU815091.1	PSEUDOMONAS PHAGE JG024, COMPLETE GENOME. [25-AUG-2017]	PSEUDOMONAS	NC_008009.1	CANDIDATUS KORIBACTER VERSATILIS ELLIN345, COMPLETE GENOME	CANDIDATUS
-1.3352	GU815339.1	ENTEROCOCCUS PHAGE EFRM31, COMPLETE GENOME. [25-AUG-2017]	ENTEROCOCCUS	NC_009632.1	STAPHYLOCOCCUS AUREUS SUBSP. AUREUS JH1, COMPLETE GENOME	STAPHYLOCOCCUS
-1.34943	GU903191.1	ESCHERICHIA PHAGE VB_ECOM_ECO1230-10, COMPLETE GENOME. [25-AUG-2017]	ESCHERICHIA	CP002797.2	ESCHERICHIA COLI NA114, COMPLETE GENOME	ESCHERICHIA
-1.25776	GU911303.1	BURKHOLDERIA PHAGE KS5, COMPLETE GENOME. [25-AUG-2017]	BURKHOLDERIA	AP009386.1	BURKHOLDERIA MULTIVORANS ATCC 17616 GENOMIC DNA, COMPLETE GENOME, CHROMOSOME 2	BURKHOLDERIA
-1.30201	GU911304.1	BURKHOLDERIA PHAGE KL3, COMPLETE GENOME. [25-AUG-2017]	BURKHOLDERIA	AM747720.1	BURKHOLDERIA CENOCEPACIA J2315 CHROMOSOME 1, COMPLETE GENOME	BURKHOLDERIA
-1.36619	GU911519.1	ACINETOBACTER PHAGE ACJ61, COMPLETE GENOME. [25-AUG-2017]	ACINETOBACTER	NC_015321.1	FLUVIICOLA TAFFENSIS DSM 16823, COMPLETE GENOME	FLUVIICOLA
-1.38334	GU936714.1	SYNECHOCOCCUS PHAGE S-CBS2, COMPLETE GENOME. [25-AUG-2017]	SYNECHOCOCCUS	CP007152.1	MARINOBACTER SALARIUS STRAIN R9SW1, COMPLETE GENOME	MARINOBACTER
-1.32896	GU936715.1	SYNECHOCOCCUS PHAGE S-CBS3, COMPLETE GENOME. [25-AUG-2017]	SYNECHOCOCCUS	NC_007516.1	SYNECHOCOCCUS SP. CC9605, COMPLETE GENOME	SYNECHOCOCCUS
-1.33109	GU942563.1	VIBRIO PHAGE CTX CHROMOSOME I PROPHAGE, COMPLETE SEQUENCE	VIBRIO	CP000626.1	VIBRIO CHOLERAE O395 CHROMOSOME 1, COMPLETE GENOME	VIBRIO
-1.27432	GU949551.1	CLOSTRIDIUM PHAGE PHICD6356, COMPLETE GENOME. [25-AUG-2017]	CLOSTRIDIUM	NC_009089.1	CLOSTRIDIOIDES DIFFICILE 630, COMPLETE GENOME	CLOSTRIDIOIDES
-1.39896	GU988610.2	PSEUDOMONAS PHAGE JG004, COMPLETE GENOME. [25-AUG-2017]	PSEUDOMONAS	CP009281.1	PAENIBACILLUS SP. FSL R5-0345, COMPLETE GENOME	PAENIBACILLUS
-1.29148	HE584812.1	PSEUDOMONAS PHAGE LPB1, COMPLATE GENOME [26-MAY-2017]	PSEUDOMONAS	CP011317.1	PSEUDOMONAS AERUGINOSA STRAIN CARB01 63, COMPLETE GENOME	PSEUDOMONAS
-1.38586	HE600015.1	DICKEYA PHAGE VB_DSOM_LIMESTONE1 COMPLETE GENOME [25-AUG-2017]	DICKEYA	CP007142.1	GYNUELLA SUNSHINYII YC6258, COMPLETE GENOME	GYNUELLA
-1.3634	HE608841.1	BACTEROIDES PHAGE B124-14 COMPLETE GENOME [26-MAY-2017]	BACTEROIDES	NC_004663.1	BACTEROIDES THETAIOTAOMICRON VPI-5482 CHROMOSOME, COMPLETE GENOME	BACTEROIDES
-1.38944	HE611333.2	PSEUDOMONAS PHAGE TF COMPLETE GENOME [25-AUG-2017]	PSEUDOMONAS	NC_014008.1	CORALIOMARGARITA AKAJIMENSIS DSM 45221, COMPLETE GENOME	CORALIOMARGARITA
-1.31464	HE614281.1	STAPHYLOCOCCUS PHAGE SPAA1 COMPLETE GENOME [26-MAY-2017]	STAPHYLOCOCCUS	CP010089.1	BACILLUS THURINGIENSIS SEROVAR GALLERIAE STRAIN HD-29, COMPLETE GENOME	BACILLUS
-1.31517	HE614282.1	BACILLUS PHAGE BCEA1 COMPLETE GENOME [26-MAY-2017]	BACILLUS	CP010089.1	BACILLUS THURINGIENSIS SEROVAR GALLERIAE STRAIN HD-29, COMPLETE GENOME	BACILLUS
-1.33545	HE664024.1	ESCHERICHIA PHAGE P13374 COMPLETE PROVIRAL GENOME	ESCHERICHIA	HF572917.2	ESCHERICHIA COLI HUSEC2011 COMPLETE GENOME	ESCHERICHIA
-1.39146	HE775250.1	SALMONELLA PHAGE VB_SENS-ENT1 COMPLETE GENOME [25-AUG-2017]	SALMONELLA	NC_003198.1	SALMONELLA ENTERICA SUBSP. ENTERICA SEROVAR TYPHI STR. CT18, COMPLETE GENOME	SALMONELLA
-1.34899	HE806280.1	ACINETOBACTER BACTERIOPHAGE AP22, COMPLETE GENOME [25-AUG-2017]	ACINETOBACTER	CP002522.2	ACINETOBACTER BAUMANNII TCDC-AB0715, COMPLETE GENOME	ACINETOBACTER
-1.28393	HE815464.1	CAMPYLOBACTER PHAGE CP21 COMPLETE SEQUENCE	CAMPYLOBACTER	CP006777.1	CLOSTRIDIUM BEIJERINCKII ATCC 35702, COMPLETE GENOME	CLOSTRIDIUM
-1.37626	HE858210.2	ENTEROBACTERIA PHAGE RB43, ISOLATE RB43-GVA COMPLETE GENOME [25-AUG-2017]	ENTEROBACTERIA	NC_013132.1	CHITINOPHAGA PINENSIS DSM 2588, COMPLETE GENOME	CHITINOPHAGA
-1.36525	HE861935.1	STREPTOCOCCUS PHAGE TP-J34 COMPLETE GENOME [25-AUG-2017]	STREPTOCOCCUS	NC_013798.1	STREPTOCOCCUS GALLOLYTICUS UCN34 COMPLETE GENOME	STREPTOCOCCUS
-1.37754	HE956708.2	YERSINIA PHAGE PHIR201 COMPLETE GENOME [25-AUG-2017]	YERSINIA	CP009279.1	PAENIBACILLUS SP. FSL H7-0737, COMPLETE GENOME	PAENIBACILLUS
-1.33982	HE956709.1	YERSINIA PHAGE PHIR1-RT COMPLETE GENOME [25-AUG-2017]	YERSINIA	CP007447.1	STAPHYLOCOCCUS AUREUS STRAIN XN108, COMPLETE GENOME	STAPHYLOCOCCUS
-1.39246	HE956710.2	YERSINIA PHAGE PHI80-18 COMPLETE GENOME [26-MAY-2017]	YERSINIA	CP009621.1	PONTIBACTER KORLENSIS STRAIN X14-1T, COMPLETE GENOME	PONTIBACTER
-1.3455	HE956711.1	YERSINIA PHAGE PHID1 COMPLETE GENOME [25-AUG-2017]	YERSINIA	CP007447.1	STAPHYLOCOCCUS AUREUS STRAIN XN108, COMPLETE GENOME	STAPHYLOCOCCUS
-1.37092	HE962497.1	STREPTOCOCCUS PHAGE SP-QS1 COMPLETE GENOME [25-AUG-2017]	STREPTOCOCCUS	NC_010001.1	LACHNOCLOSTRIDIUM PHYTOFERMENTANS ISDG, COMPLETE GENOME	LACHNOCLOSTRIDIUM
-1.37476	HE978309.1	ENTEROBACTERIA PHAGE GEC-3S COMPLETE GENOME	ENTEROBACTERIA	NC_015277.1	SPHINGOBACTERIUM SP. 21, COMPLETE GENOME	SPHINGOBACTERIUM
-1.3763	HE981739.1	ENTEROBACTERIA PHAGE RB43, ISOLATE RB43-GVA ORF057::GFP COMPLETE GENOME [25-AUG-2017]	ENTEROBACTERIA	NC_013132.1	CHITINOPHAGA PINENSIS DSM 2588, COMPLETE GENOME	CHITINOPHAGA
-1.39611	HE983844.1	PSEUDOMONAS PHAGE VB_PAEP_C1-14_OR COMPLETE GENOME [25-AUG-2017]	PSEUDOMONAS	NC_015152.1	SPHAEROCHAETA GLOBOSA STR. BUDDY, COMPLETE GENOME	SPHAEROCHAETA
-1.3961	HF543949.1	PSEUDOMONAS PHAGE VB_PAEP_P2-10_OR1, COMPLETE GENOME [25-AUG-2017]	PSEUDOMONAS	NC_015152.1	SPHAEROCHAETA GLOBOSA STR. BUDDY, COMPLETE GENOME	SPHAEROCHAETA
-1.32335	HF563658.1	STREPTOCOCCUS PHAGE PHIBHN167 COMPLETE GENOME [25-AUG-2017]	STREPTOCOCCUS	NC_011900.1	STREPTOCOCCUS PNEUMONIAE ATCC 700669 COMPLETE GENOME	STREPTOCOCCUS
-1.38787	HF569088.1	BRUCELLA PHAGE BK2 COMPLETE SEQUENCE	BRUCELLA	NC_016641.1	PAENIBACILLUS TERRAE HPL-003, COMPLETE GENOME	PAENIBACILLUS
-1.3883	HF569089.1	BRUCELLA PHAGE FI COMPLETE SEQUENCE	BRUCELLA	NC_016641.1	PAENIBACILLUS TERRAE HPL-003, COMPLETE GENOME	PAENIBACILLUS
-1.38786	HF569090.1	BRUCELLA PHAGE R/C COMPLETE SEQUENCE	BRUCELLA	NC_016641.1	PAENIBACILLUS TERRAE HPL-003, COMPLETE GENOME	PAENIBACILLUS
-1.38838	HF569091.1	BRUCELLA PHAGE TB COMPLETE SEQUENCE, ISOLATE BFR	BRUCELLA	NC_016641.1	PAENIBACILLUS TERRAE HPL-003, COMPLETE GENOME	PAENIBACILLUS
-1.38788	HF569092.1	BRUCELLA PHAGE WB COMPLETE SEQUENCE	BRUCELLA	NC_016641.1	PAENIBACILLUS TERRAE HPL-003, COMPLETE GENOME	PAENIBACILLUS
-1.34389	HG007973.1	STENOTROPHOMONAS PHAGE PHISMA7 PROVIRAL COMPLETE GENOME [25-AUG-2017]	STENOTROPHOMONAS	NC_017671.1	STENOTROPHOMONAS MALTOPHILIA D457 COMPLETE GENOME	STENOTROPHOMONAS
-1.36635	HG380752.1	STREPTOCOCCUS PHAGE TP-778L COMPLETE GENOME [25-AUG-2017]	STREPTOCOCCUS	NC_013798.1	STREPTOCOCCUS GALLOLYTICUS UCN34 COMPLETE GENOME	STREPTOCOCCUS
-1.36211	HG424323.1	STREPTOCOCCUS PHAGE 20617 COMPLETE PROPHAGE GENOME	STREPTOCOCCUS	NC_017581.1	STREPTOCOCCUS THERMOPHILUS JIM 8232 COMPLETE GENOME	STREPTOCOCCUS
-1.3882	HG428758.1	BRUCELLA PHAGE F1 COMPLETE GENOME [26-MAY-2017]	BRUCELLA	NC_016641.1	PAENIBACILLUS TERRAE HPL-003, COMPLETE GENOME	PAENIBACILLUS
-1.39603	HG518155.1	PSEUDOMONAS PHAGE TL COMPLETE GENOME [25-AUG-2017]	PSEUDOMONAS	CP001825.1	THERMOBACULUM TERRENUM ATCC BAA-798 CHROMOSOME 1, COMPLETE SEQUENCE	THERMOBACULUM
-1.26149	HG531805.1	CLOSTRIDIUM PHAGE CDMH1 COMPLETE GENOME [25-AUG-2017]	CLOSTRIDIUM	NC_009089.1	CLOSTRIDIOIDES DIFFICILE 630, COMPLETE GENOME	CLOSTRIDIOIDES
-1.33546	HG792102.1	ESCHERICHIA PHAGE P13803, COMPLETE GENOME	ESCHERICHIA	HF572917.2	ESCHERICHIA COLI HUSEC2011 COMPLETE GENOME	ESCHERICHIA
-1.33555	HG792103.1	ESCHERICHIA PHAGE P8983, COMPLETE GENOME	ESCHERICHIA	HF572917.2	ESCHERICHIA COLI HUSEC2011 COMPLETE GENOME	ESCHERICHIA
-1.33796	HG792104.1	ESCHERICHIA PHAGE P13771, COMPLETE GENOME	ESCHERICHIA	HF572917.2	ESCHERICHIA COLI HUSEC2011 COMPLETE GENOME	ESCHERICHIA
-1.33619	HG792105.1	ESCHERICHIA PHAGE P14437, COMPLETE GENOME	ESCHERICHIA	HF572917.2	ESCHERICHIA COLI HUSEC2011 COMPLETE GENOME	ESCHERICHIA
-1.3305	HG793132.1	BURKHOLDERIA PHAGE BP-AMP1 COMPLETE GENOME [26-MAY-2017]	BURKHOLDERIA	NC_019966.1	MYCOBACTERIUM SP. JS623, COMPLETE GENOME	MYCOBACTERIUM
-1.33043	HG796219.1	BURKHOLDERIA PHAGE BP-AMP2 COMPLETE GENOME [26-MAY-2017]	BURKHOLDERIA	NC_019966.1	MYCOBACTERIUM SP. JS623, COMPLETE GENOME	MYCOBACTERIUM
-1.33002	HG796220.1	BURKHOLDERIA PHAGE BP-AMP3 COMPLETE GENOME [26-MAY-2017]	BURKHOLDERIA	NC_019966.1	MYCOBACTERIUM SP. JS623, COMPLETE GENOME	MYCOBACTERIUM
-1.33061	HG796221.1	BURKHOLDERIA PHAGE BP-AMP4 COMPLETE GENOME [26-MAY-2017]	BURKHOLDERIA	NC_012490.1	RHODOCOCCUS ERYTHROPOLIS PR4 DNA, COMPLETE GENOME	RHODOCOCCUS
-1.28682	HG796225.1	CLOSTRIDIUM PHAGE PHICDHM13 COMPLETE GENOME [25-AUG-2017]	CLOSTRIDIUM	NC_009089.1	CLOSTRIDIOIDES DIFFICILE 630, COMPLETE GENOME	CLOSTRIDIOIDES
-1.32998	HG799490.1	STREPTOCOCCUS PHAGE IC1, COMPLETE SEQUENCE	STREPTOCOCCUS	NC_014498.1	STREPTOCOCCUS PNEUMONIAE 670-6B, COMPLETE GENOME	STREPTOCOCCUS
-1.33711	HG799496.1	STREPTOCOCCUS PHAGE K13, COMPLETE SEQUENCE	STREPTOCOCCUS	NC_014498.1	STREPTOCOCCUS PNEUMONIAE 670-6B, COMPLETE GENOME	STREPTOCOCCUS
-1.3298	HG799497.1	STREPTOCOCCUS PHAGE DCC1738, COMPLETE SEQUENCE	STREPTOCOCCUS	NC_014498.1	STREPTOCOCCUS PNEUMONIAE 670-6B, COMPLETE GENOME	STREPTOCOCCUS
-1.36507	HG803181.1	VIBRIO PHAGE PV94 COMPLETE GENOME [28-FEB-2015]	VIBRIO	CP010812.1	VIBRIO CHOLERAE STRAIN 10432-62, COMPLETE GENOME	VIBRIO
-1.33541	HG803182.1	ESCHERICHIA PHAGE P13363 COMPLETE GENOME	ESCHERICHIA	HF572917.2	ESCHERICHIA COLI HUSEC2011 COMPLETE GENOME	ESCHERICHIA
-1.39802	HG813241.1	CRONOBACTER PHAGE DEV2 COMPLETE GENOME [26-MAY-2017]	CRONOBACTER	NC_014008.1	CORALIOMARGARITA AKAJIMENSIS DSM 45221, COMPLETE GENOME	CORALIOMARGARITA
-1.40215	HG818823.1	CITROBACTER PHAGE CR44B COMPLETE GENOME [25-AUG-2017]	CITROBACTER	NC_014033.1	PREVOTELLA RUMINICOLA 23, COMPLETE GENOME	PREVOTELLA
-1.39423	HG818824.1	CITROBACTER PHAGE CR8 COMPLETE GENOME [25-AUG-2017]	CITROBACTER	NC_014033.1	PREVOTELLA RUMINICOLA 23, COMPLETE GENOME	PREVOTELLA
-1.39149	HG934469.1	SALMONELLA PHAGE VB_SENS-ENT2 COMPLETE GENOME	SALMONELLA	NC_012997.1	TEREDINIBACTER TURNERAE T7901, COMPLETE GENOME	TEREDINIBACTER
-1.39214	HG934470.1	SALMONELLA PHAGE VB_SENS-ENT3 COMPLETE GENOME [25-AUG-2017]	SALMONELLA	NC_012997.1	TEREDINIBACTER TURNERAE T7901, COMPLETE GENOME	TEREDINIBACTER
-1.36857	HG962375.1	PSEUDOMONAS PHAGE VB_PAEP_C2-10_AB09, COMPLETE GENOME [26-MAY-2017]	PSEUDOMONAS	CP007151.1	MARINOBACTER SIMILIS STRAIN A3D10, COMPLETE GENOME	MARINOBACTER
-1.37043	HM004124.1	ACINETOBACTER PHAGE ACJ9, COMPLETE GENOME. [25-AUG-2017]	ACINETOBACTER	CP002522.2	ACINETOBACTER BAUMANNII TCDC-AB0715, COMPLETE GENOME	ACINETOBACTER
-1.3283	HM029250.1	LACTOCOCCUS PHAGE 949, COMPLETE GENOME. [25-AUG-2017]	LACTOCOCCUS	NC_014393.1	CLOSTRIDIUM CELLULOVORANS 743B, COMPLETE GENOME	CLOSTRIDIUM
-1.35203	HM032710.1	ACINETOBACTER PHAGE AC42, COMPLETE GENOME. [25-AUG-2017]	ACINETOBACTER	CP007447.1	STAPHYLOCOCCUS AUREUS STRAIN XN108, COMPLETE GENOME	STAPHYLOCOCCUS
-1.38335	HM035024.1	SHIGELLA PHAGE SHFL1, COMPLETE GENOME. [25-AUG-2017]	SHIGELLA	NC_011740.1	ESCHERICHIA FERGUSONII ATCC 35469 CHROMOSOME, COMPLETE GENOME	ESCHERICHIA
-1.34542	HM035025.1	SHIGELLA PHAGE SHFL2, COMPLETE GENOME. [25-AUG-2017]	SHIGELLA	NC_017331.1	STAPHYLOCOCCUS AUREUS SUBSP. AUREUS TW20, COMPLETE GENOME	STAPHYLOCOCCUS
-1.33366	HM064452.1	RALSTONIA PHAGE PE226, COMPLETE GENOME. [25-AUG-2017]	RALSTONIA	CP001068.1	RALSTONIA PICKETTII 12J CHROMOSOME 1, COMPLETE SEQUENCE	RALSTONIA
-1.3973	HM066936.1	CAULOBACTER PHAGE PHICB5, COMPLETE GENOME. [13-NOV-2015]	CAULOBACTER	NC_017934.1	MESOTOGA PRIMA MESG1.AG.4.2, COMPLETE GENOME	MESOTOGA
-1.36837	HM071924.1	ENTEROBACTERIA PHAGE IME08, COMPLETE SEQUENCE	ENTEROBACTERIA	NC_017770.1	SOLITALEA CANADENSIS DSM 3403, COMPLETE GENOME	SOLITALEA
-1.35362	HM072038.1	BACILLUS PHAGE PHI105, COMPLETE GENOME. [25-AUG-2017]	BACILLUS	CP010406.1	BACILLUS SP. PC3, COMPLETE GENOME	BACILLUS
-1.26394	HM114277.1	RHODOCOCCUS PHAGE E3, COMPLETE GENOME. [26-MAY-2017]	RHODOCOCCUS	NC_022657.1	ACTINOPLANES FRIULIENSIS DSM 7358, COMPLETE GENOME	ACTINOPLANES
-1.37155	HM114315.1	ACINETOBACTER PHAGE 133, COMPLETE GENOME. [25-AUG-2017]	ACINETOBACTER	CP002522.2	ACINETOBACTER BAUMANNII TCDC-AB0715, COMPLETE GENOME	ACINETOBACTER
-1.37733	HM134276.1	ENTEROBACTERIA PHAGE RB16, COMPLETE GENOME. [25-AUG-2017]	ENTEROBACTERIA	NC_013132.1	CHITINOPHAGA PINENSIS DSM 2588, COMPLETE GENOME	CHITINOPHAGA
-1.34466	HM137666.1	ENTEROBACTERIA PHAGE T4T, COMPLETE GENOME. [25-AUG-2017]	ENTEROBACTERIA	CP007447.1	STAPHYLOCOCCUS AUREUS STRAIN XN108, COMPLETE GENOME	STAPHYLOCOCCUS
-1.3552	HM144385.1	BROCHOTHRIX PHAGE NF5, COMPLETE GENOME. [25-AUG-2017]	BROCHOTHRIX	CP006837.1	LYSINIBACILLUS VARIANS STRAIN GY32, COMPLETE GENOME	LYSINIBACILLUS
-1.34685	HM144386.1	BROCHOTHRIX PHAGE BL3, COMPLETE GENOME. [25-AUG-2017]	BROCHOTHRIX	CP000817.1	LYSINIBACILLUS SPHAERICUS C3-41, COMPLETE GENOME	LYSINIBACILLUS
-1.35666	HM144387.1	BACILLUS PHAGE W.PH., COMPLETE GENOME. [25-AUG-2017]	BACILLUS	NC_018500.1	BACILLUS THURINGIENSIS HD-771, COMPLETE GENOME	BACILLUS
-1.33948	HM150760.1	STENOTROPHOMONAS PHAGE PHISHP2, COMPLETE GENOME	STENOTROPHOMONAS	NC_008536.1	CANDIDATUS SOLIBACTER USITATUS ELLIN6076, COMPLETE GENOME	CANDIDATUS
-1.36844	HM151342.1	ROSEOBACTER PHAGE RDJL PHI 1, COMPLETE GENOME. [25-AUG-2017]	ROSEOBACTER	NC_019892.1	SINGULISPHAERA ACIDIPHILA DSM 18658, COMPLETE GENOME	SINGULISPHAERA
-1.37574	HM152763.1	MYCOBACTERIUM VIRUS BRON, COMPLETE GENOME. [29-SEP-2017]	MYCOBACTERIUM	NC_015564.1	HOYOSELLA SUBFLAVA DQS3-9A1, COMPLETE GENOME	HOYOSELLA
-1.28999	HM152764.1	MYCOBACTERIUM PHAGE ANGELICA, COMPLETE GENOME. [26-MAY-2017]	MYCOBACTERIUM	NC_019966.1	MYCOBACTERIUM SP. JS623, COMPLETE GENOME	MYCOBACTERIUM
-1.28562	HM152767.1	MYCOBACTERIUM PHAGE CRIMD, COMPLETE GENOME. [26-MAY-2017]	MYCOBACTERIUM	NC_019966.1	MYCOBACTERIUM SP. JS623, COMPLETE GENOME	MYCOBACTERIUM
-1.28561	HM152767.2	MYCOBACTERIUM VIRUS CRIMD, COMPLETE GENOME	MYCOBACTERIUM	NC_019966.1	MYCOBACTERIUM SP. JS623, COMPLETE GENOME	MYCOBACTERIUM
-1.30313	HM159959.1	CLOSTRIDIUM PHAGE PHICTP1, COMPLETE GENOME	CLOSTRIDIUM	NC_020291.1	CLOSTRIDIUM SACCHAROPERBUTYLACETONICUM N1-4(HMT), COMPLETE GENOME	CLOSTRIDIUM
-1.36821	HM173637.1	ESCHERICHIA PHAGE HK75, COMPLETE GENOME. [25-AUG-2017]	ESCHERICHIA	NC_011601.1	ESCHERICHIA COLI 0127:H6 E2348/69 COMPLETE GENOME, STRAIN E2348/69	ESCHERICHIA
-1.33796	HM208303.1	STX2 CONVERTING PHAGE VB_ECOP_24B, COMPLETE GENOME. [26-MAY-2017]	ESCHERICHIA	CP008957.1	ESCHERICHIA COLI O157:H7 STR. EDL933, COMPLETE GENOME	ESCHERICHIA
-1.36975	HM208537.1	ESCHERICHIA PHAGE HK639, COMPLETE GENOME. [26-MAY-2017]	ESCHERICHIA	CP007557.1	CITROBACTER FREUNDII CFNIH1, COMPLETE GENOME	CITROBACTER
-1.35279	HM368260.1	ACINETOBACTER PHAGE AB1, COMPLETE GENOME. [26-MAY-2017]	ACINETOBACTER	NC_016603.1	ACINETOBACTER PITTII PHEA-2 CHROMOSOME, COMPLETE GENOME	ACINETOBACTER
-1.37264	HM452125.1	AEROMONAS PHAGE PHIAS4, COMPLETE GENOME. [25-AUG-2017]	AEROMONAS	NC_015277.1	SPHINGOBACTERIUM SP. 21, COMPLETE GENOME	SPHINGOBACTERIUM
-1.38148	HM452126.1	AEROMONAS PHAGE PHIAS5, COMPLETE GENOME. [25-AUG-2017]	AEROMONAS	CP009279.1	PAENIBACILLUS SP. FSL H7-0737, COMPLETE GENOME	PAENIBACILLUS
-1.29906	HM461982.1	BURKHOLDERIA PHAGE KS14, COMPLETE GENOME. [25-AUG-2017]	BURKHOLDERIA	CP002519.1	BURKHOLDERIA SP. CCGE1001 CHROMOSOME 1, COMPLETE SEQUENCE	BURKHOLDERIA
-1.3476	HM480106.1	SYNECHOCOCCUS PHAGE S-CBS1, COMPLETE GENOME. [25-AUG-2017]	SYNECHOCOCCUS	CP006269.1	SYNECHOCOCCUS SP. KORDI-100, COMPLETE GENOME	SYNECHOCOCCUS
-1.39974	HM480846.1	ENTEROBACTERIA PHAGE K30, COMPLETE GENOME. [25-AUG-2017]	ENTEROBACTERIA	NC_014033.1	PREVOTELLA RUMINICOLA 23, COMPLETE GENOME	PREVOTELLA
-1.23838	HM486077.1	TSUKAMURELLA PHAGE TPA2, COMPLETE SEQUENCE	TSUKAMURELLA	CP009110.1	AMYCOLATOPSIS METHANOLICA 239, COMPLETE GENOME	AMYCOLATOPSIS
-1.38304	HM559717.1	SYNECHOCOCCUS PHAGE S-CBP4 GENOMIC SEQUENCE	SYNECHOCOCCUS	CP009279.1	PAENIBACILLUS SP. FSL H7-0737, COMPLETE GENOME	PAENIBACILLUS
-1.36997	HM563683.1	ENTEROBACTERIA PHAGE VB_ECOM-VR7, COMPLETE GENOME. [25-AUG-2017]	ENTEROBACTERIA	NC_017770.1	SOLITALEA CANADENSIS DSM 3403, COMPLETE GENOME	SOLITALEA
-1.29806	HM568888.1	CLOSTRIDIUM PHAGE PHICD38-2, COMPLETE GENOME. [26-MAY-2017]	CLOSTRIDIUM	NC_009089.1	CLOSTRIDIOIDES DIFFICILE 630, COMPLETE GENOME	CLOSTRIDIOIDES
-1.35943	HM588722.1	PSEUDOALTEROMONAS PHAGE H105/1, COMPLETE GENOME. [25-AUG-2017]	PSEUDOALTEROMONAS	NC_003910.7	COLWELLIA PSYCHRERYTHRAEA 34H, COMPLETE GENOME	COLWELLIA
-1.28719	HM624080.1	PSEUDOMONAS PHAGE PA1/KOR/2010, COMPLETE GENOME. [26-MAY-2017]	PSEUDOMONAS	NC_011770.1	PSEUDOMONAS AERUGINOSA LESB58 COMPLETE GENOME SEQUENCE	PSEUDOMONAS
-1.3725	HM753660.1	ENTEROBACTERIA PHAGE PHIX174 ISOLATE XC+MAD06IM1, COMPLETE GENOME. [26-MAY-2017]	ENTEROBACTERIA	NC_009654.1	MARINOMONAS SP. MWYL1, COMPLETE GENOME	MARINOMONAS
-1.37209	HM753691.1	ENTEROBACTERIA PHAGE PHIX174 ISOLATE XC+MAD22IC2, COMPLETE GENOME. [26-MAY-2017]	ENTEROBACTERIA	NC_009654.1	MARINOMONAS SP. MWYL1, COMPLETE GENOME	MARINOMONAS
-1.37191	HM753693.1	ENTEROBACTERIA PHAGE PHIX174 ISOLATE XC+MAD22IC6, COMPLETE GENOME. [26-MAY-2017]	ENTEROBACTERIA	NC_009654.1	MARINOMONAS SP. MWYL1, COMPLETE GENOME	MARINOMONAS
-1.37215	HM753696.1	ENTEROBACTERIA PHAGE PHIX174 ISOLATE XC+MAD22IM1, COMPLETE GENOME. [26-MAY-2017]	ENTEROBACTERIA	NC_009654.1	MARINOMONAS SP. MWYL1, COMPLETE GENOME	MARINOMONAS
-1.37121	HM753699.1	ENTEROBACTERIA PHAGE PHIX174 ISOLATE XC+MAD22IM4, COMPLETE GENOME. [26-MAY-2017]	ENTEROBACTERIA	NC_009654.1	MARINOMONAS SP. MWYL1, COMPLETE GENOME	MARINOMONAS
-1.37145	HM753707.1	ENTEROBACTERIA PHAGE PHIX174 ISOLATE XC+MBD22IC2, COMPLETE GENOME. [26-MAY-2017]	ENTEROBACTERIA	NC_009654.1	MARINOMONAS SP. MWYL1, COMPLETE GENOME	MARINOMONAS
-1.37179	HM753716.1	ENTEROBACTERIA PHAGE PHIX174 ISOLATE XC+MBD22IM6, COMPLETE GENOME. [26-MAY-2017]	ENTEROBACTERIA	NC_009654.1	MARINOMONAS SP. MWYL1, COMPLETE GENOME	MARINOMONAS
-1.33207	HM770079.1	SALMONELLA PHAGE RE-2010, COMPLETE GENOME. [25-AUG-2017]	SALMONELLA	CP007528.1	SALMONELLA ENTERICA SUBSP. ENTERICA SEROVAR ENTERITIDIS STR. CDC_2010K_0968, COMPLETE GENOME	SALMONELLA
-1.37984	HM997019.1	SALMONELLA PHAGE 7-11, COMPLETE GENOME. [25-AUG-2017]	SALMONELLA	CP003241.1	VIBRIO SP. EJY3 CHROMOSOME 1, COMPLETE SEQUENCE	VIBRIO
-1.34431	HM997020.1	ESCHERICHIA PHAGE WV7, COMPLETE GENOME. [25-AUG-2017]	ESCHERICHIA	NC_014759.1	MARIVIRGA TRACTUOSA DSM 4126, COMPLETE GENOME	MARIVIRGA
-1.3352	HQ110084.1	ERWINIA PHAGE ENT90, COMPLETE GENOME. [25-AUG-2017]	ERWINIA	CP008823.1	ENTEROBACTER CLOACAE ECNIH2, COMPLETE GENOME	ENTEROBACTER
-1.30059	HQ127381.1	STAPHYLOCOCCUS PHAGE TEM126, COMPLETE SEQUENCE	STAPHYLOCOCCUS	NC_009641.1	STAPHYLOCOCCUS AUREUS SUBSP. AUREUS STR. NEWMAN DNA, COMPLETE GENOME	STAPHYLOCOCCUS
-1.38319	HQ141410.1	LACTOBACILLUS PHAGE LF1, COMPLETE GENOME. [25-AUG-2017]	LACTOBACILLUS	NC_020229.1	LACTOBACILLUS PLANTARUM ZJ316, COMPLETE GENOME	LACTOBACILLUS
-1.36616	HQ141411.1	LACTOBACILLUS PHAGE SHA1, COMPLETE GENOME. [26-MAY-2017]	LACTOBACILLUS	CP004406.1	LACTOBACILLUS PLANTARUM DOMLA, COMPLETE GENOME	LACTOBACILLUS
-1.37159	HQ186308.1	ACINETOBACTER PHAGE PHIAB1, COMPLETE GENOME. [26-MAY-2017]	ACINETOBACTER	CP010817.1	MYROIDES PROFUNDI STRAIN D25, COMPLETE GENOME	MYROIDES
-1.36094	HQ201307.1	CRONOBACTER PHAGE ENT39118, COMPLETE GENOME	CRONOBACTER	CP006580.1	ENTEROBACTER CLOACAE P101, COMPLETE GENOME	ENTEROBACTER
-1.37642	HQ201308.1	CRONOBACTER PHAGE ENT47670, COMPLETE GENOME	CRONOBACTER	CP007557.1	CITROBACTER FREUNDII CFNIH1, COMPLETE GENOME	CITROBACTER
-1.33461	HQ224500.1	VIBRIO PHAGE CTX, COMPLETE SEQUENCE	VIBRIO	CP000626.1	VIBRIO CHOLERAE O395 CHROMOSOME 1, COMPLETE GENOME	VIBRIO
-1.36061	HQ225832.1	TETRASPHAERA PHAGE TJE1, COMPLETE GENOME. [26-MAY-2017]	TETRASPHAERA	NC_019892.1	SINGULISPHAERA ACIDIPHILA DSM 18658, COMPLETE GENOME	SINGULISPHAERA
-1.38266	HQ259103.1	SALMONELLA PHAGE SFP10, COMPLETE GENOME. [25-AUG-2017]	SALMONELLA	NC_023037.2	PAENIBACILLUS POLYMYXA CR1, COMPLETE GENOME	PAENIBACILLUS
-1.38189	HQ259105.1	ESCHERICHIA PHAGE VB_ECOP_G7C, COMPLETE GENOME. [25-AUG-2017]	ESCHERICHIA	CP009281.1	PAENIBACILLUS SP. FSL R5-0345, COMPLETE GENOME	PAENIBACILLUS
-1.37536	HQ268735.1	STREPTOCOCCUS PHAGE DP-1, COMPLETE GENOME. [26-MAY-2017]	STREPTOCOCCUS	NC_015321.1	FLUVIICOLA TAFFENSIS DSM 16823, COMPLETE GENOME	FLUVIICOLA
-1.36525	HQ316579.1	VIBRIO PHAGE HELENE 12B3 GENOMIC SEQUENCE	VIBRIO	NC_010001.1	LACHNOCLOSTRIDIUM PHYTOFERMENTANS ISDG, COMPLETE GENOME	LACHNOCLOSTRIDIUM
-1.35168	HQ316580.1	VIBRIO PHAGE DOUGLAS 12A4 GENOMIC SEQUENCE	VIBRIO	NC_003910.7	COLWELLIA PSYCHRERYTHRAEA 34H, COMPLETE GENOME	COLWELLIA
-1.36683	HQ316581.1	VIBRIO PHAGE MARTHA 12B12 GENOMIC SEQUENCE	VIBRIO	BA000031.2	VIBRIO PARAHAEMOLYTICUS RIMD 2210633 DNA, CHROMOSOME 1, COMPLETE SEQUENCE	VIBRIO
-1.37803	HQ316582.1	VIBRIO PHAGE HENRIETTE 12B8, COMPLETE GENOME. [25-AUG-2017]	VIBRIO	NC_020514.1	PARAGLACIECOLA PSYCHROPHILA 170, COMPLETE GENOME	PARAGLACIECOLA
-1.36752	HQ316583.1	CYANOPHAGE S-SSM4 GENOMIC SEQUENCE	CYANOPHAGE	NC_010001.1	LACHNOCLOSTRIDIUM PHYTOFERMENTANS ISDG, COMPLETE GENOME	LACHNOCLOSTRIDIUM
-1.37049	HQ316584.1	CYANOPHAGE SS120-1 GENOMIC SEQUENCE	CYANOPHAGE	NC_005042.1	PROCHLOROCOCCUS MARINUS SUBSP. MARINUS STR. CCMP1375 COMPLETE GENOME	PROCHLOROCOCCUS
-1.36861	HQ316603.1	CYANOPHAGE S-SSM6B GENOMIC SEQUENCE	CYANOPHAGE	NC_010001.1	LACHNOCLOSTRIDIUM PHYTOFERMENTANS ISDG, COMPLETE GENOME	LACHNOCLOSTRIDIUM
-1.39126	HQ316604.1	VIBRIO PHAGE SIO-2, COMPLETE GENOME. [26-MAY-2017]	VIBRIO	NC_021713.1	ALTEROMONAS MEDITERRANEA UM7, COMPLETE GENOME	ALTEROMONAS
-1.37963	HQ317290.1	SYNECHOCOCCUS PHAGE S-RIM2 R21_2007, COMPLETE GENOME. [25-AUG-2017]	SYNECHOCOCCUS	CP002122.1	PREVOTELLA MELANINOGENICA ATCC 25845 CHROMOSOME I, COMPLETE SEQUENCE	PREVOTELLA
-1.37959	HQ317291.1	SYNECHOCOCCUS PHAGE S-RIM2 R9_2006, COMPLETE GENOME. [25-AUG-2017]	SYNECHOCOCCUS	CP002122.1	PREVOTELLA MELANINOGENICA ATCC 25845 CHROMOSOME I, COMPLETE SEQUENCE	PREVOTELLA
-1.37971	HQ317292.1	SYNECHOCOCCUS PHAGE S-RIM2 R1_1999, COMPLETE GENOME. [25-AUG-2017]	SYNECHOCOCCUS	CP002122.1	PREVOTELLA MELANINOGENICA ATCC 25845 CHROMOSOME I, COMPLETE SEQUENCE	PREVOTELLA
-1.35784	HQ317384.2	SULFITOBACTER PHAGE PCB2047-C, COMPLETE GENOME	SULFITOBACTER	NC_015730.1	ROSEOBACTER LITORALIS OCH 149, COMPLETE GENOME	ROSEOBACTER
-1.37178	HQ317385.1	SYNECHOCOCCUS PHAGE S-RIM8 A.HR5, COMPLETE GENOME. [25-AUG-2017]	SYNECHOCOCCUS	NC_010628.1	NOSTOC PUNCTIFORME PCC 73102, COMPLETE GENOME	NOSTOC
-1.36767	HQ317386.1	VIBRIO PHAGE VBM1 GENOMIC SEQUENCE	VIBRIO	NC_009654.1	MARINOMONAS SP. MWYL1, COMPLETE GENOME	MARINOMONAS
-1.3748	HQ317387.2	SULFITOBACTER PHAGE PHICB2047-B GENOMIC SEQUENCE	SULFITOBACTER	NC_017595.1	STREPTOCOCCUS SALIVARIUS JIM8777 COMPLETE GENOME	STREPTOCOCCUS
-1.3803	HQ317388.1	SYNECHOCOCCUS PHAGE S-RIP1 GENOMIC SEQUENCE	SYNECHOCOCCUS	NC_021733.1	ACINETOBACTER BAUMANNII BJAB0715, COMPLETE GENOME	ACINETOBACTER
-1.39113	HQ317389.1	SYNECHOCOCCUS PHAGE S-RIP2 GENOMIC SEQUENCE	SYNECHOCOCCUS	FM954972.2	VIBRIO SPLENDIDUS LGP32 CHROMOSOME 1	VIBRIO
-1.35341	HQ317390.1	COLWELLIA PHAGE 9A, COMPLETE GENOME. [25-AUG-2017]	COLWELLIA	NC_003910.7	COLWELLIA PSYCHRERYTHRAEA 34H, COMPLETE GENOME	COLWELLIA
-1.33043	HQ317392.1	CELLULOPHAGA PHAGE PHISM GENOMIC SEQUENCE	CELLULOPHAGA	NC_014393.1	CLOSTRIDIUM CELLULOVORANS 743B, COMPLETE GENOME	CLOSTRIDIUM
-1.3726	HQ317393.2	VIBRIO PHAGE NT-1, COMPLETE GENOME	VIBRIO	FM954972.2	VIBRIO SPLENDIDUS LGP32 CHROMOSOME 1	VIBRIO
-1.35609	HQ331142.1	SALMONELLA PHAGE S16, COMPLETE GENOME. [25-AUG-2017]	SALMONELLA	NC_017770.1	SOLITALEA CANADENSIS DSM 3403, COMPLETE GENOME	SOLITALEA
-1.35695	HQ332137.1	PROCHLOROCOCCUS PHAGE P-SSP3 GENOMIC SEQUENCE	PROCHLOROCOCCUS	CP010327.1	MYROIDES SP. A21, COMPLETE GENOME	MYROIDES
-1.3745	HQ332138.1	PAENIBACILLUS PHAGE PG1 GENOMIC SEQUENCE	PAENIBACILLUS	CP009281.1	PAENIBACILLUS SP. FSL R5-0345, COMPLETE GENOME	PAENIBACILLUS
-1.36754	HQ332140.1	PROCHLOROCOCCUS PHAGE P-GSP1 GENOMIC SEQUENCE	PROCHLOROCOCCUS	CP010327.1	MYROIDES SP. A21, COMPLETE GENOME	MYROIDES
-1.29351	HQ332141.1	HALORUBRUM PHAGE CGPHI46 GENOMIC SEQUENCE	HALORUBRUM	NC_021313.1	SALINARCHAEUM SP. HARCHT-BSK1, COMPLETE GENOME	SALINARCHAEUM
-1.35911	HQ332142.2	SULFITOBACTER PHAGE PCB2047-A, COMPLETE GENOME	SULFITOBACTER	NC_015730.1	ROSEOBACTER LITORALIS OCH 149, COMPLETE GENOME	ROSEOBACTER
-1.39461	HQ333270.1	YERSINIA PHAGE YEP-PHI, COMPLETE GENOME. [25-AUG-2017]	YERSINIA	CP002122.1	PREVOTELLA MELANINOGENICA ATCC 25845 CHROMOSOME I, COMPLETE SEQUENCE	PREVOTELLA
-1.35063	HQ337021.1	PROCHLOROCOCCUS PHAGE P-SSM3 GENOMIC SEQUENCE	PROCHLOROCOCCUS	NC_010001.1	LACHNOCLOSTRIDIUM PHYTOFERMENTANS ISDG, COMPLETE GENOME	LACHNOCLOSTRIDIUM
-1.36369	HQ337022.1	PROCHLOROCOCCUS PHAGE P-SSP10 GENOMIC SEQUENCE	PROCHLOROCOCCUS	CP010327.1	MYROIDES SP. A21, COMPLETE GENOME	MYROIDES
-1.28686	HQ377372.1	LIBERIBACTER PHAGE SC1, COMPLETE GENOME. [26-MAY-2017]	LIBERIBACTER	NC_012985.3	CANDIDATUS LIBERIBACTER ASIATICUS STR. PSY62, COMPLETE GENOME	CANDIDATUS
-1.3394	HQ377373.1	LIBERIBACTER PHAGE SC2, COMPLETE GENOME. [26-MAY-2017]	LIBERIBACTER	NC_012985.3	CANDIDATUS LIBERIBACTER ASIATICUS STR. PSY62, COMPLETE GENOME	CANDIDATUS
-1.29126	HQ396194.1	RIEMERELLA PHAGE RAP44, COMPLETE GENOME. [25-AUG-2017]	RIEMERELLA	NC_014738.1	RIEMERELLA ANATIPESTIFER DSM 15868, COMPLETE GENOME	RIEMERELLA
-1.35063	HQ403646.1	GORDONIA PHAGE GTE2, COMPLETE SEQUENCE	GORDONIA	NC_015564.1	HOYOSELLA SUBFLAVA DQS3-9A1, COMPLETE GENOME	HOYOSELLA
-1.37009	HQ406778.1	ENTEROBACTERIA PHAGE SPC35, COMPLETE GENOME. [25-AUG-2017]	ENTEROBACTERIA	CP008852.1	PELOSINUS SP. UFO1, COMPLETE GENOME	PELOSINUS
-1.37218	HQ615693.1	SYNECHOCOCCUS PHAGE S-CRM01, COMPLETE GENOME. [25-AUG-2017]	SYNECHOCOCCUS	CP010976.1	PAENIBACILLUS SP. IHBB 10380, COMPLETE GENOME	PAENIBACILLUS
-1.39124	HQ630627.1	PSEUDOMONAS PHAGE PHIPA3, COMPLETE GENOME. [26-MAY-2017]	PSEUDOMONAS	CP003241.1	VIBRIO SP. EJY3 CHROMOSOME 1, COMPLETE SEQUENCE	VIBRIO
-1.33351	HQ632825.1	PROCHLOROCOCCUS PHAGE P-SSM5 GENOMIC SEQUENCE	PROCHLOROCOCCUS	NC_014393.1	CLOSTRIDIUM CELLULOVORANS 743B, COMPLETE GENOME	CLOSTRIDIUM
-1.35851	HQ632859.1	LOKTANELLA PHAGE PCB2051-A GENOMIC SEQUENCE	LOKTANELLA	NC_015730.1	ROSEOBACTER LITORALIS OCH 149, COMPLETE GENOME	ROSEOBACTER
-1.34344	HQ633071.1	SYNECHOCOCCUS PHAGE S-SKS1 GENOMIC SEQUENCE	SYNECHOCOCCUS	NC_010001.1	LACHNOCLOSTRIDIUM PHYTOFERMENTANS ISDG, COMPLETE GENOME	LACHNOCLOSTRIDIUM
-1.36364	HQ634152.1	PROCHLOROCOCCUS PHAGE P-SSP6, COMPLETE GENOME. [26-MAY-2017]	PROCHLOROCOCCUS	CP010327.1	MYROIDES SP. A21, COMPLETE GENOME	MYROIDES
-1.37341	HQ634153.1	SALICOLA PHAGE CGPHI29 GENOMIC SEQUENCE	SALICOLA	CP007152.1	MARINOBACTER SALARIUS STRAIN R9SW1, COMPLETE GENOME	MARINOBACTER
-1.35203	HQ634156.1	VIBRIO PHAGE PWH3A-P1 GENOMIC SEQUENCE	VIBRIO	NC_010001.1	LACHNOCLOSTRIDIUM PHYTOFERMENTANS ISDG, COMPLETE GENOME	LACHNOCLOSTRIDIUM
-1.35945	HQ634174.1	CYANOPHAGE MED4-213, COMPLETE GENOME. [25-AUG-2017]	CYANOPHAGE	NC_010001.1	LACHNOCLOSTRIDIUM PHYTOFERMENTANS ISDG, COMPLETE GENOME	LACHNOCLOSTRIDIUM
-1.3741	HQ634175.1	CYANOPHAGE P-RSM1 GENOMIC SEQUENCE	CYANOPHAGE	NC_010001.1	LACHNOCLOSTRIDIUM PHYTOFERMENTANS ISDG, COMPLETE GENOME	LACHNOCLOSTRIDIUM
-1.35108	HQ634176.1	CYANOPHAGE P-RSM3 GENOMIC SEQUENCE	CYANOPHAGE	CP010327.1	MYROIDES SP. A21, COMPLETE GENOME	MYROIDES
-1.38223	HQ634177.1	SYNECHOCOCCUS PHAGE S-CAM1 GENOMIC SEQUENCE	SYNECHOCOCCUS	CP009279.1	PAENIBACILLUS SP. FSL H7-0737, COMPLETE GENOME	PAENIBACILLUS
-1.36406	HQ634178.1	SYNECHOCOCCUS PHAGE S-CAM8 STRAIN S-CAM8 06008BI06, COMPLETE GENOME. [25-AUG-2017]	SYNECHOCOCCUS	NC_010001.1	LACHNOCLOSTRIDIUM PHYTOFERMENTANS ISDG, COMPLETE GENOME	LACHNOCLOSTRIDIUM
-1.38116	HQ634187.1	CYANOPHAGE KBS-S-2A GENOMIC SEQUENCE	CYANOPHAGE	NC_010999.1	LACTOBACILLUS CASEI BL23 COMPLETE GENOME, STRAIN BL23	LACTOBACILLUS
-1.39069	HQ634188.1	CYANOPHAGE KBS-P-1A GENOMIC SEQUENCE	CYANOPHAGE	CP003241.1	VIBRIO SP. EJY3 CHROMOSOME 1, COMPLETE SEQUENCE	VIBRIO
-1.37005	HQ634189.1	CYANOPHAGE SYN30 GENOMIC SEQUENCE	CYANOPHAGE	NC_010001.1	LACHNOCLOSTRIDIUM PHYTOFERMENTANS ISDG, COMPLETE GENOME	LACHNOCLOSTRIDIUM
-1.30313	HQ634192.1	CELLULOPHAGA PHAGE PHIST GENOMIC SEQUENCE	CELLULOPHAGA	NC_014393.1	CLOSTRIDIUM CELLULOVORANS 743B, COMPLETE GENOME	CLOSTRIDIUM
-1.36902	HQ634193.1	CYANOPHAGE P-RSM6 GENOMIC SEQUENCE	CYANOPHAGE	CP010817.1	MYROIDES PROFUNDI STRAIN D25, COMPLETE GENOME	MYROIDES
-1.38374	HQ634194.1	VIBRIO PHAGE VBP47 GENOMIC SEQUENCE	VIBRIO	FM954972.2	VIBRIO SPLENDIDUS LGP32 CHROMOSOME 1	VIBRIO
-1.36693	HQ634195.1	VIBRIO PHAGE EUGENE 12A10 GENOMIC SEQUENCE	VIBRIO	NC_010001.1	LACHNOCLOSTRIDIUM PHYTOFERMENTANS ISDG, COMPLETE GENOME	LACHNOCLOSTRIDIUM
-1.38243	HQ634196.1	VIBRIO PHAGE VBP32 GENOMIC SEQUENCE	VIBRIO	FM954972.2	VIBRIO SPLENDIDUS LGP32 CHROMOSOME 1	VIBRIO
-1.37439	HQ641340.1	VIBRIO PHAGE ICP3, COMPLETE GENOME. [25-AUG-2017]	VIBRIO	CP002122.1	PREVOTELLA MELANINOGENICA ATCC 25845 CHROMOSOME I, COMPLETE SEQUENCE	PREVOTELLA
-1.37441	HQ641343.1	VIBRIO PHAGE ICP3_2008_A, COMPLETE GENOME. [25-AUG-2017]	VIBRIO	CP002122.1	PREVOTELLA MELANINOGENICA ATCC 25845 CHROMOSOME I, COMPLETE SEQUENCE	PREVOTELLA
-1.37453	HQ641344.1	VIBRIO PHAGE ICP3_2007_A, COMPLETE GENOME. [25-AUG-2017]	VIBRIO	CP002122.1	PREVOTELLA MELANINOGENICA ATCC 25845 CHROMOSOME I, COMPLETE SEQUENCE	PREVOTELLA
-1.38421	HQ641345.1	VIBRIO PHAGE ICP2, COMPLETE GENOME. [26-MAY-2017]	VIBRIO	FM954972.2	VIBRIO SPLENDIDUS LGP32 CHROMOSOME 1	VIBRIO
-1.35942	HQ641347.1	VIBRIO PHAGE ICP1, COMPLETE GENOME. [25-AUG-2017]	VIBRIO	NC_010001.1	LACHNOCLOSTRIDIUM PHYTOFERMENTANS ISDG, COMPLETE GENOME	LACHNOCLOSTRIDIUM
-1.35963	HQ641350.1	VIBRIO PHAGE ICP1_2006_B, COMPLETE GENOME. [25-AUG-2017]	VIBRIO	NC_010001.1	LACHNOCLOSTRIDIUM PHYTOFERMENTANS ISDG, COMPLETE GENOME	LACHNOCLOSTRIDIUM
-1.3593	HQ641353.1	VIBRIO PHAGE ICP1_2001_A, COMPLETE GENOME. [25-AUG-2017]	VIBRIO	NC_010001.1	LACHNOCLOSTRIDIUM PHYTOFERMENTANS ISDG, COMPLETE GENOME	LACHNOCLOSTRIDIUM
-1.34832	HQ641380.1	ENTEROBACTER PHAGE ECP1, COMPLETE GENOME. [26-MAY-2017]	ENTEROBACTER	NC_017770.1	SOLITALEA CANADENSIS DSM 3403, COMPLETE GENOME	SOLITALEA
-1.36872	HQ665011.1	ESCHERICHIA PHAGE BV_ECOS_AKFV33, COMPLETE GENOME. [25-AUG-2017]	ESCHERICHIA	CP008852.1	PELOSINUS SP. UFO1, COMPLETE GENOME	PELOSINUS
-1.36026	HQ683709.1	PLANKTOTHRIX PHAGE PAV-LD, COMPLETE GENOME. [26-MAY-2017]	PLANKTOTHRIX	NC_011726.1	CYANOTHECE SP. PCC 8801, COMPLETE GENOME	CYANOTHECE
-1.38323	HQ698895.1	SYNECHOCOCCUS PHAGE S-CBS4, COMPLETE GENOME. [26-MAY-2017]	SYNECHOCOCCUS	NC_014366.1	GAMMA PROTEOBACTERIUM HDN1 COMPLETE GENOME	PROTEOBACTERIUM
-1.33137	HQ698922.4	ACINETOBACTER PHAGE ZZ1, COMPLETE GENOME	ACINETOBACTER	NC_021670.1	STAPHYLOCOCCUS AUREUS BMB9393, COMPLETE GENOME	STAPHYLOCOCCUS
-1.32716	HQ711984.1	PSEUDOMONAS PHAGE PHI297, COMPLETE GENOME. [25-AUG-2017]	PSEUDOMONAS	AP012280.1	PSEUDOMONAS AERUGINOSA NCGM2.S1 DNA, COMPLETE GENOME	PSEUDOMONAS
-1.36437	HQ711985.1	PSEUDOMONAS PHAGE VB_PAES_PMG1, COMPLETE GENOME. [26-MAY-2017]	PSEUDOMONAS	NC_016631.1	GRANULICELLA MALLENSIS MP5ACTX8, COMPLETE GENOME	GRANULICELLA
-1.37657	HQ728264.1	ERWINIA PHAGE VB_EAMM-Y2, COMPLETE GENOME. [25-AUG-2017]	ERWINIA	CP003241.1	VIBRIO SP. EJY3 CHROMOSOME 1, COMPLETE SEQUENCE	VIBRIO
-1.39263	HQ728265.1	ERWINIA PHAGE VB_EAMP-L1, COMPLETE GENOME. [25-AUG-2017]	ERWINIA	NC_014008.1	CORALIOMARGARITA AKAJIMENSIS DSM 45221, COMPLETE GENOME	CORALIOMARGARITA
-1.3745	HQ728266.1	ERWINIA PHAGE VB_EAMP-S6, COMPLETE GENOME. [25-AUG-2017]	ERWINIA	CP007142.1	GYNUELLA SUNSHINYII YC6258, COMPLETE GENOME	GYNUELLA
-1.33953	HQ728524.1	MYCOBACTERIUM PHAGE WEE, COMPLETE GENOME. [26-MAY-2017]	MYCOBACTERIUM	AP014547.1	MYCOBACTERIUM ABSCESSUS SUBSP. BOLLETII CCUG 48898 = JCM 15300 DNA, COMPLETE GENOME	MYCOBACTERIUM
-1.36827	HQ829472.1	ENTEROBACTERIA PHAGE BP7, COMPLETE GENOME. [25-AUG-2017]	ENTEROBACTERIA	CP009278.1	SPHINGOBACTERIUM SP. ML3W, COMPLETE GENOME	SPHINGOBACTERIUM
-1.39907	HQ832595.1	PSEUDOMONAS PHAGE PAP1, COMPLETE GENOME. [25-AUG-2017]	PSEUDOMONAS	CP009281.1	PAENIBACILLUS SP. FSL R5-0345, COMPLETE GENOME	PAENIBACILLUS
-1.33346	HQ906662.1	WOLBACHIA ENDOSYMBIONT WVITA OF NASONIA VITRIPENNIS PHAGE WOVITA1, COMPLETE SEQUENCE	WOLBACHIA	NC_014393.1	CLOSTRIDIUM CELLULOVORANS 743B, COMPLETE GENOME	CLOSTRIDIUM
-1.37591	HQ918180.1	KLEBSIELLA PHAGE KP27, COMPLETE GENOME. [25-AUG-2017]	KLEBSIELLA	NC_015277.1	SPHINGOBACTERIUM SP. 21, COMPLETE GENOME	SPHINGOBACTERIUM
-1.36615	J02451.1	NTEROBACTERIA PHAGE FD STRAIN 478, COMPLETE GENOME. [25-AUG-2017]	NTEROBACTERIA	NC_019676.1	NOSTOC SP. PCC 7107, COMPLETE GENOME	NOSTOC
-1.334	J02459.1	NTEROBACTERIA PHAGE LAMBDA, COMPLETE GENOME. [25-AUG-2017]	NTEROBACTERIA	NC_013941.1	ESCHERICHIA COLI O55:H7 STR. CB9615, COMPLETE GENOME	ESCHERICHIA
-1.35979	JF270478.1	PSYCHROBACTER PHAGE PSYMV2, COMPLETE GENOME. [26-MAY-2017]	PSYCHROBACTER	NC_021661.1	PSYCHROBACTER SP. G, COMPLETE GENOME	PSYCHROBACTER
-1.3802	JF344709.1	BDELLOVIBRIO PHAGE PHI1402, COMPLETE SEQUENCE	BDELLOVIBRIO	NC_019567.1	BDELLOVIBRIO BACTERIOVORUS STR. TIBERIUS, COMPLETE GENOME	BDELLOVIBRIO
-1.36712	JF461087.1	SALMONELLA PHAGE FO1A, COMPLETE GENOME. [25-AUG-2017]	SALMONELLA	CP007631.2	STREPTOCOCCUS AGALACTIAE STRAIN NGBS061, COMPLETE GENOME	STREPTOCOCCUS
-1.37319	JF501022.1	KLEBSIELLA PHAGE KP36, COMPLETE GENOME. [25-AUG-2017]	KLEBSIELLA	NC_018658.1	ESCHERICHIA COLI O104:H4 STR. 2011C-3493 CHROMOSOME, COMPLETE GENOME	ESCHERICHIA
-1.28135	JF704091.1	MYCOBACTERIUM PHAGE ABU, COMPLETE SEQUENCE	MYCOBACTERIUM	NC_018289.1	MYCOBACTERIUM SMEGMATIS STR. MC2 155, COMPLETE GENOME	MYCOBACTERIUM
-1.29732	JF704092.1	MYCOBACTERIUM PHAGE ALICE, COMPLETE SEQUENCE	MYCOBACTERIUM	CP009914.1	MYCOBACTERIUM SP. VKM AC-1817D, COMPLETE GENOME	MYCOBACTERIUM
-1.2983	JF704096.1	MYCOBACTERIUM PHAGE GHOST, COMPLETE SEQUENCE	MYCOBACTERIUM	CP009914.1	MYCOBACTERIUM SP. VKM AC-1817D, COMPLETE GENOME	MYCOBACTERIUM
-1.31619	JF704098.1	MYCOBACTERIUM VIRUS JHC117, COMPLETE GENOME	MYCOBACTERIUM	NC_015635.1	MICROLUNATUS PHOSPHOVORUS NM-1 DNA, COMPLETE GENOME	MICROLUNATUS
-1.28203	JF704102.1	MYCOBACTERIUM PHAGE PHIPPS, COMPLETE SEQUENCE	MYCOBACTERIUM	NC_018289.1	MYCOBACTERIUM SMEGMATIS STR. MC2 155, COMPLETE GENOME	MYCOBACTERIUM
-1.28241	JF704103.1	MYCOBACTERIUM PHAGE VORTEX, COMPLETE SEQUENCE	MYCOBACTERIUM	NC_008596.1	MYCOBACTERIUM SMEGMATIS STR. MC2 155 CHROMOSOME, COMPLETE GENOME	MYCOBACTERIUM
-1.28236	JF704109.1	MYCOBACTERIUM PHAGE OOSTERBAAN, COMPLETE SEQUENCE	MYCOBACTERIUM	NC_018289.1	MYCOBACTERIUM SMEGMATIS STR. MC2 155, COMPLETE GENOME	MYCOBACTERIUM
-1.32789	JF704110.1	MYCOBACTERIUM VIRUS PACKMAN, COMPLETE GENOME	MYCOBACTERIUM	NC_012490.1	RHODOCOCCUS ERYTHROPOLIS PR4 DNA, COMPLETE GENOME	RHODOCOCCUS
-1.37629	JF704113.1	MYCOBACTERIUM PHAGE UPIE, COMPLETE SEQUENCE	MYCOBACTERIUM	NC_015564.1	HOYOSELLA SUBFLAVA DQS3-9A1, COMPLETE GENOME	HOYOSELLA
-1.29841	JF704116.1	MYCOBACTERIUM PHAGE DRAZDYS, COMPLETE GENOME	MYCOBACTERIUM	CP009914.1	MYCOBACTERIUM SP. VKM AC-1817D, COMPLETE GENOME	MYCOBACTERIUM
-1.38999	JF712866.1	VIBRIO PHAGE PHIVC8, COMPLETE GENOME. [26-MAY-2017]	VIBRIO	CP002377.1	VIBRIO FURNISSII NCTC 11218 CHROMOSOME 1, COMPLETE SEQUENCE	VIBRIO
-1.29251	JF734911.1	HELICOBACTER PHAGE PHIHP33, COMPLETE GENOME. [26-MAY-2017]	HELICOBACTER	NC_017372.1	HELICOBACTER PYLORI INDIA7, COMPLETE GENOME	HELICOBACTER
-1.37717	JF744988.1	MYCOBACTERIUM PHAGE FAITH1, COMPLETE GENOME. [26-MAY-2017]	MYCOBACTERIUM	NC_015564.1	HOYOSELLA SUBFLAVA DQS3-9A1, COMPLETE GENOME	HOYOSELLA
-1.29713	JF767208.1	CLOSTRIDIUM PHAGE PHI13O, COMPLETE GENOME. [26-MAY-2017]	CLOSTRIDIUM	NC_020291.1	CLOSTRIDIUM SACCHAROPERBUTYLACETONICUM N1-4(HMT), COMPLETE GENOME	CLOSTRIDIUM
-1.2995	JF767209.1	CLOSTRIDIUM PHAGE PHI34O, COMPLETE GENOME. [26-MAY-2017]	CLOSTRIDIUM	NC_009617.1	CLOSTRIDIUM BEIJERINCKII NCIMB 8052, COMPLETE GENOME	CLOSTRIDIUM
-1.29635	JF767210.1	CLOSTRIDIUM PHAGE PHI9O, COMPLETE GENOME. [26-MAY-2017]	CLOSTRIDIUM	NC_020291.1	CLOSTRIDIUM SACCHAROPERBUTYLACETONICUM N1-4(HMT), COMPLETE GENOME	CLOSTRIDIUM
-1.37993	JF770475.1	ESCHERICHIA PHAGE PHIEB49, COMPLETE GENOME. [25-AUG-2017]	ESCHERICHIA	CP009281.1	PAENIBACILLUS SP. FSL R5-0345, COMPLETE GENOME	PAENIBACILLUS
-1.33791	JF773396.1	LIBERIBACTER PHAGE FP2, COMPLETE GENOME. [26-MAY-2017]	LIBERIBACTER	NC_012985.3	CANDIDATUS LIBERIBACTER ASIATICUS STR. PSY62, COMPLETE GENOME	CANDIDATUS
-1.34003	JF832915.1	HAEMOPHILUS PHAGE SUMU, COMPLETE SEQUENCE	HAEMOPHILUS	CP005384.1	HAEMOPHILUS PARASUIS ZJ0906, COMPLETE GENOME	HAEMOPHILUS
-1.36367	JF900176.1	SALMONELLA PHAGE SPN9CC, COMPLETE GENOME. [25-AUG-2017]	SALMONELLA	HF937208.1	SALMONELLA ENTERICA SUBSP. ENTERICA SEROVAR TYPHIMURIUM DT104 MAIN CHROMOSOME, COMPLETE GENOME	SALMONELLA
-1.36679	JF912400.1	CRONOBACTER PHAGE ESP2949-1, COMPLETE GENOME. [25-AUG-2017]	CRONOBACTER	NC_017626.1	ESCHERICHIA COLI 042 COMPLETE GENOME	ESCHERICHIA
-1.29347	JF923796.1	GORDONIA PHAGE GTE5, COMPLETE GENOME. [26-MAY-2017]	GORDONIA	CP007219.1	AMYCOLATOPSIS LURIDA NRRL 2430, COMPLETE GENOME	AMYCOLATOPSIS
-1.28603	JF923797.1	GORDONIA PHAGE GRU1, COMPLETE GENOME. [26-MAY-2017]	GORDONIA	NC_018581.1	GORDONIA SP. KTR9, COMPLETE GENOME	GORDONIA
-1.33442	JF937091.1	MYCOBACTERIUM PHAGE BASK21, COMPLETE GENOME. [25-AUG-2017]	MYCOBACTERIUM	AP014547.1	MYCOBACTERIUM ABSCESSUS SUBSP. BOLLETII CCUG 48898 = JCM 15300 DNA, COMPLETE GENOME	MYCOBACTERIUM
-1.33443	JF937091.2	MYCOBACTERIUM PHAGE BASK21, COMPLETE GENOME	MYCOBACTERIUM	AP014547.1	MYCOBACTERIUM ABSCESSUS SUBSP. BOLLETII CCUG 48898 = JCM 15300 DNA, COMPLETE GENOME	MYCOBACTERIUM
-1.28254	JF937097.1	MYCOBACTERIUM PHAGE HERTUBISE, COMPLETE GENOME. [26-MAY-2017]	MYCOBACTERIUM	NC_018289.1	MYCOBACTERIUM SMEGMATIS STR. MC2 155, COMPLETE GENOME	MYCOBACTERIUM
-1.35122	JF939047.1	BURKHOLDERIA PHAGE KL1, COMPLETE GENOME. [26-MAY-2017]	BURKHOLDERIA	NC_015717.1	HYPHOMICROBIUM SP. MC1 CHROMOSOME, COMPLETE GENOME	HYPHOMICROBIUM
-1.32611	JF946695.1	MYCOBACTERIUM PHAGE SWU1, COMPLETE GENOME. [25-AUG-2017]	MYCOBACTERIUM	NC_016604.1	MYCOBACTERIUM RHODESIAE NBB3, COMPLETE GENOME	MYCOBACTERIUM
-1.28206	JF957056.1	MYCOBACTERIUM PHAGE THORA, COMPLETE GENOME. [26-MAY-2017]	MYCOBACTERIUM	NC_018289.1	MYCOBACTERIUM SMEGMATIS STR. MC2 155, COMPLETE GENOME	MYCOBACTERIUM
-1.35544	JF957059.1	MYCOBACTERIUM PHAGE OPTIMUS, COMPLETE GENOME. [25-AUG-2017]	MYCOBACTERIUM	AP014547.1	MYCOBACTERIUM ABSCESSUS SUBSP. BOLLETII CCUG 48898 = JCM 15300 DNA, COMPLETE GENOME	MYCOBACTERIUM
-1.36474	JF966203.1	BACILLUS PHAGE BASTILLE, COMPLETE GENOME. [25-AUG-2017]	BACILLUS	NC_010001.1	LACHNOCLOSTRIDIUM PHYTOFERMENTANS ISDG, COMPLETE GENOME	LACHNOCLOSTRIDIUM
-1.34803	JF974286.1	CYANOPHAGE MED4-184 GENOMIC SEQUENCE	CYANOPHAGE	AP014583.1	WINOGRADSKYELLA SP. PG-2 DNA, COMPLETE GENOME	WINOGRADSKYELLA
-1.37591	JF974287.1	VIBRIO PHAGE PYD21-A GENOMIC SEQUENCE	VIBRIO	NC_009654.1	MARINOMONAS SP. MWYL1, COMPLETE GENOME	MARINOMONAS
-1.37202	JF974288.1	SYNECHOCOCCUS PHAGE S-RIM8 A.HR1, COMPLETE GENOME. [25-AUG-2017]	SYNECHOCOCCUS	NC_010628.1	NOSTOC PUNCTIFORME PCC 73102, COMPLETE GENOME	NOSTOC
-1.37201	JF974289.1	SYNECHOCOCCUS PHAGE S-RIM8 A.HR3, COMPLETE GENOME. [25-AUG-2017]	SYNECHOCOCCUS	NC_010628.1	NOSTOC PUNCTIFORME PCC 73102, COMPLETE GENOME	NOSTOC
-1.37157	JF974293.1	CYANOPHAGE KBS-M-1A GENOMIC SEQUENCE	CYANOPHAGE	NC_010628.1	NOSTOC PUNCTIFORME PCC 73102, COMPLETE GENOME	NOSTOC
-1.37366	JF974294.1	AEROMONAS PHAGE PIS4-A GENOMIC SEQUENCE	AEROMONAS	NC_008800.1	YERSINIA ENTEROCOLITICA SUBSP. ENTEROCOLITICA 8081 CHROMOSOME, COMPLETE GENOME	YERSINIA
-1.36913	JF974295.1	PSYCHROBACTER PHAGE POW20-A GENOMIC SEQUENCE	PSYCHROBACTER	NC_021661.1	PSYCHROBACTER SP. G, COMPLETE GENOME	PSYCHROBACTER
-1.36437	JF974296.1	PSEUDOALTEROMONAS PHAGE PYD6-A GENOMIC SEQUENCE	PSEUDOALTEROMONAS	CP010817.1	MYROIDES PROFUNDI STRAIN D25, COMPLETE GENOME	MYROIDES
-1.31876	JF974307.1	RHODOVULUM PHAGE RS1 GENOMIC SEQUENCE	RHODOVULUM	CP010313.1	BRADYRHIZOBIUM JAPONICUM STRAIN E109, COMPLETE GENOME	BRADYRHIZOBIUM
-1.31746	JF974308.1	RHODOBACTER PHAGE RC1 GENOMIC SEQUENCE	RHODOBACTER	NC_018000.1	SINORHIZOBIUM FREDII USDA 257, COMPLETE GENOME	SINORHIZOBIUM
-1.37186	JF974312.1	VIBRIO PHAGE PYD38-A GENOMIC SEQUENCE	VIBRIO	CP004083.1	ENTEROBACTERIACEAE BACTERIUM BTA3-1, COMPLETE GENOME	ENTEROBACTERIACEAE
-1.3548	JF974314.1	RHIZOBIUM PHAGE RR1-A GENOMIC SEQUENCE	RHIZOBIUM	HG916852.1	RHIZOBIUM SP. LPU83 MAIN CHROSOME COMPLETE GENOME	RHIZOBIUM
-1.33072	JF974315.1	RHIZOBIUM PHAGE RR1-B GENOMIC SEQUENCE	RHIZOBIUM	CP002248.1	AGROBACTERIUM SP. H13-3 CIRCULAR CHROMOSOME, COMPLETE SEQUENCE	AGROBACTERIUM
-1.34861	JF974321.1	CYANOPHAGE MED4-117 GENOMIC SEQUENCE	CYANOPHAGE	AP014583.1	WINOGRADSKYELLA SP. PG-2 DNA, COMPLETE GENOME	WINOGRADSKYELLA
-1.36142	JF974339.1	ENTEROBACTERIA PHAGE IME10, COMPLETE GENOME. [25-AUG-2017]	ENTEROBACTERIA	NC_016902.1	ESCHERICHIA COLI KO11, COMPLETE GENOME	ESCHERICHIA
-1.33219	JN006061.1	MYCOBACTERIUM PHAGE TOTO, COMPLETE GENOME. [25-AUG-2017]	MYCOBACTERIUM	AP014547.1	MYCOBACTERIUM ABSCESSUS SUBSP. BOLLETII CCUG 48898 = JCM 15300 DNA, COMPLETE GENOME	MYCOBACTERIUM
-1.28455	JN006064.1	MYCOBACTERIUM PHAGE OSMAXIMUS, COMPLETE GENOME. [26-MAY-2017]	MYCOBACTERIUM	NC_018289.1	MYCOBACTERIUM SMEGMATIS STR. MC2 155, COMPLETE GENOME	MYCOBACTERIUM
-1.37091	JN022534.1	XANTHOMONAS PHAGE VB_XVEM_DIBBI, COMPLETE GENOME. [25-AUG-2017]	XANTHOMONAS	NC_017641.1	ESCHERICHIA COLI UMNK88, COMPLETE GENOME	ESCHERICHIA
-1.36799	JN035618.1	GORDONIA PHAGE GTE7, COMPLETE GENOME. [26-MAY-2017]	GORDONIA	NC_016631.1	GRANULICELLA MALLENSIS MP5ACTX8, COMPLETE GENOME	GRANULICELLA
-1.38381	JN051154.1	PEDIOCOCCUS PHAGE CLP1, COMPLETE GENOME. [25-AUG-2017]	PEDIOCOCCUS	NC_021514.1	LACTOBACILLUS PLANTARUM 16, COMPLETE GENOME	LACTOBACILLUS
-1.26593	JN116822.1	RHODOCOCCUS PHAGE RRH1, COMPLETE GENOME. [25-AUG-2017]	RHODOCOCCUS	NC_012522.1	RHODOCOCCUS OPACUS B4 DNA, COMPLETE GENOME	RHODOCOCCUS
-1.30104	JN116823.1	RHODOCOCCUS PHAGE REQ2, COMPLETE GENOME. [26-MAY-2017]	RHODOCOCCUS	NC_016604.1	MYCOBACTERIUM RHODESIAE NBB3, COMPLETE GENOME	MYCOBACTERIUM
-1.29912	JN116824.1	RHODOCOCCUS PHAGE REQ3, COMPLETE GENOME. [26-MAY-2017]	RHODOCOCCUS	CP003949.1	RHODOCOCCUS OPACUS PD630, COMPLETE GENOME	RHODOCOCCUS
-1.27836	JN116825.1	RHODOCOCCUS PHAGE REQ1, COMPLETE GENOME. [25-AUG-2017]	RHODOCOCCUS	CP003949.1	RHODOCOCCUS OPACUS PD630, COMPLETE GENOME	RHODOCOCCUS
-1.3359	JN116826.1	RHODOCOCCUS PHAGE RGL3, COMPLETE GENOME. [25-AUG-2017]	RHODOCOCCUS	NC_012490.1	RHODOCOCCUS ERYTHROPOLIS PR4 DNA, COMPLETE GENOME	RHODOCOCCUS
-1.36633	JN116827.1	RHODOCOCCUS PHAGE RER2, COMPLETE GENOME. [25-AUG-2017]	RHODOCOCCUS	NC_012490.1	RHODOCOCCUS ERYTHROPOLIS PR4 DNA, COMPLETE GENOME	RHODOCOCCUS
-1.2772	JN116828.1	NOCARDIA PHAGE NBR1, COMPLETE GENOME. [25-AUG-2017]	NOCARDIA	NC_016582.1	STREPTOMYCES BINGCHENGGENSIS BCW-1, COMPLETE GENOME	STREPTOMYCES
-1.38283	JN126049.1	SALMONELLA PHAGE PHISH19, COMPLETE GENOME. [25-AUG-2017]	SALMONELLA	NC_023037.2	PAENIBACILLUS POLYMYXA CR1, COMPLETE GENOME	PAENIBACILLUS
-1.26196	JN132397.1	CAMPYLOBACTER PHAGE CPX, COMPLETE GENOME. [25-AUG-2017]	CAMPYLOBACTER	CP009933.1	CLOSTRIDIUM SCATOLOGENES STRAIN ATCC 25775, COMPLETE GENOME	CLOSTRIDIUM
-1.32252	JN153085.1	MYCOBACTERIUM PHAGE DOOM, COMPLETE GENOME. [25-AUG-2017]	MYCOBACTERIUM	NC_016604.1	MYCOBACTERIUM RHODESIAE NBB3, COMPLETE GENOME	MYCOBACTERIUM
-1.32502	JN153086.1	MYCOBACTERIUM PHAGE EUPHORIA, COMPLETE GENOME. [25-AUG-2017]	MYCOBACTERIUM	NC_016604.1	MYCOBACTERIUM RHODESIAE NBB3, COMPLETE GENOME	MYCOBACTERIUM
-1.38455	JN175269.1	PSEUDOMONAS PHAGE PHI_PTO-BP6G, COMPLETE GENOME. [26-MAY-2017]	PSEUDOMONAS	NC_015276.1	MARINOMONAS MEDITERRANEA MMB-1, COMPLETE GENOME	MARINOMONAS
-1.29108	JN190960.1	RHODOBACTER PHAGE RCAPMU, COMPLETE GENOME. [26-MAY-2017]	RHODOBACTER	NC_014034.1	RHODOBACTER CAPSULATUS SB 1003, COMPLETE GENOME	RHODOBACTER
-1.29596	JN191664.1	BACILLUS PHAGE BTCS33, COMPLETE GENOME. [26-MAY-2017]	BACILLUS	NC_020238.1	BACILLUS THURINGIENSIS SEROVAR KURSTAKI STR. HD73, COMPLETE GENOME	BACILLUS
-1.34126	JN192400.1	STAPHYLOCOCCUS PHAGE VB_SEPIS-PHIIPLA5, COMPLETE GENOME. [25-AUG-2017]	STAPHYLOCOCCUS	NC_009487.1	STAPHYLOCOCCUS AUREUS SUBSP. AUREUS JH9, COMPLETE GENOME	STAPHYLOCOCCUS
-1.34132	JN192401.1	STAPHYLOCOCCUS PHAGE VB_SEPIS-PHIIPLA7, COMPLETE GENOME. [25-AUG-2017]	STAPHYLOCOCCUS	NC_009632.1	STAPHYLOCOCCUS AUREUS SUBSP. AUREUS JH1, COMPLETE GENOME	STAPHYLOCOCCUS
-1.28335	JN192463.1	MYCOBACTERIUM PHAGE OLINE, COMPLETE GENOME. [26-MAY-2017]	MYCOBACTERIUM	NC_018289.1	MYCOBACTERIUM SMEGMATIS STR. MC2 155, COMPLETE GENOME	MYCOBACTERIUM
-1.35506	JN201525.1	MYCOBACTERIUM PHAGE THIBAULT, COMPLETE GENOME. [25-AUG-2017]	MYCOBACTERIUM	AP014547.1	MYCOBACTERIUM ABSCESSUS SUBSP. BOLLETII CCUG 48898 = JCM 15300 DNA, COMPLETE GENOME	MYCOBACTERIUM
-1.34621	JN202312.1	ENTEROBACTERIA PHAGE IME09, COMPLETE GENOME. [25-AUG-2017]	ENTEROBACTERIA	NC_017770.1	SOLITALEA CANADENSIS DSM 3403, COMPLETE GENOME	SOLITALEA
-1.36566	JN225449.1	ENTEROBACTERIA PHAGE UAB_PHI87, COMPLETE GENOME. [25-AUG-2017]	ENTEROBACTERIAL	NC_015558.1	STREPTOCOCCUS PARAUBERIS KCTC 11537, COMPLETE GENOME	STREPTOCOCCUS
-1.2978	JN243855.1	MYCOBACTERIUM PHAGE LARVA, COMPLETE GENOME. [26-MAY-2017]	MYCOBACTERIUM	NC_019966.1	MYCOBACTERIUM SP. JS623, COMPLETE GENOME	MYCOBACTERIUM
-1.32226	JN243857.1	MYCOBACTERIUM PHAGE WILE, COMPLETE GENOME. [25-AUG-2017]	MYCOBACTERIUM	NC_016604.1	MYCOBACTERIUM RHODESIAE NBB3, COMPLETE GENOME	MYCOBACTERIUM
-1.36259	JN254800.1	PSEUDOMONAS PHAGE NH-4, COMPLETE GENOME. [25-AUG-2017]	PSEUDOMONAS	NC_008009.1	CANDIDATUS KORIBACTER VERSATILIS ELLIN345, COMPLETE GENOME	CANDIDATUS
-1.29032	JN255163.1	MANNHEIMIA PHAGE VB_MHM_1152AP, COMPLETE GENOME. [25-AUG-2017]	MANNHEIMIA	CP011099.1	MANNHEIMIA HAEMOLYTICA STRAIN 89010807N LKTA-, COMPLETE GENOME	MANNHEIMIA
-1.27901	JN256079.1	MYCOBACTERIUM PHAGE CHARLIE, COMPLETE GENOME. [25-AUG-2017]	MYCOBACTERIUM	NC_018289.1	MYCOBACTERIUM SMEGMATIS STR. MC2 155, COMPLETE GENOME	MYCOBACTERIUM
-1.36336	JN371768.1	SYNECHOCOCCUS PHAGE S-MBCM6, COMPLETE GENOME. [25-AUG-2017]	SYNECHOCOCCUS	NC_010001.1	LACHNOCLOSTRIDIUM PHYTOFERMENTANS ISDG, COMPLETE GENOME	LACHNOCLOSTRIDIUM
-1.37158	JN371769.1	SYNECHOCOCCUS PHAGE METAG-MBCM1, COMPLETE GENOME. [25-AUG-2017]	SYNECHOCOCCUS	NC_010001.1	LACHNOCLOSTRIDIUM PHYTOFERMENTANS ISDG, COMPLETE GENOME	LACHNOCLOSTRIDIUM
-1.37359	JN377894.1	AEROMONAS PHAGE AES508, COMPLETE GENOME. [25-AUG-2017]	AEROMONAS	NC_015277.1	SPHINGOBACTERIUM SP. 21, COMPLETE GENOME	SPHINGOBACTERIUM
-1.37345	JN377895.1	AEROMONAS PHAGE AES012, COMPLETE GENOME. [25-AUG-2017]	AEROMONAS	NC_015321.1	FLUVIICOLA TAFFENSIS DSM 16823, COMPLETE GENOME	FLUVIICOLA
-1.33313	JN382248.1	MYCOBACTERIUM PHAGE LILAC, COMPLETE GENOME. [25-AUG-2017]	MYCOBACTERIUM	NC_018150.2	MYCOBACTERIUM ABSCESSUS SUBSP. MASSILIENSE STR. GO 06, COMPLETE GENOME	MYCOBACTERIUM
-1.36844	JN391180.1	SALMONELLA PHAGE SPN1S, COMPLETE GENOME. [26-MAY-2017]	SALMONELLA	NC_017641.1	ESCHERICHIA COLI UMNK88, COMPLETE GENOME	ESCHERICHIA
-1.34249	JN398368.1	MYCOBACTERIUM PHAGE GUMBIE, COMPLETE GENOME. [26-MAY-2017]	MYCOBACTERIUM	NC_016604.1	MYCOBACTERIUM RHODESIAE NBB3, COMPLETE GENOME	MYCOBACTERIUM
-1.32011	JN398369.1	MYCOBACTERIUM PHAGE RIDGECB, COMPLETE GENOME. [25-AUG-2017]	MYCOBACTERIUM	NC_016604.1	MYCOBACTERIUM RHODESIAE NBB3, COMPLETE GENOME	MYCOBACTERIUM
-1.31467	JN408460.1	MYCOBACTERIUM PHAGE TURBIDO, COMPLETE GENOME. [25-AUG-2017]	MYCOBACTERIUM	NC_016604.1	MYCOBACTERIUM RHODESIAE NBB3, COMPLETE GENOME	MYCOBACTERIUM
-1.30575	JN408461.1	MYCOBACTERIUM PHAGE TRIXIE, COMPLETE GENOME. [25-AUG-2017]	MYCOBACTERIUM	NC_016604.1	MYCOBACTERIUM RHODESIAE NBB3, COMPLETE GENOME	MYCOBACTERIUM
-1.29702	JN412588.1	MYCOBACTERIUM PHAGE DANDELION, COMPLETE GENOME. [25-AUG-2017]	MYCOBACTERIUM	CP009914.1	MYCOBACTERIUM SP. VKM AC-1817D, COMPLETE GENOME	MYCOBACTERIUM
-1.38385	JN412589.1	MYCOBACTERIUM PHAGE PATIENCE, COMPLETE GENOME. [26-MAY-2017]	MYCOBACTERIUM	NC_018025.1	DESULFOMONILE TIEDJEI DSM 6799, COMPLETE GENOME	DESULFOMONILE
-1.33394	JN412590.1	MYCOBACTERIUM PHAGE EUREKA, COMPLETE GENOME. [25-AUG-2017]	MYCOBACTERIUM	CP009615.1	MYCOBACTERIUM ABSCESSUS STRAIN DJO-44274, COMPLETE GENOME	MYCOBACTERIUM
-1.27539	JN412591.1	MYCOBACTERIUM PHAGE BIGNUZ, COMPLETE GENOME. [26-MAY-2017]	MYCOBACTERIUM	CP009494.1	MYCOBACTERIUM SMEGMATIS STR. MC2 155, COMPLETE GENOME	MYCOBACTERIUM
-1.29535	JN412592.1	MYCOBACTERIUM PHAGE LINSTU, COMPLETE GENOME. [25-AUG-2017]	MYCOBACTERIUM	CP009914.1	MYCOBACTERIUM SP. VKM AC-1817D, COMPLETE GENOME	MYCOBACTERIUM
-1.27861	JN412593.1	MYCOBACTERIUM PHAGE LIEFIE, COMPLETE GENOME. [25-AUG-2017]	MYCOBACTERIUM	NC_016604.1	MYCOBACTERIUM RHODESIAE NBB3, COMPLETE GENOME	MYCOBACTERIUM
-1.34407	JN542517.1	MYCOBACTERIUM PHAGE DRAGO, COMPLETE GENOME. [26-MAY-2017]	MYCOBACTERIUM	AP014547.1	MYCOBACTERIUM ABSCESSUS SUBSP. BOLLETII CCUG 48898 = JCM 15300 DNA, COMPLETE GENOME	MYCOBACTERIUM
-1.31482	JN564907.1	BURKHOLDERIA PHAGE AH2, COMPLETE GENOME. [26-MAY-2017]	BURKHOLDERIA	CP010518.3	PANDORAEA APISTA STRAIN TF81F4, COMPLETE GENOME	PANDORAEA
-1.32424	JN572689.1	MYCOBACTERIUM PHAGE PERSEUS, COMPLETE GENOME. [25-AUG-2017]	MYCOBACTERIUM	NC_016604.1	MYCOBACTERIUM RHODESIAE NBB3, COMPLETE GENOME	MYCOBACTERIUM
-1.32203	JN585957.1	ERWINIA PHAGE PEP14, COMPLETE GENOME. [26-MAY-2017]	ERWINIA	NC_018028.1	PSEUDOMONAS STUTZERI CCUG 29243, COMPLETE GENOME	PSEUDOMONAS
-1.38326	JN593240.1	ESCHERICHIA VIRUS CBA120, COMPLETE GENOME. [12-SEP-2017]	ESCHERICHIA	CP009279.1	PAENIBACILLUS SP. FSL H7-0737, COMPLETE GENOME	PAENIBACILLUS
-1.3766	JN600672.1	MYCOBACTERIUM PHAGE FEZZIK, COMPLETE GENOME. [26-MAY-2017]	MYCOBACTERIUM	NC_015564.1	HOYOSELLA SUBFLAVA DQS3-9A1, COMPLETE GENOME	HOYOSELLA
-1.36142	JN600960.1	ENTEROBACTERIA PHAGE IME10, COMPLETE GENOME. [25-AUG-2017]	ENTEROBACTERIA	NC_016902.1	ESCHERICHIA COLI KO11, COMPLETE GENOME	ESCHERICHIA
-1.29703	JN624850.1	MYCOBACTERIUM PHAGE PLEIONE, COMPLETE GENOME. [25-AUG-2017]	MYCOBACTERIUM	CP009914.1	MYCOBACTERIUM SP. VKM AC-1817D, COMPLETE GENOME	MYCOBACTERIUM
-1.28048	JN624851.1	MYCOBACTERIUM PHAGE REDI, COMPLETE GENOME. [25-AUG-2017]	MYCOBACTERIUM	NC_008596.1	MYCOBACTERIUM SMEGMATIS STR. MC2 155 CHROMOSOME, COMPLETE GENOME	MYCOBACTERIUM
-1.38345	JN627160.1	PSEUDOMONAS PHAGE OBP, COMPLETE GENOME. [26-MAY-2017]	PSEUDOMONAS	CP003241.1	VIBRIO SP. EJY3 CHROMOSOME 1, COMPLETE SEQUENCE	VIBRIO
-1.29825	JN638751.1	BACILLUS PHAGE G, COMPLETE GENOME. [25-AUG-2017]	BACILLUS	NC_020291.1	CLOSTRIDIUM SACCHAROPERBUTYLACETONICUM N1-4(HMT), COMPLETE GENOME	CLOSTRIDIUM
-1.39033	JN641803.1	SALMONELLA PHAGE SPN3US, COMPLETE GENOME. [26-MAY-2017]	SALMONELLA	NC_018658.1	ESCHERICHIA COLI O104:H4 STR. 2011C-3493 CHROMOSOME, COMPLETE GENOME	ESCHERICHIA
-1.28801	JN643714.1	MYCOBACTERIUM PHAGE BARRELROLL, COMPLETE GENOME. [26-MAY-2017]	MYCOBACTERIUM	NC_019966.1	MYCOBACTERIUM SP. JS623, COMPLETE GENOME	MYCOBACTERIUM
-1.37487	JN651747.1	AEROMONAS PHAGE PHIAS7, COMPLETE GENOME. [26-MAY-2017]	AEROMONAS	NC_017506.1	MARINOBACTER ADHAERENS HP15, COMPLETE GENOME	MARINOBACTER
-1.36924	JN654439.1	BACILLUS PHAGE BPS13, COMPLETE GENOME. [25-AUG-2017]	BACILLUS	CP010817.1	MYROIDES PROFUNDI STRAIN D25, COMPLETE GENOME	MYROIDES
-1.32143	JN660814.1	MYCOBACTERIUM PHAGE DREAMBOAT, COMPLETE GENOME. [25-AUG-2017]	MYCOBACTERIUM	NC_016604.1	MYCOBACTERIUM RHODESIAE NBB3, COMPLETE GENOME	MYCOBACTERIUM
-1.26887	JN662425.1	BURKHOLDERIA PHAGE DC1, COMPLETE GENOME. [26-MAY-2017]	BURKHOLDERIA	CP000614.1	BURKHOLDERIA VIETNAMIENSIS G4 CHROMOSOME 1, COMPLETE SEQUENCE	BURKHOLDERIA
-1.3828	JN673056.1	ESCHERICHIA PHAGE PHAXI, COMPLETE GENOME. [25-AUG-2017]	ESCHERICHIA	NC_023037.2	PAENIBACILLUS POLYMYXA CR1, COMPLETE GENOME	PAENIBACILLUS
-1.37714	JN680858.1	MYCOBACTERIUM PHAGE RUMPELSTILTSKIN, COMPLETE GENOME. [26-MAY-2017]	MYCOBACTERIUM	NC_015564.1	HOYOSELLA SUBFLAVA DQS3-9A1, COMPLETE GENOME	HOYOSELLA
-1.3227	JN687951.1	MYCOBACTERIUM PHAGE VIOLET, COMPLETE GENOME. [25-AUG-2017]	MYCOBACTERIUM	NC_016604.1	MYCOBACTERIUM RHODESIAE NBB3, COMPLETE GENOME	MYCOBACTERIUM
-1.28154	JN698989.1	MYCOBACTERIUM PHAGE JACATTAC, COMPLETE GENOME. [26-MAY-2017]	MYCOBACTERIUM	NC_018289.1	MYCOBACTERIUM SMEGMATIS STR. MC2 155, COMPLETE GENOME	MYCOBACTERIUM
-1.28159	JN698990.1	MYCOBACTERIUM PHAGE ISAACELI, COMPLETE GENOME. [26-MAY-2017]	MYCOBACTERIUM	NC_018289.1	MYCOBACTERIUM SMEGMATIS STR. MC2 155, COMPLETE GENOME	MYCOBACTERIUM
-1.26815	JN698992.1	MYCOBACTERIUM PHAGE GADJET, COMPLETE GENOME. [26-MAY-2017]	MYCOBACTERIUM	CP007219.1	AMYCOLATOPSIS LURIDA NRRL 2430, COMPLETE GENOME	AMYCOLATOPSIS
-1.29087	JN698993.1	MYCOBACTERIUM PHAGE FIRECRACKER, COMPLETE GENOME. [25-AUG-2017]	MYCOBACTERIUM	CP009914.1	MYCOBACTERIUM SP. VKM AC-1817D, COMPLETE GENOME	MYCOBACTERIUM
-1.28654	JN698994.1	MYCOBACTERIUM PHAGE DS6A, COMPLETE GENOME. [25-AUG-2017]	MYCOBACTERIUM	CP009483.1	MYCOBACTERIUM KANSASII 824, COMPLETE GENOME	MYCOBACTERIUM
-1.29297	JN698995.1	MYCOBACTERIUM PHAGE DORI, COMPLETE GENOME. [26-MAY-2017]	MYCOBACTERIUM	NC_016604.1	MYCOBACTERIUM RHODESIAE NBB3, COMPLETE GENOME	MYCOBACTERIUM
-1.34198	JN698996.1	MYCOBACTERIUM PHAGE DEADP, COMPLETE GENOME. [26-MAY-2017]	MYCOBACTERIUM	AP014547.1	MYCOBACTERIUM ABSCESSUS SUBSP. BOLLETII CCUG 48898 = JCM 15300 DNA, COMPLETE GENOME	MYCOBACTERIUM
-1.35188	JN698997.1	MYCOBACTERIUM PHAGE COURTHOUSE, COMPLETE GENOME. [25-AUG-2017]	MYCOBACTERIUM	AP014547.1	MYCOBACTERIUM ABSCESSUS SUBSP. BOLLETII CCUG 48898 = JCM 15300 DNA, COMPLETE GENOME	MYCOBACTERIUM
-1.32557	JN698998.1	MYCOBACTERIUM PHAGE BRUNS, COMPLETE GENOME. [25-AUG-2017]	MYCOBACTERIUM	CP009914.1	MYCOBACTERIUM SP. VKM AC-1817D, COMPLETE GENOME	MYCOBACTERIUM
-1.3376	JN698999.1	MYCOBACTERIUM PHAGE BLUE7, COMPLETE GENOME. [25-AUG-2017]	MYCOBACTERIUM	NC_012490.1	RHODOCOCCUS ERYTHROPOLIS PR4 DNA, COMPLETE GENOME	RHODOCOCCUS
-1.32622	JN699000.1	MYCOBACTERIUM PHAGE BILLKNUCKLES, COMPLETE GENOME. [25-AUG-2017]	MYCOBACTERIUM	NC_016604.1	MYCOBACTERIUM RHODESIAE NBB3, COMPLETE GENOME	MYCOBACTERIUM
-1.26539	JN699001.1	MYCOBACTERIUM PHAGE BABSIELLA, COMPLETE GENOME. [25-AUG-2017]	MYCOBACTERIUM	CP009494.1	MYCOBACTERIUM SMEGMATIS STR. MC2 155, COMPLETE GENOME	MYCOBACTERIUM
-1.28069	JN699002.1	MYCOBACTERIUM PHAGE AVRAFAN, COMPLETE GENOME. [25-AUG-2017]	MYCOBACTERIUM	NC_019966.1	MYCOBACTERIUM SP. JS623, COMPLETE GENOME	MYCOBACTERIUM
-1.32921	JN699005.1	MYCOBACTERIUM PHAGE ALMA, COMPLETE GENOME. [25-AUG-2017]	MYCOBACTERIUM	NC_012490.1	RHODOCOCCUS ERYTHROPOLIS PR4 DNA, COMPLETE GENOME	RHODOCOCCUS
-1.26845	JN699006.1	MYCOBACTERIUM PHAGE AKOMA, COMPLETE GENOME. [26-MAY-2017]	MYCOBACTERIUM	CP007219.1	AMYCOLATOPSIS LURIDA NRRL 2430, COMPLETE GENOME	AMYCOLATOPSIS
-1.26556	JN699007.1	MYCOBACTERIUM PHAGE ACADIAN, COMPLETE GENOME. [26-MAY-2017]	MYCOBACTERIUM	NC_013131.1	CATENULISPORA ACIDIPHILA DSM 44928, COMPLETE GENOME	CATENULISPORA
-1.28198	JN699008.1	MYCOBACTERIUM PHAGE VISTA, COMPLETE GENOME. [26-MAY-2017]	MYCOBACTERIUM	NC_018289.1	MYCOBACTERIUM SMEGMATIS STR. MC2 155, COMPLETE GENOME	MYCOBACTERIUM
-1.28128	JN699009.1	MYCOBACTERIUM PHAGE THREEOH3D2, COMPLETE GENOME. [26-MAY-2017]	MYCOBACTERIUM	NC_018289.1	MYCOBACTERIUM SMEGMATIS STR. MC2 155, COMPLETE GENOME	MYCOBACTERIUM
-1.2689	JN699011.1	MYCOBACTERIUM PHAGE STINGER, COMPLETE GENOME. [26-MAY-2017]	MYCOBACTERIUM	NC_021191.1	ACTINOPLANES SP. N902-109, COMPLETE GENOME	ACTINOPLANES
-1.33996	JN699012.1	MYCOBACTERIUM PHAGE SG4, COMPLETE GENOME. [25-AUG-2017]	MYCOBACTERIUM	AP014547.1	MYCOBACTERIUM ABSCESSUS SUBSP. BOLLETII CCUG 48898 = JCM 15300 DNA, COMPLETE GENOME	MYCOBACTERIUM
-1.32344	JN699016.1	MYCOBACTERIUM PHAGE KUGEL, COMPLETE GENOME. [25-AUG-2017]	MYCOBACTERIUM	NC_016604.1	MYCOBACTERIUM RHODESIAE NBB3, COMPLETE GENOME	MYCOBACTERIUM
-1.28159	JN699017.1	MYCOBACTERIUM PHAGE KIKIPOO, COMPLETE GENOME. [26-MAY-2017]	MYCOBACTERIUM	NC_018289.1	MYCOBACTERIUM SMEGMATIS STR. MC2 155, COMPLETE GENOME	MYCOBACTERIUM
-1.33568	JN699019.1	MYCOBACTERIUM PHAGE JEFFABUNNY, COMPLETE GENOME. [25-AUG-2017]	MYCOBACTERIUM	NC_012490.1	RHODOCOCCUS ERYTHROPOLIS PR4 DNA, COMPLETE GENOME	RHODOCOCCUS
-1.29789	JN699625.1	MYCOBACTERIUM PHAGE WALLY, COMPLETE GENOME. [25-AUG-2017]	MYCOBACTERIUM	CP009914.1	MYCOBACTERIUM SP. VKM AC-1817D, COMPLETE GENOME	MYCOBACTERIUM
-1.29651	JN699626.1	MYCOBACTERIUM PHAGE MOMOMIXON, COMPLETE GENOME. [25-AUG-2017]	MYCOBACTERIUM	CP009914.1	MYCOBACTERIUM SP. VKM AC-1817D, COMPLETE GENOME	MYCOBACTERIUM
-1.29736	JN699627.1	MYCOBACTERIUM PHAGE NAPPY, COMPLETE GENOME. [25-AUG-2017]	MYCOBACTERIUM	CP009914.1	MYCOBACTERIUM SP. VKM AC-1817D, COMPLETE GENOME	MYCOBACTERIUM
-1.34012	JN699628.1	MYCOBACTERIUM PHAGE BONGO, COMPLETE GENOME. [26-MAY-2017]	MYCOBACTERIUM	NC_019966.1	MYCOBACTERIUM SP. JS623, COMPLETE GENOME	MYCOBACTERIUM
-1.32326	JN700519.1	STAPHYLOCOCCUS PHAGE STB27, COMPLETE GENOME. [25-AUG-2017]	STAPHYLOCOCCUS	NC_017331.1	STAPHYLOCOCCUS AUREUS SUBSP. AUREUS TW20, COMPLETE GENOME	STAPHYLOCOCCUS
-1.33321	JN700520.2	STAPHYLOCOCCUS PHAGE STB12, COMPLETE GENOME. [25-AUG-2017]	STAPHYLOCOCCUS	NC_017331.1	STAPHYLOCOCCUS AUREUS SUBSP. AUREUS TW20, COMPLETE GENOME	STAPHYLOCOCCUS
-1.32636	JN700521.1	STAPHYLOCOCCUS PHAGE STB20, COMPLETE GENOME. [25-AUG-2017]	STAPHYLOCOCCUS	HG813242.1	STAPHYLOCOCCUS EPIDERMIDIS PM221 COMPLETE GENOME	STAPHYLOCOCCUS
-1.3518	JN712910.1	BACILLUS PHAGE BCD7, COMPLETE GENOME. [25-AUG-2017]	BACILLUS	NC_012581.1	BACILLUS ANTHRACIS STR. CDC 684, COMPLETE GENOME	BACILLUS
-1.36079	JN790865.1	BACILLUS PHAGE B4, COMPLETE GENOME. [25-AUG-2017]	BACILLUS	CP010327.1	MYROIDES SP. A21, COMPLETE GENOME	MYROIDES
-1.36078	JN797796.1	BACILLUS PHAGE B5S, COMPLETE GENOME. [25-AUG-2017]	BACILLUS	CP010327.1	MYROIDES SP. A21, COMPLETE GENOME	MYROIDES
-1.37546	JN797797.1	BACILLUS PHAGE BCP78, COMPLETE GENOME. [25-AUG-2017]	BACILLUS	CP010976.1	PAENIBACILLUS SP. IHBB 10380, COMPLETE GENOME	PAENIBACILLUS
-1.37543	JN797798.1	BACILLUS PHAGE BCU4, COMPLETE GENOME. [25-AUG-2017]	BACILLUS	CP010817.1	MYROIDES PROFUNDI STRAIN D25, COMPLETE GENOME	MYROIDES
-1.27632	JN800508.1	CLOSTRIDIUM PHAGE PHI24R, COMPLETE GENOME. [26-MAY-2017]	CLOSTRIDIUM	NC_020291.1	CLOSTRIDIUM SACCHAROPERBUTYLACETONICUM N1-4(HMT), COMPLETE GENOME	CLOSTRIDIUM
-1.30551	JN808773.1	PSEUDOMONAS PHAGE F_HA0480SP/PA1651, COMPLETE GENOME. [26-MAY-2017]	PSEUDOMONAS	NC_011770.1	PSEUDOMONAS AERUGINOSA LESB58 COMPLETE GENOME SEQUENCE	PSEUDOMONAS
-1.2948	JN811560.1	PSEUDOMONAS PHAGE JBD26, COMPLETE GENOME. [26-MAY-2017]	PSEUDOMONAS	CP011317.1	PSEUDOMONAS AERUGINOSA STRAIN CARB01 63, COMPLETE GENOME	PSEUDOMONAS
-1.26418	JN831653.1	MYCOBACTERIUM VIRUS FIONNBARTH, COMPLETE GENOME. [29-SEP-2017]	MYCOBACTERIUM	NC_018027.1	MYCOBACTERIUM CHUBUENSE NBB4, COMPLETE GENOME	MYCOBACTERIUM
-1.36096	JN848801.1	VIBRIO PHAGE VCY-PHI, COMPLETE GENOME. [26-MAY-2017]	VIBRIO	CP010811.1	VIBRIO CHOLERAE STRAIN 1154-74, COMPLETE GENOME	VIBRIO
-1.36175	JN871591.1	SALMONELLA PHAGE SPN19, COMPLETE GENOME. [26-MAY-2017]	SALMONELLA	CP007546.1	ENTEROBACTER ASBURIAE L1, COMPLETE GENOME	ENTEROBACTER
-1.36781	JN880423.1	SALISAETA ICOSAHEDRAL PHAGE 1, COMPLETE GENOME. [26-MAY-2017]	SALISAETA	NC_015738.1	EGGERTHELLA SP. YY7918 DNA, COMPLETE GENOME	EGGERTHELLA
-1.31807	JN882264.1	HALORUBRUM PLEOMORPHIC VIRUS 2, COMPLETE GENOME	HALORUBRUM	NC_021313.1	SALINARCHAEUM SP. HARCHT-BSK1, COMPLETE GENOME	SALINARCHAEUM
-1.36781	JN882265.1	HALORUBRUM PLEOMORPHIC VIRUS 3, COMPLETE GENOME	HALORUBRUM	NC_014729.1	HALOGEOMETRICUM BORINQUENSE DSM 11551, COMPLETE GENOME	HALOGEOMETRICUM
-1.31707	JN882266.1	HALORUBRUM PLEOMORPHIC VIRUS 6, COMPLETE GENOME	HALORUBRUM	CP011295.1	RHODOCOCCUS ERYTHROPOLIS STRAIN BG43, COMPLETE GENOME	RHODOCOCCUS
-1.32907	JN882267.1	HALOGEOMETRICUM PLEOMORPHIC VIRUS 1, COMPLETE GENOME	HALOGEOMETRICUM	NC_014729.1	HALOGEOMETRICUM BORINQUENSE DSM 11551, COMPLETE GENOME	HALOGEOMETRICUM
-1.38611	JN882284.1	CRONOBACTER PHAGE VB_CSAM_GAP31, COMPLETE GENOME. [25-AUG-2017]	CRONOBACTER	NC_020304.1	DESULFOCAPSA SULFEXIGENS DSM 10523, COMPLETE GENOME	DESULFOCAPSA
-1.34868	JN882285.1	CRONOBACTER PHAGE VB_CSAM_GAP32, COMPLETE GENOME. [25-AUG-2017]	CRONOBACTER	NC_017331.1	STAPHYLOCOCCUS AUREUS SUBSP. AUREUS TW20, COMPLETE GENOME	STAPHYLOCOCCUS
-1.37734	JN882286.1	CRONOBACTER PHAGE VB_CSAP_GAP52, COMPLETE GENOME. [25-AUG-2017]	CRONOBACTER	CP003241.1	VIBRIO SP. EJY3 CHROMOSOME 1, COMPLETE SEQUENCE	VIBRIO
-1.37737	JN882287.1	CRONOBACTER PHAGE VB_CSAM_GAP161, COMPLETE GENOME. [25-AUG-2017]	CRONOBACTER	NC_013132.1	CHITINOPHAGA PINENSIS DSM 2588, COMPLETE GENOME	CHITINOPHAGA
-1.39325	JN882298.1	ESCHERICHIA PHAGE PHIKT, COMPLETE GENOME. [26-MAY-2017]	ESCHERICHIA	NC_016641.1	PAENIBACILLUS TERRAE HPL-003, COMPLETE GENOME	PAENIBACILLUS
-1.3882	JN939331.1	BRUCELLA PHAGE TB, COMPLETE GENOME. [26-MAY-2017]	BRUCELLA	NC_016641.1	PAENIBACILLUS TERRAE HPL-003, COMPLETE GENOME	PAENIBACILLUS
-1.38787	JN939332.1	BRUCELLA PHAGE PR, COMPLETE GENOME. [26-MAY-2017]	BRUCELLA	NC_016641.1	PAENIBACILLUS TERRAE HPL-003, COMPLETE GENOME	PAENIBACILLUS
-1.28886	JN968479.1	HALOARCULA HISPANICA ICOSAHEDRAL VIRUS 2, COMPLETE GENOME	HALOARCULA	NC_013967.1	HALOFERAX VOLCANII DS2, COMPLETE GENOME	HALOFERAX
-1.37278	JN984867.1	SHIGELLA PHAGE EP23, COMPLETE GENOME. [25-AUG-2017]	SHIGELLA	CP010283.1	SALMONELLA ENTERICA SUBSP. ENTERICA SEROVAR NEWPORT STR. CVM 21550, COMPLETE GENOME	SALMONELLA
-1.38686	JN986844.1	ENTEROBACTERIA PHAGE VB_ECOP_ACG-C91, COMPLETE GENOME. [26-MAY-2017]	ENTEROBACTERIA	CP002122.1	PREVOTELLA MELANINOGENICA ATCC 25845 CHROMOSOME I, COMPLETE SEQUENCE	PREVOTELLA
-1.37944	JN986845.1	ENTEROBACTERIA PHAGE VB_ECOS_ACG-M12, COMPLETE GENOME. [25-AUG-2017]	ENTEROBACTERIA	CP009281.1	PAENIBACILLUS SP. FSL R5-0345, COMPLETE GENOME	PAENIBACILLUS
-1.34323	JN986846.1	ENTEROBACTERIA PHAGE VB_ECOM_ACG-C40, COMPLETE GENOME. [25-AUG-2017]	ENTEROBACTERIA	CP007447.1	STAPHYLOCOCCUS AUREUS STRAIN XN108, COMPLETE GENOME	STAPHYLOCOCCUS
-1.35276	JN991020.1	PSEUDOMONAS PHAGE BF7, COMPLETE GENOME. [26-MAY-2017]	PSEUDOMONAS	NC_007005.1	PSEUDOMONAS SYRINGAE PV. SYRINGAE B728A CHROMOSOME, COMPLETE GENOME	PSEUDOMONAS
-1.39133	JQ007353.1	SALMONELLA PHAGE SE2, COMPLETE GENOME. [25-AUG-2017]	SALMONELLA	NC_011740.1	ESCHERICHIA FERGUSONII ATCC 35469 CHROMOSOME, COMPLETE GENOME	ESCHERICHIA
-1.37666	JQ010983.1	THERMOCOCCUS PRIEURII VIRUS 1, COMPLETE GENOME	THERMOCOCCUS	NC_012804.1	THERMOCOCCUS GAMMATOLERANS EJ3, COMPLETE GENOME	THERMOCOCCUS
-1.33896	JQ011318.1	ESCHERICHIA PHAGE TL-2011C, COMPLETE GENOME. [26-MAY-2017]	ESCHERICHIA	HF572917.2	ESCHERICHIA COLI HUSEC2011 COMPLETE GENOME	ESCHERICHIA
-1.39151	JQ015307.1	PECTOBACTERIUM PHAGE PHITE, COMPLETE GENOME. [25-AUG-2017]	PECTOBACTERIUM	NC_016641.1	PAENIBACILLUS TERRAE HPL-003, COMPLETE GENOME	PAENIBACILLUS
-1.38245	JQ031132.1	ENTEROBACTERIA PHAGE VB_ECOM-FV3, COMPLETE GENOME. [25-AUG-2017]	ENTEROBACTERIA	CP009279.1	PAENIBACILLUS SP. FSL H7-0737, COMPLETE GENOME	PAENIBACILLUS
-1.30329	JQ062992.1	BACILLUS PHAGE PHIS3501, COMPLETE GENOME. [25-AUG-2017]	BACILLUS	CP009351.1	BACILLUS THURINGIENSIS HD1002, COMPLETE GENOME	BACILLUS
-1.30948	JQ067087.2	PSEUDOMONAS PHAGE PAMX11, COMPLETE GENOME	PSEUDOMONAS	NC_014623.1	STIGMATELLA AURANTIACA DW4/3-1, COMPLETE GENOME	STIGMATELLA
-1.35711	JQ067092.2	PSEUDOMONAS PHAGE PAMX42, COMPLETE GENOME	PSEUDOMONAS	NC_015717.1	HYPHOMICROBIUM SP. MC1 CHROMOSOME, COMPLETE GENOME	HYPHOMICROBIUM
-1.36728	JQ086369.1	ENTEROBACTERIA PHAGE HK106, COMPLETE GENOME. [25-AUG-2017]	ENTEROBACTERIA	NC_002695.1	ESCHERICHIA COLI O157:H7 STR. SAKAI, COMPLETE GENOME	ESCHERICHIA
-1.36781	JQ086370.1	ENTEROBACTERIA PHAGE HK140, COMPLETE GENOME. [25-AUG-2017]	ENTEROBACTERIA	NC_011993.1	ESCHERICHIA COLI LF82 CHROMOSOME, COMPLETE SEQUENCE	ESCHERICHIA
-1.3643	JQ086371.1	ENTEROBACTERIA PHAGE HK225, COMPLETE GENOME. [26-MAY-2017]	ENTEROBACTERIA	NC_010473.1	ESCHERICHIA COLI STR. K12 SUBSTR. DH10B, COMPLETE GENOME	ESCHERICHIA
-1.36553	JQ086372.1	ENTEROBACTERIA PHAGE HK446, COMPLETE GENOME. [25-AUG-2017]	ENTEROBACTERIA	NC_017656.1	ESCHERICHIA COLI O55:H7 STR. RM12579, COMPLETE GENOME	ESCHERICHIA
-1.36577	JQ086373.1	ENTEROBACTERIA PHAGE HK542, COMPLETE GENOME. [25-AUG-2017]	ENTEROBACTERIA	NC_016902.1	ESCHERICHIA COLI KO11, COMPLETE GENOME	ESCHERICHIA
-1.36506	JQ086374.1	ENTEROBACTERIA PHAGE HK544, COMPLETE GENOME. [25-AUG-2017]	ENTEROBACTERIA	NC_017634.1	ESCHERICHIA COLI O83:H1 STR. NRG 857C CHROMOSOME, COMPLETE GENOME	ESCHERICHIA
-1.37581	JQ086375.1	ENTEROBACTERIA PHAGE HK578, COMPLETE GENOME. [25-AUG-2017]	ENTEROBACTERIA	NC_021844.1	SALMONELLA ENTERICA SUBSP. ENTERICA SEROVAR BAREILLY STR. CFSAN000189, COMPLETE GENOME	SALMONELLA
-1.33694	JQ086376.1	ENTEROBACTERIA PHAGE HK630, COMPLETE GENOME. [26-MAY-2017]	ENTEROBACTERIA	NC_013941.1	ESCHERICHIA COLI O55:H7 STR. CB9615, COMPLETE GENOME	ESCHERICHIA
-1.36636	JQ086377.1	ENTEROBACTERIA PHAGE HK633, COMPLETE GENOME. [25-AUG-2017]	ENTEROBACTERIA	CP005998.1	ESCHERICHIA COLI B7A, COMPLETE GENOME	ESCHERICHIA
-1.36767	JQ177062.1	BDELLOVIBRIO PHAGE PHI1422, COMPLETE GENOME. [25-AUG-2017]	BDELLOVIBRIO	CP002190.1	BDELLOVIBRIO BACTERIOVORUS W, COMPLETE GENOME	BDELLOVIBRIO
-1.36959	JQ177063.1	AEROMONAS PHAGE VB_ASAM-56, COMPLETE GENOME. [25-AUG-2017]	AEROMONAS	CP007152.1	MARINOBACTER SALARIUS STRAIN R9SW1, COMPLETE GENOME	MARINOBACTER
-1.38756	JQ177064.1	VIBRIO PHAGE VB_VCHM-138, COMPLETE GENOME. [25-AUG-2017]	VIBRIO	NC_008228.1	PSEUDOALTEROMONAS ATLANTICA T6C, COMPLETE GENOME	PSEUDOALTEROMONAS
-1.36255	JQ177065.1	PECTOBACTERIUM PHAGE ZF40, COMPLETE GENOME. [26-MAY-2017]	PECTOBACTERIUM	CP009678.1	PECTOBACTERIUM CAROTOVORUM SUBSP. ODORIFERUM STRAIN BC S7, COMPLETE GENOME	PECTOBACTERIUM
-1.36607	JQ182726.1	ENTEROBACTERIA PHAGE MEPX2, COMPLETE GENOME. [25-AUG-2017]	ENTEROBACTERIA	NC_011601.1	ESCHERICHIA COLI 0127:H6 E2348/69 COMPLETE GENOME, STRAIN E2348/69	ESCHERICHIA
-1.3703	JQ182727.1	ENTEROBACTERIA PHAGE MEPX1, COMPLETE GENOME. [25-AUG-2017]	ENTEROBACTERIA	NC_016902.1	ESCHERICHIA COLI KO11, COMPLETE GENOME	ESCHERICHIA
-1.36856	JQ182729.1	ENTEROBACTERIAL PHAGE MEP390, COMPLETE GENOME. [25-AUG-2017]	ENTEROBACTERIAL	NC_017628.1	ESCHERICHIA COLI IHE3034, COMPLETE GENOME	ESCHERICHIA
-1.36462	JQ182730.1	ENTEROBACTERIA PHAGE MEP237, COMPLETE GENOME. [26-MAY-2017]	ENTEROBACTERIA	NC_010473.1	ESCHERICHIA COLI STR. K12 SUBSTR. DH10B, COMPLETE GENOME	ESCHERICHIA
-1.365	JQ182731.1	ENTEROBACTERIA PHAGE MEP235, COMPLETE GENOME. [26-MAY-2017]	ENTEROBACTERIA	NC_016902.1	ESCHERICHIA COLI KO11, COMPLETE GENOME	ESCHERICHIA
-1.36975	JQ182732.1	ENTEROBACTERIAL PHAGE MEP234, COMPLETE GENOME. [25-AUG-2017]	ENTEROBACTERIAL	NC_013361.1	ESCHERICHIA COLI O26:H11 STR. 11368 DNA, COMPLETE GENOME	ESCHERICHIA
-1.36549	JQ182733.1	ENTEROBACTERIAL PHAGE MEP213, COMPLETE GENOME. [26-MAY-2017]	ENTEROBACTERIAL	NC_017656.1	ESCHERICHIA COLI O55:H7 STR. RM12579, COMPLETE GENOME	ESCHERICHIA
-1.3618	JQ182734.1	ENTEROBACTERIA PHAGE MEP043 C-1, COMPLETE GENOME. [26-MAY-2017]	ENTEROBACTERIA	CP005998.1	ESCHERICHIA COLI B7A, COMPLETE GENOME	ESCHERICHIA
-1.34011	JQ182735.1	ENTEROBACTERIA PHAGE HK629, COMPLETE GENOME	ENTEROBACTERIA	NC_013361.1	ESCHERICHIA COLI O26:H11 STR. 11368 DNA, COMPLETE GENOME	ESCHERICHIA
-1.38032	JQ182736.1	ENTEROBACTERIA PHAGE VB_ECOS_ROGUE1, COMPLETE GENOME	ENTEROBACTERIA	NC_013166.1	KANGIELLA KOREENSIS DSM 16069, COMPLETE GENOME	KANGIELLA
-1.37469	JQ245707.1	CYANOPHAGE S-TIM5, COMPLETE GENOME. [25-AUG-2017]	CYANOPHAGE	NC_010001.1	LACHNOCLOSTRIDIUM PHYTOFERMENTANS ISDG, COMPLETE GENOME	LACHNOCLOSTRIDIUM
-1.34834	JQ246028.1	CLOSTRIDIUM PHAGE PHI8074-B1, COMPLETE GENOME. [25-AUG-2017]	CLOSTRIDIUM	NC_018664.1	GOTTSCHALKIA ACIDURICI 9A, COMPLETE GENOME	GOTTSCHALKIA
-1.34599	JQ287645.1	SULFOLOBUS VIRUS STSV2, COMPLETE GENOME	SULFOLOBUS	NC_003106.2	SULFOLOBUS TOKODAII STR. 7 DNA, COMPLETE GENOME	SULFOLOBUS
-1.36219	JQ288021.1	SALMONELLA PHAGE SPN3UB, COMPLETE GENOME. [25-AUG-2017]	SALMONELLA	NC_011094.1	SALMONELLA ENTERICA SUBSP. ENTERICA SEROVAR SCHWARZENGRUND STR. CVM19633, COMPLETE GENOME	SALMONELLA
-1.34177	JQ300538.1	MYCOBACTERIUM PHAGE SPARTACUS, COMPLETE GENOME. [25-AUG-2017]	MYCOBACTERIUM	AP014547.1	MYCOBACTERIUM ABSCESSUS SUBSP. BOLLETII CCUG 48898 = JCM 15300 DNA, COMPLETE GENOME	MYCOBACTERIUM
-1.3383	JQ307386.1	PSEUDOMONAS PHAGE VB_PAE-TBILISIM32, COMPLETE GENOME. [26-MAY-2017]	PSEUDOMONAS	NC_022738.1	PSEUDOMONAS SP. VLB120, COMPLETE GENOME	PSEUDOMONAS
-1.35904	JQ307387.1	PSEUDOMONAS PHAGE VB_PAE-KAKHETI25, COMPLETE GENOME. [26-MAY-2017]	PSEUDOMONAS	NC_015572.1	METHYLOMONAS METHANICA MC09, COMPLETE GENOME	METHYLOMONAS
-1.32389	JQ309827.1	ENTEROCOCCUS PHAGE VB_EFAE230P-4, COMPLETE GENOME. [11-NOV-2016]	ENTEROCOCCUS	AP014583.1	WINOGRADSKYELLA SP. PG-2 DNA, COMPLETE GENOME	WINOGRADSKYELLA
-1.36533	JQ312117.1	AGROBACTERIUM PHAGE 7-7-1, COMPLETE GENOME. [25-AUG-2017]	AGROBACTERIUM	CP000758.1	OCHROBACTRUM ANTHROPI ATCC 49188 CHROMOSOME 1, COMPLETE SEQUENCE	OCHROBACTRUM
-1.35105	JQ340088.1	HALOCYNTHIA PHAGE JM-2012, COMPLETE GENOME. [26-MAY-2017]	HALOCYNTHIA	CP010817.1	MYROIDES PROFUNDI STRAIN D25, COMPLETE GENOME	MYROIDES
-1.37583	JQ340389.1	VIBRIO PHAGE PVP-1, COMPLETE GENOME. [25-AUG-2017]	VIBRIO	CP010817.1	MYROIDES PROFUNDI STRAIN D25, COMPLETE GENOME	MYROIDES
-1.38371	JQ340774.1	ENTEROBACTER PHAGE ENC34, COMPLETE GENOME. [26-MAY-2017]	ENTEROBACTER	NC_017845.1	PECTOBACTERIUM SP. SCC3193, COMPLETE GENOME	PECTOBACTERIUM
-1.38888	JQ341413.1	WEISSELLA CIBARIA YS61 PHAGE PHIYS61, COMPLETE GENOME. [26-MAY-2017]	WEISSELLA	NC_017576.1	STREPTOCOCCUS GALLOLYTICUS SUBSP. GALLOLYTICUS ATCC 43143 DNA, COMPLETE GENOME	STREPTOCOCCUS
-1.33172	JQ362498.1	SPHINGOMONAS PHAGE PAU, COMPLETE GENOME. [26-MAY-2017]	SPHINGOMONAS	AP014583.1	WINOGRADSKYELLA SP. PG-2 DNA, COMPLETE GENOME	WINOGRADSKYELLA
-1.33917	JQ408219.1	RALSTONIA PHAGE RSS0, COMPLETE GENOME. [13-NOV-2015]	RALSTONIA	CP007444.1	DYELLA JIANGNINGENSIS STRAIN SBZ 3-12, COMPLETE GENOME	DYELLA
-1.39757	JQ446452.1	SALINIVIBRIO PHAGE CW02, COMPLETE GENOME. [26-MAY-2017]	SALINIVIBRIO	NC_019738.1	MICROCOLEUS SP. PCC 7113, COMPLETE GENOME	MICROCOLEUS
-1.32514	JQ513383.1	ENTEROBACTERIA PHAGE VB_KLEM-RAK2, COMPLETE GENOME. [25-AUG-2017]	ENTEROBACTERIA	NC_020291.1	CLOSTRIDIUM SACCHAROPERBUTYLACETONICUM N1-4(HMT), COMPLETE GENOME	CLOSTRIDIUM
-1.29354	JQ617284.1	HELICOBACTER PHAGE 1961P, COMPLETE GENOME. [26-MAY-2017]	HELICOBACTER	NC_017372.1	HELICOBACTER PYLORI INDIA7, COMPLETE GENOME	HELICOBACTER
-1.37885	JQ619704.1	BACILLUS PHAGE PBC1, COMPLETE GENOME. [26-MAY-2017]	BACILLUS	CP010976.1	PAENIBACILLUS SP. IHBB 10380, COMPLETE GENOME	PAENIBACILLUS
-1.35566	JQ659259.1	LEUCONOSTOC PHAGE LMD1, COMPLETE GENOME. [25-AUG-2017]	LEUCONOSTOC	NC_003910.7	COLWELLIA PSYCHRERYTHRAEA 34H, COMPLETE GENOME	COLWELLIA
-1.2526	JQ660954.1	CLOSTRIDIUM PHAGE PHIS63, COMPLETE GENOME. [25-AUG-2017]	CLOSTRIDIUM	NC_020291.1	CLOSTRIDIUM SACCHAROPERBUTYLACETONICUM N1-4(HMT), COMPLETE GENOME	CLOSTRIDIUM
-1.30017	JQ686190.1	STAPHYLOCOCCUS PHAGE GH15, COMPLETE GENOME. [25-AUG-2017]	STAPHYLOCOCCUS	FN665652.1	CLOSTRIDIUM DIFFICILE COMPLETE GENOME, STRAIN CF5	CLOSTRIDIUM
-1.36847	JQ691610.1	SALMONELLA PHAGE SPN9TCW, COMPLETE GENOME. [26-MAY-2017]	SALMONELLA	NC_017641.1	ESCHERICHIA COLI UMNK88, COMPLETE GENOME	ESCHERICHIA
-1.39004	JQ691611.1	CRONOBACTER PHAGE CR9, COMPLETE GENOME. [25-AUG-2017]	CRONOBACTER	NC_016641.1	PAENIBACILLUS TERRAE HPL-003, COMPLETE GENOME	PAENIBACILLUS
-1.38909	JQ691612.1	CRONOBACTER PHAGE CR3, COMPLETE GENOME. [25-AUG-2017]	CRONOBACTER	NC_012881.1	DESULFOVIBRIO SALEXIGENS DSM 2638, COMPLETE GENOME	DESULFOVIBRIO
-1.35141	JQ729990.1	CLOSTRIDIUM PHAGE PHICP7R, COMPLETE GENOME. [27-MAY-2016]	CLOSTRIDIUM	CP007208.1	STAPHYLOCOCCUS XYLOSUS STRAIN HKUOPL8, COMPLETE GENOME	STAPHYLOCOCCUS
-1.34747	JQ729992.1	CLOSTRIDIUM PHAGE PHIZP2, COMPLETE GENOME. [27-MAY-2016]	CLOSTRIDIUM	CP007208.1	STAPHYLOCOCCUS XYLOSUS STRAIN HKUOPL8, COMPLETE GENOME	STAPHYLOCOCCUS
-1.33858	JQ740787.1	LACTOCOCCUS PHAGE ASCC191, COMPLETE GENOME. [25-AUG-2017]	LACTOCOCCUS	NC_015275.1	CLOSTRIDIUM LENTOCELLUM DSM 5427, COMPLETE GENOME	CLOSTRIDIUM
-1.34151	JQ740788.1	LACTOCOCCUS PHAGE ASCC273, COMPLETE GENOME. [25-AUG-2017]	LACTOCOCCUS	CP006837.1	LYSINIBACILLUS VARIANS STRAIN GY32, COMPLETE GENOME	LYSINIBACILLUS
-1.34315	JQ740789.1	LACTOCOCCUS PHAGE ASCC281, COMPLETE GENOME. [25-AUG-2017]	LACTOCOCCUS	CP009054.1	LACTOCOCCUS LACTIS SUBSP. LACTIS NCDO 2118, COMPLETE GENOME	LACTOCOCCUS
-1.34221	JQ740790.1	LACTOCOCCUS PHAGE ASCC284, COMPLETE GENOME. [25-AUG-2017]	LACTOCOCCUS	NC_013656.1	LACTOCOCCUS LACTIS SUBSP. LACTIS KF147, COMPLETE GENOME	LACTOCOCCUS
-1.34146	JQ740791.1	LACTOCOCCUS PHAGE ASCC287, COMPLETE GENOME. [25-AUG-2017]	LACTOCOCCUS	CP006837.1	LYSINIBACILLUS VARIANS STRAIN GY32, COMPLETE GENOME	LYSINIBACILLUS
-1.34323	JQ740792.1	LACTOCOCCUS PHAGE ASCC310, COMPLETE GENOME. [25-AUG-2017]	LACTOCOCCUS	NC_013656.1	LACTOCOCCUS LACTIS SUBSP. LACTIS KF147, COMPLETE GENOME	LACTOCOCCUS
-1.3414	JQ740793.1	LACTOCOCCUS PHAGE ASCC324, COMPLETE GENOME. [25-AUG-2017]	LACTOCOCCUS	CP006837.1	LYSINIBACILLUS VARIANS STRAIN GY32, COMPLETE GENOME	LYSINIBACILLUS
-1.34137	JQ740794.1	LACTOCOCCUS PHAGE ASCC337, COMPLETE GENOME. [25-AUG-2017]	LACTOCOCCUS	CP006837.1	LYSINIBACILLUS VARIANS STRAIN GY32, COMPLETE GENOME	LYSINIBACILLUS
-1.34321	JQ740796.1	LACTOCOCCUS PHAGE ASCC358, COMPLETE GENOME. [25-AUG-2017]	LACTOCOCCUS	NC_013656.1	LACTOCOCCUS LACTIS SUBSP. LACTIS KF147, COMPLETE GENOME	LACTOCOCCUS
-1.34321	JQ740797.1	LACTOCOCCUS PHAGE ASCC365, COMPLETE GENOME. [25-AUG-2017]	LACTOCOCCUS	NC_013656.1	LACTOCOCCUS LACTIS SUBSP. LACTIS KF147, COMPLETE GENOME	LACTOCOCCUS
-1.3414	JQ740798.1	LACTOCOCCUS PHAGE ASCC368, COMPLETE GENOME. [25-AUG-2017]	LACTOCOCCUS	CP006837.1	LYSINIBACILLUS VARIANS STRAIN GY32, COMPLETE GENOME	LYSINIBACILLUS
-1.34104	JQ740799.1	LACTOCOCCUS PHAGE ASCC395, COMPLETE GENOME. [25-AUG-2017]	LACTOCOCCUS	CP006837.1	LYSINIBACILLUS VARIANS STRAIN GY32, COMPLETE GENOME	LYSINIBACILLUS
-1.34104	JQ740801.1	LACTOCOCCUS PHAGE ASCC406, COMPLETE GENOME. [25-AUG-2017]	LACTOCOCCUS	CP006837.1	LYSINIBACILLUS VARIANS STRAIN GY32, COMPLETE GENOME	LYSINIBACILLUS
-1.34157	JQ740802.1	LACTOCOCCUS PHAGE ASCC454, COMPLETE GENOME. [25-AUG-2017]	LACTOCOCCUS	CP006837.1	LYSINIBACILLUS VARIANS STRAIN GY32, COMPLETE GENOME	LYSINIBACILLUS
-1.34073	JQ740803.1	LACTOCOCCUS PHAGE ASCC460, COMPLETE GENOME. [25-AUG-2017]	LACTOCOCCUS	CP006837.1	LYSINIBACILLUS VARIANS STRAIN GY32, COMPLETE GENOME	LYSINIBACILLUS
-1.34362	JQ740804.1	LACTOCOCCUS PHAGE ASCC465, COMPLETE GENOME. [25-AUG-2017]	LACTOCOCCUS	CP006837.1	LYSINIBACILLUS VARIANS STRAIN GY32, COMPLETE GENOME	LYSINIBACILLUS
-1.34065	JQ740806.1	LACTOCOCCUS PHAGE ASCC476, COMPLETE GENOME. [25-AUG-2017]	LACTOCOCCUS	CP006837.1	LYSINIBACILLUS VARIANS STRAIN GY32, COMPLETE GENOME	LYSINIBACILLUS
-1.34129	JQ740809.1	LACTOCOCCUS PHAGE ASCC502, COMPLETE GENOME. [25-AUG-2017]	LACTOCOCCUS	CP006837.1	LYSINIBACILLUS VARIANS STRAIN GY32, COMPLETE GENOME	LYSINIBACILLUS
-1.34076	JQ740810.1	LACTOCOCCUS PHAGE ASCC506, COMPLETE GENOME. [25-AUG-2017]	LACTOCOCCUS	CP006837.1	LYSINIBACILLUS VARIANS STRAIN GY32, COMPLETE GENOME	LYSINIBACILLUS
-1.34117	JQ740811.1	LACTOCOCCUS PHAGE ASCC527, COMPLETE GENOME. [25-AUG-2017]	LACTOCOCCUS	CP006837.1	LYSINIBACILLUS VARIANS STRAIN GY32, COMPLETE GENOME	LYSINIBACILLUS
-1.30013	JQ762257.1	PSEUDOMONAS PHAGE MP42, COMPLETE GENOME. [26-MAY-2017]	PSEUDOMONAS	CP011317.1	PSEUDOMONAS AERUGINOSA STRAIN CARB01 63, COMPLETE GENOME	PSEUDOMONAS
-1.36905	JQ768459.1	PSEUDOMONAS PHAGE LU11, COMPLETE GENOME. [25-AUG-2017]	PSEUDOMONAS	NC_012997.1	TEREDINIBACTER TURNERAE T7901, COMPLETE GENOME	TEREDINIBACTER
-1.29202	JQ779023.1	STAPHYLOCOCCUS PHAGE SMSAP5, COMPLETE GENOME. [26-MAY-2017]	STAPHYLOCOCCUS	CP007176.1	STAPHYLOCOCCUS AUREUS USA300-ISMMS1, COMPLETE GENOME	STAPHYLOCOCCUS
-1.30283	JQ779024.1	STAPHYLOCOCCUS PHAGE TEM123, COMPLETE GENOME. [25-AUG-2017]	STAPHYLOCOCCUS	CP007176.1	STAPHYLOCOCCUS AUREUS USA300-ISMMS1, COMPLETE GENOME	STAPHYLOCOCCUS
-1.37499	JQ780163.1	VIBRIO PHAGE VP3, COMPLETE GENOME. [25-AUG-2017]	VIBRIO	CP002122.1	PREVOTELLA MELANINOGENICA ATCC 25845 CHROMOSOME I, COMPLETE SEQUENCE	PREVOTELLA
-1.32107	JQ780327.1	CRONOBACTER PHAGE PHIES15, COMPLETE SEQUENCE	CRONOBACTER	NC_017933.1	CRONOBACTER SAKAZAKII ES15, COMPLETE GENOME	CRONOBACTER
-1.34691	JQ797329.1	LISTERIA PHAGE VB_LMOM_AG20, COMPLETE GENOME. [25-AUG-2017]	LISTERIA	CP010817.1	MYROIDES PROFUNDI STRAIN D25, COMPLETE GENOME	MYROIDES
-1.3738	JQ801337.1	VIBRIO PHAGE VVAW1, COMPLETE GENOME. [26-MAY-2017]	VIBRIO	CP007044.2	CHANIA MULTITUDINISENTENS RB-25, COMPLETE GENOME	CHANIA
-1.37162	JQ806763.1	SALMONELLA PHAGE VB_SEMP_EMEK, COMPLETE GENOME. [25-AUG-2017]	SALMONELLA	NC_016854.1	SALMONELLA ENTERICA SUBSP. ENTERICA SEROVAR TYPHIMURIUM STR. D23580 COMPLETE GENOME	SALMONELLA
-1.38717	JQ809650.1	CELERIBACTER PHAGE P12053L, COMPLETE GENOME. [26-MAY-2017]	CELERIBACTER	CP002122.1	PREVOTELLA MELANINOGENICA ATCC 25845 CHROMOSOME I, COMPLETE SEQUENCE	PREVOTELLA
-1.28915	JQ809663.1	STENOTROPHOMONAS PHAGE SMP131, COMPLETE GENOME. [25-AUG-2017]	STENOTROPHOMONAS	NC_017671.1	STENOTROPHOMONAS MALTOPHILIA D457 COMPLETE GENOME	STENOTROPHOMONAS
-1.34638	JQ809702.1	MYCOBACTERIUM PHAGE AVANI, COMPLETE GENOME. [26-MAY-2017]	MYCOBACTERIUM	NC_015564.1	HOYOSELLA SUBFLAVA DQS3-9A1, COMPLETE GENOME	HOYOSELLA
-1.3259	JQ809703.1	MYCOBACTERIUM PHAGE AENEAS, COMPLETE GENOME. [25-AUG-2017]	MYCOBACTERIUM	NC_016604.1	MYCOBACTERIUM RHODESIAE NBB3, COMPLETE GENOME	MYCOBACTERIUM
-1.34404	JQ823122.1	PERSICIVIRGA PHAGE P12024S, COMPLETE GENOME. [25-AUG-2017]	PERSICIVIRGA	NC_014934.1	CELLULOPHAGA ALGICOLA DSM 14237, COMPLETE GENOME	CELLULOPHAGA
-1.34741	JQ823123.1	PERSICIVIRGA PHAGE P12024L, COMPLETE GENOME. [25-AUG-2017]	PERSICIVIRGA	NC_014934.1	CELLULOPHAGA ALGICOLA DSM 14237, COMPLETE GENOME	CELLULOPHAGA
-1.3965	JQ837901.1	PECTOBACTERIUM PHAGE PP1, COMPLETE GENOME. [26-MAY-2017]	PECTOBACTERIUM	FM954972.2	VIBRIO SPLENDIDUS LGP32 CHROMOSOME 1	VIBRIO
-1.35804	JQ867099.1	CROCEIBACTER PHAGE P2559S, COMPLETE GENOME. [26-MAY-2017]	CROCEIBACTER	NC_007912.1	SACCHAROPHAGUS DEGRADANS 2-40, COMPLETE GENOME	SACCHAROPHAGUS
-1.37991	JQ867100.1	MARINOMONAS PHAGE P12026, COMPLETE GENOME. [25-AUG-2017]	MARINOMONAS	NC_015276.1	MARINOMONAS MEDITERRANEA MMB-1, COMPLETE GENOME	MARINOMONAS
-1.29683	JQ911768.1	MYCOBACTERIUM PHAGE AVA3, COMPLETE GENOME. [25-AUG-2017]	MYCOBACTERIUM	CP009914.1	MYCOBACTERIUM SP. VKM AC-1817D, COMPLETE GENOME	MYCOBACTERIUM
-1.29789	JQ957932.1	STAPHYLOCOCCUS PHAGE STAUST398-2, COMPLETE GENOME. [26-MAY-2017]	STAPHYLOCOCCUS	NC_009632.1	STAPHYLOCOCCUS AUREUS SUBSP. AUREUS JH1, COMPLETE GENOME	STAPHYLOCOCCUS
-1.37279	JQ965645.1	SALMONELLA PHAGE SSU5, COMPLETE GENOME. [25-AUG-2017]	SALMONELLA	NC_009436.1	ENTEROBACTER SP. 638, COMPLETE GENOME	ENTEROBACTER
-1.32488	JQ973847.1	STAPHYLOCOCCUS PHAGE STAUST398-3, COMPLETE GENOME. [25-AUG-2017]	STAPHYLOCOCCUS	NC_009641.1	STAPHYLOCOCCUS AUREUS SUBSP. AUREUS STR. NEWMAN DNA, COMPLETE GENOME	STAPHYLOCOCCUS
-1.31316	JX013863.1	STAPHYLOCOCCUS PHAGE STAUST398-1, COMPLETE GENOME. [26-MAY-2017]	STAPHYLOCOCCUS	NC_021670.1	STAPHYLOCOCCUS AUREUS BMB9393, COMPLETE GENOME	STAPHYLOCOCCUS
-1.30208	JX080300.2	STAPHYLOCOCCUS PHAGE STAPH1N, COMPLETE GENOME	STAPHYLOCOCCUS	FN665652.1	CLOSTRIDIUM DIFFICILE COMPLETE GENOME, STRAIN CF5	CLOSTRIDIUM
-1.30236	JX080301.2	STAPHYLOCOCCUS PHAGE A3R, COMPLETE GENOME	STAPHYLOCOCCUS	FN665652.1	CLOSTRIDIUM DIFFICILE COMPLETE GENOME, STRAIN CF5	CLOSTRIDIUM
-1.3019	JX080302.2	STAPHYLOCOCCUS PHAGE 676Z, COMPLETE GENOME	STAPHYLOCOCCUS	FN665652.1	CLOSTRIDIUM DIFFICILE COMPLETE GENOME, STRAIN CF5	CLOSTRIDIUM
-1.30164	JX080303.2	STAPHYLOCOCCUS PHAGE FI200W, COMPLETE GENOME	STAPHYLOCOCCUS	FN665652.1	CLOSTRIDIUM DIFFICILE COMPLETE GENOME, STRAIN CF5	CLOSTRIDIUM
-1.30062	JX080304.2	STAPHYLOCOCCUS PHAGE MSA6, COMPLETE GENOME	STAPHYLOCOCCUS	FN665652.1	CLOSTRIDIUM DIFFICILE COMPLETE GENOME, STRAIN CF5	CLOSTRIDIUM
-1.30209	JX080305.2	STAPHYLOCOCCUS PHAGE P4W, COMPLETE GENOME	STAPHYLOCOCCUS	FN665652.1	CLOSTRIDIUM DIFFICILE COMPLETE GENOME, STRAIN CF5	CLOSTRIDIUM
-1.37632	JX094431.1	BACILLUS CEREUS BACTERIOPHAGE VB_BCEM_BC431V3, COMPLETE GENOME. [25-AUG-2017]	BACILLUS	CP010327.1	MYROIDES SP. A21, COMPLETE GENOME	MYROIDES
-1.3868	JX094500.1	CRONOBACTER PHAGE CR5, COMPLETE GENOME	CRONOBACTER	NC_016902.1	ESCHERICHIA COLI KO11, COMPLETE GENOME	ESCHERICHIA
-1.30801	JX094501.1	STAPHYLOCOCCUS PHAGE SA13, COMPLETE GENOME	STAPHYLOCOCCUS	NC_009487.1	STAPHYLOCOCCUS AUREUS SUBSP. AUREUS JH9, COMPLETE GENOME	STAPHYLOCOCCUS
-1.26814	JX100809.1	CAULOBACTER PHAGE CCRSWIFT, COMPLETE GENOME. [25-AUG-2017]	CAULOBACTER	NC_014100.1	CAULOBACTER SEGNIS ATCC 21756, COMPLETE GENOME	CAULOBACTER
-1.32461	JX100810.1	CAULOBACTER PHAGE CCRCOLOSSUS, COMPLETE GENOME. [25-AUG-2017]	CAULOBACTER	CP010313.1	BRADYRHIZOBIUM JAPONICUM STRAIN E109, COMPLETE GENOME	BRADYRHIZOBIUM
-1.2682	JX100811.1	CAULOBACTER PHAGE CCRKARMA, COMPLETE GENOME. [25-AUG-2017]	CAULOBACTER	NC_014100.1	CAULOBACTER SEGNIS ATCC 21756, COMPLETE GENOME	CAULOBACTER
-1.26837	JX100812.1	CAULOBACTER PHAGE CCRMAGNETO, COMPLETE GENOME. [25-AUG-2017]	CAULOBACTER	NC_014100.1	CAULOBACTER SEGNIS ATCC 21756, COMPLETE GENOME	CAULOBACTER
-1.26896	JX100813.1	CAULOBACTER PHAGE PHICBK, COMPLETE GENOME. [25-AUG-2017]	CAULOBACTER	NC_014100.1	CAULOBACTER SEGNIS ATCC 21756, COMPLETE GENOME	CAULOBACTER
-1.26643	JX100814.1	CAULOBACTER PHAGE CCRROGUE, COMPLETE GENOME. [25-AUG-2017]	CAULOBACTER	NC_014100.1	CAULOBACTER SEGNIS ATCC 21756, COMPLETE GENOME	CAULOBACTER
-1.27885	JX104231.1	BURKHOLDERIA PHAGE BCEPMIGL, COMPLETE GENOME. [26-MAY-2017]	BURKHOLDERIA	NC_020516.1	AZOARCUS SP. KH32C DNA, COMPLETE GENOME	AZOARCUS
-1.32757	JX120799.2	LISTERIA PHAGE LP-030-2, COMPLETE GENOME	LISTERIA	NC_021829.2	LISTERIA MONOCYTOGENES J1-220, COMPLETE GENOME	LISTERIA
-1.33848	JX121091.1	MYCOBACTERIOPHAGE TAJ, COMPLETE GENOME. [26-MAY-2017]	MYCOBACTERIUM	AP014547.1	MYCOBACTERIUM ABSCESSUS SUBSP. BOLLETII CCUG 48898 = JCM 15300 DNA, COMPLETE GENOME	MYCOBACTERIUM
-1.36593	JX123262.1	AEROMONAS PHAGE CC2, COMPLETE GENOME. [25-AUG-2017]	AEROMONAS	CP009278.1	SPHINGOBACTERIUM SP. ML3W, COMPLETE GENOME	SPHINGOBACTERIUM
-1.34668	JX126918.2	LISTERIA PHAGE LP-125, COMPLETE GENOME. [25-AUG-2017]	LISTERIA	NC_015275.1	CLOSTRIDIUM LENTOCELLUM DSM 5427, COMPLETE GENOME	CLOSTRIDIUM
-1.34638	JX126919.1	LISTERIA PHAGE LP-110, COMPLETE GENOME. [25-AUG-2017]	LISTERIA	NC_010001.1	LACHNOCLOSTRIDIUM PHYTOFERMENTANS ISDG, COMPLETE GENOME	LACHNOCLOSTRIDIUM
-1.34767	JX126920.2	LISTERIA PHAGE LP-037, COMPLETE GENOME. [25-AUG-2017]	LISTERIA	NC_010001.1	LACHNOCLOSTRIDIUM PHYTOFERMENTANS ISDG, COMPLETE GENOME	LACHNOCLOSTRIDIUM
-1.38398	JX128257.1	ESCHERICHIA PHAGE ECML-4, COMPLETE GENOME. [25-AUG-2017]	ESCHERICHIA	CP009281.1	PAENIBACILLUS SP. FSL R5-0345, COMPLETE GENOME	PAENIBACILLUS
-1.38011	JX128258.1	ESCHERICHIA PHAGE ECML-117, COMPLETE GENOME. [25-AUG-2017]	ESCHERICHIA	NC_015276.1	MARINOMONAS MEDITERRANEA MMB-1, COMPLETE GENOME	MARINOMONAS
-1.34491	JX128259.1	ESCHERICHIA PHAGE ECML-134, COMPLETE GENOME. [25-AUG-2017]	ESCHERICHIA	NC_018500.1	BACILLUS THURINGIENSIS HD-771, COMPLETE GENOME	BACILLUS
-1.31492	JX131330.1	PSEUDOMONAS PHAGE MP1412, COMPLETE GENOME. [26-MAY-2017]	PSEUDOMONAS	NC_014623.1	STIGMATELLA AURANTIACA DW4/3-1, COMPLETE GENOME	STIGMATELLA
-1.27652	JX145341.1	CLOSTRIDIUM PHAGE PHIMMP02, COMPLETE GENOME. [25-AUG-2017]	CLOSTRIDIUM	NC_009089.1	CLOSTRIDIOIDES DIFFICILE 630, COMPLETE GENOME	CLOSTRIDIOIDES
-1.28878	JX145342.1	CLOSTRIDIUM PHAGE PHIMMP04, COMPLETE GENOME. [25-AUG-2017]	CLOSTRIDIUM	NC_009089.1	CLOSTRIDIOIDES DIFFICILE 630, COMPLETE GENOME	CLOSTRIDIOIDES
-1.26861	JX163858.1	CAULOBACTER PHAGE PHICBK, COMPLETE GENOME. [25-AUG-2017]	CAULOBACTER	NC_014100.1	CAULOBACTER SEGNIS ATCC 21756, COMPLETE GENOME	CAULOBACTER
-1.37269	JX173487.1	PSEUDOMONAS PHAGE PHI-S1, COMPLETE GENOME. [25-AUG-2017]	PSEUDOMONAS	CP007152.1	MARINOBACTER SALARIUS STRAIN R9SW1, COMPLETE GENOME	MARINOBACTER
-1.29881	JX174275.1	STAPHYLOCOCCUS PHAGE LH1, COMPLETE GENOME. [26-MAY-2017]	STAPHYLOCOCCUS	NC_009632.1	STAPHYLOCOCCUS AUREUS SUBSP. AUREUS JH1, COMPLETE GENOME	STAPHYLOCOCCUS
-1.36735	JX181822.1	SALMONELLA PHAGE SPT-1, PARTIAL GENOME	SALMONELLA	NC_015558.1	STREPTOCOCCUS PARAUBERIS KCTC 11537, COMPLETE GENOME	STREPTOCOCCUS
-1.38198	JX181824.1	SALMONELLA PHAGE SSE-121, COMPLETE GENOME. [25-AUG-2017]	SALMONELLA	NC_020304.1	DESULFOCAPSA SULFEXIGENS DSM 10523, COMPLETE GENOME	DESULFOCAPSA
-1.35545	JX181825.1	SALMONELLA PHAGE STML-198, COMPLETE GENOME. [25-AUG-2017]	SALMONELLA	NC_017770.1	SOLITALEA CANADENSIS DSM 3403, COMPLETE GENOME	SOLITALEA
-1.38569	JX181829.1	SALMONELLA PHAGE SKML-39, COMPLETE GENOME. [25-AUG-2017]	SALMONELLA	CP007152.1	MARINOBACTER SALARIUS STRAIN R9SW1, COMPLETE GENOME	MARINOBACTER
-1.26735	JX182369.1	STREPTOMYCES PHAGE PHIHAU3, COMPLETE GENOME. [26-MAY-2017]	STREPTOMYCES	NC_003155.5	STREPTOMYCES AVERMITILIS MA-4680 = NBRC 14893 DNA, COMPLETE GENOME	STREPTOMYCES
-1.27883	JX182370.1	STREPTOMYCES PHAGE R4, COMPLETE GENOME. [26-MAY-2017]	STREPTOMYCES	NC_003155.5	STREPTOMYCES AVERMITILIS MA-4680 = NBRC 14893 DNA, COMPLETE GENOME	STREPTOMYCES
-1.22763	JX182371.1	STREPTOMYCES PHAGE SV1, COMPLETE GENOME. [26-MAY-2017]	STREPTOMYCES	NC_013929.1	STREPTOMYCES SCABIEI 87.22 COMPLETE GENOME	STREPTOMYCES
-1.32966	JX182372.1	STREPTOMYCES PHAGE TG1, COMPLETE GENOME. [25-AUG-2017]	STREPTOMYCES	NC_015564.1	HOYOSELLA SUBFLAVA DQS3-9A1, COMPLETE GENOME	HOYOSELLA
-1.33499	JX193904.1	ENTEROCOCCUS PHAGE EFACPT1, COMPLETE GENOME. [25-AUG-2017]	ENTEROCOCCUS	CP007208.1	STAPHYLOCOCCUS XYLOSUS STRAIN HKUOPL8, COMPLETE GENOME	STAPHYLOCOCCUS
-1.30503	JX194239.1	STAPHYLOCOCCUS PHAGE SA11, COMPLETE GENOME. [25-AUG-2017]	STAPHYLOCOCCUS	NC_014393.1	CLOSTRIDIUM CELLULOVORANS 743B, COMPLETE GENOME	CLOSTRIDIUM
-1.38084	JX195166.1	PECTOBACTERIUM PHAGE MY1, COMPLETE GENOME. [25-AUG-2017]	PECTOBACTERIUM	CP010817.1	MYROIDES PROFUNDI STRAIN D25, COMPLETE GENOME	MYROIDES
-1.39137	JX202565.1	SALMONELLA PHAGE WKSL3, COMPLETE GENOME. [25-AUG-2017]	SALMONELLA	NC_006511.1	SALMONELLA ENTERICA SUBSP. ENTERICA SEROVAR PARATYPHI A STR. ATCC 9150, COMPLETE GENOME	SALMONELLA
-1.38143	JX238501.3	BACILLUS PHAGE PHIAGATE, COMPLETE GENOME. [25-AUG-2017]	BACILLUS	CP010976.1	PAENIBACILLUS SP. IHBB 10380, COMPLETE GENOME	PAENIBACILLUS
-1.37616	JX262215.1	PROPIONIBACTERIUM PHAGE P9.1, COMPLETE GENOME. [26-MAY-2017]	PROPIONIBACTERIUM	NC_013174.1	JONESIA DENITRIFICANS DSM 20603, COMPLETE GENOME	JONESIA
-1.37407	JX262216.1	PROPIONIBACTERIUM PHAGE P14.4, COMPLETE GENOME. [26-MAY-2017]	PROPIONIBACTERIUM	NC_022198.1	CORYNEBACTERIUM ARGENTORATENSE DSM 44202, COMPLETE GENOME	CORYNEBACTERIUM
-1.37579	JX262217.1	PROPIONIBACTERIUM PHAGE P101A, COMPLETE GENOME. [26-MAY-2017]	PROPIONIBACTERIUM	NC_022198.1	CORYNEBACTERIUM ARGENTORATENSE DSM 44202, COMPLETE GENOME	CORYNEBACTERIUM
-1.37643	JX262218.1	PROPIONIBACTERIUM PHAGE P104A, COMPLETE GENOME. [26-MAY-2017]	PROPIONIBACTERIUM	NC_013174.1	JONESIA DENITRIFICANS DSM 20603, COMPLETE GENOME	JONESIA
-1.37775	JX262219.1	PROPIONIBACTERIUM PHAGE P105, COMPLETE GENOME. [26-MAY-2017]	PROPIONIBACTERIUM	NC_022198.1	CORYNEBACTERIUM ARGENTORATENSE DSM 44202, COMPLETE GENOME	CORYNEBACTERIUM
-1.37777	JX262220.1	PROPIONIBACTERIUM PHAGE P100D, COMPLETE GENOME. [26-MAY-2017]	PROPIONIBACTERIUM	NC_022198.1	CORYNEBACTERIUM ARGENTORATENSE DSM 44202, COMPLETE GENOME	CORYNEBACTERIUM
-1.37601	JX262221.1	PROPIONIBACTERIUM PHAGE P100_A, COMPLETE GENOME. [26-MAY-2017]	PROPIONIBACTERIUM	NC_022198.1	CORYNEBACTERIUM ARGENTORATENSE DSM 44202, COMPLETE GENOME	CORYNEBACTERIUM
-1.3775	JX262222.1	PROPIONIBACTERIUM PHAGE P100_1, COMPLETE GENOME. [26-MAY-2017]	PROPIONIBACTERIUM	NC_022198.1	CORYNEBACTERIUM ARGENTORATENSE DSM 44202, COMPLETE GENOME	CORYNEBACTERIUM
-1.37445	JX262223.1	PROPIONIBACTERIUM PHAGE P1.1, COMPLETE GENOME. [26-MAY-2017]	PROPIONIBACTERIUM	NC_022198.1	CORYNEBACTERIUM ARGENTORATENSE DSM 44202, COMPLETE GENOME	CORYNEBACTERIUM
-1.37791	JX262224.1	PROPIONIBACTERIUM PHAGE ATCC29399B_T, COMPLETE GENOME. [26-MAY-2017]	PROPIONIBACTERIUM	NC_013174.1	JONESIA DENITRIFICANS DSM 20603, COMPLETE GENOME	JONESIA
-1.30692	JX274646.1	STAPHYLOCOCCUS PHAGE SP5, COMPLETE GENOME. [25-AUG-2017]	STAPHYLOCOCCUS	NC_009487.1	STAPHYLOCOCCUS AUREUS SUBSP. AUREUS JH9, COMPLETE GENOME	STAPHYLOCOCCUS
-1.30799	JX274647.1	STAPHYLOCOCCUS PHAGE SP6, COMPLETE GENOME. [25-AUG-2017]	STAPHYLOCOCCUS	NC_009487.1	STAPHYLOCOCCUS AUREUS SUBSP. AUREUS JH9, COMPLETE GENOME	STAPHYLOCOCCUS
-1.38804	JX296113.1	PROVIDENCIA PHAGE REDJAC, COMPLETE GENOME. [26-MAY-2017]	PROVIDENCIA	CP009706.1	HAFNIA ALVEI FB1, COMPLETE GENOME	HAFNIA
-1.37253	JX306041.1	STENOTROPHOMONAS PHAGE IME13, COMPLETE GENOME. [25-AUG-2017]	STENOTROPHOMONAS	NC_015321.1	FLUVIICOLA TAFFENSIS DSM 16823, COMPLETE GENOME	FLUVIICOLA
-1.38322	JX316028.1	ERWINIA PHAGE PHIEAH2, COMPLETE GENOME. [26-MAY-2017]	ERWINIA	NC_015968.1	ENTEROBACTER ASBURIAE LF7A, COMPLETE GENOME	ENTEROBACTER
-1.32065	JX403940.1	ACINETOBACTER PHAGE YMC/09/02/B1251_ABA_BP, COMPLETE GENOME. [25-AUG-2017]	ACINETOBACTER	AP013357.1	ACINETOBACTER BAUMANNII NCGM 237 DNA, COMPLETE GENOME	ACINETOBACTER
-1.37972	JX415535.1	ESCHERICHIA PHAGE ECBP1, COMPLETE GENOME. [25-AUG-2017]	ESCHERICHIA	CP009279.1	PAENIBACILLUS SP. FSL H7-0737, COMPLETE GENOME	PAENIBACILLUS
-1.3769	JX415536.1	ESCHERICHIA PHAGE ECBP2, COMPLETE GENOME. [25-AUG-2017]	ESCHERICHIA	CP009279.1	PAENIBACILLUS SP. FSL H7-0737, COMPLETE GENOME	PAENIBACILLUS
-1.39919	JX421753.1	ENTEROBACTERIA PHAGE T7M, COMPLETE GENOME. [25-AUG-2017]	ENTEROBACTERIA	CP003241.1	VIBRIO SP. EJY3 CHROMOSOME 1, COMPLETE SEQUENCE	VIBRIO
-1.29663	JX434030.1	PSEUDOMONAS PHAGE JBD5, COMPLETE GENOME. [25-AUG-2017]	PSEUDOMONAS	NC_011770.1	PSEUDOMONAS AERUGINOSA LESB58 COMPLETE GENOME SEQUENCE	PSEUDOMONAS
-1.29816	JX434031.1	PSEUDOMONAS PHAGE JBD24, COMPLETE GENOME. [26-MAY-2017]	PSEUDOMONAS	CP011317.1	PSEUDOMONAS AERUGINOSA STRAIN CARB01 63, COMPLETE GENOME	PSEUDOMONAS
-1.3022	JX434032.1	PSEUDOMONAS PHAGE JBD30, COMPLETE GENOME	PSEUDOMONAS	CP011317.1	PSEUDOMONAS AERUGINOSA STRAIN CARB01 63, COMPLETE GENOME	PSEUDOMONAS
-1.34792	JX442241.1	LISTERIA PHAGE P70, COMPLETE GENOME. [25-AUG-2017]	LISTERIA	NC_010001.1	LACHNOCLOSTRIDIUM PHYTOFERMENTANS ISDG, COMPLETE GENOME	LACHNOCLOSTRIDIUM
-1.36356	JX483876.1	RHIZOBIUM PHAGE RHEPH04, COMPLETE GENOME. [25-AUG-2017]	RHIZOBIUM	NC_015717.1	HYPHOMICROBIUM SP. MC1 CHROMOSOME, COMPLETE GENOME	HYPHOMICROBIUM
-1.36308	JX483877.1	RHIZOBIUM PHAGE RHEPH05, COMPLETE GENOME. [25-AUG-2017]	RHIZOBIUM	NC_015717.1	HYPHOMICROBIUM SP. MC1 CHROMOSOME, COMPLETE GENOME	HYPHOMICROBIUM
-1.36331	JX483878.1	RHIZOBIUM PHAGE RHEPH06, COMPLETE GENOME. [25-AUG-2017]	RHIZOBIUM	NC_015717.1	HYPHOMICROBIUM SP. MC1 CHROMOSOME, COMPLETE GENOME	HYPHOMICROBIUM
-1.30595	JX483881.1	RHIZOBIUM PHAGE RHEPH10, COMPLETE GENOME. [25-AUG-2017]	RHIZOBIUM	NC_017249.1	BRADYRHIZOBIUM JAPONICUM USDA 6 DNA, COMPLETE GENOME	BRADYRHIZOBIUM
-1.38494	JX486087.1	LACTOBACILLUS PHAGE ATCC 8014-B1, COMPLETE GENOME. [25-AUG-2017]	LACTOBACILLUS	CP004406.1	LACTOBACILLUS PLANTARUM DOMLA, COMPLETE GENOME	LACTOBACILLUS
-1.287	JX495041.1	PSEUDOMONAS PHAGE JBD18, COMPLETE GENOME. [26-MAY-2017]	PSEUDOMONAS	AP014646.1	PSEUDOMONAS AERUGINOSA DNA, COMPLETE GENOME, STRAIN: NCGM 1984	PSEUDOMONAS
-1.30981	JX495042.1	PSEUDOMONAS PHAGE JBD25, COMPLETE GENOME. [26-MAY-2017]	PSEUDOMONAS	AP014646.1	PSEUDOMONAS AERUGINOSA DNA, COMPLETE GENOME, STRAIN: NCGM 1984	PSEUDOMONAS
-1.33797	JX501340.1	PSEUDOMONAS PHAGE MPK7, COMPLETE GENOME. [26-MAY-2017]	PSEUDOMONAS	NC_022738.1	PSEUDOMONAS SP. VLB120, COMPLETE GENOME	PSEUDOMONAS
-1.34527	JX509734.1	ENTEROBACTERIA PHAGE SFI, COMPLETE GENOME. [25-AUG-2017]	ENTEROBACTERIA	NC_020163.1	ESCHERICHIA COLI APEC O78, COMPLETE GENOME	ESCHERICHIA
-1.36084	JX536493.1	ENTEROBACTERIA PHAGE HX01, COMPLETE GENOME. [25-AUG-2017]	ENTEROBACTERIA	CP009278.1	SPHINGOBACTERIUM SP. ML3W, COMPLETE GENOME	SPHINGOBACTERIUM
-1.37712	JX556417.1	VIBRIO PHAGE VB_VPAM_MAR, COMPLETE GENOME. [25-AUG-2017]	VIBRIO	NC_008260.1	ALCANIVORAX BORKUMENSIS SK2, COMPLETE GENOME	ALCANIVORAX
-1.40152	JX556418.1	VIBRIO PHAGE VB_VPAS_MAR10, COMPLETE GENOME. [26-MAY-2017]	VIBRIO	CP003241.1	VIBRIO SP. EJY3 CHROMOSOME 1, COMPLETE SEQUENCE	VIBRIO
-1.35201	JX560521.1	ACINETOBACTER PHAGE PHIAC-1, COMPLETE GENOME. [25-AUG-2017]	ACINETOBACTER	NC_014259.1	ACINETOBACTER OLEIVORANS DR1, COMPLETE GENOME	ACINETOBACTER
-1.36687	JX560968.1	ESCHERICHIA PHAGE EC6, COMPLETE GENOME. [25-AUG-2017]	ESCHERICHIA	NC_010001.1	LACHNOCLOSTRIDIUM PHYTOFERMENTANS ISDG, COMPLETE GENOME	LACHNOCLOSTRIDIUM
-1.36599	JX561091.1	ESCHERICHIA PHAGE PHAPEC8, COMPLETE GENOME. [26-MAY-2017]	ESCHERICHIA	NC_017770.1	SOLITALEA CANADENSIS DSM 3403, COMPLETE GENOME	SOLITALEA
-1.33496	JX567312.1	LACTOCOCCUS PHAGE BM13, COMPLETE GENOME. [26-MAY-2017]	LACTOCOCCUS	NC_002662.1	LACTOCOCCUS LACTIS SUBSP. LACTIS IL1403 CHROMOSOME, COMPLETE GENOME	LACTOCOCCUS
-1.26376	JX569801.1	CAMPYLOBACTER PHAGE CP30A, COMPLETE GENOME. [25-AUG-2017]	CAMPYLOBACTER	CP009933.1	CLOSTRIDIUM SCATOLOGENES STRAIN ATCC 25775, COMPLETE GENOME	CLOSTRIDIUM
-1.37607	JX570702.1	PROPIONIBACTERIUM PHAGE PHL111M01, COMPLETE GENOME. [26-MAY-2017]	PROPIONIBACTERIUM	NC_022198.1	CORYNEBACTERIUM ARGENTORATENSE DSM 44202, COMPLETE GENOME	CORYNEBACTERIUM
-1.37746	JX570704.1	PROPIONIBACTERIUM PHAGE PHL010M04, COMPLETE GENOME. [26-MAY-2017]	PROPIONIBACTERIUM	NC_022198.1	CORYNEBACTERIUM ARGENTORATENSE DSM 44202, COMPLETE GENOME	CORYNEBACTERIUM
-1.37523	JX570705.1	PROPIONIBACTERIUM PHAGE PHL060L00, COMPLETE GENOME. [26-MAY-2017]	PROPIONIBACTERIUM	NC_022198.1	CORYNEBACTERIUM ARGENTORATENSE DSM 44202, COMPLETE GENOME	CORYNEBACTERIUM
-1.37804	JX570706.1	PROPIONIBACTERIUM PHAGE PHL037M02, COMPLETE GENOME. [26-MAY-2017]	PROPIONIBACTERIUM	NC_022198.1	CORYNEBACTERIUM ARGENTORATENSE DSM 44202, COMPLETE GENOME	CORYNEBACTERIUM
-1.37873	JX570707.1	PROPIONIBACTERIUM PHAGE PHL085M01, COMPLETE GENOME. [26-MAY-2017]	PROPIONIBACTERIUM	NC_022198.1	CORYNEBACTERIUM ARGENTORATENSE DSM 44202, COMPLETE GENOME	CORYNEBACTERIUM
-1.37494	JX570709.1	PROPIONIBACTERIUM PHAGE PHL067M10, COMPLETE GENOME. [26-MAY-2017]	PROPIONIBACTERIUM	NC_022198.1	CORYNEBACTERIUM ARGENTORATENSE DSM 44202, COMPLETE GENOME	CORYNEBACTERIUM
-1.37537	JX570710.1	PROPIONIBACTERIUM PHAGE PHL071N05, COMPLETE GENOME. [26-MAY-2017]	PROPIONIBACTERIUM	NC_022198.1	CORYNEBACTERIUM ARGENTORATENSE DSM 44202, COMPLETE GENOME	CORYNEBACTERIUM
-1.37729	JX570712.1	PROPIONIBACTERIUM PHAGE PHL114L00, COMPLETE GENOME. [26-MAY-2017]	PROPIONIBACTERIUM	NC_022198.1	CORYNEBACTERIUM ARGENTORATENSE DSM 44202, COMPLETE GENOME	CORYNEBACTERIUM
-1.37654	JX570713.1	PROPIONIBACTERIUM PHAGE PHL113M01, COMPLETE GENOME. [26-MAY-2017]	PROPIONIBACTERIUM	NC_022198.1	CORYNEBACTERIUM ARGENTORATENSE DSM 44202, COMPLETE GENOME	CORYNEBACTERIUM
-1.37438	JX570714.1	PROPIONIBACTERIUM PHAGE PHL112N00, COMPLETE GENOME. [26-MAY-2017]	PROPIONIBACTERIUM	NC_022198.1	CORYNEBACTERIUM ARGENTORATENSE DSM 44202, COMPLETE GENOME	CORYNEBACTERIUM
-1.4024	JX625144.1	ENTEROBACTERIA PHAGE M, COMPLETE GENOME. [29-MAY-2015]	ENTEROBACTERIA	CP001797.1	PSEUDOALTEROMONAS SP. SM9913 CHROMOSOME II, COMPLETE SEQUENCE	PSEUDOALTEROMONAS
-1.28174	JX649097.1	MYCOBACTERIUM PHAGE PIGLET, COMPLETE GENOME. [26-MAY-2017]	MYCOBACTERIUM	NC_018289.1	MYCOBACTERIUM SMEGMATIS STR. MC2 155, COMPLETE GENOME	MYCOBACTERIUM
-1.28173	JX649097.2	MYCOBACTERIUM PHAGE PIGLET, COMPLETE GENOME	MYCOBACTERIUM	NC_018289.1	MYCOBACTERIUM SMEGMATIS STR. MC2 155, COMPLETE GENOME	MYCOBACTERIUM
-1.28188	JX649100.1	MYCOBACTERIUM PHAGE ALEX, COMPLETE GENOME. [26-MAY-2017]	MYCOBACTERIUM	NC_018289.1	MYCOBACTERIUM SMEGMATIS STR. MC2 155, COMPLETE GENOME	MYCOBACTERIUM
-1.3705	JX658790.1	ACINETOBACTER PHAGE ABP1, COMPLETE GENOME. [26-MAY-2017]	ACINETOBACTER	CP010817.1	MYROIDES PROFUNDI STRAIN D25, COMPLETE GENOME	MYROIDES
-1.34368	JX676771.1	PSEUDOMONAS PHAGE AF, COMPLETE GENOME. [26-MAY-2017]	PSEUDOMONAS	NC_021491.1	PSEUDOMONAS PUTIDA H8234, COMPLETE GENOME	PSEUDOMONAS
-1.26976	JX681814.1	BURKHOLDERIA PHAGE PHIX216, COMPLETE GENOME. [25-AUG-2017]	BURKHOLDERIA	BX571966.1	BURKHOLDERIA PSEUDOMALLEI STRAIN K96243, CHROMOSOME 2, COMPLETE SEQUENCE	BURKHOLDERIA
-1.30451	JX846612.1	STAPHYLOCOCCUS PHAGE VB_SAUM_REMUS, COMPLETE GENOME. [25-AUG-2017]	STAPHYLOCOCCUS	FN665652.1	CLOSTRIDIUM DIFFICILE COMPLETE GENOME, STRAIN CF5	CLOSTRIDIUM
-1.30504	JX846613.1	STAPHYLOCOCCUS PHAGE VB_SAUM_ROMULUS, COMPLETE GENOME. [25-AUG-2017]	STAPHYLOCOCCUS	FN665652.1	CLOSTRIDIUM DIFFICILE COMPLETE GENOME, STRAIN CF5	CLOSTRIDIUM
-1.3927	JX863101.2	PSEUDOMONAS PHAGE UFV-P2, COMPLETE GENOME. [25-AUG-2017]	PSEUDOMONAS	NC_014008.1	CORALIOMARGARITA AKAJIMENSIS DSM 45221, COMPLETE GENOME	CORALIOMARGARITA
-1.3724	JX865427.2	ENTEROBACTERIA PHAGE JL1, COMPLETE GENOME. [25-AUG-2017]	ENTEROBACTERIA	AP014565.1	SALMONELLA ENTERICA SUBSP. ENTERICA SEROVAR TYPHIMURIUM STR. L-3553 DNA, COMPLETE GENOME	SALMONELLA
-1.38609	JX866719.1	KLEBSIELLA PHAGE JD001, COMPLETE GENOME. [25-AUG-2017]	KLEBSIELLA	NC_017641.1	ESCHERICHIA COLI UMNK88, COMPLETE GENOME	ESCHERICHIA
-1.37732	JX867715.1	ENTEROBACTERIA PHAGE NJ01,COMPLETE SEQUENCE	ENTEROBACTERIA	CP010976.1	PAENIBACILLUS SP. IHBB 10380, COMPLETE GENOME	PAENIBACILLUS
-1.34756	JX871397.1	ENTEROBACTERIA PHAGE PHI80, COMPLETE GENOME. [26-MAY-2017]	ENTEROBACTERIA	NC_010473.1	ESCHERICHIA COLI STR. K12 SUBSTR. DH10B, COMPLETE GENOME	ESCHERICHIA
-1.38924	JX872508.1	STENOTROPHOMONAS PHAGE IME15, COMPLETE GENOME. [25-AUG-2017]	STENOTROPHOMONAS	CP007152.1	MARINOBACTER SALARIUS STRAIN R9SW1, COMPLETE GENOME	MARINOBACTER
-1.30158	JX875065.1	STAPHYLOCOCCUS PHAGE SA5, COMPLETE GENOME. [25-AUG-2017]	STAPHYLOCOCCUS	NC_014393.1	CLOSTRIDIUM CELLULOVORANS 743B, COMPLETE GENOME	CLOSTRIDIUM
-1.3759	JX878496.1	SERRATIA PHAGE PHIMAM1, COMPLETE GENOME. [25-AUG-2017]	SERRATIA	CP007152.1	MARINOBACTER SALARIUS STRAIN R9SW1, COMPLETE GENOME	MARINOBACTER
-1.30173	JX878671.1	STAPHYLOCOCCUS PHAGE JD007, COMPLETE GENOME. [25-AUG-2017]	STAPHYLOCOCCUS	NC_014393.1	CLOSTRIDIUM CELLULOVORANS 743B, COMPLETE GENOME	CLOSTRIDIUM
-1.3519	JX879087.1	STREPTOCOCCUS PHAGE PHINJ2, COMPLETE GENOME. [25-AUG-2017]	STREPTOCOCCUS	NC_017950.1	STREPTOCOCCUS SUIS ST1, COMPLETE GENOME	STREPTOCOCCUS
-1.3818	JX880034.1	ENTEROBACTER PHAGE IME11, COMPLETE GENOME. [25-AUG-2017]	ENTEROBACTER	CP009281.1	PAENIBACILLUS SP. FSL R5-0345, COMPLETE GENOME	PAENIBACILLUS
-1.38738	JX880072.1	VIBRIO PHAGE VPMS1, COMPLETE GENOME. [26-MAY-2017]	VIBRIO	NC_018692.1	ALTEROMONAS MACLEODII STR. 'BLACK SEA 11', COMPLETE GENOME	ALTEROMONAS
-1.3281	JX887877.1	BACILLUS PHAGE VB_BTS_BMBTP2, COMPLETE GENOME. [25-AUG-2017]	BACILLUS	CP010577.1	BACILLUS THURINGIENSIS SEROVAR MORRISONI STRAIN BGSC 4AA1, COMPLETE GENOME	BACILLUS
-1.31353	JX899358.1	MYCOBACTERIUM PHAGE FIRST, COMPLETE GENOME. [25-AUG-2017]	MYCOBACTERIUM	NC_016604.1	MYCOBACTERIUM RHODESIAE NBB3, COMPLETE GENOME	MYCOBACTERIUM
-1.36434	JX901189.1	MYCOBACTERIUM PHAGE VB_MAPS_FF47, COMPLETE GENOME. [25-AUG-2017]	MYCOBACTERIUM	NC_015564.1	HOYOSELLA SUBFLAVA DQS3-9A1, COMPLETE GENOME	HOYOSELLA
-1.38466	JX912252.1	ESCHERICHIA PHAGE ADB-2, COMPLETE GENOME. [25-AUG-2017]	ESCHERICHIA	CP004083.1	ENTEROBACTERIACEAE BACTERIUM BTA3-1, COMPLETE GENOME	ENTEROBACTERIACEAE
-1.39951	JX944686.1	SULFOLOBALES MEXICAN RUDIVIRUS 1, COMPLETE GENOME	SULFOLOBALES	NC_021713.1	ALTEROMONAS MEDITERRANEA UM7, COMPLETE GENOME	ALTEROMONAS
-1.35166	JX976549.1	ACINETOBACTER PHAGE IME-AB2, COMPLETE GENOME. [25-AUG-2017]	ACINETOBACTER	NC_014259.1	ACINETOBACTER OLEIVORANS DR1, COMPLETE GENOME	ACINETOBACTER
-1.33746	JX997978.1	PSEUDOMONAS PHAGE MPK6, COMPLETE GENOME. [26-MAY-2017]	PSEUDOMONAS	NC_022738.1	PSEUDOMONAS SP. VLB120, COMPLETE GENOME	PSEUDOMONAS
-1.30077	KC012913.1	STAPHYLOCOCCUS PHAGE TEAM1, COMPLETE GENOME. [25-AUG-2017]	STAPHYLOCOCCUS	FN665652.1	CLOSTRIDIUM DIFFICILE COMPLETE GENOME, STRAIN CF5	CLOSTRIDIUM
-1.35954	KC013021.1	LEUCONOSTOC PHAGE P793, COMPLETE GENOME. [25-AUG-2017]	LEUCONOSTOC	NC_003910.7	COLWELLIA PSYCHRERYTHRAEA 34H, COMPLETE GENOME	COLWELLIA
-1.35829	KC013022.1	LEUCONOSTOC PHAGE PHILN03, COMPLETE GENOME	LEUCONOSTOC	NC_003910.7	COLWELLIA PSYCHRERYTHRAEA 34H, COMPLETE GENOME	COLWELLIA
-1.35883	KC013023.1	LEUCONOSTOC PHAGE PHILN04, COMPLETE GENOME. [25-AUG-2017]	LEUCONOSTOC	NC_003910.7	COLWELLIA PSYCHRERYTHRAEA 34H, COMPLETE GENOME	COLWELLIA
-1.35557	KC013024.1	LEUCONOSTOC PHAGE PHILN6B, COMPLETE GENOME	LEUCONOSTOC	NC_003910.7	COLWELLIA PSYCHRERYTHRAEA 34H, COMPLETE GENOME	COLWELLIA
-1.35726	KC013025.1	LEUCONOSTOC PHAGE PHILN12, COMPLETE GENOME	LEUCONOSTOC	NC_003910.7	COLWELLIA PSYCHRERYTHRAEA 34H, COMPLETE GENOME	COLWELLIA
-1.35545	KC013026.1	LEUCONOSTOC PHAGE PHILN25, COMPLETE GENOME	LEUCONOSTOC	NC_009487.1	STAPHYLOCOCCUS AUREUS SUBSP. AUREUS JH9, COMPLETE GENOME	STAPHYLOCOCCUS
-1.35816	KC013027.1	LEUCONOSTOC PHAGE PHILN34, COMPLETE GENOME	LEUCONOSTOC	CP007447.1	STAPHYLOCOCCUS AUREUS STRAIN XN108, COMPLETE GENOME	STAPHYLOCOCCUS
-1.35792	KC013028.1	LEUCONOSTOC PHAGE PHILNTR2, COMPLETE GENOME	LEUCONOSTOC	CP007447.1	STAPHYLOCOCCUS AUREUS STRAIN XN108, COMPLETE GENOME	STAPHYLOCOCCUS
-1.35815	KC013029.1	LEUCONOSTOC PHAGE PHILNTR3, COMPLETE GENOME	LEUCONOSTOC	CP007447.1	STAPHYLOCOCCUS AUREUS STRAIN XN108, COMPLETE GENOME	STAPHYLOCOCCUS
-1.37117	KC107834.1	CRONOBACTER SAKAZAKII PHAGE VB_CSKP_GAP227, COMPLETE GENOME. [26-MAY-2017]	CRONOBACTER	CP007152.1	MARINOBACTER SALARIUS STRAIN R9SW1, COMPLETE GENOME	MARINOBACTER
-1.3252	KC117376.1	HALOVIRUS HSTV-2, COMPLETE GENOME	HALOVIRUS	NC_017941.2	HALOFERAX MEDITERRANEI ATCC 33500, COMPLETE GENOME	HALOFERAX
-1.34096	KC117377.1	HALOVIRUS HVTV-1, COMPLETE GENOME	HALOVIRUS	NC_014729.1	HALOGEOMETRICUM BORINQUENSE DSM 11551, COMPLETE GENOME	HALOGEOMETRICUM
-1.33817	KC117378.1	HALOVIRUS HSTV-1, COMPLETE GENOME	HALOVIRUS	NC_014729.1	HALOGEOMETRICUM BORINQUENSE DSM 11551, COMPLETE GENOME	HALOGEOMETRICUM
-1.3685	KC131021.1	MARINE GOKUSHOVIRUS ISOLATE GOM, COMPLETE GENOME	UNKNOWN	NC_007350.1	STAPHYLOCOCCUS SAPROPHYTICUS SUBSP. SAPROPHYTICUS ATCC 15305 DNA, COMPLETE GENOME	STAPHYLOCOCCUS
-1.37265	KC131129.1	VIBRIO PHAGE VH7D, COMPLETE GENOME. [25-AUG-2017]	VIBRIO	FM954972.2	VIBRIO SPLENDIDUS LGP32 CHROMOSOME 1	VIBRIO
-1.3609	KC139512.1	SALMONELLA PHAGE FSL SP-088, COMPLETE GENOME. [26-MAY-2017]	SALMONELLA	CP007546.1	ENTEROBACTER ASBURIAE L1, COMPLETE GENOME	ENTEROBACTER
-1.36722	KC139517.1	SALMONELLA PHAGE FSL SP-058, COMPLETE GENOME. [25-AUG-2017]	SALMONELLA	NC_010628.1	NOSTOC PUNCTIFORME PCC 73102, COMPLETE GENOME	NOSTOC
-1.38007	KC139518.1	SALMONELLA PHAGE FSL SP-031, COMPLETE GENOME. [25-AUG-2017]	SALMONELLA	NC_011205.1	SALMONELLA ENTERICA SUBSP. ENTERICA SEROVAR DUBLIN STR. CT_02021853, COMPLETE GENOME	SALMONELLA
-1.36013	KC139519.1	SALMONELLA PHAGE FSL SP-030, COMPLETE GENOME. [26-MAY-2017]	SALMONELLA	CP008823.1	ENTEROBACTER CLOACAE ECNIH2, COMPLETE GENOME	ENTEROBACTER
-1.36657	KC139520.1	SALMONELLA PHAGE FSL SP-076, COMPLETE GENOME. [25-AUG-2017]	SALMONELLA	NC_010001.1	LACHNOCLOSTRIDIUM PHYTOFERMENTANS ISDG, COMPLETE GENOME	LACHNOCLOSTRIDIUM
-1.33263	KC139521.1	SALMONELLA PHAGE FSL SP-004, COMPLETE GENOME. [25-AUG-2017]	SALMONELLA	CP010280.1	SALMONELLA ENTERICA SUBSP. ENTERICA SEROVAR NEWPORT STR. CVM 22462, COMPLETE GENOME	SALMONELLA
-1.38166	KC139523.1	SALMONELLA PHAGE FSL SP-063 HYPOTHETICAL PROTEIN GENES, COMPLETE CDS; TRNA-MET, TRNA-TRP, TRNA-ASN, TRNA-OTHER, TRNA-SER, AND TRNA-OTHER GENES, COMPLETE SEQUENCE; AND HYPOTHETICAL PROTEINS, DNA POLYMERASE, HYPOTHETICAL PROTEINS, RIIA PROTECTOR FROM PROPHAGE-INDUCED EARLY LYSIS, RIIB PROTECTOR	SALMONELLA	NC_023037.2	PAENIBACILLUS POLYMYXA CR1, COMPLETE GENOME	PAENIBACILLUS
-1.36731	KC139526.1	SALMONELLA PHAGE FSL SP-010 HYPOTHETICAL PROTEINS, PUTATIVE PSET POLYNUCLEOTIDE 5'-KINASE/3'-PHOSPHATASE, HYPOTHETICAL PROTEIN, RIIB PROTEIN, RIIA PROTEIN, HYPOTHETICAL PROTEINS, NICOTINAMIDE PHOSPHORIBOSYL TRANSFERASE, PUTATIVE RIBOSE-PHOSPHATE PYROPHOSPHOKINASE, HYPOTHETICAL PROTEINS, RIBONUCLEOTIDE REDUCTASE OF CLASS III, HYPOTHETICAL PROTEINS, RIBONUCLEOTIDE	SALMONELLA	NC_016603.1	ACINETOBACTER PITTII PHEA-2 CHROMOSOME, COMPLETE GENOME	ACINETOBACTER
-1.36118	KC139527.1	SALMONELLA PHAGE FSL SP-010 PUTATIVE TAIL FIBER PROTEIN GENE, PARTIAL CDS; HYPOTHETICAL PROTEINS, PUTATIVE BASEPLATE ASSEMBLY PROTEIN, HYPOTHETICAL PROTEINS, STRUCTURAL PROTEIN, HYPOTHETICAL PROTEINS, MAJOR CAPSID PROTEIN, STRUCTURAL PROTEIN, PUTATIVE PROHEAD PROTEASE, HYPOTHETICAL PROTEINS, TERMINASE	SALMONELLA	NC_015558.1	STREPTOCOCCUS PARAUBERIS KCTC 11537, COMPLETE GENOME	STREPTOCOCCUS
-1.36602	KC139528.1	SALMONELLA PHAGE FSL SP-010 HYPOTHETICAL PROTEINS, LYSIN, AND HYPOTHETICAL PROTEINS GENES, COMPLETE CDS; AND TRNA-PRO, TRNA-GLU, TRNA-MET, TRNA-ASN, TRNA-TYR, TRNA-ASP, TRNA-LYS, TRNA-MET, AND TRNA-ILE GENES, COMPLETE SEQUENCE	SALMONELLA	NC_015275.1	CLOSTRIDIUM LENTOCELLUM DSM 5427, COMPLETE GENOME	CLOSTRIDIUM
-1.36481	KC139543.1	SALMONELLA PHAGE FSL SP-012 PUTATIVE TAIL FIBER PROTEIN GENE, PARTIAL CDS; HYPOTHETICAL PROTEINS, PUTATIVE BASEPLATE COMPONENT, HYPOTHETICAL PROTEIN, PUTATIVE BASEPLATE ASSEMBLY PROTEIN, HYPOTHETICAL PROTEINS, STRUCTURAL PROTEIN, HYPOTHETICAL PROTEINS, MAJOR CAPSID PROTEIN, STRUCTURAL PROTEIN, PUTATIVE	SALMONELLA	NC_015558.1	STREPTOCOCCUS PARAUBERIS KCTC 11537, COMPLETE GENOME	STREPTOCOCCUS
-1.36712	KC139544.1	SALMONELLA PHAGE FSL SP-012 HYPOTHETICAL PROTEIN GENE, PARTIAL CDS; AND HYPOTHETICAL PROTEINS, THYMIDYLATE SYNTHASE, DIHYDROFOLATE REDUCTASE, HYPOTHETICAL PROTEINS, PUTATIVE TRANSCRIPTIONAL REGULATORY PROTEIN, HYPOTHETICAL PROTEINS, ATP-DEPENDENT DNA LIGASE, HYPOTHETICAL PROTEINS, PUTATIVE DNA POLYMERASE, ENDONUCLEASE, PUTATIVE	SALMONELLA	NC_010001.1	LACHNOCLOSTRIDIUM PHYTOFERMENTANS ISDG, COMPLETE GENOME	LACHNOCLOSTRIDIUM
-1.37851	KC139559.1	SALMONELLA PHAGE FSL SP-049 HYPOTHETICAL PROTEIN, HELICASE, HYPOTHETICAL PROTEINS, DNA POLYMERASE I, MOM, HYPOTHETICAL PROTEIN, ENDONUCLEASE, HYPOTHETICAL PROTEINS, PUTATIVE HNH ENDONUCLEASE, PUTATIVE PHAGE REPLICATIVE HELICASE/PRIMEASE, HYPOTHETICAL PROTEINS, LYSOZYME, HYPOTHETICAL PROTEINS, PHAGE STRUCTURAL PROTEIN, HEAD	SALMONELLA	CP007557.1	CITROBACTER FREUNDII CFNIH1, COMPLETE GENOME	CITROBACTER
-1.38898	KC139564.1	SALMONELLA PHAGE FSL SP-029 HYPOTHETICAL PROTEIN GENES, COMPLETE CDS; TRNA-MET, TRNA-TRP, TRNA-ASN, TRNA-OTHER, TRNA-SER, AND TRNA-OTHER GENES, COMPLETE SEQUENCE; HYPOTHETICAL PROTEIN GENES, COMPLETE CDS; AND HYPOTHETICAL PROTEIN GENE, PARTIAL CDS	SALMONELLA	NC_014622.2	PAENIBACILLUS POLYMYXA SC2, COMPLETE GENOME	PAENIBACILLUS
-1.37128	KC139636.1	SALMONELLA PHAGE FSL SP-062 HYPOTHETICAL PROTEINS, RDGC EXONUCLEASE, HYPOTHETICAL PROTEINS, TERL, AND HYPOTHETICAL PROTEINS GENES, COMPLETE CDS	SALMONELLA	CP009367.1	YERSINIA ENTEROCOLITICA STRAIN WA, COMPLETE GENOME	YERSINIA
-1.38124	KC139652.1	SALMONELLA PHAGE FSL SP-038 HYPOTHETICAL PROTEINS, TAIL LENGTH TAPE MEASURE-RELATED PROTEIN, HYPOTHETICAL PROTEINS, TAIL FIBER PROTEIN, HYPOTHETICAL PROTEIN, HELICASE, HYPOTHETICAL PROTEINS, DNA POLYMERASE I, MOM, HYPOTHETICAL PROTEIN, ENDONUCLEASE, AND HYPOTHETICAL PROTEINS GENES, COMPLETE CDS;	SALMONELLA	NC_011205.1	SALMONELLA ENTERICA SUBSP. ENTERICA SEROVAR DUBLIN STR. CT_02021853, COMPLETE GENOME	SALMONELLA
-1.36482	KC171647.1	LACTOBACILLUS PHAGE PL-1, COMPLETE GENOME. [25-AUG-2017]	LACTOBACILLUS	NC_010999.1	LACTOBACILLUS CASEI BL23 COMPLETE GENOME, STRAIN BL23	LACTOBACILLUS
-1.31295	KC172839.1	MYCOBACTERIUM PHAGE BTCU-1, COMPLETE GENOME. [25-AUG-2017]	MYCOBACTERIUM	CP009914.1	MYCOBACTERIUM SP. VKM AC-1817D, COMPLETE GENOME	MYCOBACTERIUM
-1.34191	KC182542.1	LACTOCOCCUS PHAGE 340, COMPLETE GENOME. [25-AUG-2017]	LACTOCOCCUS	NC_019425.2	CARNOBACTERIUM MALTAROMATICUM LMA28 COMPLETE GENOME	CARNOBACTERIUM
-1.34546	KC182543.1	LACTOCOCCUS LACTIS PHAGE 645, COMPLETE GENOME. [25-AUG-2017]	LACTOCOCCUS	NC_019425.2	CARNOBACTERIUM MALTAROMATICUM LMA28 COMPLETE GENOME	CARNOBACTERIUM
-1.34081	KC182546.1	LACTOCOCCUS PHAGE JM2, COMPLETE GENOME. [25-AUG-2017]	LACTOCOCCUS	CP006837.1	LYSINIBACILLUS VARIANS STRAIN GY32, COMPLETE GENOME	LYSINIBACILLUS
-1.34022	KC182547.1	LACTOCOCCUS PHAGE JM3, COMPLETE GENOME. [25-AUG-2017]	LACTOCOCCUS	NC_018500.1	BACILLUS THURINGIENSIS HD-771, COMPLETE GENOME	BACILLUS
-1.34456	KC182551.1	LACTOCOCCUS PHAGE P680, COMPLETE GENOME. [25-AUG-2017]	LACTOCOCCUS	CP006766.1	LACTOCOCCUS LACTIS SUBSP. LACTIS KLDS 4.0325, COMPLETE GENOME	LACTOCOCCUS
-1.33992	KC182552.1	LACTOCOCCUS PHAGE PHI7, COMPLETE GENOME. [25-AUG-2017]	LACTOCOCCUS	NC_015275.1	CLOSTRIDIUM LENTOCELLUM DSM 5427, COMPLETE GENOME	CLOSTRIDIUM
-1.26293	KC237729.1	CLOSTRIDIUM PHAGE VB_CPES-CP51, COMPLETE GENOME. [25-AUG-2017]	CLOSTRIDIUM	NC_020291.1	CLOSTRIDIUM SACCHAROPERBUTYLACETONICUM N1-4(HMT), COMPLETE GENOME	CLOSTRIDIUM
-1.27604	KC252997.1	HALOVIRUS PH1, COMPLETE GENOME	HALOVIRUS	NC_013929.1	STREPTOMYCES SCABIEI 87.22 COMPLETE GENOME	STREPTOMYCES
-1.34914	KC292020.1	HALOVIRUS HRTV-8, COMPLETE GENOME	HALOVIRUS	NC_017941.2	HALOFERAX MEDITERRANEI ATCC 33500, COMPLETE GENOME	HALOFERAX
-1.33001	KC292021.1	HALOVIRUS HRTV-7, COMPLETE GENOME	HALOVIRUS	NC_017941.2	HALOFERAX MEDITERRANEI ATCC 33500, COMPLETE GENOME	HALOFERAX
-1.35481	KC292022.1	HALOVIRUS HRTV-5, COMPLETE GENOME	HALOVIRUS	NC_017941.2	HALOFERAX MEDITERRANEI ATCC 33500, COMPLETE GENOME	HALOFERAX
-1.35696	KC292023.1	HALOVIRUS HRTV-4, COMPLETE GENOME	HALOVIRUS	NC_014729.1	HALOGEOMETRICUM BORINQUENSE DSM 11551, COMPLETE GENOME	HALOGEOMETRICUM
-1.30261	KC292024.1	HALOVIRUS HHTV-2, COMPLETE GENOME	HALOVIRUS	NC_016114.1	STREPTOMYCES PRATENSIS ATCC 33331, COMPLETE GENOME	STREPTOMYCES
-1.34261	KC292025.1	HALOVIRUS HHTV-1, COMPLETE GENOME	HALOVIRUS	NC_017506.1	MARINOBACTER ADHAERENS HP15, COMPLETE GENOME	MARINOBACTER
-1.39641	KC292026.1	HALOVIRUS HGTV-1, COMPLETE GENOME	HALOVIRUS	NC_014729.1	HALOGEOMETRICUM BORINQUENSE DSM 11551, COMPLETE GENOME	HALOGEOMETRICUM
-1.34564	KC292027.1	HALOVIRUS HCTV-5, COMPLETE GENOME	HALOVIRUS	NC_014729.1	HALOGEOMETRICUM BORINQUENSE DSM 11551, COMPLETE GENOME	HALOGEOMETRICUM
-1.27031	KC292028.1	HALOVIRUS HCTV-2, COMPLETE GENOME	HALOVIRUS	NC_008095.1	MYXOCOCCUS XANTHUS DK 1622, COMPLETE GENOME	MYXOCOCCUS
-1.34564	KC292029.1	HALOVIRUS HCTV-1, COMPLETE GENOME	HALOVIRUS	NC_014729.1	HALOGEOMETRICUM BORINQUENSE DSM 11551, COMPLETE GENOME	HALOGEOMETRICUM
-1.34009	KC295538.1	ESCHERICHIA PHAGE PBECO 4, COMPLETE GENOME. [25-AUG-2017]	ESCHERICHIA	CP007208.1	STAPHYLOCOCCUS XYLOSUS STRAIN HKUOPL8, COMPLETE GENOME	STAPHYLOCOCCUS
-1.39165	KC310802.1	SYNECHOCOCCUS PHAGE S-CBP1, COMPLETE GENOME. [26-MAY-2017]	SYNECHOCOCCUS	CP000554.1	PROCHLOROCOCCUS MARINUS STR. MIT 9303, COMPLETE GENOME	PROCHLOROCOCCUS
-1.38909	KC310803.1	SYNECHOCOCCUS PHAGE S-CBP3, COMPLETE GENOME. [26-MAY-2017]	SYNECHOCOCCUS	CP009281.1	PAENIBACILLUS SP. FSL R5-0345, COMPLETE GENOME	PAENIBACILLUS
-1.38466	KC310804.1	SYNECHOCOCCUS PHAGE S-CBP4, COMPLETE GENOME. [26-MAY-2017]	SYNECHOCOCCUS	CP009281.1	PAENIBACILLUS SP. FSL R5-0345, COMPLETE GENOME	PAENIBACILLUS
-1.38021	KC310805.1	SYNECHOCOCCUS PHAGE S-CBP42, COMPLETE GENOME. [26-MAY-2017]	SYNECHOCOCCUS	NC_008319.1	SYNECHOCOCCUS SP. CC9311, COMPLETE GENOME	SYNECHOCOCCUS
-1.38159	KC310806.1	SYNECHOCOCCUS PHAGE S-CBP2, COMPLETE GENOME. [26-MAY-2017]	SYNECHOCOCCUS	CP006269.1	SYNECHOCOCCUS SP. KORDI-100, COMPLETE GENOME	SYNECHOCOCCUS
-1.36468	KC311669.1	ACINETOBACTER PHAGE AB3, COMPLETE GENOME. [26-MAY-2017]	ACINETOBACTER	CP010817.1	MYROIDES PROFUNDI STRAIN D25, COMPLETE GENOME	MYROIDES
-1.38406	KC330679.1	BACILLUS PHAGE CURLY, COMPLETE GENOME. [25-AUG-2017]	BACILLUS	CP010976.1	PAENIBACILLUS SP. IHBB 10380, COMPLETE GENOME	PAENIBACILLUS
-1.38335	KC330680.1	BACILLUS PHAGE EOGHAN, COMPLETE GENOME. [25-AUG-2017]	BACILLUS	CP010976.1	PAENIBACILLUS SP. IHBB 10380, COMPLETE GENOME	PAENIBACILLUS
-1.38421	KC330681.1	BACILLUS PHAGE GEMINI, COMPLETE GENOME. [25-AUG-2017]	BACILLUS	NC_018515.1	DESULFOSPOROSINUS MERIDIEI DSM 13257, COMPLETE GENOME	DESULFOSPOROSINUS
-1.38313	KC330682.1	BACILLUS PHAGE TAYLOR, COMPLETE GENOME. [25-AUG-2017]	BACILLUS	CP009281.1	PAENIBACILLUS SP. FSL R5-0345, COMPLETE GENOME	PAENIBACILLUS
-1.3821	KC330683.1	BACILLUS PHAGE FINN, COMPLETE GENOME. [25-AUG-2017]	BACILLUS	CP009281.1	PAENIBACILLUS SP. FSL R5-0345, COMPLETE GENOME	PAENIBACILLUS
-1.38419	KC330684.1	BACILLUS PHAGE ANDROMEDA, COMPLETE GENOME. [25-AUG-2017]	BACILLUS	CP009281.1	PAENIBACILLUS SP. FSL R5-0345, COMPLETE GENOME	PAENIBACILLUS
-1.30697	KC342645.2	STAPHYLOCOCCUS PHAGE JS01, COMPLETE GENOME. [25-AUG-2017]	STAPHYLOCOCCUS	CP007454.1	STAPHYLOCOCCUS AUREUS STRAIN 502A, COMPLETE GENOME	STAPHYLOCOCCUS
-1.30296	KC348603.1	STREPTOCOCCUS PHAGE PHID12, COMPLETE GENOME. [26-MAY-2017]	STREPTOCOCCUS	NC_017621.1	STREPTOCOCCUS SUIS D12, COMPLETE GENOME	STREPTOCOCCUS
-1.37151	KC357596.1	VIBRIO PHAGE VFJ, COMPLETE GENOME. [25-AUG-2017]	VIBRIO	NC_009654.1	MARINOMONAS SP. MWYL1, COMPLETE GENOME	MARINOMONAS
-1.31402	KC413987.1	STREPTOCOCCUS PHAGE PHISS12, COMPLETE GENOME. [26-MAY-2017]	STREPTOCOCCUS	NC_017619.1	STREPTOCOCCUS SUIS SS12, COMPLETE GENOME	STREPTOCOCCUS
-1.36918	KC430106.1	BACILLUS PHAGE BPS10C, COMPLETE GENOME. [25-AUG-2017]	BACILLUS	CP010817.1	MYROIDES PROFUNDI STRAIN D25, COMPLETE GENOME	MYROIDES
-1.34051	KC438282.1	VIBRIO PHAGE JA-1, COMPLETE GENOME. [25-AUG-2017]	VIBRIO	AP014583.1	WINOGRADSKYELLA SP. PG-2 DNA, COMPLETE GENOME	WINOGRADSKYELLA
-1.37742	KC460990.1	SERRATIA PHAGE ETA, COMPLETE GENOME. [25-AUG-2017]	SERRATIA	CP004083.1	ENTEROBACTERIACEAE BACTERIUM BTA3-1, COMPLETE GENOME	ENTEROBACTERIACEAE
-1.30568	KC462197.1	BURKHOLDERIA PHAGE ST79, COMPLETE GENOME. [25-AUG-2017]	BURKHOLDERIA	CP001503.2	BURKHOLDERIA GLUMAE BGR1 CHROMOSOME 1, COMPLETE SEQUENCE	BURKHOLDERIA
-1.30037	KC465898.1	PELAGIBACTER PHAGE HTVC010P, COMPLETE GENOME. [26-MAY-2017]	PELAGIBACTER	NC_020291.1	CLOSTRIDIUM SACCHAROPERBUTYLACETONICUM N1-4(HMT), COMPLETE GENOME	CLOSTRIDIUM
-1.32725	KC465899.1	PELAGIBACTER PHAGE HTVC008M, COMPLETE GENOME. [25-AUG-2017]	PELAGIBACTER	FN665652.1	CLOSTRIDIUM DIFFICILE COMPLETE GENOME, STRAIN CF5	CLOSTRIDIUM
-1.30359	KC465900.1	PELAGIBACTER PHAGE HTVC011P, COMPLETE GENOME. [26-MAY-2017]	PELAGIBACTER	NC_020291.1	CLOSTRIDIUM SACCHAROPERBUTYLACETONICUM N1-4(HMT), COMPLETE GENOME	CLOSTRIDIUM
-1.32484	KC465901.1	PELAGIBACTER PHAGE HTVC019P, COMPLETE GENOME. [25-AUG-2017]	PELAGIBACTER	NC_009089.1	CLOSTRIDIOIDES DIFFICILE 630, COMPLETE GENOME	CLOSTRIDIOIDES
-1.33605	KC481682.1	BACILLUS PHAGE VB_BANS-TSAMSA, COMPLETE GENOME. [25-AUG-2017]	BACILLUS	NC_010001.1	LACHNOCLOSTRIDIUM PHYTOFERMENTANS ISDG, COMPLETE GENOME	LACHNOCLOSTRIDIUM
-1.38782	KC556893.1	BRUCELLA PHAGE BK, COMPLETE GENOME. [26-MAY-2017]	BRUCELLA	NC_016641.1	PAENIBACILLUS TERRAE HPL-003, COMPLETE GENOME	PAENIBACILLUS
-1.38825	KC556894.1	BRUCELLA PHAGE FZ, COMPLETE GENOME. [26-MAY-2017]	BRUCELLA	NC_016641.1	PAENIBACILLUS TERRAE HPL-003, COMPLETE GENOME	PAENIBACILLUS
-1.38783	KC556895.1	BRUCELLA PHAGE R/C, COMPLETE GENOME. [26-MAY-2017]	BRUCELLA	NC_016641.1	PAENIBACILLUS TERRAE HPL-003, COMPLETE GENOME	PAENIBACILLUS
-1.38823	KC556897.1	BRUCELLA PHAGE TB, COMPLETE GENOME. [26-MAY-2017]	BRUCELLA	NC_016641.1	PAENIBACILLUS TERRAE HPL-003, COMPLETE GENOME	PAENIBACILLUS
-1.28147	KC576784.1	MYCOBACTERIUM PHAGE SHIVAL, COMPLETE GENOME. [26-MAY-2017]	MYCOBACTERIUM	NC_018289.1	MYCOBACTERIUM SMEGMATIS STR. MC2 155, COMPLETE GENOME	MYCOBACTERIUM
-1.30704	KC581799.1	STREPTOCOCCUS PHAGE PHID12, COMPLETE GENOME	STREPTOCOCCUS	NC_017621.1	STREPTOCOCCUS SUIS D12, COMPLETE GENOME	STREPTOCOCCUS
-1.3075	KC595278.1	STAPHYLOCOCCUS PHAGE STAUST398-4, COMPLETE GENOME. [25-AUG-2017]	STAPHYLOCOCCUS	CP007447.1	STAPHYLOCOCCUS AUREUS STRAIN XN108, COMPLETE GENOME	STAPHYLOCOCCUS
-1.31205	KC595279.1	STAPHYLOCOCCUS PHAGE STAUST398-5, COMPLETE GENOME. [26-MAY-2017]	STAPHYLOCOCCUS	NC_009487.1	STAPHYLOCOCCUS AUREUS SUBSP. AUREUS JH9, COMPLETE GENOME	STAPHYLOCOCCUS
-1.37569	KC595512.2	BACILLUS PHAGE JL, COMPLETE GENOME. [25-AUG-2017]	BACILLUS	CP010817.1	MYROIDES PROFUNDI STRAIN D25, COMPLETE GENOME	MYROIDES
-1.37552	KC595513.2	BACILLUS PHAGE SHANETTE, COMPLETE GENOME. [25-AUG-2017]	BACILLUS	CP010817.1	MYROIDES PROFUNDI STRAIN D25, COMPLETE GENOME	MYROIDES
-1.36038	KC595515.1	BREVIBACILLUS PHAGE JIMMER1, COMPLETE GENOME. [25-AUG-2017]	BREVIBACILLUS	CP000817.1	LYSINIBACILLUS SPHAERICUS C3-41, COMPLETE GENOME	LYSINIBACILLUS
-1.39191	KC618393.1	SULFOLOBALES MEXICAN FUSELLOVIRUS 1, COMPLETE GENOME	SULFOLOBALES	NC_012883.1	THERMOCOCCUS SIBIRICUS MM 739, COMPLETE GENOME	THERMOCOCCUS
-1.32516	KC661273.1	MYCOBACTERIUM PHAGE PATTYP, COMPLETE GENOME. [25-AUG-2017]	MYCOBACTERIUM	CP009914.1	MYCOBACTERIUM SP. VKM AC-1817D, COMPLETE GENOME	MYCOBACTERIUM
-1.32962	KC661275.1	MYCOBACTERIUM PHAGE HINDER, COMPLETE GENOME. [25-AUG-2017]	MYCOBACTERIUM	NC_016604.1	MYCOBACTERIUM RHODESIAE NBB3, COMPLETE GENOME	MYCOBACTERIUM
-1.3772	KC661276.1	MYCOBACTERIUM PHAGE WINKY, COMPLETE GENOME. [26-MAY-2017]	MYCOBACTERIUM	NC_015564.1	HOYOSELLA SUBFLAVA DQS3-9A1, COMPLETE GENOME	HOYOSELLA
-1.33233	KC661277.1	MYCOBACTERIUM PHAGE PHRUX, COMPLETE GENOME. [25-AUG-2017]	MYCOBACTERIUM	NC_018150.2	MYCOBACTERIUM ABSCESSUS SUBSP. MASSILIENSE STR. GO 06, COMPLETE GENOME	MYCOBACTERIUM
-1.34189	KC661278.1	MYCOBACTERIUM PHAGE SISI, COMPLETE GENOME. [26-MAY-2017]	MYCOBACTERIUM	AP014547.1	MYCOBACTERIUM ABSCESSUS SUBSP. BOLLETII CCUG 48898 = JCM 15300 DNA, COMPLETE GENOME	MYCOBACTERIUM
-1.31796	KC661279.1	MYCOBACTERIUM PHAGE SEVERUS, COMPLETE GENOME. [25-AUG-2017]	MYCOBACTERIUM	CP009914.1	MYCOBACTERIUM SP. VKM AC-1817D, COMPLETE GENOME	MYCOBACTERIUM
-1.34457	KC661280.1	MYCOBACTERIUM PHAGE JOB42, COMPLETE GENOME. [26-MAY-2017]	MYCOBACTERIUM	CP009408.1	MYCOBACTERIUM ABSCESSUS SUBSP. BOLLETII STRAIN MA 1948, COMPLETE GENOME	MYCOBACTERIUM
-1.31644	KC661281.1	MYCOBACTERIUM PHAGE JOBU08, COMPLETE GENOME. [25-AUG-2017]	MYCOBACTERIUM	NC_016604.1	MYCOBACTERIUM RHODESIAE NBB3, COMPLETE GENOME	MYCOBACTERIUM
-1.34608	KC662250.1	PHAEOCYSTIS GLOBOSA VIRUS VIROPHAGE, COMPLETE GENOME	PHAEOCYSTIS	CP006649.1	RIEMERELLA ANATIPESTIFER CH3, COMPLETE GENOME	RIEMERELLA
-1.36141	KC677662.1	SALMONELLA PHAGE IEPS5, COMPLETE GENOME. [26-MAY-2017]	SALMONELLA	CP007546.1	ENTEROBACTER ASBURIAE L1, COMPLETE GENOME	ENTEROBACTER
-1.30802	KC677663.1	STAPHYLOCOCCUS PHAGE SA12, COMPLETE GENOME. [25-AUG-2017]	STAPHYLOCOCCUS	NC_009487.1	STAPHYLOCOCCUS AUREUS SUBSP. AUREUS JH9, COMPLETE GENOME	STAPHYLOCOCCUS
-1.31168	KC685370.1	BACILLUS PHAGE MG-B1, COMPLETE GENOME. [26-MAY-2017]	BACILLUS	NC_014393.1	CLOSTRIDIUM CELLULOVORANS 743B, COMPLETE GENOME	CLOSTRIDIUM
-1.3629	KC688701.1	CROCEIBACTER PHAGE P2559Y, COMPLETE GENOME	CROCEIBACTER	NC_015177.1	PSEUDOPEDOBACTER SALTANS DSM 12145, COMPLETE GENOME	PSEUDOPEDOBACTER
-1.38237	KC690136.1	ESCHERICHIA PHAGE 2 JES-2013, COMPLETE GENOME. [25-AUG-2017]	ESCHERICHIA	CP009279.1	PAENIBACILLUS SP. FSL H7-0737, COMPLETE GENOME	PAENIBACILLUS
-1.37722	KC691254.1	MYCOBACTERIUM PHAGE BREEZONA, COMPLETE GENOME	MYCOBACTERIUM	NC_015564.1	HOYOSELLA SUBFLAVA DQS3-9A1, COMPLETE GENOME	HOYOSELLA
-1.3331	KC691255.2	MYCOBACTERIUM PHAGE DUMBO, COMPLETE GENOME	MYCOBACTERIUM	CP009615.1	MYCOBACTERIUM ABSCESSUS STRAIN DJO-44274, COMPLETE GENOME	MYCOBACTERIUM
-1.27047	KC691256.1	MYCOBACTERIUM PHAGE FISHBURNE, COMPLETE GENOME	MYCOBACTERIUM	NC_018289.1	MYCOBACTERIUM SMEGMATIS STR. MC2 155, COMPLETE GENOME	MYCOBACTERIUM
-1.29791	KC691257.1	MYCOBACTERIUM PHAGE ASTRAEA, COMPLETE GENOME	MYCOBACTERIUM	CP009914.1	MYCOBACTERIUM SP. VKM AC-1817D, COMPLETE GENOME	MYCOBACTERIUM
-1.28245	KC691258.1	MYCOBACTERIUM PHAGE NEWMAN, COMPLETE GENOME	MYCOBACTERIUM	NC_018289.1	MYCOBACTERIUM SMEGMATIS STR. MC2 155, COMPLETE GENOME	MYCOBACTERIUM
-1.29005	KC700556.1	STREPTOMYCES PHAGE LIKA, COMPLETE GENOME	STREPTOMYCES	NC_003155.5	STREPTOMYCES AVERMITILIS MA-4680 = NBRC 14893 DNA, COMPLETE GENOME	STREPTOMYCES
-1.29057	KC700557.1	STREPTOMYCES PHAGE SUJIDADE, COMPLETE GENOME	STREPTOMYCES	NC_003155.5	STREPTOMYCES AVERMITILIS MA-4680 = NBRC 14893 DNA, COMPLETE GENOME	STREPTOMYCES
-1.28941	KC700558.1	STREPTOMYCES PHAGE ZEMLYA, COMPLETE GENOME	STREPTOMYCES	NC_003155.5	STREPTOMYCES AVERMITILIS MA-4680 = NBRC 14893 DNA, COMPLETE GENOME	STREPTOMYCES
-1.3261	KC701493.1	MYCOBACTERIUM PHAGE CASBIG, COMPLETE GENOME. [25-AUG-2017]	MYCOBACTERIUM	NC_016604.1	MYCOBACTERIUM RHODESIAE NBB3, COMPLETE GENOME	MYCOBACTERIUM
-1.34506	KC736071.1	MYCOBACTERIUM PHAGE WIVSMALL, COMPLETE GENOME. [26-MAY-2017]	MYCOBACTERIUM	NC_021282.1	MYCOBACTERIUM ABSCESSUS SUBSP. BOLLETII 50594, COMPLETE GENOME	MYCOBACTERIUM
-1.34131	KC736978.1	SHIGELLA PHAGE SFII, COMPLETE GENOME. [25-AUG-2017]	SHIGELLA	NC_020163.1	ESCHERICHIA COLI APEC O78, COMPLETE GENOME	ESCHERICHIA
-1.29812	KC748968.1	MYCOBACTERIUM PHAGE GIZMO, COMPLETE GENOME	MYCOBACTERIUM	CP009914.1	MYCOBACTERIUM SP. VKM AC-1817D, COMPLETE GENOME	MYCOBACTERIUM
-1.33339	KC748969.1	MYCOBACTERIUM PHAGE PHAUX, COMPLETE GENOME	MYCOBACTERIUM	NC_018150.2	MYCOBACTERIUM ABSCESSUS SUBSP. MASSILIENSE STR. GO 06, COMPLETE GENOME	MYCOBACTERIUM
-1.29811	KC748970.1	MYCOBACTERIUM PHAGE ARCHERS7, COMPLETE GENOME	MYCOBACTERIUM	CP009914.1	MYCOBACTERIUM SP. VKM AC-1817D, COMPLETE GENOME	MYCOBACTERIUM
-1.33406	KC748971.1	MYCOBACTERIUM PHAGE MURPHY, COMPLETE GENOME	MYCOBACTERIUM	AP014547.1	MYCOBACTERIUM ABSCESSUS SUBSP. BOLLETII CCUG 48898 = JCM 15300 DNA, COMPLETE GENOME	MYCOBACTERIUM
-1.39613	KC751414.1	PSEUDOALTEROMONAS PHAGE RIO-1, COMPLETE GENOME. [26-MAY-2017]	PSEUDOALTEROMONAS	CP002122.1	PREVOTELLA MELANINOGENICA ATCC 25845 CHROMOSOME I, COMPLETE SEQUENCE	PREVOTELLA
-1.31309	KC787105.1	MYCOBACTERIUM PHAGE CHY4, COMPLETE GENOME. [25-AUG-2017]	MYCOBACTERIUM	CP009914.1	MYCOBACTERIUM SP. VKM AC-1817D, COMPLETE GENOME	MYCOBACTERIUM
-1.31373	KC787106.1	MYCOBACTERIUM PHAGE CHY5, COMPLETE GENOME. [25-AUG-2017]	MYCOBACTERIUM	NC_016604.1	MYCOBACTERIUM RHODESIAE NBB3, COMPLETE GENOME	MYCOBACTERIUM
-1.27852	KC787107.1	MYCOBACTERIUM PHAGE BO4, COMPLETE GENOME. [25-AUG-2017]	MYCOBACTERIUM	NC_016946.1	MYCOBACTERIUM INTRACELLULARE ATCC 13950, COMPLETE GENOME	MYCOBACTERIUM
-1.27683	KC787108.1	MYCOBACTERIUM PHAGE DNAIII, COMPLETE GENOME. [25-AUG-2017]	MYCOBACTERIUM	NC_019966.1	MYCOBACTERIUM SP. JS623, COMPLETE GENOME	MYCOBACTERIUM
-1.27709	KC787110.1	MYCOBACTERIUM PHAGE LEO, COMPLETE GENOME. [25-AUG-2017]	MYCOBACTERIUM	NC_019966.1	MYCOBACTERIUM SP. JS623, COMPLETE GENOME	MYCOBACTERIUM
-1.37814	KC801932.2	ESCHERICHIA PHAGE LW1, COMPLETE GENOME. [25-AUG-2017]	ESCHERICHIA	NC_013132.1	CHITINOPHAGA PINENSIS DSM 2588, COMPLETE GENOME	CHITINOPHAGA
-1.33286	KC814930.1	SHIGELLA PHAGE SFIV, COMPLETE GENOME. [25-AUG-2017]	SHIGELLA	NC_017633.1	ESCHERICHIA COLI ETEC H10407, COMPLETE GENOME	ESCHERICHIA
-1.30025	KC821604.1	CELLULOPHAGA PHAGE PHIST, COMPLETE GENOME. [25-AUG-2017]	CELLULOPHAGA	NC_020291.1	CLOSTRIDIUM SACCHAROPERBUTYLACETONICUM N1-4(HMT), COMPLETE GENOME	CLOSTRIDIUM
-1.34686	KC821606.1	CELLULOPHAGA PHAGE PHI12:2, COMPLETE GENOME. [03-JAN-2016]	CELLULOPHAGA	NC_014934.1	CELLULOPHAGA ALGICOLA DSM 14237, COMPLETE GENOME	CELLULOPHAGA
-1.31744	KC821607.1	CELLULOPHAGA PHAGE PHI19:1, COMPLETE GENOME. [25-AUG-2017]	CELLULOPHAGA	NC_009617.1	CLOSTRIDIUM BEIJERINCKII NCIMB 8052, COMPLETE GENOME	CLOSTRIDIUM
-1.32355	KC821608.1	CELLULOPHAGA PHAGE PHI19:3, COMPLETE GENOME. [26-MAY-2017]	CELLULOPHAGA	NC_014934.1	CELLULOPHAGA ALGICOLA DSM 14237, COMPLETE GENOME	CELLULOPHAGA
-1.31802	KC821609.1	CELLULOPHAGA PHAGE PHI17:2, COMPLETE GENOME. [26-MAY-2017]	CELLULOPHAGA	NC_014393.1	CLOSTRIDIUM CELLULOVORANS 743B, COMPLETE GENOME	CLOSTRIDIUM
-1.32746	KC821610.1	CELLULOPHAGA PHAGE PHI3ST:2, COMPLETE GENOME. [25-AUG-2017]	CELLULOPHAGA	NC_014393.1	CLOSTRIDIUM CELLULOVORANS 743B, COMPLETE GENOME	CLOSTRIDIUM
-1.35735	KC821611.1	CELLULOPHAGA PHAGE PHI46:1, COMPLETE GENOME. [25-AUG-2017]	CELLULOPHAGA	CP008878.1	FLAVOBACTERIUM PSYCHROPHILUM STRAIN V3-5, COMPLETE GENOME	FLAVOBACTERIUM
-1.36218	KC821612.1	CELLULOPHAGA PHAGE PHI40:1, COMPLETE GENOME. [26-MAY-2017]	CELLULOPHAGA	CP010327.1	MYROIDES SP. A21, COMPLETE GENOME	MYROIDES
-1.34846	KC821613.1	CELLULOPHAGA PHAGE PHI12:1, COMPLETE GENOME. [25-AUG-2017]	CELLULOPHAGA	NC_015914.1	CYCLOBACTERIUM MARINUM DSM 745, COMPLETE GENOME	CYCLOBACTERIUM
-1.36208	KC821614.1	CELLULOPHAGA PHAGE PHI38:1, COMPLETE GENOME. [26-MAY-2017]	CELLULOPHAGA	CP010327.1	MYROIDES SP. A21, COMPLETE GENOME	MYROIDES
-1.34844	KC821615.1	CELLULOPHAGA PHAGE PHI12:3, COMPLETE GENOME. [25-AUG-2017]	CELLULOPHAGA	NC_015914.1	CYCLOBACTERIUM MARINUM DSM 745, COMPLETE GENOME	CYCLOBACTERIUM
-1.32754	KC821616.1	CELLULOPHAGA PHAGE PHISM, COMPLETE GENOME. [26-MAY-2017]	CELLULOPHAGA	NC_014393.1	CLOSTRIDIUM CELLULOVORANS 743B, COMPLETE GENOME	CLOSTRIDIUM
-1.35055	KC821617.1	CELLULOPHAGA PHAGE PHI17:1, COMPLETE GENOME. [25-AUG-2017]	CELLULOPHAGA	NC_015914.1	CYCLOBACTERIUM MARINUM DSM 745, COMPLETE GENOME	CYCLOBACTERIUM
-1.31808	KC821618.1	CELLULOPHAGA PHAGE PHI10:1, COMPLETE GENOME. [25-AUG-2017]	CELLULOPHAGA	AP014583.1	WINOGRADSKYELLA SP. PG-2 DNA, COMPLETE GENOME	WINOGRADSKYELLA
-1.34946	KC821619.1	CELLULOPHAGA PHAGE PHI18:1, COMPLETE GENOME. [25-AUG-2017]	CELLULOPHAGA	NC_015914.1	CYCLOBACTERIUM MARINUM DSM 745, COMPLETE GENOME	CYCLOBACTERIUM
-1.32628	KC821620.1	CELLULOPHAGA PHAGE PHI18:3, COMPLETE GENOME. [26-MAY-2017]	CELLULOPHAGA	NC_014934.1	CELLULOPHAGA ALGICOLA DSM 14237, COMPLETE GENOME	CELLULOPHAGA
-1.30023	KC821621.1	CELLULOPHAGA PHAGE PHI19:2, COMPLETE GENOME. [25-AUG-2017]	CELLULOPHAGA	NC_020291.1	CLOSTRIDIUM SACCHAROPERBUTYLACETONICUM N1-4(HMT), COMPLETE GENOME	CLOSTRIDIUM
-1.32386	KC821622.1	CELLULOPHAGA PHAGE PHI46:3, COMPLETE GENOME. [26-MAY-2017]	CELLULOPHAGA	NC_014934.1	CELLULOPHAGA ALGICOLA DSM 14237, COMPLETE GENOME	CELLULOPHAGA
-1.34287	KC821623.1	CELLULOPHAGA PHAGE PHI12A:1, COMPLETE GENOME. [03-JAN-2016]	CELLULOPHAGA	NC_014934.1	CELLULOPHAGA ALGICOLA DSM 14237, COMPLETE GENOME	CELLULOPHAGA
-1.29799	KC821624.1	CELLULOPHAGA PHAGE PHI14:2, COMPLETE GENOME. [26-MAY-2017]	CELLULOPHAGA	CP006903.1	CLOSTRIDIUM BOTULINUM 202F, COMPLETE GENOME	CLOSTRIDIUM
-1.28525	KC821626.1	CELLULOPHAGA PHAGE PHI39:1, COMPLETE GENOME. [25-AUG-2017]	CELLULOPHAGA	NC_015167.1	CELLULOPHAGA LYTICA DSM 7489, COMPLETE GENOME	CELLULOPHAGA
-1.32752	KC821629.1	CELLULOPHAGA PHAGE PHI38:2, COMPLETE GENOME. [25-AUG-2017]	CELLULOPHAGA	NC_014393.1	CLOSTRIDIUM CELLULOVORANS 743B, COMPLETE GENOME	CLOSTRIDIUM
-1.32779	KC821630.1	CELLULOPHAGA PHAGE PHI3:1, COMPLETE GENOME. [26-MAY-2017]	CELLULOPHAGA	NC_014393.1	CLOSTRIDIUM CELLULOVORANS 743B, COMPLETE GENOME	CLOSTRIDIUM
-1.31787	KC821632.1	CELLULOPHAGA PHAGE PHI4:1, COMPLETE GENOME. [26-MAY-2017]	CELLULOPHAGA	NC_014393.1	CLOSTRIDIUM CELLULOVORANS 743B, COMPLETE GENOME	CLOSTRIDIUM
-1.32582	KC821633.1	CELLULOPHAGA PHAGE PHI13:2, COMPLETE GENOME. [26-MAY-2017]	CELLULOPHAGA	NC_014934.1	CELLULOPHAGA ALGICOLA DSM 14237, COMPLETE GENOME	CELLULOPHAGA
-1.32746	KC821634.1	CELLULOPHAGA PHAGE PHI47:1, COMPLETE GENOME. [25-AUG-2017]	CELLULOPHAGA	NC_014393.1	CLOSTRIDIUM CELLULOVORANS 743B, COMPLETE GENOME	CLOSTRIDIUM
-1.39296	KC832325.1	SALMONELLA PHAGE L13, COMPLETE GENOME. [25-AUG-2017]	SALMONELLA	NC_006511.1	SALMONELLA ENTERICA SUBSP. ENTERICA SEROVAR PARATYPHI A STR. ATCC 9150, COMPLETE GENOME	SALMONELLA
-1.33559	KC853746.1	BURKHOLDERIA PHAGE JG068, COMPLETE GENOME. [26-MAY-2017]	BURKHOLDERIA	CP010518.3	PANDORAEA APISTA STRAIN TF81F4, COMPLETE GENOME	PANDORAEA
-1.38215	KC862295.1	PSEUDOMONAS PHAGE CHA_P1, COMPLETE GENOME. [25-AUG-2017]	PSEUDOMONAS	CP007152.1	MARINOBACTER SALARIUS STRAIN R9SW1, COMPLETE GENOME	MARINOBACTER
-1.39945	KC862297.1	PSEUDOMONAS PHAGE PAK_P1, COMPLETE GENOME. [25-AUG-2017]	PSEUDOMONAS	CP009281.1	PAENIBACILLUS SP. FSL R5-0345, COMPLETE GENOME	PAENIBACILLUS
-1.39932	KC862298.1	PSEUDOMONAS PHAGE PAK_P2, COMPLETE GENOME. [25-AUG-2017]	PSEUDOMONAS	CP009281.1	PAENIBACILLUS SP. FSL R5-0345, COMPLETE GENOME	PAENIBACILLUS
-1.38145	KC862299.1	PSEUDOMONAS PHAGE PAK_P3, COMPLETE GENOME. [25-AUG-2017]	PSEUDOMONAS	CP007152.1	MARINOBACTER SALARIUS STRAIN R9SW1, COMPLETE GENOME	MARINOBACTER
-1.39965	KC862300.1	PSEUDOMONAS PHAGE PAK_P4, COMPLETE GENOME. [25-AUG-2017]	PSEUDOMONAS	CP009281.1	PAENIBACILLUS SP. FSL R5-0345, COMPLETE GENOME	PAENIBACILLUS
-1.38216	KC862301.1	PSEUDOMONAS PHAGE PAK_P5, COMPLETE GENOME. [25-AUG-2017]	PSEUDOMONAS	CP007152.1	MARINOBACTER SALARIUS STRAIN R9SW1, COMPLETE GENOME	MARINOBACTER
-1.34177	KC900379.1	MYCOBACTERIUM PHAGE PEGLEG, COMPLETE GENOME	MYCOBACTERIUM	CP009616.1	MYCOBACTERIUM ABSCESSUS STRAIN 4529, COMPLETE GENOME	MYCOBACTERIUM
-1.36845	KC911856.1	SALMONELLA PHAGE SPC32H, COMPLETE GENOME. [26-MAY-2017]	SALMONELLA	NC_017641.1	ESCHERICHIA COLI UMNK88, COMPLETE GENOME	ESCHERICHIA
-1.36847	KC911857.1	SALMONELLA PHAGE SPC32N, COMPLETE GENOME. [26-MAY-2017]	SALMONELLA	NC_017641.1	ESCHERICHIA COLI UMNK88, COMPLETE GENOME	ESCHERICHIA
-1.38877	KC954774.1	CRONOBACTER PHAGE CR8, COMPLETE GENOME. [25-AUG-2017]	CRONOBACTER	NC_012881.1	DESULFOVIBRIO SALEXIGENS DSM 2638, COMPLETE GENOME	DESULFOVIBRIO
-1.37358	KC954775.1	UNVERIFIED: CRONOBACTER PHAGE S13, COMPLETE GENOME. [25-AUG-2017]	CRONOBACTER	NC_015321.1	FLUVIICOLA TAFFENSIS DSM 16823, COMPLETE GENOME	FLUVIICOLA
-1.33586	KC960489.1	MYCOBACTERIUM PHAGE ADLER, COMPLETE GENOME. [25-AUG-2017]	MYCOBACTERIUM	AP014547.1	MYCOBACTERIUM ABSCESSUS SUBSP. BOLLETII CCUG 48898 = JCM 15300 DNA, COMPLETE GENOME	MYCOBACTERIUM
-1.39914	KC960671.1	ENTEROBACTERIA PHAGE T3, COMPLETE GENOME	ENTEROBACTERIA	CP003241.1	VIBRIO SP. EJY3 CHROMOSOME 1, COMPLETE SEQUENCE	VIBRIO
-1.37715	KF005317.1	ALTEROMONAS PHAGE VB_AMAP_AD45-P1, COMPLETE GENOME	ALTEROMONAS	NC_018692.1	ALTEROMONAS MACLEODII STR. 'BLACK SEA 11', COMPLETE GENOME	ALTEROMONAS
-1.37738	KF005318.1	ALTEROMONAS PHAGE VB_AMAP_AD45-P3, COMPLETE GENOME. [26-MAY-2017]	ALTEROMONAS	NC_018692.1	ALTEROMONAS MACLEODII STR. 'BLACK SEA 11', COMPLETE GENOME	ALTEROMONAS
-1.37721	KF005319.1	ALTEROMONAS PHAGE VB_AMAP_AD45-P4, COMPLETE GENOME. [26-MAY-2017]	ALTEROMONAS	NC_018692.1	ALTEROMONAS MACLEODII STR. 'BLACK SEA 11', COMPLETE GENOME	ALTEROMONAS
-1.37729	KF005320.1	ALTEROMONAS PHAGE VB_AMAP_AD45-P2, COMPLETE GENOME. [26-MAY-2017]	ALTEROMONAS	NC_018692.1	ALTEROMONAS MACLEODII STR. 'BLACK SEA 11', COMPLETE GENOME	ALTEROMONAS
-1.2969	KF006817.1	MYCOBACTERIUM PHAGE BREENIOME, COMPLETE GENOME. [25-AUG-2017]	MYCOBACTERIUM	CP009914.1	MYCOBACTERIUM SP. VKM AC-1817D, COMPLETE GENOME	MYCOBACTERIUM
-1.35446	KF006818.1	MYCOBACTERIUM PHAGE WANDA, COMPLETE GENOME. [25-AUG-2017]	MYCOBACTERIUM	AP014547.1	MYCOBACTERIUM ABSCESSUS SUBSP. BOLLETII CCUG 48898 = JCM 15300 DNA, COMPLETE GENOME	MYCOBACTERIUM
-1.36964	KF010834.1	PAENIBACILLUS PHAGE PHIIBB_PL23, COMPLETE GENOME. [26-MAY-2017]	PAENIBACILLUS	NC_016584.1	DESULFOSPOROSINUS ORIENTIS DSM 765, COMPLETE GENOME	DESULFOSPOROSINUS
-1.3413	KF017001.1	MYCOBACTERIUM PHAGE LITTLECHERRY, COMPLETE GENOME. [25-AUG-2017]	MYCOBACTERIUM	NC_012490.1	RHODOCOCCUS ERYTHROPOLIS PR4 DNA, COMPLETE GENOME	RHODOCOCCUS
-1.29216	KF017002.1	MYCOBACTERIUM PHAGE CATDAWG, COMPLETE GENOME. [25-AUG-2017]	MYCOBACTERIUM	CP009914.1	MYCOBACTERIUM SP. VKM AC-1817D, COMPLETE GENOME	MYCOBACTERIUM
-1.34651	KF017003.1	MYCOBACTERIUM PHAGE JABBAWOKKIE, COMPLETE GENOME. [26-MAY-2017]	MYCOBACTERIUM	CP009616.1	MYCOBACTERIUM ABSCESSUS STRAIN 4529, COMPLETE GENOME	MYCOBACTERIUM
-1.33954	KF017004.1	MYCOBACTERIOPHAGE VELVETEEN, COMPLETE GENOME. [26-MAY-2017]	MYCOBACTERIUM	AP014547.1	MYCOBACTERIUM ABSCESSUS SUBSP. BOLLETII CCUG 48898 = JCM 15300 DNA, COMPLETE GENOME	MYCOBACTERIUM
-1.34055	KF017005.1	MYCOBACTERIOPHAGE DAENERYS, COMPLETE GENOME. [26-MAY-2017]	MYCOBACTERIUM	CP009408.1	MYCOBACTERIUM ABSCESSUS SUBSP. BOLLETII STRAIN MA 1948, COMPLETE GENOME	MYCOBACTERIUM
-1.30687	KF024721.1	MYCOBACTERIUM PHAGE ANNAL29, COMPLETE GENOME. [25-AUG-2017]	MYCOBACTERIUM	CP003949.1	RHODOCOCCUS OPACUS PD630, COMPLETE GENOME	RHODOCOCCUS
-1.34001	KF024723.1	MYCOBACTERIUM PHAGE HAMULUS, COMPLETE GENOME. [26-MAY-2017]	MYCOBACTERIUM	AP014547.1	MYCOBACTERIUM ABSCESSUS SUBSP. BOLLETII CCUG 48898 = JCM 15300 DNA, COMPLETE GENOME	MYCOBACTERIUM
-1.32393	KF024724.1	MYCOBACTERIUM PHAGE TROUBLE, COMPLETE GENOME. [25-AUG-2017]	MYCOBACTERIUM	NC_016604.1	MYCOBACTERIUM RHODESIAE NBB3, COMPLETE GENOME	MYCOBACTERIUM
-1.3781	KF024725.1	MYCOBACTERIUM PHAGE WHIRLWIND, COMPLETE GENOME. [26-MAY-2017]	MYCOBACTERIUM	NC_015564.1	HOYOSELLA SUBFLAVA DQS3-9A1, COMPLETE GENOME	HOYOSELLA
-1.32448	KF024726.1	MYCOBACTERIUM PHAGE SARFIRE, COMPLETE GENOME. [25-AUG-2017]	MYCOBACTERIUM	NC_016604.1	MYCOBACTERIUM RHODESIAE NBB3, COMPLETE GENOME	MYCOBACTERIUM
-1.36228	KF024728.1	MYCOBACTERIUM PHAGE MUDDY, COMPLETE GENOME. [26-MAY-2017]	MYCOBACTERIUM	NC_015564.1	HOYOSELLA SUBFLAVA DQS3-9A1, COMPLETE GENOME	HOYOSELLA
-1.24324	KF024729.1	MYCOBACTERIUM PHAGE KAYACHO, COMPLETE GENOME. [26-MAY-2017]	MYCOBACTERIUM	NC_016582.1	STREPTOMYCES BINGCHENGGENSIS BCW-1, COMPLETE GENOME	STREPTOMYCES
-1.293	KF024730.1	MYCOBACTERIUM PHAGE DYLAN, COMPLETE GENOME. [25-AUG-2017]	MYCOBACTERIUM	CP009914.1	MYCOBACTERIUM SP. VKM AC-1817D, COMPLETE GENOME	MYCOBACTERIUM
-1.37673	KF024731.1	MYCOBACTERIUM PHAGE CROSSROADS, COMPLETE GENOME. [26-MAY-2017]	MYCOBACTERIUM	NC_015564.1	HOYOSELLA SUBFLAVA DQS3-9A1, COMPLETE GENOME	HOYOSELLA
-1.33218	KF024732.1	MYCOBACTERIUM PHAGE CONTAGION, COMPLETE GENOME. [25-AUG-2017]	MYCOBACTERIUM	AP014547.1	MYCOBACTERIUM ABSCESSUS SUBSP. BOLLETII CCUG 48898 = JCM 15300 DNA, COMPLETE GENOME	MYCOBACTERIUM
-1.29772	KF024734.1	MYCOBACTERIUM PHAGE SHRIMP, COMPLETE GENOME. [25-AUG-2017]	MYCOBACTERIUM	CP009914.1	MYCOBACTERIUM SP. VKM AC-1817D, COMPLETE GENOME	MYCOBACTERIUM
-1.36666	KF055347.1	ESCHERICHIA PHAGE JH2, COMPLETE GENOME. [25-AUG-2017]	ESCHERICHIA	NC_015558.1	STREPTOCOCCUS PARAUBERIS KCTC 11537, COMPLETE GENOME	STREPTOCOCCUS
-1.37284	KF056323.1	HALOARCULA HISPANICA PLEOMORPHIC VIRUS 2, COMPLETE GENOME	HALOARCULA	NC_017459.1	HALOQUADRATUM WALSBYI C23 COMPLETE GENOME	HALOQUADRATUM
-1.34107	KF114874.1	MYCOBACTERIUM PHAGE BOBI, COMPLETE GENOME. [26-MAY-2017]	MYCOBACTERIUM	AP014547.1	MYCOBACTERIUM ABSCESSUS SUBSP. BOLLETII CCUG 48898 = JCM 15300 DNA, COMPLETE GENOME	MYCOBACTERIUM
-1.35355	KF114875.1	MYCOBACTERIUM PHAGE REDNO2, COMPLETE GENOME. [25-AUG-2017]	MYCOBACTERIUM	AP014547.1	MYCOBACTERIUM ABSCESSUS SUBSP. BOLLETII CCUG 48898 = JCM 15300 DNA, COMPLETE GENOME	MYCOBACTERIUM
-1.35768	KF114879.1	LEPTOSPIRA PHAGE LBRZ_5399, COMPLETE GENOME. [26-MAY-2017]	LEPTOSPIRA	AE016823.1	LEPTOSPIRA INTERROGANS SEROVAR COPENHAGENI STR. FIOCRUZ L1-130, CHROMOSOME I, COMPLETE SEQUENCE	LEPTOSPIRA
-1.35808	KF114880.1	LEPTOSPIRA PHAGE LINZ_10, COMPLETE GENOME. [26-MAY-2017]	LEPTOSPIRA	AE016823.1	LEPTOSPIRA INTERROGANS SEROVAR COPENHAGENI STR. FIOCRUZ L1-130, CHROMOSOME I, COMPLETE SEQUENCE	LEPTOSPIRA
-1.36292	KF147891.1	PSEUDOMONAS PHAGE PABG, COMPLETE GENOME. [25-AUG-2017]	PSEUDOMONAS	NC_008009.1	CANDIDATUS KORIBACTER VERSATILIS ELLIN345, COMPLETE GENOME	CANDIDATUS
-1.35484	KF147927.1	OENOCOCCUS PHAGE PHI9805, COMPLETE GENOME. [26-MAY-2017]	OENOCOCCUS	NC_008528.1	OENOCOCCUS OENI PSU-1, COMPLETE GENOME	OENOCOCCUS
-1.39045	KF148055.1	SALMONELLA PHAGE JERSEY, COMPLETE GENOME. [25-AUG-2017]	SALMONELLA	CP007557.1	CITROBACTER FREUNDII CFNIH1, COMPLETE GENOME	CITROBACTER
-1.26195	KF148616.1	CAMPYLOBACTER PHAGE CP8, COMPLETE GENOME. [25-AUG-2017]	CAMPYLOBACTER	CP009933.1	CLOSTRIDIUM SCATOLOGENES STRAIN ATCC 25775, COMPLETE GENOME	CLOSTRIDIUM
-1.37304	KF156338.1	SYNECHOCOCCUS PHAGE S-MBCM7, COMPLETE GENOME. [25-AUG-2017]	SYNECHOCOCCUS	NC_010001.1	LACHNOCLOSTRIDIUM PHYTOFERMENTANS ISDG, COMPLETE GENOME	LACHNOCLOSTRIDIUM
-1.36522	KF156340.1	SYNECHOCOCCUS PHAGE S-MBCM100, COMPLETE GENOME. [25-AUG-2017]	SYNECHOCOCCUS	NC_010001.1	LACHNOCLOSTRIDIUM PHYTOFERMENTANS ISDG, COMPLETE GENOME	LACHNOCLOSTRIDIUM
-1.3533	KF183314.1	OENOCOCCUS PHAGE PHIS11, COMPLETE GENOME. [26-MAY-2017]	OENOCOCCUS	NC_008528.1	OENOCOCCUS OENI PSU-1, COMPLETE GENOME	OENOCOCCUS
-1.35484	KF183315.1	OENOCOCCUS PHAGE PHIS13, COMPLETE GENOME. [26-MAY-2017]	OENOCOCCUS	NC_008528.1	OENOCOCCUS OENI PSU-1, COMPLETE GENOME	OENOCOCCUS
-1.3847	KF188409.1	LACTOBACILLUS PHAGE PHIJB, COMPLETE GENOME. [25-AUG-2017]	LACTOBACILLUS	NC_017469.1	LACTOBACILLUS DELBRUECKII SUBSP. BULGARICUS 2038, COMPLETE GENOME	LACTOBACILLUS
-1.37594	KF188410.1	LACTOBACILLUS PHAGE PHILDB, COMPLETE GENOME. [25-AUG-2017]	LACTOBACILLUS	CP009281.1	PAENIBACILLUS SP. FSL R5-0345, COMPLETE GENOME	PAENIBACILLUS
-1.34457	KF188458.1	BACILLUS PHAGE WIP1, COMPLETE GENOME. [26-MAY-2017]	BACILLUS	CP010577.1	BACILLUS THURINGIENSIS SEROVAR MORRISONI STRAIN BGSC 4AA1, COMPLETE GENOME	BACILLUS
-1.38203	KF192075.1	ESCHERICHIA PHAGE VB_ECOP_PHAPEC5, COMPLETE GENOME. [26-MAY-2017]	ESCHERICHIA	CP009281.1	PAENIBACILLUS SP. FSL R5-0345, COMPLETE GENOME	PAENIBACILLUS
-1.34403	KF208315.1	YERSINIA PHAGE PST, COMPLETE GENOME. [25-AUG-2017]	YERSINIA	NC_021670.1	STAPHYLOCOCCUS AUREUS BMB9393, COMPLETE GENOME	STAPHYLOCOCCUS
-1.36241	KF208639.2	BACILLUS PHAGE TROLL, COMPLETE GENOME. [25-AUG-2017]	BACILLUS	NC_010001.1	LACHNOCLOSTRIDIUM PHYTOFERMENTANS ISDG, COMPLETE GENOME	LACHNOCLOSTRIDIUM
-1.26525	KF279411.1	MYCOBACTERIUM PHAGE ADAWI, COMPLETE GENOME. [26-MAY-2017]	MYCOBACTERIUM	NC_021191.1	ACTINOPLANES SP. N902-109, COMPLETE GENOME	ACTINOPLANES
-1.26197	KF279412.2	MYCOBACTERIUM PHAGE BANE1, COMPLETE GENOME. [26-MAY-2017]	MYCOBACTERIUM	NC_021191.1	ACTINOPLANES SP. N902-109, COMPLETE GENOME	ACTINOPLANES
-1.26193	KF279413.1	MYCOBACTERIUM PHAGE BANE2, COMPLETE GENOME. [26-MAY-2017]	MYCOBACTERIUM	NC_021191.1	ACTINOPLANES SP. N902-109, COMPLETE GENOME	ACTINOPLANES
-1.34083	KF279414.1	MYCOBACTERIUM PHAGE FREDWARD, COMPLETE GENOME. [25-AUG-2017]	MYCOBACTERIUM	NC_012490.1	RHODOCOCCUS ERYTHROPOLIS PR4 DNA, COMPLETE GENOME	RHODOCOCCUS
-1.32435	KF279415.1	MYCOBACTERIUM PHAGE PHROSTYMUG, COMPLETE GENOME. [25-AUG-2017]	MYCOBACTERIUM	NC_016604.1	MYCOBACTERIUM RHODESIAE NBB3, COMPLETE GENOME	MYCOBACTERIUM
-1.33377	KF279417.1	MYCOBACTERIUM PHAGE QUINK, COMPLETE GENOME. [25-AUG-2017]	MYCOBACTERIUM	AP014547.1	MYCOBACTERIUM ABSCESSUS SUBSP. BOLLETII CCUG 48898 = JCM 15300 DNA, COMPLETE GENOME	MYCOBACTERIUM
-1.3171	KF279418.1	MYCOBACTERIUM PHAGE ANUBIS, COMPLETE GENOME. [25-AUG-2017]	MYCOBACTERIUM	NC_015635.1	MICROLUNATUS PHOSPHOVORUS NM-1 DNA, COMPLETE GENOME	MICROLUNATUS
-1.31707	KF279418.2	MYCOBACTERIUM PHAGE ANUBIS, COMPLETE GENOME	MYCOBACTERIUM	NC_015635.1	MICROLUNATUS PHOSPHOVORUS NM-1 DNA, COMPLETE GENOME	MICROLUNATUS
-1.32273	KF296717.1	BACILLUS PHAGE PROCM3, COMPLETE GENOME	BACILLUS	CP010577.1	BACILLUS THURINGIENSIS SEROVAR MORRISONI STRAIN BGSC 4AA1, COMPLETE GENOME	BACILLUS
-1.3054	KF296718.1	BACILLUS PHAGE PHICM3, COMPLETE GENOME	BACILLUS	NC_020238.1	BACILLUS THURINGIENSIS SEROVAR KURSTAKI STR. HD73, COMPLETE GENOME	BACILLUS
-1.34402	KF301602.1	CAULOBACTER PHAGE CR30, COMPLETE GENOME. [25-AUG-2017]	CAULOBACTER	NC_015321.1	FLUVIICOLA TAFFENSIS DSM 16823, COMPLETE GENOME	FLUVIICOLA
-1.35832	KF302032.1	UNVERIFIED: PSEUDOALTEROMONAS PHAGE HS5, COMPLETE GENOME. [27-FEB-2016]	PSEUDOALTEROMONAS	NC_003910.7	COLWELLIA PSYCHRERYTHRAEA 34H, COMPLETE GENOME	COLWELLIA
-1.36058	KF302033.1	UNVERIFIED: PSEUDOALTEROMONAS PHAGE HS1, COMPLETE GENOME. [27-FEB-2016]	PSEUDOALTEROMONAS	NC_020514.1	PARAGLACIECOLA PSYCHROPHILA 170, COMPLETE GENOME	PARAGLACIECOLA
-1.33353	KF306380.1	MYCOBACTERIUM PHAGE DRDREY, COMPLETE GENOME. [25-AUG-2017]	MYCOBACTERIUM	AP014547.1	MYCOBACTERIUM ABSCESSUS SUBSP. BOLLETII CCUG 48898 = JCM 15300 DNA, COMPLETE GENOME	MYCOBACTERIUM
-1.37922	KF319020.1	PROTEUS PHAGE PM16, COMPLETE GENOME. [26-MAY-2017]	PROTEUS	CP010817.1	MYROIDES PROFUNDI STRAIN D25, COMPLETE GENOME	MYROIDES
-1.38287	KF322026.1	VIBRIO PHAGE PHI-A318, COMPLETE GENOME. [25-AUG-2017]	VIBRIO	FM954972.2	VIBRIO SPLENDIDUS LGP32 CHROMOSOME 1	VIBRIO
-1.33122	KF322032.1	ENTEROBACTERIA PHAGE FIAA91-SS, COMPLETE GENOME. [25-AUG-2017]	ENTEROBACTERIA	NC_016822.1	SHIGELLA SONNEI 53G MAIN CHROMOSOME, COMPLETE GENOME	SHIGELLA
-1.38498	KF356198.1	ANABAENA PHAGE A-4L, COMPLETE GENOME. [26-MAY-2017]	ANABAENA	NC_003272.1	NOSTOC SP. PCC 7120 DNA, COMPLETE GENOME	NOSTOC
-1.39735	KF356199.1	MICROCYSTIS PHAGE MAMV-DC, COMPLETE GENOME. [25-AUG-2017]	MICROCYSTIS	NC_007984.1	BAUMANNIA CICADELLINICOLA STR. HC (HOMALODISCA COAGULATA), COMPLETE GENOME	BAUMANNIA
-1.32448	KF361475.1	VIBRIO PHAGE VPUSM 8, COMPLETE GENOME. [25-AUG-2017]	VIBRIO	CP001236.1	VIBRIO CHOLERAE O395 CHROMOSOME II, COMPLETE SEQUENCE	VIBRIO
-1.37118	KF381361.1	SINORHIZOBIUM PHAGE PHIM12, COMPLETE GENOME. [25-AUG-2017]	SINORHIZOBIUM	CP000758.1	OCHROBACTRUM ANTHROPI ATCC 49188 CHROMOSOME 1, COMPLETE SEQUENCE	OCHROBACTRUM
-1.32767	KF416340.1	MYCOBACTERIOPHAGE WHEELER, COMPLETE GENOME. [25-AUG-2017]	MYCOBACTERIUM	NC_016604.1	MYCOBACTERIUM RHODESIAE NBB3, COMPLETE GENOME	MYCOBACTERIUM
-1.26428	KF416341.1	MYOBACTERIOPHAGE PHELEMICH, COMPLETE GENOME. [26-MAY-2017]	MYCOBACTERIUM	NC_008726.1	MYCOBACTERIUM VANBAALENII PYR-1, COMPLETE GENOME	MYCOBACTERIUM
-1.38538	KF416342.1	MYOBACTERIOPHAGE PAPYRUS, COMPLETE GENOME. [26-MAY-2017]	MYCOBACTERIUM	CP007152.1	MARINOBACTER SALARIUS STRAIN R9SW1, COMPLETE GENOME	MARINOBACTER
-1.33406	KF416343.1	MYOBACTERIOPHAGE GOKU, COMPLETE GENOME. [25-AUG-2017]	MYCOBACTERIUM	AP014547.1	MYCOBACTERIUM ABSCESSUS SUBSP. BOLLETII CCUG 48898 = JCM 15300 DNA, COMPLETE GENOME	MYCOBACTERIUM
-1.32518	KF416344.1	MYCOBACTERIUM PHAGE ADZZY, COMPLETE GENOME. [25-AUG-2017]	MYCOBACTERIUM	NC_022115.1	RHODOCOCCUS ERYTHROPOLIS CCM2595, COMPLETE GENOME	RHODOCOCCUS
-1.27085	KF493879.1	MYCOBACTERIUM PHAGE BERNARDO, COMPLETE GENOME. [26-MAY-2017]	MYCOBACTERIUM	CP007219.1	AMYCOLATOPSIS LURIDA NRRL 2430, COMPLETE GENOME	AMYCOLATOPSIS
-1.32224	KF493880.1	MYCOBACTERIUM PHAGE HANSHOTFIRST, COMPLETE GENOME. [25-AUG-2017]	MYCOBACTERIUM	CP009914.1	MYCOBACTERIUM SP. VKM AC-1817D, COMPLETE GENOME	MYCOBACTERIUM
-1.2655	KF493881.1	MYCOBACTERIUM PHAGE JAMAL, COMPLETE GENOME. [26-MAY-2017]	MYCOBACTERIUM	NC_021191.1	ACTINOPLANES SP. N902-109, COMPLETE GENOME	ACTINOPLANES
-1.34221	KF493882.1	MYCOBACTERIUM PHAGE JOVO, COMPLETE GENOME. [25-AUG-2017]	MYCOBACTERIUM	NC_012490.1	RHODOCOCCUS ERYTHROPOLIS PR4 DNA, COMPLETE GENOME	RHODOCOCCUS
-1.37728	KF534715.1	PECTOBACTERIUM PHAGE PM1, COMPLETE GENOME. [26-MAY-2017]	PECTOBACTERIUM	CP003241.1	VIBRIO SP. EJY3 CHROMOSOME 1, COMPLETE SEQUENCE	VIBRIO
-1.38627	KF550303.1	ENTEROBACTERIA PHAGE 4MG, COMPLETE GENOME. [25-AUG-2017]	ENTEROBACTERIA	NC_020304.1	DESULFOCAPSA SULFEXIGENS DSM 10523, COMPLETE GENOME	DESULFOCAPSA
-1.37627	KF554508.2	BACILLUS PHAGE CP-51, COMPLETE GENOME. [25-AUG-2017]	BACILLUS	CP010817.1	MYROIDES PROFUNDI STRAIN D25, COMPLETE GENOME	MYROIDES
-1.34395	KF560330.1	MYCOBACTERIUM PHAGE CONSPIRACY, COMPLETE GENOME. [25-AUG-2017]	MYCOBACTERIUM	NC_012490.1	RHODOCOCCUS ERYTHROPOLIS PR4 DNA, COMPLETE GENOME	RHODOCOCCUS
-1.32592	KF560331.1	MYCOBACTERIUM PHAGE GRADUATION, COMPLETE GENOME. [25-AUG-2017]	MYCOBACTERIUM	CP009914.1	MYCOBACTERIUM SP. VKM AC-1817D, COMPLETE GENOME	MYCOBACTERIUM
-1.33737	KF560332.1	MYCOBACTERIUM PHAGE CLOUDWANG3, COMPLETE GENOME. [25-AUG-2017]	MYCOBACTERIUM	NC_012490.1	RHODOCOCCUS ERYTHROPOLIS PR4 DNA, COMPLETE GENOME	RHODOCOCCUS
-1.33739	KF560333.1	MYCOBACTERIUM PHAGE ARTEMIS2UCLA, COMPLETE GENOME. [25-AUG-2017]	MYCOBACTERIUM	NC_012490.1	RHODOCOCCUS ERYTHROPOLIS PR4 DNA, COMPLETE GENOME	RHODOCOCCUS
-1.3356	KF560334.1	MYCOBACTERIUM PHAGE ZAKA, COMPLETE GENOME. [25-AUG-2017]	MYCOBACTERIUM	NC_012490.1	RHODOCOCCUS ERYTHROPOLIS PR4 DNA, COMPLETE GENOME	RHODOCOCCUS
-1.33258	KF562099.1	MYCOBACTERIUM PHAGE BRUIN, COMPLETE GENOME. [25-AUG-2017]	MYCOBACTERIUM	CP009615.1	MYCOBACTERIUM ABSCESSUS STRAIN DJO-44274, COMPLETE GENOME	MYCOBACTERIUM
-1.33248	KF562100.1	MYCOBACTERIUM PHAGE HUFFLYPUFF, COMPLETE GENOME. [25-AUG-2017]	MYCOBACTERIUM	AP014547.1	MYCOBACTERIUM ABSCESSUS SUBSP. BOLLETII CCUG 48898 = JCM 15300 DNA, COMPLETE GENOME	MYCOBACTERIUM
-1.33265	KF562101.1	MYCOBACTERIUM PHAGE NALA, COMPLETE GENOME. [25-AUG-2017]	MYCOBACTERIUM	AP014547.1	MYCOBACTERIUM ABSCESSUS SUBSP. BOLLETII CCUG 48898 = JCM 15300 DNA, COMPLETE GENOME	MYCOBACTERIUM
-1.33325	KF562102.1	MYCOBACTERIUM PHAGE PHATBACTER, COMPLETE GENOME. [25-AUG-2017]	MYCOBACTERIUM	NC_018150.2	MYCOBACTERIUM ABSCESSUS SUBSP. MASSILIENSE STR. GO 06, COMPLETE GENOME	MYCOBACTERIUM
-1.38213	KF562340.1	ESCHERICHIA PHAGE VB_ECOP_PHAPEC7, COMPLETE GENOME. [26-MAY-2017]	ESCHERICHIA	CP009281.1	PAENIBACILLUS SP. FSL R5-0345, COMPLETE GENOME	PAENIBACILLUS
-1.36162	KF562341.1	ESCHERICHIA PHAGE VB_ECOM_PHAPEC2, COMPLETE GENOME. [25-AUG-2017]	ESCHERICHIA	CP009278.1	SPHINGOBACTERIUM SP. ML3W, COMPLETE GENOME	SPHINGOBACTERIUM
-1.39033	KF562864.1	SALMONELLA PHAGE SETP13, COMPLETE GENOME. [25-AUG-2017]	SALMONELLA	NC_012125.1	SALMONELLA ENTERICA SUBSP. ENTERICA SEROVAR PARATYPHI C STRAIN RKS4594, COMPLETE GENOME	SALMONELLA
-1.39154	KF562865.1	SALMONELLA PHAGE SETP7, COMPLETE GENOME. [25-AUG-2017]	SALMONELLA	NC_021870.1	SALMONELLA BONGORI N268-08, COMPLETE GENOME	SALMONELLA
-1.36149	KF582788.2	ESCHERICHIA PHAGE VB_ECOM_JS09, COMPLETE GENOME. [25-AUG-2017]	ESCHERICHIA	NC_017770.1	SOLITALEA CANADENSIS DSM 3403, COMPLETE GENOME	SOLITALEA
-1.33652	KF589919.1	STAPHYLOCOCCUS PHAGE PHIRS7, COMPLETE GENOME. [25-AUG-2017]	STAPHYLOCOCCUS	NC_009632.1	STAPHYLOCOCCUS AUREUS SUBSP. AUREUS JH1, COMPLETE GENOME	STAPHYLOCOCCUS
-1.29726	KF598856.1	STAPHYLOCOCCUS PHAGE YMC/09/04/R1988, COMPLETE GENOME. [26-MAY-2017]	STAPHYLOCOCCUS	NC_009632.1	STAPHYLOCOCCUS AUREUS SUBSP. AUREUS JH1, COMPLETE GENOME	STAPHYLOCOCCUS
-1.38881	KF598865.1	CYANOPHAGE PP, COMPLETE GENOME. [26-MAY-2017]	CYANOPHAGE	FM954972.2	VIBRIO SPLENDIDUS LGP32 CHROMOSOME 1	VIBRIO
-1.34247	KF614509.1	RHIZOBIUM PHAGE VB_RLES_L338C, COMPLETE GENOME. [26-MAY-2017]	RHIZOBIUM	FO082820.1	RHIZOBIUM SP. NT-26 CHROMOSOME, COMPLETE GENOME	RHIZOBIUM
-1.38054	KF620435.1	SHIGELLA PHAGE PSB-1, COMPLETE GENOME. [25-AUG-2017]	SHIGELLA	CP009279.1	PAENIBACILLUS SP. FSL H7-0737, COMPLETE GENOME	PAENIBACILLUS
-1.38207	KF623293.1	VIBRIO PHAGE SHOU24, COMPLETE GENOME. [24-FEB-2017]	VIBRIO	CP001805.1	VIBRIO ANTIQUARIUS STRAIN EX25 CHROMOSOME 1, COMPLETE SEQUENCE	VIBRIO
-1.38526	KF623294.1	ERWINIA PHAGE PHIEAH1, COMPLETE GENOME	ERWINIA	CP006580.1	ENTEROBACTER CLOACAE P101, COMPLETE GENOME	ENTEROBACTER
-1.3448	KF626666.1	XYLELLA PHAGE PAZ, COMPLETE GENOME. [26-MAY-2017]	XYLELLA	NC_018014.1	TERRIGLOBUS ROSEUS DSM 18391, COMPLETE GENOME	TERRIGLOBUS
-1.31892	KF626667.1	XYLELLA PHAGE PRADO, COMPLETE GENOME. [26-MAY-2017]	XYLELLA	CP007444.1	DYELLA JIANGNINGENSIS STRAIN SBZ 3-12, COMPLETE GENOME	DYELLA
-1.33553	KF664566.1	VIBRIO PHAGE CTX RSTR (RSTR), RSTA (RSTA), RSTB (RSTB), RSTC (RSTC), RSTR (RSTR), RSTA (RSTA), RSTB (RSTB), CEP (CEP), ORFU (ORFU), ACE (ACE), ZOT (ZOT), CTXA (CTXA), CTXB (CTXB), RSTR (RSTR), RSTA (RSTA), RSTB	VIBRIO	CP000626.1	VIBRIO CHOLERAE O395 CHROMOSOME 1, COMPLETE GENOME	VIBRIO
-1.31679	KF664567.1	VIBRIO PHAGE CTX PLASMID PCTX-2 RSTR (RSTR), RSTA (RSTA), RSTB (RSTB), CEP (CEP), ORFU (ORFU), ACE (ACE), ZOT (ZOT), CTXA (CTXA), CTXB (CTXB), RSTR (RSTR), RSTA (RSTA), RSTB (RSTB), CEP (CEP), ORFU (ORFU), ACE	VIBRIO	CP000626.1	VIBRIO CHOLERAE O395 CHROMOSOME 1, COMPLETE GENOME	VIBRIO
-1.33417	KF664568.1	VIBRIO PHAGE CTX ISOLATE RECOMBINANT CTX-RS1 PLASMID PCTX-1 RSTR (RSTR), RSTA (RSTA), RSTB (RSTB), CEP (CEP), ORFU (ORFU), ACE (ACE), ZOT (ZOT), CTXA (CTXA), CTXB (CTXB), RSTR (RSTR), RSTA (RSTA), RSTB (RSTB), AND RSTC	VIBRIO	CP000626.1	VIBRIO CHOLERAE O395 CHROMOSOME 1, COMPLETE GENOME	VIBRIO
-1.3628	KF669647.1	BACILLUS PHAGE BIGBERTHA, COMPLETE GENOME. [25-AUG-2017]	BACILLUS	NC_010001.1	LACHNOCLOSTRIDIUM PHYTOFERMENTANS ISDG, COMPLETE GENOME	LACHNOCLOSTRIDIUM
-1.38299	KF669648.1	BACILLUS PHAGE BLASTOID, COMPLETE GENOME. [25-AUG-2017]	BACILLUS	CP009279.1	PAENIBACILLUS SP. FSL H7-0737, COMPLETE GENOME	PAENIBACILLUS
-1.37317	KF669649.1	BACILLUS PHAGE CAMPHAWK, COMPLETE GENOME. [25-AUG-2017]	BACILLUS	NC_009633.1	ALKALIPHILUS METALLIREDIGENS QYMF, COMPLETE GENOME	ALKALIPHILUS
-1.34457	KF669650.1	CLAVIBACTER PHAGE CN1A, COMPLETE GENOME. [26-MAY-2017]	CLAVIBACTER	CP007156.1	CORYNEBACTERIUM FALSENII DSM 44353 STRAIN BL 8171, COMPLETE GENOME	CORYNEBACTERIUM
-1.38435	KF669651.1	BACILLUS PHAGE GLITTERING, COMPLETE GENOME. [25-AUG-2017]	BACILLUS	CP010976.1	PAENIBACILLUS SP. IHBB 10380, COMPLETE GENOME	PAENIBACILLUS
-1.38376	KF669652.1	BACILLUS PHAGE GRASS, COMPLETE GENOME. [26-MAY-2017]	BACILLUS	CP009281.1	PAENIBACILLUS SP. FSL R5-0345, COMPLETE GENOME	PAENIBACILLUS
-1.38577	KF669653.1	SALMONELLA PHAGE MARSHALL, COMPLETE GENOME. [25-AUG-2017]	SALMONELLA	CP009281.1	PAENIBACILLUS SP. FSL R5-0345, COMPLETE GENOME	PAENIBACILLUS
-1.38528	KF669654.1	SALMONELLA PHAGE MAYNARD, COMPLETE GENOME. [25-AUG-2017]	SALMONELLA	CP009281.1	PAENIBACILLUS SP. FSL R5-0345, COMPLETE GENOME	PAENIBACILLUS
-1.36413	KF669655.1	BACILLUS PHAGE PAGE, COMPLETE GENOME. [25-AUG-2017]	BACILLUS	CP009920.1	BACILLUS MEGATERIUM NBRC 15308 = ATCC 14581, COMPLETE GENOME	BACILLUS
-1.35949	KF669658.1	ACINETOBACTER PHAGE PRESLEY, COMPLETE GENOME. [26-MAY-2017]	ACINETOBACTER	CP010817.1	MYROIDES PROFUNDI STRAIN D25, COMPLETE GENOME	MYROIDES
-1.38139	KF669659.1	BACILLUS PHAGE RIGGI, COMPLETE GENOME. [25-AUG-2017]	BACILLUS	CP007041.1	STREPTOCOCCUS PYOGENES STAB902, COMPLETE GENOME	STREPTOCOCCUS
-1.3629	KF669660.1	BACILLUS PHAGE PONY, COMPLETE GENOME. [25-AUG-2017]	BACILLUS	CP009920.1	BACILLUS MEGATERIUM NBRC 15308 = ATCC 14581, COMPLETE GENOME	BACILLUS
-1.3386	KF669661.1	BACILLUS PHAGE SLASH, COMPLETE GENOME. [26-MAY-2017]	BACILLUS	NC_018500.1	BACILLUS THURINGIENSIS HD-771, COMPLETE GENOME	BACILLUS
-1.36096	KF669662.1	BACILLUS PHAGE SPOCK, COMPLETE GENOME. [25-AUG-2017]	BACILLUS	NC_010001.1	LACHNOCLOSTRIDIUM PHYTOFERMENTANS ISDG, COMPLETE GENOME	LACHNOCLOSTRIDIUM
-1.33933	KF669663.1	BACILLUS PHAGE STALEY, COMPLETE GENOME. [26-MAY-2017]	BACILLUS	NC_018500.1	BACILLUS THURINGIENSIS HD-771, COMPLETE GENOME	BACILLUS
-1.34046	KF676640.1	LACTOCOCCUS PHAGE SK1833, COMPLETE GENOME. [25-AUG-2017]	LACTOCOCCUS	NC_014393.1	CLOSTRIDIUM CELLULOVORANS 743B, COMPLETE GENOME	CLOSTRIDIUM
-1.3393	KF692088.2	ARTHROBACTER PHAGE VB_ARS-ARV2, COMPLETE GENOME. [26-MAY-2017]	ARTHROBACTER	NC_008711.1	PAENARTHROBACTER AURESCENS TC1, COMPLETE GENOME	PAENARTHROBACTER
-1.39482	KF700371.1	ERWINIA PHAGE FE44, COMPLETE GENOME. [25-AUG-2017]	ERWINIA	CP002122.1	PREVOTELLA MELANINOGENICA ATCC 25845 CHROMOSOME I, COMPLETE SEQUENCE	PREVOTELLA
-1.28122	KF713485.1	MYCOBACTERIUM PHAGE SUFFOLK, COMPLETE GENOME. [26-MAY-2017]	MYCOBACTERIUM	NC_018289.1	MYCOBACTERIUM SMEGMATIS STR. MC2 155, COMPLETE GENOME	MYCOBACTERIUM
-1.27007	KF713486.1	MYCOBACTERIUM PHAGE VALIDUS, COMPLETE GENOME. [26-MAY-2017]	MYCOBACTERIUM	NC_018289.1	MYCOBACTERIUM SMEGMATIS STR. MC2 155, COMPLETE GENOME	MYCOBACTERIUM
-1.33522	KF728385.2	ENTEROCOCCUS PHAGE IME_EF3, COMPLETE GENOME. [25-AUG-2017]	ENTEROCOCCUS	CP007447.1	STAPHYLOCOCCUS AUREUS STRAIN XN108, COMPLETE GENOME	STAPHYLOCOCCUS
-1.33529	KF733017.1	ENTEROCOCCUS PHAGE IME-EF4, COMPLETE GENOME. [25-AUG-2017]	ENTEROCOCCUS	CP007208.1	STAPHYLOCOCCUS XYLOSUS STRAIN HKUOPL8, COMPLETE GENOME	STAPHYLOCOCCUS
-1.3981	KF765493.2	KLEBSIELLA PHAGE F19, COMPLETE GENOME. [25-AUG-2017]	KLEBSIELLA	CP009280.1	PAENIBACILLUS SP. FSL P4-0081, COMPLETE GENOME	PAENIBACILLUS
-1.30208	KF766114.1	STAPHYLOCOCCUS PHAGE K, COMPLETE GENOME. [25-AUG-2017]	STAPHYLOCOCCUS	FN665652.1	CLOSTRIDIUM DIFFICILE COMPLETE GENOME, STRAIN CF5	CLOSTRIDIUM
-1.3504	KF766125.2	SHIGELLA PHAGE 75/02 STX, COMPLETE GENOME. [25-AUG-2017]	SHIGELLA	NC_002695.1	ESCHERICHIA COLI O157:H7 STR. SAKAI, COMPLETE GENOME	ESCHERICHIA
-1.27299	KF767351.1	LACTOBACILLUS PHAGE PHI JLB1, COMPLETE GENOME. [25-AUG-2017]	LACTOBACILLUS	NC_008530.1	LACTOBACILLUS GASSERI ATCC 33323, COMPLETE GENOME	LACTOBACILLUS
-1.37911	KF771237.1	ESCHERICHIA PHAGE BV_ECOS_AHP42, COMPLETE GENOME. [25-AUG-2017]	ESCHERICHIA	NC_013166.1	KANGIELLA KOREENSIS DSM 16069, COMPLETE GENOME	KANGIELLA
-1.37878	KF771238.1	ESCHERICHIA PHAGE BV_ECOS_AHS24, COMPLETE GENOME. [25-AUG-2017]	ESCHERICHIA	NC_013166.1	KANGIELLA KOREENSIS DSM 16069, COMPLETE GENOME	KANGIELLA
-1.37824	KF771239.1	ESCHERICHIA PHAGE BV_ECOS_AKS96, COMPLETE GENOME. [25-AUG-2017]	ESCHERICHIA	NC_013166.1	KANGIELLA KOREENSIS DSM 16069, COMPLETE GENOME	KANGIELLA
-1.37292	KF772233.1	EDWARDSIELLA PHAGE EIAU, COMPLETE GENOME. [25-AUG-2017]	EDWARDSIELLA	NC_021741.1	SERRATIA LIQUEFACIENS ATCC 27592, COMPLETE GENOME	SERRATIA
-1.37288	KF772234.1	EDWARDSIELLA PHAGE EIAU-183, COMPLETE GENOME. [25-AUG-2017]	EDWARDSIELLA	NC_021741.1	SERRATIA LIQUEFACIENS ATCC 27592, COMPLETE GENOME	SERRATIA
-1.37014	KF787095.1	ACHROMOBACTER PHAGE JWALPHA, COMPLETE GENOME. [26-MAY-2017]	ACHROMOBACTER	CP007152.1	MARINOBACTER SALARIUS STRAIN R9SW1, COMPLETE GENOME	MARINOBACTER
-1.38278	KF800937.1	VIBRIO PHAGE AS51, COMPLETE GENOME. [25-AUG-2017]	VIBRIO	FM954972.2	VIBRIO SPLENDIDUS LGP32 CHROMOSOME 1	VIBRIO
-1.37855	KF806588.1	ERWINIA PHAGE EA9-2, COMPLETE GENOME. [25-AUG-2017]	ERWINIA	CP007142.1	GYNUELLA SUNSHINYII YC6258, COMPLETE GENOME	GYNUELLA
-1.38256	KF806589.1	ERWINIA PHAGE EA35-70, COMPLETE GENOME. [26-MAY-2017]	ERWINIA	CP007142.1	GYNUELLA SUNSHINYII YC6258, COMPLETE GENOME	GYNUELLA
-1.37763	KF811200.1	ACINETOBACTER PHAGE IME_AB3, COMPLETE GENOME. [26-MAY-2017]	ACINETOBACTER	NC_016041.1	GLACIECOLA NITRATIREDUCENS FR1064, COMPLETE GENOME	GLACIECOLA
-1.28925	KF831354.1	STAPHYLOCOCCUS PHAGE PHIBU01, COMPLETE GENOME. [25-AUG-2017]	STAPHYLOCOCCUS	CP011147.1	STAPHYLOCOCCUS AUREUS STRAIN FCFHV36, COMPLETE GENOME	STAPHYLOCOCCUS
-1.34096	KF835987.1	PECTOBACTERIUM BACTERIOPHAGE PM2, COMPLETE GENOME. [25-AUG-2017]	PECTOBACTERIUM	AP014583.1	WINOGRADSKYELLA SP. PG-2 DNA, COMPLETE GENOME	WINOGRADSKYELLA
-1.32107	KF841475.1	MYCOBACTERIUM PHAGE BELLUSTERRA, COMPLETE GENOME. [25-AUG-2017]	MYCOBACTERIUM	NC_016604.1	MYCOBACTERIUM RHODESIAE NBB3, COMPLETE GENOME	MYCOBACTERIUM
-1.27195	KF841477.1	MYCOBACTERIUM PHAGE DONOVAN, COMPLETE GENOME. [26-MAY-2017]	MYCOBACTERIUM	NC_018289.1	MYCOBACTERIUM SMEGMATIS STR. MC2 155, COMPLETE GENOME	MYCOBACTERIUM
-1.33725	KF861510.1	MYCOBACTERIUM PHAGE EAGLEEYE, COMPLETE GENOME. [25-AUG-2017]	MYCOBACTERIUM	NC_012490.1	RHODOCOCCUS ERYTHROPOLIS PR4 DNA, COMPLETE GENOME	RHODOCOCCUS
-1.3449	KF925357.1	ESCHERICHIA PHAGE HY01, COMPLETE GENOME. [25-AUG-2017]	ESCHERICHIA	CP007447.1	STAPHYLOCOCCUS AUREUS STRAIN XN108, COMPLETE GENOME	STAPHYLOCOCCUS
-1.32596	KF926093.1	LACTOCOCCUS PHAGE PHIL47, COMPLETE GENOME. [25-AUG-2017]	LACTOCOCCUS	NC_014393.1	CLOSTRIDIUM CELLULOVORANS 743B, COMPLETE GENOME	CLOSTRIDIUM
-1.29641	KF929199.1	STAPHYLOCOCCUS PHAGE VB_SEPS_SEP9, COMPLETE GENOME. [25-AUG-2017]	STAPHYLOCOCCUS	FN665652.1	CLOSTRIDIUM DIFFICILE COMPLETE GENOME, STRAIN CF5	CLOSTRIDIUM
-1.32162	KF954506.1	MYCOBACTERIUM PHAGE NYXIS, COMPLETE GENOME. [25-AUG-2017]	MYCOBACTERIUM	NC_016604.1	MYCOBACTERIUM RHODESIAE NBB3, COMPLETE GENOME	MYCOBACTERIUM
-1.32075	KF959563.1	MYCOBACTERIUM PHAGE OBAMA12, COMPLETE GENOME. [25-AUG-2017]	MYCOBACTERIUM	NC_016604.1	MYCOBACTERIUM RHODESIAE NBB3, COMPLETE GENOME	MYCOBACTERIUM
-1.37368	KF977490.1	RHIZOBIUM PHAGE VB_RGLS_P106B, COMPLETE GENOME. [25-AUG-2017]	RHIZOBIUM	NC_015660.1	PARAGEOBACILLUS THERMOGLUCOSIDASIUS C56-YS93, COMPLETE GENOME	PARAGEOBACILLUS
-1.31328	KF981601.1	MYCOBACTERIUM PHAGE ECHILD, COMPLETE GENOME. [25-AUG-2017]	MYCOBACTERIUM	NC_016604.1	MYCOBACTERIUM RHODESIAE NBB3, COMPLETE GENOME	MYCOBACTERIUM
-1.37941	KF981730.1	ESCHERICHIA PHAGE KBNP1711, COMPLETE GENOME. [25-AUG-2017]	ESCHERICHIA	CP009279.1	PAENIBACILLUS SP. FSL H7-0737, COMPLETE GENOME	PAENIBACILLUS
-1.36347	KF981875.1	PSEUDOMONAS PHAGE SPM-1, COMPLETE GENOME. [25-AUG-2017]	PSEUDOMONAS	NC_008009.1	CANDIDATUS KORIBACTER VERSATILIS ELLIN345, COMPLETE GENOME	CANDIDATUS
-1.33587	KF981876.1	UNVERIFIED: MYCOBACTERIUM PHAGE ADLER F1725, COMPLETE GENOME. [25-AUG-2017]	MYCOBACTERIUM	AP014547.1	MYCOBACTERIUM ABSCESSUS SUBSP. BOLLETII CCUG 48898 = JCM 15300 DNA, COMPLETE GENOME	MYCOBACTERIUM
-1.28502	KF986246.1	MYCOBACTERIUM PHAGE MICHELLEMYBELL, COMPLETE GENOME. [25-AUG-2017]	MYCOBACTERIUM	CP009496.1	MYCOBACTERIUM SMEGMATIS STRAIN INHR2, COMPLETE GENOME	MYCOBACTERIUM
-1.35215	KF986247.1	MYCOBACTERIUM PHAGE OAKER, COMPLETE GENOME. [26-MAY-2017]	MYCOBACTERIUM	NC_008009.1	CANDIDATUS KORIBACTER VERSATILIS ELLIN345, COMPLETE GENOME	CANDIDATUS
-1.35606	KJ000058.2	SALMONELLA PHAGE STP4-A, COMPLETE GENOME. [25-AUG-2017]	SALMONELLA	NC_017770.1	SOLITALEA CANADENSIS DSM 3403, COMPLETE GENOME	SOLITALEA
-1.39859	KJ002054.2	SHEWANELLA PHAGE SPP001, COMPLETE GENOME. [26-MAY-2017]	SHEWANELLA	FM954972.2	VIBRIO SPLENDIDUS LGP32 CHROMOSOME 1	VIBRIO
-1.34365	KJ010489.1	ENTEROCOCCUS PHAGE IME-EFM1, COMPLETE GENOME. [25-AUG-2017]	ENTEROCOCCUS	CP007208.1	STAPHYLOCOCCUS XYLOSUS STRAIN HKUOPL8, COMPLETE GENOME	STAPHYLOCOCCUS
-1.37976	KJ010547.1	BACILLUS PHAGE BP8P-C, COMPLETE GENOME. [26-MAY-2017]	BACILLUS	CP010976.1	PAENIBACILLUS SP. IHBB 10380, COMPLETE GENOME	PAENIBACILLUS
-1.36244	KJ018209.1	SHEWANELLA SP. PHAGE 1/4, COMPLETE GENOME. [25-AUG-2017]	SHEWANELLA	CP010817.1	MYROIDES PROFUNDI STRAIN D25, COMPLETE GENOME	MYROIDES
-1.36174	KJ018211.1	SHEWANELLA SP. PHAGE 1/40, COMPLETE GENOME. [25-AUG-2017]	SHEWANELLA	CP010817.1	MYROIDES PROFUNDI STRAIN D25, COMPLETE GENOME	MYROIDES
-1.36249	KJ018212.1	SHEWANELLA SP. PHAGE 1/41, COMPLETE GENOME. [25-AUG-2017]	SHEWANELLA	NC_011566.1	SHEWANELLA PIEZOTOLERANS WP3, COMPLETE GENOME	SHEWANELLA
-1.3581	KJ018213.1	SHEWANELLA SP. PHAGE 1/44, COMPLETE GENOME. [26-MAY-2017]	SHEWANELLA	NC_003910.7	COLWELLIA PSYCHRERYTHRAEA 34H, COMPLETE GENOME	COLWELLIA
-1.3666	KJ018214.1	SHEWANELLA SP. PHAGE 3/49, COMPLETE GENOME. [26-MAY-2017]	SHEWANELLA	NC_008345.1	SHEWANELLA FRIGIDIMARINA NCIMB 400, COMPLETE GENOME	SHEWANELLA
-1.36494	KJ019026.1	SYNECHOCOCCUS PHAGE ACG-2014A ISOLATE SYN7803C42, COMPLETE GENOME. [25-AUG-2017]	SYNECHOCOCCUS	NC_010001.1	LACHNOCLOSTRIDIUM PHYTOFERMENTANS ISDG, COMPLETE GENOME	LACHNOCLOSTRIDIUM
-1.37289	KJ019028.1	SYNECHOCOCCUS PHAGE ACG-2014D ISOLATE SYN7803C45, COMPLETE GENOME. [25-AUG-2017]	SYNECHOCOCCUS	NC_010001.1	LACHNOCLOSTRIDIUM PHYTOFERMENTANS ISDG, COMPLETE GENOME	LACHNOCLOSTRIDIUM
-1.36514	KJ019033.1	SYNECHOCOCCUS PHAGE ACG-2014A ISOLATE SYN7803C53, COMPLETE GENOME. [25-AUG-2017]	SYNECHOCOCCUS	NC_010001.1	LACHNOCLOSTRIDIUM PHYTOFERMENTANS ISDG, COMPLETE GENOME	LACHNOCLOSTRIDIUM
-1.37239	KJ019035.1	SYNECHOCOCCUS PHAGE ACG-2014D ISOLATE SYN7803C55, COMPLETE GENOME. [25-AUG-2017]	SYNECHOCOCCUS	NC_010001.1	LACHNOCLOSTRIDIUM PHYTOFERMENTANS ISDG, COMPLETE GENOME	LACHNOCLOSTRIDIUM
-1.37292	KJ019036.1	SYNECHOCOCCUS PHAGE ACG-2014D ISOLATE SYN7803C57, COMPLETE GENOME. [25-AUG-2017]	SYNECHOCOCCUS	NC_010001.1	LACHNOCLOSTRIDIUM PHYTOFERMENTANS ISDG, COMPLETE GENOME	LACHNOCLOSTRIDIUM
-1.36498	KJ019039.1	SYNECHOCOCCUS PHAGE ACG-2014A ISOLATE SYN7803C60, COMPLETE GENOME. [25-AUG-2017]	SYNECHOCOCCUS	NC_010001.1	LACHNOCLOSTRIDIUM PHYTOFERMENTANS ISDG, COMPLETE GENOME	LACHNOCLOSTRIDIUM
-1.36504	KJ019040.1	SYNECHOCOCCUS PHAGE ACG-2014B ISOLATE SYN7803C61, COMPLETE GENOME. [25-AUG-2017]	SYNECHOCOCCUS	NC_010001.1	LACHNOCLOSTRIDIUM PHYTOFERMENTANS ISDG, COMPLETE GENOME	LACHNOCLOSTRIDIUM
-1.36397	KJ019043.1	SYNECHOCOCCUS PHAGE ACG-2014B ISOLATE SYN7803C68, COMPLETE GENOME. [25-AUG-2017]	SYNECHOCOCCUS	NC_010001.1	LACHNOCLOSTRIDIUM PHYTOFERMENTANS ISDG, COMPLETE GENOME	LACHNOCLOSTRIDIUM
-1.364	KJ019044.1	SYNECHOCOCCUS PHAGE ACG-2014B ISOLATE SYN7803C69, COMPLETE GENOME. [25-AUG-2017]	SYNECHOCOCCUS	NC_010001.1	LACHNOCLOSTRIDIUM PHYTOFERMENTANS ISDG, COMPLETE GENOME	LACHNOCLOSTRIDIUM
-1.38291	KJ019045.1	SYNECHOCOCCUS PHAGE ACG-2014F ISOLATE SYN7803C6, COMPLETE GENOME. [25-AUG-2017]	SYNECHOCOCCUS	NC_010001.1	LACHNOCLOSTRIDIUM PHYTOFERMENTANS ISDG, COMPLETE GENOME	LACHNOCLOSTRIDIUM
-1.37297	KJ019046.1	SYNECHOCOCCUS PHAGE ACG-2014D ISOLATE SYN7803C72, COMPLETE GENOME. [25-AUG-2017]	SYNECHOCOCCUS	NC_010001.1	LACHNOCLOSTRIDIUM PHYTOFERMENTANS ISDG, COMPLETE GENOME	LACHNOCLOSTRIDIUM
-1.36396	KJ019049.1	SYNECHOCOCCUS PHAGE ACG-2014B ISOLATE SYN7803C76, COMPLETE GENOME. [25-AUG-2017]	SYNECHOCOCCUS	NC_010001.1	LACHNOCLOSTRIDIUM PHYTOFERMENTANS ISDG, COMPLETE GENOME	LACHNOCLOSTRIDIUM
-1.36395	KJ019051.1	SYNECHOCOCCUS PHAGE ACG-2014B ISOLATE SYN7803C78, COMPLETE GENOME. [25-AUG-2017]	SYNECHOCOCCUS	NC_010001.1	LACHNOCLOSTRIDIUM PHYTOFERMENTANS ISDG, COMPLETE GENOME	LACHNOCLOSTRIDIUM
-1.3831	KJ019052.1	SYNECHOCOCCUS PHAGE ACG-2014F ISOLATE SYN7803C7, COMPLETE GENOME. [25-AUG-2017]	SYNECHOCOCCUS	NC_010001.1	LACHNOCLOSTRIDIUM PHYTOFERMENTANS ISDG, COMPLETE GENOME	LACHNOCLOSTRIDIUM
-1.38302	KJ019053.1	SYNECHOCOCCUS PHAGE ACG-2014F ISOLATE SYN7803C80, COMPLETE GENOME. [25-AUG-2017]	SYNECHOCOCCUS	NC_010001.1	LACHNOCLOSTRIDIUM PHYTOFERMENTANS ISDG, COMPLETE GENOME	LACHNOCLOSTRIDIUM
-1.3829	KJ019059.1	SYNECHOCOCCUS PHAGE ACG-2014F ISOLATE SYN7803C90, COMPLETE GENOME. [25-AUG-2017]	SYNECHOCOCCUS	NC_010001.1	LACHNOCLOSTRIDIUM PHYTOFERMENTANS ISDG, COMPLETE GENOME	LACHNOCLOSTRIDIUM
-1.364	KJ019060.1	SYNECHOCOCCUS PHAGE ACG-2014B ISOLATE SYN7803C91, COMPLETE GENOME. [25-AUG-2017]	SYNECHOCOCCUS	NC_010001.1	LACHNOCLOSTRIDIUM PHYTOFERMENTANS ISDG, COMPLETE GENOME	LACHNOCLOSTRIDIUM
-1.37306	KJ019062.1	SYNECHOCOCCUS PHAGE ACG-2014D ISOLATE SYN7803C93, COMPLETE GENOME. [25-AUG-2017]	SYNECHOCOCCUS	NC_010001.1	LACHNOCLOSTRIDIUM PHYTOFERMENTANS ISDG, COMPLETE GENOME	LACHNOCLOSTRIDIUM
-1.36492	KJ019065.1	SYNECHOCOCCUS PHAGE ACG-2014A ISOLATE SYN7803C99, COMPLETE GENOME. [25-AUG-2017]	SYNECHOCOCCUS	NC_010001.1	LACHNOCLOSTRIDIUM PHYTOFERMENTANS ISDG, COMPLETE GENOME	LACHNOCLOSTRIDIUM
-1.38316	KJ019066.1	SYNECHOCOCCUS PHAGE ACG-2014F ISOLATE SYN7803C9, COMPLETE GENOME. [25-AUG-2017]	SYNECHOCOCCUS	NC_010001.1	LACHNOCLOSTRIDIUM PHYTOFERMENTANS ISDG, COMPLETE GENOME	LACHNOCLOSTRIDIUM
-1.36497	KJ019067.1	SYNECHOCOCCUS PHAGE ACG-2014A ISOLATE SYN7803US101, COMPLETE GENOME. [25-AUG-2017]	SYNECHOCOCCUS	NC_010001.1	LACHNOCLOSTRIDIUM PHYTOFERMENTANS ISDG, COMPLETE GENOME	LACHNOCLOSTRIDIUM
-1.36506	KJ019068.1	SYNECHOCOCCUS PHAGE ACG-2014A ISOLATE SYN7803US102, COMPLETE GENOME. [25-AUG-2017]	SYNECHOCOCCUS	NC_010001.1	LACHNOCLOSTRIDIUM PHYTOFERMENTANS ISDG, COMPLETE GENOME	LACHNOCLOSTRIDIUM
-1.36163	KJ019069.1	SYNECHOCOCCUS PHAGE ACG-2014J ISOLATE SYN7803US103, COMPLETE GENOME. [25-AUG-2017]	SYNECHOCOCCUS	NC_010001.1	LACHNOCLOSTRIDIUM PHYTOFERMENTANS ISDG, COMPLETE GENOME	LACHNOCLOSTRIDIUM
-1.36342	KJ019071.1	SYNECHOCOCCUS PHAGE ACG-2014G ISOLATE SYN7803US105, COMPLETE GENOME. [25-AUG-2017]	SYNECHOCOCCUS	NC_010001.1	LACHNOCLOSTRIDIUM PHYTOFERMENTANS ISDG, COMPLETE GENOME	LACHNOCLOSTRIDIUM
-1.3728	KJ019075.1	SYNECHOCOCCUS PHAGE ACG-2014D ISOLATE SYN7803US111, COMPLETE GENOME. [25-AUG-2017]	SYNECHOCOCCUS	NC_010001.1	LACHNOCLOSTRIDIUM PHYTOFERMENTANS ISDG, COMPLETE GENOME	LACHNOCLOSTRIDIUM
-1.36271	KJ019082.1	SYNECHOCOCCUS PHAGE ACG-2014I ISOLATE SYN7803US120, COMPLETE GENOME. [25-AUG-2017]	SYNECHOCOCCUS	NC_010001.1	LACHNOCLOSTRIDIUM PHYTOFERMENTANS ISDG, COMPLETE GENOME	LACHNOCLOSTRIDIUM
-1.36516	KJ019087.1	SYNECHOCOCCUS PHAGE ACG-2014A ISOLATE SYN7803US19, COMPLETE GENOME. [25-AUG-2017]	SYNECHOCOCCUS	NC_010001.1	LACHNOCLOSTRIDIUM PHYTOFERMENTANS ISDG, COMPLETE GENOME	LACHNOCLOSTRIDIUM
-1.36519	KJ019088.1	SYNECHOCOCCUS PHAGE ACG-2014A ISOLATE SYN7803US1, COMPLETE GENOME. [25-AUG-2017]	SYNECHOCOCCUS	NC_010001.1	LACHNOCLOSTRIDIUM PHYTOFERMENTANS ISDG, COMPLETE GENOME	LACHNOCLOSTRIDIUM
-1.38319	KJ019092.1	SYNECHOCOCCUS PHAGE ACG-2014F ISOLATE SYN7803US2, COMPLETE GENOME. [25-AUG-2017]	SYNECHOCOCCUS	NC_010001.1	LACHNOCLOSTRIDIUM PHYTOFERMENTANS ISDG, COMPLETE GENOME	LACHNOCLOSTRIDIUM
-1.3827	KJ019093.1	SYNECHOCOCCUS PHAGE ACG-2014F ISOLATE SYN7803US30, COMPLETE GENOME. [25-AUG-2017]	SYNECHOCOCCUS	NC_010001.1	LACHNOCLOSTRIDIUM PHYTOFERMENTANS ISDG, COMPLETE GENOME	LACHNOCLOSTRIDIUM
-1.3611	KJ019094.1	SYNECHOCOCCUS PHAGE ACG-2014E ISOLATE SYN7803US33, COMPLETE GENOME. [25-AUG-2017]	SYNECHOCOCCUS	NC_010001.1	LACHNOCLOSTRIDIUM PHYTOFERMENTANS ISDG, COMPLETE GENOME	LACHNOCLOSTRIDIUM
-1.3829	KJ019095.1	SYNECHOCOCCUS PHAGE ACG-2014F ISOLATE SYN7803US34, COMPLETE GENOME. [25-AUG-2017]	SYNECHOCOCCUS	NC_010001.1	LACHNOCLOSTRIDIUM PHYTOFERMENTANS ISDG, COMPLETE GENOME	LACHNOCLOSTRIDIUM
-1.38288	KJ019097.1	SYNECHOCOCCUS PHAGE ACG-2014F ISOLATE SYN7803US37, COMPLETE GENOME. [25-AUG-2017]	SYNECHOCOCCUS	NC_010001.1	LACHNOCLOSTRIDIUM PHYTOFERMENTANS ISDG, COMPLETE GENOME	LACHNOCLOSTRIDIUM
-1.38305	KJ019102.1	SYNECHOCOCCUS PHAGE ACG-2014F ISOLATE SYN7803US43, COMPLETE GENOME. [25-AUG-2017]	SYNECHOCOCCUS	NC_010001.1	LACHNOCLOSTRIDIUM PHYTOFERMENTANS ISDG, COMPLETE GENOME	LACHNOCLOSTRIDIUM
-1.36397	KJ019104.1	SYNECHOCOCCUS PHAGE ACG-2014B ISOLATE SYN7803US49, COMPLETE GENOME. [25-AUG-2017]	SYNECHOCOCCUS	NC_010001.1	LACHNOCLOSTRIDIUM PHYTOFERMENTANS ISDG, COMPLETE GENOME	LACHNOCLOSTRIDIUM
-1.36395	KJ019108.1	SYNECHOCOCCUS PHAGE ACG-2014B ISOLATE SYN7803US53, COMPLETE GENOME. [25-AUG-2017]	SYNECHOCOCCUS	NC_010001.1	LACHNOCLOSTRIDIUM PHYTOFERMENTANS ISDG, COMPLETE GENOME	LACHNOCLOSTRIDIUM
-1.36397	KJ019109.1	SYNECHOCOCCUS PHAGE ACG-2014B ISOLATE SYN7803US54, COMPLETE GENOME. [25-AUG-2017]	SYNECHOCOCCUS	NC_010001.1	LACHNOCLOSTRIDIUM PHYTOFERMENTANS ISDG, COMPLETE GENOME	LACHNOCLOSTRIDIUM
-1.36399	KJ019110.1	SYNECHOCOCCUS PHAGE ACG-2014B ISOLATE SYN7803US56, COMPLETE GENOME. [25-AUG-2017]	SYNECHOCOCCUS	NC_010001.1	LACHNOCLOSTRIDIUM PHYTOFERMENTANS ISDG, COMPLETE GENOME	LACHNOCLOSTRIDIUM
-1.38299	KJ019111.1	SYNECHOCOCCUS PHAGE ACG-2014F ISOLATE SYN7803US57, COMPLETE GENOME. [25-AUG-2017]	SYNECHOCOCCUS	NC_010001.1	LACHNOCLOSTRIDIUM PHYTOFERMENTANS ISDG, COMPLETE GENOME	LACHNOCLOSTRIDIUM
-1.37297	KJ019113.1	SYNECHOCOCCUS PHAGE ACG-2014D ISOLATE SYN7803US5, COMPLETE GENOME. [25-AUG-2017]	SYNECHOCOCCUS	NC_010001.1	LACHNOCLOSTRIDIUM PHYTOFERMENTANS ISDG, COMPLETE GENOME	LACHNOCLOSTRIDIUM
-1.36496	KJ019114.1	SYNECHOCOCCUS PHAGE ACG-2014A ISOLATE SYN7803US60, COMPLETE GENOME. [25-AUG-2017]	SYNECHOCOCCUS	NC_010001.1	LACHNOCLOSTRIDIUM PHYTOFERMENTANS ISDG, COMPLETE GENOME	LACHNOCLOSTRIDIUM
-1.36512	KJ019116.1	SYNECHOCOCCUS PHAGE ACG-2014A ISOLATE SYN7803US62, COMPLETE GENOME. [25-AUG-2017]	SYNECHOCOCCUS	NC_010001.1	LACHNOCLOSTRIDIUM PHYTOFERMENTANS ISDG, COMPLETE GENOME	LACHNOCLOSTRIDIUM
-1.3729	KJ019119.1	SYNECHOCOCCUS PHAGE ACG-2014D ISOLATE SYN7803US65, COMPLETE GENOME. [25-AUG-2017]	SYNECHOCOCCUS	NC_010001.1	LACHNOCLOSTRIDIUM PHYTOFERMENTANS ISDG, COMPLETE GENOME	LACHNOCLOSTRIDIUM
-1.36504	KJ019122.1	SYNECHOCOCCUS PHAGE ACG-2014A ISOLATE SYN7803US79, COMPLETE GENOME. [25-AUG-2017]	SYNECHOCOCCUS	NC_010001.1	LACHNOCLOSTRIDIUM PHYTOFERMENTANS ISDG, COMPLETE GENOME	LACHNOCLOSTRIDIUM
-1.37302	KJ019127.1	SYNECHOCOCCUS PHAGE ACG-2014D ISOLATE SYN7803US85, COMPLETE GENOME. [25-AUG-2017]	SYNECHOCOCCUS	NC_010001.1	LACHNOCLOSTRIDIUM PHYTOFERMENTANS ISDG, COMPLETE GENOME	LACHNOCLOSTRIDIUM
-1.37296	KJ019131.1	SYNECHOCOCCUS PHAGE ACG-2014D ISOLATE SYN7803US95, COMPLETE GENOME. [25-AUG-2017]	SYNECHOCOCCUS	NC_010001.1	LACHNOCLOSTRIDIUM PHYTOFERMENTANS ISDG, COMPLETE GENOME	LACHNOCLOSTRIDIUM
-1.36398	KJ019134.1	SYNECHOCOCCUS PHAGE ACG-2014B ISOLATE SYN7803C100, COMPLETE GENOME. [25-AUG-2017]	SYNECHOCOCCUS	NC_010001.1	LACHNOCLOSTRIDIUM PHYTOFERMENTANS ISDG, COMPLETE GENOME	LACHNOCLOSTRIDIUM
-1.37295	KJ019136.1	SYNECHOCOCCUS PHAGE ACG-2014D ISOLATE SYN7803C102, COMPLETE GENOME. [25-AUG-2017]	SYNECHOCOCCUS	NC_010001.1	LACHNOCLOSTRIDIUM PHYTOFERMENTANS ISDG, COMPLETE GENOME	LACHNOCLOSTRIDIUM
-1.36508	KJ019138.1	SYNECHOCOCCUS PHAGE ACG-2014A ISOLATE SYN7803C107, COMPLETE GENOME. [25-AUG-2017]	SYNECHOCOCCUS	NC_010001.1	LACHNOCLOSTRIDIUM PHYTOFERMENTANS ISDG, COMPLETE GENOME	LACHNOCLOSTRIDIUM
-1.38298	KJ019142.1	SYNECHOCOCCUS PHAGE ACG-2014F ISOLATE SYN7803C11, COMPLETE GENOME. [25-AUG-2017]	SYNECHOCOCCUS	NC_010001.1	LACHNOCLOSTRIDIUM PHYTOFERMENTANS ISDG, COMPLETE GENOME	LACHNOCLOSTRIDIUM
-1.38296	KJ019144.1	SYNECHOCOCCUS PHAGE ACG-2014F ISOLATE SYN7803C14, COMPLETE GENOME. [25-AUG-2017]	SYNECHOCOCCUS	NC_010001.1	LACHNOCLOSTRIDIUM PHYTOFERMENTANS ISDG, COMPLETE GENOME	LACHNOCLOSTRIDIUM
-1.38312	KJ019146.1	SYNECHOCOCCUS PHAGE ACG-2014F ISOLATE SYN7803C16, COMPLETE GENOME. [25-AUG-2017]	SYNECHOCOCCUS	NC_007181.1	SULFOLOBUS ACIDOCALDARIUS DSM 639, COMPLETE GENOME	SULFOLOBUS
-1.38276	KJ019147.1	SYNECHOCOCCUS PHAGE ACG-2014F ISOLATE SYN7803C17, COMPLETE GENOME. [25-AUG-2017]	SYNECHOCOCCUS	NC_010001.1	LACHNOCLOSTRIDIUM PHYTOFERMENTANS ISDG, COMPLETE GENOME	LACHNOCLOSTRIDIUM
-1.383	KJ019151.1	SYNECHOCOCCUS PHAGE ACG-2014F ISOLATE SYN7803C24, COMPLETE GENOME. [25-AUG-2017]	SYNECHOCOCCUS	NC_010001.1	LACHNOCLOSTRIDIUM PHYTOFERMENTANS ISDG, COMPLETE GENOME	LACHNOCLOSTRIDIUM
-1.36513	KJ019153.1	SYNECHOCOCCUS PHAGE ACG-2014A ISOLATE SYN7803C26, COMPLETE GENOME. [25-AUG-2017]	SYNECHOCOCCUS	NC_010001.1	LACHNOCLOSTRIDIUM PHYTOFERMENTANS ISDG, COMPLETE GENOME	LACHNOCLOSTRIDIUM
-1.38298	KJ019155.1	SYNECHOCOCCUS PHAGE ACG-2014F ISOLATE SYN7803C29, COMPLETE GENOME. [25-AUG-2017]	SYNECHOCOCCUS	NC_010001.1	LACHNOCLOSTRIDIUM PHYTOFERMENTANS ISDG, COMPLETE GENOME	LACHNOCLOSTRIDIUM
-1.3611	KJ019156.1	SYNECHOCOCCUS PHAGE ACG-2014E ISOLATE SYN7803C2, COMPLETE GENOME. [25-AUG-2017]	SYNECHOCOCCUS	NC_010001.1	LACHNOCLOSTRIDIUM PHYTOFERMENTANS ISDG, COMPLETE GENOME	LACHNOCLOSTRIDIUM
-1.36502	KJ019158.1	SYNECHOCOCCUS PHAGE ACG-2014A ISOLATE SYN7803C33, COMPLETE GENOME. [25-AUG-2017]	SYNECHOCOCCUS	NC_010001.1	LACHNOCLOSTRIDIUM PHYTOFERMENTANS ISDG, COMPLETE GENOME	LACHNOCLOSTRIDIUM
-1.37287	KJ019160.1	SYNECHOCOCCUS PHAGE ACG-2014D ISOLATE SYN7803C35, COMPLETE GENOME. [25-AUG-2017]	SYNECHOCOCCUS	NC_010001.1	LACHNOCLOSTRIDIUM PHYTOFERMENTANS ISDG, COMPLETE GENOME	LACHNOCLOSTRIDIUM
-1.3651	KJ019163.1	SYNECHOCOCCUS PHAGE ACG-2014A ISOLATE SYN7803C38, COMPLETE GENOME. [25-AUG-2017]	SYNECHOCOCCUS	NC_010001.1	LACHNOCLOSTRIDIUM PHYTOFERMENTANS ISDG, COMPLETE GENOME	LACHNOCLOSTRIDIUM
-1.33525	KJ024807.2	BACILLUS PHAGE VB_BTS_BMBTP3, COMPLETE GENOME. [25-AUG-2017]	BACILLUS	CP010089.1	BACILLUS THURINGIENSIS SEROVAR GALLERIAE STRAIN HD-29, COMPLETE GENOME	BACILLUS
-1.34174	KJ025956.1	MYCOBACTERIUM PHAGE SAAL, COMPLETE GENOME. [25-AUG-2017]	MYCOBACTERIUM	AP014547.1	MYCOBACTERIUM ABSCESSUS SUBSP. BOLLETII CCUG 48898 = JCM 15300 DNA, COMPLETE GENOME	MYCOBACTERIUM
-1.37426	KJ025957.1	SERRATIA PHAGE PS2, COMPLETE GENOME. [25-AUG-2017]	SERRATIA	CP009281.1	PAENIBACILLUS SP. FSL R5-0345, COMPLETE GENOME	PAENIBACILLUS
-1.28635	KJ028219.1	MYCOBACTERIUM PHAGE 32HC, COMPLETE GENOME	MYCOBACTERIUM	CP011301.1	BURKHOLDERIA CEPACIA STRAIN LO6, COMPLETE GENOME	BURKHOLDERIA
-1.37247	KJ081346.1	BACILLUS PHAGE BCP8-2, COMPLETE GENOME. [25-AUG-2017]	BACILLUS	CP010327.1	MYROIDES SP. A21, COMPLETE GENOME	MYROIDES
-1.34629	KJ094020.1	LISTERIA PHAGE LP-026, COMPLETE GENOME. [25-AUG-2017]	LISTERIA	NC_010001.1	LACHNOCLOSTRIDIUM PHYTOFERMENTANS ISDG, COMPLETE GENOME	LACHNOCLOSTRIDIUM
-1.34728	KJ094021.1	LISTERIA PHAGE LP-114, COMPLETE GENOME. [25-AUG-2017]	LISTERIA	NC_010001.1	LACHNOCLOSTRIDIUM PHYTOFERMENTANS ISDG, COMPLETE GENOME	LACHNOCLOSTRIDIUM
-1.32155	KJ094022.1	LISTERIA PHAGE LP-030-3, COMPLETE GENOME. [25-AUG-2017]	LISTERIA	NC_021829.2	LISTERIA MONOCYTOGENES J1-220, COMPLETE GENOME	LISTERIA
-1.31409	KJ094023.1	LISTERIA PHAGE LP-101, COMPLETE GENOME. [26-MAY-2017]	LISTERIA	CP007160.1	LISTERIA MONOCYTOGENES WSLC1001, COMPLETE GENOME	LISTERIA
-1.34922	KJ094025.1	LISTERIA PHAGE LP-032 CONTIG 2, PARTIAL GENOME	LISTERIA	NC_010001.1	LACHNOCLOSTRIDIUM PHYTOFERMENTANS ISDG, COMPLETE GENOME	LACHNOCLOSTRIDIUM
-1.34738	KJ094026.1	LISTERIA PHAGE LP-032 CONTIG 3, PARTIAL GENOME	LISTERIA	NC_010001.1	LACHNOCLOSTRIDIUM PHYTOFERMENTANS ISDG, COMPLETE GENOME	LACHNOCLOSTRIDIUM
-1.34673	KJ094029.1	LISTERIA PHAGE LP-064, COMPLETE GENOME. [25-AUG-2017]	LISTERIA	NC_015275.1	CLOSTRIDIUM LENTOCELLUM DSM 5427, COMPLETE GENOME	CLOSTRIDIUM
-1.34665	KJ094030.1	LISTERIA PHAGE LP-083-2, COMPLETE GENOME. [25-AUG-2017]	LISTERIA	CP010817.1	MYROIDES PROFUNDI STRAIN D25, COMPLETE GENOME	MYROIDES
-1.34672	KJ094031.2	LISTERIA PHAGE LP-124, COMPLETE GENOME. [25-AUG-2017]	LISTERIA	NC_015275.1	CLOSTRIDIUM LENTOCELLUM DSM 5427, COMPLETE GENOME	CLOSTRIDIUM
-1.37199	KJ094032.2	ENTEROCOCCUS PHAGE VD13, COMPLETE GENOME. [25-AUG-2017]	ENTEROCOCCUS	NC_010001.1	LACHNOCLOSTRIDIUM PHYTOFERMENTANS ISDG, COMPLETE GENOME	LACHNOCLOSTRIDIUM
-1.34736	KJ094033.1	LISTERIA PHAGE LP-048, COMPLETE GENOME. [25-AUG-2017]	LISTERIA	NC_015275.1	CLOSTRIDIUM LENTOCELLUM DSM 5427, COMPLETE GENOME	CLOSTRIDIUM
-1.36815	KJ101592.1	ENTEROBACTER PHAGE PG7, COMPLETE GENOME. [25-AUG-2017]	ENTEROBACTER	NC_015321.1	FLUVIICOLA TAFFENSIS DSM 16823, COMPLETE GENOME	FLUVIICOLA
-1.37219	KJ127303.1	ENTEROCOCCUS PHAGE VD13, COMPLETE GENOME. [25-AUG-2017]	ENTEROCOCCUS	NC_010001.1	LACHNOCLOSTRIDIUM PHYTOFERMENTANS ISDG, COMPLETE GENOME	LACHNOCLOSTRIDIUM
-1.38818	KJ133688.1	BRUCELLA PHAGE 02_19, COMPLETE GENOME	BRUCELLA	NC_016641.1	PAENIBACILLUS TERRAE HPL-003, COMPLETE GENOME	PAENIBACILLUS
-1.3882	KJ133691.1	BRUCELLA PHAGE 11SA_141, COMPLETE GENOME	BRUCELLA	NC_016641.1	PAENIBACILLUS TERRAE HPL-003, COMPLETE GENOME	PAENIBACILLUS
-1.38824	KJ133692.1	BRUCELLA PHAGE 110_19, COMPLETE GENOME	BRUCELLA	NC_016641.1	PAENIBACILLUS TERRAE HPL-003, COMPLETE GENOME	PAENIBACILLUS
-1.38817	KJ133693.1	BRUCELLA PHAGE 110_141, COMPLETE GENOME	BRUCELLA	NC_016641.1	PAENIBACILLUS TERRAE HPL-003, COMPLETE GENOME	PAENIBACILLUS
-1.38822	KJ133694.1	BRUCELLA PHAGE 141_19, COMPLETE GENOME	BRUCELLA	NC_016641.1	PAENIBACILLUS TERRAE HPL-003, COMPLETE GENOME	PAENIBACILLUS
-1.3882	KJ133695.1	BRUCELLA PHAGE 141_141, COMPLETE GENOME	BRUCELLA	NC_016641.1	PAENIBACILLUS TERRAE HPL-003, COMPLETE GENOME	PAENIBACILLUS
-1.38821	KJ133696.1	BRUCELLA PHAGE 177_19, COMPLETE GENOME	BRUCELLA	NC_016641.1	PAENIBACILLUS TERRAE HPL-003, COMPLETE GENOME	PAENIBACILLUS
-1.38826	KJ133698.1	BRUCELLA PHAGE 281_19, COMPLETE GENOME	BRUCELLA	NC_016641.1	PAENIBACILLUS TERRAE HPL-003, COMPLETE GENOME	PAENIBACILLUS
-1.38827	KJ133699.1	BRUCELLA PHAGE 281_141, COMPLETE GENOME	BRUCELLA	NC_016641.1	PAENIBACILLUS TERRAE HPL-003, COMPLETE GENOME	PAENIBACILLUS
-1.38821	KJ133700.1	BRUCELLA PHAGE 544_19, COMPLETE GENOME	BRUCELLA	NC_016641.1	PAENIBACILLUS TERRAE HPL-003, COMPLETE GENOME	PAENIBACILLUS
-1.38822	KJ133701.1	BRUCELLA PHAGE 544_141, COMPLETE GENOME	BRUCELLA	NC_016641.1	PAENIBACILLUS TERRAE HPL-003, COMPLETE GENOME	PAENIBACILLUS
-1.38821	KJ133702.1	BRUCELLA PHAGE 1066_19, COMPLETE GENOME	BRUCELLA	NC_016641.1	PAENIBACILLUS TERRAE HPL-003, COMPLETE GENOME	PAENIBACILLUS
-1.38823	KJ133703.1	BRUCELLA PHAGE 1066_141, COMPLETE GENOME	BRUCELLA	NC_016641.1	PAENIBACILLUS TERRAE HPL-003, COMPLETE GENOME	PAENIBACILLUS
-1.38824	KJ133704.1	BRUCELLA PHAGE TBILISI, COMPLETE GENOME	BRUCELLA	NC_016641.1	PAENIBACILLUS TERRAE HPL-003, COMPLETE GENOME	PAENIBACILLUS
-1.38829	KJ133707.1	BRUCELLA PHAGE V_141, COMPLETE GENOME	BRUCELLA	NC_016641.1	PAENIBACILLUS TERRAE HPL-003, COMPLETE GENOME	PAENIBACILLUS
-1.38069	KJ135004.2	ENTEROBACTERIA PHAGE BP4, COMPLETE GENOME. [25-AUG-2017]	ENTEROBACTERIA	CP009281.1	PAENIBACILLUS SP. FSL R5-0345, COMPLETE GENOME	PAENIBACILLUS
-1.30902	KJ156985.1	MYCOBACTERIUM PHAGE RHYNO, COMPLETE GENOME	MYCOBACTERIUM	NC_015635.1	MICROLUNATUS PHOSPHOVORUS NM-1 DNA, COMPLETE GENOME	MICROLUNATUS
-1.35698	KJ159566.1	GEOBACILLUS PHAGE GBK2, COMPLETE GENOME	GEOBACILLUS	NC_015660.1	PARAGEOBACILLUS THERMOGLUCOSIDASIUS C56-YS93, COMPLETE GENOME	PARAGEOBACILLUS
-1.32447	KJ174156.1	MYCOBACTERIUM PHAGE ALSFRO, COMPLETE GENOME. [25-AUG-2017]	MYCOBACTERIUM	NC_016604.1	MYCOBACTERIUM RHODESIAE NBB3, COMPLETE GENOME	MYCOBACTERIUM
-1.28035	KJ174157.1	MYCOBACTERIUM PHAGE SOTO, COMPLETE GENOME. [26-MAY-2017]	MYCOBACTERIUM	NC_018289.1	MYCOBACTERIUM SMEGMATIS STR. MC2 155, COMPLETE GENOME	MYCOBACTERIUM
-1.38396	KJ174317.1	SALMONELLA PHAGE VB_SALM_SJ2, COMPLETE GENOME. [25-AUG-2017]	SALMONELLA	CP009281.1	PAENIBACILLUS SP. FSL R5-0345, COMPLETE GENOME	PAENIBACILLUS
-1.38217	KJ174318.1	SALMONELLA PHAGE VB_SALM_SJ3, COMPLETE GENOME. [25-AUG-2017]	SALMONELLA	CP009281.1	PAENIBACILLUS SP. FSL R5-0345, COMPLETE GENOME	PAENIBACILLUS
-1.33174	KJ183192.1	PODOVIRUS LAU218 STRAIN KILOMOANA, COMPLETE GENOME	PODOVIRUS	NC_014393.1	CLOSTRIDIUM CELLULOVORANS 743B, COMPLETE GENOME	CLOSTRIDIUM
-1.33222	KJ183193.1	PODOVIRUS LAU218 STRAIN TAHIMOANA, COMPLETE GENOME	PODOVIRUS	NC_014393.1	CLOSTRIDIUM CELLULOVORANS 743B, COMPLETE GENOME	CLOSTRIDIUM
-1.37149	KJ190157.1	ESCHERICHIA PHAGE VB_ECOS_FFH1, COMPLETE GENOME. [25-AUG-2017]	ESCHERICHIA	NC_010001.1	LACHNOCLOSTRIDIUM PHYTOFERMENTANS ISDG, COMPLETE GENOME	LACHNOCLOSTRIDIUM
-1.38213	KJ190158.1	ESCHERICHIA PHAGE VB_ECOM_FFH2, COMPLETE GENOME. [25-AUG-2017]	ESCHERICHIA	CP009279.1	PAENIBACILLUS SP. FSL H7-0737, COMPLETE GENOME	PAENIBACILLUS
-1.31861	KJ192196.1	MYCOBACTERIUM PHAGE 40AC, COMPLETE GENOME	MYCOBACTERIUM	NC_016604.1	MYCOBACTERIUM RHODESIAE NBB3, COMPLETE GENOME	MYCOBACTERIUM
-1.38987	KJ192399.2	VIBRIO PHAGE CHOED, COMPLETE GENOME. [26-MAY-2017]	VIBRIO	CP009281.1	PAENIBACILLUS SP. FSL R5-0345, COMPLETE GENOME	PAENIBACILLUS
-1.28155	KJ194579.1	MYCOBACTERIUM PHAGE SWISH, COMPLETE GENOME. [26-MAY-2017]	MYCOBACTERIUM	NC_018289.1	MYCOBACTERIUM SMEGMATIS STR. MC2 155, COMPLETE GENOME	MYCOBACTERIUM
-1.28111	KJ194580.1	MYCOBACTERIUM PHAGE BADFISH, COMPLETE GENOME. [26-MAY-2017]	MYCOBACTERIUM	NC_018289.1	MYCOBACTERIUM SMEGMATIS STR. MC2 155, COMPLETE GENOME	MYCOBACTERIUM
-1.36278	KJ194582.1	MYCOBACTERIUM PHAGE HAWKEYE, COMPLETE GENOME. [26-MAY-2017]	MYCOBACTERIUM	NC_016631.1	GRANULICELLA MALLENSIS MP5ACTX8, COMPLETE GENOME	GRANULICELLA
-1.28159	KJ194583.1	MYCOBACTERIUM PHAGE NUMBERTEN, COMPLETE GENOME. [26-MAY-2017]	MYCOBACTERIUM	NC_018289.1	MYCOBACTERIUM SMEGMATIS STR. MC2 155, COMPLETE GENOME	MYCOBACTERIUM
-1.32489	KJ194585.1	MYCOBACTERIUM PHAGE SEABISCUIT, COMPLETE GENOME. [25-AUG-2017]	MYCOBACTERIUM	NC_016604.1	MYCOBACTERIUM RHODESIAE NBB3, COMPLETE GENOME	MYCOBACTERIUM
-1.30193	KJ206559.1	STAPHYLOCOCCUS PHAGE 812, COMPLETE GENOME	STAPHYLOCOCCUS	FN665652.1	CLOSTRIDIUM DIFFICILE COMPLETE GENOME, STRAIN CF5	CLOSTRIDIUM
-1.30211	KJ206560.1	STAPHYLOCOCCUS PHAGE 812 ISOLATE HOST-RANGE MUTANT 812A, COMPLETE GENOME	STAPHYLOCOCCUS	FN665652.1	CLOSTRIDIUM DIFFICILE COMPLETE GENOME, STRAIN CF5	CLOSTRIDIUM
-1.30214	KJ206561.1	STAPHYLOCOCCUS PHAGE 812 ISOLATE HOST-RANGE MUTANT K1, COMPLETE GENOME	STAPHYLOCOCCUS	FN665652.1	CLOSTRIDIUM DIFFICILE COMPLETE GENOME, STRAIN CF5	CLOSTRIDIUM
-1.30184	KJ206562.1	STAPHYLOCOCCUS PHAGE 812 ISOLATE HOST-RANGE MUTANT 812F1, COMPLETE GENOME	STAPHYLOCOCCUS	FN665652.1	CLOSTRIDIUM DIFFICILE COMPLETE GENOME, STRAIN CF5	CLOSTRIDIUM
-1.30187	KJ206563.1	STAPHYLOCOCCUS PHAGE 812 ISOLATE HOST-RANGE MUTANT K1/420, COMPLETE GENOME	STAPHYLOCOCCUS	FN665652.1	CLOSTRIDIUM DIFFICILE COMPLETE GENOME, STRAIN CF5	CLOSTRIDIUM
-1.29501	KJ210330.1	STAPHYLOCOCCUS PHAGE GRCS, COMPLETE GENOME. [11-NOV-2016]	STAPHYLOCOCCUS	LN626917.1	STAPHYLOCOCCUS AUREUS GENOME ASSEMBLY STAPHYLOCOCCUS_AUREUS_ILRI_EYMOLE1/1, CHROMOSOME : I	STAPHYLOCOCCUS
-1.37598	KJ395778.1	VIBRIO PHAGE PVA1, COMPLETE GENOME	VIBRIO	NC_015276.1	MARINOMONAS MEDITERRANEA MMB-1, COMPLETE GENOME	MARINOMONAS
-1.32314	KJ409696.1	MYCOBACTERIUM PHAGE LAMINA13, COMPLETE GENOME. [25-AUG-2017]	MYCOBACTERIUM	NC_016604.1	MYCOBACTERIUM RHODESIAE NBB3, COMPLETE GENOME	MYCOBACTERIUM
-1.3881	KJ409772.1	PSEUDOMONAS PHAGE PHIPSA374, COMPLETE GENOME	PSEUDOMONAS	CP003241.1	VIBRIO SP. EJY3 CHROMOSOME 1, COMPLETE SEQUENCE	VIBRIO
-1.31438	KJ410132.1	MYCOBACTERIUM PHAGE 20ES, COMPLETE GENOME	MYCOBACTERIUM	NC_016604.1	MYCOBACTERIUM RHODESIAE NBB3, COMPLETE GENOME	MYCOBACTERIUM
-1.25952	KJ410133.1	MYCOBACTERIUM PHAGE JOLIE2, COMPLETE GENOME	MYCOBACTERIUM	NC_017186.1	AMYCOLATOPSIS MEDITERRANEI S699, COMPLETE GENOME	AMYCOLATOPSIS
-1.31577	KJ410134.1	MYCOBACTERIUM PHAGE CRB1, COMPLETE GENOME	MYCOBACTERIUM	NC_016604.1	MYCOBACTERIUM RHODESIAE NBB3, COMPLETE GENOME	MYCOBACTERIUM
-1.38602	KJ419279.1	ENTEROBACTERIA PHAGE 9G, COMPLETE GENOME. [26-MAY-2017]	ENTEROBACTERIA	CP009279.1	PAENIBACILLUS SP. FSL H7-0737, COMPLETE GENOME	PAENIBACILLUS
-1.24244	KJ433973.1	MYCOBACTERIUM PHAGE 39HC, COMPLETE GENOME	MYCOBACTERIUM	NC_016582.1	STREPTOMYCES BINGCHENGGENSIS BCW-1, COMPLETE GENOME	STREPTOMYCES
-1.24433	KJ433974.1	MYCOBACTERIUM PHAGE HOSP, COMPLETE GENOME. [26-MAY-2017]	MYCOBACTERIUM	NC_016582.1	STREPTOMYCES BINGCHENGGENSIS BCW-1, COMPLETE GENOME	STREPTOMYCES
-1.24603	KJ433976.1	MYCOBACTERIUM PHAGE JOLIE1, COMPLETE GENOME	MYCOBACTERIUM	NC_016582.1	STREPTOMYCES BINGCHENGGENSIS BCW-1, COMPLETE GENOME	STREPTOMYCES
-1.37633	KJ451625.1	BACILLUS PHAGE BCP1, COMPLETE GENOME. [25-AUG-2017]	BACILLUS	CP010976.1	PAENIBACILLUS SP. IHBB 10380, COMPLETE GENOME	PAENIBACILLUS
-1.31737	KJ452291.1	STAPHYLOCOCCUS PHAGE 3MRA, COMPLETE GENOME	STAPHYLOCOCCUS	NC_021554.1	STAPHYLOCOCCUS AUREUS CA-347, COMPLETE GENOME	STAPHYLOCOCCUS
-1.28319	KJ452292.1	STAPHYLOCOCCUS PHAGE 23MRA, COMPLETE GENOME	STAPHYLOCOCCUS	CP007176.1	STAPHYLOCOCCUS AUREUS USA300-ISMMS1, COMPLETE GENOME	STAPHYLOCOCCUS
-1.35896	KJ473422.1	ACINETOBACTER PHAGE VB_ABAM_ACIBEL004, COMPLETE GENOME. [25-AUG-2017]	ACINETOBACTER	NC_010001.1	LACHNOCLOSTRIDIUM PHYTOFERMENTANS ISDG, COMPLETE GENOME	LACHNOCLOSTRIDIUM
-1.38006	KJ473423.1	ACINETOBACTER PHAGE VB_ABAP_ACIBEL007, COMPLETE GENOME. [26-MAY-2017]	ACINETOBACTER	NC_014259.1	ACINETOBACTER OLEIVORANS DR1, COMPLETE GENOME	ACINETOBACTER
-1.2977	KJ477077.1	PSEUDOMONAS PHAGE JD024, COMPLETE GENOME. [26-MAY-2017]	PSEUDOMONAS	NC_011770.1	PSEUDOMONAS AERUGINOSA LESB58 COMPLETE GENOME SEQUENCE	PSEUDOMONAS
-1.34464	KJ477684.1	ENTEROBACTERIA PHAGE T4 STRAIN WILD, COMPLETE GENOME. [25-AUG-2017]	ENTEROBACTERIA	CP007447.1	STAPHYLOCOCCUS AUREUS STRAIN XN108, COMPLETE GENOME	STAPHYLOCOCCUS
-1.34481	KJ477685.1	ENTEROBACTERIA PHAGE T4 STRAIN 147, COMPLETE GENOME. [25-AUG-2017]	ENTEROBACTERIA	AP014583.1	WINOGRADSKYELLA SP. PG-2 DNA, COMPLETE GENOME	WINOGRADSKYELLA
-1.3444	KJ477686.1	ENTEROBACTERIA PHAGE T4 STRAIN GT7, COMPLETE GENOME. [25-AUG-2017]	ENTEROBACTERIA	AP014583.1	WINOGRADSKYELLA SP. PG-2 DNA, COMPLETE GENOME	WINOGRADSKYELLA
-1.33087	KJ489010.1	LACTOCOCCUS PHAGE P078, COMPLETE GENOME. [25-AUG-2017]	LACTOCOCCUS	NC_018608.1	STAPHYLOCOCCUS AUREUS 08BA02176, COMPLETE GENOME	STAPHYLOCOCCUS
-1.33071	KJ489011.1	LACTOCOCCUS PHAGE P092, COMPLETE GENOME. [25-AUG-2017]	LACTOCOCCUS	AP014583.1	WINOGRADSKYELLA SP. PG-2 DNA, COMPLETE GENOME	WINOGRADSKYELLA
-1.3296	KJ489012.1	LACTOCOCCUS PHAGE P118, COMPLETE GENOME. [25-AUG-2017]	LACTOCOCCUS	NC_018608.1	STAPHYLOCOCCUS AUREUS 08BA02176, COMPLETE GENOME	STAPHYLOCOCCUS
-1.32893	KJ489013.1	LACTOCOCCUS PHAGE P162, COMPLETE GENOME. [25-AUG-2017]	LACTOCOCCUS	NC_020291.1	CLOSTRIDIUM SACCHAROPERBUTYLACETONICUM N1-4(HMT), COMPLETE GENOME	CLOSTRIDIUM
-1.36378	KJ489397.1	BACILLUS PHAGE CAM003, COMPLETE GENOME. [25-AUG-2017]	BACILLUS	NC_010001.1	LACHNOCLOSTRIDIUM PHYTOFERMENTANS ISDG, COMPLETE GENOME	LACHNOCLOSTRIDIUM
-1.36397	KJ489398.1	BACILLUS PHAGE EVOLI, COMPLETE GENOME. [25-AUG-2017]	BACILLUS	NC_010001.1	LACHNOCLOSTRIDIUM PHYTOFERMENTANS ISDG, COMPLETE GENOME	LACHNOCLOSTRIDIUM
-1.3706	KJ489399.1	BACILLUS PHAGE HAKUNA, COMPLETE GENOME. [25-AUG-2017]	BACILLUS	NC_010001.1	LACHNOCLOSTRIDIUM PHYTOFERMENTANS ISDG, COMPLETE GENOME	LACHNOCLOSTRIDIUM
-1.36367	KJ489400.1	BACILLUS PHAGE HOODY T, COMPLETE GENOME. [25-AUG-2017]	BACILLUS	NC_010001.1	LACHNOCLOSTRIDIUM PHYTOFERMENTANS ISDG, COMPLETE GENOME	LACHNOCLOSTRIDIUM
-1.37132	KJ489401.1	BACILLUS PHAGE MEGATRON, COMPLETE GENOME. [25-AUG-2017]	BACILLUS	NC_010001.1	LACHNOCLOSTRIDIUM PHYTOFERMENTANS ISDG, COMPLETE GENOME	LACHNOCLOSTRIDIUM
-1.36237	KJ489402.1	BACILLUS PHAGE RILEY, COMPLETE GENOME. [25-AUG-2017]	BACILLUS	NC_010001.1	LACHNOCLOSTRIDIUM PHYTOFERMENTANS ISDG, COMPLETE GENOME	LACHNOCLOSTRIDIUM
-1.36269	KJ507099.1	PSEUDOMONAS PHAGE PHIPSA2, COMPLETE GENOME	PSEUDOMONAS	NC_016631.1	GRANULICELLA MALLENSIS MP5ACTX8, COMPLETE GENOME	GRANULICELLA
-1.34587	KJ507100.1	PSEUDOMONAS PHAGE PHIPSA1, COMPLETE GENOME	PSEUDOMONAS	CP007441.1	PSEUDOMONAS STUTZERI STRAIN 28A24, COMPLETE GENOME	PSEUDOMONAS
-1.2676	KJ510412.1	MYCOBACTERIUM PHAGE ZOEJ, COMPLETE GENOME. [26-MAY-2017]	MYCOBACTERIUM	NC_017904.1	MYCOBACTERIUM SP. MOTT36Y, COMPLETE GENOME	MYCOBACTERIUM
-1.29242	KJ510413.1	MYCOBACTERIUM PHAGE BERNAL13, COMPLETE GENOME. [25-AUG-2017]	MYCOBACTERIUM	NC_019966.1	MYCOBACTERIUM SP. JS623, COMPLETE GENOME	MYCOBACTERIUM
-1.32109	KJ510414.1	MYCOBACTERIUM PHAGE KAMPY, COMPLETE GENOME. [25-AUG-2017]	MYCOBACTERIUM	NC_016604.1	MYCOBACTERIUM RHODESIAE NBB3, COMPLETE GENOME	MYCOBACTERIUM
-1.31993	KJ510415.1	MYCOBACTERIUM PHAGE PHANTASTIC, COMPLETE GENOME. [25-AUG-2017]	MYCOBACTERIUM	CP009914.1	MYCOBACTERIUM SP. VKM AC-1817D, COMPLETE GENOME	MYCOBACTERIUM
-1.30818	KJ528544.1	LACTOCCOCUS PHAGE WP-2, COMPLETE GENOME. [26-MAY-2017]	LACTOCCOCUS	NC_020291.1	CLOSTRIDIUM SACCHAROPERBUTYLACETONICUM N1-4(HMT), COMPLETE GENOME	CLOSTRIDIUM
-1.37317	KJ534580.1	NITRINCOLA PHAGE 1M3-16, COMPLETE GENOME. [25-AUG-2017]	NITRINCOLA	CP010976.1	PAENIBACILLUS SP. IHBB 10380, COMPLETE GENOME	PAENIBACILLUS
-1.34609	KJ535722.1	LISTERIA PHAGE LMSP-25, COMPLETE GENOME. [25-AUG-2017]	LISTERIA	NC_015275.1	CLOSTRIDIUM LENTOCELLUM DSM 5427, COMPLETE GENOME	CLOSTRIDIUM
-1.32744	KJ538721.1	MYCOBACTERIUM PHAGE MOSMORIS, COMPLETE GENOME. [26-MAY-2017]	MYCOBACTERIUM	NC_016604.1	MYCOBACTERIUM RHODESIAE NBB3, COMPLETE GENOME	MYCOBACTERIUM
-1.37656	KJ564036.1	LACTOBACILLUS PHAGE LD25A, COMPLETE GENOME. [25-AUG-2017]	LACTOBACILLUS	CP009281.1	PAENIBACILLUS SP. FSL R5-0345, COMPLETE GENOME	PAENIBACILLUS
-1.37693	KJ564037.1	LACTOBACILLUS PHAGE LD17, COMPLETE GENOME. [25-AUG-2017]	LACTOBACILLUS	CP009281.1	PAENIBACILLUS SP. FSL R5-0345, COMPLETE GENOME	PAENIBACILLUS
-1.37786	KJ564038.1	LACTOBACILLUS PHAGE LD3, COMPLETE GENOME. [25-AUG-2017]	LACTOBACILLUS	CP009281.1	PAENIBACILLUS SP. FSL R5-0345, COMPLETE GENOME	PAENIBACILLUS
-1.34646	KJ567041.1	MYCOBACTERIUM PHAGE ZAPNER, COMPLETE GENOME	MYCOBACTERIUM	CP009616.1	MYCOBACTERIUM ABSCESSUS STRAIN 4529, COMPLETE GENOME	MYCOBACTERIUM
-1.30018	KJ567042.1	MYCOBACTERIUM PHAGE OKIROE, COMPLETE GENOME	MYCOBACTERIUM	NC_019966.1	MYCOBACTERIUM SP. JS623, COMPLETE GENOME	MYCOBACTERIUM
-1.38027	KJ567043.1	MYCOBACTERIUM PHAGE GAIA, COMPLETE GENOME. [25-AUG-2017]	MYCOBACTERIUM	NC_015564.1	HOYOSELLA SUBFLAVA DQS3-9A1, COMPLETE GENOME	HOYOSELLA
-1.35134	KJ567046.1	MYCOBACTERIUM PHAGE DAMIEN, COMPLETE GENOME	MYCOBACTERIUM	NC_008009.1	CANDIDATUS KORIBACTER VERSATILIS ELLIN345, COMPLETE GENOME	CANDIDATUS
-1.36784	KJ572845.2	VIBRIO PHAGE X29, COMPLETE GENOME	VIBRIO	CP003241.1	VIBRIO SP. EJY3 CHROMOSOME 1, COMPLETE SEQUENCE	VIBRIO
-1.37922	KJ578758.1	PROPIONIBACTERIUM PHAGE PHL009M11, COMPLETE GENOME. [26-MAY-2017]	PROPIONIBACTERIUM	NC_022198.1	CORYNEBACTERIUM ARGENTORATENSE DSM 44202, COMPLETE GENOME	CORYNEBACTERIUM
-1.37569	KJ578759.1	PROPIONIBACTERIUM PHAGE PHL025M00, COMPLETE GENOME. [26-MAY-2017]	PROPIONIBACTERIUM	NC_022198.1	CORYNEBACTERIUM ARGENTORATENSE DSM 44202, COMPLETE GENOME	CORYNEBACTERIUM
-1.37534	KJ578760.1	PROPIONIBACTERIUM PHAGE PHL030N00, COMPLETE GENOME. [26-MAY-2017]	PROPIONIBACTERIUM	NC_022198.1	CORYNEBACTERIUM ARGENTORATENSE DSM 44202, COMPLETE GENOME	CORYNEBACTERIUM
-1.37392	KJ578761.1	PROPIONIBACTERIUM PHAGE PHL041M10, COMPLETE GENOME. [26-MAY-2017]	PROPIONIBACTERIUM	NC_022198.1	CORYNEBACTERIUM ARGENTORATENSE DSM 44202, COMPLETE GENOME	CORYNEBACTERIUM
-1.37412	KJ578762.1	PROPIONIBACTERIUM PHAGE PHL055N00, COMPLETE GENOME. [26-MAY-2017]	PROPIONIBACTERIUM	NC_022198.1	CORYNEBACTERIUM ARGENTORATENSE DSM 44202, COMPLETE GENOME	CORYNEBACTERIUM
-1.37544	KJ578763.1	PROPIONIBACTERIUM PHAGE PHL064M01, COMPLETE GENOME. [26-MAY-2017]	PROPIONIBACTERIUM	NC_022198.1	CORYNEBACTERIUM ARGENTORATENSE DSM 44202, COMPLETE GENOME	CORYNEBACTERIUM
-1.37543	KJ578764.1	PROPIONIBACTERIUM PHAGE PHL064M02, COMPLETE GENOME. [26-MAY-2017]	PROPIONIBACTERIUM	NC_022198.1	CORYNEBACTERIUM ARGENTORATENSE DSM 44202, COMPLETE GENOME	CORYNEBACTERIUM
-1.37493	KJ578765.1	PROPIONIBACTERIUM PHAGE PHL067M01, COMPLETE GENOME. [26-MAY-2017]	PROPIONIBACTERIUM	NC_022198.1	CORYNEBACTERIUM ARGENTORATENSE DSM 44202, COMPLETE GENOME	CORYNEBACTERIUM
-1.37492	KJ578766.1	PROPIONIBACTERIUM PHAGE PHL067M09, COMPLETE GENOME. [26-MAY-2017]	PROPIONIBACTERIUM	NC_022198.1	CORYNEBACTERIUM ARGENTORATENSE DSM 44202, COMPLETE GENOME	CORYNEBACTERIUM
-1.37645	KJ578767.1	PROPIONIBACTERIUM PHAGE PHL070N00, COMPLETE GENOME. [26-MAY-2017]	PROPIONIBACTERIUM	NC_022198.1	CORYNEBACTERIUM ARGENTORATENSE DSM 44202, COMPLETE GENOME	CORYNEBACTERIUM
-1.37544	KJ578768.1	PROPIONIBACTERIUM PHAGE PHL082M00, COMPLETE GENOME. [26-MAY-2017]	PROPIONIBACTERIUM	NC_022198.1	CORYNEBACTERIUM ARGENTORATENSE DSM 44202, COMPLETE GENOME	CORYNEBACTERIUM
-1.37551	KJ578769.1	PROPIONIBACTERIUM PHAGE PHL082M02, COMPLETE GENOME. [26-MAY-2017]	PROPIONIBACTERIUM	NC_022198.1	CORYNEBACTERIUM ARGENTORATENSE DSM 44202, COMPLETE GENOME	CORYNEBACTERIUM
-1.37544	KJ578771.1	PROPIONIBACTERIUM PHAGE PHL082M04, COMPLETE GENOME. [26-MAY-2017]	PROPIONIBACTERIUM	NC_022198.1	CORYNEBACTERIUM ARGENTORATENSE DSM 44202, COMPLETE GENOME	CORYNEBACTERIUM
-1.3787	KJ578772.1	PROPIONIBACTERIUM PHAGE PHL085N00, COMPLETE GENOME. [26-MAY-2017]	PROPIONIBACTERIUM	NC_022198.1	CORYNEBACTERIUM ARGENTORATENSE DSM 44202, COMPLETE GENOME	CORYNEBACTERIUM
-1.37606	KJ578773.1	PROPIONIBACTERIUM PHAGE PHL092M00, COMPLETE GENOME. [26-MAY-2017]	PROPIONIBACTERIUM	NC_013174.1	JONESIA DENITRIFICANS DSM 20603, COMPLETE GENOME	JONESIA
-1.37574	KJ578774.1	PROPIONIBACTERIUM PHAGE PHL095N00, COMPLETE GENOME. [26-MAY-2017]	PROPIONIBACTERIUM	NC_022198.1	CORYNEBACTERIUM ARGENTORATENSE DSM 44202, COMPLETE GENOME	CORYNEBACTERIUM
-1.37653	KJ578776.1	PROPIONIBACTERIUM PHAGE PHL116M00, COMPLETE GENOME. [26-MAY-2017]	PROPIONIBACTERIUM	NC_022198.1	CORYNEBACTERIUM ARGENTORATENSE DSM 44202, COMPLETE GENOME	CORYNEBACTERIUM
-1.37411	KJ578778.1	PROPIONIBACTERIUM PHAGE PHL117M00, COMPLETE GENOME. [26-MAY-2017]	PROPIONIBACTERIUM	NC_022198.1	CORYNEBACTERIUM ARGENTORATENSE DSM 44202, COMPLETE GENOME	CORYNEBACTERIUM
-1.37556	KJ578779.1	PROPIONIBACTERIUM PHAGE PHL117M01, COMPLETE GENOME. [26-MAY-2017]	PROPIONIBACTERIUM	NC_022198.1	CORYNEBACTERIUM ARGENTORATENSE DSM 44202, COMPLETE GENOME	CORYNEBACTERIUM
-1.37501	KJ578780.1	PROPIONIBACTERIUM PHAGE PHL132N00, COMPLETE GENOME. [26-MAY-2017]	PROPIONIBACTERIUM	NC_013174.1	JONESIA DENITRIFICANS DSM 20603, COMPLETE GENOME	JONESIA
-1.37632	KJ578781.1	PROPIONIBACTERIUM PHAGE PHL141N00, COMPLETE GENOME. [26-MAY-2017]	PROPIONIBACTERIUM	NC_022198.1	CORYNEBACTERIUM ARGENTORATENSE DSM 44202, COMPLETE GENOME	CORYNEBACTERIUM
-1.37655	KJ578782.1	PROPIONIBACTERIUM PHAGE PHL150M00, COMPLETE GENOME. [26-MAY-2017]	PROPIONIBACTERIUM	NC_022198.1	CORYNEBACTERIUM ARGENTORATENSE DSM 44202, COMPLETE GENOME	CORYNEBACTERIUM
-1.37435	KJ578785.1	PROPIONIBACTERIUM PHAGE PHL152M00, COMPLETE GENOME. [26-MAY-2017]	PROPIONIBACTERIUM	NC_022198.1	CORYNEBACTERIUM ARGENTORATENSE DSM 44202, COMPLETE GENOME	CORYNEBACTERIUM
-1.38012	KJ578787.1	PROPIONIBACTERIUM PHAGE PHL171M01, COMPLETE GENOME. [26-MAY-2017]	PROPIONIBACTERIUM	NC_013174.1	JONESIA DENITRIFICANS DSM 20603, COMPLETE GENOME	JONESIA
-1.37598	KJ578788.1	PROPIONIBACTERIUM PHAGE PHL179M00, COMPLETE GENOME. [26-MAY-2017]	PROPIONIBACTERIUM	NC_022198.1	CORYNEBACTERIUM ARGENTORATENSE DSM 44202, COMPLETE GENOME	CORYNEBACTERIUM
-1.37498	KJ578790.1	PROPIONIBACTERIUM PHAGE PHL199M00, COMPLETE GENOME. [26-MAY-2017]	PROPIONIBACTERIUM	NC_022198.1	CORYNEBACTERIUM ARGENTORATENSE DSM 44202, COMPLETE GENOME	CORYNEBACTERIUM
-1.37378	KJ578791.1	PROPIONIBACTERIUM PHAGE PHL301M00, COMPLETE GENOME. [26-MAY-2017]	PROPIONIBACTERIUM	NC_022198.1	CORYNEBACTERIUM ARGENTORATENSE DSM 44202, COMPLETE GENOME	CORYNEBACTERIUM
-1.37668	KJ578792.1	PROPIONIBACTERIUM PHAGE PHL308M00, COMPLETE GENOME. [26-MAY-2017]	PROPIONIBACTERIUM	NC_022198.1	CORYNEBACTERIUM ARGENTORATENSE DSM 44202, COMPLETE GENOME	CORYNEBACTERIUM
-1.34475	KJ586795.1	LISTERIA PHAGE LMTA-94, COMPLETE GENOME. [25-AUG-2017]	LISTERIA	CP010817.1	MYROIDES PROFUNDI STRAIN D25, COMPLETE GENOME	MYROIDES
-1.34476	KJ591605.1	LISTERIA PHAGE LMTA-57, COMPLETE GENOME. [25-AUG-2017]	LISTERIA	CP010817.1	MYROIDES PROFUNDI STRAIN D25, COMPLETE GENOME	MYROIDES
-1.29727	KJ595575.1	MYCOBACTERIUM PHAGE WILLIS, COMPLETE GENOME. [25-AUG-2017]	MYCOBACTERIUM	CP009914.1	MYCOBACTERIUM SP. VKM AC-1817D, COMPLETE GENOME	MYCOBACTERIUM
-1.28191	KJ595576.1	MYCOBACTERIUM PHAGE MANAD, COMPLETE GENOME	MYCOBACTERIUM	NC_008596.1	MYCOBACTERIUM SMEGMATIS STR. MC2 155 CHROMOSOME, COMPLETE GENOME	MYCOBACTERIUM
-1.31429	KJ596420.1	STAPHYLOCOCCUS PHAGE PHISA119, COMPLETE GENOME. [26-MAY-2017]	STAPHYLOCOCCUS	CP007447.1	STAPHYLOCOCCUS AUREUS STRAIN XN108, COMPLETE GENOME	STAPHYLOCOCCUS
-1.35117	KJ603229.1	SHIGELLA PHAGE POCJ13, COMPLETE GENOME. [26-MAY-2017]	SHIGELLA	NC_018658.1	ESCHERICHIA COLI O104:H4 STR. 2011C-3493 CHROMOSOME, COMPLETE GENOME	ESCHERICHIA
-1.32919	KJ608188.1	ENTEROCOCCUS PHAGE EFC-1, COMPLETE GENOME. [26-MAY-2017]	ENTEROCOCCUS	CP004081.1	ENTEROCOCCUS FAECALIS DENG1, COMPLETE GENOME	ENTEROCOCCUS
-1.36032	KJ617393.1	STREPTOCOCCUS PHAGE SOCP, COMPLETE GENOME. [26-MAY-2017]	STREPTOCOCCUS	NC_022244.1	STREPTOCOCCUS ANGINOSUS C1051, COMPLETE GENOME	STREPTOCOCCUS
-1.37185	KJ621082.2	DINOROSEOBACTER PHAGE DFL12PHI1, COMPLETE GENOME. [25-AUG-2017]	DINOROSEOBACTER	NC_014148.1	PLANCTOPIRUS LIMNOPHILA DSM 3776, COMPLETE GENOME	PLANCTOPIRUS
-1.3635	KJ628499.1	ACINETOBACTER PHAGE VB_ABAM_PHIABAA1, COMPLETE GENOME	ACINETOBACTER	NC_010001.1	LACHNOCLOSTRIDIUM PHYTOFERMENTANS ISDG, COMPLETE GENOME	LACHNOCLOSTRIDIUM
-1.37996	KJ668713.1	ESCHERICHIA PHAGE E4/1C, COMPLETE GENOME. [25-AUG-2017]	ESCHERICHIA	NC_013166.1	KANGIELLA KOREENSIS DSM 16069, COMPLETE GENOME	KANGIELLA
-1.34409	KJ668714.2	ESCHERICHIA PHAGE E11/2, COMPLETE GENOME. [25-AUG-2017]	ESCHERICHIA	NC_014759.1	MARIVIRGA TRACTUOSA DSM 4126, COMPLETE GENOME	MARIVIRGA
-1.37413	KJ676859.1	BACILLUS PHAGE JBP901, COMPLETE GENOME. [25-AUG-2017]	BACILLUS	CP010817.1	MYROIDES PROFUNDI STRAIN D25, COMPLETE GENOME	MYROIDES
-1.32601	KJ690250.1	MYCOBACTERIUM PHAGE PINTO, COMPLETE GENOME	MYCOBACTERIUM	CP009914.1	MYCOBACTERIUM SP. VKM AC-1817D, COMPLETE GENOME	MYCOBACTERIUM
-1.29613	KJ716334.1	STAPHYLOCOCCUS PHAGE SA97, COMPLETE GENOME. [25-AUG-2017]	STAPHYLOCOCCUS	NC_009632.1	STAPHYLOCOCCUS AUREUS SUBSP. AUREUS JH1, COMPLETE GENOME	STAPHYLOCOCCUS
-1.38552	KJ716335.1	DICKEYA PHAGE RC-2014, COMPLETE GENOME. [25-AUG-2017]	DICKEYA	CP007142.1	GYNUELLA SUNSHINYII YC6258, COMPLETE GENOME	GYNUELLA
-1.37412	KJ722067.1	PROPIONIBACTERIUM PHAGE PACNES 2012-15, COMPLETE GENOME. [26-MAY-2017]	PROPIONIBACTERIUM	NC_022198.1	CORYNEBACTERIUM ARGENTORATENSE DSM 44202, COMPLETE GENOME	CORYNEBACTERIUM
-1.27803	KJ725374.1	MYCOBACTERIUM PHAGE GUO1, COMPLETE GENOME. [25-AUG-2017]	MYCOBACTERIUM	NC_016946.1	MYCOBACTERIUM INTRACELLULARE ATCC 13950, COMPLETE GENOME	MYCOBACTERIUM
-1.3313	KJ743987.1	SINORHIZOBIUM PHAGE PHILM21, COMPLETE GENOME. [25-AUG-2017]	SINORHIZOBIUM	NC_018000.1	SINORHIZOBIUM FREDII USDA 257, COMPLETE GENOME	SINORHIZOBIUM
-1.3134	KJ746502.1	RHIZOBIUM PHAGE VB_RLEM_PPF1, COMPLETE GENOME. [26-MAY-2017]	RHIZOBIUM	NC_018000.1	SINORHIZOBIUM FREDII USDA 257, COMPLETE GENOME	SINORHIZOBIUM
-1.39929	KJ748011.1	ESCHERICHIA PHAGE PE3-1, COMPLETE GENOME. [26-MAY-2017]	ESCHERICHIA	CP002122.1	PREVOTELLA MELANINOGENICA ATCC 25845 CHROMOSOME I, COMPLETE SEQUENCE	PREVOTELLA
-1.38057	KJ749827.1	ESCHERICHIA PHAGE ECBP5, COMPLETE GENOME. [26-MAY-2017]	ESCHERICHIA	NC_010506.1	SHEWANELLA WOODYI ATCC 51908, COMPLETE GENOME	SHEWANELLA
-1.34792	KJ801817.1	ENTEROCOCCUS PHAGE ECP3, COMPLETE GENOME. [25-AUG-2017]	ENTEROCOCCUS	CP010817.1	MYROIDES PROFUNDI STRAIN D25, COMPLETE GENOME	MYROIDES
-1.36801	KJ802832.1	SALMONELLA PHAGE 9NA, COMPLETE GENOME. [26-MAY-2017]	SALMONELLA	NC_013132.1	CHITINOPHAGA PINENSIS DSM 2588, COMPLETE GENOME	CHITINOPHAGA
-1.29522	KJ804259.1	STAPHYLOCOCCUS PHAGE 6EC, COMPLETE GENOME. [25-AUG-2017]	STAPHYLOCOCCUS	FN665652.1	CLOSTRIDIUM DIFFICILE COMPLETE GENOME, STRAIN CF5	CLOSTRIDIUM
-1.35386	KJ817802.1	ACINETOBACTER PHAGE YMC-13-01-C62, COMPLETE GENOME. [25-AUG-2017]	ACINETOBACTER	NC_017171.1	ACINETOBACTER BAUMANNII MDR-ZJ06, COMPLETE GENOME	ACINETOBACTER
-1.36073	KJ832078.1	ENTEROBACTERIA PHAGE SF101, COMPLETE GENOME. [25-AUG-2017]	ENTEROBACTERIA	CP005998.1	ESCHERICHIA COLI B7A, COMPLETE GENOME	ESCHERICHIA
-1.38021	KJ847052.1	IDIOMARINACEAE PHAGE 1N2-2, COMPLETE GENOME. [25-AUG-2017]	IDIOMARINACEAE	NC_012997.1	TEREDINIBACTER TURNERAE T7901, COMPLETE GENOME	TEREDINIBACTER
-1.38612	KJ858521.1	AEROMONAS PHAGE PAH6-C, COMPLETE GENOME. [25-AUG-2017]	AEROMONAS	NC_014008.1	CORALIOMARGARITA AKAJIMENSIS DSM 45221, COMPLETE GENOME	CORALIOMARGARITA
-1.30238	KJ888149.1	STAPHYLOCOCCUS PHAGE MCE-2014, COMPLETE GENOME. [25-AUG-2017]	STAPHYLOCOCCUS	FN665652.1	CLOSTRIDIUM DIFFICILE COMPLETE GENOME, STRAIN CF5	CLOSTRIDIUM
-1.33162	KJ909655.1	ESCHERICHIA STX1-CONVERTING RECOMBINANT PHAGE HUN/2013, COMPLETE GENOME. [26-MAY-2017]	ESCHERICHIA	NC_002695.1	ESCHERICHIA COLI O157:H7 STR. SAKAI, COMPLETE GENOME	ESCHERICHIA
-1.33552	KJ920400.1	BACILLUS PHAGE WAUKESHA92, COMPLETE GENOME. [25-AUG-2017]	BACILLUS	NC_012581.1	BACILLUS ANTHRACIS STR. CDC 684, COMPLETE GENOME	BACILLUS
-1.26465	KJ944841.1	MYCOBACTERIUM PHAGE CHEETOBRO, COMPLETE GENOME. [26-MAY-2017]	MYCOBACTERIUM	NC_018027.1	MYCOBACTERIUM CHUBUENSE NBB4, COMPLETE GENOME	MYCOBACTERIUM
-1.31469	KJ959632.1	MYCOBACTERIUM PHAGE EQUEMIOH13, COMPLETE GENOME. [25-AUG-2017]	MYCOBACTERIUM	CP009914.1	MYCOBACTERIUM SP. VKM AC-1817D, COMPLETE GENOME	MYCOBACTERIUM
-1.37705	KM044272.1	PHAGE VB_ECOP_SU10, COMPLETE GENOME. [25-AUG-2017]	PHAGE	CP009279.1	PAENIBACILLUS SP. FSL H7-0737, COMPLETE GENOME	PAENIBACILLUS
-1.38109	KM051843.1	BACILLUS PHAGE BOBB, COMPLETE GENOME. [25-AUG-2017]	BACILLUS	CP010976.1	PAENIBACILLUS SP. IHBB 10380, COMPLETE GENOME	PAENIBACILLUS
-1.34254	KM066034.1	MYCOBACTERIUM PHAGE INVENTUM, COMPLETE GENOME	MYCOBACTERIUM	AP014547.1	MYCOBACTERIUM ABSCESSUS SUBSP. BOLLETII CCUG 48898 = JCM 15300 DNA, COMPLETE GENOME	MYCOBACTERIUM
-1.33567	KM067278.1	PSEUDOMONAS PHAGE VB_PAEP_PPA-ABTNL, COMPLETE GENOME. [26-MAY-2017]	PSEUDOMONAS	NC_022738.1	PSEUDOMONAS SP. VLB120, COMPLETE GENOME	PSEUDOMONAS
-1.2964	KM083128.1	MYCOBACTERIUM PHAGE SPARKY, COMPLETE GENOME. [25-AUG-2017]	MYCOBACTERIUM	NC_016604.1	MYCOBACTERIUM RHODESIAE NBB3, COMPLETE GENOME	MYCOBACTERIUM
-1.34336	KM091442.1	LACTOCOCCUS PHAGE PHI15, COMPLETE GENOME. [25-AUG-2017]	LACTOCOCCUS	CP007208.1	STAPHYLOCOCCUS XYLOSUS STRAIN HKUOPL8, COMPLETE GENOME	STAPHYLOCOCCUS
-1.34576	KM091443.1	LACTOCOCCUS PHAGE PHI93, COMPLETE GENOME. [25-AUG-2017]	LACTOCOCCUS	NC_018500.1	BACILLUS THURINGIENSIS HD-771, COMPLETE GENOME	BACILLUS
-1.34425	KM091444.1	LACTOCOCCUS PHAGE PHI145, COMPLETE GENOME. [25-AUG-2017]	LACTOCOCCUS	NC_018500.1	BACILLUS THURINGIENSIS HD-771, COMPLETE GENOME	BACILLUS
-1.3665	KM092515.1	ESCHERICHIA PHAGE HY02, COMPLETE GENOME	ESCHERICHIA	CP007631.2	STREPTOCOCCUS AGALACTIAE STRAIN NGBS061, COMPLETE GENOME	STREPTOCOCCUS
-1.34121	KM101118.1	MYCOBACTERIUM PHAGE SWIRLEY, COMPLETE GENOME	MYCOBACTERIUM	NC_012490.1	RHODOCOCCUS ERYTHROPOLIS PR4 DNA, COMPLETE GENOME	RHODOCOCCUS
-1.31692	KM101119.1	MYCOBACTERIUM PHAGE TIFFANY, COMPLETE GENOME	MYCOBACTERIUM	CP009914.1	MYCOBACTERIUM SP. VKM AC-1817D, COMPLETE GENOME	MYCOBACTERIUM
-1.3153	KM101120.1	MYCOBACTERIUM PHAGE TRIKE, COMPLETE GENOME	MYCOBACTERIUM	CP009914.1	MYCOBACTERIUM SP. VKM AC-1817D, COMPLETE GENOME	MYCOBACTERIUM
-1.34137	KM101122.1	MYCOBACTERIUM PHAGE HADES, COMPLETE GENOME	MYCOBACTERIUM	CU458896.1	MYCOBACTERIUM ABSCESSUS ATCC 19977 CHROMOSOME, COMPLETE SEQUENCE	MYCOBACTERIUM
-1.35592	KM101123.1	MYCOBACTERIUM PHAGE MINERVA, COMPLETE GENOME	MYCOBACTERIUM	AP014547.1	MYCOBACTERIUM ABSCESSUS SUBSP. BOLLETII CCUG 48898 = JCM 15300 DNA, COMPLETE GENOME	MYCOBACTERIUM
-1.33198	KM101124.1	MYCOBACTERIUM PHAGE SQUIRTY, COMPLETE GENOME. [25-AUG-2017]	MYCOBACTERIUM	NC_019966.1	MYCOBACTERIUM SP. JS623, COMPLETE GENOME	MYCOBACTERIUM
-1.3704	KM190144.1	ESCHERICHIA PHAGE AV-05, COMPLETE GENOME. [25-AUG-2017]	ESCHERICHIA	CP009278.1	SPHINGOBACTERIUM SP. ML3W, COMPLETE GENOME	SPHINGOBACTERIUM
-1.3166	KM197169.1	MYCOBACTERIUM PHAGE PIRO94, COMPLETE GENOME	MYCOBACTERIUM	CP009914.1	MYCOBACTERIUM SP. VKM AC-1817D, COMPLETE GENOME	MYCOBACTERIUM
-1.36439	KM199770.1	RHIZOBIUM PHAGE VB_RLEM_P10VF, COMPLETE GENOME	RHIZOBIUM	NC_022795.1	PSEUDOTHERMOTOGA HYPOGEA DSM 11164 = NBRC 106472 DNA, COMPLETE GENOME	PSEUDOTHERMOTOGA
-1.34306	KM199771.1	MESORHIZOBIUM PHAGEVB_MLOP_LO5R7ANS, COMPLETE GENOME	MESORHIZOBIUM	FO082820.1	RHIZOBIUM SP. NT-26 CHROMOSOME, COMPLETE GENOME	RHIZOBIUM
-1.38565	KM209228.1	DICKEYA PHAGE PHID3, COMPLETE GENOME	DICKEYA	CP007142.1	GYNUELLA SUNSHINYII YC6258, COMPLETE GENOME	GYNUELLA
-1.30009	KM216423.1	STAPHYLOCOCCUS PHAGE P108, COMPLETE GENOME	STAPHYLOCOCCUS	FN665652.1	CLOSTRIDIUM DIFFICILE COMPLETE GENOME, STRAIN CF5	CLOSTRIDIUM
-1.3839	KM224878.1	VIBRIO PHAGE ICP2_2011_A, COMPLETE GENOME. [26-MAY-2017]	VIBRIO	NC_010628.1	NOSTOC PUNCTIFORME PCC 73102, COMPLETE GENOME	NOSTOC
-1.38359	KM224879.1	VIBRIO PHAGE ICP2_2013_A_HAITI, COMPLETE GENOME. [26-MAY-2017]	VIBRIO	FM954972.2	VIBRIO SPLENDIDUS LGP32 CHROMOSOME 1	VIBRIO
-1.3718	KM233151.1	ENTEROBACTERIA PHAGE EK99P-1, COMPLETE GENOME	ENTEROBACTERIA	AP014565.1	SALMONELLA ENTERICA SUBSP. ENTERICA SEROVAR TYPHIMURIUM STR. L-3553 DNA, COMPLETE GENOME	SALMONELLA
-1.36131	KM233261.1	SULFITOBACTER PHAGE NYA-2014A, COMPLETE GENOME. [25-AUG-2017]	SULFITOBACTER	NC_008209.1	ROSEOBACTER DENITRIFICANS OCH 114, COMPLETE GENOME	ROSEOBACTER
-1.31631	KM233454.1	MYCOBACTERIUM PHAGE MARQUARDT, COMPLETE GENOME. [25-AUG-2017]	MYCOBACTERIUM	NC_016604.1	MYCOBACTERIUM RHODESIAE NBB3, COMPLETE GENOME	MYCOBACTERIUM
-1.3764	KM236237.1	CITROBACTER PHAGE MILLER, COMPLETE GENOME	CITROBACTER	NC_013132.1	CHITINOPHAGA PINENSIS DSM 2588, COMPLETE GENOME	CHITINOPHAGA
-1.36667	KM236239.1	CITROBACTER PHAGE MOOGLE, COMPLETE GENOME. [25-AUG-2017]	CITROBACTER	CP002888.1	STREPTOCOCCUS SALIVARIUS 57.I, COMPLETE GENOME	STREPTOCOCCUS
-1.36653	KM236240.1	CITROBACTER PHAGE MOON, COMPLETE GENOME. [25-AUG-2017]	CITROBACTER	NC_015321.1	FLUVIICOLA TAFFENSIS DSM 16823, COMPLETE GENOME	FLUVIICOLA
-1.36707	KM236241.1	CITROBACTER PHAGE STEVIE, COMPLETE GENOME. [25-AUG-2017]	CITROBACTER	FO704551.1	XENORHABDUS POINARII STR. G6 CHROMOSOME, COMPLETE GENOME	XENORHABDUS
-1.34224	KM236242.1	ESCHERICHIA PHAGE POLLOCK, COMPLETE GENOME. [25-AUG-2017]	ESCHERICHIA	NC_015275.1	CLOSTRIDIUM LENTOCELLUM DSM 5427, COMPLETE GENOME	CLOSTRIDIUM
-1.38158	KM236243.1	ESCHERICHIA PHAGE SEURAT, COMPLETE GENOME. [26-MAY-2017]	ESCHERICHIA	CP009279.1	PAENIBACILLUS SP. FSL H7-0737, COMPLETE GENOME	PAENIBACILLUS
-1.37448	KM236244.1	SALMONELLA PHAGE STITCH, COMPLETE GENOME. [25-AUG-2017]	SALMONELLA	CP009279.1	PAENIBACILLUS SP. FSL H7-0737, COMPLETE GENOME	PAENIBACILLUS
-1.37091	KM236245.1	BACILLUS PHAGE MATER, COMPLETE GENOME. [25-AUG-2017]	BACILLUS	CP010817.1	MYROIDES PROFUNDI STRAIN D25, COMPLETE GENOME	MYROIDES
-1.3801	KM236246.1	BACILLUS PHAGE MOONBEAM, COMPLETE GENOME. [25-AUG-2017]	BACILLUS	CP010976.1	PAENIBACILLUS SP. IHBB 10380, COMPLETE GENOME	PAENIBACILLUS
-1.35951	KM236247.1	BACILLUS PHAGE PASCAL, COMPLETE GENOME. [25-AUG-2017]	BACILLUS	NC_014103.1	BACILLUS MEGATERIUM DSM319, COMPLETE GENOME	BACILLUS
-1.36251	KM236248.1	BACILLUS PHAGE POOKIE, COMPLETE GENOME. [25-AUG-2017]	BACILLUS	CP009920.1	BACILLUS MEGATERIUM NBRC 15308 = ATCC 14581, COMPLETE GENOME	BACILLUS
-1.28142	KM236502.1	MYCOBACTERIUM PHAGE EREMOS, COMPLETE GENOME. [26-MAY-2017]	MYCOBACTERIUM	NC_018289.1	MYCOBACTERIUM SMEGMATIS STR. MC2 155, COMPLETE GENOME	MYCOBACTERIUM
-1.39889	KM242061.1	ESCHERICHIA PHAGE CICC 80001, COMPLETE GENOME. [25-AUG-2017]	ESCHERICHIA	CP002122.1	PREVOTELLA MELANINOGENICA ATCC 25845 CHROMOSOME I, COMPLETE SEQUENCE	PREVOTELLA
-1.37249	KM247287.1	ENTEROBACTERIA PHAGE J8-65, COMPLETE GENOME. [26-MAY-2017]	ENTEROBACTERIA	CP007152.1	MARINOBACTER SALARIUS STRAIN R9SW1, COMPLETE GENOME	MARINOBACTER
-1.39457	KM253764.1	YERSINIA PHAGE VB_YENP_AP5, COMPLETE GENOME. [25-AUG-2017]	YERSINIA	NC_014008.1	CORALIOMARGARITA AKAJIMENSIS DSM 45221, COMPLETE GENOME	CORALIOMARGARITA
-1.35576	KM262191.1	LEUCONOSTOC PHAGE LN-8, COMPLETE GENOME	LEUCONOSTOC	CP007208.1	STAPHYLOCOCCUS XYLOSUS STRAIN HKUOPL8, COMPLETE GENOME	STAPHYLOCOCCUS
-1.3585	KM262192.1	LEUCONOSTOC PHAGE LN-9, COMPLETE GENOME	LEUCONOSTOC	CP007208.1	STAPHYLOCOCCUS XYLOSUS STRAIN HKUOPL8, COMPLETE GENOME	STAPHYLOCOCCUS
-1.39105	KM272358.1	SALMONELLA PHAGE LSPA1, COMPLETE GENOME. [25-AUG-2017]	SALMONELLA	CP009166.1	ESCHERICHIA COLI 1303, COMPLETE GENOME	ESCHERICHIA
-1.34019	KM279937.1	MYCOBACTERIOPHAGE ESTAVE1, COMPLETE GENOME. [26-MAY-2017]	MYCOBACTERIUM	AP014547.1	MYCOBACTERIUM ABSCESSUS SUBSP. BOLLETII CCUG 48898 = JCM 15300 DNA, COMPLETE GENOME	MYCOBACTERIUM
-1.3153	KM289195.1	STREPTOCOCCUS PHAGE T12, COMPLETE GENOME. [25-AUG-2017]	STREPTOCOCCUS	NC_004606.1	STREPTOCOCCUS PYOGENES SSI-1 DNA, COMPLETE GENOME	STREPTOCOCCUS
-1.34363	KM347889.1	MYCOBACTERIUM PHAGE BUZZLYSEYEAR, COMPLETE GENOME. [26-MAY-2017]	MYCOBACTERIUM	CP009408.1	MYCOBACTERIUM ABSCESSUS SUBSP. BOLLETII STRAIN MA 1948, COMPLETE GENOME	MYCOBACTERIUM
-1.32408	KM359505.1	PROCHLOROCOCCUS PHAGE P-TIM68, COMPLETE GENOME	PROCHLOROCOCCUS	NC_020291.1	CLOSTRIDIUM SACCHAROPERBUTYLACETONICUM N1-4(HMT), COMPLETE GENOME	CLOSTRIDIUM
-1.34867	KM360178.1	ESCHERICHIA PHAGE VB_ECOM-EP3, COMPLETE GENOME. [25-AUG-2017]	ESCHERICHIA	NC_015968.1	ENTEROBACTER ASBURIAE LF7A, COMPLETE GENOME	ENTEROBACTER
-1.31057	KM363596.1	MYCOBACTERIOPHAGE OMNICRON, COMPLETE GENOME. [26-MAY-2017]	MYCOBACTERIUM	NC_019966.1	MYCOBACTERIUM SP. JS623, COMPLETE GENOME	MYCOBACTERIUM
-1.39567	KM366096.1	SALMONELLA PHAGE BP12A, COMPLETE GENOME	SALMONELLA	NC_014033.1	PREVOTELLA RUMINICOLA 23, COMPLETE GENOME	PREVOTELLA
-1.38903	KM366097.1	SALMONELLA PHAGE BP12B, COMPLETE GENOME	SALMONELLA	CP009621.1	PONTIBACTER KORLENSIS STRAIN X14-1T, COMPLETE GENOME	PONTIBACTER
-1.36219	KM366098.1	SALMONELLA PHAGE BP12C, COMPLETE GENOME	SALMONELLA	CP007546.1	ENTEROBACTER ASBURIAE L1, COMPLETE GENOME	ENTEROBACTER
-1.38871	KM366099.1	SALMONELLA PHAGE BP63, COMPLETE GENOME	SALMONELLA	CP003241.1	VIBRIO SP. EJY3 CHROMOSOME 1, COMPLETE SEQUENCE	VIBRIO
-1.29479	KM366100.1	STAPHYLOCOCCUS PHAGE BP39, COMPLETE GENOME	STAPHYLOCOCCUS	CP007447.1	STAPHYLOCOCCUS AUREUS STRAIN XN108, COMPLETE GENOME	STAPHYLOCOCCUS
-1.39714	KM370384.1	LELLIOTTIA PHAGE PHD2B, COMPLETE GENOME. [26-MAY-2017]	LELLIOTTIA	NC_015311.1	PREVOTELLA DENTICOLA F0289, COMPLETE GENOME	PREVOTELLA
-1.39183	KM378617.2	VIBRIO PHAGE VPKK5, COMPLETE GENOME. [26-MAY-2017]	VIBRIO	NC_014008.1	CORALIOMARGARITA AKAJIMENSIS DSM 45221, COMPLETE GENOME	CORALIOMARGARITA
-1.35521	KM389210.1	UNVERIFIED: PSEUDOMONAS PHAGE DO4 CLONE CONTIG00001 GENOMIC SEQUENCE	PSEUDOMONAS	CP011317.1	PSEUDOMONAS AERUGINOSA STRAIN CARB01 63, COMPLETE GENOME	PSEUDOMONAS
-1.35716	KM389212.1	UNVERIFIED: PSEUDOMONAS PHAGE JBD88B CLONE CONTIG00001 GENOMIC SEQUENCE	PSEUDOMONAS	CP007441.1	PSEUDOMONAS STUTZERI STRAIN 28A24, COMPLETE GENOME	PSEUDOMONAS
-1.37409	KM389219.1	UNVERIFIED: PSEUDOMONAS PHAGE PEV32 CLONE CONTIG00001 GENOMIC SEQUENCE	PSEUDOMONAS	NC_016631.1	GRANULICELLA MALLENSIS MP5ACTX8, COMPLETE GENOME	GRANULICELLA
-1.35824	KM389220.1	UNVERIFIED: PSEUDOMONAS PHAGE PEV32 CLONE CONTIG00002 GENOMIC SEQUENCE	PSEUDOMONAS	CP007151.1	MARINOBACTER SIMILIS STRAIN A3D10, COMPLETE GENOME	MARINOBACTER
-1.34476	KM389252.1	UNVERIFIED: ESCHERICHIA PHAGE PHI05_2388 B CLONE CONTIG00001 GENOMIC SEQUENCE	ESCHERICHIA	NC_017628.1	ESCHERICHIA COLI IHE3034, COMPLETE GENOME	ESCHERICHIA
-1.32484	KM389266.1	UNVERIFIED: PSEUDOMONAS PHAGE JBD68 CLONE CONTIG00001 GENOMIC SEQUENCE	PSEUDOMONAS	NC_023019.1	PSEUDOMONAS AERUGINOSA MTB-1, COMPLETE GENOME	PSEUDOMONAS
-1.34514	KM389267.1	UNVERIFIED: PSEUDOMONAS PHAGE JBD68 CLONE CONTIG00002 GENOMIC SEQUENCE	PSEUDOMONAS	CP007441.1	PSEUDOMONAS STUTZERI STRAIN 28A24, COMPLETE GENOME	PSEUDOMONAS
-1.3117	KM389280.1	UNVERIFIED: STAPHYLOCOCCUS PHAGE PHI06_2986 B CLONE CONTIG00001 GENOMIC SEQUENCE	STAPHYLOCOCCUS	NC_009641.1	STAPHYLOCOCCUS AUREUS SUBSP. AUREUS STR. NEWMAN DNA, COMPLETE GENOME	STAPHYLOCOCCUS
-1.28678	KM389337.1	UNVERIFIED: PSEUDOMONAS PHAGE JBD58A CLONE CONTIG00002 GENOMIC SEQUENCE	PSEUDOMONAS	CP011317.1	PSEUDOMONAS AERUGINOSA STRAIN CARB01 63, COMPLETE GENOME	PSEUDOMONAS
-1.35304	KM389373.1	UNVERIFIED: PSEUDOMONAS PHAGE PEV31 CLONE CONTIG00001 GENOMIC SEQUENCE	PSEUDOMONAS	CP007151.1	MARINOBACTER SIMILIS STRAIN A3D10, COMPLETE GENOME	MARINOBACTER
-1.38201	KM389374.1	UNVERIFIED: PSEUDOMONAS PHAGE PEV31 CLONE CONTIG00002 GENOMIC SEQUENCE	PSEUDOMONAS	NC_014963.1	TERRIGLOBUS SAANENSIS SP1PR4, COMPLETE GENOME	TERRIGLOBUS
-1.31238	KM389416.1	UNVERIFIED: STAPHYLOCOCCUS PHAGE PHI06_3106 B CLONE CONTIG00001 GENOMIC SEQUENCE	STAPHYLOCOCCUS	CP006630.1	STAPHYLOCOCCUS AUREUS SUBSP. AUREUS SA268, COMPLETE GENOME	STAPHYLOCOCCUS
-1.31768	KM389417.1	UNVERIFIED: STAPHYLOCOCCUS PHAGE PHI06_3106 B CLONE CONTIG00002 GENOMIC SEQUENCE	STAPHYLOCOCCUS	NC_021670.1	STAPHYLOCOCCUS AUREUS BMB9393, COMPLETE GENOME	STAPHYLOCOCCUS
-1.34079	KM389435.1	UNVERIFIED: ESCHERICHIA PHAGE PHI05_1999 B CLONE CONTIG00002 GENOMIC SEQUENCE	ESCHERICHIA	NC_017628.1	ESCHERICHIA COLI IHE3034, COMPLETE GENOME	ESCHERICHIA
-1.29817	KM389459.1	UNVERIFIED: PSEUDOMONAS PHAGE F_ET309SP/PA1651 CLONE CONTIG00001 GENOMIC SEQUENCE	PSEUDOMONAS	CP011317.1	PSEUDOMONAS AERUGINOSA STRAIN CARB01 63, COMPLETE GENOME	PSEUDOMONAS
-1.27856	KM389461.1	UNVERIFIED: PSEUDOMONAS PHAGE F_TK432SP/PA1651 CLONE CTG7180000000005 GENOMIC SEQUENCE	PSEUDOMONAS	CP011317.1	PSEUDOMONAS AERUGINOSA STRAIN CARB01 63, COMPLETE GENOME	PSEUDOMONAS
-1.2746	KM389462.1	UNVERIFIED: PSEUDOMONAS PHAGE JBD23 CLONE CONTIG00001 GENOMIC SEQUENCE	PSEUDOMONAS	CP011317.1	PSEUDOMONAS AERUGINOSA STRAIN CARB01 63, COMPLETE GENOME	PSEUDOMONAS
-1.35477	KM389463.1	UNVERIFIED: PSEUDOMONAS PHAGE JBD94B CLONE CONTIG00001 GENOMIC SEQUENCE	PSEUDOMONAS	CP007441.1	PSEUDOMONAS STUTZERI STRAIN 28A24, COMPLETE GENOME	PSEUDOMONAS
-1.27452	KM389464.1	UNVERIFIED: PSEUDOMONAS PHAGE JBDS5 CLONE CONTIG00001 GENOMIC SEQUENCE	PSEUDOMONAS	CP011317.1	PSEUDOMONAS AERUGINOSA STRAIN CARB01 63, COMPLETE GENOME	PSEUDOMONAS
-1.34932	KM400683.1	MYCOBACTERIUM PHAGE ARIEL, COMPLETE GENOME. [25-AUG-2017]	MYCOBACTERIUM	AP014547.1	MYCOBACTERIUM ABSCESSUS SUBSP. BOLLETII CCUG 48898 = JCM 15300 DNA, COMPLETE GENOME	MYCOBACTERIUM
-1.34932	KM400683.2	MYCOBACTERIUM PHAGE ARIEL, COMPLETE GENOME	MYCOBACTERIUM	AP014547.1	MYCOBACTERIUM ABSCESSUS SUBSP. BOLLETII CCUG 48898 = JCM 15300 DNA, COMPLETE GENOME	MYCOBACTERIUM
-1.33548	KM401838.1	MYCOBACTERIUM PHAGE VOHMINGHAZI, COMPLETE GENOME. [25-AUG-2017]	MYCOBACTERIUM	NC_012490.1	RHODOCOCCUS ERYTHROPOLIS PR4 DNA, COMPLETE GENOME	RHODOCOCCUS
-1.34549	KM402757.1	MYCOBACTERIUM PHAGE LLAMA, COMPLETE GENOME. [26-MAY-2017]	MYCOBACTERIUM	NC_015564.1	HOYOSELLA SUBFLAVA DQS3-9A1, COMPLETE GENOME	HOYOSELLA
-1.36146	KM407600.1	SHIGELLA PHAGE SHF125875, COMPLETE GENOME. [25-AUG-2017]	SHIGELLA	NC_017770.1	SOLITALEA CANADENSIS DSM 3403, COMPLETE GENOME	SOLITALEA
-1.28274	KM408320.1	MYCOBACTERIUM PHAGE LASSO, COMPLETE GENOME. [26-MAY-2017]	MYCOBACTERIUM	NC_008596.1	MYCOBACTERIUM SMEGMATIS STR. MC2 155 CHROMOSOME, COMPLETE GENOME	MYCOBACTERIUM
-1.36908	KM411958.1	PSEUDOMONAS PHAGE RWG, COMPLETE GENOME. [26-MAY-2017]	PSEUDOMONAS	CP007151.1	MARINOBACTER SIMILIS STRAIN A3D10, COMPLETE GENOME	MARINOBACTER
-1.36987	KM411959.1	PSEUDOMONAS PHAGE PA2, COMPLETE GENOME. [26-MAY-2017]	PSEUDOMONAS	CP007151.1	MARINOBACTER SIMILIS STRAIN A3D10, COMPLETE GENOME	MARINOBACTER
-1.36963	KM411960.1	PSEUDOMONAS PHAGE PHI176, COMPLETE GENOME. [26-MAY-2017]	PSEUDOMONAS	CP007151.1	MARINOBACTER SIMILIS STRAIN A3D10, COMPLETE GENOME	MARINOBACTER
-1.38285	KM434186.1	PSEUDOMONAS PHAGE VB_PAEM_PS24, COMPLETE GENOME	PSEUDOMONAS	CP007152.1	MARINOBACTER SALARIUS STRAIN R9SW1, COMPLETE GENOME	MARINOBACTER
-1.36085	KM458633.1	SALMONELLA PHAGE CHI, COMPLETE GENOME. [26-MAY-2017]	SALMONELLA	CP008823.1	ENTEROBACTER CLOACAE ECNIH2, COMPLETE GENOME	ENTEROBACTER
-1.34547	KM501444.1	SHIGELLA PHAGE PSS-1, COMPLETE GENOME. [25-AUG-2017]	SHIGELLA	NC_021670.1	STAPHYLOCOCCUS AUREUS BMB9393, COMPLETE GENOME	STAPHYLOCOCCUS
-1.34111	KM507819.1	ESCHERICHIA PHAGE 121Q, COMPLETE GENOME. [25-AUG-2017]	ESCHERICHIA	NC_017331.1	STAPHYLOCOCCUS AUREUS SUBSP. AUREUS TW20, COMPLETE GENOME	STAPHYLOCOCCUS
-1.36347	KM514685.1	LACTOBACILLUS PHAGE LDL1, COMPLETE GENOME. [25-AUG-2017]	LACTOBACILLUS	NC_015558.1	STREPTOCOCCUS PARAUBERIS KCTC 11537, COMPLETE GENOME	STREPTOCOCCUS
-1.32192	KM581061.1	RUEGERIA PHAGE DSS3-P1, COMPLETE GENOME. [26-MAY-2017]	RUEGERIA	NC_019892.1	SINGULISPHAERA ACIDIPHILA DSM 18658, COMPLETE GENOME	SINGULISPHAERA
-1.27938	KM588359.1	MYCOBACTERIUM PHAGE CARCHARODON, COMPLETE GENOME. [25-AUG-2017]	MYCOBACTERIUM	NC_018289.1	MYCOBACTERIUM SMEGMATIS STR. MC2 155, COMPLETE GENOME	MYCOBACTERIUM
-1.34086	KM589498.1	GOKUSHOVIRINAE BOG1183_53, COMPLETE GENOME	GOKUSHOVIRINAE	AP014583.1	WINOGRADSKYELLA SP. PG-2 DNA, COMPLETE GENOME	WINOGRADSKYELLA
-1.38438	KM589499.1	MICROVIRIDAE BOG1249_12, COMPLETE GENOME	MICROVIRIDAE	CP009531.1	LACTOBACILLUS SP. WKB8, COMPLETE GENOME	LACTOBACILLUS
-1.38452	KM589500.1	MICROVIRIDAE BOG5275_51, COMPLETE GENOME	MICROVIRIDAE	NC_018692.1	ALTEROMONAS MACLEODII STR. 'BLACK SEA 11', COMPLETE GENOME	ALTEROMONAS
-1.38862	KM589501.1	GOKUSHOVIRINAE BOG5712_52, COMPLETE GENOME	GOKUSHOVIRINAE	CP008924.1	CORYNEBACTERIUM PSEUDOTUBERCULOSIS STRAIN FT_2193/67, COMPLETE GENOME	CORYNEBACTERIUM
-1.36288	KM589502.1	GOKUSHOVIRINAE BOG8989_22, COMPLETE GENOME	GOKUSHOVIRINAE	CP000020.2	VIBRIO FISCHERI ES114 CHROMOSOME I, COMPLETE SEQUENCE	VIBRIO
-1.37327	KM589503.1	MICROVIRIDAE BOG9017_22, COMPLETE GENOME	MICROVIRIDAE	NC_017768.1	STREPTOCOCCUS MUTANS LJ23 DNA, COMPLETE GENOME	STREPTOCOCCUS
-1.36206	KM589504.1	MICROVIRIDAE FEN2266_11, COMPLETE GENOME	MICROVIRIDAE	CP008852.1	PELOSINUS SP. UFO1, COMPLETE GENOME	PELOSINUS
-1.38095	KM589505.1	MICROVIRIDAE FEN418_41, COMPLETE GENOME	MICROVIRIDAE	NC_020514.1	PARAGLACIECOLA PSYCHROPHILA 170, COMPLETE GENOME	PARAGLACIECOLA
-1.37957	KM589506.1	MICROVIRIDAE FEN4707_41, COMPLETE GENOME	MICROVIRIDAE	NC_015277.1	SPHINGOBACTERIUM SP. 21, COMPLETE GENOME	SPHINGOBACTERIUM
-1.39156	KM589508.1	GOKUSHOVIRINAE FEN672_31, COMPLETE GENOME	GOKUSHOVIRINAE	NC_013421.1	PECTOBACTERIUM PARMENTIERI WPP163, COMPLETE GENOME	PECTOBACTERIUM
-1.38524	KM589509.1	MICROVIRIDAE FEN685_11, COMPLETE GENOME	MICROVIRIDAE	NC_008750.1	SHEWANELLA SP. W3-18-1, COMPLETE GENOME	SHEWANELLA
-1.37221	KM589510.1	MICROVIRIDAE FEN7786_21, COMPLETE GENOME	MICROVIRIDAE	CP009281.1	PAENIBACILLUS SP. FSL R5-0345, COMPLETE GENOME	PAENIBACILLUS
-1.38226	KM589511.1	GOKUSHOVIRINAE FEN7875_21, COMPLETE GENOME	GOKUSHOVIRINAE	NC_018268.1	MARINOBACTER SP. BSS20148, COMPLETE GENOME	MARINOBACTER
-1.38257	KM589512.1	MICROVIRIDAE FEN7895_21, COMPLETE GENOME	MICROVIRIDAE	NC_013721.1	GARDNERELLA VAGINALIS 409-05, COMPLETE GENOME	GARDNERELLA
-1.38804	KM589513.1	MICROVIRIDAE FEN7918_21, COMPLETE GENOME	MICROVIRIDAE	CP010048.1	BLOCHMANNIA ENDOSYMBIONT OF POLYRHACHIS (HEDOMYRMA) TURNERI STRAIN 675, COMPLETE GENOME	BLOCHMANNIA
-1.3979	KM589514.1	MICROVIRIDAE FEN7940_21, COMPLETE GENOME	MICROVIRIDAE	CP000272.1	PARABURKHOLDERIA XENOVORANS LB400 CHROMOSOME 3, COMPLETE SEQUENCE	PARABURKHOLDERIA
-1.36974	KM589515.1	PARABACTEROIDES PHAGE YZ-2015A, COMPLETE GENOME	PARABACTEROIDES	NC_009615.1	PARABACTEROIDES DISTASONIS ATCC 8503, COMPLETE GENOME	PARABACTEROIDES
-1.36765	KM589516.1	PARABACTEROIDES PHAGE YZ-2015B, COMPLETE GENOME	PARABACTEROIDES	NC_004663.1	BACTEROIDES THETAIOTAOMICRON VPI-5482 CHROMOSOME, COMPLETE GENOME	BACTEROIDES
-1.31477	KM591906.1	MYCOBACTERIUM PHAGE SWEETIEPIE, COMPLETE GENOME. [25-AUG-2017]	MYCOBACTERIUM	NC_016604.1	MYCOBACTERIUM RHODESIAE NBB3, COMPLETE GENOME	MYCOBACTERIUM
-1.31479	KM591906.2	MYCOBACTERIUM PHAGE SWEETIEPIE, COMPLETE GENOME	MYCOBACTERIUM	NC_016604.1	MYCOBACTERIUM RHODESIAE NBB3, COMPLETE GENOME	MYCOBACTERIUM
-1.34218	KM597530.1	MYCOBACTERIUM PHAGE BIPOLAR, COMPLETE GENOME. [26-MAY-2017]	MYCOBACTERIUM	CP009408.1	MYCOBACTERIUM ABSCESSUS SUBSP. BOLLETII STRAIN MA 1948, COMPLETE GENOME	MYCOBACTERIUM
-1.32285	KM597531.1	MYCOBACTERIUM PHAGE ABROGATE, COMPLETE GENOME. [25-AUG-2017]	MYCOBACTERIUM	NC_016604.1	MYCOBACTERIUM RHODESIAE NBB3, COMPLETE GENOME	MYCOBACTERIUM
-1.34454	KM606994.1	ENTEROBACTERIA PHAGE RB3, COMPLETE GENOME. [25-AUG-2017]	ENTEROBACTERIA	CP007447.1	STAPHYLOCOCCUS AUREUS STRAIN XN108, COMPLETE GENOME	STAPHYLOCOCCUS
-1.34453	KM606995.1	ENTEROBACTERIA PHAGE RB5, COMPLETE GENOME. [25-AUG-2017]	ENTEROBACTERIA	CP007447.1	STAPHYLOCOCCUS AUREUS STRAIN XN108, COMPLETE GENOME	STAPHYLOCOCCUS
-1.34453	KM606996.1	ENTEROBACTERIA PHAGE RB6, COMPLETE GENOME. [25-AUG-2017]	ENTEROBACTERIA	CP007447.1	STAPHYLOCOCCUS AUREUS STRAIN XN108, COMPLETE GENOME	STAPHYLOCOCCUS
-1.34454	KM606997.1	ENTEROBACTERIA PHAGE RB7, COMPLETE GENOME. [25-AUG-2017]	ENTEROBACTERIA	CP007447.1	STAPHYLOCOCCUS AUREUS STRAIN XN108, COMPLETE GENOME	STAPHYLOCOCCUS
-1.34454	KM606998.1	ENTEROBACTERIA PHAGE RB9, COMPLETE GENOME. [25-AUG-2017]	ENTEROBACTERIA	AP014583.1	WINOGRADSKYELLA SP. PG-2 DNA, COMPLETE GENOME	WINOGRADSKYELLA
-1.34451	KM607001.1	ENTEROBACTERIA PHAGE RB33, COMPLETE GENOME. [25-AUG-2017]	ENTEROBACTERIA	AP014583.1	WINOGRADSKYELLA SP. PG-2 DNA, COMPLETE GENOME	WINOGRADSKYELLA
-1.34462	KM607002.1	ENTEROBACTERIA PHAGE RB55, COMPLETE GENOME. [25-AUG-2017]	ENTEROBACTERIA	CP007447.1	STAPHYLOCOCCUS AUREUS STRAIN XN108, COMPLETE GENOME	STAPHYLOCOCCUS
-1.34462	KM607003.1	ENTEROBACTERIA PHAGE RB59, COMPLETE GENOME. [25-AUG-2017]	ENTEROBACTERIA	CP007447.1	STAPHYLOCOCCUS AUREUS STRAIN XN108, COMPLETE GENOME	STAPHYLOCOCCUS
-1.34339	KM607004.1	ENTEROBACTERIA PHAGE RB68, COMPLETE GENOME. [25-AUG-2017]	ENTEROBACTERIA	NC_017331.1	STAPHYLOCOCCUS AUREUS SUBSP. AUREUS TW20, COMPLETE GENOME	STAPHYLOCOCCUS
-1.39075	KM612259.1	VIBRIO PHAGE QH, COMPLETE GENOME. [26-MAY-2017]	VIBRIO	BA000031.2	VIBRIO PARAHAEMOLYTICUS RIMD 2210633 DNA, CHROMOSOME 1, COMPLETE SEQUENCE	VIBRIO
-1.3899	KM612264.1	VIBRIO PHAGE J2, COMPLETE GENOME. [26-MAY-2017]	VIBRIO	CP002377.1	VIBRIO FURNISSII NCTC 11218 CHROMOSOME 1, COMPLETE SEQUENCE	VIBRIO
-1.34159	KM652553.1	MYCOBACTERIUM PHAGE CAPTAINTRIPS, COMPLETE GENOME. [26-MAY-2017]	MYCOBACTERIUM	AP014547.1	MYCOBACTERIUM ABSCESSUS SUBSP. BOLLETII CCUG 48898 = JCM 15300 DNA, COMPLETE GENOME	MYCOBACTERIUM
-1.39373	KM652554.1	STREPTOMYCES PHAGE JAY2JAY, COMPLETE GENOME. [25-AUG-2017]	STREPTOMYCES	NC_015152.1	SPHAEROCHAETA GLOBOSA STR. BUDDY, COMPLETE GENOME	SPHAEROCHAETA
-1.36735	KM657822.1	ESCHERICHIA PHAGE VB_ECOM-VPAE1, COMPLETE GENOME. [25-AUG-2017]	ESCHERICHIA	NC_010001.1	LACHNOCLOSTRIDIUM PHYTOFERMENTANS ISDG, COMPLETE GENOME	LACHNOCLOSTRIDIUM
-1.35859	KM672662.1	ACINETOBACTER PHAGE YMC13/03/R2096, COMPLETE GENOME. [25-AUG-2017]	ACINETOBACTER	AP014583.1	WINOGRADSKYELLA SP. PG-2 DNA, COMPLETE GENOME	WINOGRADSKYELLA
-1.32499	KM677185.1	LACTOCOCCUS PHAGE WRP3, COMPLETE GENOME. [25-AUG-2017]	LACTOCOCCUS	NC_014393.1	CLOSTRIDIUM CELLULOVORANS 743B, COMPLETE GENOME	CLOSTRIDIUM
-1.31412	KM677210.1	MYCOBACTERIUM PHAGE LARENN, COMPLETE GENOME. [25-AUG-2017]	MYCOBACTERIUM	CP009914.1	MYCOBACTERIUM SP. VKM AC-1817D, COMPLETE GENOME	MYCOBACTERIUM
-1.28734	KM677211.1	MYCOBACTERIUM PHAGE MURUCUTUMBU, COMPLETE GENOME. [26-MAY-2017]	MYCOBACTERIUM	NC_019966.1	MYCOBACTERIUM SP. JS623, COMPLETE GENOME	MYCOBACTERIUM
-1.37913	KM819694.1	PROTEUS PHAGE PM 75, COMPLETE GENOME	PROTEUS	CP010817.1	MYROIDES PROFUNDI STRAIN D25, COMPLETE GENOME	MYROIDES
-1.36295	KM819695.1	PROTEUS PHAGE PM 85, COMPLETE GENOME	PROTEUS	NC_015275.1	CLOSTRIDIUM LENTOCELLUM DSM 5427, COMPLETE GENOME	CLOSTRIDIUM
[truncated: 1,135 more rows]
