# Supplementary material for: Viral Dark Matter in the Gut Virome of Elderly Humans
Source: Preprints.org preprint supplement (doi:10.20944/preprints201807.0101.v1), 2018-07-05
Supplement: Supplementary file 10 [file Supp_Table_9_Elderly.viruses.WIsH.results.xlsx]

## Sheet: Supp_Table_6
PHAGE	PREDICTED_HOST_ACCESSION	BACTERIAL_FASTA_DESCRIPTION	BACTERIAL_GENUS_FROM_DESCRIPTION
EM100_T6.NODE_10_LENGTH_5272_COV_7.65823	CP007619.1	BACTEROIDES DOREI ISOLATE HS1_L_1_B_010, COMPLETE GENOME	BACTEROIDES
EM100_T6.NODE_22_LENGTH_2710_COV_5.28362	NC_016791.1	CLOSTRIDIUM SP. BNL1100, COMPLETE GENOME	CLOSTRIDIUM
EM100_T6.NODE_6_LENGTH_6223_COV_11089.9	NC_015177.1	PSEUDOPEDOBACTER SALTANS DSM 12145, COMPLETE GENOME	PSEUDOPEDOBACTER
EM100_T6.NODE_9_LENGTH_6077_COV_2526.44	NC_020207.1	ENTEROCOCCUS FAECIUM NRRL B-2354, COMPLETE GENOME	ENTEROCOCCUS
EM173_T3.NODE_11_LENGTH_6420_COV_9990.05	NC_013928.1	STREPTOCOCCUS MUTANS NN2025 DNA, COMPLETE GENOME	STREPTOCOCCUS
EM173_T3.NODE_12_LENGTH_6310_COV_15.8342	NC_017770.1	SOLITALEA CANADENSIS DSM 3403, COMPLETE GENOME	SOLITALEA
EM173_T3.NODE_13_LENGTH_6120_COV_2571.09	NC_017770.1	SOLITALEA CANADENSIS DSM 3403, COMPLETE GENOME	SOLITALEA
EM173_T3.NODE_14_LENGTH_6085_COV_5.42488	NC_019903.1	DESULFITOBACTERIUM DICHLOROELIMINANS LMG P-21439, COMPLETE GENOME	DESULFITOBACTERIUM
EM173_T3.NODE_17_LENGTH_5843_COV_1127.09	NC_015277.1	SPHINGOBACTERIUM SP. 21, COMPLETE GENOME	SPHINGOBACTERIUM
EM173_T3.NODE_18_LENGTH_5819_COV_191.167	NC_009674.1	BACILLUS CYTOTOXICUS NVH 391-98, COMPLETE GENOME	BACILLUS
EM173_T3.NODE_21_LENGTH_5433_COV_229.197	NC_014734.1	PALUDIBACTER PROPIONICIGENES WB4, COMPLETE GENOME	PALUDIBACTER
EM173_T3.NODE_23_LENGTH_5212_COV_164.74	CP009428.1	PAENIBACILLUS ODORIFER STRAIN DSM 15391, COMPLETE GENOME	PAENIBACILLUS
EM173_T3.NODE_24_LENGTH_5157_COV_1450.92	NC_015732.1	TREPONEMA CALDARIUM DSM 7334, COMPLETE GENOME	TREPONEMA
EM173_T3.NODE_25_LENGTH_5155_COV_280.775	CP009281.1	PAENIBACILLUS SP. FSL R5-0345, COMPLETE GENOME	PAENIBACILLUS
EM173_T3.NODE_27_LENGTH_5016_COV_1149.67	CP009279.1	PAENIBACILLUS SP. FSL H7-0737, COMPLETE GENOME	PAENIBACILLUS
EM173_T3.NODE_28_LENGTH_4886_COV_4.4438	CP002122.1	PREVOTELLA MELANINOGENICA ATCC 25845 CHROMOSOME I, COMPLETE SEQUENCE	PREVOTELLA
EM173_T3.NODE_29_LENGTH_4825_COV_348.304	NC_017770.1	SOLITALEA CANADENSIS DSM 3403, COMPLETE GENOME	SOLITALEA
EM173_T3.NODE_3_LENGTH_37141_COV_18.8105	CP009279.1	PAENIBACILLUS SP. FSL H7-0737, COMPLETE GENOME	PAENIBACILLUS
EM173_T3.NODE_32_LENGTH_4443_COV_1746.33	CP009278.1	SPHINGOBACTERIUM SP. ML3W, COMPLETE GENOME	SPHINGOBACTERIUM
EM173_T3.NODE_33_LENGTH_4186_COV_6.03752	CP007573.1	STREPTOCOCCUS ANGINOSUS STRAIN SA1, COMPLETE GENOME	STREPTOCOCCUS
EM173_T3.NODE_36_LENGTH_3848_COV_3.81334	CP003241.1	VIBRIO SP. EJY3 CHROMOSOME 1, COMPLETE SEQUENCE	VIBRIO
EM173_T3.NODE_40_LENGTH_3716_COV_3.60666	CP009279.1	PAENIBACILLUS SP. FSL H7-0737, COMPLETE GENOME	PAENIBACILLUS
EM173_T3.NODE_42_LENGTH_3369_COV_5.07121	NC_019977.1	METHANOMETHYLOVORANS HOLLANDICA DSM 15978, COMPLETE GENOME	METHANOMETHYLOVORANS
EM173_T3.NODE_7_LENGTH_8664_COV_7.76257	CP009279.1	PAENIBACILLUS SP. FSL H7-0737, COMPLETE GENOME	PAENIBACILLUS
EM173_T3.NODE_8_LENGTH_6611_COV_22.4869	NC_014041.1	ZUNONGWANGIA PROFUNDA SM-A87, COMPLETE GENOME	ZUNONGWANGIA
EM175_T0.NODE_10_LENGTH_8730_COV_5.68715	NC_014393.1	CLOSTRIDIUM CELLULOVORANS 743B, COMPLETE GENOME	CLOSTRIDIUM
EM175_T0.NODE_13_LENGTH_6672_COV_10.5004	NC_017770.1	SOLITALEA CANADENSIS DSM 3403, COMPLETE GENOME	SOLITALEA
EM175_T0.NODE_15_LENGTH_6463_COV_117.537	NC_017770.1	SOLITALEA CANADENSIS DSM 3403, COMPLETE GENOME	SOLITALEA
EM175_T0.NODE_16_LENGTH_6434_COV_115.45	NC_010001.1	LACHNOCLOSTRIDIUM PHYTOFERMENTANS ISDG, COMPLETE GENOME	LACHNOCLOSTRIDIUM
EM175_T0.NODE_18_LENGTH_6161_COV_1419.17	NC_019907.1	LIBERIBACTER CRESCENS BT-1, COMPLETE GENOME	LIBERIBACTER
EM175_T0.NODE_19_LENGTH_6134_COV_6393.87	CP009278.1	SPHINGOBACTERIUM SP. ML3W, COMPLETE GENOME	SPHINGOBACTERIUM
EM175_T0.NODE_2_LENGTH_85426_COV_54.412	NC_010001.1	LACHNOCLOSTRIDIUM PHYTOFERMENTANS ISDG, COMPLETE GENOME	LACHNOCLOSTRIDIUM
EM175_T0.NODE_22_LENGTH_5040_COV_3612.93	CP009279.1	PAENIBACILLUS SP. FSL H7-0737, COMPLETE GENOME	PAENIBACILLUS
EM175_T0.NODE_24_LENGTH_4883_COV_198.493	NC_015277.1	SPHINGOBACTERIUM SP. 21, COMPLETE GENOME	SPHINGOBACTERIUM
EM175_T0.NODE_25_LENGTH_4843_COV_5.35944	CP009281.1	PAENIBACILLUS SP. FSL R5-0345, COMPLETE GENOME	PAENIBACILLUS
EM175_T0.NODE_3_LENGTH_84521_COV_372.977	NC_010001.1	LACHNOCLOSTRIDIUM PHYTOFERMENTANS ISDG, COMPLETE GENOME	LACHNOCLOSTRIDIUM
EM175_T0.NODE_4_LENGTH_50494_COV_102.298	NC_015277.1	SPHINGOBACTERIUM SP. 21, COMPLETE GENOME	SPHINGOBACTERIUM
EM181_T3.NODE_11_LENGTH_3404_COV_1765.41	CP009279.1	PAENIBACILLUS SP. FSL H7-0737, COMPLETE GENOME	PAENIBACILLUS
EM181_T3.NODE_2_LENGTH_58555_COV_110.392	NC_010001.1	LACHNOCLOSTRIDIUM PHYTOFERMENTANS ISDG, COMPLETE GENOME	LACHNOCLOSTRIDIUM
EM195_T0.NODE_1_LENGTH_98920_COV_30.1028	NC_020291.1	CLOSTRIDIUM SACCHAROPERBUTYLACETONICUM N1-4(HMT), COMPLETE GENOME	CLOSTRIDIUM
EM195_T0.NODE_10_LENGTH_6322_COV_1191.84	NC_019907.1	LIBERIBACTER CRESCENS BT-1, COMPLETE GENOME	LIBERIBACTER
EM195_T0.NODE_11_LENGTH_6177_COV_5.50523	NC_012581.1	BACILLUS ANTHRACIS STR. CDC 684, COMPLETE GENOME	BACILLUS
EM195_T0.NODE_17_LENGTH_4193_COV_3.42001	AP014583.1	WINOGRADSKYELLA SP. PG-2 DNA, COMPLETE GENOME	WINOGRADSKYELLA
EM195_T0.NODE_27_LENGTH_2988_COV_3.9867	CP009285.1	PAENIBACILLUS BOREALIS STRAIN DSM 13188, COMPLETE GENOME	PAENIBACILLUS
EM195_T0.NODE_3_LENGTH_46335_COV_10.211	CP010817.1	MYROIDES PROFUNDI STRAIN D25, COMPLETE GENOME	MYROIDES
EM195_T0.NODE_31_LENGTH_2619_COV_4.49649	NC_020291.1	CLOSTRIDIUM SACCHAROPERBUTYLACETONICUM N1-4(HMT), COMPLETE GENOME	CLOSTRIDIUM
EM198_T6.NODE_7_LENGTH_6491_COV_11130.5	NC_017770.1	SOLITALEA CANADENSIS DSM 3403, COMPLETE GENOME	SOLITALEA
EM200_T3.NODE_1_LENGTH_95266_COV_17.3235	CP006777.1	CLOSTRIDIUM BEIJERINCKII ATCC 35702, COMPLETE GENOME	CLOSTRIDIUM
EM200_T3.NODE_24_LENGTH_6740_COV_2592.41	AP014624.1	CHRYSEOBACTERIUM SP. STRB126 DNA, COMPLETE GENOME	CHRYSEOBACTERIUM
EM200_T3.NODE_3_LENGTH_77782_COV_65.9425	NC_016791.1	CLOSTRIDIUM SP. BNL1100, COMPLETE GENOME	CLOSTRIDIUM
EM200_T3.NODE_30_LENGTH_5737_COV_14.1795	NC_012491.1	BREVIBACILLUS BREVIS NBRC 100599 DNA, COMPLETE GENOME	BREVIBACILLUS
EM200_T3.NODE_32_LENGTH_5655_COV_85.878	CP010014.1	BACILLUS SP. YP1, COMPLETE GENOME	BACILLUS
EM200_T3.NODE_35_LENGTH_5360_COV_438.28	NC_016776.1	BACTEROIDES FRAGILIS 638R GENOME	BACTEROIDES
EM200_T3.NODE_36_LENGTH_5217_COV_326.62	NC_010001.1	LACHNOCLOSTRIDIUM PHYTOFERMENTANS ISDG, COMPLETE GENOME	LACHNOCLOSTRIDIUM
EM200_T3.NODE_38_LENGTH_5116_COV_136.257	NC_017909.1	FRANCISELLA NOATUNENSIS SUBSP. ORIENTALIS STR. TOBA 04, COMPLETE GENOME	FRANCISELLA
EM200_T3.NODE_39_LENGTH_5099_COV_866.953	CP009279.1	PAENIBACILLUS SP. FSL H7-0737, COMPLETE GENOME	PAENIBACILLUS
EM200_T3.NODE_4_LENGTH_38745_COV_11.8082	NC_017304.1	RUMINICLOSTRIDIUM THERMOCELLUM DSM 1313, COMPLETE GENOME	RUMINICLOSTRIDIUM
EM200_T3.NODE_40_LENGTH_5074_COV_108.958	CP009281.1	PAENIBACILLUS SP. FSL R5-0345, COMPLETE GENOME	PAENIBACILLUS
EM200_T3.NODE_42_LENGTH_4977_COV_21.0614	CP009279.1	PAENIBACILLUS SP. FSL H7-0737, COMPLETE GENOME	PAENIBACILLUS
EM200_T3.NODE_43_LENGTH_4867_COV_285.103	NC_015277.1	SPHINGOBACTERIUM SP. 21, COMPLETE GENOME	SPHINGOBACTERIUM
EM210_T0.NODE_3_LENGTH_5011_COV_40.8608	CP008876.1	TERRIBACILLUS AIDINGENSIS STRAIN MP602, COMPLETE GENOME	TERRIBACILLUS
EM219_T3.NODE_10_LENGTH_10976_COV_7.18185	NC_015277.1	SPHINGOBACTERIUM SP. 21, COMPLETE GENOME	SPHINGOBACTERIUM
EM219_T3.NODE_12_LENGTH_9528_COV_8.35543	CP006027.1	ESCHERICHIA COLI O145:H28 STR. RM13514, COMPLETE GENOME	ESCHERICHIA
EM219_T3.NODE_139_LENGTH_1353_COV_3.92296	NC_022239.1	STREPTOCOCCUS ANGINOSUS C238, COMPLETE GENOME	STREPTOCOCCUS
EM219_T3.NODE_16_LENGTH_6705_COV_5762.05	NC_017770.1	SOLITALEA CANADENSIS DSM 3403, COMPLETE GENOME	SOLITALEA
EM219_T3.NODE_17_LENGTH_6686_COV_117.082	NC_015177.1	PSEUDOPEDOBACTER SALTANS DSM 12145, COMPLETE GENOME	PSEUDOPEDOBACTER
EM219_T3.NODE_18_LENGTH_6519_COV_4.35412	NC_017576.1	STREPTOCOCCUS GALLOLYTICUS SUBSP. GALLOLYTICUS ATCC 43143 DNA, COMPLETE GENOME	STREPTOCOCCUS
EM219_T3.NODE_19_LENGTH_6355_COV_2239.88	NC_009614.1	BACTEROIDES VULGATUS ATCC 8482, COMPLETE GENOME	BACTEROIDES
EM219_T3.NODE_21_LENGTH_5844_COV_154.047	NC_012491.1	BREVIBACILLUS BREVIS NBRC 100599 DNA, COMPLETE GENOME	BREVIBACILLUS
EM219_T3.NODE_29_LENGTH_5265_COV_11.342	NC_013203.1	ATOPOBIUM PARVULUM DSM 20469, COMPLETE GENOME	ATOPOBIUM
EM219_T3.NODE_31_LENGTH_5165_COV_7.22466	CP009281.1	PAENIBACILLUS SP. FSL R5-0345, COMPLETE GENOME	PAENIBACILLUS
EM219_T3.NODE_32_LENGTH_5157_COV_4.94316	NC_014393.1	CLOSTRIDIUM CELLULOVORANS 743B, COMPLETE GENOME	CLOSTRIDIUM
EM219_T3.NODE_34_LENGTH_4999_COV_1154.51	NC_015276.1	MARINOMONAS MEDITERRANEA MMB-1, COMPLETE GENOME	MARINOMONAS
EM219_T3.NODE_35_LENGTH_4962_COV_13.818	CP010978.1	PELOSINUS FERMENTANS JBW45, COMPLETE GENOME	PELOSINUS
EM219_T3.NODE_36_LENGTH_4873_COV_55.0496	NC_017542.1	PAENIBACILLUS POLYMYXA M1 MAIN CHROMOSOME, COMPLETE GENOME	PAENIBACILLUS
EM219_T3.NODE_38_LENGTH_4168_COV_6.38828	CP007451.1	DRACONIBACTERIUM ORIENTALE STRAIN FH5T, COMPLETE GENOME	DRACONIBACTERIUM
EM219_T3.NODE_39_LENGTH_4148_COV_3.61617	NC_009615.1	PARABACTEROIDES DISTASONIS ATCC 8503, COMPLETE GENOME	PARABACTEROIDES
EM219_T3.NODE_4_LENGTH_39430_COV_16.3294	NC_016631.1	GRANULICELLA MALLENSIS MP5ACTX8, COMPLETE GENOME	GRANULICELLA
EM219_T3.NODE_45_LENGTH_3807_COV_1282.12	CP007626.1	BACILLUS MYCOIDES STRAIN 219298, COMPLETE GENOME	BACILLUS
EM219_T3.NODE_54_LENGTH_2856_COV_4.51089	NC_016894.1	ACETOBACTERIUM WOODII DSM 1030, COMPLETE GENOME	ACETOBACTERIUM
EM219_T3.NODE_6_LENGTH_30373_COV_20.8496	NC_017646.1	ESCHERICHIA COLI O7:K1 STR. CE10, COMPLETE GENOME	ESCHERICHIA
EM229_T3.NODE_1_LENGTH_98245_COV_40.5335	CP009933.1	CLOSTRIDIUM SCATOLOGENES STRAIN ATCC 25775, COMPLETE GENOME	CLOSTRIDIUM
EM229_T3.NODE_14_LENGTH_13082_COV_8.20611	NC_016584.1	DESULFOSPOROSINUS ORIENTIS DSM 765, COMPLETE GENOME	DESULFOSPOROSINUS
EM229_T3.NODE_17_LENGTH_10682_COV_9.86393	NC_020291.1	CLOSTRIDIUM SACCHAROPERBUTYLACETONICUM N1-4(HMT), COMPLETE GENOME	CLOSTRIDIUM
EM229_T3.NODE_2_LENGTH_85728_COV_25.2924	NC_010001.1	LACHNOCLOSTRIDIUM PHYTOFERMENTANS ISDG, COMPLETE GENOME	LACHNOCLOSTRIDIUM
EM229_T3.NODE_23_LENGTH_6537_COV_49.5005	CP009278.1	SPHINGOBACTERIUM SP. ML3W, COMPLETE GENOME	SPHINGOBACTERIUM
EM229_T3.NODE_26_LENGTH_4593_COV_7.5628	CP010976.1	PAENIBACILLUS SP. IHBB 10380, COMPLETE GENOME	PAENIBACILLUS
EM229_T3.NODE_34_LENGTH_3103_COV_3.91273	CP009241.1	PAENIBACILLUS SP. FSL H7-0357, COMPLETE GENOME	PAENIBACILLUS
EM229_T3.NODE_4_LENGTH_64764_COV_18.4032	NC_014393.1	CLOSTRIDIUM CELLULOVORANS 743B, COMPLETE GENOME	CLOSTRIDIUM
EM229_T3.NODE_5_LENGTH_53163_COV_11.7832	NC_014393.1	CLOSTRIDIUM CELLULOVORANS 743B, COMPLETE GENOME	CLOSTRIDIUM
EM231_T3.NODE_12_LENGTH_5202_COV_11.7478	CP009428.1	PAENIBACILLUS ODORIFER STRAIN DSM 15391, COMPLETE GENOME	PAENIBACILLUS
EM231_T3.NODE_14_LENGTH_4538_COV_2254.88	CP007033.1	DEHALOBACTER RESTRICTUS DSM 9455, COMPLETE GENOME	DEHALOBACTER
EM231_T3.NODE_19_LENGTH_3034_COV_8.16482	NC_013721.1	GARDNERELLA VAGINALIS 409-05, COMPLETE GENOME	GARDNERELLA
EM231_T3.NODE_25_LENGTH_2023_COV_8.97713	NC_014639.1	BACILLUS ATROPHAEUS 1942, COMPLETE GENOME	BACILLUS
EM231_T3.NODE_4_LENGTH_6590_COV_22.1663	NC_017770.1	SOLITALEA CANADENSIS DSM 3403, COMPLETE GENOME	SOLITALEA
EM231_T3.NODE_5_LENGTH_6456_COV_630.198	NC_017770.1	SOLITALEA CANADENSIS DSM 3403, COMPLETE GENOME	SOLITALEA
EM231_T3.NODE_6_LENGTH_6314_COV_9.47979	NC_017770.1	SOLITALEA CANADENSIS DSM 3403, COMPLETE GENOME	SOLITALEA
EM231_T3.NODE_7_LENGTH_6060_COV_39.4253	NC_014734.1	PALUDIBACTER PROPIONICIGENES WB4, COMPLETE GENOME	PALUDIBACTER
EM231_T3.NODE_8_LENGTH_6038_COV_18465.7	CP009279.1	PAENIBACILLUS SP. FSL H7-0737, COMPLETE GENOME	PAENIBACILLUS
EM231_T3.NODE_9_LENGTH_5938_COV_371.145	NC_017729.1	BACILLUS ANTHRACIS STR. H9401, COMPLETE GENOME	BACILLUS
EM235_T6.NODE_1_LENGTH_99627_COV_319.279	CP010817.1	MYROIDES PROFUNDI STRAIN D25, COMPLETE GENOME	MYROIDES
EM235_T6.NODE_2_LENGTH_50063_COV_151.402	NC_015277.1	SPHINGOBACTERIUM SP. 21, COMPLETE GENOME	SPHINGOBACTERIUM
EM235_T6.NODE_34_LENGTH_9857_COV_25.9766	NC_009483.1	GEOBACTER URANIIREDUCENS RF4, COMPLETE GENOME	GEOBACTER
EM235_T6.NODE_65_LENGTH_6317_COV_863.389	NC_019907.1	LIBERIBACTER CRESCENS BT-1, COMPLETE GENOME	LIBERIBACTER
EM235_T6.NODE_7_LENGTH_26697_COV_9.5971	NC_016633.1	SPHAEROCHAETA PLEOMORPHA STR. GRAPES, COMPLETE GENOME	SPHAEROCHAETA
EM235_T6.NODE_73_LENGTH_5941_COV_27.4463	NC_004663.1	BACTEROIDES THETAIOTAOMICRON VPI-5482 CHROMOSOME, COMPLETE GENOME	BACTEROIDES
EM235_T6.NODE_75_LENGTH_5796_COV_12.6715	CP009241.1	PAENIBACILLUS SP. FSL H7-0357, COMPLETE GENOME	PAENIBACILLUS
EM235_T6.NODE_86_LENGTH_4960_COV_4.36493	CP009278.1	SPHINGOBACTERIUM SP. ML3W, COMPLETE GENOME	SPHINGOBACTERIUM
EM235_T6.NODE_87_LENGTH_4957_COV_6.51102	NC_015277.1	SPHINGOBACTERIUM SP. 21, COMPLETE GENOME	SPHINGOBACTERIUM
EM241_T0.NODE_1_LENGTH_103013_COV_128.768	CP010817.1	MYROIDES PROFUNDI STRAIN D25, COMPLETE GENOME	MYROIDES
EM241_T0.NODE_10_LENGTH_15718_COV_6.6396	NC_004663.1	BACTEROIDES THETAIOTAOMICRON VPI-5482 CHROMOSOME, COMPLETE GENOME	BACTEROIDES
EM241_T0.NODE_16_LENGTH_10909_COV_7.82477	NC_009441.1	FLAVOBACTERIUM JOHNSONIAE UW101, COMPLETE GENOME	FLAVOBACTERIUM
EM241_T0.NODE_19_LENGTH_9818_COV_8.99027	NC_012581.1	BACILLUS ANTHRACIS STR. CDC 684, COMPLETE GENOME	BACILLUS
EM241_T0.NODE_21_LENGTH_7894_COV_6.85725	NC_014934.1	CELLULOPHAGA ALGICOLA DSM 14237, COMPLETE GENOME	CELLULOPHAGA
EM241_T0.NODE_23_LENGTH_7097_COV_9.75376	NC_012491.1	BREVIBACILLUS BREVIS NBRC 100599 DNA, COMPLETE GENOME	BREVIBACILLUS
EM241_T0.NODE_24_LENGTH_6578_COV_71.0371	NC_009441.1	FLAVOBACTERIUM JOHNSONIAE UW101, COMPLETE GENOME	FLAVOBACTERIUM
EM241_T0.NODE_27_LENGTH_6217_COV_11.2579	NC_022369.1	LACTOCOCCUS LACTIS SUBSP. CREMORIS KW2, COMPLETE GENOME	LACTOCOCCUS
EM241_T0.NODE_31_LENGTH_5995_COV_57.7692	CP008902.1	FLAVOBACTERIUM PSYCHROPHILUM STRAIN 950106-1/1, COMPLETE GENOME	FLAVOBACTERIUM
EM241_T0.NODE_36_LENGTH_4891_COV_71.7206	NC_016610.1	TANNERELLA FORSYTHIA 92A2, COMPLETE GENOME	TANNERELLA
EM241_T0.NODE_37_LENGTH_4700_COV_14.9886	CP008852.1	PELOSINUS SP. UFO1, COMPLETE GENOME	PELOSINUS
EM241_T0.NODE_38_LENGTH_4604_COV_234.987	CP009279.1	PAENIBACILLUS SP. FSL H7-0737, COMPLETE GENOME	PAENIBACILLUS
EM241_T0.NODE_56_LENGTH_2688_COV_5.79985	CP009279.1	PAENIBACILLUS SP. FSL H7-0737, COMPLETE GENOME	PAENIBACILLUS
EM241_T0.NODE_61_LENGTH_2539_COV_4.55636	CP007619.1	BACTEROIDES DOREI ISOLATE HS1_L_1_B_010, COMPLETE GENOME	BACTEROIDES
EM241_T0.NODE_64_LENGTH_2381_COV_4.55503	CP007573.1	STREPTOCOCCUS ANGINOSUS STRAIN SA1, COMPLETE GENOME	STREPTOCOCCUS
EM245_T3.NODE_1_LENGTH_118143_COV_52.1293	NC_016791.1	CLOSTRIDIUM SP. BNL1100, COMPLETE GENOME	CLOSTRIDIUM
EM245_T3.NODE_28_LENGTH_6181_COV_21.563	NC_010001.1	LACHNOCLOSTRIDIUM PHYTOFERMENTANS ISDG, COMPLETE GENOME	LACHNOCLOSTRIDIUM
EM245_T3.NODE_3_LENGTH_98041_COV_58.6819	NC_020291.1	CLOSTRIDIUM SACCHAROPERBUTYLACETONICUM N1-4(HMT), COMPLETE GENOME	CLOSTRIDIUM
EM245_T3.NODE_5_LENGTH_84927_COV_79.2973	NC_010001.1	LACHNOCLOSTRIDIUM PHYTOFERMENTANS ISDG, COMPLETE GENOME	LACHNOCLOSTRIDIUM
EM245_T3.NODE_52_LENGTH_2629_COV_4.72844	NC_013891.1	LISTERIA SEELIGERI SEROVAR 1/2B STR. SLCC3954 COMPLETE GENOME	LISTERIA
EM245_T3.NODE_6_LENGTH_83378_COV_234.054	NC_014393.1	CLOSTRIDIUM CELLULOVORANS 743B, COMPLETE GENOME	CLOSTRIDIUM
EM251_T3.NODE_109_LENGTH_2017_COV_5.70489	AE016796.2	VIBRIO VULNIFICUS CMCP6 CHROMOSOME II, COMPLETE SEQUENCE	VIBRIO
EM251_T3.NODE_11_LENGTH_12732_COV_6.85738	CP009241.1	PAENIBACILLUS SP. FSL H7-0357, COMPLETE GENOME	PAENIBACILLUS
EM251_T3.NODE_2_LENGTH_93009_COV_46.3231	NC_014393.1	CLOSTRIDIUM CELLULOVORANS 743B, COMPLETE GENOME	CLOSTRIDIUM
EM251_T3.NODE_21_LENGTH_6511_COV_26.9094	NC_010001.1	LACHNOCLOSTRIDIUM PHYTOFERMENTANS ISDG, COMPLETE GENOME	LACHNOCLOSTRIDIUM
EM251_T3.NODE_22_LENGTH_6477_COV_19.6204	CP008712.1	BACILLUS CEREUS STRAIN FT9, COMPLETE GENOME	BACILLUS
EM251_T3.NODE_24_LENGTH_6274_COV_30.483	CP010976.1	PAENIBACILLUS SP. IHBB 10380, COMPLETE GENOME	PAENIBACILLUS
EM251_T3.NODE_26_LENGTH_6009_COV_10.3912	NC_012491.1	BREVIBACILLUS BREVIS NBRC 100599 DNA, COMPLETE GENOME	BREVIBACILLUS
EM251_T3.NODE_27_LENGTH_5914_COV_21.0787	NC_009654.1	MARINOMONAS SP. MWYL1, COMPLETE GENOME	MARINOMONAS
EM251_T3.NODE_36_LENGTH_4999_COV_26.4511	CP009279.1	PAENIBACILLUS SP. FSL H7-0737, COMPLETE GENOME	PAENIBACILLUS
EM251_T3.NODE_38_LENGTH_4960_COV_73.1339	CP009279.1	PAENIBACILLUS SP. FSL H7-0737, COMPLETE GENOME	PAENIBACILLUS
EM251_T3.NODE_39_LENGTH_4934_COV_6.38328	CP007626.1	BACILLUS MYCOIDES STRAIN 219298, COMPLETE GENOME	BACILLUS
EM251_T3.NODE_4_LENGTH_78849_COV_53.4296	NC_010001.1	LACHNOCLOSTRIDIUM PHYTOFERMENTANS ISDG, COMPLETE GENOME	LACHNOCLOSTRIDIUM
EM251_T3.NODE_42_LENGTH_4700_COV_1967.5	NC_012581.1	BACILLUS ANTHRACIS STR. CDC 684, COMPLETE GENOME	BACILLUS
EM251_T3.NODE_63_LENGTH_3051_COV_4.22797	NC_014364.1	SEDIMINISPIROCHAETA SMARAGDINAE DSM 11293, COMPLETE GENOME	SEDIMINISPIROCHAETA
EM251_T3.NODE_73_LENGTH_2719_COV_6.82057	NC_015177.1	PSEUDOPEDOBACTER SALTANS DSM 12145, COMPLETE GENOME	PSEUDOPEDOBACTER
EM274_T0.NODE_1_LENGTH_107962_COV_925.094	CP007619.1	BACTEROIDES DOREI ISOLATE HS1_L_1_B_010, COMPLETE GENOME	BACTEROIDES
EM274_T0.NODE_13_LENGTH_5066_COV_8.31451	NC_013166.1	KANGIELLA KOREENSIS DSM 16069, COMPLETE GENOME	KANGIELLA
EM274_T0.NODE_14_LENGTH_5037_COV_5.8322	NC_017770.1	SOLITALEA CANADENSIS DSM 3403, COMPLETE GENOME	SOLITALEA
EM274_T0.NODE_2_LENGTH_48348_COV_21.2684	NC_015277.1	SPHINGOBACTERIUM SP. 21, COMPLETE GENOME	SPHINGOBACTERIUM
EM274_T0.NODE_3_LENGTH_32293_COV_19.3486	NC_015177.1	PSEUDOPEDOBACTER SALTANS DSM 12145, COMPLETE GENOME	PSEUDOPEDOBACTER
EM298_T0.NODE_10_LENGTH_40025_COV_35.5554	NC_014933.1	BACTEROIDES HELCOGENES P 36-108, COMPLETE GENOME	BACTEROIDES
EM298_T0.NODE_101_LENGTH_4802_COV_121.591	CP009279.1	PAENIBACILLUS SP. FSL H7-0737, COMPLETE GENOME	PAENIBACILLUS
EM298_T0.NODE_14_LENGTH_22200_COV_18.0131	CP009281.1	PAENIBACILLUS SP. FSL R5-0345, COMPLETE GENOME	PAENIBACILLUS
EM298_T0.NODE_159_LENGTH_2827_COV_4.90188	CP008741.1	BACTEROIDES DOREI ISOLATE HS1_L_3_B_079, COMPLETE GENOME	BACTEROIDES
EM298_T0.NODE_188_LENGTH_2412_COV_3.57658	NC_014472.1	MARIBACTER SP. HTCC2170, COMPLETE GENOME	MARIBACTER
EM298_T0.NODE_27_LENGTH_13807_COV_6.80483	NC_004193.1	OCEANOBACILLUS IHEYENSIS HTE831 DNA, COMPLETE GENOME	OCEANOBACILLUS
EM298_T0.NODE_32_LENGTH_11313_COV_25.9245	NC_012491.1	BREVIBACILLUS BREVIS NBRC 100599 DNA, COMPLETE GENOME	BREVIBACILLUS
EM298_T0.NODE_5_LENGTH_81480_COV_43.5962	NC_010001.1	LACHNOCLOSTRIDIUM PHYTOFERMENTANS ISDG, COMPLETE GENOME	LACHNOCLOSTRIDIUM
EM298_T0.NODE_58_LENGTH_6729_COV_464.107	NC_015277.1	SPHINGOBACTERIUM SP. 21, COMPLETE GENOME	SPHINGOBACTERIUM
EM298_T0.NODE_62_LENGTH_6612_COV_95.9266	CP008712.1	BACILLUS CEREUS STRAIN FT9, COMPLETE GENOME	BACILLUS
EM298_T0.NODE_70_LENGTH_6089_COV_8.3346	NC_010001.1	LACHNOCLOSTRIDIUM PHYTOFERMENTANS ISDG, COMPLETE GENOME	LACHNOCLOSTRIDIUM
EM298_T0.NODE_73_LENGTH_5959_COV_72.8686	CP008741.1	BACTEROIDES DOREI ISOLATE HS1_L_3_B_079, COMPLETE GENOME	BACTEROIDES
EM298_T0.NODE_74_LENGTH_5914_COV_5.33111	NC_010001.1	LACHNOCLOSTRIDIUM PHYTOFERMENTANS ISDG, COMPLETE GENOME	LACHNOCLOSTRIDIUM
EM298_T0.NODE_75_LENGTH_5787_COV_25.1347	NC_023037.2	PAENIBACILLUS POLYMYXA CR1, COMPLETE GENOME	PAENIBACILLUS
EM298_T0.NODE_8_LENGTH_51152_COV_12.8219	NC_010001.1	LACHNOCLOSTRIDIUM PHYTOFERMENTANS ISDG, COMPLETE GENOME	LACHNOCLOSTRIDIUM
EM298_T0.NODE_81_LENGTH_5577_COV_5.69124	CP008698.1	BACILLUS SUBTILIS SUBSP. SUBTILIS STR. AG1839, COMPLETE GENOME	BACILLUS
EM298_T0.NODE_86_LENGTH_5395_COV_15.4122	NC_016641.1	PAENIBACILLUS TERRAE HPL-003, COMPLETE GENOME	PAENIBACILLUS
EM298_T0.NODE_87_LENGTH_5346_COV_15.8118	CP007619.1	BACTEROIDES DOREI ISOLATE HS1_L_1_B_010, COMPLETE GENOME	BACTEROIDES
EM298_T0.NODE_89_LENGTH_5298_COV_10.1745	CP009428.1	PAENIBACILLUS ODORIFER STRAIN DSM 15391, COMPLETE GENOME	PAENIBACILLUS
EM298_T0.NODE_9_LENGTH_46882_COV_11.5939	CP010817.1	MYROIDES PROFUNDI STRAIN D25, COMPLETE GENOME	MYROIDES
EM298_T0.NODE_91_LENGTH_5257_COV_6.88389	NC_022097.1	TREPONEMA PEDIS STR. T A4, COMPLETE GENOME	TREPONEMA
EM298_T0.NODE_93_LENGTH_5214_COV_36.2435	NC_014622.2	PAENIBACILLUS POLYMYXA SC2, COMPLETE GENOME	PAENIBACILLUS
EM298_T0.NODE_99_LENGTH_4913_COV_8.52223	NC_015277.1	SPHINGOBACTERIUM SP. 21, COMPLETE GENOME	SPHINGOBACTERIUM
EM314_T0.NODE_1_LENGTH_101602_COV_307.528	NC_014393.1	CLOSTRIDIUM CELLULOVORANS 743B, COMPLETE GENOME	CLOSTRIDIUM
EM314_T0.NODE_17_LENGTH_6425_COV_656.027	CP007619.1	BACTEROIDES DOREI ISOLATE HS1_L_1_B_010, COMPLETE GENOME	BACTEROIDES
EM314_T0.NODE_20_LENGTH_6069_COV_448.848	CP009279.1	PAENIBACILLUS SP. FSL H7-0737, COMPLETE GENOME	PAENIBACILLUS
EM314_T0.NODE_22_LENGTH_5019_COV_118.269	CP010978.1	PELOSINUS FERMENTANS JBW45, COMPLETE GENOME	PELOSINUS
EM314_T0.NODE_27_LENGTH_3929_COV_4.1652	NC_012781.1	EUBACTERIUM RECTALE ATCC 33656, COMPLETE GENOME	EUBACTERIUM
EM314_T0.NODE_4_LENGTH_41356_COV_14.5302	NC_010001.1	LACHNOCLOSTRIDIUM PHYTOFERMENTANS ISDG, COMPLETE GENOME	LACHNOCLOSTRIDIUM
EM314_T0.NODE_40_LENGTH_2872_COV_409.657	CP009278.1	SPHINGOBACTERIUM SP. ML3W, COMPLETE GENOME	SPHINGOBACTERIUM
EM314_T0.NODE_41_LENGTH_2795_COV_255.966	NC_014829.1	BACILLUS CELLULOSILYTICUS DSM 2522, COMPLETE GENOME	BACILLUS
EM314_T0.NODE_42_LENGTH_2778_COV_196.675	CP008878.1	FLAVOBACTERIUM PSYCHROPHILUM STRAIN V3-5, COMPLETE GENOME	FLAVOBACTERIUM
EM314_T0.NODE_6_LENGTH_26300_COV_11.8854	CP010434.1	BACILLUS SUBTILIS SUBSP. SPIZIZENII STRAIN NRS 231, COMPLETE GENOME	BACILLUS
EM318_T0.NODE_1_LENGTH_84326_COV_47.8923	AP014583.1	WINOGRADSKYELLA SP. PG-2 DNA, COMPLETE GENOME	WINOGRADSKYELLA
EM318_T0.NODE_12_LENGTH_23955_COV_3614.23	CP006837.1	LYSINIBACILLUS VARIANS STRAIN GY32, COMPLETE GENOME	LYSINIBACILLUS
EM318_T0.NODE_2_LENGTH_42727_COV_18.1325	NC_018678.1	ALTEROMONAS MACLEODII STR. 'ENGLISH CHANNEL 673', COMPLETE GENOME	ALTEROMONAS
EM318_T0.NODE_296_LENGTH_1681_COV_4.89483	NC_015703.1	RUNELLA SLITHYFORMIS DSM 19594, COMPLETE GENOME	RUNELLA
EM318_T0.NODE_3_LENGTH_42252_COV_23.2668	NC_014933.1	BACTEROIDES HELCOGENES P 36-108, COMPLETE GENOME	BACTEROIDES
EM318_T0.NODE_50_LENGTH_7420_COV_5.96008	NC_009655.1	ACTINOBACILLUS SUCCINOGENES 130Z, COMPLETE GENOME	ACTINOBACILLUS
EM318_T0.NODE_57_LENGTH_6655_COV_1239.45	NC_010001.1	LACHNOCLOSTRIDIUM PHYTOFERMENTANS ISDG, COMPLETE GENOME	LACHNOCLOSTRIDIUM
EM318_T0.NODE_6_LENGTH_33839_COV_8.3285	NC_018178.1	MELIORIBACTER ROSEUS P3M, COMPLETE GENOME	MELIORIBACTER
EM318_T0.NODE_60_LENGTH_6411_COV_62.6963	NC_006347.1	BACTEROIDES FRAGILIS YCH46 DNA, COMPLETE GENOME	BACTEROIDES
EM318_T0.NODE_61_LENGTH_6399_COV_541.824	CP009279.1	PAENIBACILLUS SP. FSL H7-0737, COMPLETE GENOME	PAENIBACILLUS
EM318_T0.NODE_62_LENGTH_6337_COV_19.6493	CP007619.1	BACTEROIDES DOREI ISOLATE HS1_L_1_B_010, COMPLETE GENOME	BACTEROIDES
EM318_T0.NODE_65_LENGTH_6201_COV_120.388	CP007619.1	BACTEROIDES DOREI ISOLATE HS1_L_1_B_010, COMPLETE GENOME	BACTEROIDES
EM318_T0.NODE_66_LENGTH_6173_COV_6.00964	NC_017595.1	STREPTOCOCCUS SALIVARIUS JIM8777 COMPLETE GENOME	STREPTOCOCCUS
EM318_T0.NODE_67_LENGTH_6169_COV_1269.72	NC_010184.1	BACILLUS WEIHENSTEPHANENSIS KBAB4, COMPLETE GENOME	BACILLUS
EM318_T0.NODE_72_LENGTH_5994_COV_66.5907	NC_012491.1	BREVIBACILLUS BREVIS NBRC 100599 DNA, COMPLETE GENOME	BREVIBACILLUS
EM318_T0.NODE_77_LENGTH_5808_COV_4.97341	NC_010939.1	ACTINOBACILLUS PLEUROPNEUMONIAE SEROVAR 7 STR. AP76, COMPLETE GENOME	ACTINOBACILLUS
EM318_T0.NODE_86_LENGTH_5383_COV_15.8502	NC_014622.2	PAENIBACILLUS POLYMYXA SC2, COMPLETE GENOME	PAENIBACILLUS
EM318_T0.NODE_88_LENGTH_5369_COV_278.012	NC_020304.1	DESULFOCAPSA SULFEXIGENS DSM 10523, COMPLETE GENOME	DESULFOCAPSA
EM318_T0.NODE_9_LENGTH_29056_COV_53.6699	NC_014828.1	ETHANOLIGENENS HARBINENSE YUAN-3, COMPLETE GENOME	ETHANOLIGENENS
EM318_T0.NODE_90_LENGTH_5303_COV_91.4531	CP006872.1	PAENIBACILLUS POLYMYXA SQR-21, COMPLETE GENOME	PAENIBACILLUS
EM318_T0.NODE_92_LENGTH_5160_COV_4.02782	NC_014393.1	CLOSTRIDIUM CELLULOVORANS 743B, COMPLETE GENOME	CLOSTRIDIUM
EM318_T0.NODE_98_LENGTH_4899_COV_5.90793	NC_009654.1	MARINOMONAS SP. MWYL1, COMPLETE GENOME	MARINOMONAS
