# Supplementary figures and images for: Viral Dark Matter in the Gut Virome of Elderly Humans
Source: Preprints.org preprint supplement (doi:10.20944/preprints201807.0101.v1), 2018-07-05

# B

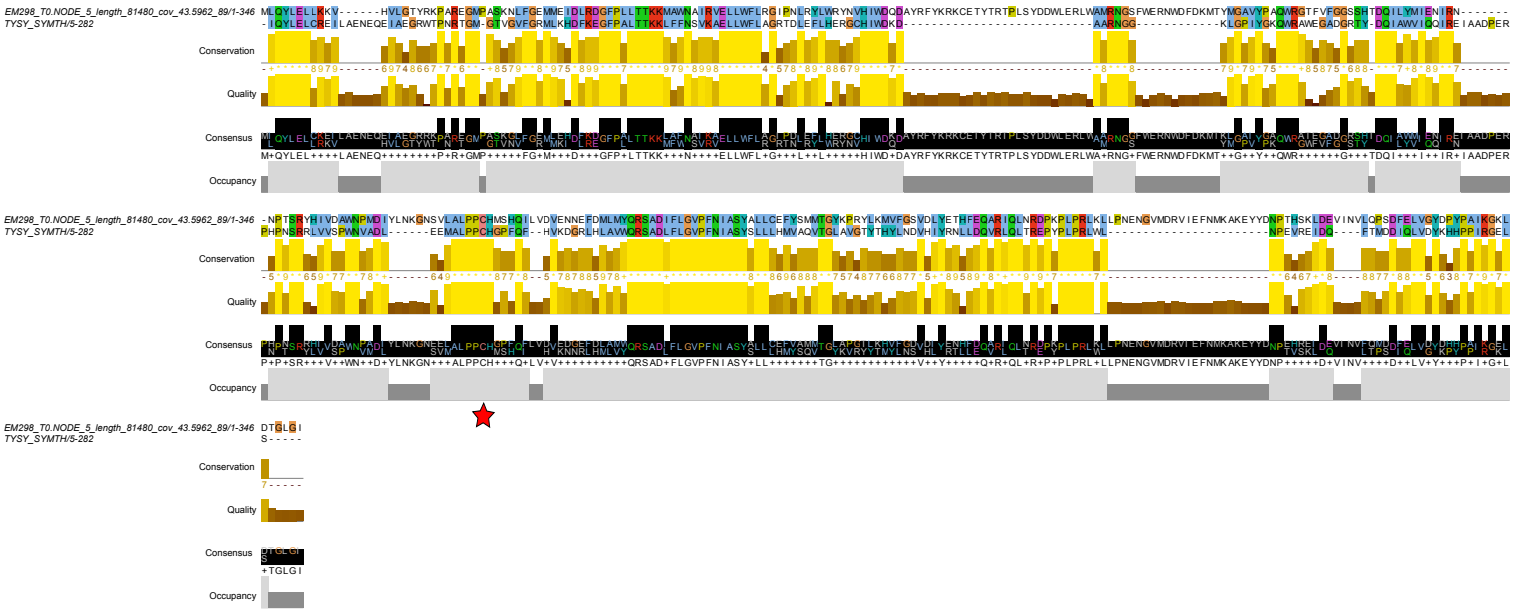

Supplement: Supplementary file 1 [file supplementary]

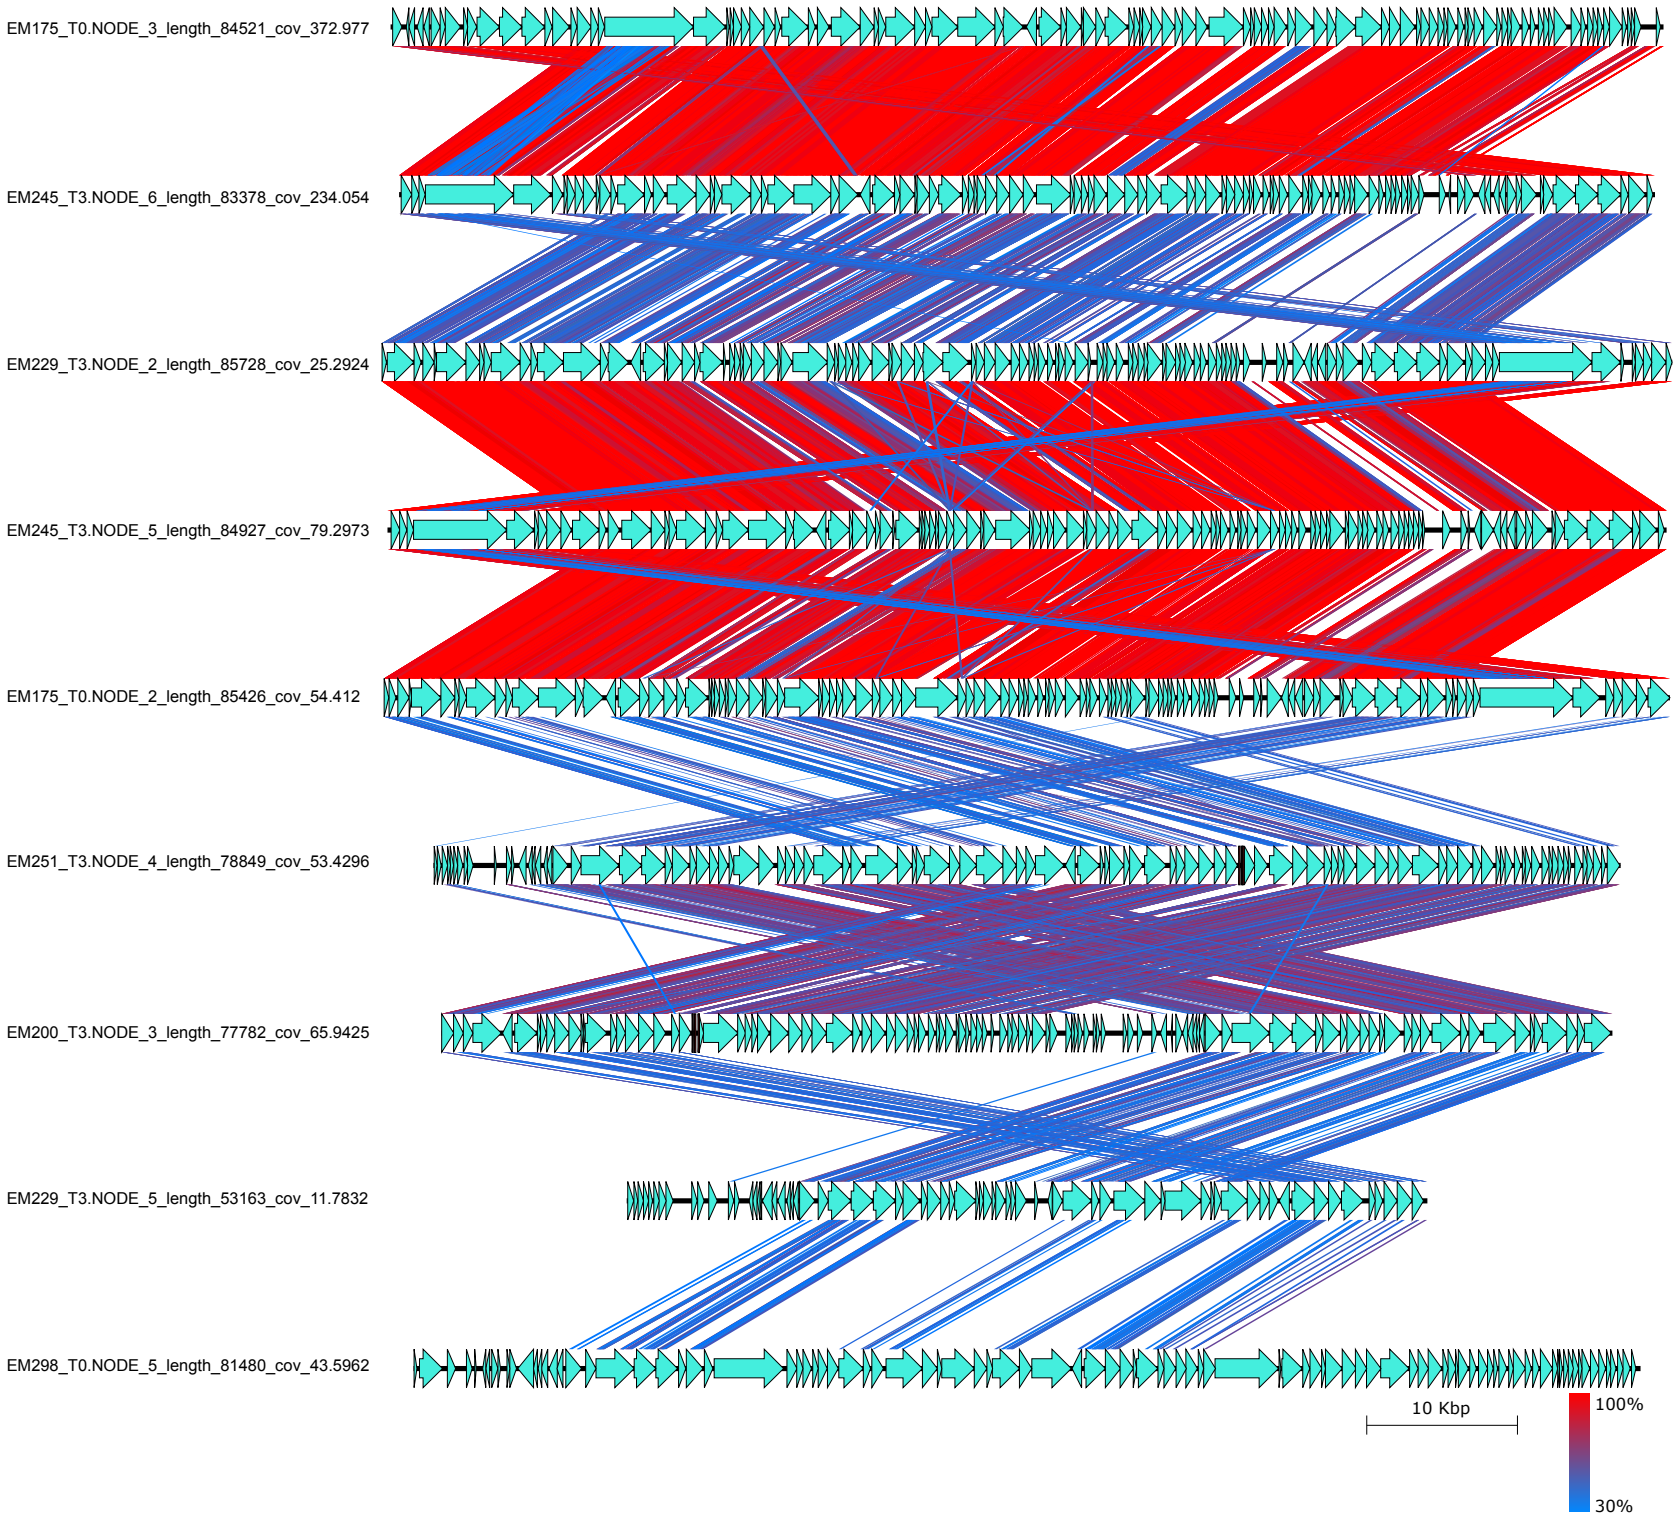

Supplement: Supplementary file 2 [file supplementary]

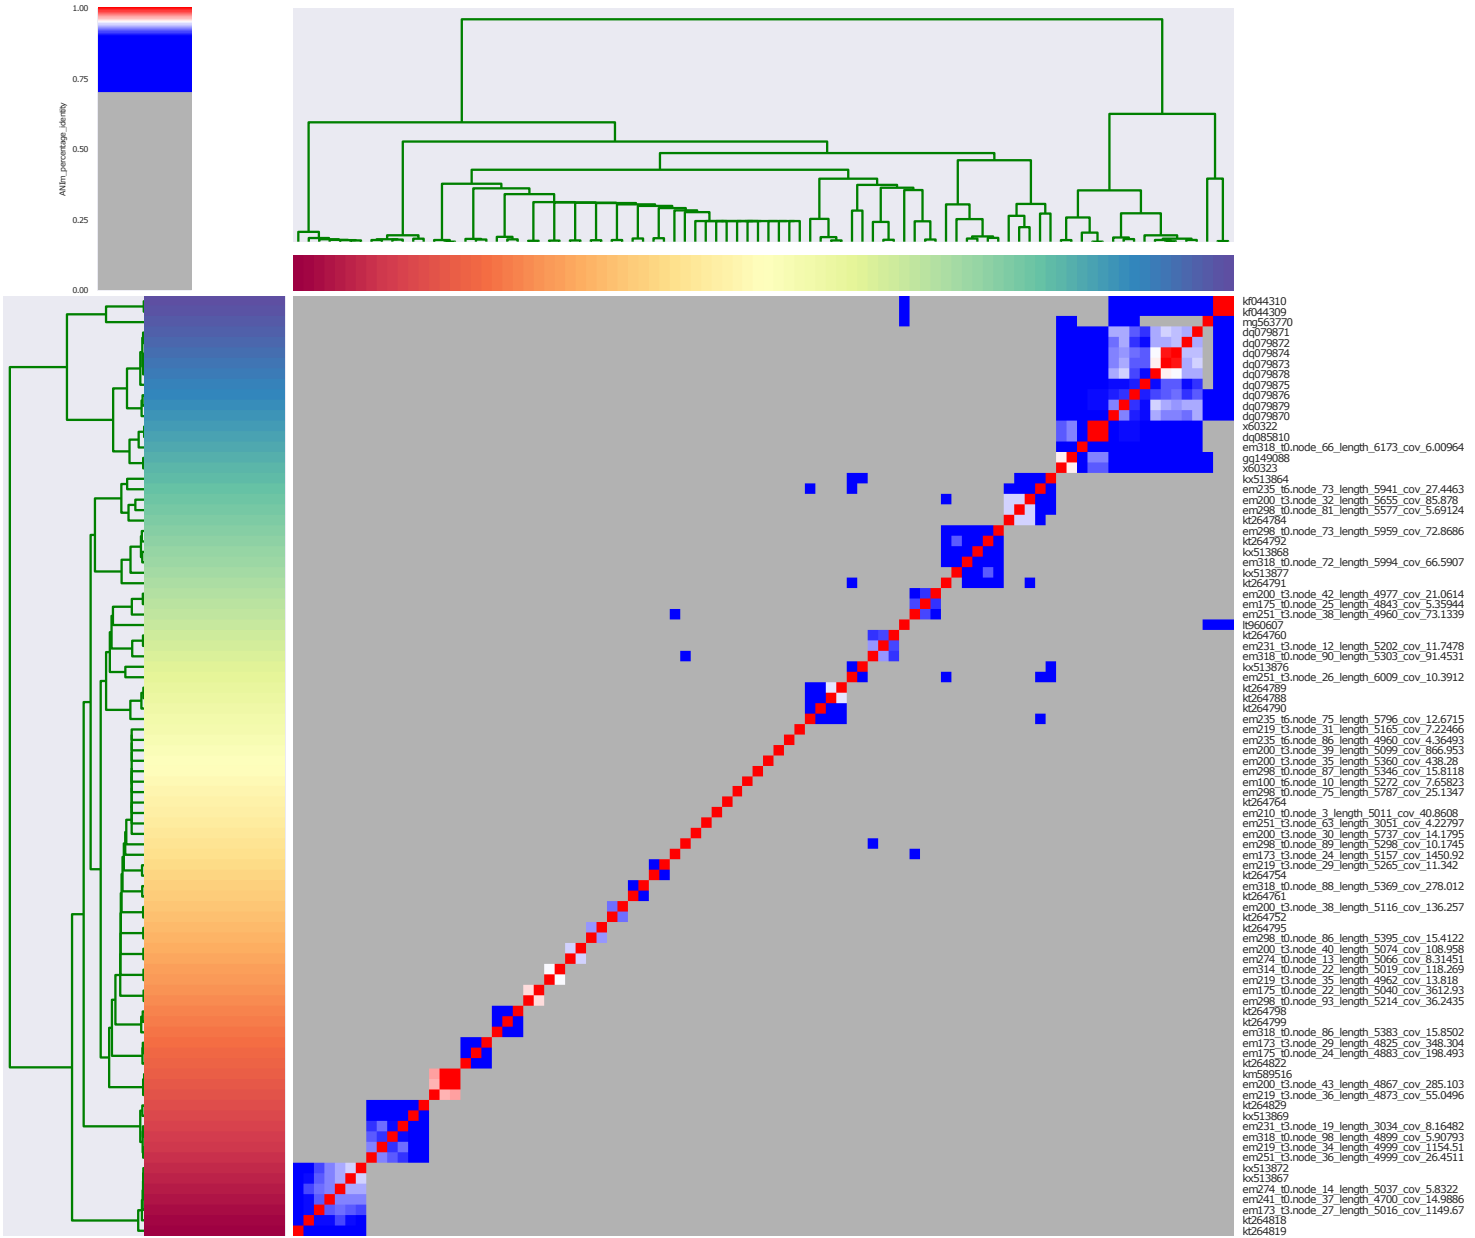

Supplement: Supplementary file 3 [file supplementary]

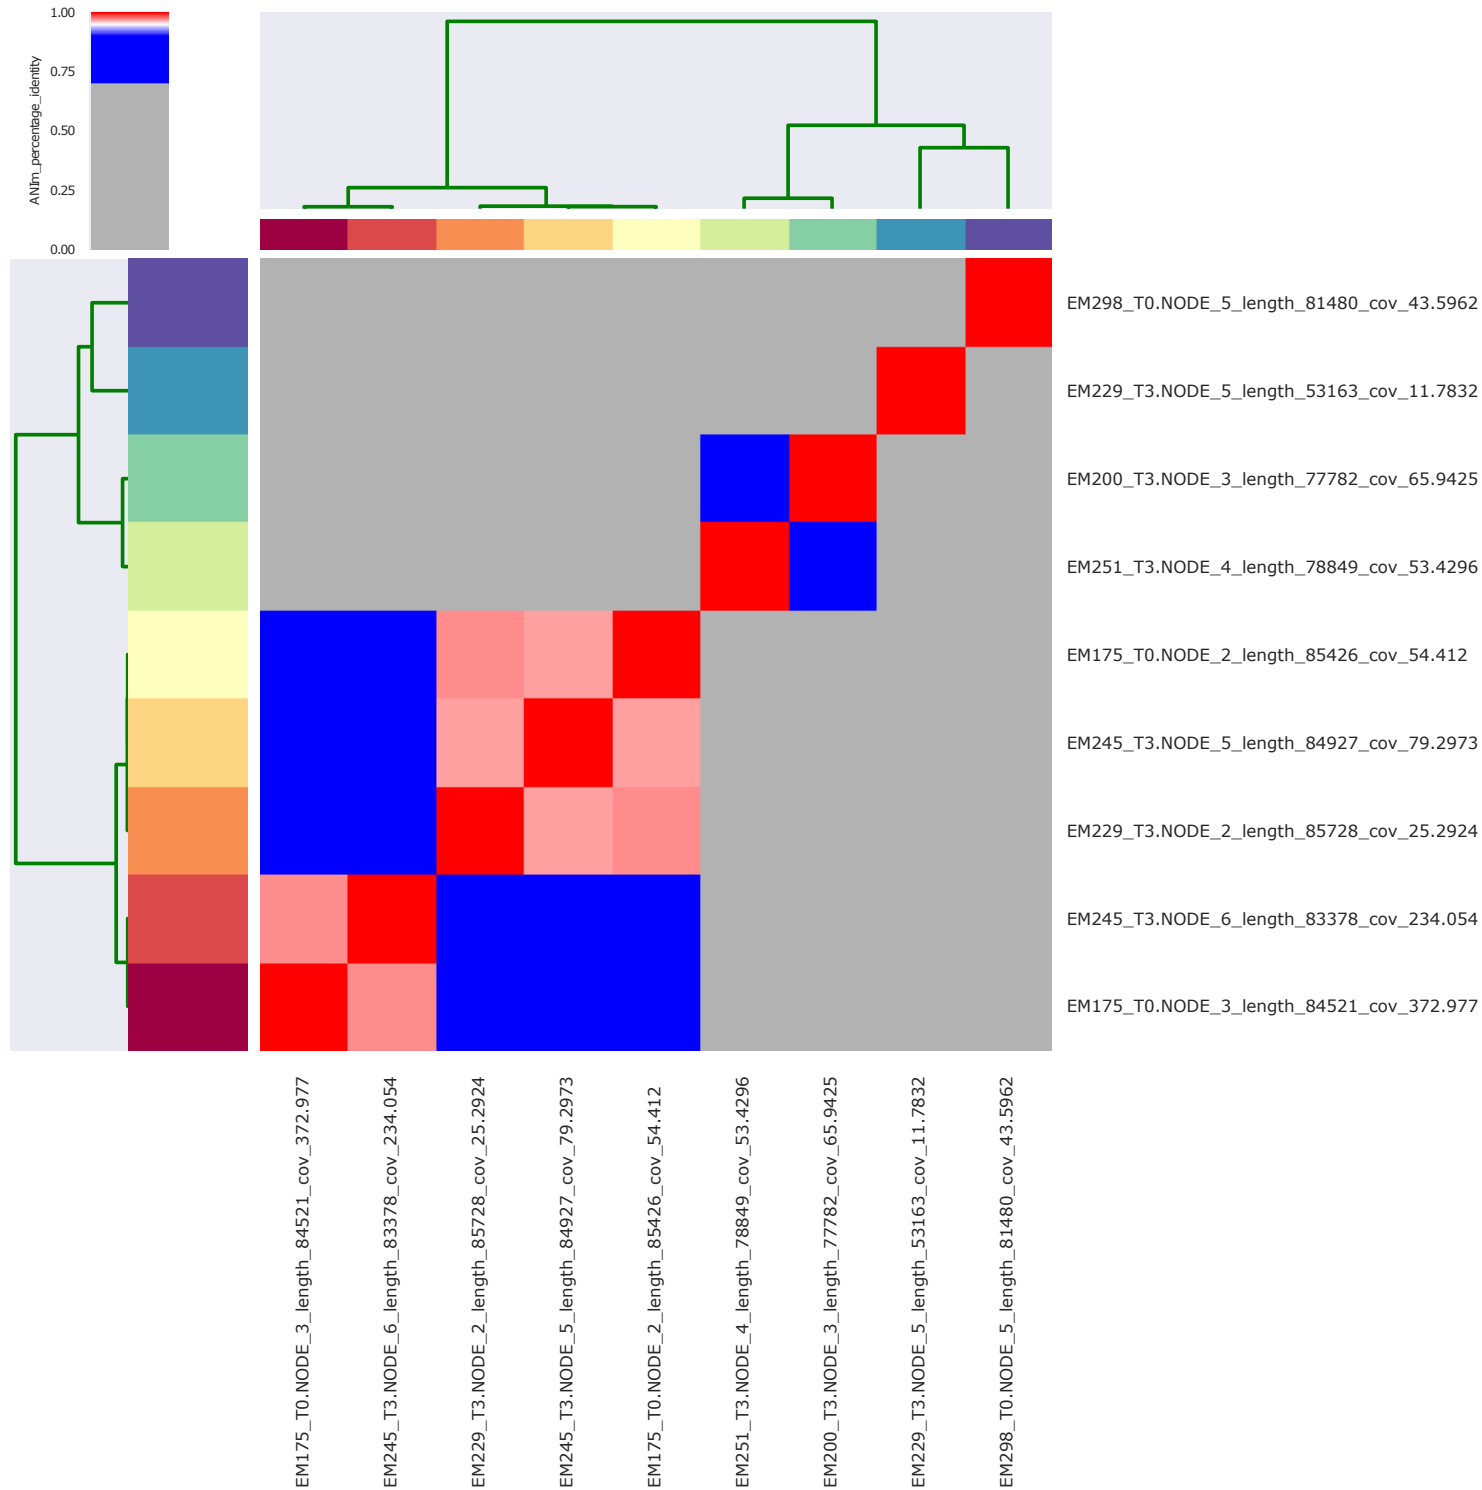

Supplement: Supplementary file 4 [file supplementary]

Prediction of the Host Bacterial Genera to Phages in Elderly Faeces

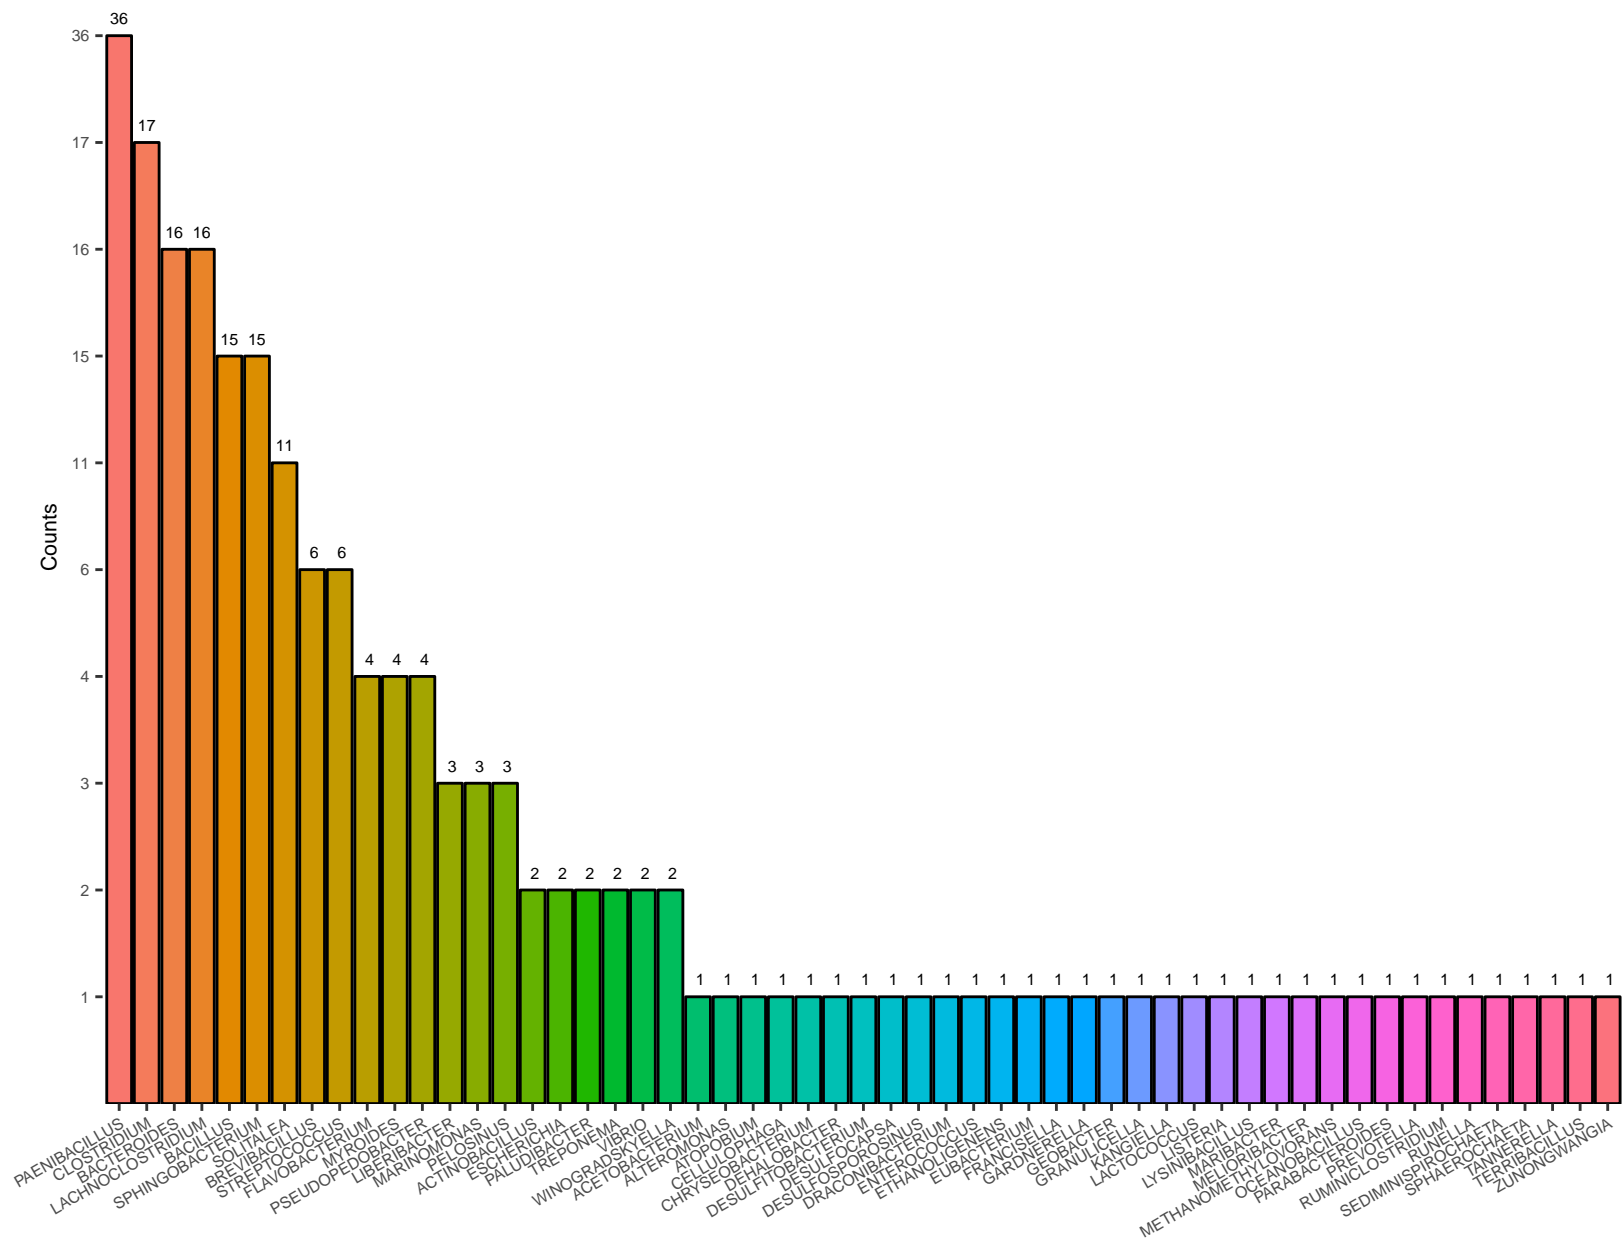

Supplement: Supplementary file 5 [file supplementary]

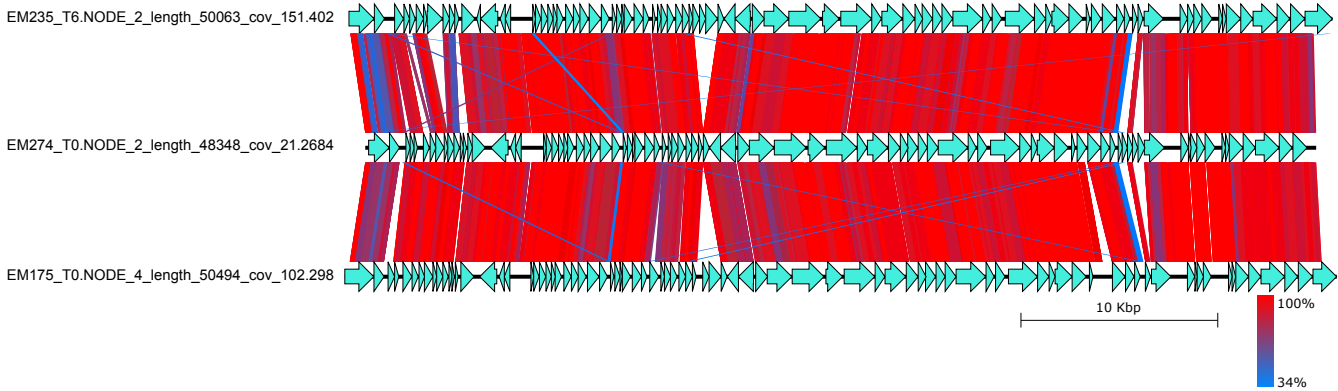

Supplement: Supplementary file 6 [file supplementary]
